# Supplementary material
Source: publisher figshare collection journal article supplement (https://karger.figshare.com/articles/dataset/_/4748017)

**Article Title:** Gene Expression Changes in Spleens and Livers of Tumour-Bearing Mice Suggest Anti-Inflammatory Effects of Oil Palm Phenolics in Delaying Tumour Growth.

**Journal Name:** OMICS: A Journal of Integrative Biology.

**Author Names:** Soon-Sen Leow, Shamala Devi Sekaran, Kalyana Sundram, YewAi Tan, and Ravigadevi Sambanthamurthi.

**Corresponding Author:** Ravigadevi Sambanthamurthi; Malaysian Palm Oil Board, No. 6, Persiaran Institusi, Bandar Baru Bangi, 43000 Kajang, Selangor, Malaysia; E-mail: [raviga@mpob.gov.my](mailto:raviga@mpob.gov.my).

## SUPPLEMENTARY MATERIAL 5.

Real-time qRT-PCR validation.

(A) Genes used in real-time qRT-PCR validation experiments. These four target genes, *Sirt1* (spleen), *Tgfb1* (spleen), *Rxra* (liver) and *Tiam1* (liver), were selected based on their functional significance, their statistical significance, their presence as single splice transcripts in microarrays and their availability as Taqman assays designed across splice junctions. The three most stable out of four housekeeping genes tested (*Rasa1*, *Sema4a*, *Tpst2* and *18S rRNA*), as determined by the geNorm software, were used to normalise the gene expression data of the target genes.

(B) Correlation of gene expression fold changes between microarray and real-time qRT-PCR data. Validation of the microarray data via real-time qRT-PCR shows that correlation of fold changes obtained by these two gene expression profiling techniques was high with an  $R^2 = 0.9444$ .

**A**

| Sample | Symbol          | Definition                                                                                                                        | Assay ID      |
|--------|-----------------|-----------------------------------------------------------------------------------------------------------------------------------|---------------|
| Spleen | <i>Sirt1</i>    | <i>Mus musculus</i> sirtuin 1 (silent mating type information regulation 2 homologue) 1 ( <i>Saccharomyces cerevisiae</i> )       | Mm00490758_m1 |
| Spleen | <i>Tgfb1</i>    | <i>Mus musculus</i> transforming growth factor beta 1                                                                             | Mm00441724_m1 |
| Liver  | <i>Rxra</i>     | <i>Mus musculus</i> retinoid X receptor alpha                                                                                     | Mm00441182_m1 |
| Liver  | <i>Tiam1</i>    | <i>Mus musculus</i> T-cell lymphoma invasion and metastasis 1                                                                     | Mm00437071_m1 |
| All    | <i>Rasa1</i>    | <i>Mus musculus</i> RAS p21 protein activator 1                                                                                   | Mm00520858_m1 |
| All    | <i>Sema4a</i>   | <i>Mus musculus</i> sema domain immunoglobulin domain (Ig) transmembrane domain (TM) and short cytoplasmic domain (semaphorin) 4A | Mm00443140_m1 |
| All    | <i>Tpst2</i>    | <i>Mus musculus</i> protein-tyrosine sulphotransferase 2                                                                          | Mm00493809_m1 |
| All    | <i>18S rRNA</i> | Eukaryotic 18S rRNA endogenous control                                                                                            | 4352930E      |

**B**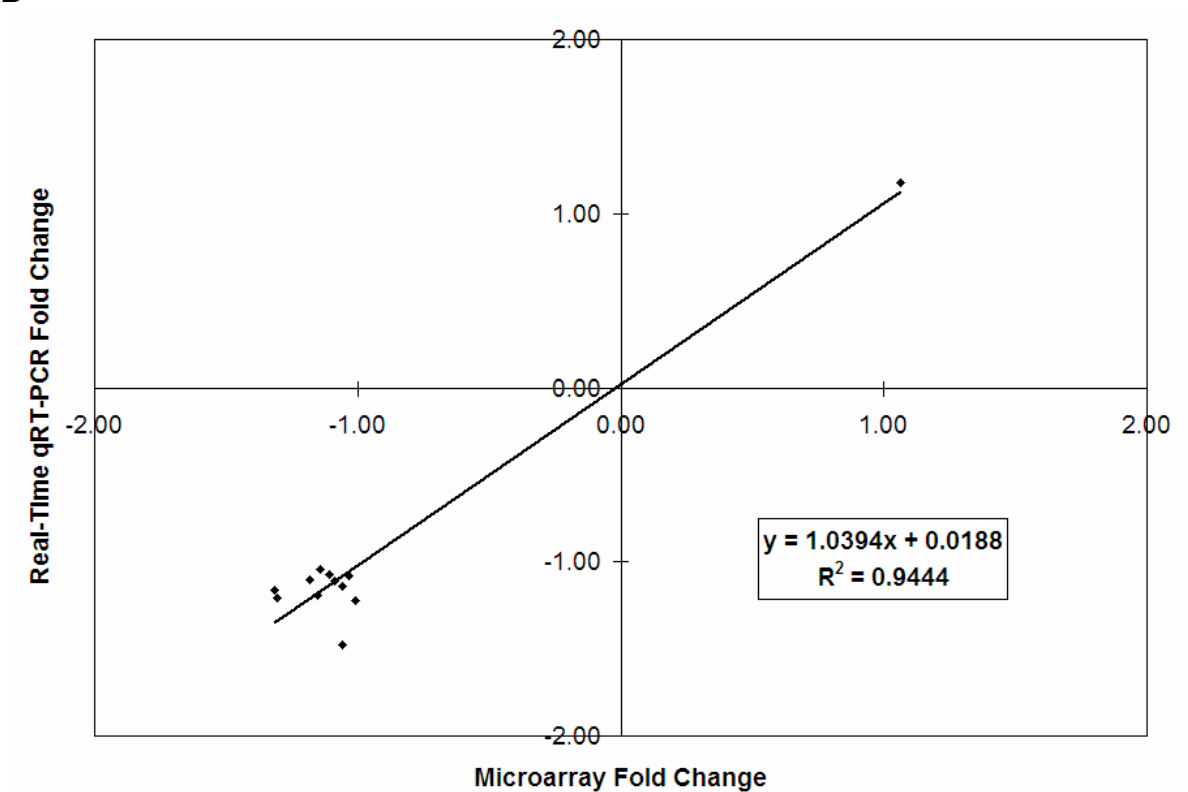

Supplement: Supplementary file 1 [file 1 › JNN_201305003_1_15.pdf]
