# Supplementary material
Source: publisher figshare collection journal article supplement (https://karger.figshare.com/articles/dataset/_/4748017)
Supplement: Supplementary file 1 [file 1]

Archive with 5 entries (5 files):
- JNN_201305003_1_11.pdf
- JNN_201305003_1_12.pdf
- JNN_201305003_1_13.pdf
- JNN_201305003_1_14.pdf
- JNN_201305003_1_15.pdf
