# Supplementary material
Source: publisher figshare collection journal article supplement (https://karger.figshare.com/articles/dataset/_/4748017)
Supplement: Supplementary file 1 [file 1 › JNN_201305003_1_11.pdf]

**Article Title:** Gene Expression Changes in Spleens and Livers of Tumour-Bearing Mice Suggest Anti-Inflammatory Effects of Oil Palm Phenolics in Delaying Tumour Growth.

**Journal Name:** Journal of Nutrigenetics and Nutrigenomics.

**Author Names:** Soon-Sen Leow, Shamala Devi Sekaran, Kalyana Sundram, YewAi Tan, Ravigadevi Sambanthamurthi.

**Corresponding Author:** Ravigadevi Sambanthamurthi; Malaysian Palm Oil Board, No. 6, Persiaran Institusi, Bandar Baru Bangi, 43000 Kajang, Selangor, Malaysia; E-mail: [raviga@mpob.gov.my](mailto:raviga@mpob.gov.my).

## **SUPPLEMENTARY MATERIAL 1.**

List of genes significantly changed across time in spleens and livers of mice supplemented with OPP (Treatment group versus control group in mice injected with J558 myeloma cells at three time points). The gene lists in each K-means cluster, together with their descriptions and log<sub>2</sub> fold changes for each time point (eighteen weeks, one week, four weeks) as compared to their time-matched controls, are listed.

**(A)** Genes significantly up-regulated across time in spleens.

**(B)** Genes significantly down-regulated across time in spleens.

**(C)** Genes significantly up-regulated across time in livers.

**(D)** Genes significantly down-regulated across time in livers.

| A                                                    |                  |                |                 |                    |                  |                   |                  |                |                 |               | Definition  |                                                                                                                |
|------------------------------------------------------|------------------|----------------|-----------------|--------------------|------------------|-------------------|------------------|----------------|-----------------|---------------|-------------|----------------------------------------------------------------------------------------------------------------|
| Gene Name                                            | Control 16 Hours | Control 1 Week | Control 4 Weeks | Treatment 16 Hours | Treatment 1 Week | Treatment 4 Weeks | Log2 FC 16 Hours | Log2 FC 1 Week | Log2 FC 4 Weeks | Symbol        |             |                                                                                                                |
| GI_21070949.S                                        | 0.91             | 1.05           | 1.31            | 0.83               | 0.94             | 1.40              | -0.14            | -0.17          | 0.10            | Ubic          | NM_019639.2 | Mus musculus ubiquitin C (Ub) mRNA.                                                                            |
| GI_28476905.S                                        | 0.83             | 1.08           | 1.29            | 0.77               | 0.90             | 1.40              | -0.12            | -0.27          | 0.11            | 3010033P07Rik | NM_133123.4 | Mus musculus RIKEN cDNA 3010033P07 gene (3010033P07Rik) mRNA.                                                  |
| gi_31981889.ref.NM_009735.2_43-S                     | 1.02             | 0.94           | 1.34            | 0.86               | 0.79             | 1.32              | -0.26            | -0.26          | -0.02           | B2m           | NM_009735.2 | Mus musculus beta-2 microglobulin (B2m) mRNA.                                                                  |
| gi_32129296.ref.NM_009438.3_526-S                    | 0.83             | 1.02           | 1.26            | 0.72               | 1.06             | 1.59              | -0.21            | 0.04           | 0.34            | Rpl13a        | NM_009438.3 | Mus musculus ribosomal protein L13a (Rpl13a) mRNA.                                                             |
| gi_6679936.ref.NM_008084.1_328-S                     | 1.17             | 0.93           | 1.10            | 0.86               | 0.81             | 1.06              | -0.46            | -0.20          | -0.05           |               |             |                                                                                                                |
| IGHV1S105.133944.Ig heavy variable 1S105 10-S        | 0.89             | 1.15           | 1.14            | 0.83               | 0.98             | 1.36              | -0.10            | -0.22          | 0.28            |               |             |                                                                                                                |
| IGHV1S30.X02462.Ig heavy variable 1S30 12-S          | 0.84             | 1.09           | 1.11            | 0.82               | 0.94             | 1.53              | -0.04            | -0.08          | 0.48            |               |             |                                                                                                                |
| IGKV1-110.D00080SM15566.Ig kappa variable 1-110 11-S | 0.79             | 1.03           | 1.54            | 0.66               | 0.88             | 1.94              | -0.25            | -0.24          | 0.34            | Igk-V1        | NM_355776.1 |                                                                                                                |
| IGKV1-131.AJ231197.Ig kappa variable 1-131 20-S      | 0.90             | 1.44           | 2.11            | 0.86               | 0.85             | 1.97              | -0.09            | -0.68          | -0.04           |               |             |                                                                                                                |
| IGKV1-132.AJ231198.Ig kappa variable 1-132 20-S      | 0.89             | 1.44           | 2.08            | 0.88               | 0.87             | 2.06              | -0.03            | -0.65          | 0.04            | LOC243423     | XM_144770.2 | Mus musculus similar to immunoglobulin light chain variable region (LOC243423) mRNA.                           |
| IGKV14-100.AJ231243.Ig kappa variable 14-100 12-S    | 1.13             | 0.97           | 1.58            | 0.71               | 0.88             | 2.85              | -0.58            | -0.08          | 0.88            |               |             |                                                                                                                |
| IGKV6-20.Y15981.Ig kappa variable 6-20 12-S          | 0.81             | 1.50           | 1.24            | 0.82               | 0.94             | 1.74              | -0.01            | -0.62          | 0.50            |               |             |                                                                                                                |
| IGKV6-29.AJ235967.Ig kappa variable 6-29 14-S        | 0.77             | 1.39           | 1.15            | 0.77               | 0.90             | 1.53              | 0.00             | -0.59          | 0.41            |               |             |                                                                                                                |
| IGKV6-18.Y15979.Ig kappa variable 6-18 12-S          | 0.92             | 1.26           | 1.42            | 0.81               | 0.91             | 1.79              | -0.17            | -0.44          | 0.37            |               |             |                                                                                                                |
| sc000028.1.0-S                                       | 0.89             | 1.08           | 1.33            | 0.72               | 0.93             | 1.94              | -0.30            | -0.22          | 0.02            | Bccip         | NM_025392.1 | Mus musculus BRCA2 and CDKN1A interacting protein (Bccip) mRNA.                                                |
| sc000043.1.1.REVCOMP-S                               | 1.29             | 0.83           | 1.05            | 1.05               | 0.58             | 0.89              | -0.31            | -0.48          | -0.26           |               |             |                                                                                                                |
| sc000045.1.44.REVCOMP-S                              | 0.91             | 1.12           | 1.24            | 0.80               | 0.91             | 1.22              | -0.19            | -0.30          | -0.02           | Ppp1ca        | NM_031868.1 | Mus musculus protein phosphatase 1 catalytic subunit alpha isoform (Ppp1ca) mRNA.                              |
| sc000080.1.69.REVCOMP-S                              | 0.84             | 1.11           | 1.26            | 0.79               | 0.90             | 1.39              | -0.08            | -0.31          | 0.14            | Fanci         | NM_025923.2 | Mus musculus Fanconi anemia complementation group L (Fanci) mRNA.                                              |
| sc000087.1.18-S                                      | 0.94             | 1.01           | 1.11            | 0.85               | 0.87             | 1.22              | -0.14            | -0.21          | 0.14            | D11Wsu99e     | NM_013581.2 | Mus musculus DNA segment Chr 11 Wayne State University 99 expressed (D11Wsu99e) mRNA.                          |
| sc000091.1.36-S                                      | 1.02             | 0.82           | 1.21            | 0.93               | 0.77             | 1.38              | -0.14            | -0.25          | 0.20            | Whb           | NM_016800.2 | Mus musculus arginase type II (Arg2) mRNA.                                                                     |
| sc000090.1.16-S                                      | 0.95             | 1.08           | 1.26            | 0.89               | 0.91             | 1.16              | -0.16            | -0.22          | 0.11            | Tcd1          | NM_011552.2 | Mus musculus cholesteryl (C-X-C motif) ligand 12 (Cxd12) transcript variant 1 (Tcd1) mRNA.                     |
| sc000091.1.88-S                                      | 0.74             | 1.02           | 1.19            | 0.62               | 1.00             | 1.43              | -0.24            | -0.02          | 0.28            | Phf10         | NM_024250.3 | Mus musculus vesicle-associated membrane protein 8 (Vamp8) mRNA.                                               |
| sc00010.1.38-S                                       | 1.01             | 0.97           | 1.25            | 0.96               | 0.83             | 1.21              | -0.06            | -0.23          | -0.04           | Emp3          | NM_010129.1 | Mus musculus epithelial membrane protein 3 (Emp3) mRNA.                                                        |
| sc00010131.0-S                                       | 0.88             | 1.18           | 1.26            | 0.82               | 0.87             | 1.26              | -0.10            | -0.42          | 0.01            | Bcl2          | NM_177410.1 | Mus musculus B-cell leukemia/lymphoma 2 (Bcl2) mRNA.                                                           |
| sc00010161.199-S                                     | 0.96             | 0.93           | 1.19            | 0.93               | 1.17             | 1.62              | -0.04            | 0.32           | 0.45            | Asns          | NM_012055.1 | Mus musculus asparagine synthetase (Asns) mRNA.                                                                |
| sc0001023.1.2-S                                      | 1.07             | 0.95           | 1.20            | 0.87               | 1.01             | 1.07              | -0.30            | -0.22          | -0.16           | Capza2        | NM_007604.1 | Mus musculus capping protein (actin filament) muscle Z-line alpha 2 (Capza2) mRNA.                             |
| sc0001042.1.14-S                                     | 1.01             | 1.02           | 1.27            | 0.84               | 0.92             | 1.51              | -0.27            | -0.14          | 0.26            | Mmp25         | NM_025579.2 | Mus musculus mitochondrial ribosomal protein S25 (Mmp25) mRNA.                                                 |
| sc0001287.1.120-S                                    | 0.93             | 1.08           | 1.33            | 0.89               | 0.91             | 1.76              | -0.08            | -0.23          | 0.13            | Cod1          | NM_021704.1 | Mus musculus cholesteryl (C-X-C motif) ligand 12 (Cod1) transcript variant 2 mRNA.                             |
| sc0001079.1.24-S                                     | 0.94             | 1.01           | 1.33            | 0.86               | 0.86             | 1.42              | -0.12            | -0.23          | 0.09            | Vamp8         | NM_016794.2 | Mus musculus vesicle-associated membrane protein 8 (Vamp8) mRNA.                                               |
| sc0001081.1.37-S                                     | 1.01             | 1.05           | 1.16            | 0.82               | 0.81             | 1.17              | -0.29            | -0.36          | 0.01            | Camk1         | NM_133926.1 | Mus musculus calcium/calmodulin-dependent protein kinase 1 (Camk1) mRNA.                                       |
| sc0001102.1.1-S                                      | 0.99             | 0.97           | 1.17            | 0.88               | 0.97             | 1.57              | -0.16            | 0.01           | 0.42            | Sudg1         | NM_019879.1 | Mus musculus succinate-CoA ligase GDP-forming alpha subunit (Sudg1) mRNA.                                      |
| sc000112.1.18-S                                      | 1.11             | 1.13           | 1.15            | 0.91               | 0.88             | 0.99              | -0.29            | -0.36          | -0.22           | Coro1a        | NM_009898.2 | Mus musculus coronin actin binding protein 1A (Coro1a) mRNA.                                                   |
| sc0001121.1.1-S                                      | 0.99             | 1.00           | 1.27            | 0.80               | 0.86             | 1.44              | -0.32            | -0.22          | 0.19            | Ndufa5        | NM_026614.5 | Mus musculus NADH dehydrogenase (ubiquinone) 1 alpha subcomplex 5 (Ndufa5) mRNA.                               |
| sc0001127.1.28-S                                     | 1.04             | 0.99           | 1.07            | 0.84               | 0.96             | 1.03              | -0.31            | -0.04          | -0.06           | BC003332      | NM_030260.1 | Mus musculus cDNA sequence BC003332 (BC003332) mRNA.                                                           |
| sc0001129.1.2-S                                      | 0.73             | 1.00           | 1.18            | 0.66               | 0.87             | 1.45              | -0.44            | -0.19          | 0.30            | Usp39         | NM_039592.2 | Mus musculus ubiquitin specific protease 39 (Usp39) mRNA.                                                      |
| sc0001146.1.1-S                                      | 1.06             | 1.15           | 0.97            | 0.79               | 1.02             | 0.98              | -0.43            | -0.18          | 0.01            | Tbx1          | NM_007835.1 | Mus musculus thymosin beta 4 (Tbx1) mRNA.                                                                      |
| sc0001150.1.39-S                                     | 0.94             | 1.06           | 1.20            | 0.87               | 0.82             | 1.16              | -0.11            | -0.37          | -0.05           | Tbxas1        | NM_011539   | Mus musculus thrombosane A synthase 1 platelet (Tbxas1) mRNA.                                                  |
| sc0001172.1.55-S                                     | 0.90             | 0.96           | 1.04            | 0.79               | 1.02             | 1.29              | -0.19            | 0.09           | 0.31            | Prse25        | NM_019752.2 | Mus musculus protease serine 25 (Prse25) mRNA.                                                                 |
| sc0001180.1.25-S                                     | 0.88             | 0.98           | 1.15            | 0.75               | 1.00             | 1.43              | -0.22            | 0.03           | 0.31            | 1200009B18Rik | NM_026168.1 | Mus musculus RIKEN cDNA 1200009B18 gene (1200009B18Rik) mRNA.                                                  |
| sc0001236.1.24-S                                     | 0.93             | 1.03           | 1.12            | 0.83               | 0.94             | 1.20              | -0.16            | -0.12          | 0.10            | Dok1          | NM_010070.3 | Mus musculus downstream of tyrosine kinase 1 (Dok1) mRNA.                                                      |
| sc0001256.1.38-S                                     | 0.92             | 1.17           | 1.02            | 0.87               | 1.01             | 1.22              | -0.07            | -0.21          | 0.26            | 4933424B01Rik | NM_138757.1 | Mus musculus RIKEN cDNA 4933424B01 gene (4933424B01Rik) mRNA.                                                  |
| sc0001267.1.72-S                                     | 0.92             | 1.08           | 1.20            | 0.87               | 1.03             | 1.52              | -0.08            | -0.10          | 0.10            | Drg1          | NM_007879.1 | Mus musculus developmentally regulated GTP binding protein 1 (Drg1) mRNA.                                      |
| sc0001280.1.1-S                                      | 0.92             | 1.07           | 1.14            | 0.90               | 0.96             | 1.30              | -0.03            | -0.15          | 0.20            | Pcyt2         | NM_024229.2 | Mus musculus phosphate cytidylyltransferase 2 ethanolamine (Pcyt2) mRNA.                                       |
| sc0001288.1.3-S                                      | 0.92             | 1.13           | 1.21            | 0.78               | 0.94             | 1.22              | -0.25            | -0.26          | 0.01            | 2310033P09Rik | NM_024210.1 | Mus musculus RIKEN cDNA 2310033P09 gene (2310033P09Rik) mRNA.                                                  |
| sc000130.1.11-S                                      | 0.60             | 0.91           | 1.08            | 0.55               | 1.13             | 1.51              | -0.11            | 0.32           | 0.49            | Uros          | NM_009479.1 | Mus musculus uroporphyrinogen III synthase (Uros) mRNA.                                                        |
| sc000131.1.24-S                                      | 1.02             | 1.06           | 1.27            | 0.87               | 0.87             | 1.12              | -0.24            | -0.28          | -0.18           | Erc1          | NM_007948   | Mus musculus excision repair cross-complementing rodent repair deficiency complementation group 1 (Erc1) mRNA. |
| sc0001328.1.1-S                                      | 0.84             | 0.98           | 1.29            | 0.85               | 1.10             | 1.57              | -0.04            | 0.16           | 0.30            | Fanci         | NM_025923.2 | Mus musculus Fanconi anemia complementation group L (Fanci) mRNA.                                              |
| sc0001329.1.110-S                                    | 0.98             | 1.12           | 1.25            | 0.89               | 0.90             | 1.45              | -0.14            | -0.31          | 0.21            | 0610009H04Rik | NM_018854.3 | Mus musculus RIKEN cDNA 0610009H04 gene (0610009H04Rik) mRNA.                                                  |
| sc0001335.1.10-S                                     | 1.00             | 0.95           | 1.23            | 0.87               | 0.89             | 1.45              | -0.20            | -0.25          | 0.23            | BC005682      | NM_030562.2 | Mus musculus cDNA sequence BC005682 (BC005682) mRNA.                                                           |
| sc0001361.1.49-S                                     | 0.92             | 0.99           | 1.32            | 0.81               | 0.88             | 1.39              | -0.33            | -0.16          | 0.39            | 121863        | NM_121863.1 | Mus musculus thymosin beta 4 (Tbx1) mRNA.                                                                      |
| sc0001372.1.16-S                                     | 0.80             | 1.11           | 1.53            | 0.68               | 0.98             | 2.02              | -0.22            | -0.18          | 0.40            | Cik4          | NM_007714.2 | Mus musculus CDC like kinase 4 (Cik4) mRNA.                                                                    |
| sc0001373.1.2-S                                      | 0.72             | 1.00           | 1.45            | 0.64               | 0.97             | 1.77              | -0.16            | -0.05          | 0.29            | Sumo2         | NM_133354   | Mus musculus expressed sequence A1642036 (A1642036) mRNA.                                                      |
| sc0001376.1.1-S                                      | 1.01             | 0.98           | 1.04            | 0.99               | 0.98             | 1.21              | -0.03            | 0.01           | 0.21            | A1642036      | XM_109767.2 | Mus musculus expressed sequence A1642036 (A1642036) mRNA.                                                      |
| sc0001433.1.54-S                                     | 0.91             | 1.08           | 1.19            | 0.80               | 0.84             | 1.53              | -0.19            | -0.19          | -0.36           | Pmc5          | NM_008950.1 | Mus musculus protease (prosome macropain) 26S subunit ATPase 5 (Pmc5) mRNA.                                    |
| sc0001471.1.1-S                                      | 0.95             | 0.95           | 1.13            | 0.87               | 1.00             | 1.35              | -0.13            | 0.08           | 0.25            | Mapk9         | NM_027692.1 | Mus musculus mitogen activated protein kinase 9 (Mapk9) transcript variant 2 mRNA.                             |
| sc0001478.1.0-S                                      | 1.00             | 0.95           | 1.08            | 0.80               | 1.04             | 1.32              | -0.32            | -0.31          | 0.19            | 5730408C10Rik | NM_027445.1 | Mus musculus RIKEN cDNA 5730408C10 gene (5730408C10Rik) mRNA.                                                  |
| sc0001479.1.77-S                                     | 1.00             | 0.99           | 1.11            | 0.85               | 1.15             | 1.15              | -0.23            | 0.20           | 0.05            | Ctsg1         | NM_009013.1 | Mus musculus cysteine G1 (Ctsg1) mRNA.                                                                         |
| sc0001502.1.0-S                                      | 1.06             | 0.93           | 1.27            | 0.78               | 0.79             | 1.18              | -0.44            | -0.24          | -0.10           | Hsp40         | NM_008300.2 | Mus musculus heat shock protein 4 (Hsp40) mRNA.                                                                |
| sc0001519.1.21-S                                     | 1.14             | 0.88           | 1.12            | 0.83               | 0.95             | 1.05              | -0.46            | 0.11           | -0.09           | Syng2         | NM_009304.1 | Mus musculus synaptogyrin 2 (Syng2) mRNA.                                                                      |
| sc000154.1.82-S                                      | 0.87             | 1.06           | 1.36            | 0.74               | 0.94             | 1.49              | -0.23            | -0.16          | 0.13            | Bccip         | NM_025392   | Mus musculus BRCA2 and CDKN1A interacting protein (Bccip) mRNA.                                                |
| sc0001554.1.4-S                                      | 0.63             | 1.02           | 1.20            | 0.55               | 1.01             | 1.50              | -0.19            | -0.01          | 0.32            | Ttk1          | NM_009387   | Mus musculus thymidine kinase 1 (Ttk1) mRNA.                                                                   |
| sc0001574.1.5-S                                      | 1.01             | 1.00           | 1.04            | 0.83               | 0.99             | 1.30              | -0.27            | -0.01          | 0.31            | G3bp          | NM_013716.1 | Mus musculus Ras-GTPase-activating protein SH3-domain binding protein (G3bp) mRNA.                             |
| sc0001587.1.50-S                                     | 0.93             | 0.93           | 1.06            | 0.85               | 1.05             | 1.02              | -0.12            | 0.17           | 0.33            | 5730408C10Rik | NM_027445.1 | Mus musculus RIKEN cDNA 5730408C10 gene (5730408C10Rik) mRNA.                                                  |
| sc000160.1.38-S                                      | 0.80             | 0.99           | 1.21            | 0.77               | 0.98             | 1.60              | -0.22            | -0.01          | 0.40            | 1500016L11Rik | NM_025885.1 | Mus musculus RIKEN cDNA 1500016L11 gene (1500016L11Rik) mRNA.                                                  |
| sc0001607.1.37-S                                     | 0.83             | 0.94           | 1.32            | 0.76               | 1.05             | 1.48              | -0.13            | 0.18           | 0.17            | 2810410M20Rik | NM_024428   | Mus musculus RIKEN cDNA 2810410M20 gene (2810410M20Rik) mRNA.                                                  |
| sc0001621.1.13-S                                     | 0.93             | 1.01           | 1.22            | 0.77               | 1.02             | 1.63              | -0.27            | 0.02           | 0.42            | Tcp1          | NM_013686   | Mus musculus t-complex protein 1 (Tcp1) mRNA.                                                                  |
| sc0001628.1.55-S                                     | 0.87             | 0.97           | 1.14            | 0.83               | 1.02             | 1.42              | -0.07            | 0.09           | 0.32            | Nubp2         | NM_011956.2 | Mus musculus nucleotide binding protein 2 (Nubp2) mRNA.                                                        |
| sc0001637.1.218-S                                    | 0.77             | 1.06           | 1.23            | 0.68               | 0.94             | 1.55              | -0.17            | -0.17          | 0.33            | Luc7l         | NM_025881.1 | Mus musculus Luc7 homolog (S. cerevisiae)-like (Luc7l) mRNA.                                                   |
| sc0001675.1.34-S                                     | 0.83             | 1.04           | 1.22            | 0.94               | 1.00             | 1.46              | -0.17            | -0.20          | 0.26            | Tbp           | NM_013684.1 | Mus musculus TATA box binding protein (Tbp) mRNA.                                                              |
| sc0001697.1.9-S                                      | 0.96             | 1.03           | 1.01            | 0.99               | 0.89             | 1.11              | 0.05             | -0.20          | 0.13            | Sik19         | NM_019442.2 | Mus musculus serine/threonine kinase 19 (Sik19) mRNA.                                                          |
| sc0001715.1.3-S                                      | 0.99             | 0.94           | 1.03            | 0.83               | 1.00             | 1.49              | -0.26            | 0.10           | 0.54            | Bat1a         | NM_019693.2 | Mus musculus HLA-B-associated transcript 1A (Bat1a) mRNA.                                                      |
| sc0001720.1.4-S                                      | 0.54             | 0.96           | 1.14            | 0.51               | 1.01             | 1.74              | -0.07            | 0.09           | 0.60            | Rhag          | NM_011269.1 | Mus musculus Rhesus blood group-associated A glycoprotein (Rhag) mRNA.                                         |
| sc000176.1.12-S                                      | 0.84             | 0.99           | 1.40            | 0.70               | 1.01             | 2.13              | -0.27            | 0.03           | 0.60            | Pama1         | NM_011965   | Mus musculus proteasome (prosome macropain) subunit alpha type 1 (Pama1) mRNA.                                 |
| sc0001779.1.17-S                                     | 0.90             | 1.19           | 1.63            | 0.84               | 0.96             | 2.07              | -0.10            | -0.30          | 0.34            | Eif4a2        | NM_013506   | Mus musculus eukaryotic translation initiation factor 4A2 (Eif4a2) mRNA.                                       |
| sc0001806.1.11-S                                     | 0.94             | 1.00           | 1.12            | 0.84               | 1.06             | 1.46              | -0.16            | 0.08           | 0.38            | Pmm2          | NM_016881   | Mus musculus phosphomannomutase 2 (Pmm2) mRNA.                                                                 |
| sc0001839.1.12-S                                     | 0.89             | 1.06           | 1.27            | 0.81               | 0.96             | 1.43              | -0.12            | -0.14          | 0.18            | 0610037P05Rik | NM_148359.1 | Mus musculus RIKEN cDNA 0610037P05 gene (0610037P05Rik) mRNA.                                                  |
| sc000184.1.1-S                                       | 0.85             | 0.98           | 1.13            | 0.85               | 1.02             | 1.39              | -0.01            | 0.06           | 0.30            | Sec23p        | NM_033749.4 | Mus musculus Sec23 interacting protein (Sec23p) mRNA.                                                          |
| sc0001867.1.58-S                                     | 0.97             | 0.94           | 1.32            | 0.85               | 1.00             | 1.49              | -0.25            | 0.22           | 0.10            | 1500016L11Rik | NM_025885.1 | Mus musculus RIKEN cDNA 1500016L11 gene (1500016L11Rik) mRNA.                                                  |
| sc0001878.1.20-S                                     | 0.99             | 1.01           | 0.99            | 0.93               | 0.84             | 1.14              | -0.08            | -0.27          | 0.21            | Sec222        | NM_133704   | Mus musculus SEC22 vesicle trafficking protein                                                                 |

| Gene Name          | Control<br>18 Hours | Control<br>1 Week | Control<br>4 Weeks | Treatment<br>18 Hours | Treatment<br>1 Week | Treatment<br>4 Weeks | Log2 FC<br>18 Hours | Log2 FC<br>1 Week | Log2 FC<br>4 Weeks | Symbol        | Accession   | Definition                                                                                                                 |
|--------------------|---------------------|-------------------|--------------------|-----------------------|---------------------|----------------------|---------------------|-------------------|--------------------|---------------|-------------|----------------------------------------------------------------------------------------------------------------------------|
| sc0000226.1 3-S    | 0.91                | 0.95              | 1.17               | 0.80                  | 0.99                | 1.31                 | -0.19               | 0.06              | 0.16               | Mrp48         | NM_026971.2 | Mus musculus mitochondrial ribosomal protein L48 (Mrp48) transcript variant 2 mRNA.                                        |
| sc0000227.1 96-S   | 0.94                | 0.97              | 1.14               | 0.83                  | 1.04                | 1.44                 | -0.17               | 0.12              | 0.25               | 2610028L19Rik | NM_027002.1 | Mus musculus RIKEN cDNA 2610028L19 gene (2610028L19Rik) mRNA.                                                              |
| sc0000228.1 35-S   | 0.82                | 1.04              | 1.15               | 0.78                  | 0.96                | 1.41                 | -0.05               | -0.13             | 0.29               | Uboxd4        | NM_145441.2 | Mus musculus UBX domain containing 4 (Uboxd4) mRNA.                                                                        |
| sc0000229.1 1-S    | 0.88                | 1.10              | 1.38               | 0.78                  | 0.96                | 1.59                 | -0.19               | -0.20             | 0.20               | Trappc6b      | XM_172025.2 | Mus musculus trafficking protein particle complex 6B (Trappc6b) mRNA.                                                      |
| sc0000230.1 158-S  | 1.54                | 0.85              | 1.23               | 0.85                  | 0.93                | 1.37                 | -0.14               | -0.13             | 0.21               | Sarpin1a      | NM_025243.3 | Mus musculus serine (or cysteine) proteinase inhibitor class A member 1a (Sarpin1a) mRNA.                                  |
| sc0000230.7 1088-S | 0.95                | 1.09              | 1.24               | 0.88                  | 0.90                | 1.16                 | -0.11               | -0.26             | -0.09              | Rps8ka5       | NM_153587   | Mus musculus ribosomal protein S6 kinase polypeptide 5 (Rps8ka5) mRNA.                                                     |
| sc0000232.4 1-S    | 0.97                | 0.87              | 1.05               | 0.85                  | 0.97                | 1.32                 | -0.18               | 0.00              | 0.32               | Synj2bp       | NM_025292.2 | Mus musculus synaptojanin 2 binding protein (Synj2bp) mRNA.                                                                |
| sc00002340.1 98-S  | 1.07                | 1.01              | 1.06               | 0.88                  | 0.88                | 1.07                 | -0.28               | -0.19             | 0.02               | Nin           | NM_008697   | Mus musculus ninein (Nin) mRNA.                                                                                            |
| sc00002359.1 0-S   | 0.98                | 1.01              | 1.36               | 0.80                  | 0.87                | 1.50                 | -0.30               | -0.22             | 0.14               | Pbef1         | NM_021544.1 | Mus musculus pre-B cell colony-enhancing factor 1 (Pbef1) mRNA.                                                            |
| sc00002367.1 17-S  | 0.72                | 1.05              | 1.34               | 0.75                  | 0.96                | 1.48                 | 0.09                | -0.13             | 0.14               | D12Ertd748e   | NM_144833.1 | Mus musculus DNA segment Chr 12 ERATO Doi 748 expressed (D12Ertd748e) mRNA.                                                |
| sc00002381.1 8-S   | 0.95                | 1.07              | 1.06               | 0.80                  | 0.94                | 1.05                 | -0.26               | -0.19             | 0.00               | Pp2r5e        | NM_012024.1 | Mus musculus protein phosphatase 2 regulatory subunit B (b56) epsilon isoform (Pp2r5e) mRNA.                               |
| sc00002391.1 2-S   | 0.89                | 1.02              | 1.19               | 0.80                  | 0.91                | 1.29                 | -0.14               | -0.13             | 0.10               | Nipnap3b      | NM_026231.2 | Mus musculus nipnap homolog 3B (C. elegans) (Nipnap3b) mRNA.                                                               |
| sc00002403.1 56-S  | 0.96                | 0.92              | 1.24               | 0.84                  | 1.03                | 1.29                 | -0.19               | 0.18              | 0.08               | Scdcp1        | NM_181665.1 | Mus musculus serologically defined colon cancer antigen 1 (Scdcp1) transcript variant 1 mRNA.                              |
| sc00002419.1 9-S   | 0.91                | 1.08              | 1.45               | 0.78                  | 0.94                | 1.49                 | -0.24               | -0.20             | 0.03               | Trappc6b      | BC031464    | Mus musculus trafficking protein particle complex 6B (Trappc6b) mRNA.                                                      |
| sc00002421.1 21-S  | 0.81                | 0.97              | 1.19               | 0.75                  | 0.99                | 1.33                 | -0.10               | 0.04              | 0.17               | Nup50         | NM_016714.2 | Mus musculus nucleoporin 50 (Nup50) mRNA.                                                                                  |
| sc0000245.1 108-S  | 0.95                | 1.09              | 1.19               | 0.90                  | 0.81                | 1.21                 | -0.09               | -0.42             | 0.02               | Irf3          | NM_016849.2 | Mus musculus interferon regulatory factor 3 (Irf3) mRNA.                                                                   |
| sc00002552.1 594-S | 0.95                | 1.11              | 1.18               | 0.80                  | 0.92                | 1.23                 | -0.25               | -0.27             | 0.05               | Triobp        | NM_138579.2 | Mus musculus TRIO and F-actin binding protein (Triobp) mRNA.                                                               |
| sc00002560.1 12-S  | 1.01                | 1.07              | 1.09               | 0.91                  | 0.88                | 1.31                 | -0.14               | -0.27             | 0.26               | O910001A06Rik | NM_144846.2 | Mus musculus RIKEN cDNA O910001A06 gene (O910001A06Rik) mRNA.                                                              |
| sc00002568.1 2-S   | 0.98                | 1.05              | 1.23               | 0.79                  | 0.87                | 1.29                 | -0.32               | -0.27             | 0.07               | Myo1          | NM_021633.1 | Mus musculus myosin I, nonmuscle, class I, myosin 1 (Myo1) mRNA.                                                           |
| sc00002568.1 14-S  | 0.98                | 1.00              | 1.13               | 0.91                  | 1.02                | 1.43                 | -0.11               | 0.02              | 0.34               | C78541        | NM_133800.2 | Mus musculus expressed sequence C78541 (C78541) mRNA.                                                                      |
| sc00002578.1 9-S   | 0.92                | 1.05              | 1.28               | 0.84                  | 0.93                | 1.45                 | -0.14               | -0.18             | 0.19               | Eif36p        | NM_145139.1 | Mus musculus eukaryotic translation initiation factor 3 subunit 6 interacting protein (Eif36p) mRNA.                       |
| sc00002615.1 14-S  | 0.75                | 1.01              | 1.14               | 0.69                  | 0.96                | 1.54                 | -0.12               | -0.08             | 0.45               | Rpa2          | NM_011284.2 | Mus musculus replication protein A2 (Rpa2) mRNA.                                                                           |
| sc00002625.1 41-S  | 0.99                | 0.99              | 1.08               | 0.95                  | 0.97                | 1.24                 | -0.07               | -0.02             | 0.20               | 2210012G02Rik | NM_025617.1 | Mus musculus RIKEN cDNA 2210012G02 gene (2210012G02Rik) mRNA.                                                              |
| sc00002627.1 1-S   | 0.77                | 1.01              | 1.16               | 0.66                  | 0.99                | 1.48                 | -0.21               | -0.03             | 0.35               | Taf12         | BC019668    | Mus musculus TAF12 RNA polymerase II TATA box binding protein (Taf12) mRNA.                                                |
| sc00002631.1 50-S  | 0.88                | 1.02              | 1.28               | 0.79                  | 0.90                | 1.51                 | -0.15               | -0.18             | 0.24               | Eif3s2        | NM_018799.1 | Mus musculus eukaryotic translation initiation factor 3 subunit 2 (beta) (Eif3s2) mRNA.                                    |
| sc00002635.1 13-S  | 0.89                | 0.98              | 1.21               | 0.86                  | 0.92                | 1.11                 | -0.31               | -0.40             | -0.12              | Tpm2          | NM_049416.2 | Mus musculus tropomyosin 2 (Tpm2) mRNA.                                                                                    |
| sc00002658.1 37-S  | 0.82                | 0.98              | 1.24               | 0.85                  | 0.93                | 1.48                 | -0.05               | -0.01             | -0.23              | 1110049F12Rik | NM_025411.2 | Mus musculus RIKEN cDNA 1110049F12 gene (1110049F12Rik) mRNA.                                                              |
| sc00002671.1 55-S  | 0.94                | 1.02              | 1.13               | 0.78                  | 0.88                | 1.32                 | -0.27               | -0.21             | 0.23               | Mrp37         | NM_025500.1 | Mus musculus mitochondrial ribosomal protein L37 (Mrp37) mRNA.                                                             |
| sc00002678.1 34-S  | 0.88                | 0.98              | 1.27               | 0.74                  | 0.98                | 1.35                 | -0.26               | 0.00              | 0.09               | Magoth        | NM_010760.1 | Mus musculus mago-nashi homolog proliferation-associated (Drosophila) (Magoth) mRNA.                                       |
| sc00002680.1 6-S   | 0.92                | 0.98              | 1.21               | 0.72                  | 0.99                | 1.77                 | -0.39               | 0.02              | 0.55               | Naspt1        | NM_011732.1 | Mus musculus nuclease sensitive element binding protein 1 (Naspt1) mRNA.                                                   |
| sc00002692.1 59-S  | 0.99                | 1.01              | 1.17               | 0.89                  | 0.76                | 1.06                 | -0.16               | -0.41             | -0.14              | Galt          | NM_016558.1 | Mus musculus galactose 1-phosphate uridylyl transferase (Galt) mRNA.                                                       |
| sc00002700.1 45-S  | 0.84                | 1.01              | 1.17               | 0.78                  | 1.01                | 1.43                 | -0.11               | 0.00              | 0.30               | Nbn           | NM_013752   | Mus musculus nibrin (Nbn) mRNA.                                                                                            |
| sc00002714.1 3-S   | 0.96                | 1.01              | 1.06               | 0.85                  | 0.86                | 1.64                 | -0.16               | -0.06             | 0.37               | Nipnap3b      | NM_026231.2 | Mus musculus nipnap homolog 3B (C. elegans) (Nipnap3b) mRNA.                                                               |
| sc00002716.1 32-S  | 0.98                | 1.01              | 1.32               | 0.83                  | 0.98                | 1.68                 | -0.24               | -0.19             | 0.24               | Scd4          | NM_013271.2 | Mus musculus sterol carrier domain 4 (Scd4) mRNA.                                                                          |
| sc00002737.1 15-S  | 1.00                | 0.98              | 1.12               | 0.80                  | 0.91                | 1.28                 | -0.33               | -0.11             | 0.19               | Mps15         | NM_025544.1 | Mus musculus mitochondrial ribosomal protein S15 (Mps15) mRNA.                                                             |
| sc00002748.1 8-S   | 0.97                | 1.01              | 1.27               | 0.82                  | 0.88                | 1.48                 | -0.25               | -0.20             | 0.22               | 1110060F11Rik | NM_026395.1 | Mus musculus RIKEN cDNA 1110060F11 gene (1110060F11Rik) mRNA.                                                              |
| sc00002776.1 66-S  | 0.82                | 1.03              | 1.37               | 0.76                  | 0.92                | 1.79                 | -0.12               | -0.16             | 0.40               | Eif3s2        | NM_018799   | Mus musculus eukaryotic translation initiation factor 3 subunit 2 (beta) (Eif3s2) mRNA.                                    |
| sc0000287.1 1-S    | 0.93                | 1.00              | 1.25               | 0.81                  | 0.91                | 1.55                 | -0.20               | -0.14             | 0.32               | A043088       | NM_198613.1 | Mus musculus expressed sequence A043088 (A043088) mRNA.                                                                    |
| sc00002876.1 12-S  | 1.02                | 0.98              | 1.20               | 0.84                  | 0.98                | 1.64                 | -0.28               | -0.01             | 0.46               | Ard1          | NM_019870.1 | Mus musculus N-acetyltransferase ARD1 homolog (X. cerevisiae) (Ard1) mRNA.                                                 |
| sc000029.1 14-S    | 0.91                | 1.00              | 1.10               | 0.88                  | 0.95                | 1.21                 | -0.19               | -0.24             | 0.13               | 9430029K10Rik | NM_026395.1 | Mus musculus RIKEN cDNA 9430029K10 gene (9430029K10Rik) mRNA.                                                              |
| sc00002910.1 314-S | 0.97                | 1.15              | 1.23               | 0.85                  | 0.92                | 1.34                 | -0.19               | 0.32              | 0.10               | Dxlm47e       | NM_207670.1 | Mus musculus DNA segment Chr X, Immune 47 expressed (Dxlm47e) mRNA.                                                        |
| sc00002925.1 82-S  | 0.75                | 1.01              | 1.17               | 0.79                  | 1.01                | 1.38                 | 0.08                | 0.00              | 0.24               | Ftsj          | NM_133991.2 | Mus musculus Ftsj homolog (E. coli) (Ftsj) mRNA.                                                                           |
| sc00002929.1 32-S  | 0.82                | 1.01              | 1.26               | 0.68                  | 0.93                | 1.66                 | -0.26               | -0.12             | 0.40               | 2610029G23Rik | NM_026312.2 | Mus musculus RIKEN cDNA 2610029G23 gene (2610029G23Rik) mRNA.                                                              |
| sc0000299.1 29-S   | 0.90                | 1.05              | 1.29               | 0.73                  | 0.89                | 1.47                 | -0.30               | -0.25             | 0.19               | Eds           | NM_016903.2 | Mus musculus Eds                                                                                                           |
| sc00002992.1 44-S  | 1.03                | 1.02              | 1.07               | 0.99                  | 0.81                | 1.10                 | -0.06               | -0.33             | 0.05               | Lamp2         | NM_010685.2 | Mus musculus lysosomal membrane glycoprotein 2 (Lamp2) mRNA.                                                               |
| sc00002995.1 2-S   | 0.97                | 1.03              | 1.71               | 0.83                  | 1.00                | 2.00                 | -0.23               | -0.05             | 0.23               | Hprt          | NM_013556.1 | Mus musculus hypoxanthine guanine phosphoribosyl transferase (Hprt) mRNA.                                                  |
| sc00002996.1 67-S  | 0.93                | 1.05              | 1.28               | 0.79                  | 0.87                | 1.34                 | -0.23               | -0.27             | 0.08               | Alp2a2        | NM_027439   | Mus musculus ATPase H+ transporting lysosomal accessory protein 2 (Alp2a2) mRNA.                                           |
| sc00003026.1 4A-S  | 0.74                | 1.06              | 1.41               | 0.65                  | 0.95                | 1.85                 | -0.18               | -0.02             | 0.65               | 1210012G02Rik | NM_025617.1 | Mus musculus RIKEN cDNA 1210012G02 gene (1210012G02Rik) mRNA.                                                              |
| sc00003088.1 8-S   | 1.32                | 1.01              | 1.10               | 1.02                  | 0.74                | 0.95                 | -0.38               | -0.45             | -0.21              | Pigs1         | NM_008989.1 | Mus musculus prostaglandin-endoperoxide synthase 1 (Pigs1) mRNA.                                                           |
| sc00003091.1 92-S  | 0.88                | 1.08              | 1.37               | 0.73                  | 0.99                | 1.47                 | -0.27               | -0.13             | 0.10               | Tank          | NM_011529.1 | Mus musculus TRAF family member-associated N-kappa B activator (Tank) mRNA.                                                |
| sc00003092.1 40-S  | 0.74                | 0.95              | 1.20               | 0.60                  | 0.99                | 1.54                 | -0.31               | 0.05              | 0.37               | AF411517.1    | NM_145139.1 | Mus musculus mitotic phosphoprotein 44 mRNA complete cds.                                                                  |
| sc00003132.1 48-S  | 1.00                | 1.00              | 1.00               | 0.94                  | 1.00                | 1.27                 | -0.08               | 0.00              | 0.34               | 0610009I22Rik | NM_025646.2 | Mus musculus RIKEN cDNA 0610009I22 gene (0610009I22Rik) mRNA.                                                              |
| sc00003145.1 1-S   | 0.86                | 0.89              | 1.02               | 0.90                  | 1.04                | 1.30                 | 0.06                | 0.22              | 0.35               | Psm5d         | NM_080554.1 | Mus musculus proteasome (prosome macropain) 26S subunit non-ATPase 5 (Psm5d) mRNA.                                         |
| sc00003163.1 0-S   | 0.83                | 0.91              | 1.12               | 0.73                  | 1.02                | 1.40                 | -0.21               | 0.17              | 0.32               | Mmp19         | NM_019735.2 | Mus musculus monocyte macrophage 19 (Mmp19) mRNA.                                                                          |
| sc00003169.1 64-S  | 0.98                | 0.89              | 1.20               | 0.77                  | 0.89                | 1.71                 | -0.40               | -0.34             | 0.16               | BC0289278     | XM_130699.2 | Mus musculus                                                                                                               |
| sc00003171.1 33-S  | 0.93                | 1.11              | 1.30               | 0.78                  | 0.97                | 1.63                 | -0.26               | -0.20             | 0.33               | Pamb7         | NM_011871.1 | Mus musculus proteasome (prosome macropain) subunit beta type 7 (Pamb7) mRNA.                                              |
| sc00003202.1 259-S | 0.87                | 0.99              | 1.27               | 0.74                  | 0.96                | 1.58                 | -0.24               | -0.02             | 0.32               | Gpiap1        | NM_016739.2 | Mus musculus GPI-anchored membrane protein 1 (Gpiap1) mRNA.                                                                |
| sc00003203.1 308-S | 0.98                | 1.01              | 1.04               | 0.86                  | 0.94                | 1.28                 | -0.18               | -0.11             | 0.30               | 3632413B07Rik | NM_172270.1 | Mus musculus RIKEN cDNA 3632413B07 gene (3632413B07Rik) mRNA.                                                              |
| sc00003216.1 934-S | 0.99                | 1.08              | 1.13               | 0.87                  | 0.87                | 1.19                 | -0.17               | -0.30             | 0.08               | Prkco         | NM_008591.1 | Mus musculus protein kinase C theta (Prkco) mRNA.                                                                          |
| sc00003245.1 6-S   | 0.97                | 1.02              | 1.17               | 0.82                  | 0.88                | 1.38                 | -0.24               | -0.20             | 0.23               | Snag23        | NM_009222.2 | Mus musculus synaptosomal-associated protein 23 (Snag23) mRNA.                                                             |
| sc00003286.1 154-S | 0.94                | 1.07              | 1.16               | 0.90                  | 0.91                | 1.26                 | -0.07               | -0.24             | 0.12               | Edf1          | NM_021519.1 | Mus musculus endothelial differentiation-related factor 1 (Edf1) mRNA.                                                     |
| sc00003305.1 130-S | 0.89                | 0.97              | 1.32               | 0.87                  | 0.94                | 1.74                 | -0.08               | -0.12             | 0.21               | Cesr1         | NM_023549.1 | Mus musculus chromosome segregation 1 like (C. cerevisiae) (Cesr1) mRNA.                                                   |
| sc00003317.1 33-S  | 1.04                | 0.98              | 1.14               | 0.88                  | 0.89                | 1.33                 | -0.23               | -0.15             | 0.23               | Zfp313        | NM_020743.3 | Mus musculus zinc finger protein 313 (Zfp313) mRNA.                                                                        |
| sc00003351.1 17-S  | 1.00                | 1.00              | 1.24               | 0.81                  | 0.90                | 1.42                 | -0.31               | -0.15             | 0.20               | Mkks          | NM_021527.1 | Mus musculus McKusick-Kaufman syndrome protein (Mkks) mRNA.                                                                |
| sc00003356.1 0-S   | 0.94                | 0.97              | 1.21               | 0.86                  | 1.06                | 1.83                 | -0.14               | 0.13              | 0.59               | Mps5          | NM_029963.2 | Mus musculus mitochondrial ribosomal protein S5 (Mps5) mRNA.                                                               |
| sc00003437.1 0-S   | 0.91                | 1.12              | 1.23               | 0.89                  | 0.96                | 1.29                 | -0.03               | -0.22             | 0.07               | Rplp1         | NM_018553.1 | Mus musculus ribosomal protein large P1 (Rplp1) mRNA.                                                                      |
| sc00003468.1 1-S   | 0.91                | 1.06              | 1.17               | 0.92                  | 0.83                | 1.15                 | 0.02                | -0.35             | -0.03              | 0610008A10Rik | NM_026674   | Mus musculus RIKEN cDNA 0610008A10 gene (0610008A10Rik) mRNA.                                                              |
| sc00003542.1 12-S  | 0.83                | 0.98              | 1.34               | 0.74                  | 0.99                | 1.72                 | -0.18               | 0.01              | 0.36               | Sfn           | NM_024233.2 | Mus musculus small fragment nuclease (Sfn) mRNA.                                                                           |
| sc00003562.1 116-S | 0.93                | 0.99              | 1.24               | 0.87                  | 0.99                | 1.58                 | -0.10               | 0.00              | 0.35               | Mrp3          | NM_051359.2 | Mus musculus mitochondrial ribosomal protein L3 (Mrp3) mRNA.                                                               |
| sc00003566.1 10-S  | 0.95                | 1.08              | 1.39               | 0.92                  | 0.94                | 1.74                 | -0.05               | -0.19             | 0.32               | Tbpg1         | NM_025289.1 | Mus musculus transforming growth factor beta regulated gene 1 (Tbpg1) mRNA.                                                |
| sc0000359.1 0-S    | 0.95                | 1.05              | 1.30               | 0.83                  | 0.96                | 1.71                 | -0.19               | -0.14             | 0.40               | 2610018L09Rik | NM_172254.2 | Mus musculus RIKEN cDNA 2610018L09 gene (2610018L09Rik) mRNA.                                                              |
| sc00003591.1 99-S  | 0.93                | 1.09              | 1.34               | 0.78                  | 0.88                | 1.25                 | -0.25               | -0.31             | -0.08              | Keap1         | NM_016679.2 | Mus musculus kelch-like ECH-associated protein 1 (Keap1) mRNA.                                                             |
| sc00003604.1 30-S  | 0.84                | 0.91              | 1.23               | 0.77                  | 1.06                | 1.61                 | -0.13               | 0.22              | 0.39               | Efta          | NM_145615.2 | Mus musculus electron transferring flavoprotein alpha polypeptide (Efta) nuclear gene encoding mitochondrial protein mRNA. |
| sc00003622.1 15-S  | 0.95                | 1.05              | 1.12               | 0.86                  | 0.92                | 1.24                 | -0.15               | -0.20             | 0.15               | Nqo2          | NM_020282.2 | Mus musculus NAD(P)H dehydrogenase quinone 2 (Nqo2) mRNA.                                                                  |
| sc00003623.1 49-S  | 1.01                | 0.99              | 1.02               | 0.95                  | 0.85                | 1.22                 | -0.09               | -0.22             | 0.27               | Pikp          | NM_019703.3 | Mus musculus phosphofructokinase platelet (Pikp) mRNA.                                                                     |
| sc00003638.1 65-S  | 1.02                | 0.94              | 1.14               | 0.84                  | 0.87                | 1.31                 | -0.12               | -0.10             | 0.21               | 2310016C16Rik | NM_027121.2 | Mus musculus RIKEN cDNA 2310016C16 gene (2310016C16Rik) mRNA.                                                              |
| sc00003640.1 4-S   | 0.95                | 1.05              | 1.24               | 0.85                  | 0.95                | 1.44                 | -0.02               | 0.46              | 0.20               | Pap2a         | XM_172457.2 | Mus musculus                                                                                                               |
| sc00003703.1 82-S  | 0.91                | 1.00              | 1.17               | 0.76                  | 1.01                | 1.39                 | -0.27               | 0.01              | 0.25               | Pap2a         | NM_008903.1 | Mus musculus phosphatidic acid phosphatase 2a (Pap2a) mRNA.                                                                |

| Gene Name           | Control<br>18 Hours | Control<br>1 Week | Control<br>4 Weeks | Treatment<br>18 Hours | Treatment<br>1 Week | Treatment<br>4 Weeks | Log2 FC<br>18 Hours | Log2 FC<br>1 Week | Log2 FC<br>4 Weeks | Symbol        | Accession   | Definition                                                                                                                                                     |
|---------------------|---------------------|-------------------|--------------------|-----------------------|---------------------|----------------------|---------------------|-------------------|--------------------|---------------|-------------|----------------------------------------------------------------------------------------------------------------------------------------------------------------|
| sc00003990.1 13-S   | 0.85                | 1.00              | 1.36               | 0.76                  | 1.04                | 1.82                 | -0.16               | 0.06              | 0.42               | Hip2          | NM_016786.2 | Mus musculus huntingtin interacting protein 2 (Hip2) mRNA.                                                                                                     |
| sc00003995.1 47-S   | 0.87                | 1.09              | 1.27               | 0.76                  | 0.95                | 1.67                 | -0.19               | -0.21             | 0.40               | 2610024G14Rik | NM_019366.1 | Mus musculus RIKEN cDNA 2610024G14 gene (2610024G14Rik) mRNA.                                                                                                  |
| sc00004016.1 381-S  | 0.94                | 1.09              | 1.16               | 0.80                  | 0.89                | 1.10                 | -0.23               | -0.29             | -0.07              | Cufl1         | NM_198602.1 | Mus musculus cut-like 1 (Drosophila) (Cufl1) transcript variant 1 mRNA.                                                                                        |
| sc00004021.1 968-S  | 0.82                | 1.02              | 1.14               | 0.70                  | 1.01                | 1.24                 | -0.20               | -0.01             | 0.12               | PHK2b         | NM_025951.1 | Mus musculus phosphatidylinositol 4-kinase type 2 beta (PHK2b) mRNA.                                                                                           |
| sc00004022.1 70-S   | 1.12                | 0.92              | 1.43               | 0.81                  | 0.73                | 1.03                 | -0.30               | -0.35             | 0.13               | Arp21b        | NM_025142.1 | Mus musculus actin related protein 23 complex subunit 18 (Arp21b) mRNA.                                                                                        |
| sc00004026.1 20-S   | 0.96                | 0.92              | 1.02               | 0.91                  | 0.96                | 1.36                 | -0.07               | 0.07              | 0.41               | Hadh3b        | NM_145558   | Mus musculus hydroxyacyl-Coenzyme A dehydrogenase/3-ketacyl-Coenzyme A thiolase/enoyl-Coenzyme A hydratase (trifunctional protein) beta subunit (Hadh3b) mRNA. |
| sc00004030.1 2-S    | 0.96                | 1.04              | 1.14               | 0.86                  | 0.83                | 1.22                 | -0.15               | -0.32             | 0.10               | Arli6p4       | NM_144509.1 | Mus musculus ADP-ribosylation factor-like 6 interacting protein 4 (Arli6p4) mRNA.                                                                              |
| sc00004036.1 27-S   | 0.87                | 1.03              | 1.19               | 0.80                  | 1.00                | 1.34                 | -0.11               | -0.04             | 0.16               | 2010007H12Rik | NM_027421.1 | Mus musculus RIKEN cDNA 2010007H12 gene (2010007H12Rik) mRNA.                                                                                                  |
| sc00004044.1 9-S    | 0.89                | 0.97              | 1.19               | 0.80                  | 0.97                | 1.55                 | -0.16               | -0.01             | 0.39               | Ppplcb        | NM_172707.1 | Mus musculus protein phosphatase 1 catalytic subunit beta isoform (Ppplcb) mRNA.                                                                               |
| sc00004068.1 16-S   | 0.90                | 1.11              | 1.20               | 0.76                  | 0.93                | 1.63                 | -0.24               | -0.25             | 0.44               | 2610024G14Rik | NM_019366.1 | Mus musculus RIKEN cDNA 2610024G14 gene (2610024G14Rik) mRNA.                                                                                                  |
| sc00004092.1 2-S    | 0.95                | 1.20              | 1.04               | 0.86                  | 0.90                | 1.08                 | -0.15               | -0.41             | 0.06               | KHK           | NM_008439.2 | Mus musculus ketohexokinase (KHK) mRNA.                                                                                                                        |
| sc00004104.1 48-S   | 0.95                | 1.04              | 1.13               | 0.83                  | 0.73                | 1.03                 | -0.23               | -0.23             | 0.15               | Ttc11         | NM_023142.1 | Mus musculus tetrahydrogypsite repeat domain 11 (Ttc11) mRNA.                                                                                                  |
| sc00004113.1 27-S   | 1.02                | 1.01              | 1.19               | 0.81                  | 0.87                | 1.41                 | -0.33               | -0.21             | 0.26               | Mrp33         | NM_025796.1 | Mus musculus mitochondrial ribosomal protein L33 (Mrp33) mRNA.                                                                                                 |
| sc00004125.1 0-S    | 0.53                | 0.97              | 1.23               | 0.51                  | 1.02                | 1.73                 | -0.06               | 0.08              | 0.05               | Tyms          | NM_021288.2 | Mus musculus thymidylate synthase (Tyms) mRNA.                                                                                                                 |
| sc00004146.1 45-S   | 0.96                | 1.12              | 1.12               | 0.88                  | 0.88                | 1.35                 | -0.12               | -0.33             | 0.26               | Dhrs8         | NM_053262.2 | Mus musculus dehydrogenase/reductase (SDR family) member 8 (Dhrs8) mRNA.                                                                                       |
| sc00004156.1 115-S  | 0.55                | 0.96              | 1.23               | 0.50                  | 1.06                | 2.29                 | -0.13               | 0.14              | 0.88               | 1600019D15Rik | NM_028975.2 | Mus musculus RIKEN cDNA 1600019D15 gene (1600019D15Rik) mRNA.                                                                                                  |
| sc00004157.1 14-S   | 1.03                | 1.01              | 1.03               | 1.05                  | 0.71                | 1.06                 | 0.03                | -0.50             | 0.07               | Preb          | NM_016703.1 | Mus musculus prolactin regulatory element binding (Preb) mRNA.                                                                                                 |
| sc00004204.1 338-S  | 0.90                | 1.06              | 1.26               | 0.78                  | 0.92                | 1.50                 | -0.19               | -0.21             | 0.26               | Pppl1-3       | NM_009087.1 | Mus musculus RNA polymerase 1-3 (Pppl1-3) mRNA.                                                                                                                |
| sc0000421.1 2-S     | 0.76                | 1.03              | 1.05               | 0.93                  | 1.10                | 1.64                 | -0.23               | 0.11              | 0.54               | Mmp31         | NM_010792.1 | Mus musculus multiple inositol polyphosphate histidine phosphatase 1 (Mmp31) mRNA.                                                                             |
| sc0000468.1 25-S    | 0.95                | 1.00              | 1.16               | 0.87                  | 0.93                | 1.38                 | -0.12               | -0.10             | 0.25               | Mrp43         | NM_053164.2 | Mus musculus mitochondrial ribosomal protein L43 (Mrp43) nuclear gene encoding mitochondrial protein mRNA.                                                     |
| sc0000469.1 48-S    | 1.07                | 0.83              | 1.18               | 0.95                  | 0.96                | 1.23                 | -0.16               | 0.21              | 0.07               | Psal1         | XM_129211.2 | Mus musculus phosphoserine aminotransferase 1 (Psal1) mRNA.                                                                                                    |
| sc0000473.1 5-S     | 0.97                | 1.00              | 1.47               | 0.78                  | 0.87                | 1.70                 | -0.32               | -0.20             | 0.21               | Slc3a2        | NM_008577   | Mus musculus solute carrier family 3 (activators of dibasic and neutral amino acid transport) member 2 (Slc3a2) mRNA.                                          |
| sc0000477.1 15-S    | 0.94                | 1.07              | 1.23               | 0.93                  | 0.90                | 1.32                 | -0.02               | -0.25             | 0.10               | Culc          | NM_025530.1 | Mus musculus peroxiredoxin 5 (Prdx5) mRNA.                                                                                                                     |
| sc0000502.1 59-S    | 1.06                | 1.23              | 0.97               | 1.00                  | 0.94                | 0.89                 | -0.08               | -0.40             | -0.13              | Prdx5         | NM_012021.1 | Mus musculus peroxiredoxin 5 (Prdx5) mRNA.                                                                                                                     |
| sc0000513.1 2582-S  | 0.90                | 1.22              | 1.27               | 0.77                  | 0.95                | 1.29                 | -0.23               | -0.35             | 0.04               | 6030434007Rik | NM_172638.1 | Mus musculus RIKEN cDNA 6030434007 gene (6030434007Rik) mRNA.                                                                                                  |
| sc0000532.1 17-S    | 1.07                | 0.97              | 1.02               | 0.93                  | 0.79                | 1.09                 | -0.20               | -0.29             | 0.01               | Yip1          | NM_019711.1 | Mus musculus Yip1 interacting factor homolog (S. cerevisiae) (Yip1) mRNA.                                                                                      |
| sc0000533.1 30-S    | 1.04                | 0.90              | 0.99               | 1.01                  | 0.76                | 1.18                 | -0.04               | -0.26             | 0.23               | Yif1          | NM_025552.2 | Mus musculus Yip1 interacting factor homolog (S. cerevisiae) (Yif1) mRNA.                                                                                      |
| sc0000534.1 21-S    | 0.90                | 0.99              | 1.30               | 0.75                  | 0.98                | 1.67                 | -0.26               | -0.01             | 0.37               | Pppl1ca       | NM_031868.1 | Mus musculus protein phosphatase 1 catalytic subunit alpha isoform (Pppl1ca) mRNA.                                                                             |
| sc0000572.1 890-S   | 0.90                | 1.05              | 1.22               | 0.77                  | 0.93                | 1.36                 | -0.23               | -0.16             | 0.16               | Cnot7         | NM_011135.2 | Mus musculus CCR4-NOT transcription complex subunit 7 (Cnot7) mRNA.                                                                                            |
| sc0000592.1 8-S     | 1.79                | 1.04              | 0.70               | 1.14                  | 1.03                | 0.90                 | -0.66               | 0.00              | 0.37               | Hp            | NM_017370.1 | Mus musculus haptoglobin (Hp) mRNA.                                                                                                                            |
| sc0000597.1 31-S    | 0.90                | 1.18              | 1.14               | 0.78                  | 0.84                | 1.18                 | -0.31               | -0.49             | 0.05               | Mbp1p         | NM_019709.3 | Mus musculus membrane-bound transcription factor protease site 1 (Mbp1p) mRNA.                                                                                 |
| sc0000600.1 5-S     | 1.08                | 1.01              | 1.02               | 0.94                  | 0.89                | 1.02                 | -0.21               | -0.18             | 0.00               | B230339H12Rik | NM_172282.1 | Mus musculus RIKEN cDNA B230339H12 gene (B230339H12Rik) mRNA.                                                                                                  |
| sc000061.1 10-S     | 1.05                | 0.99              | 1.11               | 0.93                  | 0.88                | 1.00                 | -0.19               | -0.54             | -0.15              | Pppl114a      | NM_010817.1 | Mus musculus protein phosphatase 1 regulatory (inhibitor) subunit 14a (Pppl114a) mRNA.                                                                         |
| sc0000612.1 15-S    | 0.94                | 1.00              | 1.28               | 0.78                  | 0.94                | 1.47                 | -0.27               | -0.13             | 0.13               | Psmf13        | NM_010817.1 | Mus musculus proteasome (prosome) subunit 26S subunit non-ATPase 7 (Psmf13) mRNA.                                                                              |
| sc0000657.1 20-S    | 0.93                | 0.93              | 1.17               | 0.72                  | 1.02                | 1.46                 | -0.37               | 0.14              | 0.32               | Mps31         | NM_020560.1 | Mus musculus mitochondrial ribosomal protein S31 (Mps31) mRNA.                                                                                                 |
| sc0000679.1 109-S   | 1.02                | 1.02              | 1.21               | 0.85                  | 0.91                | 1.34                 | -0.27               | -0.15             | 0.17               | 1810045K07Rik | NM_026432.2 | Mus musculus RIKEN cDNA 1810045K07 gene (1810045K07Rik) mRNA.                                                                                                  |
| sc000071.1 7-S      | 0.91                | 0.96              | 1.14               | 0.79                  | 1.04                | 1.79                 | -0.20               | 0.12              | 0.66               | Psmf13        | NM_011875   | Mus musculus proteasome (prosome) subunit 26S subunit non-ATPase 13 (Psmf13) mRNA.                                                                             |
| sc0000719.1 1-S     | 0.84                | 1.02              | 1.28               | 0.73                  | 0.99                | 1.64                 | -0.22               | -0.04             | 0.35               | 5033428A16Rik | NM_356102.1 | Mus musculus mitochondrial ribosomal protein S31 (Mps31) mRNA.                                                                                                 |
| sc0000735.1 34-S    | 0.88                | 1.01              | 1.19               | 0.84                  | 0.93                | 1.49                 | -0.07               | -0.12             | 0.33               | Mps31         | NM_020560.1 | Mus musculus mitochondrial ribosomal protein S31 (Mps31) mRNA.                                                                                                 |
| sc0000737.1 18-S    | 0.96                | 0.94              | 1.13               | 0.91                  | 0.80                | 1.37                 | -0.08               | -0.08             | 0.29               | Atg16v1d1     | NM_034772.2 | Mus musculus ATPase H <sup>+</sup> transporting V0 subunit D isoform 1 (Atg16v1d1) mRNA.                                                                       |
| sc0000758.1 29-S    | 0.95                | 1.11              | 1.31               | 0.88                  | 0.88                | 1.56                 | -0.23               | -0.58             | 0.22               | Sumo1         | NM_009460.1 | Mus musculus signal transducer and activator of transcription 1 (Sumo1) mRNA.                                                                                  |
| sc0000764.1 2-S     | 0.85                | 1.07              | 1.48               | 0.74                  | 0.97                | 1.79                 | -0.18               | -0.13             | 0.27               | Sumo1         | NM_009460.1 | Mus musculus signal transducer and activator of transcription 1 (Sumo1) mRNA.                                                                                  |
| sc0000794.1 5-S     | 0.84                | 1.12              | 1.38               | 0.72                  | 0.98                | 1.52                 | -0.23               | -0.19             | 0.15               | Tsn           | NM_011650.2 | Mus musculus translin (Tsn) mRNA.                                                                                                                              |
| sc0000796.1 112-S   | 0.99                | 0.99              | 1.05               | 0.88                  | 0.96                | 1.35                 | -0.17               | -0.04             | 0.36               | Atic          | NM_026195.1 | Mus musculus 5-aminimidazole-4-carboxamide ribonucleotide formyltransferase/IMP cyclohydrolase (Atic) mRNA.                                                    |
| sc0000815.1 22-S    | 0.92                | 1.05              | 1.13               | 0.78                  | 0.97                | 1.19                 | -0.23               | -0.11             | 0.07               | Nme7          | NM_138314.1 | Mus musculus non-metastatic cells 7 protein expressed in (Nme7) mRNA.                                                                                          |
| sc0000857.1 11-S    | 0.95                | 1.00              | 1.17               | 0.81                  | 0.78                | 1.38                 | -0.22               | -0.36             | 0.25               | Hsd11b1       | NM_008288.1 | Mus musculus hydroxysteroid 11-beta dehydrogenase 1 (Hsd11b1) mRNA.                                                                                            |
| sc0000872.1 37-S    | 0.91                | 0.92              | 1.14               | 0.83                  | 1.00                | 1.48                 | -0.13               | 0.12              | 0.38               | 2510010F15Rik | NM_026454.2 | Mus musculus RIKEN cDNA 2510010F15 gene (2510010F15Rik) mRNA.                                                                                                  |
| sc000089.1 20-S     | 1.00                | 0.89              | 1.26               | 0.85                  | 0.89                | 1.32                 | -0.15               | -0.13             | 0.15               | Atg16v1d1     | NM_034772.2 | Mus musculus ATPase H <sup>+</sup> transporting V0 subunit D isoform 1 (Atg16v1d1) mRNA.                                                                       |
| sc000090.1 4-S      | 0.79                | 0.94              | 1.12               | 0.73                  | 1.01                | 1.32                 | -0.13               | 0.09              | 0.24               | Sgk3          | NM_177542.2 | Mus musculus serum/glucocorticoid induced kinase 3 (Sgk3) mRNA.                                                                                                |
| sc0000906.1 50-S    | 0.92                | 0.97              | 1.11               | 0.84                  | 0.98                | 1.36                 | -0.14               | 0.01              | 0.31               | Acadl         | NM_007381.2 | Mus musculus acetyl-Coenzyme A dehydrogenase long-chain (Acadl) mRNA.                                                                                          |
| sc0000923.1 16-S    | 0.96                | 1.10              | 1.19               | 0.82                  | 0.86                | 1.29                 | -0.22               | -0.34             | 0.13               | Insig2        | NM_178082.2 | Mus musculus insulin induced gene 2 (Insig2) mRNA.                                                                                                             |
| sc0000928.1 86-S    | 0.98                | 0.99              | 1.02               | 0.88                  | 1.15                | 1.93                 | -0.17               | -0.21             | 0.91               | Hspd1         | NM_010477.2 | Mus musculus heat shock protein 1 (chaperonin) (Hspd1) mRNA.                                                                                                   |
| sc0000941.1 0-S     | 0.92                | 1.03              | 1.24               | 0.84                  | 0.96                | 1.58                 | -0.13               | -0.09             | 0.35               | Ndufs2        | NM_153064.3 | Mus musculus NADH dehydrogenase (ubiquinone) Fe-S protein 2 (Ndufs2) mRNA.                                                                                     |
| sc0000949.1 9-S     | 1.07                | 0.99              | 0.98               | 0.90                  | 1.00                | 1.07                 | -0.26               | 0.02              | 0.13               | Fnt1          | NM_129845.3 | Mus musculus fibronectin 1 (Fnt1) mRNA.                                                                                                                        |
| sc0000968.1 12-S    | 0.91                | 1.01              | 1.15               | 0.81                  | 0.80                | 1.78                 | -0.03               | -0.23             | 0.13               | Uchl5         | NM_019552.2 | Mus musculus ubiquitin carboxyl-terminal esterase L5 (Uchl5) mRNA.                                                                                             |
| sc0000981.1 16-S    | 0.68                | 1.00              | 1.18               | 0.54                  | 1.02                | 1.40                 | -0.34               | 0.05              | 0.26               | Mcm6          | NM_008567.1 | Mus musculus minichromosome maintenance deficient 6 (MSS homolog S. pombe) (S. cerevisiae) (Mcm6) mRNA.                                                        |
| sc0000987.1 58-S    | 1.03                | 0.96              | 1.23               | 0.85                  | 0.73                | 1.06                 | -0.27               | -0.37             | -0.21              | Ifi203        | NM_008328.1 | Mus musculus interferon activated gene 203 (Ifi203) mRNA.                                                                                                      |
| sc0000989.1 15-S    | 0.72                | 1.09              | 1.48               | 0.61                  | 0.96                | 1.82                 | -0.20               | -0.19             | 0.29               | stsy          | U21209      | Mus musculus oxysterol binding protein-like 9 (Oxblp9) mRNA.                                                                                                   |
| sc000100273.2 58-S  | 1.00                | 1.01              | 1.28               | 0.88                  | 0.79                | 1.24                 | -0.18               | -0.34             | -0.05              | Oxblp9        | NM_133885.1 | Mus musculus expressed sequence AU040320 (AU040320) mRNA.                                                                                                      |
| sc000100317.1 138-S | 1.05                | 1.12              | 1.23               | 0.93                  | 0.84                | 1.22                 | -0.17               | -0.40             | 0.00               | AU040320      | NM_133886.1 | Mus musculus expressed sequence AU040320 (AU040320) mRNA.                                                                                                      |
| sc000100532.2 66-S  | 0.91                | 1.13              | 1.19               | 0.81                  | 0.96                | 1.14                 | -0.19               | -0.24             | -0.07              | AA536743      | NM_145923.1 | Mus musculus expressed sequence AA536743 (AA536743) mRNA.                                                                                                      |
| sc000100710.2 138-S | 0.77                | 1.08              | 1.18               | 0.68                  | 0.89                | 1.68                 | -0.13               | -0.17             | 0.16               | Apn1          | NM_175313.3 | Mus musculus apelin receptor-like receptor 1 (Apn1) mRNA.                                                                                                      |
| sc000100986.1 185-S | 0.94                | 1.04              | 1.14               | 0.80                  | 0.80                | 1.06                 | -0.23               | -0.35             | 0.19               | Akap9         | NM_194462.1 | Mus musculus A-kinase (PKA) anchor protein (ytotio) 9 (Akap9) mRNA.                                                                                            |
| sc000102103.1 84-S  | 1.32                | 1.13              | 0.99               | 1.13                  | 0.77                | 0.81                 | -0.22               | -0.54             | -0.28              | Mu1st         | NM_178902.3 | Mus musculus mitochondrial tumor suppressor 1 (Mu1st) mRNA.                                                                                                    |
| sc000104479.1 248-S | 0.80                | 1.24              | 1.36               | 0.64                  | 0.94                | 1.75                 | -0.31               | -0.39             | 0.37               | BC018601      | NM_134033.1 | Mus musculus cDNA sequence BC018601 (BC018601) mRNA.                                                                                                           |
| sc000105348.2 131-S | 0.85                | 1.03              | 1.21               | 0.74                  | 0.96                | 1.47                 | -0.19               | -0.10             | 0.29               | Golph2        | NM_027307.1 | Mus musculus golgi phosphoprotein 2 (Golph2) mRNA.                                                                                                             |
| sc000107029.2 8-S   | 1.03                | 0.96              | 1.04               | 0.79                  | 0.90                | 1.13                 | -0.39               | -0.10             | 0.12               | Me2           | NM_145494.1 | Mus musculus malic enzyme 2 NAD(+)-dependent mitochondrial (Me2) mRNA.                                                                                         |
| sc000107371.2 186-S | 0.92                | 1.11              | 1.44               | 0.74                  | 0.94                | 1.36                 | -0.32               | -0.24             | -0.08              | Sec15f1       | NM_175333.1 | Mus musculus myosin light polypeptide kinase (Myk) mRNA.                                                                                                       |
| sc000107589.1 91-S  | 1.01                | 1.08              | 1.15               | 0.81                  | 0.80                | 1.06                 | -0.33               | -0.39             | 0.13               | Myk           | NM_139300   | Mus musculus protein phosphatase 1 regulatory (inhibitor) subunit 15b (Pppl15b) mRNA.                                                                          |
| sc00010854.2 8-S    | 0.85                | 1.00              | 1.03               | 0.72                  | 1.06                | 1.25                 | -0.24               | 0.08              | 0.28               | Pppl115b      | NM_133819   | Mus musculus prelamin A (Pldn4) mRNA.                                                                                                                          |
| sc000109054.1 86-S  | 0.88                | 0.99              | 1.30               | 0.71                  | 0.97                | 1.32                 | -0.30               | -0.03             | 0.02               | Pldn4         | XM_355370   | Mus musculus prelamin A (Pldn4) mRNA.                                                                                                                          |
| sc000109113.1 250-S | 0.76                | 1.08              | 1.18               | 0.68                  | 0.97                | 1.33                 | -0.17               | -0.16             | 0.18               | Uhrf2         | NM_144873.1 | Mus musculus ubiquitin-like containing PHD and RING finger domains 2 (Uhrf2) mRNA.                                                                             |
| sc000109333.2 94-S  | 0.78                | 0.99              | 1.04               | 0.69                  | 0.99                | 1.34                 | -0.18               | -0.01             | 0.37               | Pkn2          | NM_178654.2 | Mus musculus protein kinase N2 (Pkn2) mRNA.                                                                                                                    |
| sc000110160.1 313-S | 0.72                | 1.09              | 1.07               | 0.65                  | 1.06                | 1.29                 | -0.13               | -0.02             | 0.28               | Tctd3         | NM_011560   | Mus musculus t-complex-associated testis expressed 3 (Tctd3) mRNA.                                                                                             |
| sc000110842.1 108-S | 0.82                | 1.00              | 1.28               | 0.71                  | 0.94                | 1.45                 | -0.21               | -0.10             | 0.18               | EtfA          | NM_145615.2 | Mus musculus electron transferring flavoprotein alpha polypeptide (EtfA) nuclear gene encoding mitochondrial protein mRNA.                                     |
| sc000113026.1 118-S | 0.86                | 1.08              | 1.38               | 0.81                  | 0.86                | 1.34                 | -0.23               | -0.32             | -0.07              | Abi1          | NM_008288.1 | Mus musculus abt-inhibitor 1 (Abi1) mRNA.                                                                                                                      |
| sc000113688.1 129-S | 1.16                | 0.93              | 0.95               | 0.95                  | 0.73                | 1.04                 | -0.28               | -0.40             | -0.01              | Acact1        | NM_130952.1 | Mus musculus acetyl-Coenzyme A acetyltransferase 1 (Acact1) mRNA.                                                                                              |
| sc000114714.2 285-S | 0.85                | 1.06              | 0.95               | 0.88                  | 1.08                | 1.30                 | 0.05                | 0.04              |                    |               |             |                                                                                                                                                                |

| Gene Name           | Control<br>18 Hours | Control<br>1 Week | Control<br>4 Weeks | Treatment<br>18 Hours | Treatment<br>1 Week | Treatment<br>4 Weeks | Log2 FC<br>18 Hours | Log2 FC<br>1 Week | Log2 FC<br>4 Weeks | Symbol        | Accession   | Definition                                                                                                      |
|---------------------|---------------------|-------------------|--------------------|-----------------------|---------------------|----------------------|---------------------|-------------------|--------------------|---------------|-------------|-----------------------------------------------------------------------------------------------------------------|
| scd0012859.2.116-S  | 0.90                | 1.04              | 1.16               | 0.79                  | 0.94                | 1.36                 | -0.19               | -0.15             | 0.22               | Cox5b         | NM_009942.1 | Mus musculus cytochrome c oxidase subunit Vb (Cox5b) mRNA.                                                      |
| scd0012861.1.173-S  | 0.85                | 1.04              | 1.23               | 0.71                  | 0.94                | 1.51                 | -0.25               | -0.14             | 0.29               | Cox6a1        | NM_007748.2 | Mus musculus cytochrome c oxidase subunit VI a polypeptide 1 (Cox6a1) mRNA.                                     |
| scd0012929.2.226-S  | 0.85                | 1.08              | 1.20               | 0.81                  | 0.97                | 1.29                 | -0.06               | -0.15             | 0.11               | Crk1          | NM_007764.2 | Mus musculus v-crk sarcoma virus CT10 oncogene homolog (avian)-like (Crk1) mRNA.                                |
| scd0012946.2.116-S  | 0.94                | 1.14              | 1.43               | 0.74                  | 0.88                | 1.29                 | -0.34               | -0.38             | -0.16              | Crry          | NM_013499.1 | Mus musculus complement receptor related protein (Crry) mRNA.                                                   |
| scd0013030.1.227-S  | 0.83                | 1.08              | 1.37               | 0.77                  | 0.85                | 1.26                 | -0.27               | -0.33             | -0.13              | Csdb          | NM_007388.1 | Mus musculus cathepsin B (Csdb) mRNA.                                                                           |
| scd0013046.1.235-S  | 0.68                | 1.01              | 1.07               | 0.61                  | 1.09                | 1.51                 | -0.17               | 0.10              | 0.50               | Cugbp1        | NM_195853.1 | Mus musculus CUG triplet repeat RNA binding protein 1 (Cugbp1) transcript variant 2 mRNA.                       |
| scd0013548.2.260-S  | 0.74                | 1.06              | 1.17               | 0.58                  | 0.96                | 1.40                 | -0.37               | -0.14             | 0.26               | Dyrk1a        | NM_007890.1 | Mus musculus dual-specificity tyrosine-(Y)-phosphorylation regulated kinase 1a (Dyrk1a) mRNA.                   |
| scd0013589.1.127-S  | 0.92                | 1.01              | 1.28               | 0.77                  | 0.99                | 1.47                 | -0.27               | -0.03             | 0.20               | Mapre1        | NM_007896.2 | Mus musculus microtubule-associated protein RP/EB family member 1 (Mapre1) mRNA.                                |
| scd0013688.1.69-S   | 1.02                | 1.06              | 1.17               | 0.82                  | 0.86                | 1.05                 | -0.32               | -0.28             | -0.16              | Eif4ebp2      | NM_010124.2 | Mus musculus eukaryotic translation initiation factor 4E binding protein 2 (Eif4ebp2) mRNA.                     |
| scd0013822.2.330-S  | 0.95                | 1.02              | 1.32               | 0.91                  | 0.91                | 1.42                 | -0.07               | -0.14             | 0.11               | Epb4.1l2      | NM_013511.1 | Mus musculus erythrocyte protein band 4.1-like 2 (Epb4.1l2) mRNA.                                               |
| scd0014017.1.112-S  | 1.07                | 0.84              | 1.09               | 0.90                  | 0.69                | 1.02                 | -0.27               | -0.30             | -0.10              | Ev22a         | NM_010181.1 | Mus musculus ectotropic viral integration site 2a (Ev22a) mRNA.                                                 |
| scd0014057.2.277-S  | 0.98                | 1.03              | 1.29               | 0.79                  | 0.85                | 1.28                 | -0.23               | -0.20             | 0.13               | Gsa1          | NM_007381.1 | Mus musculus gelsolin 1 (Gsa1) mRNA.                                                                            |
| scd00140740.1.195-S | 1.09                | 0.95              | 1.15               | 0.82                  | 0.83                | 1.10                 | -0.40               | -0.18             | -0.07              | Sec63         | NM_153055.2 | Mus musculus SEC63-like (S. cerevisiae) (Sec63) mRNA.                                                           |
| scd0014455.1.87-S   | 1.00                | 1.01              | 1.31               | 0.92                  | 0.88                | 1.46                 | -0.11               | -0.20             | 0.16               | Gas5          | NM_013525.1 | Mus musculus growth arrest specific 5 (Gas5) mRNA.                                                              |
| scd0014481.1.2-S    | 0.79                | 1.14              | 1.17               | 0.72                  | 0.93                | 1.31                 | -0.13               | -0.29             | 0.18               | Gcap27        |             |                                                                                                                 |
| scd0014571.1.161-S  | 1.04                | 1.00              | 1.12               | 0.81                  | 0.93                | 1.02                 | -0.37               | -0.10             | -0.13              | Gpd2          | NM_010274.2 | Mus musculus glycerol phosphate dehydrogenase 2 mitochondrial (Gpd2) mRNA.                                      |
| scd0014608.2.63-S   | 1.16                | 1.13              | 1.08               | 1.00                  | 0.81                | 0.98                 | -0.23               | -0.47             | -0.15              | Gpr83         | NM_010287.1 | Mus musculus G protein-coupled receptor 83 (Gpr83) mRNA.                                                        |
| scd0014700.2.203-S  | 0.90                | 1.04              | 1.44               | 0.82                  | 0.92                | 1.70                 | -0.14               | -0.17             | 0.24               | Gng10         | NM_025277.1 | Mus musculus guanine nucleotide binding protein (G protein) gamma 10 (Gng10) mRNA.                              |
| scd0014733.2.288-S  | 1.07                | 1.20              | 1.04               | 0.98                  | 0.82                | 0.91                 | -0.12               | -0.54             | -0.21              | Gpc1          | NM_016698.1 | Mus musculus glypican 1 (Gpc1) mRNA.                                                                            |
| scd0014897.1.159-S  | 0.93                | 1.10              | 1.30               | 0.76                  | 0.92                | 1.42                 | -0.29               | -0.26             | 0.12               | Tripl2        | NM_133975.2 |                                                                                                                 |
| scd0014933.2.154-S  | 0.97                | 0.96              | 1.15               | 0.88                  | 0.98                | 1.31                 | -0.15               | 0.03              | 0.19               | Gyk           | NM_008194   | Mus musculus glycerol kinase (Gyk) transcript variant 2 mRNA.                                                   |
| scd0015312.2.169-S  | 0.99                | 1.00              | 1.28               | 0.87                  | 0.87                | 1.43                 | -0.30               | -0.20             | -0.17              | Hmg1          | NM_008251.3 | Mus musculus high mobility group nucleosomal binding domain 1 (Hmg1) mRNA.                                      |
| scd0015381.1.237-S  | 0.88                | 1.01              | 1.23               | 0.77                  | 0.98                | 1.59                 | -0.20               | -0.04             | 0.37               | Hnrpc         | NM_016884.1 | Mus musculus heterogeneous nuclear ribonucleoprotein C (Hnrpc) mRNA.                                            |
| scd0015481.2.296-S  | 0.86                | 1.06              | 1.24               | 0.78                  | 0.96                | 1.32                 | -0.14               | -0.13             | 0.08               | Hspa8         | NM_031165.3 | Mus musculus heat shock protein 8 (Hspa8) mRNA.                                                                 |
| scd0015516.2.144-S  | 0.95                | 0.93              | 1.17               | 0.71                  | 0.96                | 1.84                 | -0.42               | 0.06              | 0.64               | Hspcb         | NM_008302.2 | Mus musculus heat shock protein 1 beta (Hspcb) mRNA.                                                            |
| scd0015588.1.223-S  | 0.88                | 1.02              | 1.28               | 0.70                  | 0.87                | 1.49                 | -0.28               | -0.08             | 0.22               | Elav1         | NM_004852.2 | Mus musculus ELAV1 embryonic lethal abnormal vision Drosophila-like 1 (Hu antigen R) (Elav1) mRNA.              |
| scd0015574.1.224-S  | 0.88                | 1.03              | 1.19               | 0.74                  | 0.95                | 1.27                 | -0.11               | -0.11             | 0.22               | Hus1          | NM_003165.2 | Mus musculus Hus1 homolog (S. pombe) (Hus1) mRNA.                                                               |
| scd0016159.2.68-S   | 1.04                | 1.04              | 1.05               | 0.94                  | 0.83                | 1.06                 | -0.15               | -0.32             | 0.02               | Itih1         | NM_008351.1 | Mus musculus intertekun 12a (Itih1) mRNA.                                                                       |
| scd0016396.1.119-S  | 0.91                | 1.06              | 1.40               | 0.76                  | 0.92                | 1.35                 | -0.26               | -0.21             | -0.05              | Itch          | XM_192925.3 | Mus musculus itchy (Itch) mRNA.                                                                                 |
| scd00170767.2.151-S | 0.89                | 1.04              | 1.22               | 0.75                  | 0.98                | 1.44                 | -0.26               | -0.08             | 0.23               | Rfxap         | NM_133211.1 | Mus musculus regulatory factor X-associated protein (Rfxap) mRNA.                                               |
| scd0017105.1.34-S   | 0.90                | 1.00              | 1.18               | 0.82                  | 0.94                | 1.46                 | -0.14               | -0.10             | 0.32               | Lyzs          | NM_017372.2 | Mus musculus lysozyme (Lyzs) mRNA.                                                                              |
| scd0017289.2.279-S  | 1.01                | 0.92              | 1.43               | 0.85                  | 0.67                | 1.38                 | -0.26               | -0.44             | -0.05              | Merk1         | NM_008587.1 | Mus musculus c-met proto-oncogene tyrosine kinase (Merk1) mRNA.                                                 |
| scd0017675.1.262-S  | 0.76                | 0.98              | 1.20               | 0.67                  | 0.97                | 1.53                 | -0.07               | -0.16             | 0.36               | Myef2         | NM_008582.1 | Mus musculus myelin basic protein expression factor 2 repressor (Myef2) mRNA.                                   |
| scd0017893.1.168-S  | 0.99                | 1.02              | 1.14               | 0.98                  | 0.95                | 1.17                 | -0.31               | -0.29             | -0.11              | Nuf54         | NM_010897.1 | Mus musculus NADH dehydrogenase (ubiquinone) Fe-S protein 4 (Nuf54) mRNA.                                       |
| scd0018099.2.232-S  | 1.01                | 1.03              | 1.15               | 0.86                  | 0.85                | 1.03                 | -0.23               | -0.27             | -0.15              | Nlk           | NM_008702.2 | Mus musculus nemo like kinase (Nlk) mRNA.                                                                       |
| scd0018117.1.185-S  | 0.82                | 1.12              | 1.14               | 0.77                  | 0.89                | 1.18                 | -0.07               | -0.32             | 0.06               | Noc4          | NM_010926.1 | Mus musculus neighbor of Cox4 (Noc4) mRNA.                                                                      |
| scd0018173.2.296-S  | 1.10                | 0.87              | 1.23               | 0.84                  | 0.68                | 1.09                 | -0.41               | -0.35             | -0.18              | Slc11a1       | NM_013612.1 | Mus musculus solute carrier family 11 (proton-coupled divalent metal ion transporters) member 1 (Slc11a1) mRNA. |
| scd0018176.2.194-S  | 1.03                | 1.00              | 1.23               | 0.93                  | 0.85                | 1.19                 | -0.15               | -0.24             | -0.05              | Nras          | NM_010937.1 | Mus musculus neuroblastoma ras oncogene (Nras) mRNA.                                                            |
| scd0018230.2.224-S  | 1.09                | 1.05              | 1.03               | 0.95                  | 0.81                | 1.07                 | -0.19               | -0.38             | 0.05               | Nnn           | NM_008750.2 | Mus musculus nucleoredoxin (Nnn) mRNA.                                                                          |
| scd0018472.1.99-S   | 0.96                | 0.95              | 1.33               | 0.84                  | 0.68                | 1.21                 | -0.32               | -0.28             | -0.10              | Palah1b1      | NM_010918.1 | Mus musculus platelet-activating factor acetylhydrolase isoform 1b beta1 subunit (Palah1b1) mRNA.               |
| scd0018569.1.4-S    | 0.96                | 1.07              | 1.27               | 0.90                  | 0.75                | 0.98                 | -0.13               | -0.08             | 0.13               | Pcds4         | NM_010561.2 | Mus musculus programmed cell death 4 (Pcds4) mRNA.                                                              |
| scd0018642.1.78-S   | 0.67                | 1.08              | 1.20               | 0.59                  | 0.98                | 1.50                 | -0.18               | -0.13             | 0.34               | Pikm          | NM_021514.2 | Mus musculus phosphofructokinase muscle (Pikm) mRNA.                                                            |
| scd0019027.2.109-S  | 0.89                | 1.15              | 1.37               | 0.89                  | 0.86                | 1.45                 | 0.01                | -0.40             | -0.08              | Sypl          | NM_013635.2 | Mus musculus synaptophysin-like protein (Sypl) transcript variant 1 mRNA.                                       |
| scd0019056.2.142-S  | 0.84                | 1.15              | 1.36               | 0.80                  | 0.86                | 1.28                 | -0.08               | -0.42             | -0.08              | Ppp3cb        | NM_008914.1 | Mus musculus protein phosphatase 3 catalytic subunit beta isoform (Ppp3cb) mRNA.                                |
| scd0019108.2.16-S   | 1.00                | 1.08              | 1.32               | 0.86                  | 0.82                | 1.30                 | -0.21               | -0.38             | -0.02              | Prkx          | NM_016979.1 | Mus musculus protein kinase X-linked (Prkx) mRNA.                                                               |
| scd0019186.1.187-S  | 0.95                | 1.03              | 1.36               | 0.71                  | 0.84                | 1.22                 | -0.42               | -0.30             | -0.16              | Psmc1         | NM_011189.1 | Mus musculus proteasome (prosome macropain) 28 subunit alpha (Psmc1) mRNA.                                      |
| scd0019191.1.143-S  | 1.04                | 0.94              | 1.25               | 0.86                  | 0.79                | 1.19                 | -0.27               | -0.23             | -0.06              | Psmc2b        | NM_011191.1 | Mus musculus proteasome (prosome macropain) 28 subunit beta b (Psmc2b) mRNA.                                    |
| scd0019211.1.81-S   | 1.05                | 1.01              | 1.25               | 0.87                  | 0.81                | 1.15                 | -0.26               | -0.10             | 0.16               | Pten          | NM_008988.2 | Mus musculus phosphatidylinositol 3-OH kinase homolog (Pten) mRNA.                                              |
| scd0019212.2.101-S  | 1.13                | 1.01              | 0.97               | 0.96                  | 0.78                | 1.07                 | -0.22               | -0.20             | -0.14              | Pten          | NM_008961.1 | Mus musculus phosphatidylinositol 3-OH kinase homolog (Pten) mRNA.                                              |
| scd0019224.1.106-S  | 1.37                | 0.85              | 1.05               | 1.03                  | 0.60                | 0.93                 | -0.45               | -0.50             | -0.17              | Pigs1         | NM_008969.1 | Mus musculus prostaglandin-endoperoxide synthase 1 (Pigs1) mRNA.                                                |
| scd0019246.2.230-S  | 1.44                | 0.93              | 1.21               | 1.08                  | 0.72                | 0.91                 | -0.46               | -0.36             | -0.42              | Pipn1         | NM_011201.1 | Mus musculus protein tyrosine phosphatase non-receptor type 1 (Pipn1) mRNA.                                     |
| scd0019336.1.63-S   | 1.05                | 1.03              | 1.09               | 0.88                  | 0.85                | 0.96                 | -0.26               | -0.26             | -0.18              | Rab24         | NM_009000.2 | Mus musculus RAB24 member RAS oncogene family (Rab24) mRNA.                                                     |
| scd0019877.2.272-S  | 0.78                | 0.99              | 1.13               | 0.71                  | 1.02                | 1.50                 | -0.15               | 0.04              | 0.41               | Rock1         | NM_009071.1 | Mus musculus Rho-associated coiled-coil forming kinase 1 (Rock1) mRNA.                                          |
| scd0019943.2.84-S   | 0.91                | 1.09              | 1.29               | 0.80                  | 0.92                | 1.35                 | -0.19               | -0.24             | 0.06               | Rp28          | NM_009081.1 | Mus musculus ribosomal protein L28 (Rp28) mRNA.                                                                 |
| scd0020019.1.252-S  | 1.04                | 1.02              | 1.15               | 0.79                  | 0.82                | 1.29                 | -0.38               | -0.33             | -0.06              | Rpl4          | NM_008982.2 | Mus musculus RNA polymerase 1-4 (Rpl4) mRNA.                                                                    |
| scd0020088.2.249-S  | 0.90                | 1.03              | 1.14               | 0.71                  | 0.89                | 1.38                 | -0.34               | -0.23             | 0.28               | Rps24         | NM_011297.2 | Mus musculus ribosomal protein S24 (Rps24) transcript variant 1 mRNA.                                           |
| scd0020218.1.3-S    | 0.99                | 1.06              | 1.24               | 0.85                  | 0.95                | 1.37                 | -0.22               | -0.16             | 0.14               | Khrdb1        | NM_011317.2 | Mus musculus KH domain containing RNA binding signal transduction associated 1 (Khrdb1) mRNA.                   |
| scd0020226.2.49-S   | 0.95                | 1.08              | 1.22               | 0.86                  | 0.98                | 1.38                 | -0.13               | -0.15             | 0.19               | Sars1         | NM_011319.1 | Mus musculus seryl-aminoacyl-tRNA synthetase 1 (Sars1) mRNA.                                                    |
| scd0020340.2.254-S  | 0.97                | 1.10              | 1.23               | 0.77                  | 0.81                | 1.33                 | -0.34               | -0.45             | 0.12               | Glg1          | NM_009149.1 | Mus musculus golgi apparatus protein 1 (Glg1) mRNA.                                                             |
| scd0020378.1.36-S   | 1.13                | 0.90              | 1.13               | 0.95                  | 0.73                | 0.96                 | -0.26               | -0.29             | -0.24              | Frzb          | NM_011356.2 | Mus musculus frizzled-related protein (Frzb) mRNA.                                                              |
| scd0020383.1.163-S  | 0.89                | 1.06              | 1.17               | 0.79                  | 0.96                | 1.30                 | -0.17               | -0.14             | 0.16               | Sfrs3         | NM_013663.3 | Mus musculus splicing factor arginine/serine-rich 3 (Sfrs3) (Sfrs3) mRNA.                                       |
| scd0020567.1.162-S  | 0.99                | 1.09              | 1.28               | 0.80                  | 0.85                | 1.28                 | -0.18               | -0.31             | 0.08               | Sip1          | NM_011413.3 | Mus musculus sex-limited protein (Sip1) mRNA.                                                                   |
| scd0020610.2.127-S  | 0.91                | 1.10              | 1.37               | 0.77                  | 0.95                | 1.66                 | -0.26               | -0.20             | 0.28               | Sumo3         | NM_019969.1 | Mus musculus sex-limited protein (Sip1) mRNA.                                                                   |
| scd0020638.1.79-S   | 0.98                | 0.97              | 1.28               | 0.91                  | 0.98                | 1.72                 | -0.10               | 0.01              | 0.43               | Shnpb         | NM_009225.1 | Mus musculus small nuclear ribonucleoprotein B (Shnpb) mRNA.                                                    |
| scd0020661.1.145-S  | 0.95                | 1.07              | 1.14               | 0.85                  | 0.79                | 1.12                 | -0.16               | -0.44             | -0.01              | Sort1         | NM_019972   | Mus musculus sortilin 1 (Sort1) mRNA.                                                                           |
| scd0020696.1.299-S  | 0.85                | 1.06              | 1.33               | 0.68                  | 0.98                | 1.40                 | -0.32               | -0.11             | 0.09               | Sphk1         | NM_011451.1 | Mus musculus sphingosine kinase 1 (Sphk1) mRNA.                                                                 |
| scd0020832.1.299-S  | 1.03                | 1.03              | 1.09               | 0.88                  | 0.76                | 1.02                 | -0.23               | -0.43             | -0.10              | Ser4          | NM_009279.1 | Mus musculus signal sequence receptor delta (Ser4) mRNA.                                                        |
| scd0020843.2.126-S  | 0.89                | 1.11              | 1.32               | 0.75                  | 0.91                | 1.18                 | -0.26               | -0.28             | -0.16              | Stat2         | NM_021465.2 | Mus musculus stromal antigen 2 (Stat2) mRNA.                                                                    |
| scd0020848.1.188-S  | 1.18                | 0.98              | 1.13               | 0.91                  | 0.81                | 0.97                 | -0.38               | -0.27             | 0.01               | Stat3         | NM_009289.1 | Mus musculus signal transducer and activator of transcription 3 (Stat3) mRNA.                                   |
| scd0020874.2.150-S  | 0.83                | 1.01              | 1.15               | 0.72                  | 1.02                | 1.30                 | -0.20               | 0.02              | 0.18               | SK2           | NM_009289.1 | Mus musculus signal transducer and activator of transcription 3 (Stat3) mRNA.                                   |
| scd0020923.1.202-S  | 0.82                | 1.01              | 1.27               | 0.70                  | 0.86                | 1.60                 | -0.22               | -0.08             | 0.34               | Sup4h2        | NM_011509   | Mus musculus suppressor of Ty 4 homolog 2 (S. cerevisiae) (Sup4h2) mRNA.                                        |
| scd0020928.2.272-S  | 1.12                | 1.06              | 1.03               | 0.92                  | 0.99                | 1.04                 | -0.28               | -0.24             | 0.00               | Abcc9         | NM_011511.1 | Mus musculus ATP-binding cassette sub-family C (CFTR/MRP) member 9 (Abcc9) transcript variant 1 mRNA.           |
| scd00209630.2.217-S | 0.65                | 1.07              | 1.13               | 0.57                  | 0.99                | 1.71                 | -0.19               | -0.10             | 0.59               | Frm4a         | NM_172475.2 |                                                                                                                 |
| scd00210146.1.172-S | 1.00                | 1.04              | 1.19               | 0.82                  | 0.83                | 1.05                 | -0.29               | -0.30             | -0.19              | AF322649      | NM_153134.2 | Mus musculus cDNA sequence AF322649 (AF322649) mRNA.                                                            |
| scd00210529.1.223-S | 0.95                | 1.05              | 1.20               | 0.83                  | 0.84                | 1.27                 | -0.19               | -0.32             | 0.08               | G430022H21Rik | NM_201638.1 | Mus musculus RIKEN cDNA G430022H21 gene (G430022H21Rik) mRNA.                                                   |
| scd0021240.2.257-S  | 0.96                | 1.09              | 1.30               | 0.81                  | 0.85                | 1.26                 | -0.24               | -0.35             | -0.04              | Mapre2        | NM_153052.2 | Mus musculus microtubule-associated protein RP/EB family member 2 (Mapre2) mRNA.                                |
| scd0021365.2.217-S  | 1.04                | 1.02              | 1.05               | 0.85                  | 0.81                | 1.19                 | -0.16               | -0.41             | 0.03               | BC036718      | NM_153135.1 | Mus musculus cDNA sequence BC036718 (BC036718) mRNA.                                                            |
| scd00214063.1.272-S | 1.01                | 0.98              | 1.19               | 0.95                  | 0.75                | 1.11                 | -0.09               | -0.39             | -0.10              | 4732437J24Rik | NM_172338.1 | Mus musculus RIKEN cDNA 4732437J24 gene (4732437J24Rik) mRNA.                                                   |
| scd00214505.2.7-S   | 0.96                | 1.13              | 1.20               | 0.89                  | 0.84                | 1.19                 | -0.11               | -0.43             | -0.01              | AU067744      | NM_172529.1 | Mus musculus expressed sequence AU067744 (AU067744) mRNA.                                                       |
| scd00214764.2.130-S | 0.81                | 1.11              | 1.19               | 0.77                  | 0.96                | 1.26                 | -0.08               | -0.20             | 0.09               | 270005        |             |                                                                                                                 |

| Gene Name           | Control<br>18 Hours | Control<br>1 Week | Control<br>4 Weeks | Treatment<br>18 Hours | Treatment<br>1 Week | Treatment<br>4 Weeks | Log2 FC<br>18 Hours | Log2 FC<br>1 Week | Log2 FC<br>4 Weeks | Symbol         | Accession   | Definition                                                                                                          |
|---------------------|---------------------|-------------------|--------------------|-----------------------|---------------------|----------------------|---------------------|-------------------|--------------------|----------------|-------------|---------------------------------------------------------------------------------------------------------------------|
| sc00223455.2 26-S   | 0.97                | 1.00              | 1.27               | 0.80                  | 0.95                | 1.53                 | -0.28               | -0.06             | 0.27               | F830029L24Rik  | NM_172606.1 | Mus musculus RIKEN cDNA F830029L24 gene (F830029L24Rik) mRNA.                                                       |
| sc00224023.1 141-S  | 1.04                | 1.03              | 1.10               | 0.91                  | 0.85                | 0.99                 | -0.18               | -0.28             | -0.15              | 261031818Rik   | NM_145479   | Mus musculus RIKEN cDNA 261031818 gene (261031818Rik) mRNA.                                                         |
| sc00224105.1 125-S  | 1.03                | 0.99              | 1.01               | 0.92                  | 1.01                | 1.07                 | -0.15               | -0.03             | 0.09               | Pak2           | XM_358817.1 | Mus musculus p21 (CDKN1A)-activated kinase 2 (Pak2) mRNA.                                                           |
| sc00224794.1 18-S   | 0.79                | 1.16              | 1.23               | 0.69                  | 0.91                | 1.37                 | -0.19               | -0.35             | 0.15               | Engp4          | NM_199016.1 | Mus musculus ectonucleotide pyrophosphatase/phosphodiesterase 4 (Engp4) mRNA.                                       |
| sc00224860.2 197-S  | 0.76                | 1.10              | 1.23               | 0.68                  | 0.82                | 1.42                 | -0.15               | -0.35             | 0.21               | Pip2           | NM_011593.1 | Mus musculus phospholipase C-like 2 (Pip2) mRNA.                                                                    |
| sc00224938.2 37-S   | 0.96                | 1.04              | 1.21               | 0.78                  | 0.85                | 1.10                 | -0.31               | -0.30             | -0.14              | Pis2           | NM_144859.1 | Mus musculus pisag 2 RING-H2 motif containing (Pis2) mRNA.                                                          |
| sc00225215.1 56-S   | 1.03                | 0.91              | 1.10               | 0.83                  | 0.91                | 1.63                 | -0.31               | -0.01             | 0.56               | BC003885       | NM_198609   |                                                                                                                     |
| sc00225358.2 258-S  | 0.77                | 1.04              | 1.21               | 0.66                  | 1.01                | 1.33                 | -0.23               | -0.04             | 0.14               | 2610024E20Rik  | NM_146084.1 |                                                                                                                     |
| sc0022591.2 289-S   | 1.04                | 1.16              | 1.03               | 0.95                  | 0.87                | 0.98                 | -0.14               | -0.41             | -0.06              | Xpc            | NM_009531.1 | Mus musculus xeroderma pigmentosum complementation group C (Xpc) mRNA.                                              |
| sc0022608.1 233-S   | 0.97                | 1.02              | 1.23               | 0.79                  | 0.86                | 1.51                 | -0.31               | -0.25             | 0.31               | Nasip1         | NM_011732.1 | Mus musculus nuclease sensitive element binding protein 1 (Nasip1) mRNA.                                            |
| sc00226931.1 117-S  | 0.98                | 1.02              | 1.29               | 0.82                  | 0.82                | 1.16                 | -0.26               | -0.31             | -0.14              | Z500001K11Rik  | NM_146103.1 | Mus musculus RIKEN cDNA Z500001K11 gene (Z500001K11Rik) mRNA.                                                       |
| sc00226968.2 279-S  | 0.90                | 1.07              | 1.23               | 0.83                  | 0.92                | 1.42                 | -0.12               | -0.30             | 0.17               | Zfp162         | NM_011593.1 | Mus musculus zinc finger protein 162 (Zfp162) mRNA.                                                                 |
| sc0022680.1 25-S    | 0.79                | 1.07              | 1.27               | 0.59                  | 0.98                | 1.35                 | -0.41               | -0.13             | 0.08               | Zfp207         | NM_011751.1 | Mus musculus zinc finger protein 207 (Zfp207) mRNA.                                                                 |
| sc0022687.2 83-S    | 1.03                | 1.00              | 1.13               | 0.85                  | 0.90                | 1.06                 | -0.27               | -0.15             | -0.09              | Zfp259         | NM_011752.1 | Mus musculus zinc finger protein 259 (Zfp259) mRNA.                                                                 |
| sc0022722.1 112-S   | 0.96                | 1.05              | 1.18               | 0.87                  | 0.87                | 1.11                 | -0.14               | -0.27             | -0.09              | Zfp64          | NM_009564.1 | Mus musculus zinc finger protein 64 (Zfp64) mRNA.                                                                   |
| sc0022764.1 60-S    | 0.91                | 1.14              | 1.36               | 0.81                  | 0.92                | 1.46                 | -0.17               | -0.31             | 0.11               | Zfx            | NM_011768.1 | Mus musculus zinc finger protein X-linked (Zfx) mRNA.                                                               |
| sc00227743.1 265-S  | 1.01                | 0.96              | 1.10               | 0.82                  | 0.78                | 1.12                 | -0.31               | -0.31             | 0.03               | Mapkap1        | NM_177345.2 | Mus musculus mitogen-activated protein kinase associated protein 1 (Mapkap1) mRNA.                                  |
| sc0022792.2 35-S    | 0.99                | 1.03              | 1.16               | 0.89                  | 0.76                | 1.22                 | -0.15               | -0.43             | 0.08               | Zrf2           | NM_009584   | Mus musculus zotrin related factor 2 (Zrf2) mRNA.                                                                   |
| sc00228095.2 94-S   | 1.00                | 0.95              | 1.01               | 0.98                  | 0.75                | 1.17                 | -0.03               | -0.33             | 0.21               | Spq20          | NM_144955.1 | Mus musculus spastic paraplegia 20 sperin (Troyer syndrome) homolog (human) (Spq20) mRNA.                           |
| sc00228709.2 323-S  | 0.98                | 1.12              | 1.27               | 0.90                  | 0.94                | 1.44                 | -0.12               | -0.23             | 0.19               | Ahcyl1         | NM_145542.2 | Mus musculus S-adenosylhomocysteine hydrolase-like 1 (Ahcyl1) mRNA.                                                 |
| sc00230257.2 191-S  | 0.95                | 1.05              | 1.21               | 0.76                  | 0.93                | 1.10                 | -0.31               | -0.18             | -0.14              | Rod1           | NM_144904.1 | Mus musculus ROD1 regulator of differentiation 1 (S. pombe) (Rod1) mRNA.                                            |
| sc00230648.1 86-S   | 0.94                | 1.16              | 1.20               | 0.82                  | 0.95                | 1.30                 | -0.20               | -0.28             | 0.12               | 4732418C07Rik  | NM_172698.2 | Mus musculus RIKEN cDNA 4732418C07 gene (4732418C07Rik) mRNA.                                                       |
| sc00230709.1 56-S   | 0.93                | 1.06              | 1.07               | 0.85                  | 0.99                | 1.27                 | -0.14               | -0.10             | 0.26               | Zmpste24       | NM_172700.1 | Mus musculus zinc metalloproteinase STE24 homolog (S. cerevisiae) (Zmpste24) mRNA.                                  |
| sc00230815.2 83-S   | 1.02                | 0.99              | 1.05               | 0.86                  | 0.80                | 1.12                 | -0.23               | -0.26             | 0.09               | Man1c1         | NM_207237   | Mus musculus mannosidase alpha class 1C member 1 (Man1c1) mRNA.                                                     |
| sc00231042.2 225-S  | 0.99                | 1.06              | 1.08               | 0.87                  | 0.86                | 1.11                 | -0.19               | -0.30             | 0.05               | Nup2           | NM_153092.1 | Mus musculus nucleoporin like 2 (Nup2) mRNA.                                                                        |
| sc00232087.1 186-S  | 0.92                | 0.99              | 1.09               | 0.87                  | 0.84                | 1.58                 | -0.06               | -0.09             | 0.14               | Mal2a          | NM_145568   | Mus musculus methionine adenosyltransferase II alpha (Mal2a) mRNA.                                                  |
| sc00233410.2 376-S  | 0.86                | 1.08              | 1.32               | 0.77                  | 0.98                | 1.32                 | -0.16               | -0.27             | 0.01               | Zfp692         | NM_178707.2 | Mus musculus zinc finger protein 692 (Zfp692) mRNA.                                                                 |
| sc00233908.1 1058-S | 0.97                | 1.00              | 1.18               | 0.82                  | 0.74                | 1.16                 | -0.23               | -0.44             | -0.02              | Fus            | NM_139149.1 | Mus musculus fusion derived from 112:16 malignant liposarcoma (human) (Fus) mRNA.                                   |
| sc00236790.1 87-S   | 0.74                | 1.03              | 1.12               | 0.67                  | 0.98                | 1.39                 | -0.14               | -0.06             | 0.31               | 6330505F04Rik  | NM_172779.1 | Mus musculus RIKEN cDNA 6330505F04 gene (6330505F04Rik) mRNA.                                                       |
| sc0023802.2 62-S    | 0.79                | 1.03              | 1.29               | 0.69                  | 0.92                | 1.53                 | -0.21               | -0.17             | 0.25               | Amfr           | NM_011787.1 | Mus musculus autocrine motility factor receptor (Amfr) mRNA.                                                        |
| sc0023807.1 130-S   | 0.88                | 1.08              | 1.28               | 0.78                  | 0.88                | 1.40                 | -0.18               | -0.30             | 0.13               | Arlh2          | NM_011790.2 | Mus musculus ariadne homolog 2 (Drosophila) (Arlh2) mRNA.                                                           |
| sc0023821.2 49-S    | 1.10                | 1.07              | 1.12               | 0.95                  | 0.77                | 1.02                 | -0.21               | -0.46             | -0.13              | Bac61          | NM_011792.3 | Mus musculus beta-site APP cleaving enzyme 1 (Bac61) mRNA.                                                          |
| sc0023981.1 86-S    | 1.00                | 1.02              | 1.31               | 0.85                  | 0.89                | 1.28                 | -0.23               | -0.21             | 0.04               | E430034L04Rik  | NM_161612   | Mus musculus RIKEN cDNA E430034L04 gene (E430034L04Rik) mRNA.                                                       |
| sc0023989.2 9-S     | 1.03                | 1.02              | 1.03               | 0.88                  | 0.98                | 1.22                 | -0.19               | -0.21             | 0.11               | Gp220          | NM_020015.1 | Mus musculus general transcription factor II h polypeptide 12 (Gp220) mRNA.                                         |
| sc0023950.1 557-S   | 1.00                | 1.00              | 1.36               | 0.86                  | 0.97                | 1.66                 | -0.21               | -0.04             | 0.28               | Dnaib6         | NM_011847.1 | Mus musculus DnaI (Hsp40) homolog subfamily B member 6 (Dnaib6) mRNA.                                               |
| sc0024030.2 121-S   | 0.96                | 1.07              | 1.21               | 0.87                  | 0.92                | 1.58                 | -0.12               | -0.21             | 0.39               | Mrps12         | NM_011885.2 | Mus musculus mitochondrial ribosomal protein S12 (Mrps12) mRNA.                                                     |
| sc0024116.2 231-S   | 0.83                | 1.06              | 1.22               | 0.75                  | 0.94                | 1.36                 | -0.16               | -0.17             | 0.16               | Whsc2          | NM_011914.1 | Mus musculus Wolf-Hirschhorn syndrome candidate 2 (human) (Whsc2) mRNA.                                             |
| sc0024135.1 295-S   | 0.87                | 1.09              | 1.22               | 0.75                  | 0.89                | 1.19                 | -0.22               | -0.30             | -0.04              | Zfp68          | NM_013844.1 | Mus musculus zinc finger protein 68 (Zfp68) mRNA.                                                                   |
| sc00242083.1 302-S  | 0.80                | 1.20              | 1.16               | 0.72                  | 0.95                | 1.16                 | -0.16               | -0.41             | 0.01               | Ppm11          | NM_178726.1 | Mus musculus protein phosphatase 1 (formerly 2C)-like (Ppm11) mRNA.                                                 |
| sc00242297.2 152-S  | 0.93                | 1.14              | 1.10               | 0.94                  | 0.79                | 1.16                 | -0.01               | -0.51             | 0.07               | 1700012H17Rik  | NM_173425.1 | Mus musculus RIKEN cDNA 1700012H17 gene (1700012H17Rik) mRNA.                                                       |
| sc00242821.1 200-S  | 0.94                | 1.01              | 1.15               | 0.90                  | 0.98                | 1.43                 | -0.08               | -0.04             | 0.15               | C530050C022Rik | NM_173425.1 | Mus musculus RIKEN cDNA C530050C022 gene (C530050C022Rik) mRNA.                                                     |
| sc00242887.2 177-S  | 1.11                | 1.08              | 1.06               | 0.95                  | 0.78                | 1.00                 | -0.23               | -0.45             | -0.09              | Wast2          | NM_153423.3 | Mus musculus WAS protein family member 2 (Wast2) mRNA.                                                              |
| sc00243819.2 7-S    | 0.93                | 1.16              | 1.11               | 0.82                  | 0.87                | 1.03                 | -0.19               | -0.42             | -0.10              | B430201G11Rik  | NM_172894.2 | Mus musculus RIKEN cDNA B430201G11 gene (B430201G11Rik) mRNA.                                                       |
| sc00245688.1 91-S   | 0.99                | 0.92              | 0.93               | 0.98                  | 1.08                | 1.12                 | -0.03               | 0.24              | 0.26               | Rbbp7          | NM_009031.2 | Mus musculus retinoblastoma binding protein 7 (Rbbp7) mRNA.                                                         |
| sc00246064.2 74-S   | 0.85                | 1.08              | 1.13               | 0.72                  | 0.97                | 1.20                 | -0.23               | -0.15             | 0.09               | Cdk8           | NM_181570.1 | Mus musculus cyclin-dependent kinase 8 (Cdk8) transcript variant 1 mRNA.                                            |
| sc00246451.1 182-S  | 0.89                | 1.07              | 1.28               | 0.77                  | 0.93                | 1.53                 | -0.21               | -0.20             | 0.27               | Rpl27a         | NM_011975.2 | Mus musculus ribosomal protein L27a (Rpl27a) mRNA.                                                                  |
| sc00246830.2 51-S   | 0.92                | 1.11              | 1.10               | 0.81                  | 0.95                | 1.38                 | -0.18               | -0.23             | 0.33               | 1110064P04Rik  | NM_172391.2 | Mus musculus RIKEN cDNA 1110064P04 gene (1110064P04Rik) mRNA.                                                       |
| sc00246866.1 142-S  | 0.98                | 1.04              | 1.03               | 0.83                  | 0.94                | 1.04                 | -0.24               | -0.31             | 0.21               | Copeb7         | NM_012032.2 | Mus musculus histone H4 (H4b) mRNA.                                                                                 |
| sc00246895.1 34-S   | 0.98                | 1.02              | 1.13               | 0.82                  | 0.99                | 1.20                 | -0.25               | -0.15             | 0.09               | Copeb7         | NM_172374.1 | Mus musculus CDP9 (constitutive photomorphogenesis) homolog subunit 7b (Arabidopsis thaliana) (Cops7b) mRNA.        |
| sc00246903.2 105-S  | 0.97                | 1.04              | 1.34               | 0.79                  | 0.93                | 1.27                 | -0.29               | -0.15             | -0.08              | 2610304F09Rik  | NM_172965.1 | Mus musculus RIKEN cDNA 2610304F09 gene (2610304F09Rik) mRNA.                                                       |
| sc00246919.2 296-S  | 0.97                | 1.15              | 1.19               | 0.79                  | 0.94                | 1.03                 | -0.30               | -0.28             | -0.20              | Zfp346         | NM_012017.1 | Mus musculus zinc finger protein 346 (Zfp346) mRNA.                                                                 |
| sc00246982.2 253-S  | 1.04                | 1.05              | 1.15               | 0.91                  | 0.89                | 1.04                 | -0.20               | -0.22             | -0.13              | Golga3         | NM_008146.3 | Mus musculus golgi autoantigen golgin subfamily a 3 (Golga3) mRNA.                                                  |
| sc00270096.1 196-S  | 1.03                | 0.96              | 1.14               | 0.99                  | 0.94                | 1.19                 | -0.04               | -0.03             | 0.06               | 5033413H12Rik  | NM_173015.1 | Mus musculus RIKEN cDNA 5033413H12 gene (5033413H12Rik) mRNA.                                                       |
| sc0027050.1 101-S   | 0.87                | 1.08              | 1.35               | 0.72                  | 0.99                | 1.55                 | -0.29               | -0.12             | 0.20               | Hps3           | NM_012052.1 | Mus musculus ribosomal protein S3 (Hps3) mRNA.                                                                      |
| sc0027057.2 200-S   | 0.86                | 1.07              | 1.30               | 0.72                  | 0.86                | 1.72                 | -0.02               | -0.40             | 0.04               | Nco44          | NM_012054.1 | Mus musculus nucleolar receptor coactivator 4 (Nco44) mRNA.                                                         |
| sc0027364.1 305-S   | 0.96                | 1.02              | 1.15               | 0.90                  | 0.78                | 1.17                 | -0.10               | -0.38             | -0.05              | Srr1           | NM_013761.2 | Mus musculus serine racemase (Srr) mRNA.                                                                            |
| sc0027374.2 29-S    | 1.01                | 1.03              | 1.20               | 0.86                  | 0.92                | 1.40                 | -0.24               | -0.17             | 0.23               | Skb1           | NM_013768.1 | Mus musculus SKB1 homolog (S. pombe) (Skb1) mRNA.                                                                   |
| sc0027376.2 9-S     | 1.09                | 0.99              | 1.04               | 0.94                  | 0.83                | 1.15                 | -0.21               | -0.26             | 0.15               | Slc25a10       | NM_013770.1 | Mus musculus solute carrier family 25 (mitochondrial carrier; dicarboxylate transporter) member 10 (Slc25a10) mRNA. |
| sc0027407.2 100-S   | 0.85                | 0.93              | 1.05               | 0.78                  | 1.05                | 1.39                 | -0.12               | 0.18              | 0.40               | Abcf2          | NM_013853.1 | Mus musculus ATP-binding cassette sub-family F (GCN20) member 2 (Abcf2) mRNA.                                       |
| sc0027407.2 308-S   | 0.92                | 1.05              | 1.22               | 0.78                  | 0.85                | 1.21                 | -0.23               | -0.31             | 0.00               | Abcf2          | NM_013853.1 | Mus musculus ATP-binding cassette sub-family F (GCN20) member 2 (Abcf2) mRNA.                                       |
| sc0027556.1 128-S   | 0.93                | 1.08              | 1.19               | 0.87                  | 0.86                | 1.35                 | -0.09               | -0.34             | 0.18               | Erf3a8         | NM_016876.2 | Mus musculus eukaryotic translation initiation factor 3 subunit 4 (delta) (Erf3a8) mRNA.                            |
| sc0027599.2 240-S   | 1.01                | 1.24              | 1.38               | 0.89                  | 0.75                | 1.18                 | -0.18               | -0.48             | 0.19               | DBP10776e      | NM_138591.3 | Mus musculus DNA segment Chr 1 ERATO Doi 161 expressed (D1Ertid161e) mRNA.                                          |
| sc00278185.2 104-S  | 1.02                | 1.07              | 1.34               | 0.79                  | 0.81                | 1.10                 | -0.38               | -0.41             | -0.27              | Tomm70a        | NM_138599.2 | Mus musculus Tom70a                                                                                                 |
| sc0028200.2 26-S    | 0.86                | 0.99              | 1.18               | 0.77                  | 0.98                | 1.38                 | -0.15               | -0.03             | 0.23               | Dhrs4          | NM_030686.1 | Mus musculus dehydrogenase/reductase (SDR family) member 4 (Dhrs4) mRNA.                                            |
| sc0029819.2 92-S    | 0.98                | 0.99              | 1.22               | 0.82                  | 0.78                | 1.12                 | -0.24               | -0.35             | -0.12              | Stau2          | NM_025303.1 | Mus musculus stauflin (RNA binding protein) homolog 2 (Drosophila) (Stau2) mRNA.                                    |
| sc0029871.2 145-S   | 0.88                | 1.20              | 1.20               | 0.75                  | 0.90                | 1.22                 | -0.23               | -0.42             | 0.03               | Scmh1          | NM_013883.1 | Mus musculus sex comb on midleg homolog 1 (Scmh1) mRNA.                                                             |
| sc0029875.2 286-S   | 1.12                | 1.04              | 1.18               | 0.94                  | 0.73                | 0.99                 | -0.27               | -0.50             | -0.24              | Iggap1         | NM_016721.1 | Mus musculus IQ motif containing GTPase activating protein 1 (Iggap1) mRNA.                                         |
| sc00302019.1 62-S   | 0.99                | 0.97              | 1.09               | 0.93                  | 0.97                | 1.25                 | -0.09               | 0.00              | 0.21               | Hook3          | NM_207659   | Mus musculus hook homolog 3 (Drosophila) (Hook3) mRNA.                                                              |
| sc00303032.2 0-S    | 0.64                | 1.03              | 1.17               | 0.47                  | 1.04                | 1.87                 | -0.46               | 0.00              | 0.70               | Hs444          | NM_175652.1 | Mus musculus histone H4 (H4b) mRNA.                                                                                 |
| sc00304087.1 23-S   | 0.97                | 0.99              | 1.13               | 0.86                  | 0.98                | 1.39                 | -0.16               | -0.02             | 0.30               | D930036F22Rik  | NM_177171.3 | Mus musculus RIKEN cDNA D930036F22 gene (D930036F22Rik) mRNA.                                                       |
| sc00305058.1 241-S  | 0.80                | 0.98              | 1.12               | 0.71                  | 1.00                | 1.37                 | -0.18               | 0.03              | 0.29               | B430218L07Rik  | NM_198037.1 | Mus musculus RIKEN cDNA B430218L07 gene (B430218L07Rik) mRNA.                                                       |
| sc00306011.1 109-S  | 0.87                | 1.08              | 1.34               | 0.73                  | 0.97                | 1.55                 | -0.25               | -0.15             | 0.22               | 9230101K24Rik  | NM_177206   | Mus musculus RIKEN cDNA 9230101K24 gene (9230101K24Rik) mRNA.                                                       |
| sc00308371.1 6-S    | 1.00                | 1.04              | 1.14               | 0.87                  | 0.94                | 1.03                 | -0.21               | -0.14             | -0.14              | A730011L01Rik  | NM_177394.2 | Mus musculus RIKEN cDNA A730011L01 gene (A730011L01Rik) mRNA.                                                       |
| sc00303190.2 28-S   | 0.83                | 1.02              | 1.29               | 0.76                  | 0.99                | 1.61                 | -0.13               | -0.04             | 0.33               | AA517853       | NM_153799.1 | Mus musculus expressed sequence AA517853 (AA517853) mRNA.                                                           |
| sc00308752.1 280-S  | 0.96                | 1.09              | 1.18               | 0.85                  | 0.94                | 1.11                 | -0.18               | -0.21             | -0.08              | Tssc1          | NM_201357.1 | Mus musculus tumor suppressing subtransferable candidate 1 (Tssc1) mRNA.                                            |
| sc00308773.1 71-S   | 0.97                | 1.02              | 1.20               | 0.81                  | 0.77                | 0.91                 | -0.27               | -0.17             | 0.29               | 1610035L17Rik  | NM_168484.1 |                                                                                                                     |
| sc00309402.2 107-S  | 1.07                | 0.94              | 1.23               | 0.87                  | 0.74                | 1.07                 | -0.29               | -0.42             | 0.20               | Usp10          | NM_016492   |                                                                                                                     |
| sc0050778.2 103-S   | 0.89                | 1.49              | 1.65               |                       |                     |                      |                     |                   |                    |                |             |                                                                                                                     |

| Gene Name         | Control<br>18 Hours | Control<br>1 Week | Control<br>4 Weeks | Treatment<br>18 Hours | Treatment<br>1 Week | Treatment<br>4 Weeks | Log2 FC<br>18 Hours | Log2 FC<br>1 Week | Log2 FC<br>4 Weeks | Symbol        | Accession   | Definition                                                                                      |
|-------------------|---------------------|-------------------|--------------------|-----------------------|---------------------|----------------------|---------------------|-------------------|--------------------|---------------|-------------|-------------------------------------------------------------------------------------------------|
| sc0056505.1_79-S  | 0.93                | 0.91              | 1.02               | 0.80                  | 1.01                | 1.56                 | -0.20               | 0.16              | 0.61               | Ruvb1         | NM_019685.1 | Mus musculus RuvB-like protein 1 (Ruvb1) mRNA.                                                  |
| sc0056722.2_11-S  | 1.05                | 1.00              | 1.12               | 0.84                  | 0.68                | 1.12                 | -0.32               | -0.52             | 0.00               | Ltla1         | NM_019980.1 | Mus musculus LPS-induced TN factor (Ltla1) mRNA.                                                |
| sc0057247.1_172-S | 0.89                | 1.13              | 1.19               | 0.88                  | 0.98                | 1.19                 | -0.02               | -0.19             | 0.00               | Zfp276        | NM_020497.1 | Mus musculus zinc finger protein (C2H2 type) 276 (Zfp276) mRNA.                                 |
| sc0057259.2_60-S  | 0.91                | 1.16              | 1.32               | 0.80                  | 0.87                | 1.24                 | -0.18               | -0.42             | -0.10              | Tob2          | NM_020507.2 | Mus musculus transducer of ERBB2 2 (Tob2) mRNA.                                                 |
| sc0057674.1_280-S | 0.94                | 1.08              | 1.32               | 0.76                  | 0.95                | 1.44                 | -0.30               | -0.14             | 0.15               | AW742319      | NM_021453.1 | Mus musculus expressed sequence AW742319 (AW742319) mRNA.                                       |
| sc0057875.2_106-S | 1.17                | 1.09              | 0.92               | 0.97                  | 0.57                | 1.03                 | -0.28               | -0.90             | 0.17               | Angptl4       | NM_020581.1 | Mus musculus angiotensin-like 4 (Angptl4) mRNA.                                                 |
| sc0058996.1_51-S  | 0.73                | 1.04              | 1.16               | 0.62                  | 0.95                | 1.33                 | -0.23               | -0.13             | 0.21               | 4933428G20Rik | NM_021493.1 | Mus musculus RIKEN cDNA 4933428G20 gene (4933428G20Rik) mRNA.                                   |
| sc0059001.2_73-S  | 0.87                | 1.04              | 1.07               | 0.77                  | 1.04                | 1.38                 | -0.16               | -0.01             | 0.36               | Pole3         | NM_021498.2 | Mus musculus polymerase (DNA directed) epsilon 3 (p17 subunit) (Pole3) mRNA.                    |
| sc0059042.1_160-S | 0.97                | 1.04              | 1.08               | 0.93                  | 0.77                | 1.04                 | -0.05               | -0.42             | -0.07              | Cope          | NM_021598.1 | Mus musculus costomer protein complex subunit epsilon (Cope) mRNA.                              |
| sc0060365.1_251-S | 0.98                | 1.05              | 1.18               | 0.86                  | 0.88                | 1.31                 | -0.19               | -0.26             | 0.16               | Rbm8          | NM_025675.1 | Mus musculus RNA binding motif protein 8 (Rbm8) mRNA.                                           |
| sc0060617.2_269-S | 1.07                | 1.01              | 1.13               | 0.88                  | 0.94                | 1.28                 | -0.08               | -0.08             | 0.18               | Pes1          | NM_025889.2 | Mus musculus pescadillo homolog 1 containing BRC domain (zebrafish) (Pes1) mRNA.                |
| sc0061111.1_63-S  | 0.91                | 1.01              | 1.23               | 0.78                  | 0.95                | 1.27                 | -0.21               | -0.10             | 0.15               | Dna3          | NM_025931.2 | Mus musculus DNA replication protein 3 (Dna3) mRNA.                                             |
| sc0065973.1_101-S | 0.93                | 1.06              | 1.23               | 0.81                  | 0.90                | 1.23                 | -0.19               | -0.24             | 0.00               | Asph          | NM_023066.1 | Mus musculus aspartate beta-hydroxylase (Asph) mRNA.                                            |
| sc0066039.2_47-S  | 1.15                | 0.97              | 1.06               | 1.07                  | 0.78                | 0.92                 | -0.20               | -0.29             | -0.20              | D14Ertd449e   | NM_025311.1 | Mus musculus DNA segment Chr 14 ERATO Dcl 449 expressed (D14Ertd449e) mRNA.                     |
| sc0066052.1_175-S | 0.97                | 1.02              | 1.28               | 0.87                  | 0.93                | 1.42                 | -0.16               | -0.13             | 0.15               | Sdhc          | NM_025321.1 | Mus musculus succinate dehydrogenase complex subunit C integral membrane protein (Sdhc) mRNA.   |
| sc0066105.2_66-S  | 0.85                | 1.12              | 1.21               | 0.82                  | 0.93                | 1.31                 | -0.06               | -0.27             | 0.11               | Ube2d3        | NM_025356.2 | Mus musculus ubiquitin-conjugating enzyme E2D 3 (UBC4/5 homolog yeast) (Ube2d3) mRNA.           |
| sc0066119.2_58-S  | 1.00                | 1.03              | 1.23               | 0.84                  | 0.89                | 1.55                 | -0.26               | -0.20             | 0.34               | 1110002E23Rik | NM_025365.2 | Mus musculus RIKEN cDNA 1110002E23 gene (1110002E23Rik) mRNA.                                   |
| sc0066161.2_296-S | 1.09                | 0.96              | 1.06               | 0.93                  | 0.79                | 1.00                 | -0.23               | -0.29             | -0.08              | Pop4          | NM_025390.2 | Mus musculus processing of precursor 4 ribonuclease P/MRP family (S. cerevisiae) (Pop4) mRNA.   |
| sc0066190.1_159-S | 1.01                | 1.03              | 1.23               | 0.78                  | 0.84                | 1.35                 | -0.38               | -0.28             | 0.08               | Phc3          | NM_025408.1 | Mus musculus phycoerythrin-related protein 3 (Phc3) mRNA.                                       |
| sc0066212.1_0-S   | 0.97                | 1.07              | 1.25               | 0.90                  | 0.84                | 1.34                 | -0.12               | -0.34             | 0.10               | Sec61b        | NM_024171.1 | Mus musculus Sec61 beta subunit (Sec61b) mRNA.                                                  |
| sc0066225.1_2-S   | 0.93                | 1.05              | 1.30               | 0.79                  | 0.93                | 1.53                 | -0.24               | -0.18             | 0.23               | 1190005P17Rik | NM_025431.2 | Mus musculus RIKEN cDNA 1190005P17 gene (1190005P17Rik) mRNA.                                   |
| sc0066226.1_62-S  | 0.98                | 0.97              | 1.28               | 0.84                  | 0.95                | 1.51                 | -0.21               | -0.02             | 0.23               | Trapp2        | NM_025432   | Mus musculus trafficking protein particle complex 2 (Trapp2) mRNA.                              |
| sc0066291.2_269-S | 0.98                | 1.07              | 1.24               | 0.88                  | 0.90                | 1.16                 | -0.15               | -0.25             | -0.08              | 1810030N24Rik | NM_025471.1 | Mus musculus RIKEN cDNA 1810030N24 gene (1810030N24Rik) mRNA.                                   |
| sc0066310.1_231-S | 0.82                | 1.03              | 1.25               | 0.75                  | 0.99                | 1.47                 | -0.17               | -0.07             | 0.23               | 2810410M20Rik | NM_024482.2 | Mus musculus RIKEN cDNA 2810410M20 gene (2810410M20Rik) mRNA.                                   |
| sc0066350.2_276-S | 0.84                | 1.15              | 1.29               | 0.82                  | 0.99                | 1.38                 | 0.00                | -0.20             | 0.13               | Plag212a      | NM_023196.2 | Mus musculus phospholipase A2 group X1A (Plag212a) mRNA.                                        |
| sc0066395.1_89-S  | 0.74                | 0.94              | 0.88               | 1.19                  | 0.91                | 0.82                 | 1.13                | -0.19             | -0.27              | 2310015N07Rik | NM_025515.1 | Mus musculus RIKEN cDNA 2310015N07 gene (2310015N07Rik) mRNA.                                   |
| sc0066371.1_24-S  | 0.96                | 1.11              | 1.19               | 0.80                  | 0.95                | 1.27                 | -0.27               | -0.09             | 0.19               | Nduf5         | NM_025523.1 | Mus musculus NADH dehydrogenase (ubiquinone) 1 subcomplex unknown 1 (Nduf5) mRNA.               |
| sc0066408.1_304-S | 1.03                | 1.08              | 1.15               | 0.95                  | 0.83                | 1.11                 | -0.12               | -0.37             | -0.05              | Appt          | NM_025545.2 | Mus musculus apertaxin (Appt) mRNA.                                                             |
| sc0066421.2_54-S  | 0.95                | 1.07              | 1.29               | 0.79                  | 0.85                | 1.23                 | -0.27               | -0.33             | -0.07              | 2410004B18Rik | NM_025555.1 | Mus musculus RIKEN cDNA 2410004B18 gene (2410004B18Rik) mRNA.                                   |
| sc0066432.1_29-S  | 0.97                | 1.04              | 1.23               | 0.82                  | 0.83                | 1.13                 | -0.24               | -0.31             | -0.11              | 2010007L18Rik | XM_134478.7 | Mus musculus RIKEN cDNA 2010007L18 gene (2010007L18Rik) mRNA.                                   |
| sc0066511.2_56-S  | 0.94                | 1.08              | 1.15               | 0.95                  | 0.93                | 1.29                 | 0.00                | -0.20             | 0.17               | 2500003M10Rik | NM_023215.3 | Mus musculus RIKEN cDNA 2500003M10 gene (2500003M10Rik) mRNA.                                   |
| sc0066586.2_90-S  | 0.99                | 1.00              | 1.15               | 0.90                  | 0.91                | 1.35                 | -0.15               | -0.14             | 0.24               | 0610009I22Rik | NM_025646.2 | Mus musculus RIKEN cDNA 0610009I22 gene (0610009I22Rik) mRNA.                                   |
| sc0066601.1_237-S | 0.96                | 1.09              | 1.22               | 0.84                  | 0.95                | 1.30                 | -0.20               | -0.11             | 0.20               | 5730555F13Rik | NM_025690.1 | Mus musculus RIKEN cDNA 5730555F13 gene (5730555F13Rik) mRNA.                                   |
| sc0066607.1_25-S  | 0.97                | 1.03              | 1.27               | 0.84                  | 0.97                | 1.36                 | -0.21               | -0.16             | 0.18               | 2610528C02Rik | NM_025692.1 | Mus musculus RIKEN cDNA 2610528C02 gene (2610528C02Rik) mRNA.                                   |
| sc0066706.2_314-S | 0.97                | 1.08              | 1.14               | 0.78                  | 0.91                | 1.26                 | -0.31               | -0.24             | 0.15               | 4733401H18Rik | NM_023247.2 | Mus musculus RIKEN cDNA 4733401H18 gene (4733401H18Rik) mRNA.                                   |
| sc0066775.2_265-S | 1.09                | 1.10              | 1.17               | 0.93                  | 0.92                | 1.02                 | -0.23               | -0.24             | -0.21              | 4933428I03Rik | NM_025760.2 | Mus musculus RIKEN cDNA 4933428I03 gene (4933428I03Rik) mRNA.                                   |
| sc0066789.2_21-S  | 0.89                | 0.99              | 1.15               | 0.74                  | 0.98                | 1.41                 | -0.26               | -0.01             | 0.29               | 5430428G01Rik | NM_024171.1 | Mus musculus RIKEN cDNA 5430428G01 gene (5430428G01Rik) mRNA.                                   |
| sc0066875.1_121-S | 0.83                | 1.06              | 1.28               | 0.71                  | 1.01                | 1.63                 | -0.23               | -0.07             | 0.35               | 1200016B10Rik | NM_020016.1 | Mus musculus RIKEN cDNA 1200016B10 gene (1200016B10Rik) mRNA.                                   |
| sc0066882.1_105-S | 1.00                | 0.99              | 1.32               | 0.75                  | 0.91                | 1.33                 | -0.42               | -0.13             | 0.01               | Bzw1          | NM_025824.2 | Mus musculus basic leucine zipper and W2 domains 1 (Bzw1) mRNA.                                 |
| sc0066970.1_28-S  | 0.83                | 0.98              | 1.18               | 0.79                  | 0.90                | 1.52                 | -0.19               | -0.03             | 0.03               | Sabap2        | NM_025835.1 | Mus musculus single-stranded DNA binding protein 2 (Sabap2) mRNA.                               |
| sc0066980.1_296-S | 0.86                | 1.08              | 1.19               | 0.80                  | 0.95                | 1.24                 | -0.18               | -0.26             | 0.07               | 1500004N11Rik | NM_025886.2 | Mus musculus RIKEN cDNA 1500004N11 gene (1500004N11Rik) mRNA.                                   |
| sc0066999.2_129-S | 0.87                | 1.15              | 1.34               | 0.76                  | 0.82                | 1.39                 | -0.21               | -0.50             | 0.05               | 1500003D12Rik | NM_025895.2 | Mus musculus RIKEN cDNA 1500003D12 gene (1500003D12Rik) mRNA.                                   |
| sc0067064.2_260-S | 0.91                | 1.13              | 1.29               | 0.80                  | 0.94                | 1.29                 | -0.19               | -0.26             | 0.01               | 2810405I11Rik | NM_024190.1 | Mus musculus RIKEN cDNA 2810405I11 gene (2810405I11Rik) mRNA.                                   |
| sc0067072.1_237-S | 0.92                | 1.14              | 1.25               | 0.76                  | 0.91                | 1.19                 | -0.28               | -0.32             | -0.07              | Cdc37         | NM_025950.1 | Mus musculus RIKEN cDNA 2810405I11 gene (2810405I11Rik) mRNA.                                   |
| sc0067074.2_293-S | 0.99                | 1.07              | 1.23               | 0.87                  | 0.82                | 1.31                 | -0.18               | -0.36             | 0.09               | 2610528C02Rik | NM_153395.1 | Mus musculus RIKEN cDNA 2610528C02 gene (2610528C02Rik) mRNA.                                   |
| sc0067125.2_158-S | 1.10                | 0.94              | 1.10               | 0.93                  | 0.86                | 1.31                 | -0.24               | -0.13             | 0.25               | Sas           | NM_025982.1 | Mus musculus sarcoma amplified sequence (Sas) mRNA.                                             |
| sc0067150.2_45-S  | 0.95                | 1.02              | 1.05               | 0.87                  | 0.98                | 1.22                 | -0.17               | -0.05             | 0.22               | Rnt1a1        | NM_025999.1 | Mus musculus ring finger protein 141 (Rnt1a1) mRNA.                                             |
| sc0067163.1_100-S | 0.96                | 1.05              | 1.05               | 0.85                  | 0.95                | 1.44                 | -0.16               | -0.13             | 0.13               | 10204L23Rik   | NM_026041.1 | Mus musculus RIKEN cDNA 10204L23 gene (10204L23Rik) mRNA.                                       |
| sc0067184.2_306-S | 0.98                | 1.03              | 1.17               | 0.81                  | 0.92                | 1.25                 | -0.14               | -0.16             | 0.10               | Grim19        | NM_023312.1 | Mus musculus genes associated with retinoid-IFN-induced mortality 19 (Grim19) mRNA.             |
| sc0067203.2_205-S | 0.73                | 1.03              | 1.23               | 0.66                  | 0.96                | 1.52                 | -0.14               | -0.10             | 0.31               | Nde1          | NM_023317.1 | Mus musculus nuclear distribution gene E homolog 1 (A. nidulans) (Nde1) mRNA.                   |
| sc0067226.2_87-S  | 0.97                | 1.14              | 1.28               | 0.90                  | 0.90                | 1.30                 | -0.10               | -0.32             | 0.04               | Tmem19        | NM_133683.1 | Mus musculus transmembrane protein 19 (Tmem19) mRNA.                                            |
| sc0067236.2_173-S | 0.99                | 1.08              | 1.22               | 0.87                  | 0.97                | 1.32                 | -0.19               | -0.15             | 0.12               | 2810452K22Rik | NM_026048.1 | Mus musculus RIKEN cDNA 2810452K22 gene (2810452K22Rik) mRNA.                                   |
| sc0067246.1_211-S | 0.90                | 1.08              | 1.27               | 0.72                  | 0.97                | 1.11                 | -0.34               | -0.16             | 0.19               | 2810474O19Rik | XM_132966.3 | Mus musculus RIKEN cDNA 2810474O19 gene (2810474O19Rik) mRNA.                                   |
| sc0067273.2_306-S | 0.91                | 0.99              | 1.12               | 0.78                  | 0.91                | 1.30                 | -0.22               | -0.14             | 0.21               | Ndufa10       | NM_024197.1 | Mus musculus NADH dehydrogenase (ubiquinone) 1 alpha subcomplex 10 (Ndufa10) mRNA.              |
| sc0067443.1_283-S | 0.95                | 1.13              | 1.28               | 0.86                  | 0.95                | 1.36                 | -0.30               | -0.15             | 0.20               | Map1c3b       | NM_026136.1 | Mus musculus microtubule-associated protein 1 light chain 3 beta (Map1c3b) mRNA.                |
| sc0067665.1_200-S | 0.93                | 1.12              | 1.27               | 0.90                  | 0.91                | 1.26                 | -0.05               | -0.29             | -0.02              | Dctn4         | NM_026302.2 | Mus musculus dynactin 4 (Dctn4) mRNA.                                                           |
| sc0067673.1_322-S | 0.90                | 1.02              | 1.19               | 0.76                  | 0.95                | 1.31                 | -0.24               | -0.11             | 0.13               | Tob2          | NM_026305.1 | Mus musculus transcription elongation factor B (SII) polypeptide 2 (Tob2) mRNA.                 |
| sc0067684.1_211-S | 0.72                | 1.10              | 1.24               | 0.61                  | 0.89                | 1.27                 | -0.24               | -0.31             | 0.04               | 3300001P08Rik | NM_026313.1 | Mus musculus RIKEN cDNA 3300001P08 gene (3300001P08Rik) mRNA.                                   |
| sc0067723.2_24-S  | 0.93                | 1.04              | 1.17               | 0.66                  | 0.76                | 1.07                 | -0.12               | -0.46             | -0.13              | 4933415G12Rik | NM_026399.1 | Mus musculus RIKEN cDNA 4933415G12 gene (4933415G12Rik) mRNA.                                   |
| sc0067857.2_151-S | 0.81                | 1.06              | 1.28               | 0.68                  | 0.92                | 1.43                 | -0.26               | -0.22             | 0.16               | Ppp6c         | NM_024209.1 | Mus musculus protein phosphatase 6 catalytic subunit (Ppp6c) mRNA.                              |
| sc0067876.2_53-S  | 0.64                | 0.97              | 1.10               | 0.51                  | 1.01                | 1.79                 | -0.31               | -0.05             | 0.70               | 1600019D15Rik | NM_026975.2 | Mus musculus RIKEN cDNA 1600019D15 gene (1600019D15Rik) mRNA.                                   |
| sc0067899.2_250-S | 0.93                | 1.02              | 1.19               | 0.80                  | 0.95                | 1.09                 | -0.18               | -0.42             | 0.14               | 201010K16Rik  | NM_026116.1 | Mus musculus RIKEN cDNA 201010K16 gene (201010K16Rik) mRNA.                                     |
| sc0067948.1_302-S | 0.92                | 1.06              | 1.21               | 0.86                  | 0.95                | 1.26                 | -0.10               | -0.16             | 0.06               | Fbw2b         | NM_175127.1 | Mus musculus RIKEN cDNA 2010110K16 gene (2010110K16Rik) mRNA.                                   |
| sc0067958.1_275-S | 0.88                | 1.03              | 1.25               | 0.76                  | 0.95                | 1.37                 | -0.23               | -0.11             | 0.14               | 2610101N10Rik | NM_026476.1 | Mus musculus RIKEN cDNA 2610101N10 gene (2610101N10Rik) mRNA.                                   |
| sc0067974.2_124-S | 0.93                | 1.15              | 1.38               | 0.83                  | 0.95                | 1.28                 | -0.17               | -0.28             | -0.10              | 5730405I09Rik | NM_026484.2 | Mus musculus RIKEN cDNA 5730405I09 gene (5730405I09Rik) mRNA.                                   |
| sc0068018.2_104-S | 1.00                | 1.01              | 1.16               | 0.90                  | 0.96                | 1.19                 | -0.14               | -0.08             | 0.04               | Col4a3bp      | NM_023420.1 | Mus musculus procollagen type IV alpha 3 (Goodpasture antigen) binding protein (Col4a3bp) mRNA. |
| sc0068033.1_52-S  | 0.90                | 1.07              | 1.26               | 0.82                  | 0.92                | 1.63                 | -0.14               | -0.22             | 0.37               | 2810437L13Rik | NM_019980.1 | Mus musculus RIKEN cDNA 2810437L13 gene (2810437L13Rik) mRNA.                                   |
| sc0068145.2_4-S   | 0.79                | 1.10              | 1.23               | 0.61                  | 0.96                | 1.43                 | -0.38               | -0.20             | 0.22               | 5730466H23Rik | NM_026576.1 | Mus musculus RIKEN cDNA 5730466H23 gene (5730466H23Rik) mRNA.                                   |
| sc0068198.2_271-S | 0.94                | 1.14              | 1.19               | 0.80                  | 0.99                | 1.07                 | -0.23               | -0.10             | 0.15               | Ndufb2        | NM_026612.1 | Mus musculus NADH dehydrogenase (ubiquinone) 1 beta subcomplex 2 (Ndufb2) mRNA.                 |
| sc0068202.1_15-S  | 0.97                | 0.99              | 1.20               | 0.84                  | 0.99                | 1.67                 | -0.22               | -0.01             | 0.47               | Ndufa5        | NM_026614.1 | Mus musculus NADH dehydrogenase (ubiquinone) 1 alpha subcomplex 5 (Ndufa5) mRNA.                |
| sc0068377.2_268-S | 0.97                | 1.01              | 1.22               | 0.77                  | 0.84                | 1.28                 | -0.31               | -0.27             | 0.08               | 0610041G09Rik | NM_183274   | Mus musculus RIKEN cDNA 0610041G09 gene (0610041G09Rik) mRNA.                                   |
| sc0068379.1_280-S | 0.91                | 1.06              | 1.24               | 0.81                  | 0.84                | 1.16                 | -0.18               | -0.33             | -0.08              | Ciz1          | NM_028412.1 | Mus musculus CDKN1A interacting zinc finger protein 1 (Ciz1) mRNA.                              |
| sc0068607.2_14-S  | 1.08                | 1.05              | 0.98               | 0.99                  | 0.80                | 0.98                 | -0.13               | -0.40             | 0.00               | Serhi         | NM_023475.2 | Mus musculus serine hydrolase-like (Serhi) mRNA.                                                |
| sc0068796.2_313-S | 0.96                | 1.00              | 1.09               | 1.03                  | 0.81                | 1.12                 | -0.10               | -0.28             | 0.05               | 1110039B18Rik | NM_144525.1 | Mus musculus RIKEN cDNA 1110039B18 gene (1110039B18Rik) mRNA.                                   |
| sc0068857.1_14    |                     |                   |                    |                       |                     |                      |                     |                   |                    |               |             |                                                                                                 |

| Gene Name           | Control<br>18 Hours | Control<br>1 Week | Control<br>4 Weeks | Treatment<br>18 Hours | Treatment<br>1 Week | Treatment<br>4 Weeks | Log2 FC<br>18 Hours | Log2 FC<br>1 Week | Log2 FC<br>4 Weeks | Symbol        | Accession   | Definition                                                                                                                  |
|---------------------|---------------------|-------------------|--------------------|-----------------------|---------------------|----------------------|---------------------|-------------------|--------------------|---------------|-------------|-----------------------------------------------------------------------------------------------------------------------------|
| scd0074006.2_261-S  | 0.91                | 1.01              | 1.15               | 0.80                  | 0.95                | 1.30                 | -0.18               | -0.08             | 0.18               | Dnm1l         | NM_152816.1 | Mus musculus dynamin 1-like (Dnm1l) mRNA.                                                                                   |
| scd0074167.1_70-S   | 0.75                | 1.00              | 1.25               | 0.67                  | 1.01                | 1.51                 | -0.17               | -0.02             | 0.28               | Nud9          | NM_028794.2 | Mus musculus nudix (nucleoside diphosphate linked moiety X)-type motif 9 (Nud9) mRNA.                                       |
| scd0074302.1_179-S  | 1.00                | 1.03              | 1.16               | 0.90                  | 0.92                | 1.29                 | -0.14               | -0.16             | 0.15               | Mtm3          | NM_028860.1 | Mus musculus myotubularin related protein 3 (Mtm3) mRNA.                                                                    |
| scd0074383.1_273-S  | 0.99                | 1.05              | 1.21               | 0.88                  | 0.84                | 1.13                 | -0.16               | -0.32             | -0.08              | Ubaq2         | NM_028475.1 |                                                                                                                             |
| scd0074602.2_54-S   | 0.85                | 0.87              | 1.19               | 0.85                  | 0.87                | 1.55                 | -0.16               | -0.11             | 0.35               | Taf12a3P18Rik | NM_028917.7 |                                                                                                                             |
| scd0075089.2_74-S   | 1.01                | 1.03              | 1.17               | 0.88                  | 0.86                | 1.04                 | -0.20               | -0.26             | -0.17              | E230041M21Rik | NM_029166.1 | Mus musculus RIKEN cDNA E230041M21 gene (E230041M21Rik) mRNA.                                                               |
| scd0075613.2_301-S  | 0.96                | 1.07              | 1.09               | 0.82                  | 0.86                | 1.06                 | -0.24               | -0.31             | -0.03              | 2610034E13Rik | NM_029365.1 | Mus musculus RIKEN cDNA 2610034E13 gene (2610034E13Rik) mRNA.                                                               |
| scd0075826.2_162-S  | 0.80                | 1.07              | 1.19               | 0.69                  | 0.94                | 1.17                 | -0.21               | -0.18             | -0.02              | Serp2         | NM_029457.2 | Mus musculus SUMO/sentrin specific protease 2 (Serp2) mRNA.                                                                 |
| scd0075901.2_135-S  | 0.96                | 1.07              | 1.26               | 0.82                  | 0.92                | 1.12                 | -0.23               | -0.21             | -0.17              | Mitc1         | NM_133761.2 | Mus musculus MAD homolog 4 interacting transcription coactivator 1 (Mitc1) mRNA.                                            |
| scd0075914.1_304-S  | 1.11                | 0.99              | 1.12               | 0.97                  | 0.78                | 0.99                 | -0.20               | -0.34             | -0.16              | Sect152       | XM_355790.9 |                                                                                                                             |
| scd0075991.1_191-S  | 1.11                | 1.10              | 1.19               | 0.89                  | 0.86                | 1.03                 | -0.32               | -0.34             | -0.21              | 5033405K12Rik | NM_153567.1 | Mus musculus RIKEN cDNA 5033405K12 gene (5033405K12Rik) mRNA.                                                               |
| scd0076281.1_330-S  | 1.03                | 0.98              | 1.21               | 0.88                  | 0.89                | 1.13                 | -0.23               | -0.33             | -0.09              | Taf12a3       | NM_028917.7 |                                                                                                                             |
| scd0076369.2_42-S   | 0.96                | 1.01              | 1.09               | 0.80                  | 0.93                | 1.12                 | -0.26               | -0.12             | -0.03              | 2810012L14Rik | NM_029581.1 | Mus musculus RIKEN cDNA 2810012L14 gene (2810012L14Rik) mRNA.                                                               |
| scd0076497.2_72-S   | 1.01                | 1.00              | 1.21               | 0.87                  | 0.76                | 1.24                 | -0.21               | -0.40             | 0.03               | Ppp1r11       | NM_029632.1 | Mus musculus protein phosphatase 1 regulatory (inhibitor) subunit 11 (Ppp1r11) mRNA.                                        |
| scd0076608.2_255-S  | 0.91                | 1.10              | 1.08               | 0.88                  | 0.76                | 1.04                 | -0.05               | -0.54             | -0.05              | 1700064K09Rik | NM_175244.2 | Mus musculus RIKEN cDNA 1700064K09 gene (1700064K09Rik) mRNA.                                                               |
| scd0076824.1_187-S  | 1.00                | 1.01              | 1.24               | 0.84                  | 0.76                | 1.24                 | -0.26               | -0.41             | -0.00              | 2410166I05Rik | NM_029759.2 | Mus musculus RIKEN cDNA 2410166I05 gene (2410166I05Rik) mRNA.                                                               |
| scd0076846.1_142-S  | 0.80                | 1.07              | 1.31               | 0.71                  | 0.87                | 1.40                 | -0.18               | -0.30             | 0.10               | 3010033P07Rik | NM_029767.1 |                                                                                                                             |
| scd0076890.1_191-S  | 0.74                | 0.95              | 1.21               | 0.65                  | 1.00                | 1.60                 | -0.16               | -0.07             | 0.41               | 0610016J10Rik | NM_133771.1 | Mus musculus RIKEN cDNA 0610016J10 gene (0610016J10Rik) mRNA.                                                               |
| scd0077062.2_44-S   | 0.86                | 1.08              | 1.20               | 0.78                  | 0.92                | 1.38                 | -0.15               | -0.23             | 0.21               | 5930412E23Rik | NM_173632.4 | Mus musculus RIKEN cDNA 5930412E23 gene (5930412E23Rik) mRNA.                                                               |
| scd0077480.1_264-S  | 1.06                | 1.01              | 1.24               | 0.83                  | 0.85                | 1.08                 | -0.35               | -0.25             | -0.20              | C33002119Rik  | XM_126866.5 |                                                                                                                             |
| scd0077877.1_184-S  | 0.87                | 1.13              | 1.37               | 0.75                  | 0.92                | 1.27                 | -0.20               | -0.29             | -0.10              | 6030458C11Rik | XM_127971.4 | Mus musculus RIKEN cDNA 6030458C11 gene (6030458C11Rik) mRNA.                                                               |
| scd0078825.1_275-S  | 0.95                | 1.03              | 1.16               | 0.81                  | 0.81                | 1.11                 | -0.22               | -0.34             | -0.05              | 5830417C01Rik | NM_024262.2 | Mus musculus RIKEN cDNA 5830417C01 gene (5830417C01Rik) mRNA.                                                               |
| scd0080285.2_59-S   | 0.95                | 1.12              | 1.50               | 0.86                  | 0.86                | 1.40                 | -0.15               | -0.38             | -0.10              | BC003281      | NM_030253.1 | Mus musculus cDNA sequence BC003281 (BC003281) mRNA.                                                                        |
| scd0080898.1_95-S   | 1.05                | 0.98              | 1.11               | 0.91                  | 0.76                | 1.04                 | -0.21               | -0.36             | -0.09              | Arls1         | NM_030711.2 | Mus musculus type 1 tumor necrosis factor receptor shedding aminopeptidase regulator (Arls1) mRNA.                          |
| scd0080913.2_173-S  | 0.84                | 1.04              | 1.15               | 0.68                  | 0.99                | 1.40                 | -0.30               | -0.07             | 0.29               | Pum2          | NM_030723.1 | Mus musculus pumilio 2 (Drosophila) (Pum2) mRNA.                                                                            |
| scd008392.2_108-S   | 0.94                | 0.89              | 1.20               | 0.87                  | 0.89                | 1.06                 | -0.27               | -0.34             | -0.18              | Tm7zf1        | NM_029481.1 | Mus musculus transmembrane 7 superfamily member 1 (Tm7zf1) mRNA.                                                            |
| scd0083997.1_6-S    | 0.99                | 1.09              | 1.21               | 0.85                  | 0.89                | 1.11                 | -0.20               | -0.39             | -0.12              | Smagp         | NM_020092.2 | Mus musculus sarcoma associated protein (Smagp) mRNA.                                                                       |
| scd0093765.1_4-S    | 0.83                | 1.03              | 1.15               | 0.72                  | 0.97                | 1.37                 | -0.20               | -0.10             | 0.25               | Uba2n         | NM_080560.2 | Mus musculus ubiquitin-conjugating enzyme E2N (Uba2n) mRNA.                                                                 |
| scd0094061.1_118-S  | 0.97                | 0.99              | 1.23               | 0.82                  | 0.98                | 1.37                 | -0.24               | -0.02             | 0.16               | Mrp1l         | NM_053158.1 | Mus musculus mitochondrial ribosomal protein L1 (Mrp1l) mRNA.                                                               |
| scd0097159.2_2-S    | 0.83                | 0.98              | 1.05               | 0.91                  | 1.06                | 1.38                 | 0.12                | 0.12              | 0.39               | A430005L14Rik | NM_175287.2 | Mus musculus RIKEN cDNA A430005L14 gene (A430005L14Rik) mRNA.                                                               |
| scd0098221.1_97-S   | 0.99                | 1.01              | 1.54               | 0.83                  | 0.81                | 1.39                 | -0.25               | -0.32             | -0.15              | Gal17         | NM_145380.1 | Mus musculus dendritic cell protein Gal17 (Gal17) mRNA.                                                                     |
| scd0098711.1_0-S    | 1.05                | 1.08              | 1.35               | 0.80                  | 0.81                | 1.16                 | -0.38               | -0.42             | -0.21              | Rdh10         | NM_133832.2 | Mus musculus retinol dehydrogenase 10 (all-trans) (Rdh10) mRNA.                                                             |
| scd0098732.2_94-S   | 0.99                | 1.02              | 1.22               | 0.87                  | 0.97                | 1.17                 | -0.19               | -0.19             | -0.19              | 1110059F07Rik | XM_172649.1 | Mus musculus RIKEN cDNA 1110059F07 gene (1110059F07Rik) mRNA.                                                               |
| scd0101543.1_246-S  | 1.03                | 1.01              | 1.17               | 0.90                  | 0.97                | 1.19                 | -0.19               | -0.38             | 0.01               | Wisp          | XM_146921.3 |                                                                                                                             |
| scd0101867.1_184-S  | 1.07                | 1.00              | 1.25               | 0.86                  | 0.84                | 1.10                 | -0.32               | -0.25             | -0.18              | 1500003Q22Rik | NM_025897.1 | Mus musculus RIKEN cDNA 1500003Q22 gene (1500003Q22Rik) mRNA.                                                               |
| scd0102143.1_151-S  | 0.94                | 1.13              | 1.25               | 0.81                  | 0.87                | 1.12                 | -0.22               | -0.38             | -0.15              | D130072Q21Rik | NM_175322.2 | Mus musculus RIKEN cDNA D130072Q21 gene (D130072Q21Rik) mRNA.                                                               |
| scd0102462.1_25-S   | 0.98                | 1.04              | 1.44               | 0.83                  | 0.82                | 1.50                 | -0.23               | -0.35             | -0.07              | 1190002L16Rik | NM_133976.1 | Mus musculus RIKEN cDNA 1190002L16 gene (1190002L16Rik) mRNA.                                                               |
| scd0103534.9_24-S   | 0.94                | 1.05              | 1.15               | 0.84                  | 0.80                | 1.10                 | -0.16               | -0.39             | -0.06              | Mgat4b        | NM_145926.2 | Mus musculus mannoside acetylglucosaminyltransferase 4 isoenzyme B (Mgat4b) mRNA.                                           |
| scd0104457.3_1-S    | 0.98                | 1.05              | 1.16               | 0.86                  | 0.87                | 1.10                 | -0.18               | -0.27             | -0.07              | 0610010K14Rik | NM_026757.1 | Mus musculus RIKEN cDNA 0610010K14 gene (0610010K14Rik) mRNA.                                                               |
| scd0104871.12_190-S | 0.91                | 1.00              | 1.16               | 0.85                  | 0.80                | 1.10                 | -0.25               | -0.10             | -0.07              | Ala61438      | NM_139914.3 |                                                                                                                             |
| scd0105083.1_121-S  | 0.81                | 1.00              | 1.20               | 0.78                  | 0.96                | 1.43                 | -0.05               | -0.07             | -0.13              | Pelo          | NM_134058.1 | Mus musculus pelota homolog (Drosophila) (Pelo) mRNA.                                                                       |
| scd0105245.1_201-S  | 0.93                | 1.04              | 1.41               | 0.81                  | 0.81                | 1.29                 | -0.21               | -0.37             | -0.13              | Tynd5         | NM_145367.2 | Mus musculus thoreadin domain containing 5 (Tynd5) mRNA.                                                                    |
| scd0106597.1_314-S  | 1.01                | 1.02              | 1.30               | 0.78                  | 0.77                | 1.08                 | -0.37               | -0.41             | -0.27              | Ala61933      | NM_128813.3 | Mus musculus expressed sequence Ala61933 (Ala61933) mRNA.                                                                   |
| scd0106618.1_71-S   | 0.78                | 1.06              | 1.08               | 0.69                  | 1.00                | 1.18                 | -0.17               | -0.09             | 0.13               | 3230401M21Rik | NM_128557.2 | Mus musculus RIKEN cDNA 3230401M21 gene (3230401M21Rik) mRNA.                                                               |
| scd0106869.2_1-S    | 0.98                | 1.03              | 1.30               | 0.88                  | 0.80                | 1.20                 | -0.16               | -0.35             | -0.11              | Tnfrap8       | NM_134131.1 | Mus musculus tumor necrosis factor alpha-induced protein 8 (Tnfrap8) mRNA.                                                  |
| scd0106931.1_1-S    | 1.14                | 1.05              | 1.06               | 0.94                  | 0.85                | 1.01                 | -0.27               | -0.31             | -0.06              | Kctd1         | XM_355081.1 |                                                                                                                             |
| scd0107071.9_36-S   | 1.00                | 1.03              | 1.14               | 0.86                  | 0.88                | 1.25                 | -0.22               | -0.24             | -0.15              | 5730436H21Rik | NM_134139.1 | Mus musculus RIKEN cDNA 5730436H21 gene (5730436H21Rik) mRNA.                                                               |
| scd0107392.1_305-S  | 0.83                | 1.04              | 1.21               | 0.84                  | 0.84                | 1.16                 | -0.15               | -0.30             | -0.10              | Unc5b         | NM_134155.1 | Mus musculus breast cancer metastasis suppressor 1 (Bms1) mRNA.                                                             |
| scd0107449.1_138-S  | 1.14                | 0.86              | 1.05               | 0.97                  | 0.84                | 1.03                 | -0.24               | -0.07             | -0.03              | Unc5b         | NM_029770.1 | Mus musculus unc-5 homolog B (C. elegans) (Unc5b) mRNA.                                                                     |
| scd0107686.2_24-S   | 0.87                | 1.03              | 1.28               | 0.76                  | 0.95                | 1.54                 | -0.20               | -0.12             | 0.27               | Shnpd2        | XM_133225.1 | Mus musculus small nuclear ribonucleoprotein D2 (Shnpd2) mRNA.                                                              |
| scd0107734.5_7-S    | 0.96                | 1.01              | 1.10               | 0.83                  | 0.83                | 1.37                 | -0.21               | -0.27             | 0.31               | Mrp30         | NM_027098.1 | Mus musculus mitochondrial ribosomal protein L30 (Mrp30) mRNA.                                                              |
| scd0107995.10_1-S   | 0.92                | 0.97              | 1.01               | 0.84                  | 1.11                | 1.36                 | -0.13               | 0.20              | 0.43               | Cdc20         | NM_023223.1 | Mus musculus cell division cycle 20 homolog (S. cerevisiae) (Cdc20) mRNA.                                                   |
| scd0108121.3_5-S    | 0.85                | 0.96              | 1.15               | 0.71                  | 1.03                | 1.39                 | -0.27               | 0.11              | 0.28               | U2af1         | NM_024187   | Mus musculus U2 small nuclear ribonucleoprotein auxiliary factor (U2af1) (U2af1) mRNA.                                      |
| scd0108991.1_11-S   | 0.96                | 1.05              | 1.39               | 0.84                  | 0.81                | 1.53                 | -0.18               | -0.38             | 0.15               | 1700001A24Rik | NM_175395.2 | Mus musculus RIKEN cDNA 1700001A24 gene (1700001A24Rik) mRNA.                                                               |
| scd0109552.5_10-S   | 0.84                | 1.01              | 1.31               | 0.78                  | 0.87                | 1.21                 | -0.48               | -0.28             | 0.17               | Sn            | NM_026161.2 | Mus musculus serpin (Sn) mRNA.                                                                                              |
| scd0110196.3_64-S   | 0.87                | 1.03              | 1.12               | 0.63                  | 1.07                | 1.52                 | -0.47               | 0.08              | 0.45               | Fdps          | NM_134469.2 | Mus musculus farnesyl diphosphate synthetase (Fdps) mRNA.                                                                   |
| scd0110253.14_323-S | 0.96                | 1.01              | 1.15               | 0.85                  | 0.84                | 1.08                 | -0.18               | -0.27             | -0.10              | Triobp        | NM_138579.2 | Mus musculus TRIO and F-actin binding protein (Triobp) mRNA.                                                                |
| scd0110323.3_24-S   | 0.95                | 0.97              | 1.14               | 0.78                  | 0.95                | 1.27                 | -0.29               | -0.03             | 0.16               | Cox6b         | NM_025628.1 | Mus musculus cytochrome c oxidase subunit VIb (Cox6b) mRNA.                                                                 |
| scd0110460.1_24-S   | 0.78                | 1.09              | 1.24               | 0.69                  | 0.89                | 1.52                 | -0.17               | -0.13             | 0.31               | Acat2         | NM_009339.1 | Mus musculus acetyl-Coenzyme A acetyltransferase 2 (Acat2) mRNA.                                                            |
| scd0110829.10_232-S | 1.14                | 1.11              | 1.28               | 0.86                  | 0.88                | 1.04                 | -0.41               | -0.33             | -0.30              | Lims1         | NM_026148.1 | Mus musculus LIM and senescent cell antigen-like domains 1 (Lims1) mRNA.                                                    |
| scd0110842.2_3-S    | 0.90                | 1.04              | 1.33               | 0.82                  | 0.95                | 1.48                 | -0.13               | -0.13             | -0.12              | Etf1a         | NM_145615.2 | Mus musculus electron transferring flavoprotein alpha polypeptide (Etf1a) nuclear gene encoding mitochondrial protein mRNA. |
| scd0114664.1_62-S   | 1.03                | 1.06              | 1.23               | 0.86                  | 0.89                | 1.20                 | -0.36               | -0.41             | 0.17               | Ohn3352.2     | NM_053352.2 | Mus musculus dehydrogenase (SDH) family member 8 (Ohn3352.2) mRNA.                                                          |
| scd011544.1_20-S    | 0.98                | 1.04              | 1.17               | 0.87                  | 0.85                | 1.26                 | -0.18               | -0.29             | 0.12               | Adprh         | NM_007414.2 | Mus musculus ADP-ribosylarginine hydrolase (Adprh) mRNA.                                                                    |
| scd0116871.14_11-S  | 0.97                | 1.10              | 1.31               | 0.75                  | 0.80                | 1.26                 | -0.38               | -0.47             | -0.06              | Mia3          | NM_054082.1 | Mus musculus metastasis associated 3 (Mia3) mRNA.                                                                           |
| scd0117109.5_26-S   | 0.91                | 1.02              | 1.20               | 0.75                  | 0.91                | 1.49                 | -0.28               | -0.16             | 0.31               | Pop5          | NM_026398.2 | Mus musculus processing of precursor 5 ribonuclease P/MRP family (S. cerevisiae) (Pop5) mRNA.                               |
| scd011747.1_83-S    | 1.02                | 0.95              | 1.25               | 0.85                  | 0.71                | 1.14                 | -0.26               | -0.42             | -0.14              | Anxa5         | NM_009673.1 | Mus musculus annexin A5 (Anxa5) mRNA.                                                                                       |
| scd011773.12_241-S  | 0.98                | 1.09              | 1.12               | 0.82                  | 0.84                | 1.20                 | -0.26               | -0.37             | 0.11               | Ap2m1         | NM_009679.1 | Mus musculus adaptor protein complex AP-2 mu1 (Ap2m1) mRNA.                                                                 |
| scd011777.6_49-S    | 1.06                | 1.02              | 1.03               | 0.90                  | 0.82                | 1.05                 | -0.24               | -0.31             | 0.03               | Ap3s1         | NM_009681.2 | Mus musculus adaptor-related protein complex 3 sigma 1 subunit (Ap3s1) mRNA.                                                |
| scd011781.1_306-S   | 1.11                | 1.03              | 1.08               | 1.02                  | 0.88                | 0.99                 | -0.12               | -0.22             | 0.10               | Ap3s2         | NM_009682.2 | Mus musculus adaptor-related protein complex 3 sigma 2 subunit (Ap3s2) mRNA.                                                |
| scd011798.1_11-S    | 0.63                | 0.93              | 1.30               | 0.51                  | 1.02                | 1.92                 | -0.27               | 0.14              | 0.55               | Birc5         | NM_009689.1 | Mus musculus baculoviral IAP repeat-containing 5 (Birc5) mRNA.                                                              |
| scd011821.1_236-S   | 1.04                | 1.01              | 1.04               | 0.89                  | 0.79                | 1.19                 | -0.22               | -0.35             | 0.20               | Aprt          | NM_009698.1 | Mus musculus adenine phosphoribosyl transferase (Aprt) mRNA.                                                                |
| scd011844.1_12-S    | 0.79                | 1.05              | 1.27               | 0.75                  | 0.95                | 1.68                 | -0.06               | -0.15             | 0.40               | Arf5          | NM_007480.1 | Mus musculus ADP-ribosylation factor 5 (Arf5) mRNA.                                                                         |
| scd011886.1_45-S    | 1.05                | 1.01              | 1.36               | 0.86                  | 0.76                | 1.33                 | -0.28               | -0.41             | -0.03              | Asah1         | NM_019734.1 | Mus musculus N-acetylglucosamine amidohydrolase 1 (Asah1) mRNA.                                                             |
| scd011898.16_99-S   | 1.23                | 1.09              | 1.14               | 0.98                  | 0.89                | 0.93                 | -0.32               | -0.26             | -0.29              | Ass1          | NM_007494.2 | Mus musculus argininosuccinate synthetase 1 (Ass1) mRNA.                                                                    |
| scd011949.3_3-S     | 0.93                | 1.08              | 1.20               | 0.85                  | 0.86                | 1.39                 | -0.13               | -0.33             | -0.21              | Altp5c1       | NM_020615.2 | Mus musculus ATP synthase H+ transporting mitochondrial F1 complex gamma polypeptide 1 (Altp5c1) mRNA.                      |
| scd011951.2_99-S    | 1.01                | 1.01              | 1.28               | 0.87                  | 0.80                | 1.46                 | -0.22               | -0.17             | 0.22               | Altp5l        | NM_007656.2 | Mus musculus ATP synthase H+ transporting mitochondrial FO complex subunit 5 (subunit 9) isoform 1 (Altp5l1) mRNA.          |
| scd011968.1_120-S   | 1.09                | 1.01              | 1.14               | 0.84                  | 0.84                | 1.20                 | -0.38               | -0.41             | 0.21               | Altp5v1a1     | NM_007509.2 | Mus musculus ATP synthase H+ transporting mitochondrial FO complex subunit 5 (subunit 9) isoform 1 (Altp5v1a1) mRNA.        |
| scd011972.1_247     |                     |                   |                    |                       |                     |                      |                     |                   |                    |               |             |                                                                                                                             |

| Gene Name          | Control<br>18 Hours | Control<br>1 Week | Control<br>4 Weeks | Treatment<br>18 Hours | Treatment<br>1 Week | Treatment<br>4 Weeks | Log2 FC<br>18 Hours | Log2 FC<br>1 Week | Log2 FC<br>4 Weeks | Symbol   | Accession   | Definition                                                                                                    |
|--------------------|---------------------|-------------------|--------------------|-----------------------|---------------------|----------------------|---------------------|-------------------|--------------------|----------|-------------|---------------------------------------------------------------------------------------------------------------|
| sc013204.1 302-S   | 0.82                | 1.07              | 1.25               | 0.67                  | 0.95                | 1.22                 | -0.29               | -0.18             | -0.03              | Dhx15    | NM_007839.1 | Mus musculus DEAH (Asp-Glu-Ala-His) box polypeptide 15 (Dhx15) mRNA.                                          |
| sc013244.1 23-S    | 0.97                | 1.09              | 1.33               | 0.84                  | 0.81                | 1.31                 | -0.21               | -0.43             | -0.02              | Degs     | NM_007853.2 | Mus musculus degenerative spermatocyte homolog (Drosophila) (Degs) mRNA.                                      |
| sc013445.1 266-S   | 0.87                | 1.04              | 1.22               | 0.79                  | 0.94                | 1.38                 | -0.13               | -0.14             | 0.18               | Cdk2ap1  | NM_013812.1 | Mus musculus CDK2 (cyclin-dependent kinase 2)-associated protein 1 (Cdk2ap1) mRNA.                            |
| sc013629.14 1-S    | 0.92                | 1.13              | 1.43               | 0.84                  | 0.90                | 1.33                 | -0.12               | -0.33             | -0.11              | Eef2     | NM_007907.1 | Mus musculus eukaryotic translation elongation factor 2 (Eef2) mRNA.                                          |
| sc013723.3 38-S    | 0.87                | 1.05              | 1.34               | 0.83                  | 0.89                | 1.50                 | -0.24               | -0.25             | 0.16               | Egret1   | NM_007938.1 | Mus musculus small inducible cytokine subfamily E member 1 (Egret1) mRNA.                                     |
| sc013723.9 329-S   | 1.12                | 1.11              | 1.06               | 0.95                  | 0.80                | 1.01                 | -0.23               | -0.47             | -0.06              | Emb5     | NM_010330.2 | Mus musculus embryonic (Emb) mRNA.                                                                            |
| sc013728.1 329-S   | 0.99                | 1.09              | 1.47               | 0.77                  | 0.93                | 1.43                 | -0.37               | -0.22             | -0.04              | Mark2    | NM_007928.1 | Mus musculus MAP/microtubule affinity-regulating kinase 2 (Mark2) mRNA.                                       |
| sc013885.9 29-S    | 0.93                | 1.08              | 1.25               | 0.85                  | 0.92                | 1.27                 | -0.14               | -0.24             | 0.03               | Esd      | NM_016903   |                                                                                                               |
| sc013929.8 8-S     | 0.98                | 1.01              | 1.13               | 0.92                  | 0.82                | 1.17                 | -0.10               | -0.30             | 0.06               | KX3328   | NM_025275.2 | Mus musculus EST X83328 (X83328) mRNA.                                                                        |
| sc014050.16 119-S  | 0.94                | 1.06              | 1.30               | 0.74                  | 0.95                | 1.20                 | -0.35               | -0.16             | -0.13              | Eya3     | NM_010166.2 | Mus musculus eyes absent 3 homolog (Drosophila) (Eya3) transcript variant 2 mRNA.                             |
| sc014057.6 27-S    | 0.99                | 0.97              | 1.21               | 0.86                  | 0.93                | 1.41                 | -0.20               | -0.07             | 0.23               | Shn1     | NM_027342.1 | Mus musculus sideroflexin 1 (Shn1) mRNA.                                                                      |
| sc014081.20 105-S  | 0.93                | 1.03              | 1.34               | 0.83                  | 0.89                | 1.25                 | -0.08               | -0.22             | 0.11               | Egret1.2 | NM_007938.1 | Mus musculus small inducible cytokine long chain family member 1 (Acs1) mRNA.                                 |
| sc014130.1 14-S    | 0.97                | 1.08              | 1.29               | 0.84                  | 0.82                | 1.24                 | -0.21               | -0.58             | -0.05              | Fcgr2b   | NM_010187.1 | Mus musculus Fc receptor IgG low affinity IIb (Fcgr2b) mRNA.                                                  |
| sc014131.3 5-S     | 1.02                | 1.09              | 1.53               | 0.93                  | 0.83                | 1.59                 | -0.13               | -0.39             | 0.06               | Fcgr3    | NM_010188.2 | Mus musculus Fc receptor IgG low affinity III (Fcgr3) mRNA.                                                   |
| sc014227.3 23-S    | 1.06                | 0.97              | 1.10               | 0.91                  | 0.92                | 1.28                 | -0.22               | -0.07             | 0.22               | Fkbp2    | NM_008020.2 | Mus musculus FK506 binding protein 2 (Fkbp2) mRNA.                                                            |
| sc014235.8 6-S     | 0.83                | 1.11              | 1.19               | 0.66                  | 0.96                | 1.25                 | -0.32               | -0.20             | 0.09               | Foem1    | NM_008021.2 | Mus musculus forkhead box M1 (Foem1) mRNA.                                                                    |
| sc014252.10 327-S  | 1.06                | 1.04              | 1.02               | 0.88                  | 0.84                | 0.93                 | -0.27               | -0.32             | -0.14              | Fliot2   | NM_008028.1 | Mus musculus flotillin 2 (Fliot2) mRNA.                                                                       |
| sc014312.1 1-S     | 0.94                | 1.18              | 1.23               | 0.81                  | 0.93                | 1.08                 | -0.22               | -0.34             | -0.18              | Brd2     | NM_010238.1 | Mus musculus bromodomain containing 2 (Brd2) mRNA.                                                            |
| sc014319.1 38-S    | 0.90                | 1.01              | 1.54               | 0.75                  | 1.01                | 1.88                 | -0.27               | 0.00              | 0.28               | Fhn1     | NM_010239.1 |                                                                                                               |
| sc014390.3 27-S    | 0.94                | 1.05              | 1.13               | 0.89                  | 1.03                | 1.35                 | -0.08               | -0.04             | 0.28               | Gabpa    | NM_008052.2 | Mus musculus GA repeat binding protein alpha (Gabpa) mRNA.                                                    |
| sc014548.2 14-S    | 0.89                | 1.03              | 1.35               | 0.74                  | 0.93                | 1.62                 | -0.27               | -0.15             | 0.26               | Mps33    | NM_010270.1 | Mus musculus mitochondrial ribosomal protein S33 (Mps33) mRNA.                                                |
| sc014852.1 8-S     | 0.99                | 0.99              | 1.18               | 0.79                  | 0.94                | 1.41                 | -0.31               | -0.08             | 0.26               | Gsp1     | NM_146066.1 | Mus musculus G1 to phase transition 1 (Gsp1) mRNA.                                                            |
| sc014862.2 242-S   | 0.96                | 1.06              | 1.34               | 0.93                  | 0.69                | 1.34                 | -0.04               | -0.61             | 0.00               | Gstm1    | NM_010358.2 | Mus musculus glutathione S-transferase mu 1 (Gstm1) mRNA.                                                     |
| sc014897.1 33-S    | 0.98                | 1.02              | 1.46               | 0.76                  | 0.91                | 1.37                 | -0.36               | -0.17             | -0.08              | Trtp2    | NM_133975.2 |                                                                                                               |
| sc015191.7 7-S     | 0.90                | 1.11              | 1.30               | 0.75                  | 0.99                | 1.54                 | -0.25               | -0.16             | 0.26               | Hdgf     | NM_008231.2 | Mus musculus hepatoma-derived growth factor (Hdgf) mRNA.                                                      |
| sc015584.1 28-S    | 0.94                | 1.11              | 1.09               | 0.86                  | 0.96                | 1.02                 | -0.12               | -0.54             | -0.09              | Hnf1     | NM_008260.1 |                                                                                                               |
| sc015381.1 4-S     | 0.87                | 1.01              | 1.19               | 0.78                  | 1.00                | 1.18                 | -0.16               | -0.11             | 0.51               | Hnrnp    | NM_016894.1 | Mus musculus heterogeneous nuclear ribonucleoprotein C (Hnrnp) mRNA.                                          |
| sc015382.13 13-S   | 1.02                | 0.97              | 1.29               | 0.85                  | 0.77                | 1.18                 | -0.26               | -0.33             | -0.11              | Hnrpa1   | NM_010447   | Mus musculus heterogeneous nuclear ribonucleoprotein A1 (Hnrpa1) mRNA.                                        |
| sc015384.1 1-S     | 0.89                | 1.06              | 1.24               | 0.76                  | 0.94                | 1.39                 | -0.23               | -0.17             | 0.16               | Hnrpab   | NM_010448.2 | Mus musculus heterogeneous nuclear ribonucleoprotein A/B (Hnrpab) mRNA.                                       |
| sc015387.16 11-S   | 0.91                | 1.04              | 1.25               | 0.73                  | 1.04                | 1.75                 | -0.32               | -0.01             | 0.48               | Hnrpk    | NM_025279.1 | Mus musculus heterogeneous nuclear ribonucleoprotein K (Hnrpk) mRNA.                                          |
| sc015441.12 277-S  | 0.93                | 1.10              | 1.29               | 0.90                  | 0.83                | 1.27                 | -0.04               | -0.39             | -0.01              | Hp1bp3   | NM_010470.1 | Mus musculus heterochromatin protein 1 binding protein 3 (Hp1bp3) mRNA.                                       |
| sc015469.1 28-S    | 1.01                | 1.02              | 1.35               | 0.82                  | 0.89                | 1.54                 | -0.31               | -0.20             | 0.22               | Hrm1t2   | NM_019830.1 | Mus musculus heterogeneous nuclear ribonucleoproteins methyltransferase-like 2 (S. cerevisiae) (Hrm1t2) mRNA. |
| sc015518.1 32-S    | 0.82                | 0.99              | 1.21               | 0.65                  | 1.02                | 1.70                 | -0.35               | 0.03              | 0.47               | Hspa3    | NM_008261.2 | Mus musculus heat shock protein 1 alpha (Hspa3) mRNA.                                                         |
| sc016017.7 252-S   | 1.07                | 1.13              | 1.19               | 0.88                  | 0.76                | 1.02                 | -0.28               | -0.54             | -0.08              | Igf4     | NM_010517.2 | Mus musculus insulin-like growth factor binding protein 4 (Igf4) mRNA.                                        |
| sc016173.28 8-S    | 1.30                | 0.77              | 1.13               | 0.92                  | 0.53                | 1.01                 | -0.52               | -0.03             | -0.15              | Il18     | NM_008360.1 | Mus musculus interleukin 18 (Il18) mRNA.                                                                      |
| sc016201.19 34-S   | 0.97                | 1.12              | 1.48               | 0.84                  | 0.87                | 1.56                 | -0.21               | -0.36             | 0.08               | Il3      | NM_010561.1 | Mus musculus interleukin enhancer binding factor 3 (Il3) mRNA.                                                |
| sc016202.8 23-S    | 0.95                | 1.02              | 1.03               | 0.81                  | 0.85                | 1.14                 | -0.22               | -0.25             | 0.14               | Ilk      | NM_010562.1 | Mus musculus integrin linked kinase (Ilk) mRNA.                                                               |
| sc016418.1 114-S   | 0.95                | 1.02              | 1.21               | 0.79                  | 0.83                | 1.21                 | -0.26               | -0.29             | 0.01               | Ilgb4bp  | NM_010579.1 | Mus musculus integrin beta 4 binding protein (Ilgb4bp) mRNA.                                                  |
| sc016432.2 9-S     | 0.98                | 1.09              | 1.31               | 0.87                  | 0.84                | 1.38                 | -0.17               | -0.37             | 0.07               | Itih2b   | NM_008410.1 | Mus musculus integral membrane protein 2B (Itih2b) mRNA.                                                      |
| sc016477.1 59-S    | 0.94                | 1.08              | 1.17               | 0.83                  | 0.96                | 1.04                 | -0.33               | -0.51             | -0.16              | Junb     | NM_008411.1 | Mus musculus Jun-B oncogene (Junb) mRNA.                                                                      |
| sc016653.1 47-S    | 0.87                | 1.08              | 1.25               | 0.73                  | 0.94                | 1.28                 | -0.26               | -0.14             | 0.21               | Kras2    | NM_021284.2 | Mus musculus Kirsten rat sarcoma oncogene 2 expressed (Kras2) mRNA.                                           |
| sc016784.1 5-S     | 1.04                | 1.06              | 1.26               | 0.88                  | 0.75                | 1.16                 | -0.22               | -0.49             | -0.12              | Lamp2    | NM_010685.2 | Mus musculus lysosomal membrane glycoprotein 2 (Lamp2) mRNA.                                                  |
| sc016822.21 5-S    | 1.13                | 0.85              | 1.09               | 0.89                  | 0.63                | 1.03                 | -0.35               | -0.42             | -0.08              | Lcp2     | NM_010696.2 | Mus musculus lymphocyte cytosolic protein 2 (Lcp2) mRNA.                                                      |
| sc016909.6 211-S   | 0.70                | 1.03              | 1.25               | 0.60                  | 0.96                | 1.45                 | -0.24               | -0.10             | 0.21               | Lmo2     | NM_008053.3 | Mus musculus LIM domain only 2 (Lmo2) mRNA.                                                                   |
| sc017063.13 302-S  | 1.15                | 1.07              | 0.92               | 0.97                  | 0.86                | 1.06                 | -0.24               | -0.32             | 0.21               | Ly64     | NM_010739.1 | Mus musculus lymphocyte antigen 64 (Ly64) mRNA.                                                               |
| sc0170658.2 22-S   | 0.97                | 1.01              | 1.26               | 0.81                  | 0.91                | 1.44                 | -0.26               | -0.15             | 0.19               | Ndufs5   | XM_355517.1 | Mus musculus NADH dehydrogenase (ubiquinone) Fe-S protein 5 (Ndufs5) mRNA.                                    |
| sc017069.4 4-S     | 0.98                | 1.05              | 1.32               | 0.80                  | 0.98                | 1.42                 | -0.29               | -0.10             | 0.11               | Ly6e     | NM_008529   | Mus musculus lymphocyte antigen 6 complex locus E (Ly6e) mRNA.                                                |
| sc017071.1 22-S    | 1.07                | 1.02              | 1.33               | 0.83                  | 0.98                | 1.02                 | -0.38               | -0.26             | 0.38               | Lyb3     | NM_008529.1 | Mus musculus lysate dehydrogenase 1 (NAD+) beta (Lyb3) mRNA.                                                  |
| sc0170750.1 173-S  | 0.77                | 1.09              | 1.09               | 0.67                  | 1.08                | 1.35                 | -0.19               | -0.04             | 0.33               | Xorpep1  | NM_133216.2 | Mus musculus X-prolyl aminopeptidase (aminopeptidase P) 1 soluble (Xorpep1) mRNA.                             |
| sc0170755.15 107-S | 0.70                | 0.97              | 1.24               | 0.66                  | 1.02                | 1.59                 | -0.09               | 0.08              | 0.35               | Sgk3     | NM_177547.2 | Mus musculus serum/glucocorticoid regulated kinase 3 (Sgk3) mRNA.                                             |
| sc0170763.2 1-S    | 0.84                | 1.14              | 1.43               | 0.85                  | 0.95                | 1.54                 | -0.01               | -0.25             | 0.12               | Zfp87    | NM_133228.2 | Mus musculus zinc finger protein 87 (Zfp87) mRNA.                                                             |
| sc0170791.2 95-S   | 0.82                | 1.05              | 1.20               | 0.62                  | 0.87                | 1.12                 | -0.41               | -0.29             | -0.10              | Rnpc2    | NM_133242.1 | Mus musculus RNA-binding region (RNP1 RRM) containing 2 (Rnpc2) mRNA.                                         |
| sc017113.8 48-S    | 1.02                | 1.02              | 1.26               | 0.85                  | 0.87                | 1.29                 | -0.26               | -0.23             | 0.04               | M6pr     | NM_010749.1 | Mus musculus mannose-6-phosphate receptor cation dependent (M6pr) mRNA.                                       |
| sc017169.9 120-S   | 0.91                | 1.07              | 1.25               | 0.85                  | 0.88                | 1.17                 | -0.11               | -0.28             | -0.08              | Mark3    | NM_021516.1 | Mus musculus MAP/microtubule affinity-regulating kinase 3 (Mark3) mRNA.                                       |
| sc017420.8 104-S   | 1.03                | 1.04              | 1.01               | 0.85                  | 0.91                | 1.06                 | -0.36               | -0.16             | 0.11               | Mnat1    | NM_008612.1 | Mus musculus menage a trois 1 (Mnat1) mRNA.                                                                   |
| sc017527.1 149-S   | 0.97                | 1.01              | 1.16               | 0.92                  | 0.90                | 1.31                 | -0.09               | -0.21             | -0.19              | Mpv17    | NM_008622.1 | Mus musculus Mpv17 transgene kidney disease mutant (Mpv17) mRNA.                                              |
| sc017826.2 113-S   | 0.87                | 1.09              | 1.23               | 0.82                  | 0.81                | 1.25                 | -0.08               | -0.43             | 0.03               | Mtvr2    | NM_023166   | Mus musculus mammary tumor virus receptor 2 (Mtvr2) mRNA.                                                     |
| sc017846.2 20-S    | 0.93                | 1.01              | 1.14               | 0.80                  | 0.95                | 1.36                 | -0.21               | -0.09             | 0.25               | Comm1d   | NM_144514.1 | Mus musculus COMM domain containing 1 (Comm1d) mRNA.                                                          |
| sc017970.15 30-S   | 1.00                | 1.05              | 1.20               | 0.88                  | 0.80                | 1.07                 | -0.19               | -0.38             | -0.15              | Ncl2     | NM_010877   | Mus musculus neutrophil cytosolic factor 2 (Ncl2) mRNA.                                                       |
| sc017992.3 16-S    | 0.88                | 1.06              | 1.30               | 0.74                  | 1.00                | 1.73                 | -0.26               | -0.09             | 0.41               | Ndufa4   | NM_010886.1 | Mus musculus NADH dehydrogenase (ubiquinone) 1 alpha subcomplex 4 (Ndufa4) mRNA.                              |
| sc017993.1 123-S   | 0.96                | 1.06              | 1.17               | 0.83                  | 0.90                | 1.24                 | -0.21               | -0.23             | 0.08               | Ndufa4   | NM_010887.1 | Mus musculus NADH dehydrogenase (ubiquinone) Fe-S protein 4 (Ndufa4) mRNA.                                    |
| sc018162.9 154-S   | 0.95                | 1.00              | 1.15               | 0.84                  | 0.89                | 1.35                 | -0.16               | -0.14             | 0.16               | Nme1     | NM_008705.2 | Mus musculus expressed in non-metastatic cells 1 protein (Nme1) mRNA.                                         |
| sc018103.3 14-S    | 1.10                | 0.88              | 1.14               | 0.85                  | 0.61                | 1.18                 | -0.38               | -0.55             | -0.04              | Nme2     | NM_008705.3 | Mus musculus expressed in non-metastatic cells 2 protein (Nme2) mRNA.                                         |
| sc018120.4 62-S    | 0.81                | 1.02              | 1.16               | 0.64                  | 0.93                | 1.29                 | -0.34               | -0.14             | 0.16               | Mpi49    | NM_026246.1 | Mus musculus mitochondrial ribosomal protein L49 (Mpi49) mRNA.                                                |
| sc018412.1 16-S    | 0.97                | 1.14              | 1.52               | 0.78                  | 0.78                | 1.36                 | -0.33               | -0.54             | -0.15              | Sqstm1   | NM_010181.1 | Mus musculus sequestosome 1 (Sqstm1) mRNA.                                                                    |
| sc018458.3 17-S    | 1.08                | 0.96              | 1.26               | 0.96                  | 0.88                | 1.24                 | -0.17               | -0.13             | -0.03              | Palpcc1  | NM_008774.2 | Mus musculus poly A binding protein cytoplasmic 1 (Palpcc1) mRNA.                                             |
| sc018516.1 119-S   | 0.91                | 1.12              | 1.26               | 0.75                  | 0.94                | 1.29                 | -0.28               | -0.24             | 0.03               | Pbx3     | NM_016768.1 | Mus musculus pre B-cell leukemia transcription factor 3 (Pbx3) mRNA.                                          |
| sc018715.6 137-S   | 1.00                | 1.03              | 1.12               | 0.89                  | 0.83                | 1.05                 | -0.16               | -0.32             | -0.09              | Pim2     | NM_138606.1 | Mus musculus proviral integration site 2 (Pim2) mRNA.                                                         |
| sc018733.1 24-S    | 1.70                | 0.90              | 1.28               | 1.22                  | 0.71                | 0.94                 | -0.53               | -0.34             | -0.46              | Pirb     | NM_011095.1 | Mus musculus paired-1p-like receptor B (Pirb) mRNA.                                                           |
| sc018744.1 4-S     | 0.96                | 1.02              | 1.20               | 0.74                  | 0.85                | 1.35                 | -0.35               | -0.25             | 0.18               | Pja1     | NM_008853.1 | Mus musculus pja1 RING-H2 motif containing (Pja1) mRNA.                                                       |
| sc018751.17 49-S   | 1.05                | 0.99              | 1.26               | 0.84                  | 0.78                | 1.09                 | -0.34               | -0.36             | -0.22              | Pknox    | NM_008855.1 |                                                                                                               |
| sc018771.13 29-S   | 0.90                | 1.04              | 1.07               | 0.78                  | 0.97                | 1.36                 | -0.19               | -0.10             | 0.35               | Pknox1   | NM_016670.2 | Mus musculus Pbx/knotted 1 homeobox (Pknx1) mRNA.                                                             |
| sc018826.17 181-S  | 1.04                | 0.96              | 1.15               | 0.72                  | 0.80                | 1.14                 | -0.53               | -0.26             | -0.01              | Lcp1     | NM_008879.2 | Mus musculus lymphocyte cytosolic protein 1 (Lcp1) mRNA.                                                      |
| sc019042.1 95-S    | 0.91                | 1.02              | 1.20               | 0.83                  | 0.91                | 1.43                 | -0.14               | -0.16             | 0.26               | Ppm1a    | NM_008910.2 | Mus musculus protein phosphatase 1A magnesium dependent alpha isoform (Ppm1a) mRNA.                           |
| sc019047.11 32-S   | 0.83                | 1.11              | 1.38               | 0.69                  | 0.87                | 1.29                 | -0.27               | -0.35             | -0.10              | Ppp1tc   | NM_013636.2 | Mus musculus protein phosphatase 1 catalytic subunit gamma isoform (Ppp1tc) mRNA.                             |
| sc019068.1 329-S   | 0.94                | 1.12              | 1.25               | 0.83                  | 0.85                | 1.49                 | -0.19               | -0.23             | 0.26               | Efn      | NM_007951.1 | Mus musculus enhancer of rudimentary homolog (Drosophila) (Efn) mRNA.                                         |
| sc019166.9 97-S    | 0.97                | 1.05              | 1.21               | 0.84                  | 0.91                | 1.47                 | -0.21               | -0.17             | 0.20               | Psmc2    | NM_008946.1 | Mus musculus proteasome (prosome macropain) subunit alpha type 2 (Psmc2) mRNA.                                |
| sc019175.6 47-S    | 0.95                | 1.04              | 1.26               | 0.77                  | 0.86                | 1.46                 | -0.30               | -0.30             | 0.21               | Psmc6    | NM_008946   | Mus musculus proteasome (prosome macropain) subunit beta type 6 (Psmc6) mRNA.                                 |
| sc019182.11 5-S    | 0.92                | 1.11              | 1.23               | 0.80                  | 0.97                | 1.35                 | -0.20               | -0.19             | 0.13               | Psmc3    | NM_008948.1 | Mus musculus proteasome (prosome macropain) 26S subunit ATPase 3 (Psmc3) mRNA.                                |
| sc019186.11 4-S    | 1.01                | 1.02              | 1.37               | 0.82                  | 0.80                | 1.23                 | -0.30               | -0.35             | -0.16              | Psmc1    | NM_011189.1 | Mus musculus proteasome (prosome macropain) 28 subunit alpha (Psmc1) mRNA.                                    |
| sc0192170.3 20-S   | 0.87                | 1.04              | 1.31               | 0.81                  | 0.95                | 1.46                 | -0.10               | -0.12             | 0.16               | Ddx48    | NM_138699.1 | Mus musculus DEAD (Asp-Glu-Ala-Asp) box polypeptide 48 (Ddx48) mRNA.                                          |
| sc0192174.7 133-S  | 0.98                | 1.02              | 1.18               | 0.85                  | 0.81                | 1.04                 | -0.11               | -0                |                    |          |             |                                                                                                               |

| Gene Name          | Control<br>18 Hours | Control<br>1 Week | Control<br>4 Weeks | Treatment<br>18 Hours | Treatment<br>1 Week | Treatment<br>4 Weeks | Log2 FC<br>18 Hours | Log2 FC<br>1 Week | Log2 FC<br>4 Weeks | Symbol        | Accession   | Definition                                                                                                         |
|--------------------|---------------------|-------------------|--------------------|-----------------------|---------------------|----------------------|---------------------|-------------------|--------------------|---------------|-------------|--------------------------------------------------------------------------------------------------------------------|
| sc020317.1 68-S    | 1.14                | 1.02              | 1.04               | 0.89                  | 0.86                | 1.03                 | -0.35               | -0.24             | -0.01              | Serp1f1       | NM_011340.2 | Mus musculus serine (or cysteine) proteinase inhibitor clade F member 1 (Serp1f1) mRNA.                            |
| sc020335.2 33-S    | 0.98                | 1.02              | 1.24               | 0.87                  | 0.87                | 1.16                 | -0.17               | -0.23             | -0.09              | Sec61g        | XM_122171.1 | Mus musculus SEC61 gamma subunit (Sec61g) mRNA.                                                                    |
| sc020343.13 0-S    | 0.95                | 1.18              | 1.37               | 0.79                  | 0.80                | 1.24                 | -0.27               | -0.54             | -0.14              | Sell          | NM_011346.1 | Mus musculus selectin lymphocyte (Sell) mRNA.                                                                      |
| sc0203952.3 242-S  | 0.95                | 1.06              | 1.26               | 0.73                  | 0.72                | 1.06                 | -0.37               | -0.51             | -0.25              | Sgk           | NM_017361.1 | Mus musculus serum/glucocorticoid regulated kinase (Sgk) mRNA.                                                     |
| sc020430.29 22-S   | 1.12                | 0.91              | 1.25               | 0.81                  | 0.75                | 0.98                 | -0.38               | -0.25             | -0.23              | Sprb          | NM_001330.1 | Mus musculus alpha FMBR interacting protein 1 (Cyflp1) mRNA.                                                       |
| sc020541.2 143-S   | 1.07                | 0.89              | 1.24               | 0.85                  | 0.64                | 1.09                 | -0.33               | -0.47             | -0.18              | Slc8a1        | NM_011406.1 | Mus musculus solute carrier family 8 (sodium/calcium exchanger) member 1 (Slc8a1) mRNA.                            |
| sc020567.3 14-S    | 0.95                | 1.10              | 1.37               | 0.82                  | 0.78                | 1.32                 | -0.21               | -0.48             | -0.05              | Slp           | NM_011413   | Mus musculus sex-limited protein (Slp) mRNA.                                                                       |
| sc020610.4 145-S   | 0.91                | 1.05              | 1.37               | 0.82                  | 0.94                | 1.74                 | -0.16               | -0.17             | 0.35               | Sumo3         | NM_019929   |                                                                                                                    |
| sc020655.4 35-S    | 0.89                | 1.08              | 1.25               | 0.78                  | 0.90                | 1.28                 | -0.20               | -0.26             | 0.03               | Sod1          | NM_011434.1 | Mus musculus superoxide dismutase 1 soluble (Sod1) mRNA.                                                           |
| sc020719.1 146-S   | 1.04                | 1.02              | 1.43               | 0.92                  | 0.71                | 1.29                 | -0.18               | -0.52             | -0.16              | Serp1nb6a     | NM_009254.2 | Mus musculus serine (or cysteine) proteinase inhibitor clade B member 6a (Serp1nb6a) mRNA.                         |
| sc020952.3 242-S   | 0.77                | 0.95              | 1.21               | 0.79                  | 1.05                | 1.38                 | -0.05               | -0.15             | 0.19               | BC0227373     | NM_182782.1 | Mus musculus cDNA sequence BC0227373 (BC0227373) mRNA.                                                             |
| sc020918.5 511-S   | 1.01                | 1.01              | 1.19               | 0.81                  | 0.89                | 0.46                 | -0.18               | -0.18             | 0.23               | Sprb          | NM_001330.1 | Mus musculus alpha FMBR interacting protein 1 (Cyflp1) mRNA.                                                       |
| sc020926.1 69-S    | 0.98                | 0.96              | 1.47               | 0.79                  | 0.81                | 1.29                 | -0.33               | -0.24             | -0.18              | Ssta1         | XM_195564.2 | Mus musculus sperm specific antigen 1 (Ssta1) mRNA.                                                                |
| sc020948.1 5-S     | 1.15                | 1.01              | 1.21               | 0.91                  | 0.76                | 0.97                 | -0.34               | -0.39             | -0.30              | Stat3         | NM_011486.2 | Mus musculus signal transducer and activator of transcription 3 (Stat3) mRNA.                                      |
| sc0208518.1 281-S  | 0.96                | 1.06              | 1.21               | 0.86                  | 0.93                | 1.24                 | -0.16               | -0.18             | 0.05               | 5730599105Rik | NM_198019.1 | Mus musculus RIKEN cDNA 5730599105 gene (5730599105Rik) mRNA.                                                      |
| sc0209011.1 312-S  | 0.91                | 1.14              | 1.24               | 0.91                  | 0.90                | 1.30                 | 0.00                | -0.33             | 0.06               | Sirt7         | NM_153056.1 | Mus musculus sirtuin 7 (silent mating type information regulation 2 homology) 7 (S. cerevisiae) (Sirt7) mRNA.      |
| sc0209018.32 127-S | 1.01                | 1.02              | 1.21               | 0.92                  | 0.86                | 1.16                 | -0.13               | -0.25             | -0.05              | A1315068      | XM_148253.1 | Mus musculus expressed sequence A1315068 (A1315068) mRNA.                                                          |
| sc020920.1 109-S   | 0.95                | 1.15              | 1.35               | 0.86                  | 0.78                | 1.28                 | -0.16               | -0.55             | -0.08              | BC022741      | XM_148592.3 | Mus musculus cDNA sequence BC022741 (BC022741) mRNA.                                                               |
| sc020936.1 330-S   | 0.97                | 1.03              | 1.15               | 0.83                  | 0.90                | 1.24                 | -0.19               | -0.30             | 0.11               | Supth         | NM_009291.1 | Mus musculus suppressor of Ty 6 homolog (S. cerevisiae) (Supth) mRNA.                                              |
| sc0209318.14 24-S  | 1.01                | 0.90              | 1.19               | 0.79                  | 0.85                | 1.25                 | -0.35               | -0.09             | 0.07               | Gps1          | NM_145370.1 | Mus musculus G protein pathway suppressor 1 (Gps1) mRNA.                                                           |
| sc021006.1 119-S   | 0.83                | 1.09              | 1.27               | 0.71                  | 0.93                | 1.21                 | -0.23               | -0.23             | -0.06              | Pole          | NM_198600.1 | Mus musculus polymerase (DNA directed) sigma (Pole) mRNA.                                                          |
| sc0210711.2 41-S   | 1.03                | 1.03              | 1.12               | 0.84                  | 0.90                | 1.24                 | -0.29               | -0.19             | 0.15               | 1110007A13Rik | NM_145955.2 | Mus musculus RIKEN cDNA 1110007A13 gene (1110007A13Rik) mRNA.                                                      |
| sc0212073.1 166-S  | 0.84                | 1.07              | 1.07               | 0.72                  | 0.97                | 1.28                 | -0.20               | -0.14             | 0.26               | 483142619Rik  | NM_172500.1 | Mus musculus RIKEN cDNA 483142619 gene (483142619Rik) mRNA.                                                        |
| sc0212377.14 6-S   | 0.76                | 1.04              | 1.12               | 0.73                  | 0.98                | 1.43                 | -0.09               | -0.09             | 0.36               | F730047E07Rik | NM_199467.1 | Mus musculus RIKEN cDNA F730047E07 gene (F730047E07Rik) mRNA.                                                      |
| sc0212427.1 238-S  | 0.92                | 1.07              | 1.14               | 0.95                  | 0.96                | 1.18                 | -0.03               | -0.15             | 0.05               | A730008H23    | NM_172501.1 | Mus musculus hypothetical protein A730008H23 (A730008H23) mRNA.                                                    |
| sc021351.9 194-S   | 0.93                | 1.07              | 1.27               | 0.86                  | 0.92                | 1.26                 | -0.12               | -0.23             | -0.01              | Tatd1         | NM_155131.1 | Mus musculus transducin delta 1 (Tatd1) mRNA.                                                                      |
| sc0213673.1 37-S   | 0.95                | 1.01              | 1.22               | 0.80                  | 0.85                | 1.24                 | -0.25               | -0.24             | 0.03               | 9530068E07Rik | NM_203329.2 | Mus musculus RIKEN cDNA 9530068E07 gene (9530068E07Rik) mRNA.                                                      |
| sc021371.3 17-S    | 1.00                | 1.05              | 1.31               | 0.81                  | 0.88                | 1.38                 | -0.31               | -0.25             | 0.08               | Tbca          | NM_009321.1 | Mus musculus tubulin cofactor a (Tbca) mRNA.                                                                       |
| sc0214489.1 247-S  | 0.96                | 1.01              | 1.18               | 0.82                  | 0.87                | 1.38                 | -0.22               | -0.22             | 0.23               | BC003965      | XM_128528.2 | Mus musculus cDNA sequence BC003965 (BC003965) mRNA.                                                               |
| sc0214505.1 41-S   | 0.98                | 1.08              | 1.20               | 0.92                  | 0.88                | 1.20                 | -0.09               | -0.27             | 0.00               | AU067744      | NM_172529.1 | Mus musculus expressed sequence AU067744 (AU067744) mRNA.                                                          |
| sc0214952.1 17-S   | 0.87                | 1.11              | 1.21               | 0.84                  | 0.88                | 1.16                 | -0.05               | -0.33             | -0.06              | Rho2          | NM_145999.2 | Mus musculus ras homolog gene family member T2 (Rho2) mRNA.                                                        |
| sc0215160.4 168-S  | 1.11                | 0.99              | 1.09               | 0.99                  | 0.77                | 0.99                 | -0.17               | -0.37             | -0.13              | Rhd17         | NM_146002.1 |                                                                                                                    |
| sc0215449.1 111-S  | 1.01                | 1.01              | 1.24               | 0.88                  | 1.11                | 1.11                 | -0.19               | -0.31             | -0.17              | Rap1b         | NM_045217.1 | Mus musculus RAS related protein 1b (Rap1b) mRNA.                                                                  |
| sc0216150.5 156-S  | 0.85                | 1.17              | 1.20               | 0.78                  | 0.90                | 1.30                 | -0.12               | -0.12             | 0.24               | Cdc34         | NM_177612.2 | Mus musculus cell division cycle 34 homolog (S. cerevisiae) (Cdc34) mRNA.                                          |
| sc0216222.2 35-S   | 1.00                | 1.00              | 1.10               | 0.94                  | 0.91                | 1.09                 | -0.09               | -0.14             | -0.02              | 4931440F15Rik | NM_176829.1 | Mus musculus RIKEN cDNA 4931440F15 gene (4931440F15Rik) mRNA.                                                      |
| sc0216767.5 8-S    | 0.84                | 1.01              | 1.22               | 0.77                  | 0.96                | 1.62                 | -0.13               | -0.06             | 0.41               | Mip22         | NM_175001.1 | Mus musculus mitochondrial ribosomal protein L22 (Mip22) mRNA.                                                     |
| sc0216792.1 314-S  | 0.70                | 1.01              | 1.07               | 0.58                  | 0.98                | 1.24                 | -0.27               | -0.05             | 0.22               | A230051G13Rik | NM_173785.2 |                                                                                                                    |
| sc0217365.1 17-S   | 0.86                | 1.08              | 1.32               | 0.71                  | 0.94                | 1.29                 | -0.27               | -0.20             | -0.02              | AK129375      | NM_199469.1 | Mus musculus cDNA sequence AK129375 (AK129375) mRNA.                                                               |
| sc021762.20 1-S    | 0.92                | 1.01              | 1.29               | 0.90                  | 0.96                | 1.53                 | -0.04               | -0.07             | 0.26               | Psm2          | NM_134101.1 | Mus musculus proteasome (prosome macropain) 26S subunit non-ATPase 2 (Psm2) mRNA.                                  |
| sc0217718.1 28-S   | 0.97                | 1.06              | 1.28               | 0.95                  | 0.96                | 1.34                 | -0.03               | -0.29             | 0.09               | Nkx2          | NM_145138.1 | Mus musculus NIMA (never in mitosis gene a)-related expressed kinase 9 (Nkx9) mRNA.                                |
| sc021804.1 211-S   | 1.05                | 1.02              | 0.99               | 0.80                  | 0.91                | 1.24                 | -0.06               | -0.42             | 0.11               | Tp51          | NM_009428.1 | Mus musculus transforming protein factor beta 1 induced transforming factor 2 (Tp51) mRNA.                         |
| sc0218333.1 228-S  | 0.95                | 1.11              | 1.33               | 0.78                  | 0.82                | 1.17                 | -0.28               | -0.42             | -0.17              | BC018507      | XM_358313.1 | Mus musculus cDNA sequence BC018507 (BC018507) mRNA.                                                               |
| sc021858.1 100-S   | 0.99                | 1.13              | 1.42               | 0.88                  | 0.76                | 1.28                 | -0.17               | -0.56             | -0.15              | Tim2p         | NM_011594.2 | Mus musculus tissue inhibitor of metalloproteinase 2 (Tim2p) mRNA.                                                 |
| sc021881.14 30-S   | 0.90                | 1.09              | 1.13               | 0.78                  | 1.04                | 1.36                 | -0.20               | -0.07             | 0.28               | Tkt           | NM_009388.2 | Mus musculus transketolase (Tkt) mRNA.                                                                             |
| sc021885.1 30-S    | 0.93                | 1.10              | 1.18               | 0.82                  | 0.96                | 1.48                 | -0.16               | -0.17             | 0.33               | Tie1          | NM_011599.2 | Mus musculus transducin-like enhancer of split 1 homolog of Drosophila E(spl) (Tie1) mRNA.                         |
| sc021888.8 148-S   | 0.94                | 1.03              | 1.18               | 0.80                  | 0.99                | 1.54                 | -0.23               | -0.06             | 0.39               | BC019806      | NM_145460   | Mus musculus cDNA sequence BC019806 (BC019806) mRNA.                                                               |
| sc0219158.1 104-S  | 1.01                | 1.04              | 1.24               | 0.76                  | 0.89                | 1.08                 | -0.45               | -0.21             | -0.20              | 2610301G19Rik | XM_355514.1 | Mus musculus RIKEN cDNA 2610301G19 gene (2610301G19Rik) mRNA.                                                      |
| sc021937.10 167-S  | 1.20                | 1.02              | 1.12               | 0.92                  | 0.72                | 0.98                 | -0.38               | -0.38             | 0.17               | Tnfrsf1a      | NM_045178.1 | Mus musculus tumor necrosis factor receptor superfamily member 1a (Tnfrsf1a) mRNA.                                 |
| sc021981.1 200-S   | 1.07                | 0.99              | 1.11               | 0.90                  | 0.79                | 1.22                 | -0.26               | -0.33             | 0.15               | Traf1         | NM_009415.1 |                                                                                                                    |
| sc022038.3 2-S     | 1.08                | 0.98              | 1.05               | 0.90                  | 0.82                | 1.20                 | -0.26               | -0.26             | 0.19               | Piscr1        | NM_011636.1 | Mus musculus phospholipid scramblase 1 (Piscr1) mRNA.                                                              |
| sc022088.2 10-S    | 0.88                | 1.07              | 1.40               | 0.80                  | 0.94                | 1.51                 | -0.17               | -0.19             | 0.11               | Tsg101        | NM_021884.1 | Mus musculus tumor susceptibility gene 101 (Tsg101) mRNA.                                                          |
| sc022121.1 118-S   | 0.76                | 1.01              | 1.29               | 0.67                  | 0.96                | 1.73                 | -0.19               | -0.07             | 0.42               | Rpl13a        | NM_009438   | Mus musculus ribosomal protein L13a (Rpl13a) mRNA.                                                                 |
| sc022130.13 33-S   | 0.97                | 1.02              | 1.10               | 0.97                  | 0.92                | 1.15                 | 0.00                | -0.15             | 0.06               | Tif1          | NM_009442.1 | Mus musculus transcription termination factor 1 (Tif1) mRNA.                                                       |
| sc022190.1 154-S   | 0.92                | 1.08              | 1.27               | 0.82                  | 0.94                | 1.40                 | -0.17               | -0.20             | 0.14               | Ubc           | XM_147315.1 | Mus musculus ubiquitin C (Ubc) mRNA.                                                                               |
| sc022192.1 214-S   | 0.98                | 1.08              | 1.08               | 0.82                  | 0.85                | 1.24                 | -0.01               | -0.35             | 0.01               | Ube2m         | NM_145318.1 | Mus musculus ubiquitin-conjugating enzyme E2M (UBC21 homolog yeast) (Ube2m) mRNA.                                  |
| sc022218.1 29-S    | 0.91                | 1.04              | 1.23               | 0.81                  | 0.95                | 1.43                 | -0.17               | -0.14             | 0.22               | Sumo1         | NM_009460.1 | Mus musculus ubiquitin-conjugating enzyme E2M (UBC21 homolog yeast) (Ube2m) mRNA.                                  |
| sc022224.14 3-S    | 0.82                | 1.03              | 1.22               | 0.69                  | 0.91                | 1.31                 | -0.26               | -0.19             | 0.11               | Usp10         | NM_009462.1 | Mus musculus ubiquitin specific protease 10 (Usp10) mRNA.                                                          |
| sc022240.3 34-S    | 1.20                | 0.96              | 1.06               | 0.98                  | 0.81                | 0.93                 | -0.29               | -0.22             | -0.19              | Dpy33         | NM_009468.1 | Mus musculus dihydropyrimidinase-like 3 (Dpy33) mRNA.                                                              |
| sc022262.6 54-S    | 0.99                | 1.03              | 1.09               | 0.86                  | 0.91                | 1.22                 | -0.20               | -0.18             | 0.18               | Usf2          | NM_011680.1 | Mus musculus upstream transcription factor 2 (Usf2) mRNA.                                                          |
| sc0223499.9 30-S   | 0.91                | 1.07              | 1.41               | 0.80                  | 0.89                | 1.44                 | -0.20               | -0.27             | 0.03               | Gm83          | NM_198606.1 | Mus musculus gene model 83 (NCBI) (Gm83) mRNA.                                                                     |
| sc0223670.1 36-S   | 0.95                | 1.09              | 1.04               | 0.81                  | 0.94                | 1.00                 | -0.23               | -0.22             | -0.06              | Senp1         | NM_144851.2 | Mus musculus SUMO1/sentrin specific protease 1 (Senp1) mRNA.                                                       |
| sc022438.3 214-S   | 0.71                | 1.03              | 1.03               | 0.72                  | 0.93                | 1.21                 | -0.03               | -0.02             | 0.03               | Xbl           | NM_025329.2 | Mus musculus McLeod syndrome gene homolog (Xbl) mRNA.                                                              |
| sc0224619.1 310-S  | 0.90                | 1.08              | 1.26               | 0.75                  | 0.80                | 1.13                 | -0.26               | -0.44             | -0.15              | Traf7         | NM_153792.1 |                                                                                                                    |
| sc0224742.1 82-S   | 0.91                | 1.08              | 1.29               | 0.88                  | 0.95                | 1.56                 | -0.05               | -0.18             | 0.29               | Abcf1         | NM_013854.1 | Mus musculus ATP-binding cassette sub-family F (GCN20) member 1 (Abcf1) mRNA.                                      |
| sc0225995.2 210-S  | 0.68                | 1.11              | 1.23               | 0.60                  | 0.95                | 1.41                 | -0.20               | -0.22             | 0.21               | D030056L22    | NM_177640.2 | Mus musculus hypothetical protein D030056L22 (D030056L22) mRNA.                                                    |
| sc0226026.1 6-S    | 0.75                | 1.04              | 1.22               | 0.63                  | 0.94                | 1.37                 | -0.27               | -0.15             | 0.18               | Smc5l1        | NM_153808.1 | Mus musculus SMC5 structural maintenance of chromosomes 5-like 1 (yeast) (Smc5l1) mRNA.                            |
| sc0226154.4 125-S  | 1.02                | 0.98              | 1.06               | 0.98                  | 0.79                | 1.14                 | -0.06               | -0.30             | 0.11               | Lts2          | NM_145503.1 | Mus musculus leucine zipper putative tumor suppressor 2 (Lts2) mRNA.                                               |
| sc022630.1 91-S    | 0.94                | 1.03              | 1.39               | 0.80                  | 0.98                | 1.70                 | -0.25               | -0.08             | 0.29               | Ywha          | NM_011739   | Mus musculus tyrosine 3-monooxygenase/tryptophan 3-monooxygenase activation protein theta polypeptide (Ywha) mRNA. |
| sc0227260.1 240-S  | 0.98                | 1.03              | 1.18               | 0.87                  | 0.80                | 1.24                 | -0.18               | -0.36             | 0.09               | Aamp          | NM_146110.1 | Mus musculus angio-associated migratory protein (Aamp) mRNA.                                                       |
| sc0227282.12 53-S  | 0.89                | 1.13              | 1.25               | 0.80                  | 0.75                | 1.14                 | -0.17               | -0.58             | -0.12              | Ctdsp1        | NM_153088.1 | Mus musculus CTD (carboxy-terminal domain RNA polymerase II) polypeptide A1 small phosphatase 1 (Ctdsp1) mRNA.     |
| sc022751.4 4-S     | 1.00                | 0.94              | 1.28               | 0.83                  | 0.77                | 1.11                 | -0.27               | -0.27             | -0.20              | Zfp60         | NM_011764.2 | Mus musculus zinc finger protein 90 (Zfp60) mRNA.                                                                  |
| sc0227746.1 159-S  | 0.99                | 0.96              | 1.13               | 0.80                  | 0.94                | 1.04                 | -0.31               | -0.03             | -0.12              | 9530020D24Rik | NM_145522.2 | Mus musculus RIKEN cDNA 9530020D24 gene (9530020D24Rik) mRNA.                                                      |
| sc0227929.1 2-S    | 0.96                | 1.10              | 1.27               | 0.80                  | 0.74                | 1.15                 | -0.26               | -0.55             | -0.15              | Picbpb        | NM_139200.2 | Mus musculus pleckstrin homology Sec7 and coiled-coil domains binding protein (Picbpb) mRNA.                       |
| sc0228019.1 0-S    | 0.92                | 1.04              | 1.07               | 0.77                  | 0.99                | 1.39                 | -0.26               | -0.07             | 0.38               | BC004636      | NM_145524.1 | Mus musculus cDNA sequence BC004636 (BC004636) mRNA.                                                               |
| sc0228410.3 8-S    | 0.89                | 1.08              | 1.12               | 0.79                  | 0.84                | 1.26                 | -0.17               | -0.35             | 0.18               | Cst3          | NM_145529.1 | Mus musculus cleavage stimulation factor 3 pre-RNA subunit 3 (Cst3) mRNA.                                          |
| sc0228714.3 276-S  | 0.93                | 1.07              | 1.20               | 0.85                  | 0.82                | 1.23                 | -0.13               | -0.38             | 0.04               | Carp2b        | NM_145717.2 | Mus musculus cysteine and glycine-rich protein 2 b (Carp2b) mRNA.                                                  |
| sc0228805.14 82-S  | 1.00                | 1.07              | 1.14               | 0.90                  | 0.85                | 1.05                 | -0.14               | -0.46             | -0.11              | Cst3          | NM_145529.1 | Mus musculus cleavage stimulation factor 3 pre-RNA subunit 3 (Cst3) mRNA.                                          |
| sc0229211.16 4-S   | 1.03                | 0.98              | 1.11               | 0.82                  | 0.91                | 1.22                 | -0.34               | -0.11             | 0.14               | Acad9         | NM_172678.2 | Mus musculus acyl-Coenzyme A dehydrogenase family member 9 (Acad9) mRNA.                                           |
| sc0229279.5 20-S   | 0.97                | 1.01              | 1.05               | 0.76                  | 0.88                | 1.39                 | -0.34               | -0.21             | 0.39               | 2610510D13Rik | NM_         |                                                                                                                    |

| Gene Name          | Control 18 Hours | Control 1 Week | Control 4 Weeks | Treatment 18 Hours | Treatment 1 Week | Treatment 4 Weeks | Log2 FC 18 Hours | Log2 FC 1 Week | Log2 FC 4 Weeks | Symbol        | Accession   | Definition                                                                                           |
|--------------------|------------------|----------------|-----------------|--------------------|------------------|-------------------|------------------|----------------|-----------------|---------------|-------------|------------------------------------------------------------------------------------------------------|
| sc023948.13_25-S   | 1.04             | 1.01           | 1.10            | 0.87               | 0.79             | 1.02              | -0.26            | -0.34          | -0.10           | Mmp17         | NM_011846   | Mus musculus matrix metalloproteinase 17 (Mmp17) mRNA.                                               |
| sc023980.1_2-S     | 1.01             | 1.04           | 1.11            | 0.82               | 0.83             | 1.35              | -0.33            | -0.33          | -0.23           | Pbp           | NM_018580.1 | Mus musculus phosphatidylethanolamine binding protein (Pbp) mRNA.                                    |
| sc024135.1_208-S   | 0.88             | 1.13           | 1.27            | 0.75               | 0.96             | 1.18              | -0.22            | -0.23          | -0.10           | Zfp668        | NM_013844.1 | Mus musculus zinc finger protein 668 (Zfp668) mRNA.                                                  |
| sc0242083.4_30-S   | 0.77             | 1.08           | 1.17            | 0.82               | 0.91             | 1.21              | 0.10             | -0.26          | 0.06            | Ppm1t         | NM_178726.1 | Mus musculus protein phosphatase 1 (formerly 2C) (like) (Ppm1t) mRNA.                                |
| sc0243484.1_330-S  | 0.85             | 1.08           | 1.34            | 0.87               | 0.85             | 1.33              | -0.13            | -0.33          | 0.03            | Ccdas         | NM_172297.1 | Mus musculus coiled coil domain containing 5 (Ccdas) mRNA.                                           |
| sc0245688.12_1-S   | 0.93             | 1.08           | 1.36            | 0.76               | 0.87             | 1.26              | -0.30            | -0.31          | -0.10           | Rbbp7         | NM_009031.2 | Mus musculus retinoblastoma binding protein 7 (Rbbp7) mRNA.                                          |
| sc0246707.2_7-S    | 0.81             | 1.11           | 1.17            | 0.88               | 1.00             | 1.24              | -0.25            | -0.14          | -0.11           | Emlin2        | NM_145158   | Mus musculus elastin microfibril interfacer 2 (Emlin2) mRNA.                                         |
| sc0246710.1_114-S  | 1.01             | 1.01           | 1.17            | 0.89               | 0.84             | 1.10              | -0.17            | -0.26          | -0.09           | Rhobtb2       | NM_153514.3 | Mus musculus Rho-related BTB domain containing 2 (Rhobtb2) mRNA.                                     |
| sc026374.20_270-S  | 0.84             | 1.08           | 1.19            | 0.74               | 0.91             | 1.36              | -0.18            | -0.25          | -0.09           | RpC8b79       | NM_011931   | Mus musculus expressed sequence C80879 (C80879) mRNA.                                                |
| sc026374.8_4-S     | 0.98             | 0.95           | 1.14            | 0.89               | 1.03             | 1.57              | -0.15            | -0.13          | 0.46            | C80879        | NM_011931.1 | Mus musculus expressed sequence C80879 (C80879) mRNA.                                                |
| sc026425.12_5-S    | 0.99             | 1.02           | 1.18            | 0.90               | 0.82             | 1.13              | -0.13            | -0.33          | -0.06           | Nuclp1        | NM_011955.1 | Mus musculus nucleotide binding protein 1 (Nuclp1) mRNA.                                             |
| sc026429.1_36.5-S  | 0.72             | 1.04           | 1.23            | 0.87               | 0.85             | 1.28              | -0.01            | -0.08          | 0.14            | Orc5l         | NM_019551.2 | Mus musculus origin recognition complex subunit 5 (like) (S. cerevisiae) (Orc5l) mRNA.               |
| sc026441.8_13-S    | 0.97             | 1.02           | 1.36            | 0.82               | 0.91             | 1.46              | -0.23            | -0.17          | 0.11            | Psmal3        | NM_011966   | Mus musculus proteasome (prosome macropain) subunit alpha type 4 (Psmal3) mRNA.                      |
| sc026446.4_108-S   | 0.94             | 1.01           | 1.31            | 0.84               | 0.89             | 1.52              | -0.15            | -0.19          | 0.21            | Psm3          | NM_011971.2 | Mus musculus proteasome (prosome macropain) subunit beta type 3 (Psm3) mRNA.                         |
| sc026451.5_30-S    | 0.95             | 1.13           | 1.22            | 0.91               | 0.88             | 1.22              | -0.06            | -0.35          | 0.00            | Rpl27a        | NM_011975.2 | Mus musculus ribosomal protein L27a (Rpl27a) mRNA.                                                   |
| sc0266449.4_2-S    | 0.88             | 1.08           | 1.41            | 0.73               | 0.92             | 1.49              | -0.26            | -0.24          | 0.08            | Rpl23a        | NM_207523   | Mus musculus ribosomal protein L23a (Rpl23a) mRNA.                                                   |
| sc0268490.8_24-S   | 0.98             | 0.99           | 1.05            | 0.86               | 0.93             | 1.25              | -0.19            | -0.10          | 0.25            | 2600001B17Rik | NM_172947.1 | Mus musculus cyclin B1 (Ccnb1) mRNA.                                                                 |
| sc0268697.4_6-S    | 0.88             | 1.03           | 1.19            | 0.54               | 0.98             | 1.36              | -0.32            | -0.05          | 0.20            | Ccnb1         | NM_172932.2 | Mus musculus cyclin B1 (Ccnb1) mRNA.                                                                 |
| sc0268991.10_188-S | 0.94             | 1.06           | 1.23            | 0.81               | 0.84             | 1.38              | -0.23            | -0.34          | 0.17            | Cops4         | NM_012003.1 | Mus musculus COP9 (consistive photomorphogen) homolog subunit 4 (Arabidopsis thaliana) (Cops4) mRNA. |
| sc0269399.1_1-S    | 0.84             | 1.12           | 1.38            | 0.71               | 0.95             | 1.38              | -0.25            | -0.23          | -0.02           | 6720461J16Rik | NM_175551.2 | Mus musculus RIKEN cDNA 6720461J16 gene (6720461J16Rik) mRNA.                                        |
| sc026940.2_4-S     | 0.96             | 0.97           | 1.13            | 0.97               | 0.82             | 1.20              | 0.01             | -0.24          | 0.09            | Silpec        | NM_012023.1 | Mus musculus signaling intermediate in Toll pathway-evolutionarily conserved (Silpec) mRNA.          |
| sc026987.6_0-S     | 1.01             | 0.96           | 1.16            | 0.84               | 0.88             | 1.40              | -0.27            | -0.12          | 0.28            | Eif4e3        | NM_023314.2 | Mus musculus eukaryotic translation initiation factor 4E like 3 (Eif4e3) mRNA.                       |
| sc027006.1_219-S   | 1.02             | 1.00           | 1.11            | 0.91               | 0.92             | 1.12              | -0.16            | -0.12          | 0.02            | 603045H405    | NM_177766.2 | Mus musculus hypothetical protein 603045H405 (603045H405) mRNA.                                      |
| sc0270106.4_75-S   | 0.93             | 1.15           | 1.38            | 0.81               | 0.90             | 1.44              | -0.20            | -0.35          | 0.07            | Rpl13         | NM_016738   | Mus musculus ribosomal protein L13 (Rpl13) mRNA.                                                     |
| sc027041.12_171-S  | 0.95             | 1.02           | 1.33            | 0.85               | 0.91             | 1.62              | -0.16            | -0.17          | 0.29            | G3bp          | NM_013716   | Mus musculus Ras-GTPase-activating protein SH3-domain binding protein (G3bp) mRNA.                   |
| sc02706829.28_30-S | 0.92             | 1.07           | 1.37            | 0.81               | 0.87             | 1.53              | -0.19            | -0.15          | 0.18            | Fhlhdc1       | NM_172382.2 | Mus musculus thioltransferase synthetase domain containing 1 (Fhlhdc1) mRNA.                         |
| sc027096.1_199-S   | 0.95             | 1.08           | 1.27            | 0.82               | 0.96             | 1.25              | -0.20            | -0.18          | -0.02           | Trappc3       | NM_017118.2 | Mus musculus trafficking protein particle complex 3 (Trappc3) mRNA.                                  |
| sc027176.1_29-S    | 0.89             | 1.01           | 1.37            | 0.76               | 0.94             | 1.60              | -0.22            | -0.10          | 0.22            | Rpl7a         | NM_013721   | Mus musculus ribosomal protein L7a (Rpl7a) mRNA.                                                     |
| sc0272027.1_270-S  | 1.00             | 1.15           | 1.25            | 0.90               | 0.87             | 1.27              | -0.13            | -0.38          | 0.03            | BC057893      | NM_173033.2 | Mus musculus ribosomal protein L3 (Rpl3) mRNA.                                                       |
| sc027367.2_7-S     | 0.91             | 1.10           | 1.25            | 0.85               | 0.88             | 1.24              | -0.11            | -0.32          | -0.01           | Rpl3          | NM_013762   | Mus musculus ribosomal protein L3 (Rpl3) mRNA.                                                       |
| sc027370.3_85-S    | 0.93             | 1.08           | 1.31            | 0.88               | 0.88             | 1.40              | -0.08            | -0.30          | 0.09            | Rps26         | NM_013765   | Mus musculus ribosomal protein S26 (Rps26) mRNA.                                                     |
| sc027643.2_36-S    | 0.97             | 1.02           | 1.11            | 0.91               | 0.84             | 1.27              | -0.08            | -0.29          | 0.20            | Uba4          | NM_145405.1 | Mus musculus ubiquitin-like 4 (Uba4) mRNA.                                                           |
| sc027677.10_104-S  | 0.94             | 1.05           | 1.37            | 0.79               | 0.88             | 1.34              | -0.26            | -0.26          | -0.04           | Eif5a         | NM_015922.2 | Mus musculus eukaryotic translation initiation factor 5A (Eif5a) mRNA.                               |
| sc027801.1_9-S     | 1.09             | 0.99           | 1.15            | 0.85               | 0.98             | 1.49              | -0.35            | -0.19          | 0.05            | Zab1b         | XM_388716.1 | Mus musculus zinc finger protein 1 (Zab1b) mRNA.                                                     |
| sc027867.3_2-S     | 0.97             | 1.08           | 1.23            | 0.83               | 0.92             | 1.32              | -0.23            | -0.22          | 0.11            | Cherp         | NM_138552.2 | Mus musculus calcium homeostasis endoplasmic reticulum protein (Cherp) mRNA.                         |
| sc027993.9_8-S     | 1.00             | 0.97           | 1.20            | 0.80               | 0.87             | 1.56              | -0.34            | -0.16          | 0.39            | D1Wsu40e      | NM_178601.2 | Mus musculus DNA segment Chr 1 Wayne State University 40 expressed (D1Wsu40e) mRNA.                  |
| sc030056.1_208-S   | 0.98             | 0.99           | 1.25            | 0.79               | 0.82             | 1.44              | -0.31            | -0.27          | 0.21            | Timm10        | NM_013896.2 | Mus musculus translocase of inner mitochondrial membrane 10 homolog (yeast) (Timm10) mRNA.           |
| sc030057.2_1-S     | 0.87             | 1.06           | 1.35            | 0.74               | 0.97             | 1.75              | -0.23            | -0.12          | 0.36            | Timm8b        | NM_013897.1 | Mus musculus translocase of inner mitochondrial membrane 8 homolog b (yeast) (Timm8b) mRNA.          |
| sc030926.11_17-S   | 1.05             | 0.99           | 1.27            | 0.83               | 0.87             | 1.10              | -0.33            | -0.18          | -0.21           | Txn12         | NM_023140.3 | Mus musculus thioredoxin-like 2 (Txn12) mRNA.                                                        |
| sc030931.1_245-S   | 0.97             | 1.04           | 1.21            | 0.81               | 0.83             | 1.10              | -0.26            | -0.32          | -0.14           | Dyt1          | NM_146841.1 | Mus musculus dystonia 1 (Dyt1) mRNA.                                                                 |
| sc030933.5_3-S     | 1.04             | 1.04           | 1.08            | 0.80               | 0.96             | 1.09              | -0.23            | -0.45          | 0.15            | Tor2a         | NM_152800.1 | Mus musculus torian family 2 member A (Tor2a) mRNA.                                                  |
| sc031926.2_123-S   | 0.99             | 1.02           | 1.12            | 0.90               | 0.75             | 1.11              | -0.13            | -0.44          | -0.01           | A13001J15Rik  | NM_181048.2 | Mus musculus RIKEN cDNA A13001J15 gene (A13001J15Rik) mRNA.                                          |
| sc0319475.1_238-S  | 0.74             | 1.08           | 1.18            | 0.57               | 0.95             | 1.03              | -0.37            | -0.18          | -0.17           | 4930488P06Rik | NM_178611.2 | Mus musculus RIKEN cDNA 4930488P06 gene (4930488P06Rik) mRNA.                                        |
| sc0320139.8_83-S   | 1.04             | 1.00           | 1.28            | 0.93               | 0.85             | 1.17              | -0.16            | -0.23          | -0.13           | Pipn7         | NM_177081.2 | Mus musculus RIKEN cDNA A730089K16 gene (A730089K16Rik) mRNA.                                        |
| sc0320411.1_266-S  | 0.63             | 1.01           | 1.14            | 0.62               | 1.04             | 1.43              | -0.03            | 0.05           | 0.34            | A730089K16Rik | NM_177156.2 | Mus musculus RIKEN cDNA A730089K16 gene (A730089K16Rik) mRNA.                                        |
| sc0326618.9_77-S   | 0.97             | 1.07           | 1.22            | 0.84               | 0.78             | 1.23              | -0.21            | -0.43          | 0.02            | Tpm4          | XM_134274.3 | Mus musculus phosphatidylinositol glycan class L (Pigl) mRNA.                                        |
| sc0327942.7_271-S  | 0.99             | 1.06           | 1.10            | 0.88               | 0.89             | 1.19              | -0.18            | -0.25          | 0.12            | Pig           | NM_190205.1 | Mus musculus phosphatidylinositol glycan class L (Pigl) mRNA.                                        |
| sc0328526.4_134-S  | 0.95             | 1.11           | 1.22            | 0.78               | 0.91             | 1.16              | -0.28            | -0.28          | -0.13           | C2828526      | XM_286572.2 | Mus musculus cyclin T1 (Ccn1) mRNA.                                                                  |
| sc0328601.1_103-S  | 0.77             | 1.02           | 1.19            | 0.68               | 0.94             | 1.38              | -0.18            | -0.12          | 0.22            | Ccn1          | XM_286572.2 | Mus musculus cyclin T1 (Ccn1) mRNA.                                                                  |
| sc0329002.1_2-S    | 0.92             | 1.12           | 1.27            | 0.77               | 0.91             | 1.16              | -0.25            | -0.29          | -0.12           | Zfp236        | NM_177832.2 | Mus musculus zinc finger protein 236 (Zfp236) mRNA.                                                  |
| sc0330260.1_61-S   | 0.95             | 1.12           | 1.26            | 0.84               | 0.94             | 1.45              | -0.18            | -0.24          | 0.21            | Pon2          | NM_183308.1 | Mus musculus paroxanase 2 (Pon2) mRNA.                                                               |
| sc0337802.3_30-S   | 0.96             | 1.10           | 1.19            | 0.90               | 0.86             | 1.13              | -0.09            | -0.35          | -0.06           | Ser12         | NM_011354.1 | Mus musculus small EDRK-rich factor 2 (Ser12) mRNA.                                                  |
| sc0338060.1_239-S  | 0.85             | 1.09           | 1.27            | 0.69               | 0.96             | 1.49              | -0.30            | -0.18          | 0.24            | C78212        | NM_198176.1 | Mus musculus expressed sequence C78212 (C78212) mRNA.                                                |
| sc03380773.4_2-S   | 0.98             | 1.00           | 1.17            | 0.81               | 0.88             | 1.12              | -0.26            | -0.20          | -0.06           | 1810035L17Rik | XM_354684.1 | Mus musculus expressed sequence AU067695 (AU067695) mRNA.                                            |
| sc03381802.12_9-S  | 1.00             | 1.00           | 1.08            | 0.85               | 0.85             | 1.30              | -0.24            | -0.14          | 0.00            | 180633.1      | NM_201410   | Mus musculus expressed sequence AU067695 (AU067695) mRNA.                                            |
| sc0339435.7_126-S  | 1.02             | 1.01           | 1.23            | 0.91               | 0.70             | 1.21              | -0.17            | -0.53          | -0.03           | Ugt1a6        | NM_020410   | Mus musculus F-box and WD-40 domain protein 7 archipelago homolog (Drosophila) (Fbw7) mRNA.          |
| sc050754.10_4-S    | 0.96             | 1.14           | 1.15            | 0.87               | 0.89             | 1.08              | -0.15            | -0.36          | -0.10           | Fbw7          | NM_080428.2 | Mus musculus Bcl-2-related ovarian killer protein (Bok) mRNA.                                        |
| sc051800.6_308-S   | 0.98             | 1.12           | 1.22            | 0.90               | 0.82             | 1.22              | -0.12            | -0.43          | 0.00            | Bok           | NM_016778   | Mus musculus DNA segment Chr 2 ERATO D01 435 expressed (D2Ernt435e) mRNA.                            |
| sc051885.18_22-S   | 0.84             | 0.98           | 1.16            | 0.81               | 1.02             | 1.40              | -0.06            | 0.05           | 0.28            | D2Ernt435e    | NM_153387   | Mus musculus DNA segment Chr 17 ERATO D01 441 expressed (D17Ernt441e) mRNA.                          |
| sc052009.2_30-S    | 0.95             | 0.96           | 1.17            | 0.80               | 1.00             | 1.37              | -0.25            | 0.06           | 0.23            | D17Ernt441e   | NM_198937.1 | Mus musculus DNA segment Chr 5 ERATO D01 33 expressed (U5Ernt33e) mRNA.                              |
| sc052064.7_271-S   | 0.94             | 1.03           | 1.26            | 0.79               | 0.92             | 1.45              | -0.25            | -0.16          | 0.22            | U5Ernt33e     | NM_026504.1 | Mus musculus DNA segment Chr 8 ERATO D01 354 expressed (D8Ernt354e) mRNA.                            |
| sc052120.1_108-S   | 0.99             | 1.08           | 1.14            | 0.85               | 0.89             | 1.06              | -0.21            | -0.51          | -0.08           | U5Ernt33e     | NM_133970.1 | Mus musculus DNA segment Chr 8 ERATO D01 354 expressed (D8Ernt354e) mRNA.                            |
| sc052170.5_1-S     | 1.09             | 1.08           | 1.07            | 0.93               | 0.90             | 0.99              | -0.23            | -0.25          | -0.11           | Gpr172b       | NM_029643.2 | Mus musculus DNA segment Chr 10 ERATO D01 718 expressed (D10Ernt718e) mRNA.                          |
| sc052713.2_45-S    | 0.94             | 1.06           | 1.21            | 0.81               | 0.88             | 1.15              | -0.21            | -0.26          | -0.08           | D10Ernt718e   | NM_025602.1 | Mus musculus nuclear RNA export factor 1 homolog (S. cerevisiae) (Nxf1) mRNA.                        |
| sc053319.21_22-S   | 0.90             | 1.11           | 1.25            | 0.77               | 0.89             | 1.51              | -0.24            | -0.31          | 0.28            | Nxf1          | NM_016813.2 | Mus musculus small nuclear ribonucleoprotein polypeptide A (Snrap) mRNA.                             |
| sc053607.7_2-S     | 0.98             | 1.00           | 0.99            | 0.93               | 1.08             | 1.44              | -0.07            | 0.12           | 0.55            | Snrap         | NM_015782.2 | Mus musculus cyclin-dependent kinase-like 2 (CDC2-related kinase) (Cdk2) mRNA.                       |
| sc053886.1_142-S   | 1.07             | 1.03           | 1.11            | 0.91               | 0.86             | 1.00              | -0.23            | -0.24          | -0.14           | Cdk2          | NM_177270.3 | Mus musculus activating transcription factor 7 interacting protein (Ait7p) mRNA.                     |
| sc054343.15_6-S    | 0.86             | 1.10           | 1.23            | 0.71               | 0.99             | 1.31              | -0.28            | -0.15          | 0.10            | Ait7p         | NM_019426.2 | Mus musculus palmitoyl protein thioesterase 2 (Ppt2) mRNA.                                           |
| sc054397.1_307-S   | 1.04             | 0.98           | 1.19            | 0.84               | 0.96             | 1.16              | -0.32            | -0.48          | 0.04            | Ppt2          | NM_019441   | Mus musculus toll interacting protein (Tollip) mRNA.                                                 |
| sc054473.1_6-S     | 0.96             | 1.06           | 1.07            | 0.98               | 0.96             | 1.16              | 0.02             | -0.14          | 0.11            | Tollip        | NM_023764.2 | Mus musculus suppressor of cytokine signaling 6 (Socs6) mRNA.                                        |
| sc054607.1_75-S    | 0.96             | 1.06           | 1.13            | 0.86               | 0.90             | 1.28              | -0.16            | -0.24          | 0.18            | Socs6         | NM_018821.2 | Mus musculus exostoses (multiple)-like 3 (Ext3) mRNA.                                                |
| sc054616.1_2-S     | 0.91             | 1.24           | 1.34            | 0.89               | 0.93             | 1.42              | -0.04            | -0.38          | 0.08            | Ext3          | NM_018788.2 | Mus musculus deafness autosomal dominant 5 homolog (human) (Dfna5h) mRNA.                            |
| sc054722.1_159-S   | 1.19             | 1.13           | 0.92            | 0.98               | 1.01             | 0.92              | -0.28            | -0.17          | -0.01           | Dfna5h        | XM_147318.1 | Mus musculus eukaryotic translation elongation factor 1 beta 2 (Eef1b2) mRNA.                        |
| sc055949.3_17-S    | 0.96             | 1.07           | 1.39            | 0.84               | 0.86             | 1.45              | -0.19            | -0.32          | 0.05            | Eef1b2        | NM_018796.2 | Mus musculus inositol (myo)-1(or 4)-monophosphatase 1 (Impa1) mRNA.                                  |
| sc055980.1_58-S    | 1.00             | 1.00           | 1.30            | 0.76               | 0.87             | 1.17              | -0.39            | -0.34          | -0.16           | Impa1         | NM_018864.3 | Mus musculus Down syndrome critical region homolog 2 (human) (Dscr2) mRNA.                           |
| sc055988.2_324-S   | 0.96             | 1.02           | 1.16            | 0.80               | 0.82             | 1.48              | -0.26            | -0.22          | 0.05            | Dscr2         | NM_019537.1 | Mus musculus ADP-ribosylation factor-like 6 interacting protein 2 (Ar6ip2) mRNA.                     |
| sc056278.9_3-S     | 1.07             | 1.07           | 1.17            | 0.95               | 0.89             | 1.05              | -0.16            | -0.12          | 0.05            | Ar6ip2        | NM_018922.2 | Mus musculus RIKEN cDNA 1500030C03 gene (1500030C03Rik) mRNA.                                        |
| sc056298.1_121-S   | 0.76             | 1.06           | 1.29            | 0.65               | 0.92             | 1.20              | -0.23            | -0.21          | -0.10           | Ar6ip2        | NM_178050.2 | Mus musculus ubiquitin-conjugating enzyme E2D 2 (Ube2d) mRNA.                                        |
| sc056334.4_3-S     | 0.87             | 0.99           | 1.27            | 0.79               | 0.94             | 1.79              | -0.14            | -0.07          | 0.49            | 1110032D12Rik | NM_019770   | Mus musculus RIKEN cDNA 120002A08 gene (120002                                                       |

| Gene Name          | Control 18 Hours | Control 1 Week | Control 4 Weeks | Treatment 18 Hours | Treatment 1 Week | Treatment 4 Weeks | Log2 FC 18 Hours | Log2 FC 1 Week | Log2 FC 4 Weeks | Symbol        | Accession   | Definition                                                                                                |                                                                       |
|--------------------|------------------|----------------|-----------------|--------------------|------------------|-------------------|------------------|----------------|-----------------|---------------|-------------|-----------------------------------------------------------------------------------------------------------|-----------------------------------------------------------------------|
| scd059013.8 10-S   | 0.94             | 0.97           | 1.20            | 0.80               | 0.99             | 1.73              | -0.23            | 0.04           | 0.53            | Hnrph1        | NM_021510.1 | Mus musculus heterogeneous nuclear ribonucleoprotein H1 (Hnrph1) mRNA.                                    |                                                                       |
| scd059022.3 20-S   | 0.90             | 1.03           | 1.14            | 0.83               | 0.93             | 1.30              | -0.12            | -0.14          | 0.20            | Edf1          | NM_021519.1 | Mus musculus endothelial differentiation-related factor 1 (Edf1) mRNA.                                    |                                                                       |
| scd059038.1 0-S    | 0.91             | 1.08           | 1.08            | 0.85               | 0.87             | 1.05              | -0.10            | -0.32          | -0.03           | Pmp4          | NM_021534.2 | Mus musculus peroxisomal membrane protein 4 (Pmp4) mRNA.                                                  |                                                                       |
| scd059040.12 45-S  | 0.99             | 1.04           | 1.21            | 0.86               | 0.91             | 1.31              | -0.20            | -0.19          | 0.11            | Rho1          | NM_021536.5 | Mus musculus ras homolog gene family member 1 (Rho1) mRNA.                                                |                                                                       |
| scd059042.7 8-S    | 0.97             | 0.98           | 1.10            | 0.86               | 0.81             | 1.23              | -0.03            | -0.30          | 0.16            | Cocp3         | NM_021538.1 | Mus musculus coxsomal protein complex subunit 3 (Cocp3) mRNA.                                             |                                                                       |
| scd059048.1 115-S  | 0.92             | 1.07           | 1.09            | 0.77               | 0.89             | 1.08              | -0.24            | -0.28          | 0.03            | 1500002011Rik | NM_021550.2 | Mus musculus RIKEN cDNA 150002011 gene (150002011Rik) mRNA.                                               |                                                                       |
| scd059050.2 22-S   | 0.88             | 1.10           | 1.30            | 0.79               | 0.84             | 1.31              | -0.16            | -0.38          | 0.01            | 5730427N09Rik | NM_021552.1 | Mus musculus RIKEN cDNA 5730427N09 gene (5730427N09Rik) mRNA.                                             |                                                                       |
| scd064656.5 1-S    | 0.91             | 1.03           | 1.27            | 0.76               | 0.78             | 1.42              | -0.26            | -0.41          | 0.16            | Mps23         | NM_024174.4 | Mus musculus mitochondrial ribosomal protein S23 (Mps23) mRNA.                                            |                                                                       |
| scd064660.1 30-S   | 0.91             | 1.05           | 1.14            | 0.84               | 0.89             | 1.28              | -0.12            | -0.25          | 0.17            | Mps24         | NM_026060.1 | Mus musculus mitochondrial ribosomal protein S24 (Mps24) mRNA.                                            |                                                                       |
| scd065019.1 21-S   | 0.98             | 1.06           | 1.22            | 0.89               | 0.87             | 1.13              | -0.13            | -0.29          | -0.10           | Rpl23         | NM_022891.1 | Mus musculus ribosomal protein L23 (Rpl23) mRNA.                                                          |                                                                       |
| scd065111.1 137-S  | 0.81             | 1.05           | 1.20            | 0.75               | 0.91             | 1.39              | -0.11            | -0.22          | 0.23            | Dap3          | NM_022994.2 | Mus musculus death associated protein 3 (Dap3) mRNA.                                                      |                                                                       |
| scd065046.6 22-S   | 0.99             | 1.09           | 1.10            | 0.85               | 0.81             | 1.09              | -0.30            | -0.26          | 0.07            | Ndufb5        | NM_025351.3 | Mus musculus NADH dehydrogenase (ubiquinone) 1 beta subcomplex 5 (Ndufb5) mRNA.                           |                                                                       |
| scd065073.8 269-S  | 1.05             | 1.02           | 1.20            | 0.87               | 0.75             | 1.10              | -0.28            | -0.45          | -0.13           | 0610040B21Rik | NM_025334.2 | Mus musculus RIKEN cDNA 0610040B21 gene (0610040B21Rik) mRNA.                                             |                                                                       |
| scd066094.3 4-S    | 0.93             | 1.10           | 1.37            | 0.75               | 0.88             | 1.65              | -0.30            | -0.17          | 0.26            | Lsm7          | NM_025349.1 | Mus musculus LSM7 homolog U6 small nuclear RNA associated (S. cerevisiae) (Lsm7) mRNA.                    |                                                                       |
| scd066108.3 20-S   | 0.91             | 1.05           | 1.19            | 0.77               | 0.89             | 1.41              | -0.23            | -0.24          | 0.25            | Ndufa9        | NM_025358.1 | Mus musculus NADH dehydrogenase (ubiquinone) 1 alpha subcomplex 9 (Ndufa9) mRNA.                          |                                                                       |
| scd066144.2 329-S  | 0.99             | 1.08           | 1.26            | 0.89               | 0.78             | 1.22              | -0.15            | -0.46          | -0.05           | Alp6v11       | NM_025381.1 | Mus musculus ATPase H+ transporting V1 subunit F (Alp6v11) mRNA.                                          |                                                                       |
| scd066151.5 253-S  | 1.03             | 1.04           | 1.21            | 0.89               | 0.81             | 1.24              | -0.20            | -0.35          | 0.04            | 1110020C13Rik | NM_025385.2 | Mus musculus RIKEN cDNA 1110020C13 gene (1110020C13Rik) mRNA.                                             |                                                                       |
| scd066154.6 169-S  | 0.85             | 1.07           | 1.18            | 0.57               | 1.01             | 1.54              | -0.18            | -0.07          | 0.40            | Tmem14c       | NM_025387.1 | Mus musculus RIKEN cDNA 1110017C15Rik                                                                     |                                                                       |
| scd066164.1 0-S    | 1.03             | 0.99           | 1.25            | 0.86               | 0.90             | 1.45              | -0.25            | -0.13          | 0.22            | 110017C15Rik  | NM_025398.1 | Mus musculus RIKEN cDNA 1110017C15 gene (1110017C15Rik) mRNA.                                             |                                                                       |
| scd066190.1 22-S   | 1.01             | 1.01           | 1.21            | 0.79               | 0.81             | 1.23              | -0.38            | -0.32          | 0.03            | Phca          | NM_025408.1 | Mus musculus phytylceramide alkaline (Phca) mRNA.                                                         |                                                                       |
| scd066192.2 27-S   | 0.88             | 1.02           | 1.24            | 0.78               | 0.99             | 1.44              | -0.18            | -0.04          | 0.21            | 1110049G11Rik | NM_025410.1 | Mus musculus RIKEN cDNA 1110049G11 gene (1110049G11Rik) mRNA.                                             |                                                                       |
| scd066229.1 118-S  | 0.94             | 1.04           | 1.23            | 0.86               | 0.88             | 1.46              | -0.14            | -0.24          | 0.24            | 1500016H10Rik | NM_025433.2 | Mus musculus RIKEN cDNA 1500016H10 gene (1500016H10Rik) mRNA.                                             |                                                                       |
| scd066231.1 62-S   | 0.82             | 1.07           | 1.14            | 0.73               | 0.97             | 1.33              | -0.17            | -0.14          | 0.22            | 1500006C09Rik | XM_147163.1 | Mus musculus RIKEN cDNA 1500006C09 gene (1500006C09Rik) mRNA.                                             |                                                                       |
| scd066258.4 19-S   | 0.93             | 1.04           | 1.22            | 0.87               | 0.88             | 1.36              | -0.11            | -0.23          | 0.15            | Mps17         | NM_025450.1 | Mus musculus mitochondrial ribosomal protein S17 (Mps17) mRNA.                                            |                                                                       |
| scd066276.2 21-S   | 0.95             | 0.99           | 1.29            | 0.84               | 1.03             | 1.87              | -0.17            | 0.06           | 0.53            | 1810009A15Rik | NM_025463.1 | Mus musculus RIKEN cDNA 1810009A15 gene (1810009A15Rik) mRNA.                                             |                                                                       |
| scd066292.2 43-S   | 0.88             | 1.08           | 1.25            | 0.80               | 0.85             | 1.51              | -0.13            | -0.18          | 0.28            | Mrr21         | NM_025479.2 | Mus musculus mitochondrial rRNA 21S (Mrr21) mRNA.                                                         |                                                                       |
| scd066310.2 4-S    | 0.85             | 1.01           | 1.25            | 0.74               | 1.01             | 1.68              | -0.20            | 0.00           | 0.00            | 2810410M20Rik | NM_024429.2 | Mus musculus RIKEN cDNA 2810410M20 gene (2810410M20Rik) mRNA.                                             |                                                                       |
| scd066359.2 17-S   | 0.81             | 1.04           | 1.26            | 0.70               | 0.92             | 1.45              | -0.21            | -0.18          | 0.21            | 2310005N03Rik | NM_025511.1 | Mus musculus RIKEN cDNA 2310005N03 gene (2310005N03Rik) mRNA.                                             |                                                                       |
| scd066361.1 72-S   | 1.02             | 0.99           | 1.27            | 0.84               | 0.74             | 1.11              | -0.27            | -0.44          | -0.19           | 2310008M20Rik | NM_025512.2 | Mus musculus RIKEN cDNA 2310008M20 gene (2310008M20Rik) mRNA.                                             |                                                                       |
| scd066375.2 40-S   | 0.98             | 1.14           | 1.19            | 0.89               | 0.82             | 1.14              | -0.13            | -0.47          | -0.05           | Dhrs7         | NM_025521.1 | Mus musculus dehydrogenase/reductase (SDR family) member 7 (Dhrs7) mRNA.                                  |                                                                       |
| scd066390.1 295-S  | 0.93             | 1.05           | 1.29            | 0.78               | 0.95             | 1.45              | -0.26            | -0.16          | 0.17            | 2310042G06Rik | NM_025531.2 | Mus musculus RIKEN cDNA 2310042G06 gene (2310042G06Rik) mRNA.                                             |                                                                       |
| scd066412.2 22-S   | 0.98             | 1.01           | 1.21            | 0.98               | 0.70             | 1.16              | 0.01             | -0.52          | -0.06           | Arrod4        | NM_025549.1 | Mus musculus arrestin domain containing 4 (Arrod4) mRNA.                                                  |                                                                       |
| scd066416.3 90-S   | 0.92             | 1.10           | 1.26            | 0.87               | 0.85             | 1.32              | -0.09            | -0.36          | 0.08            | Ndufa7        | NM_025622.2 | Mus musculus NADH dehydrogenase (ubiquinone) 1 alpha subcomplex 7 (B14.5a) (Ndufa7) mRNA.                 |                                                                       |
| scd066445.5 4-S    | 0.94             | 1.01           | 1.25            | 0.83               | 0.94             | 1.56              | -0.18            | -0.09          | 0.18            | Cyt1          | NM_025667.1 | Mus musculus cytochrome c-1 (Cyt1) mRNA.                                                                  |                                                                       |
| scd066448.4 32-S   | 0.93             | 1.06           | 1.24            | 0.77               | 0.92             | 1.42              | -0.27            | -0.20          | 0.20            | Mp120         | NM_025570.1 | Mus musculus mitochondrial ribosomal protein L20 (Mp120) mRNA.                                            |                                                                       |
| scd066480.2 3-S    | 0.93             | 1.05           | 1.17            | 0.81               | 0.84             | 1.24              | -0.19            | -0.32          | 0.08            | Rpl15         | NM_025586.1 | Mus musculus ribosomal protein L15 (Rpl15) mRNA.                                                          |                                                                       |
| scd066487.1 1-S    | 0.92             | 1.13           | 1.35            | 0.84               | 0.91             | 1.27              | -0.13            | -0.31          | -0.08           | 2010107H07Rik | XM_354800.1 | Mus musculus RIKEN cDNA 2010107H07 gene (2010107H07Rik) mRNA.                                             |                                                                       |
| scd066489.3 56-S   | 0.99             | 1.08           | 1.21            | 0.78               | 0.89             | 1.28              | -0.18            | -0.27          | 0.08            | Rpl35         | NM_025592.1 | Mus musculus ribosomal protein L35 (Rpl35) mRNA.                                                          |                                                                       |
| scd066508.5 236-S  | 1.01             | 1.01           | 1.22            | 0.87               | 0.88             | 1.18              | -0.23            | -0.19          | -0.05           | 2400001E08Rik | NM_025605.1 | Mus musculus RIKEN cDNA 2400001E08 gene (2400001E08Rik) mRNA.                                             |                                                                       |
| scd066530.2 0-S    | 0.99             | 1.07           | 1.13            | 0.94               | 0.83             | 1.15              | -0.08            | -0.36          | 0.03            | Ubx1          | NM_025611.1 | Mus musculus UBX domain containing 1 (Ubx1) mRNA.                                                         |                                                                       |
| scd066576.4 1-S    | 0.98             | 1.01           | 1.39            | 0.77               | 0.98             | 1.48              | -0.04            | -0.04          | 0.08            | Ube2v1        | NM_025642.2 | Mus musculus ubiquitin-conjugating enzyme E2 variant 1 (Ube2v1) mRNA.                                     |                                                                       |
| scd066589.4 10-S   | 0.96             | 0.93           | 1.07            | 0.84               | 0.83             | 0.97              | 1.67             | -0.17          | -0.15           | 0.32          | Ube2v1      | NM_023230.1                                                                                               | Mus musculus ubiquitin-conjugating enzyme E2 variant 1 (Ube2v1) mRNA. |
| scd066612.1 144-S  | 0.69             | 1.06           | 1.18            | 0.67               | 0.91             | 1.33              | -0.05            | -0.22          | 0.18            | Ormd3         | NM_025661.1 | Mus musculus ORM1-like 3 (S. cerevisiae) (Ormd3) mRNA.                                                    |                                                                       |
| scd066659.9 78-S   | 0.99             | 1.04           | 1.19            | 0.97               | 0.89             | 1.28              | -0.03            | -0.21          | 0.10            | Acp6          | NM_019800.1 | Mus musculus acid phosphatase 6 lysophosphatidic (Acp6) mRNA.                                             |                                                                       |
| scd066680.1 207-S  | 0.90             | 1.17           | 1.30            | 0.81               | 0.83             | 1.17              | -0.15            | -0.49          | -0.15           | 3230401D17Rik | NM_025699.2 | Mus musculus RIKEN cDNA 3230401D17 gene (3230401D17Rik) mRNA.                                             |                                                                       |
| scd066840.3 20-S   | 1.05             | 1.10           | 1.09            | 0.93               | 0.93             | 0.96              | -0.17            | -0.24          | -0.18           | 0610008N23Rik | NM_025793.1 | Mus musculus mitochondrial ribosomal protein L33 (Mpr33) mRNA.                                            |                                                                       |
| scd066845.4 127-S  | 0.93             | 1.05           | 1.21            | 0.82               | 0.87             | 1.39              | -0.18            | -0.27          | 0.00            | Mpr33         | NM_025796.1 | Mus musculus mitochondrial ribosomal protein L33 (Mpr33) mRNA.                                            |                                                                       |
| scd066869.1 6-S    | 1.01             | 1.12           | 1.19            | 0.85               | 0.82             | 1.10              | -0.28            | -0.42          | 0.12            | 1200403E16Rik | NM_025841.1 | Mus musculus RIKEN cDNA 1200403E16 gene (1200403E16Rik) mRNA.                                             |                                                                       |
| scd066917.11 233-S | 0.76             | 1.01           | 1.11            | 0.82               | 0.98             | 1.33              | -0.28            | 0.00           | 0.77            | Chordc1       | NM_025844.1 | Mus musculus cysteine and histidine-rich domain (CHORD)-containing zinc-binding protein 1 (Chordc1) mRNA. |                                                                       |
| scd066942.2 30-S   | 0.88             | 1.06           | 1.37            | 0.77               | 0.89             | 1.69              | -0.18            | -0.25          | 0.31            | Ddx18         | NM_025860   | Mus musculus DEAD (Asp-Glu-Ala-Asp) box polypeptide 18 (Ddx18) mRNA.                                      |                                                                       |
| scd066953.9 91-S   | 0.97             | 1.12           | 1.42            | 0.75               | 0.97             | 1.64              | -0.37            | -0.19          | 0.24            | Cdc47         | NM_025866.1 | Mus musculus cell division cycle associated 7 (Cdc47) mRNA.                                               |                                                                       |
| scd066989.6 1-S    | 0.97             | 1.09           | 1.12            | 0.83               | 0.94             | 1.09              | -0.23            | -0.21          | -0.03           | 2410004N11Rik | NM_025888.2 | Mus musculus RIKEN cDNA 2410004N11 gene (2410004N11Rik) mRNA.                                             |                                                                       |
| scd066989.6 85-S   | 0.95             | 1.04           | 1.17            | 0.84               | 0.94             | 1.40              | -0.18            | -0.15          | 0.26            | 2410004N11Rik | NM_025888.2 | Mus musculus RIKEN cDNA 2410004N11 gene (2410004N11Rik) mRNA.                                             |                                                                       |
| scd067025.2 6-S    | 0.95             | 1.09           | 1.31            | 0.81               | 0.90             | 1.32              | -0.22            | -0.27          | 0.01            | Rpl11         | NM_025919   | Mus musculus ribosomal protein L11 (Rpl11) mRNA.                                                          |                                                                       |
| scd067067.1 49-S   | 0.93             | 1.02           | 1.28            | 0.77               | 0.81             | 1.31              | -0.22            | -0.22          | 0.18            | 2010100C12Rik | NM_025919.2 | Mus musculus RIKEN cDNA 2010100C12 gene (2010100C12Rik) mRNA.                                             |                                                                       |
| scd067078.2 14-S   | 0.97             | 1.08           | 1.16            | 0.63               | 0.94             | 1.37              | -0.09            | -0.20          | 0.24            | 1700012G19Rik | NM_025954.2 | Mus musculus RIKEN cDNA 1700012G19 gene (1700012G19Rik) mRNA.                                             |                                                                       |
| scd067097.5 20-S   | 0.91             | 1.06           | 1.30            | 0.79               | 0.97             | 1.40              | -0.21            | -0.13          | 0.11            | Rps10         | NM_025963   | Mus musculus ribosomal protein S10 (Rps10) mRNA.                                                          |                                                                       |
| scd067105.6 6-S    | 0.90             | 0.94           | 1.21            | 0.90               | 1.00             | 1.59              | 0.00             | 0.08           | 0.40            | 1700034H14Rik | NM_025969.1 | Mus musculus RIKEN cDNA 1700034H14 gene (1700034H14Rik) mRNA.                                             |                                                                       |
| scd067134.7 2-S    | 0.98             | 1.02           | 1.31            | 0.82               | 0.95             | 1.67              | -0.26            | -0.10          | 0.36            | Nol5a         | NM_024193.1 | Mus musculus nucleolar protein 5A (Nol5a) mRNA.                                                           |                                                                       |
| scd067150.2 3-S    | 0.99             | 0.99           | 1.04            | 0.85               | 1.00             | 1.21              | -0.23            | 0.02           | 0.22            | Rnf141        | NM_025999.1 | Mus musculus ring finger protein 141 (Rnf141) mRNA.                                                       |                                                                       |
| scd067153.8 8-S    | 0.63             | 1.03           | 1.27            | 0.59               | 0.99             | 1.56              | -0.09            | -0.04          | 0.30            | 2610207P08Rik | XM_127466.2 | Mus musculus RIKEN cDNA 2610207P08 gene (2610207P08Rik) mRNA.                                             |                                                                       |
| scd067160.10 33-S  | 0.85             | 1.06           | 1.25            | 0.83               | 0.81             | 1.37              | -0.22            | -0.10          | 0.07            | Edf1          | NM_025997.1 | Mus musculus eukaryotic translation elongation factor 1 gamma (Edf1) mRNA.                                |                                                                       |
| scd067210.1 15-S   | 0.89             | 1.03           | 1.19            | 0.81               | 0.96             | 1.44              | -0.14            | -0.11          | 0.29            | Odas          | NM_026033.1 | Mus musculus ocular development associated gene (Odas) mRNA.                                              |                                                                       |
| scd067211.6 180-S  | 0.99             | 1.10           | 1.26            | 0.84               | 0.76             | 1.19              | -0.22            | -0.53          | -0.08           | 2810037C14Rik | NM_026034.1 | Mus musculus RIKEN cDNA 2810037C14 gene (2810037C14Rik) mRNA.                                             |                                                                       |
| scd067248.2 33-S   | 0.95             | 1.07           | 1.35            | 0.86               | 0.90             | 1.37              | -0.16            | -0.26          | 0.01            | Rpl39         | NM_026055.1 | Mus musculus ribosomal protein L39 (Rpl39) mRNA.                                                          |                                                                       |
| scd067267.4 0-S    | 0.98             | 1.00           | 1.23            | 0.85               | 0.97             | 1.39              | -0.22            | -0.05          | 0.17            | 2900010M23Rik | NM_026063.1 | Mus musculus RIKEN cDNA 2900010M23 gene (2900010M23Rik) mRNA.                                             |                                                                       |
| scd067270.3 15-S   | 0.96             | 0.95           | 1.16            | 0.80               | 0.89             | 1.53              | -0.27            | -0.09          | 0.39            | D10End322e    | NM_026065.2 | Mus musculus RIKEN cDNA 2900010M23 gene (2900010M23Rik) mRNA.                                             |                                                                       |
| scd067283.1 285-S  | 1.01             | 1.07           | 1.25            | 0.89               | 0.88             | 1.28              | -0.19            | -0.28          | 0.04            | Sic25a19      | NM_026071.1 | Mus musculus solute carrier family 25 (mitochondrial deoxynucleotide carrier) member 19 (Sic25a19) mRNA.  |                                                                       |
| scd067332.3 15-S   | 0.93             | 1.00           | 1.38            | 0.77               | 0.86             | 1.81              | -0.29            | 0.09           | 0.12            | Snp33         | NM_026096.3 | Mus musculus small nuclear ribonucleoprotein D3 (Snp33) mRNA.                                             |                                                                       |
| scd067397.1 307-S  | 0.98             | 1.03           | 1.16            | 0.87               | 0.91             | 1.33              | -0.19            | -0.18          | 0.21            | Erp29         | NM_026129.2 | Mus musculus endoplasmic reticulum protein 29 (Erp29) mRNA.                                               |                                                                       |
| scd067414.12 0-S   | 0.94             | 1.06           | 1.13            | 0.84               | 0.95             | 1.25              | -0.16            | -0.15          | 0.15            | Mfn1          | NM_024200.2 | Mus musculus mitofusin 1 (Mfn1) mRNA.                                                                     |                                                                       |
| scd067526.1 122-S  | 0.98             | 1.06           | 1.29            | 0.83               | 0.86             | 1.28              | -0.25            | -0.30          | -0.01           | App12l        | NM_026217.1 | Mus musculus autophagy 12-like (S. cerevisiae) (App12l) mRNA.                                             |                                                                       |
| scd067529.1 0-S    | 0.95             | 0.94           | 1.07            | 0.84               | 1.07             | 1.07              | -0.18            | -0.20          | 0.00            | Fgfr1op2      | NM_026218.1 | Mus musculus FGFR1 oncogene partner 2 (Fgfr1op2) mRNA.                                                    |                                                                       |
| scd067549.1 82-S   | 0.98             | 1.04           | 1.10            | 0.91               | 0.90             | 1.17              | -0.10            | -0.21          | 0.10            | Gpr89         | NM_026229.1 | Mus musculus GPR89                                                                                        |                                                                       |
| scd067561.1 259-S  | 1.02             | 1.01           | 1.30            | 0.79               | 0.79             | 1.14              | -0.36            | -0.34          | -0.09           | 4930451A13Rik | NM_026254.2 | Mus musculus RIKEN cDNA 4930451A13 gene (4930451A13Rik) mRNA.                                             |                                                                       |
| scd067567.2 1-S    | 0.76             | 1.02           | 1.35            | 0.62               | 0.89             | 1.38              | -0.04            | -0.06          | 0.26            | 4930562C03Rik | XM_134612   |                                                                                                           |                                                                       |

| Gene Name          | Control 18 Hours | Control 1 Week | Control 4 Weeks | Treatment 18 Hours | Treatment 1 Week | Treatment 4 Weeks | Log2 FC 18 Hours | Log2 FC 1 Week | Log2 FC 4 Weeks | Symbol         | Accession       | Definition                                                                                                        |
|--------------------|------------------|----------------|-----------------|--------------------|------------------|-------------------|------------------|----------------|-----------------|----------------|-----------------|-------------------------------------------------------------------------------------------------------------------|
| scd068092.4 14-S   | 0.90             | 1.04           | 1.25            | 0.75               | 0.97             | 1.74              | -0.26            | -0.10          | 0.47            | Ncbp2          | NM_026554.2     | Mus musculus nuclear cap binding protein subunit 2 (Ncbp2) mRNA.                                                  |
| scd068098.1 43-S   | 0.88             | 1.07           | 1.38            | 0.78               | 0.93             | 1.32              | -0.18            | -0.19          | -0.06           | Rchy1          | NM_026557.1     | Mus musculus ring finger and CHY zinc finger domain containing 1 (Rchy1) mRNA.                                    |
| scd068115.4 19-S   | 0.94             | 1.03           | 1.19            | 0.85               | 0.94             | 1.34              | -0.15            | -0.12          | 0.14            | 9430016H08Rik  | XM_283579.2     | Mus musculus RIKEN cDNA 9430016H08 gene (9430016H08Rik) mRNA.                                                     |
| scd068142.2 67-S   | 0.95             | 1.08           | 1.18            | 0.80               | 0.85             | 1.06              | -0.25            | -0.34          | -0.17           | 4632409L19Rik  | XM_353576.1     | Mus musculus RIKEN cDNA 4632409L19 gene (4632409L19Rik) mRNA.                                                     |
| scd068172.1 36-S   | 1.08             | 1.01           | 1.22            | 0.81               | 0.83             | 1.12              | -0.43            | -0.27          | -0.15           | Ebp3           | NM_026581.1     | Mus musculus emaggen binding protein-like (Ebp3) mRNA.                                                            |
| scd068193.4 35-S   | 0.95             | 1.08           | 1.22            | 0.77               | 0.88             | 1.35              | -0.30            | -0.30          | 0.15            | Rpl24          | NM_024218.2     | Mus musculus ribosomal protein L24 (Rpl24) mRNA.                                                                  |
| scd068195.1 129-S  | 0.98             | 1.07           | 1.31            | 0.92               | 0.79             | 1.35              | -0.10            | -0.43          | 0.05            | Rnasel2        | NM_026611.1     | Mus musculus ribonuclease T2 (Rnasel2) mRNA.                                                                      |
| scd068240.2 29-S   | 0.71             | 1.05           | 1.32            | 0.64               | 0.97             | 1.71              | -0.17            | -0.11          | 0.37            | Rpa3           | NM_026632.1     | Mus musculus replication protein A3 (Rpa3) mRNA.                                                                  |
| scd068267.1 94-S   | 1.05             | 0.97           | 1.14            | 0.90               | 0.79             | 0.99              | -0.24            | -0.28          | -0.20           | Scic25a22      | NM_026664.1     | Mus musculus solute carrier family 25 (mitochondrial carrier: glutamate) member 22 (Scic25a22) mRNA.              |
| scd068337.8 322-S  | 0.94             | 1.05           | 1.42            | 0.76               | 0.83             | 1.41              | -0.31            | -0.34          | -0.01           | Crip2          | NM_024223.1     | Mus musculus cysteine rich protein 2 (Crip2) mRNA.                                                                |
| scd068349.3 1-S    | 0.89             | 1.06           | 1.29            | 0.73               | 0.87             | 1.44              | -0.27            | -0.30          | 0.17            | Ndufs3         | NM_130347.1     | Mus musculus NADH dehydrogenase (ubiquinone) Fe-S protein 3 (Ndufs3) mRNA.                                        |
| scd068365.1 174-S  | 1.02             | 1.01           | 1.22            | 0.81               | 0.85             | 1.17              | -0.38            | -0.34          | 0.17            | Rab14          | NM_026672.2     | Mus musculus Rab14 member RAS oncogene family (Rab14) mRNA.                                                       |
| scd068377.10 23-S  | 0.97             | 0.98           | 1.27            | 0.85               | 1.00             | 1.57              | -0.17            | 0.03           | 0.32            | Acta2          | NM_007392.2     | Mus musculus RIKEN cDNA 0610041G09 gene (0610041G09Rik) mRNA.                                                     |
| scd068505.1 329-S  | 1.00             | 1.08           | 1.14            | 0.91               | 0.79             | 1.05              | -0.13            | -0.44          | -0.10           | 1110014N23Rik  | XM_283543.2     |                                                                                                                   |
| scd068520.7 219-S  | 0.96             | 1.18           | 1.20            | 0.99               | 0.88             | 1.32              | 0.05             | -0.42          | 0.15            | Zlyve21        | NM_026752.2     | Mus musculus zinc finger FYVE domain containing 21 (Zlyve21) mRNA.                                                |
| scd068523.5 22-S   | 0.91             | 0.97           | 1.20            | 0.77               | 0.97             | 1.58              | -0.26            | 0.01           | 0.40            | 1110019N10Rik  | NM_026753.1     | Mus musculus RIKEN cDNA 1110019N10 gene (1110019N10Rik) mRNA.                                                     |
| scd068544.3 98-S   | 0.83             | 1.02           | 1.22            | 0.77               | 0.93             | 1.36              | -0.12            | -0.13          | 0.15            | 2310036C022Rik | NM_026760.1     |                                                                                                                   |
| scd068574.4 100-S  | 1.00             | 1.03           | 1.31            | 0.84               | 0.90             | 1.27              | -0.26            | -0.18          | -0.04           | Hwap           | XM_131076.1     |                                                                                                                   |
| scd068581.2 286-S  | 0.97             | 1.11           | 1.25            | 0.86               | 0.86             | 1.28              | -0.16            | -0.35          | 0.03            | 1110014C03Rik  | NM_026752.2     | Mus musculus RIKEN cDNA 1110014C03 gene (1110014C03Rik) mRNA.                                                     |
| scd068618.1 97-S   | 1.02             | 0.96           | 1.05            | 0.96               | 0.85             | 1.31              | -0.08            | -0.18          | 0.33            | 1110012L19Rik  | NM_026787.1     | Mus musculus RIKEN cDNA 1110012L19 gene (1110012L19Rik) mRNA.                                                     |
| scd068735.6 63-S   | 0.85             | 1.08           | 1.24            | 0.74               | 0.96             | 1.35              | -0.21            | -0.16          | 0.14            | Mps18c         | XM_194230.6     |                                                                                                                   |
| scd068763.4 12-S   | 0.98             | 0.97           | 1.26            | 0.78               | 0.91             | 1.60              | -0.33            | -0.09          | 0.35            | 1110038B12Rik  | NM_359415.1     | Mus musculus RIKEN cDNA 1110038B12 gene (1110038B12Rik) mRNA.                                                     |
| scd068877.8 322-S  | 0.87             | 1.11           | 1.30            | 0.80               | 0.91             | 1.39              | -0.13            | -0.29          | 0.10            | Mal1           | NM_026859.2     | Mus musculus MAF1 homolog (yeast) (Mal1) mRNA.                                                                    |
| scd068897.1 240-S  | 1.01             | 1.01           | 1.11            | 0.89               | 0.76             | 1.03              | -0.17            | -0.39          | -0.11           | Disp1          | NM_026866       | Mus musculus dispatched homolog 1 (Drosophila) (Disp1) mRNA.                                                      |
| scd068938.13 42-S  | 0.98             | 1.19           | 1.18            | 0.86               | 0.80             | 1.15              | -0.13            | -0.58          | -0.03           | Aspcr1         | NM_026877.1     | Mus musculus alveolar soft part sarcoma chromosome region candidate 1 (human) (Aspcr1) transcript variant 1 mRNA. |
| scd068942.2 5-S    | 0.91             | 1.07           | 1.17            | 0.85               | 0.93             | 1.09              | -0.11            | -0.36          | -0.10           | Pink1          | NM_026888       | Mus musculus PTEN induced putative kinase 1 (Pink1) mRNA.                                                         |
| scd068944.7 11-S   | 0.93             | 1.08           | 1.31            | 0.88               | 0.96             | 1.40              | -0.26            | -0.34          | 0.13            | 4930403C006Rik | NM_026881.1     |                                                                                                                   |
| scd069010.2 129-S  | 0.95             | 1.08           | 1.28            | 0.81               | 0.88             | 1.20              | -0.23            | -0.29          | -0.09           | Anapc13        | NM_181394.1     |                                                                                                                   |
| scd069038.2 4-S    | 0.95             | 1.02           | 1.26            | 0.79               | 0.89             | 1.38              | -0.28            | -0.20          | 0.13            | 1810006K21Rik  | NM_207074       | Mus musculus RIKEN cDNA 1810006K21 gene (1810006K21Rik) mRNA.                                                     |
| scd069257.1 70-S   | 0.89             | 1.08           | 1.38            | 0.71               | 0.93             | 1.28              | -0.33            | -0.21          | -0.10           | Eif2           | NM_023502.1     | Mus musculus E74-like factor 2 (Eif2) mRNA.                                                                       |
| scd069263.1 9-S    | 0.84             | 1.02           | 1.02            | 0.75               | 1.01             | 1.23              | -0.16            | -0.02          | 0.28            | Rlc3           | XM_132528.3     | Mus musculus replication factor C (activator 1) 3 (Rlc3) mRNA.                                                    |
| scd069367.4 58-S   | 0.99             | 1.03           | 1.21            | 0.83               | 0.86             | 1.26              | -0.26            | -0.26          | 0.06            | Glr2           | NM_023505.1     | Mus musculus glutaredoxin 2 (thioltransferase) (Glr2) mRNA.                                                       |
| scd069435.3 112-S  | 0.99             | 1.11           | 1.29            | 0.90               | 0.82             | 1.34              | -0.06            | -0.27          | 0.17            | 1700023M03Rik  | NM_027078.1     | Mus musculus RIKEN cDNA 1700023M03 gene (1700023M03Rik) mRNA.                                                     |
| scd069451.3 127-S  | 0.99             | 1.05           | 1.25            | 0.88               | 0.91             | 1.13              | -0.13            | -0.13          | 0.25            | Trnfaf13       | NM_026871.1     | Mus musculus tumor necrosis factor (ligand) superfamily member 13 (Trnfaf13) mRNA.                                |
| scd069668.1 14-S   | 1.01             | 1.00           | 1.25            | 0.89               | 0.76             | 1.17              | -0.21            | -0.41          | -0.10           | 2310061I09Rik  | XM_128811.2     | Mus musculus RIKEN cDNA 2310061I09 gene (2310061I09Rik) mRNA.                                                     |
| scd069713.3 39-S   | 0.87             | 1.05           | 1.26            | 0.71               | 0.95             | 1.45              | -0.29            | -0.16          | 0.21            | Pin4           | NM_135990       | Mus musculus protein (peptidyl-prolyl cis/trans isomerase) NIMA-interacting 4 (parvulin) (Pin4) mRNA.             |
| scd069790.3 16-S   | 0.91             | 1.07           | 1.29            | 0.77               | 0.86             | 1.45              | -0.24            | -0.32          | 0.16            | Thrap6         | NM_027212.1     | Mus musculus thyroid hormone receptor associated protein 6 (Thrap6) mRNA.                                         |
| scd069875.2 16-S   | 0.93             | 1.07           | 1.28            | 0.80               | 0.92             | 1.52              | -0.20            | -0.21          | 0.24            | Ndufaf1        | XM_128696.1     |                                                                                                                   |
| scd069940.12 93-S  | 0.99             | 1.06           | 1.22            | 0.83               | 0.83             | 1.24              | -0.25            | -0.35          | 0.03            | 2810407P21Rik  | XM_132150.5     |                                                                                                                   |
| scd070333.1 1119-S | 0.94             | 0.99           | 1.12            | 0.80               | 0.94             | 1.07              | -0.21            | -0.24          | -0.05           | Asat           | NM_145622.1     |                                                                                                                   |
| scd070438.20 280-S | 0.97             | 1.01           | 1.17            | 0.89               | 0.96             | 1.26              | -0.13            | -0.06          | 0.12            | Poikb          | NM_027423.1     |                                                                                                                   |
| scd070510.9 205-S  | 0.93             | 1.17           | 1.40            | 0.82               | 0.92             | 1.52              | -0.17            | -0.33          | 0.12            | 5730404B10Rik  | NM_027445.2     |                                                                                                                   |
| scd070544.3 53-S   | 0.97             | 0.99           | 1.22            | 0.94               | 0.82             | 1.43              | -0.05            | -0.27          | 0.23            | 5730437N04Rik  | NM_027457.2     | Mus musculus RIKEN cDNA 5730437N04 gene (5730437N04Rik) mRNA.                                                     |
| scd070612.1 126-S  | 0.98             | 1.06           | 1.26            | 0.81               | 0.80             | 1.11              | -0.27            | -0.40          | -0.17           | 5730494N06Rik  | NM_027478.1     | Mus musculus RIKEN cDNA 5730494N06 gene (5730494N06Rik) mRNA.                                                     |
| scd071679.3 0-S    | 0.81             | 1.06           | 1.25            | 0.70               | 0.97             | 1.40              | -0.21            | -0.12          | 0.17            | Atp5b          | NM_027862       | Mus musculus ATP synthase H+ transporting mitochondrial F0 complex subunit d (Atp5b) mRNA.                        |
| scd071743.9 29-S   | 0.99             | 1.02           | 1.11            | 0.95               | 0.82             | 1.27              | -0.06            | -0.31          | 0.20            | Coasy          | NM_027896.1     | Mus musculus Coenzyme A synthase (Coasy) mRNA.                                                                    |
| scd071782.13 18-S  | 0.90             | 1.08           | 1.17            | 0.75               | 0.91             | 1.44              | -0.27            | -0.25          | -0.05           | 05e1en565a     | NM_027922.1     |                                                                                                                   |
| scd071841.3 29-S   | 0.95             | 1.01           | 1.20            | 0.85               | 0.88             | 1.42              | -0.15            | -0.20          | 0.23            | 2310051N18Rik  | XM_134036.4     | Mus musculus RIKEN cDNA 2310051N18 gene (2310051N18Rik) mRNA.                                                     |
| scd071857.16 20-S  | 0.86             | 1.04           | 1.10            | 0.86               | 0.99             | 1.30              | -0.01            | -0.07          | 0.25            | 2410006F12Rik  | NM_028020.2     | Mus musculus RIKEN cDNA 2410006F12 gene (2410006F12Rik) mRNA.                                                     |
| scd072042.2 8-S    | 1.24             | 1.03           | 1.18            | 1.06               | 0.70             | 0.98              | -0.24            | -0.56          | -0.26           | Colt1          | NM_150115.1     | Mus musculus coactosin-like 1 (Drosophila) (Colt1) mRNA.                                                          |
| scd072050.3 4-S    | 1.06             | 1.00           | 1.10            | 0.89               | 0.90             | 1.25              | -0.27            | -0.15          | 0.19            | Kdelc1         | NM_023645.2     | Mus musculus KDEL (Lys-Asp-Glu-Leu) containing 1 (Kdelc1) mRNA.                                                   |
| scd072151.1 272-S  | 0.89             | 1.03           | 1.17            | 0.77               | 0.99             | 1.46              | -0.20            | -0.05          | 0.32            | Rlc5           | NM_132348.2     | Mus musculus replication factor C (activator 1) 5 (Rlc5) mRNA.                                                    |
| scd072195.1 127-S  | 0.97             | 1.08           | 1.11            | 0.90               | 0.88             | 1.17              | -0.11            | -0.30          | 0.08            | 2610524B01Rik  | XM_355594       | Mus musculus RIKEN cDNA 2610524B01 gene (2610524B01Rik) mRNA.                                                     |
| scd072465.7 112-S  | 0.81             | 1.07           | 1.28            | 0.71               | 0.98             | 1.38              | -0.20            | -0.13          | 0.11            | Zfp131         | NM_028451.1     | Mus musculus zinc finger protein 131 (Zfp131) mRNA.                                                               |
| scd072584.1 284-S  | 0.87             | 1.04           | 1.08            | 0.87               | 0.88             | 1.75              | -0.21            | -0.16          | 0.15            | Cul4b          | NM_028463.1     | Mus musculus cullin 4B (Cul4b) mRNA.                                                                              |
| scd072649.1 11-S   | 0.92             | 1.05           | 1.28            | 0.77               | 0.85             | 1.24              | -0.26            | -0.31          | -0.05           | 2700094F01Rik  | NM_178625.3     | Mus musculus RIKEN cDNA 2700094F01 gene (2700094F01Rik) mRNA.                                                     |
| scd072795.9 17-S   | 1.01             | 1.02           | 1.24            | 0.93               | 0.84             | 1.17              | -0.12            | -0.28          | -0.09           | Tlc19          | NM_028360.1     |                                                                                                                   |
| scd072826.1 101-S  | 0.96             | 1.16           | 1.59            | 0.74               | 0.92             | 1.43              | -0.38            | -0.32          | -0.15           | 2810485I05Rik  | NM_176836.2     | Mus musculus RIKEN cDNA 2810485I05 gene (2810485I05Rik) mRNA.                                                     |
| scd073024.7 20-S   | 0.94             | 1.02           | 1.24            | 0.80               | 0.83             | 1.20              | -0.23            | -0.29          | -0.05           | 2900064A13Rik  | NM_133749.1     | Mus musculus RIKEN cDNA 2900064A13 gene (2900064A13Rik) mRNA.                                                     |
| scd073122.1 292-S  | 1.03             | 1.07           | 1.22            | 0.91               | 0.95             | 1.39              | -0.19            | -0.17          | 0.20            | 3110018K12Rik  | XM_129857.4     | Mus musculus RIKEN cDNA 3110018K12 gene (3110018K12Rik) mRNA.                                                     |
| scd073373.8 41-S   | 0.85             | 1.06           | 1.35            | 0.75               | 0.97             | 1.41              | -0.17            | -0.13          | 0.07            | 1700048E23Rik  | NM_028521.1     | Mus musculus RIKEN cDNA 1700048E23 gene (1700048E23Rik) mRNA.                                                     |
| scd073376.1 29-S   | 0.87             | 1.01           | 1.25            | 0.74               | 0.84             | 1.42              | -0.24            | -0.11          | 0.24            | 1110086Z4Rik   | XM_1110086Z4Rik | Mus musculus RIKEN cDNA 1110086Z4Rik gene (1110086Z4Rik) mRNA.                                                    |
| scd073737.1 120-S  | 0.91             | 1.05           | 1.19            | 0.82               | 0.83             | 1.13              | -0.16            | -0.34          | -0.08           | 1110008P14Rik  | NM_189001.1     | Mus musculus RIKEN cDNA 1110008P14 gene (1110008P14Rik) mRNA.                                                     |
| scd074026.3 179-S  | 0.97             | 1.10           | 1.20            | 0.88               | 0.90             | 1.13              | -0.14            | -0.28          | -0.09           | 4121402D02Rik  | NM_028722.1     | Mus musculus RIKEN cDNA 4121402D02 gene (4121402D02Rik) mRNA.                                                     |
| scd074440.16 72-S  | 0.84             | 1.08           | 1.12            | 0.71               | 0.91             | 1.09              | -0.24            | -0.24          | -0.04           | 4933407C03Rik  | XM_356109.1     | Mus musculus RIKEN cDNA 4933407C03 gene (4933407C03Rik) mRNA.                                                     |
| scd074479.1 19-S   | 1.01             | 1.04           | 1.32            | 0.86               | 0.90             | 1.44              | -0.24            | -0.21          | 0.13            | Snx11          | NM_028965.2     | Mus musculus sorting nexin 11 (Snx11) mRNA.                                                                       |
| scd074522.7 319-S  | 0.94             | 1.07           | 1.27            | 0.86               | 0.91             | 1.29              | -0.14            | -0.24          | 0.02            | Zcwc1          | NM_198162.1     | Mus musculus zinc finger CW-type with coiled-coil domain 1 (Zcwc1) mRNA.                                          |
| scd074569.1 282-S  | 0.98             | 1.07           | 1.19            | 0.84               | 0.93             | 1.15              | -0.22            | -0.20          | -0.04           | Tlc17          | NM_183106.1     |                                                                                                                   |
| scd074761.10 0-S   | 0.99             | 1.02           | 1.09            | 0.92               | 0.77             | 1.04              | -0.10            | -0.39          | -0.07           | 1200013A06Rik  | NM_029131.1     | Mus musculus RIKEN cDNA 1200013A06 gene (1200013A06Rik) mRNA.                                                     |
| scd074562.2 116-S  | 0.90             | 1.04           | 1.33            | 0.73               | 0.93             | 1.69              | -0.29            | -0.16          | 0.35            | 1700029F09Rik  | XM_355303.1     | Mus musculus RIKEN cDNA 1700029F09 gene (1700029F09Rik) mRNA.                                                     |
| scd075909.1 96-S   | 0.89             | 1.04           | 1.27            | 0.83               | 0.99             | 1.47              | -0.11            | -0.07          | 0.21            | 4930579A11Rik  | NM_029478.2     | Mus musculus RIKEN cDNA 4930579A11 gene (4930579A11Rik) mRNA.                                                     |
| scd076073.9 113-S  | 0.87             | 1.05           | 1.15            | 0.74               | 0.89             | 1.29              | -0.23            | -0.24          | 0.17            | 0610009F02Rik  | NM_029508.1     |                                                                                                                   |
| scd076193.1 200-S  | 0.83             | 1.01           | 1.08            | 0.75               | 0.99             | 1.33              | -0.15            | -0.03          | 0.30            | 6330562C20Rik  | XM_358602.1     |                                                                                                                   |
| scd076281.4 19-S   | 1.03             | 1.05           | 1.21            | 0.92               | 0.81             | 1.15              | -0.16            | -0.36          | -0.08           | Tart1bp3       | NM_029564       |                                                                                                                   |
| scd076478.1 164-S  | 0.93             | 0.89           | 1.11            | 0.80               | 0.94             | 1.32              | -0.23            | -0.08          | 0.25            | 2410004L22Rik  | NM_029621.1     | Mus musculus RIKEN cDNA 2410004L22 gene (2410004L22Rik) mRNA.                                                     |
| scd076559.1 202-S  | 0.90             | 1.06           | 1.22            | 0.76               | 0.97             | 1.19              | -0.25            | -0.29          | 0.19            | 2410024A21Rik  | NM_029642.1     | Mus musculus RIKEN cDNA 2410024A21 gene (2410024A21Rik) mRNA.                                                     |
| scd076808.4 30-S   | 0.95             | 1.08           | 1.37            | 0.82               | 0.85             | 1.25              | -0.21            | -0.35          | -0.13           | Rpl18a         | NM_194410.2     |                                                                                                                   |
| scd076893.11 90-S  | 0.98             | 1.00           | 1.38            | 0.79               |                  |                   |                  |                |                 |                |                 |                                                                                                                   |

| Gene Name           | Control<br>18 Hours | Control<br>1 Week | Control<br>4 Weeks | Treatment<br>18 Hours | Treatment<br>1 Week | Treatment<br>4 Weeks | Log2 FC<br>18 Hours | Log2 FC<br>1 Week | Log2 FC<br>4 Weeks | Symbol         | Accession   | Definition                                                                                                       |
|---------------------|---------------------|-------------------|--------------------|-----------------------|---------------------|----------------------|---------------------|-------------------|--------------------|----------------|-------------|------------------------------------------------------------------------------------------------------------------|
| sd11702.1.1-1-S     | 0.82                | 1.08              | 1.29               | 0.72                  | 0.86                | 1.46                 | -0.20               | -0.33             | 0.18               | BC002199       | NM_145964.1 | Mus musculus cDNA sequence BC002199 (BC002199) mRNA.                                                             |
| sd15816.17.1-26-S   | 0.98                | 0.96              | 1.16               | 1.00                  | 0.84                | 1.28                 | 0.03                | -0.19             | 0.14               | Capn2          | NM_009794.1 | Mus musculus calpain 2 (Capn2) mRNA.                                                                             |
| sd15890.11.1-26-S   | 0.95                | 1.04              | 1.22               | 0.81                  | 0.90                | 1.00                 | -0.24               | -0.21             | -0.14              | Fh1            | NM_010209   | Mus musculus fumurate hydratase 1 (Fh1) mRNA.                                                                    |
| sd15941.6.1-27-S    | 0.96                | 1.03              | 1.17               | 0.86                  | 0.96                | 1.38                 | -0.17               | -0.10             | 0.24               | Ndufs2         | NM_153064.3 | Mus musculus NADH dehydrogenase (ubiquinone) Fe-S protein 2 (Ndufs2) mRNA.                                       |
| sd15987.1.1-28-S    | 0.96                | 1.03              | 1.07               | 0.86                  | 0.95                | 1.31                 | -0.17               | -0.17             | 0.01               | A481316        | XM_148961.3 | Mus musculus expressed sequence A481316 (A481316) mRNA.                                                          |
| sd16146.28-80-S     | 1.19                | 1.03              | 1.13               | 1.00                  | 0.84                | 0.96                 | -0.26               | -0.28             | -0.23              | Lamc1          | NM_010583   | Mus musculus laminin gamma 1 (Lamc1) mRNA.                                                                       |
| sd16289.14.1-134-S  | 1.07                | 1.09              | 1.00               | 1.00                  | 0.83                | 0.96                 | -0.09               | -0.40             | -0.06              | Sox13          | NM_011439.1 | Mus musculus SRY-box containing gene 13 (Sox13) mRNA.                                                            |
| sd16332.2-164-S     | 0.67                | 1.21              | 1.23               | 0.57                  | 0.82                | 1.27                 | -0.25               | -0.57             | 0.04               | Cxcr4          | NM_009911.2 | Mus musculus chemokine (C-X-C motif) receptor 4 (Cxcr4) mRNA.                                                    |
| sd16334.7.1-2-S     | 0.91                | 1.02              | 1.11               | 0.85                  | 1.01                | 1.50                 | -0.10               | -0.01             | 0.44               | Dars           | NM_145507.1 | Mus musculus aspartyl-tRNA synthetase (Dars) mRNA.                                                               |
| sd16375.7-22-S      | 1.04                | 1.02              | 1.08               | 0.93                  | 0.84                | 1.20                 | -0.16               | -0.29             | 0.15               | Dbi            | NM_007830.2 | Mus musculus diazepam binding inhibitor (Dbi) mRNA.                                                              |
| sd16390.3-3-S       | 1.09                | 0.93              | 1.05               | 0.96                  | 0.69                | 1.01                 | -0.18               | -0.42             | -0.05              | Rab1           | NM_023327.3 | Mus musculus diaphanous related protein 1 (Dpr1) mRNA.                                                           |
| sd16414.3-484-144-S | 1.01                | 1.07              | 1.16               | 0.88                  | 0.95                | 1.31                 | -0.21               | -0.17             | 0.50               | Fv1            | XM_205132.3 | Mus musculus vral simian leukemia viral oncogene homolog B (ras related) (Rab1) mRNA.                            |
| sd16469.4.1-83-S    | 0.99                | 1.02              | 1.20               | 0.83                  | 0.84                | 1.15                 | -0.27               | -0.28             | -0.06              | 1110002M09Rik  | XM_129957.1 | Mus musculus RIKEN cDNA 1110002M09 gene (1110002M09Rik) mRNA.                                                    |
| sd16476.4-568-S     | 0.99                | 1.06              | 1.18               | 0.89                  | 0.79                | 1.14                 | -0.17               | -0.42             | -0.05              | Hes6           | NM_019479.2 | Mus musculus hairy and enhancer of split 6 (Drosophila) (Hes6) mRNA.                                             |
| sd16583.17.10-2-S   | 0.98                | 1.05              | 1.23               | 0.93                  | 0.94                | 1.51                 | -0.08               | -0.16             | 0.31               | Fars1b         | NM_011811.2 | Mus musculus phenylalanine-tRNA synthetase-like beta subunit (Fars1b) mRNA.                                      |
| sd16732.7.1-6-S     | 0.95                | 1.06              | 1.21               | 0.88                  | 0.89                | 1.26                 | -0.10               | -0.25             | 0.07               | Ppi3           | NM_027351.1 | Mus musculus peptidylprolyl isomerase (cyclophilin)-like 3 (Ppi3) mRNA.                                          |
| sd16803.9-203-S     | 0.97                | 1.10              | 1.53               | 0.79                  | 0.80                | 1.54                 | -0.30               | -0.45             | 0.01               | Slc40a1        | NM_016917.1 | Mus musculus solute carrier family 40 (iron-regulated transporter) member 1 (Slc40a1) mRNA.                      |
| sd16823.5.1-161-S   | 0.93                | 1.08              | 1.16               | 0.88                  | 0.90                | 1.16                 | -0.06               | -0.25             | 0.00               | 4931419K03Rik  | NM_072499.1 | Mus musculus RIKEN cDNA 4931419K03 gene (4931419K03Rik) mRNA.                                                    |
| sd16852.3.1-12-S    | 0.85                | 1.03              | 1.22               | 0.77                  | 0.98                | 1.51                 | -0.15               | -0.09             | 0.31               | 1530032H18Rik  | XM_129822.3 | Mus musculus RIKEN cDNA 1530032H18 gene (1530032H18Rik) mRNA.                                                    |
| sd16894.14-69-7-S   | 0.72                | 0.95              | 1.20               | 0.61                  | 1.00                | 1.41                 | -0.21               | 0.08              | 0.24               | Prim2          | NM_008922.1 | Mus musculus DNA primase p58 subunit (Prim2) mRNA.                                                               |
| sd17017.6-157-S     | 1.21                | 1.05              | 1.08               | 1.08                  | 0.79                | 0.94                 | -0.16               | -0.40             | -0.19              | Sox17          | NM_011441.2 | Mus musculus SRY-box containing gene 17 (Sox17) mRNA.                                                            |
| sd17044.2.1-77-S    | 1.01                | 1.13              | 1.15               | 0.86                  | 0.90                | 1.00                 | -0.23               | -0.32             | -0.19              | Slc30a1        | NM_009579.2 | Mus musculus solute carrier family 30 (zinc transporter) member 1 (Slc30a1) mRNA.                                |
| sd17134.7-259-S     | 0.82                | 1.06              | 1.25               | 0.67                  | 0.89                | 1.33                 | -0.29               | -0.25             | 0.01               | BC031781       | NM_145943.1 | Mus musculus cDNA sequence BC031781 (BC031781) mRNA.                                                             |
| sd17135.9-190-S     | 1.01                | 1.03              | 1.23               | 0.85                  | 0.76                | 1.17                 | -0.25               | -0.44             | -0.06              | Acbd3          | NM_133225.1 | Mus musculus acyl-Coenzyme A binding domain containing 3 (Acbd3) mRNA.                                           |
| sd17197.4-15-S      | 1.04                | 1.02              | 1.22               | 0.90                  | 0.68                | 1.16                 | -0.21               | -0.55             | -0.06              | Tagln2         | NM_178598.1 | Mus musculus tagalin 2 (Tagln2) mRNA.                                                                            |
| sd17258.4-12-S      | 0.93                | 1.05              | 1.33               | 0.73                  | 0.97                | 1.36                 | -0.35               | -0.10             | 0.03               | D1Ertd251e     | XM_139735.2 | Mus musculus DNA segment D1Ertd251e (D1Ertd251e) mRNA.                                                           |
| sd17280.15.5-29-S   | 0.91                | 1.09              | 1.29               | 0.76                  | 0.95                | 1.28                 | -0.18               | -0.11             | 0.23               | Arp2           | NM_139314.1 | Mus musculus non-metabolic cells 7 protein expressed in 11Nm7j mRNA.                                             |
| sd17289.2-452-S     | 0.82                | 1.08              | 1.04               | 0.90                  | 0.86                | 1.15                 | -0.13               | -0.33             | 0.14               | 2810422C020Rik | NM_027279.2 | Mus musculus RIKEN cDNA 2810422C020 gene (2810422C020Rik) mRNA.                                                  |
| sd17290.14-518-S    | 0.98                | 1.03              | 1.19               | 0.84                  | 0.80                | 1.07                 | -0.21               | -0.35             | -0.16              | 1200016D23Rik  | NM_028776.3 | Mus musculus RIKEN cDNA 1200016D23 gene (1200016D23Rik) mRNA.                                                    |
| sd17336.3.1-84-S    | 1.08                | 1.03              | 1.26               | 0.91                  | 0.82                | 1.20                 | -0.23               | -0.34             | -0.07              | 2810025M15Rik  | NM_027274.2 | Mus musculus RIKEN cDNA 2810025M15 gene (2810025M15Rik) mRNA.                                                    |
| sd17396.12-278-S    | 0.97                | 1.05              | 1.31               | 0.84                  | 0.95                | 1.21                 | -0.21               | -0.15             | -0.12              | 9830132G07Rik  | NM_172643.1 | Mus musculus RIKEN cDNA 9830132G07 gene (9830132G07Rik) mRNA.                                                    |
| sd17432.6-297-S     | 0.99                | 1.00              | 1.14               | 0.87                  | 0.73                | 1.08                 | -0.21               | -0.46             | -0.08              | Casp1          | NM_007791.2 | Mus musculus cysteine and glycine-rich protein 1 (Casp1) mRNA.                                                   |
| sd17443.5-550-S     | 0.93                | 1.09              | 1.40               | 0.86                  | 0.83                | 1.32                 | -0.25               | -0.38             | -0.01              | Ar1rb          | NM_028623.1 | Mus musculus aryl hydrocarbon receptor 1 (Ar1rb) mRNA.                                                           |
| sd17557.9.1-80-S    | 0.97                | 1.04              | 1.20               | 0.86                  | 0.95                | 1.16                 | -0.16               | -0.30             | 0.11               | 110009E18Rik   | NM_028498.1 | Mus musculus RIKEN cDNA 110009E18 gene (110009E18Rik) mRNA.                                                      |
| sd17654.5.1-10-S    | 0.96                | 1.16              | 1.11               | 0.92                  | 0.90                | 1.04                 | -0.07               | -0.36             | -0.10              | Ramp1          | NM_016894.1 | Mus musculus receptor (calcitonin) activity modifying protein 1 (Ramp1) mRNA.                                    |
| sd17665.8-37-S      | 0.95                | 1.12              | 1.29               | 0.90                  | 0.85                | 1.41                 | -0.07               | -0.38             | 0.13               | Cops8          | NM_133805.2 | Mus musculus COP9 (constitutive photomorphogenic) homolog subunit 8 (Arabidopsis thaliana) (Cops8) mRNA.         |
| sd17740.13-298-S    | 0.90                | 1.15              | 1.24               | 0.78                  | 0.90                | 1.18                 | -0.20               | -0.35             | -0.06              | Hrb            | NM_010472.1 | Mus musculus HIV-1 Rev binding protein (Hrb) mRNA.                                                               |
| sd17782.7.1-158-S   | 0.74                | 1.08              | 1.16               | 0.70                  | 0.92                | 1.32                 | -0.08               | -0.23             | 0.19               | 1110060C018Rik | NM_026846.1 | Mus musculus RIKEN cDNA 1110060C018 gene (1110060C018Rik) mRNA.                                                  |
| sd17783.10-25-S     | 0.75                | 1.15              | 1.18               | 0.70                  | 0.91                | 1.18                 | -0.10               | -0.35             | 0.00               | BC038286       | NM_170755.1 | Mus musculus cDNA sequence BC038286 (BC038286) mRNA.                                                             |
| sd17803.10-30-S     | 1.04                | 0.97              | 1.19               | 0.88                  | 0.93                | 1.11                 | -0.25               | -0.22             | -0.10              | Arp2           | NM_139735.2 | Mus musculus actin related protein 2/3 complex subunit 2 (Arp2) mRNA.                                            |
| sd17805.15.5-70-S   | 0.99                | 1.00              | 1.13               | 0.90                  | 0.96                | 1.46                 | -0.18               | -0.18             | 0.02               | Aic1           | NM_029474.4 | Mus musculus 5-aminolevulinic acid carboxamide ribonucleotide formyltransferase/IMP cyclohydrolase (Aic1) mRNA.  |
| sd17905.13.1-9-S    | 1.00                | 0.95              | 1.15               | 0.89                  | 0.88                | 1.32                 | -0.19               | -0.12             | 0.20               | Cyp20a1        | NM_129474.4 | Mus musculus cytochrome P450 family 20 subfamily A polypeptide 1 (Cyp20a1) mRNA.                                 |
| sd17933.6-96-12-S   | 0.95                | 1.00              | 1.10               | 0.90                  | 0.86                | 1.30                 | -0.08               | -0.23             | 0.24               | Nif3l1         | NM_022988.2 | Mus musculus Ngg1 interacting factor 3-like 1 (S. pombe) (Nif3l1) mRNA.                                          |
| sd18004.30-24-S     | 1.00                | 1.11              | 1.25               | 0.80                  | 0.92                | 1.05                 | -0.33               | -0.27             | -0.24              | Tpp2           | NM_009418.1 | Mus musculus tripeptidyl peptidase II (Tpp2) mRNA.                                                               |
| sd18015.10.1-64-S   | 0.98                | 1.08              | 1.13               | 0.84                  | 0.86                | 1.14                 | -0.22               | -0.34             | 0.02               | Mprp9          | NM_023514.2 | Mus musculus mitochondrial ribosomal protein S9 (Mprp9) mRNA.                                                    |
| sd18044.4-44-S      | 0.92                | 1.05              | 1.09               | 0.77                  | 0.99                | 1.51                 | -0.26               | -0.10             | 0.47               | Rpl31          | NM_053257.1 | Mus musculus ribosomal protein L31 (Rpl31) mRNA.                                                                 |
| sd18232.37-30-S     | 0.91                | 1.02              | 1.28               | 0.83                  | 0.91                | 1.44                 | -0.21               | -0.16             | 0.17               | Psm1a7         | NM_011969.1 | Mus musculus proteasome (prosome macropain) subunit alpha type 7 (Psm1a7) mRNA.                                  |
| sd18325.6.5-5-S     | 0.87                | 1.01              | 1.13               | 0.83                  | 0.91                | 1.08                 | -0.17               | -0.15             | 0.01               | Ppi1           | NM_011157.1 | Mus musculus protein tyrosine phosphatase 1 (Ppi1) mRNA.                                                         |
| sd18360.6.1-88-S    | 1.01                | 0.99              | 1.20               | 0.83                  | 0.77                | 1.10                 | -0.30               | -0.37             | -0.11              | Slp1           | NM_011414.1 | Mus musculus secretory leukocyte protease inhibitor (Slp1) mRNA.                                                 |
| sd18441.3.11-50-S   | 0.88                | 1.13              | 1.21               | 0.91                  | 0.83                | 1.22                 | 0.03                | -0.44             | 0.02               | Scand1         | NM_020255.1 | Mus musculus SCAN domain-containing 1 (Scand1) mRNA.                                                             |
| sd18457.19-17-30-S  | 0.97                | 1.01              | 1.11               | 0.85                  | 0.91                | 1.21                 | -0.18               | -0.14             | 0.13               | Tpck4ap        | NM_019828.1 | Mus musculus transient receptor potential cation channel subfamily C member 4 associated protein (Tpck4ap) mRNA. |
| sd18473.7-30-S      | 0.69                | 1.16              | 1.15               | 0.64                  | 0.96                | 1.33                 | -0.12               | -0.27             | 0.22               | E2f1           | NM_007891.1 | Mus musculus E2F transcription factor 1 (E2f1) mRNA.                                                             |
| sd18515.2-486-1-S   | 0.63                | 1.02              | 1.05               | 0.61                  | 1.06                | 1.40                 | -0.06               | -0.06             | 0.41               | 4930519N13Rik  | NM_027204.1 | Mus musculus RIKEN cDNA 4930519N13 gene (4930519N13Rik) mRNA.                                                    |
| sd18579.23-24-S     | 1.22                | 0.93              | 1.16               | 0.95                  | 0.69                | 1.02                 | -0.35               | -0.42             | -0.18              | Rrbp1          | NM_130532.1 | Mus musculus ribosome binding protein 1 (Rrbp1) mRNA.                                                            |
| sd18618.9-0-S       | 0.97                | 1.03              | 1.23               | 0.85                  | 0.97                | 1.45                 | -0.31               | -0.31             | 0.33               | 330001M20Rik   | NM_028131.3 | Mus musculus RIKEN cDNA 330001M20 gene (330001M20Rik) mRNA.                                                      |
| sd18714.45-17-S     | 0.97                | 0.99              | 1.35               | 0.77                  | 0.85                | 1.16                 | -0.35               | -0.21             | -0.23              | Tpmp7          | NM_021450.1 | Mus musculus transient receptor potential cation channel subfamily M member 7 (Tpmp7) mRNA.                      |
| sd18802.5.1-208-S   | 0.84                | 1.01              | 1.13               | 0.78                  | 0.97                | 1.26                 | -0.12               | -0.05             | 0.17               | Ndufa1         | NM_027175.2 | Mus musculus NADH dehydrogenase (ubiquinone) 1 alpha subcomplex assembly factor 1 (Ndufa1) mRNA.                 |
| sd18812.14-127-2-S  | 0.73                | 0.91              | 1.05               | 0.70                  | 1.07                | 1.22                 | -0.05               | 0.24              | 0.21               | 1200015F23Rik  | NM_203936.3 | Mus musculus RIKEN cDNA 1200015F23 gene (1200015F23Rik) mRNA.                                                    |
| sd18975.13.1-98-S   | 1.05                | 1.05              | 1.05               | 1.00                  | 0.75                | 0.97                 | -0.07               | -0.49             | -0.12              | 2610203E10Rik  | NM_183220   | Mus musculus RIKEN cDNA 2610203E10 gene (2610203E10Rik) mRNA.                                                    |
| sd19176.21-114-S    | 1.32                | 0.92              | 1.10               | 1.07                  | 0.67                | 0.97                 | -0.32               | -0.45             | -0.18              | Skp39          | NM_016866.2 | Mus musculus serine/threonine kinase 39 STE20/SPS1 homolog (yeast) (Skp39) mRNA.                                 |
| sd19314.17-32-S     | 0.84                | 0.98              | 1.30               | 0.79                  | 0.99                | 1.51                 | -0.08               | -0.01             | 0.22               | E330008C022Rik | NM_172662.1 | Mus musculus RIKEN cDNA E330008C022 gene (E330008C022Rik) mRNA.                                                  |
| sd19318.2.11-20-S   | 0.89                | 1.04              | 1.17               | 0.84                  | 0.91                | 1.71                 | -0.42               | -0.41             | 0.01               | Psm1b7         | NM_011157.1 | Mus musculus proteasome (prosome macropain) subunit beta type 7 (Psm1b7) mRNA.                                   |
| sd19388.5-90-S      | 0.96                | 1.10              | 1.31               | 0.85                  | 0.90                | 1.26                 | -0.17               | -0.29             | 0.06               | Rbm18          | NM_026434.2 | Mus musculus RNA binding motif protein 18 (Rbm18) mRNA.                                                          |
| sd19390.3.3-3-S     | 1.00                | 0.98              | 1.17               | 0.77                  | 0.79                | 1.48                 | -0.39               | -0.32             | 0.34               | Ndufa8         | NM_026703.1 | Mus musculus NADH dehydrogenase (ubiquinone) 1 alpha subcomplex 8 (Ndufa8) mRNA.                                 |
| sd19447.7.1-15-S    | 0.97                | 1.01              | 1.29               | 0.78                  | 0.85                | 1.18                 | -0.32               | -0.24             | -0.13              | 2900010J23Rik  | NM_175190.2 | Mus musculus RIKEN cDNA 2900010J23 gene (2900010J23Rik) mRNA.                                                    |
| sd19470.2-417-S     | 1.00                | 1.00              | 1.12               | 0.92                  | 0.84                | 1.04                 | -0.12               | -0.25             | -0.11              | Irf5           | NM_030244   | Mus musculus interferon inducible protein 5 (Irf5) mRNA.                                                         |
| sd19472.10-43-S     | 0.97                | 1.07              | 1.13               | 0.88                  | 0.95                | 1.10                 | -0.15               | -0.17             | -0.05              | Sh3glb2        | NM_139302.1 | Mus musculus SH3-domain GRB2-like endophilin B2 (Sh3glb2) mRNA.                                                  |
| sd19473.1-35-S      | 1.07                | 0.90              | 1.12               | 0.83                  | 0.78                | 1.10                 | -0.36               | -0.20             | -0.03              | Tmem15         | NM_177648.2 | Mus musculus transmembrane protein 15 (Tmem15) mRNA.                                                             |
| sd19515.3-120-S     | 0.92                | 1.09              | 1.30               | 0.78                  | 0.95                | 1.40                 | -0.24               | -0.19             | 0.11               | Surf5          | NM_011513   | Mus musculus surfactant gene 5 (Surf5) mRNA.                                                                     |
| sd19523.39-64-S     | 1.07                | 1.02              | 1.36               | 0.83                  | 0.83                | 1.14                 | -0.37               | -0.27             | -0.25              | Notch1         | NM_008714.2 | Mus musculus Notch gene homolog 1 (Drosophila) (Notch1) mRNA.                                                    |
| sd19556.3.1-14-S    | 1.04                | 0.97              | 1.07               | 0.86                  | 0.75                | 1.08                 | -0.29               | -0.38             | 0.00               | Phr1           | XM_203853.2 | Mus musculus protein tyrosine phosphatase-like (proline instead of catalytic arginine) member a (Ptp1a) mRNA.    |
| sd19661.4.1-12-S    | 0.97                | 1.06              | 1.17               | 0.83                  | 0.98                | 1.54                 | -0.23               | -0.15             | 0.40               | Ptp1a          | NM_013935.1 | Mus musculus protein tyrosine phosphatase-like (proline instead of catalytic arginine) member a (Ptp1a) mRNA.    |
| sd19667.9.1-67-S    | 1.09                | 0.99              | 1.12               | 0.92                  | 0.74                | 1.03                 | -0.25               | -0.42             | -0.11              | Rsu1           | NM_009105   | Mus musculus Ras suppressor protein 1 (Rsu1) mRNA.                                                               |
| sd19726.14.1-76-S   | 0.90                | 1.04              | 1.21               | 0.73                  | 0.92                | 1.33                 | -0.30               | -0.18             | 0.14               | G431001I09Rik  | NM_133837.2 | Mus musculus RIKEN cDNA G431001I09 gene (G431001I09Rik) mRNA.                                                    |
| sd19777.13-152-S    | 0.97                | 1.08              | 1.13               | 0.91                  | 0.77                | 1.03                 | -0.09               | -0.49             | -0.30              | Arfap1         | NM_145760.2 | Mus musculus ADP-ribosylation factor GTPase activating protein 1 (Arfap1) mRNA.                                  |
| sd19841.6.1-16-S    | 0.95                | 1.06              | 1.05               | 0.90                  | 0.86                | 1.22                 | -0.09               | -0.40             | 0.22               | F730031C020Rik | NM_283813.1 | Mus musculus RIKEN cDNA F730031C020 gene (F730031C020Rik) mRNA.                                                  |
| sd19922.2-573-S     | 0.99                | 1.15              | 1.12               | 0.87                  | 0.95                | 1.18                 | -0.27               | -0.17             | 0.18               | Znrf3          | NM_026713.2 | M                                                                                                                |

| Gene Name           | Control 18 Hours | Control 1 Week | Control 4 Weeks | Treatment 18 Hours | Treatment 1 Week | Treatment 4 Weeks | Log2 FC 18 Hours | Log2 FC 1 Week | Log2 FC 4 Weeks | Symbol         | Accession   | Definition                                                                                                                       |
|---------------------|------------------|----------------|-----------------|--------------------|------------------|-------------------|------------------|----------------|-----------------|----------------|-------------|----------------------------------------------------------------------------------------------------------------------------------|
| sd20812.9.574.16-S  | 1.07             | 0.98           | 1.05            | 0.91               | 0.84             | 1.22              | -0.23            | -0.22          | 0.23            | Gorasp2        | NM_027352.2 | Mus musculus golgi reassembly stacking protein 2 (Gorasp2) mRNA.                                                                 |
| sd20834.16.1.186-S  | 1.08             | 1.06           | 1.16            | 0.94               | 0.82             | 1.02              | -0.21            | -0.37          | -0.19           | LOC329416      | NM_181547   | Mus musculus nitric oxide synthase trafficker (LOC329416) mRNA.                                                                  |
| sd20945.14.483-S    | 0.84             | 1.21           | 1.45            | 0.77               | 0.88             | 1.36              | -0.13            | -0.46          | -0.08           | Epc2           | NM_172663.2 | Mus musculus Epc2                                                                                                                |
| sd21049.17.300-S    | 1.01             | 0.94           | 1.14            | 0.93               | 0.57             | 1.08              | -0.11            | -0.47          | -0.07           | g130404D14Rik  | NM_146119.1 | Mus musculus RIKEN cDNA g130404D14 gene (g130404D14Rik) mRNA.                                                                    |
| sd21063.34.424-S    | 1.01             | 1.03           | 1.24            | 0.95               | 0.89             | 1.34              | -0.08            | -0.31          | 0.21            | Gnasp2         | NM_133682.2 | Mus musculus gnaf nucleoside diphosphate kinase 2 (Gnasp2) mRNA.                                                                 |
| sd21064.31.2-S      | 0.95             | 1.07           | 1.24            | 0.78               | 0.79             | 1.09              | -0.28            | -0.43          | -0.18           | 5830434P21Rik  | NM_172861.2 | Mus musculus RIKEN cDNA 5830434P21 gene (5830434P21Rik) mRNA.                                                                    |
| sd21088.14.336-S    | 0.75             | 1.12           | 1.26            | 0.68               | 0.94             | 1.26              | -0.15            | -0.26          | 0.01            | Ppp2r4         | NM_138748.2 | Mus musculus protein phosphatase 2A regulatory subunit B (PP2A) (Ppp2r4) mRNA.                                                   |
| sd21090.15.384-S    | 0.85             | 1.20           | 1.16            | 0.78               | 0.91             | 1.17              | -0.14            | -0.41          | 0.01            | 5730472N09Rik  | NM_175392.3 | Mus musculus RIKEN cDNA 5730472N09 gene (5730472N09Rik) mRNA.                                                                    |
| sd21095.3.1.3-S     | 1.08             | 0.96           | 1.11            | 0.93               | 0.79             | 1.04              | -0.20            | -0.28          | -0.09           | Endog          | NM_007931.1 | Mus musculus endonuclease G (Endog) mRNA.                                                                                        |
| sd21098.22.1.27-S   | 1.10             | 1.04           | 1.01            | 1.01               | 0.84             | 1.00              | -0.12            | -0.30          | -0.01           | Pkn3           | NM_153805.1 | Mus musculus protein kinase N3 (Pkn3) mRNA.                                                                                      |
| sd21181.13.417-S    | 0.90             | 1.07           | 1.15            | 0.82               | 0.90             | 1.17              | -0.12            | -0.25          | 0.04            | E430019H13Rik  | XM_130073.3 | Mus musculus anaphase promoting complex subunit 2 (Anapc2) mRNA.                                                                 |
| sd21186.13.1.10-S   | 0.88             | 1.14           | 1.17            | 0.85               | 0.81             | 1.16              | -0.08            | -0.31          | 0.02            | Anapc2         | NM_173592.2 | Mus musculus anaphase promoting complex subunit 2 (Anapc2) mRNA.                                                                 |
| sd21230.101.37-S    | 0.88             | 0.98           | 1.21            | 0.71               | 1.00             | 1.61              | -0.31            | 0.03           | -0.41           | Nudb5          | NM_016918.2 | Mus musculus nudix (nucleoside diphosphate linked moiety X)-type motif 5 (Nudb5) mRNA.                                           |
| sd21344.10.377-S    | 1.02             | 0.99           | 1.05            | 0.98               | 0.76             | 1.03              | -0.05            | -0.38          | -0.03           | 9630050M13Rik  | NM_194000.3 | Mus musculus RIKEN cDNA 9630050M13 gene (9630050M13Rik) mRNA.                                                                    |
| sd21351.16.335-S    | 0.90             | 1.09           | 1.26            | 0.74               | 0.89             | 1.20              | -0.29            | -0.30          | -0.06           | 2610019N13Rik  | NM_026989.1 | Mus musculus RIKEN cDNA 2610019N13 gene (2610019N13Rik) mRNA.                                                                    |
| sd21371.8.1.6-S     | 0.81             | 1.02           | 1.27            | 0.72               | 0.97             | 1.45              | -0.17            | -0.08          | 0.19            | Rabggib        | NM_011231.1 | Mus musculus RAB geranylgeranyl transferase b subunit (Rabggib) mRNA.                                                            |
| sd21406.13.103-S    | 0.94             | 0.98           | 1.20            | 0.77               | 0.65             | 1.13              | -0.28            | -0.51          | -0.08           | Prikacb        | NM_011100.3 | Mus musculus protein kinase cAMP dependent catalytic beta (Prikacb) mRNA.                                                        |
| sd21429.6.290-S     | 0.91             | 1.03           | 1.08            | 0.78               | 0.78             | 1.06              | -0.22            | -0.46          | -0.02           | Lmo4           | NM_010723.2 | Mus musculus LIM domain only 4 (Lmo4) mRNA.                                                                                      |
| sd21464.11.404-S    | 0.95             | 1.13           | 1.23            | 0.81               | 0.95             | 1.53              | -0.22            | -0.24          | 0.26            | Metap1         | NM_173524.2 | Mus musculus methylthioadenosine phosphorylase 1 (Metap1) mRNA.                                                                  |
| sd21513.14.14-S     | 1.02             | 0.99           | 1.31            | 0.91               | 0.92             | 1.59              | -0.17            | -0.10          | 0.28            | 2310008M10Rik  | NM_025509.2 | Mus musculus RIKEN cDNA 2310008M10 gene (2310008M10Rik) mRNA.                                                                    |
| sd21518.7.1.44-S    | 0.93             | 1.01           | 1.23            | 0.81               | 0.92             | 1.50              | -0.19            | -0.12          | 0.31            | Nola1          | NM_026578.1 | Mus musculus nucleolar protein family A member 1 (HACA small nucleolar RNPs) (Nola1) mRNA.                                       |
| sd21552.7.36-S      | 0.66             | 0.99           | 1.15            | 0.60               | 1.09             | 1.61              | -0.14            | 0.14           | 0.49            | Ugt8           | NM_011674.2 | Mus musculus UDP-glucuronosyltransferase 8 (Ugt8) mRNA.                                                                          |
| sd21598.9.1.53-S    | 1.10             | 0.94           | 1.16            | 0.92               | 0.84             | 1.03              | -0.27            | -0.16          | -0.16           | Snr7           | XM_131162.3 | Mus musculus sorting nexin 7 (Snr7) mRNA.                                                                                        |
| sd21613.3.441-S     | 1.08             | 1.02           | 1.21            | 0.88               | 0.93             | 1.29              | -0.27            | -0.13          | 0.11            | Gpr88          | NM_022427.1 | Mus musculus G-protein coupled receptor 88 (Gpr88) mRNA.                                                                         |
| sd21638.11.586-S    | 1.14             | 1.01           | 1.11            | 0.90               | 0.86             | 1.00              | -0.34            | -0.23          | -0.15           | B430201A12Rik  | XM_283903.2 | Mus musculus RIKEN cDNA 1110021E09 gene (1110021E09Rik) mRNA.                                                                    |
| sd21641.7.464-S     | 0.96             | 1.14           | 1.37            | 0.79               | 0.86             | 1.35              | -0.24            | -0.24          | -0.02           | 1110021E09Rik  | NM_028122.2 | Mus musculus RIKEN cDNA 1110021E09 gene (1110021E09Rik) mRNA.                                                                    |
| sd21732.24.3.3-S    | 0.99             | 1.00           | 1.25            | 0.83               | 0.83             | 1.29              | -0.27            | -0.01          | 0.23            | Alp1a1         | NM_144950.1 | Mus musculus ATPase Na+/K+ transporting alpha 1 polypeptide (Alp1a1) mRNA.                                                       |
| sd21831.10.1.25-S   | 1.11             | 1.07           | 1.06            | 0.97               | 0.76             | 0.96              | -0.20            | -0.47          | -0.14           | Ecm1           | NM_007899   | Mus musculus extracellular matrix protein 1 (Ecm1) mRNA.                                                                         |
| sd21857.5.1.13-S    | 0.92             | 1.06           | 1.24            | 0.80               | 0.88             | 1.52              | -0.21            | -0.28          | 0.30            | Pamb4          | NM_008945.1 | Mus musculus proteasome (prosome macropain) subunit beta type 4 (Pamb4) mRNA.                                                    |
| sd21970.4.1.6-S     | 0.96             | 1.05           | 1.19            | 0.86               | 0.75             | 1.13              | -0.17            | -0.48          | -0.06           | Mapbbp         | NM_031248.3 | Mus musculus mitogen activated protein binding protein interacting protein (Mapbbp) mRNA.                                        |
| sd21973.8.21-S      | 0.66             | 1.08           | 1.27            | 0.60               | 0.97             | 1.49              | -0.15            | -0.16          | 0.23            | Lmna           | NM_019390.1 | Mus musculus lamin A (Lmna) mRNA.                                                                                                |
| sd21990.8.1.193-S   | 0.83             | 1.08           | 1.21            | 0.71               | 0.93             | 1.33              | -0.22            | -0.02          | 0.15            | Proc           | NM_033573.1 | Mus musculus papillary renal cell carcinoma (translocation-associated) (Proc) mRNA.                                              |
| sd22124.2.66-S      | 0.91             | 1.19           | 1.33            | 0.86               | 0.84             | 1.25              | -0.09            | -0.47          | -0.07           | Gpr171         | NM_133598.1 | Mus musculus G-protein coupled receptor 171 (Gpr171) mRNA.                                                                       |
| sd22236.9.1.81-S    | 0.98             | 1.07           | 1.21            | 0.87               | 0.91             | 1.08              | -0.20            | -0.40          | 0.15            | Nudb5          | NM_016918.2 | Mus musculus nudix (nucleoside diphosphate linked moiety X)-type motif 5 (Nudb5) mRNA.                                           |
| sd22235.20.1.75-S   | 0.95             | 1.10           | 1.15            | 0.78               | 0.98             | 1.09              | -0.29            | -0.16          | -0.08           | Bbs7           | NM_027810.1 | Mus musculus Bardet-Bied syndrome 7 (Bbs7) mRNA.                                                                                 |
| sd22303.28.240-S    | 1.18             | 1.02           | 1.19            | 0.96               | 0.72             | 1.05              | -0.28            | -0.50          | -0.18           | 1600019004Rik  | NM_173182.1 | Mus musculus RIKEN cDNA 1600019004 gene (1600019004Rik) mRNA.                                                                    |
| sd22402.6.1.12-S    | 0.94             | 1.08           | 1.23            | 0.80               | 0.95             | 1.39              | -0.22            | -0.18          | 0.18            | Mips28         | NM_025434.2 | Mus musculus mitochondrial ribosomal protein S28 (Mips28) mRNA.                                                                  |
| sd22415.7.11-S      | 0.89             | 1.06           | 1.30            | 0.74               | 0.83             | 1.30              | -0.27            | -0.36          | -0.01           | Pmp3           | NM_008994.2 | Mus musculus peroxisomal membrane protein 3 (Pmp3) mRNA.                                                                         |
| sd22518.14.1.14-S   | 1.03             | 0.94           | 1.42            | 0.88               | 0.73             | 1.32              | -0.23            | -0.36          | -0.10           | Gtp4           | NM_018734.2 | Mus musculus glutathione S-transferase mu 5 (Gstm5) mRNA.                                                                        |
| sd22733.6.2.0-S     | 0.55             | 1.07           | 1.17            | 0.47               | 0.89             | 1.36              | -0.20            | -0.47          | -0.23           | Gstm5          | NM_038601.1 | Mus musculus glutathione S-transferase mu 5 (Gstm5) mRNA.                                                                        |
| sd22767.14.1.45-S   | 0.96             | 1.17           | 1.13            | 0.84               | 0.88             | 1.17              | -0.10            | -0.40          | 0.05            | Utr1           | NM_153091.2 | Mus musculus ubiquitin expression of tumor necrosis factor 1 (Utr1) mRNA.                                                        |
| sd22797.19.196-S    | 0.97             | 1.01           | 1.20            | 0.79               | 0.79             | 1.09              | -0.29            | -0.35          | -0.13           | D3Jtr1         | NM_144901.2 | Mus musculus DNA segment Chr 3 MJEffers 1 (D3Jtr1) mRNA.                                                                         |
| sd22833.10.29-S     | 1.11             | 1.26           | 0.90            | 1.05               | 0.66             | 1.16              | -0.07            | -0.87          | 0.35            | Hmgcs2         | NM_008256.2 | Mus musculus 3-hydroxy-3-methylglutaryl-Coenzyme A synthase 2 (Hmgcs2) mRNA.                                                     |
| sd22884.7.1.23-S    | 1.03             | 0.97           | 1.11            | 0.82               | 0.94             | 1.50              | -0.33            | -0.04          | 0.44            | Lass2          | NM_029789.1 | Mus musculus longevity assurance homolog 2 (S. cerevisiae) (Lass2) mRNA.                                                         |
| sd22940.2.1.25-S    | 1.13             | 1.21           | 0.67            | 0.96               | 0.95             | 0.96              | -0.22            | -0.35          | 0.52            | S100a8         | NM_013650.1 | Mus musculus S100 calcium binding protein A8 (calgranulin A) (S100a8) mRNA.                                                      |
| sd22956.4.1.1-S     | 0.97             | 1.08           | 1.23            | 0.84               | 0.75             | 1.24              | -0.21            | -0.52          | 0.01            | Jtb            | NM_006924.1 | Mus musculus jumping translocation breakpoint (Jtb) mRNA.                                                                        |
| sd22977.3.91.193-S  | 0.93             | 0.98           | 1.25            | 0.80               | 0.81             | 1.13              | -0.22            | -0.27          | -0.14           | Dpm3           | XM_130951.1 | Mus musculus diacylglycerol phosphatase (Dpm3) mRNA.                                                                             |
| sd22984.4.49-S      | 1.07             | 0.99           | 1.10            | 0.79               | 0.82             | 1.18              | -0.25            | -0.30          | 0.11            | Ser2           | NM_025434.2 | Mus musculus serine protease 2 (Ser2) mRNA.                                                                                      |
| sd23003.7.28.144-S  | 0.97             | 1.12           | 1.21            | 0.83               | 0.82             | 1.17              | -0.12            | -0.45          | -0.05           | 0610031J06Rik  | NM_020003.1 | Mus musculus RIKEN cDNA 0610031J06 gene (0610031J06Rik) mRNA.                                                                    |
| sd23015.45.22-S     | 0.89             | 1.04           | 1.21            | 0.83               | 0.89             | 1.48              | -0.11            | -0.24          | 0.30            | Mrip24         | NM_026591.1 | Mus musculus mitochondrial ribosomal protein L24 (Mrip24) mRNA.                                                                  |
| sd23109.16.229-S    | 1.04             | 1.01           | 1.15            | 0.81               | 0.73             | 1.10              | -0.36            | -0.45          | -0.06           | 1200003C06Rik  | NM_025813.1 | Mus musculus RIKEN cDNA 1200003C06 gene (1200003C06Rik) mRNA.                                                                    |
| sd23111.16.8.12-S   | 0.89             | 1.02           | 1.21            | 0.89               | 0.98             | 1.38              | -0.01            | -0.05          | 0.19            | Glm            | NM_138591.1 | Mus musculus G elongation factor (Glm) mRNA.                                                                                     |
| sd23164.14.1.82-S   | 0.93             | 1.01           | 1.21            | 0.77               | 0.81             | 1.30              | -0.26            | -0.33          | 0.12            | D3Ert194e      | XM_130881.3 | Mus musculus DNA segment Chr 3 ERATO Doi 194 expressed (D3Ert194e) mRNA.                                                         |
| sd23193.10.1.8-S    | 1.01             | 0.96           | 1.14            | 0.90               | 0.73             | 1.13              | -0.18            | -0.41          | 0.00            | Alp5           | NM_025442.1 | Mus musculus asparagine-linked glycosylation 5 homolog (yeast diacylglycerol-phosphate beta-glucosyltransferase) (Alp5) mRNA.    |
| sd23201.10.1.14-S   | 0.94             | 1.02           | 0.98            | 0.83               | 0.83             | 1.14              | -0.13            | -0.14          | 0.13            | 2810046L04Rik  | NM_020466.1 | Mus musculus RIKEN cDNA 2810046L04 gene (2810046L04Rik) mRNA.                                                                    |
| sd23261.27.162-S    | 1.17             | 1.06           | 1.07            | 1.04               | 0.84             | 0.98              | -0.19            | -0.32          | -0.13           | Kcnab2         | NM_010598.2 | Mus musculus potassium voltage-gated channel shaker-related subfamily beta member 2 (Kcnab2) mRNA.                               |
| sd23476.5.13-S      | 0.95             | 1.05           | 1.28            | 0.90               | 0.96             | 1.45              | -0.08            | -0.12          | 0.18            | Vamp3          | NM_009498.3 | Mus musculus vesicle-associated membrane protein 3 (Vamp3) mRNA.                                                                 |
| sd23487.8.3034.55-S | 1.18             | 0.95           | 1.04            | 1.00               | 0.65             | 0.96              | -0.23            | -0.53          | -0.10           | H6pd           | NM_173371.2 | Mus musculus hexose-6-phosphate dehydrogenase (glucose 1-dehydrogenase) (H6pd) mRNA.                                             |
| sd23489.7.25-S      | 1.03             | 0.98           | 1.07            | 0.90               | 0.77             | 1.01              | -0.20            | -0.34          | -0.09           | 4930422J18Rik  | NM_029035.2 | Mus musculus RIKEN cDNA 4930422J18 gene (4930422J18Rik) mRNA.                                                                    |
| sd23497.11.62-S     | 0.99             | 1.01           | 1.08            | 0.88               | 0.81             | 1.09              | -0.17            | -0.32          | 0.02            | Pex14          | NM_019781.1 | Mus musculus peroxisomal biogenesis factor 14 (Pex14) mRNA.                                                                      |
| sd23509.31.62-S     | 0.98             | 1.01           | 1.18            | 0.80               | 0.77             | 1.23              | -0.28            | -0.39          | 0.06            | Ube4b          | NM_020222.1 | Mus musculus ubiquitin domain factor E4B UFD homolog (S. cerevisiae) (Ube4b) mRNA.                                               |
| sd23523.7.1.20-S    | 0.98             | 1.04           | 1.21            | 0.81               | 0.81             | 1.15              | -0.11            | -0.38          | 0.01            | Fbw7b1         | NM_015732.1 | Mus musculus F-box protein 7b (Fbw7b1) mRNA.                                                                                     |
| sd23566.9.53-S      | 0.95             | 1.08           | 1.31            | 0.87               | 0.82             | 1.38              | -0.14            | -0.38          | 0.07            | Lypa2          | NM_011942.1 | Mus musculus lysophospholipase 2 (Lypa2) mRNA.                                                                                   |
| sd23678.5.1.21-S    | 0.90             | 1.11           | 1.53            | 0.81               | 0.93             | 1.85              | -0.15            | -0.26          | 0.27            | 3200001F09Rik  | NM_027935.1 | Mus musculus RIKEN cDNA 3200001F09 gene (3200001F09Rik) mRNA.                                                                    |
| sd23680.13.149-S    | 0.82             | 1.09           | 1.34            | 0.71               | 0.88             | 1.30              | -0.22            | -0.31          | -0.04           | 11110007C24Rik | NM_025382.3 | Mus musculus RIKEN cDNA 11110007C24 gene (11110007C24Rik) mRNA.                                                                  |
| sd23684.11.537-S    | 1.13             | 1.02           | 1.10            | 0.98               | 0.73             | 0.95              | -0.20            | -0.47          | -0.20           | Sept1          | NM_029100.1 | Mus musculus selenoprotein N 1 (Sept1) mRNA.                                                                                     |
| sd23717.7.545-S     | 0.90             | 1.14           | 1.24            | 0.84               | 0.82             | 1.22              | -0.09            | -0.49          | 0.00            | D4Ert196e      | NM_025667.1 | Mus musculus DNA segment Chr 4 ERATO Doi 196 expressed (D4Ert196e) mRNA.                                                         |
| sd23724.7.67-S      | 0.85             | 1.13           | 1.35            | 0.76               | 0.89             | 1.35              | -0.17            | -0.35          | 0.02            | Ppp1r8         | NM_146154.1 | Mus musculus RIKEN cDNA 1110007F05 gene (1110007F05Rik) mRNA.                                                                    |
| sd23736.8.1.149-S   | 1.10             | 0.99           | 1.28            | 0.90               | 0.80             | 1.08              | -0.29            | -0.30          | 0.22            | 1110007F05Rik  | NM_355611.1 | Mus musculus RIKEN cDNA 1110007F05 gene (1110007F05Rik) mRNA.                                                                    |
| sd23752.10.407-S    | 0.96             | 1.01           | 1.03            | 0.78               | 1.02             | 1.22              | -0.30            | 0.02           | 0.24            | 2810055E05Rik  | NM_153160.2 | Mus musculus RIKEN cDNA 2810055E05 gene (2810055E05Rik) mRNA.                                                                    |
| sd23771.9.1.58-S    | 0.89             | 1.05           | 1.17            | 0.82               | 0.91             | 1.35              | -0.13            | -0.21          | 0.22            | Eif3a2         | NM_018799.1 | Mus musculus eukaryotic translation initiation factor 3 subunit 2 (beta) (Eif3a2) mRNA.                                          |
| sd23840.4.11-S      | 1.00             | 1.01           | 1.16            | 0.86               | 0.87             | 1.36              | -0.23            | -0.21          | 0.23            | 2700082D03Rik  | NM_026031.1 | Mus musculus RIKEN cDNA 2700082D03 gene (2700082D03Rik) mRNA.                                                                    |
| sd23881.4.371-S     | 1.03             | 1.01           | 1.22            | 0.79               | 0.82             | 1.10              | -0.38            | -0.30          | -0.14           | 3110037116Rik  | NM_026451.1 | Mus musculus RIKEN cDNA 3110037116 gene (3110037116Rik) mRNA.                                                                    |
| sd23887.17.1.103-S  | 0.94             | 1.10           | 1.30            | 0.83               | 0.91             | 1.47              | -0.18            | -0.27          | 0.20            | Ctps           | NM_016748.1 | Mus musculus cytidine 5-triphosphate synthase (Ctps) mRNA.                                                                       |
| sd23928.4.1.17-S    | 0.96             | 1.07           | 1.38            | 0.75               | 0.84             | 1.30              | -0.34            | -0.35          | -0.08           | Dph22          | NM_026344.2 | Mus musculus diphtheria toxin resistance protein required for diphtheria toxin biosynthesis (Saccharomyces)-like 2 (Dph22) mRNA. |
| sd23930.5.1.96-S    | 0.91             | 1.16           | 1.18            | 0.75               | 0.80             | 1.08              | -0.28            | -0.45          | -0.43           | Alp5b0b        | NM_036717.1 | Mus musculus ATPase H+ transporting VO subunit B (Alp5b0b) mRNA.                                                                 |
| sd24032.7.1.116-S   | 0.94             | 1.05           | 1.12            | 0.84               | 0.95             | 1.25              | -0.14            | -0.17          | 0.12            | 2810062J02Rik  | NM_026371.1 | M                                                                                                                                |

| Gene Name           | Control<br>18 Hours | Control<br>1 Week | Control<br>4 Weeks | Treatment<br>18 Hours | Treatment<br>1 Week | Treatment<br>4 Weeks | Log2 FC<br>18 Hours | Log2 FC<br>1 Week | Log2 FC<br>4 Weeks | Symbol        | Accession   | Definition                                                                                                  |
|---------------------|---------------------|-------------------|--------------------|-----------------------|---------------------|----------------------|---------------------|-------------------|--------------------|---------------|-------------|-------------------------------------------------------------------------------------------------------------|
| scd24830.8.31-S     | 0.77                | 0.99              | 1.19               | 0.73                  | 1.05                | 1.46                 | -0.07               | 0.08              | 0.30               | Fusp1         | NM_010178.1 | Mus musculus FUS interacting protein (serine-arginine rich) 1 (Fusp1) mRNA.                                 |
| scd24858.5.1.216-S  | 1.00                | 1.04              | 1.19               | 0.88                  | 0.87                | 1.24                 | -0.19               | -0.25             | -0.05              | A1838661      | NM_133884.1 | Mus musculus expressed sequence A1838661 (A1838661) mRNA.                                                   |
| scd24880.7.98-S     | 0.78                | 1.01              | 1.17               | 0.70                  | 0.96                | 1.39                 | -0.18               | -0.08             | 0.25               | Srfr4         | NM_020587.1 | Mus musculus splicing factor arginine/serine-rich 4 (Srfp75) (Sfrs4) mRNA.                                  |
| scd24886.6.202-S    | 0.93                | 1.05              | 1.34               | 0.85                  | 1.06                | 1.61                 | -0.13               | 0.02              | -0.27              | 2600002E23Rik | NM_026441.2 | Mus musculus HIKEN cDNA 2600002E23 gene (2600002E23Rik) mRNA.                                               |
| scd24898.72.1.98-S  | 1.08                | 1.00              | 1.27               | 0.90                  | 0.77                | 1.36                 | -0.27               | -0.36             | 0.03               | Col16a1       | NM_028928.3 | Mus musculus proteoglycan type XII alpha 1 (Col16a1) mRNA.                                                  |
| scd24926.6.1.18-S   | 1.01                | 0.97              | 1.25               | 0.76                  | 0.98                | 1.53                 | -0.41               | 0.01              | 0.30               | Ala2          | NM_016892.2 | Mus musculus acylate kinase 2 (Ala2) mRNA.                                                                  |
| scd24979.20.1.9-S   | 0.98                | 1.04              | 1.26               | 0.87                  | 0.95                | 1.15                 | -0.17               | -0.14             | -0.12              | Gnli2         | NM_145552   |                                                                                                             |
| scd24987.27.1.4-S   | 0.85                | 1.08              | 1.41               | 0.69                  | 0.99                | 1.29                 | -0.30               | -0.12             | -0.13              | Inpp5b        | NM_008385.3 | Mus musculus inositol polyphosphate 5-phosphatase B (Inpp5b) mRNA.                                          |
| scd24988.17.1.42-S  | 0.93                | 1.05              | 1.29               | 0.79                  | 0.92                | 1.43                 | -0.24               | -0.19             | -0.16              | Sr3a3         | NM_029157.2 | Mus musculus splicing factor 3a subunit 3 (Sf3a3) mRNA.                                                     |
| scd25011.1.118.77-S | 0.64                | 1.10              | 1.10               | 0.58                  | 1.04                | 1.55                 | -0.14               | -0.08             | 0.51               | Cited4        | NM_019563   | Mus musculus Cbp/p300-interacting transactivator with Glu/Asp-rich carboxy-terminal domain 4 (Cited4) mRNA. |
| scd25041.6.1.49-S   | 0.90                | 0.96              | 1.17               | 0.84                  | 1.05                | 1.62                 | -0.09               | -0.14             | -0.14              | Elavl1        | NM_019422.1 | Mus musculus elongation of very long chain fatty acids (Fen1/Eco1 SUR4/Elav1) mRNA.                         |
| scd25073.4.1.109-S  | 0.82                | 1.05              | 1.27               | 0.68                  | 0.94                | 1.25                 | -0.27               | -0.16             | 0.09               | Ube2l1        | NM_028562.2 | Mus musculus ubiquitin-conjugating enzyme E2 J1 (Ube2l1) mRNA.                                              |
| scd25126.19.1.29-S  | 0.84                | 1.05              | 1.16               | 0.78                  | 0.92                | 1.34                 | -0.13               | -0.19             | 0.21               | Fat1          | NM_007983.2 | Mus musculus F-actin-associated factor 1 (Fat1) mRNA.                                                       |
| scd25133.32.1.60-S  | 1.00                | 1.05              | 1.12               | 0.91                  | 0.85                | 1.13                 | -0.13               | -0.30             | 0.02               | Nrd1          | NM_146150.2 | Mus musculus nardlysin N-arginine diesterase NRD convertase 1 (Nrd1) mRNA.                                  |
| scd25152.5.1.78-S   | 0.86                | 1.02              | 1.26               | 0.72                  | 0.99                | 1.50                 | -0.25               | -0.05             | 0.25               | Magoth        | NM_010760.1 | Mus musculus mago-nashi homolog proliferation-associated (Drosophila) (Magoth) mRNA.                        |
| scd25159.19.1.9-S   | 0.96                | 0.97              | 1.11               | 0.73                  | 0.99                | 1.31                 | -0.39               | 0.03              | 0.25               | 2810475A17Rik | NM_028355.1 | Mus musculus RIKEN cDNA 2810475A17 gene (2810475A17Rik) mRNA.                                               |
| scd25200.12.1.24-S  | 0.93                | 1.07              | 1.37               | 0.86                  | 0.79                | 1.39                 | -0.11               | -0.44             | 0.02               | 2010001C09Rik | NM_025909.1 | Mus musculus RIKEN cDNA 2010001C09 gene (2010001C09Rik) mRNA.                                               |
| scd25240.12.194-S   | 1.12                | 0.97              | 1.09               | 0.95                  | 0.64                | 0.99                 | -0.24               | -0.59             | -0.14              | Pgm2          | NM_028132   | Mus musculus phosphoglucomutase 2 (Pgm2) mRNA.                                                              |
| scd25266.54.1.177-S | 0.97                | 1.02              | 1.14               | 0.79                  | 0.88                | 1.21                 | -0.31               | -0.22             | 0.09               | BC063079      | NM_283933.2 | Mus musculus solute carrier family 31 member 1 (Slc31a1) mRNA.                                              |
| scd25380.5.310-S    | 0.93                | 1.08              | 1.15               | 0.83                  | 0.99                | 1.36                 | -0.16               | -0.12             | 0.23               | Slc31a1       | NM_175090.2 | Mus musculus UDP-glucose ceramide glucosyltransferase (Uggp) mRNA.                                          |
| scd25391.9.273-S    | 0.97                | 1.06              | 1.35               | 0.81                  | 0.88                | 1.40                 | -0.26               | -0.26             | 0.06               | Uggp          | NM_011673   | Mus musculus N-acetylneuraminic acid synthase (sialic acid synthase) (Nans) mRNA.                           |
| scd25461.9.196-S    | 0.97                | 1.02              | 1.15               | 0.82                  | 0.94                | 1.36                 | -0.24               | -0.12             | 0.24               | Nans          | NM_053179.2 | Mus musculus expressed sequence AA959934 (AA959934) mRNA.                                                   |
| scd25472.6.1.2-S    | 0.86                | 0.98              | 1.12               | 0.76                  | 0.96                | 1.46                 | -0.16               | -0.02             | 0.37               | AA959934      | NM_153167.1 |                                                                                                             |
| scd25518.12.3-S     | 1.07                | 1.04              | 1.07               | 0.89                  | 0.80                | 0.93                 | -0.27               | -0.36             | -0.20              | Rusc2         | XM_131380.3 | Mus musculus arginyl-tRNA synthetase-like (Rarsl) mRNA.                                                     |
| scd25562.17.18.7-S  | 1.00                | 0.96              | 1.14               | 0.93                  | 0.81                | 1.40                 | -0.10               | -0.25             | 0.30               | Rarsl         | NM_181406.2 | Mus musculus ubiquitin-conjugating enzyme E2 J1 (Ube2l1) mRNA.                                              |
| scd25574.8.1.15-S   | 0.94                | 1.05              | 1.27               | 0.74                  | 0.89                | 1.14                 | -0.35               | -0.25             | -0.14              | Ube2l1        | NM_028562.2 | Mus musculus mitogen activated protein kinase kinase kinase 7 (Map3k7) mRNA.                                |
| scd25601.18.1.40-S  | 1.06                | 1.27              | 1.27               | 0.77                  | 0.94                | 1.25                 | -0.30               | -0.15             | -0.03              | Map3k7        | NM_172688.1 | Mus musculus cyclin C (Ccnb) mRNA.                                                                          |
| scd25632.14.24-S    | 0.86                | 0.98              | 1.20               | 0.73                  | 1.04                | 1.43                 | -0.24               | 0.09              | 0.25               | Ccnb          | NM_016746.1 | Mus musculus RIKEN cDNA 2610319K07 gene (2610319K07Rik) mRNA.                                               |
| scd25655.8.229-S    | 0.90                | 1.08              | 1.24               | 0.76                  | 0.91                | 1.40                 | -0.23               | -0.24             | 0.17               | 2610319K07Rik | NM_028264.2 | Mus musculus heat shock protein 105 (Hsp105) mRNA.                                                          |
| scd25735.19.37-S    | 0.62                | 1.01              | 0.97               | 0.54                  | 1.22                | 2.31                 | -0.19               | 0.30              | 1.22               | Hsp105        | NM_013559.1 | Mus musculus zinc finger protein 99 (Zfp99) mRNA.                                                           |
| scd25783.3.1.76-S   | 0.86                | 1.21              | 1.20               | 0.74                  | 0.91                | 1.47                 | -0.21               | -0.41             | 0.29               | Zfp99         | NM_023322   | Mus musculus expressed sequence AU022870 (AU022870) mRNA.                                                   |
| scd25797.16.1.2-S   | 0.95                | 1.03              | 1.24               | 0.82                  | 0.94                | 1.22                 | -0.22               | -0.13             | -0.02              | AU022870      | NM_177682.3 | Mus musculus zinc finger DHHC domain containing 4 (Znf404) mRNA.                                            |
| scd25806.10.1.16-S  | 0.97                | 1.03              | 1.19               | 0.90                  | 0.76                | 1.09                 | -0.10               | -0.09             | -0.13              | AU022870      | NM_028373.1 | Mus musculus expressed sequence AA407930 (AA407930) mRNA.                                                   |
| scd25844.10.227-S   | 0.93                | 1.12              | 1.27               | 0.77                  | 0.94                | 1.48                 | -0.28               | -0.29             | -0.12              | AA407930      | NM_136089.2 | Mus musculus RIKEN cDNA 311008217Rik gene (311008217Rik) mRNA.                                              |
| scd25845.8.43-S     | 0.99                | 1.01              | 1.13               | 1.02                  | 0.80                | 1.22                 | -0.04               | -0.32             | 0.11               | 311008217Rik  | NM_028468.1 | Mus musculus DNA segment Chr 5 Wayne State University 46 expressed (DSWsu46e) mRNA.                         |
| scd25868.6.1.19-S   | 0.93                | 1.17              | 1.20               | 0.85                  | 0.85                | 1.12                 | -0.14               | -0.47             | -0.09              | DSWsu46e      | NM_144913.2 | Mus musculus HIV-1 Rev binding protein-like (Hrb) mRNA.                                                     |
| scd25869.12.138-S   | 0.65                | 1.01              | 1.10               | 0.52                  | 1.04                | 1.32                 | -0.33               | 0.05              | 0.27               | Hrb           | NM_178162.2 |                                                                                                             |
| scd25890.5.9.30-S   | 1.01                | 1.01              | 1.02               | 0.89                  | 1.00                | 1.18                 | -0.18               | -0.01             | 0.22               | Znhit1        | XM_357515.1 | Mus musculus adaptor protein complex AP-1 sigma 1 (Ap1s1) mRNA.                                             |
| scd25892.5.96.2-S   | 1.02                | 1.01              | 1.07               | 0.88                  | 0.88                | 1.38                 | -0.22               | -0.20             | 0.36               | Ap1s1         | NM_007457.1 | Mus musculus 3-monooxygenase/tryptophan 5-monooxygenase activation protein gamma polypeptide (Ywhag) mRNA.  |
| scd25917.6.37-S     | 1.02                | 0.99              | 1.20               | 0.86                  | 0.87                | 1.42                 | -0.25               | -0.18             | 0.23               | Ywhag         | NM_018871.2 | Mus musculus Williams Beuren syndrome chromosome region 1 homolog (human) (Wbscr1) mRNA.                    |
| scd25941.1.9.5-S    | 0.98                | 1.07              | 1.28               | 0.87                  | 0.94                | 1.25                 | -0.09               | -0.20             | 0.11               | Wbscr1        | NM_026411.1 | Mus musculus general transcription factor II (GtII) (GtII) mRNA.                                            |
| scd25948.44.208-S   | 0.98                | 1.08              | 1.17               | 0.88                  | 0.88                | 1.30                 | -0.16               | -0.27             | 0.15               | GtII          | XM_289699.2 | Mus musculus expressed sequence A1326906 (A1326906) mRNA.                                                   |
| scd25992.16.1.1-S   | 1.15                | 1.03              | 1.11               | 0.95                  | 0.83                | 0.97                 | -0.29               | -0.30             | -0.20              | Asl           | NM_133768.1 | Mus musculus cDNA sequence BC003324 (BC003324) mRNA.                                                        |
| scd26031.4.1.17-S   | 1.05                | 0.97              | 1.09               | 0.88                  | 0.76                | 1.00                 | -0.26               | -0.33             | -0.12              | BC003324      | NM_030259   | Mus musculus phosphatidylinositol transfer protein membrane-associated 2 (Pitpm2) mRNA.                     |
| scd26041.27.1.85-S  | 1.02                | 1.06              | 1.14               | 0.91                  | 0.76                | 1.01                 | -0.16               | -0.46             | -0.16              | Pitpm2        | NM_011256.1 | Mus musculus 2-5 oligoadenylate synthetase 1C (Oas1c) mRNA.                                                 |
| scd26108.8.1.25-S   | 1.03                | 1.11              | 1.05               | 0.95                  | 0.97                | 1.01                 | -0.12               | -0.21             | -0.06              | Oas1c         | NM_033541.2 | Mus musculus serine dehydratase-like (Sds) mRNA.                                                            |
| scd26118.9.1.34-S   | 0.74                | 1.10              | 1.19               | 0.70                  | 0.95                | 1.49                 | -0.08               | -0.21             | 0.33               | Sds           | NM_133902.2 | Mus musculus ATP binding cassette sub-family B (MDR1/TAP) member 4 (Abcd4) mRNA.                            |
| scd26137.12.266-S   | 0.93                | 1.03              | 1.23               | 0.83                  | 0.86                | 1.33                 | -0.08               | -0.12             | 0.03               | G40003N08Rik  | NM_019821.2 | Mus musculus glycylglycyl transfer protein (Glyt) mRNA.                                                     |
| scd26182.5.119-S    | 0.97                | 1.04              | 1.38               | 0.78                  | 0.82                | 1.37                 | -0.32               | -0.35             | -0.09              | Glyt          | NM_019821.2 | Mus musculus expressed sequence A1326906 (A1326906) mRNA.                                                   |
| scd26224.14.1.3-S   | 0.96                | 1.14              | 1.21               | 0.79                  | 0.97                | 1.37                 | -0.29               | -0.21             | 0.20               | A1326906      | NM_153570.2 | Mus musculus SPARC-like 1 (masp1 hevii) (Sparcl1) mRNA.                                                     |
| scd26291.11.1.15-S  | 1.17                | 1.11              | 1.20               | 0.92                  | 0.78                | 0.94                 | -0.36               | -0.50             | -0.35              | Sparcl1       | NM_010097.2 | Mus musculus kelch-like 8 (Drosophila) (Klhl8) mRNA.                                                        |
| scd26293.11.1.26-S  | 0.94                | 1.07              | 1.09               | 0.82                  | 0.88                | 1.09                 | -0.20               | -0.27             | 0.01               | Klhl8         | NM_178741.2 | Mus musculus G-rich RNA sequence binding factor 1 (Grsf1) mRNA.                                             |
| scd26406.12.265-S   | 0.93                | 1.05              | 1.30               | 0.77                  | 0.89                | 1.22                 | -0.27               | -0.24             | -0.08              | Grsf1         | NM_178700.2 | Mus musculus insulin-like growth factor binding protein 7 (Igfbp7) mRNA.                                    |
| scd26445.6.1.1-S    | 1.07                | 0.89              | 1.11               | 0.79                  | 0.89                | 1.10                 | -0.44               | -0.35             | -0.02              | Igfbp7        | NM_008048.1 | Mus musculus RIKEN cDNA 2810324314 gene (2810324314Rik) mRNA.                                               |
| scd26448.8.1.29-S   | 0.90                | 1.11              | 1.18               | 0.80                  | 0.85                | 1.06                 | -0.22               | -0.41             | 0.09               | 2810324314Rik | NM_028850.1 | Mus musculus replication factor C 1 (Recf1) mRNA.                                                           |
| scd26467.3.1.2-S    | 0.98                | 1.12              | 1.41               | 0.85                  | 0.84                | 1.50                 | -0.22               | -0.41             | 0.09               | Recf1         | NM_011258.1 | Mus musculus WD repeat domain 1 (Wdr1) mRNA.                                                                |
| scd26557.25.455-S   | 0.88                | 1.09              | 1.24               | 0.78                  | 0.86                | 1.17                 | -0.18               | -0.33             | -0.07              | Wdr1          | NM_011715.1 | Mus musculus capping protein (Cno) mRNA.                                                                    |
| scd26663.16.246-S   | 1.15                | 0.97              | 1.12               | 0.95                  | 0.77                | 0.99                 | -0.29               | -0.32             | -0.18              | Cno           | NM_133724.2 | Mus musculus ribokinase (Rbk) mRNA.                                                                         |
| scd26678.1.8.16-S   | 0.93                | 1.09              | 1.25               | 0.83                  | 0.89                | 1.28                 | -0.17               | -0.30             | 0.04               | Rbk           | NM_153196.1 | Mus musculus eukaryotic translation initiation factor 2B subunit 4 delta (Eif2b4) mRNA.                     |
| scd26717.6.1.165-S  | 0.97                | 1.07              | 1.26               | 0.89                  | 0.87                | 1.38                 | -0.12               | -0.30             | 0.14               | 2410018C17Rik | NM_178390.2 | Mus musculus ATP binding cassette sub-family B (MDR1/TAP) member 4 (Abcd4) mRNA.                            |
| scd26728.9.1.113-S  | 0.79                | 1.09              | 1.03               | 0.70                  | 1.03                | 1.23                 | -0.18               | -0.07             | 0.25               | Rbk           | NM_153196.1 | Mus musculus RIKEN cDNA E430026A01Rik gene (E430026A01Rik) mRNA.                                            |
| scd26742.12.1.68-S  | 0.87                | 1.04              | 1.16               | 0.80                  | 0.86                | 1.26                 | -0.12               | -0.17             | 0.12               | Eif2b4        | NM_010221.2 | Mus musculus RIKEN cDNA 270003816Rik gene (270003816Rik) mRNA.                                              |
| scd26912.28.1.161-S | 0.97                | 1.08              | 1.20               | 0.65                  | 0.99                | 1.24                 | -0.26               | -0.10             | 0.10               | Pscd3         | NM_011182.2 | Mus musculus nucleoside diphosphate linked moiety X-type motif 1 (Nudt1) mRNA.                              |
| scd26951.9.50-S     | 0.89                | 1.10              | 1.29               | 0.74                  | 0.86                | 1.61                 | -0.27               | -0.19             | 0.32               | E430026A01Rik | NM_132514.4 | Mus musculus v-mal musculoaponeurotic fibrosarcoma oncogene family protein K (avian) (Malk) mRNA.           |
| scd26959.5.1.79-S   | 0.96                | 1.04              | 1.36               | 0.84                  | 0.89                | 1.55                 | -0.20               | -0.22             | 0.20               | 2510048O06Rik | NM_025624.1 | Mus musculus ADP-ribosylation factor-like 6 interacting protein 4 (Ar6ip4) mRNA.                            |
| scd26965.7.260-S    | 0.91                | 1.11              | 1.39               | 0.75                  | 0.88                | 1.39                 | -0.28               | -0.34             | 0.02               | 270003816Rik  | NM_026298.2 | Mus musculus pleckstrin homology Sec7 and coiled-coil domains 3 (Plectd3) mRNA.                             |
| scd27010.17.214-S   | 0.79                | 1.07              | 1.16               | 0.66                  | 0.99                | 1.24                 | -0.26               | -0.10             | 0.11               | Nudt1         | NM_008637.1 | Mus musculus v-mal musculoaponeurotic fibrosarcoma oncogene family protein K (avian) (Malk) mRNA.           |
| scd27052.5.1.64-S   | 0.92                | 1.00              | 1.19               | 0.79                  | 0.97                | 1.43                 | -0.22               | -0.04             | 0.26               | Nudt1         | NM_008637.1 | Mus musculus RIKEN cDNA 111000715Rik gene (111000715Rik) mRNA.                                              |
| scd27058.3.101-S    | 0.82                | 1.09              | 1.38               | 0.70                  | 0.88                | 1.28                 | -0.24               | -0.31             | -0.11              | Malk          | NM_010751.1 | Mus musculus unc-84 homolog A (C. elegans) (Unc84a) mRNA.                                                   |
| scd27066.10.346-S   | 0.88                | 1.08              | 1.21               | 0.81                  | 0.94                | 1.29                 | -0.12               | -0.21             | 0.21               | 111000715Rik  | NM_026298.1 | Mus musculus RIKEN cDNA 0910001L09Rik gene (0910001L09Rik) mRNA.                                            |
| scd27067.26.61-S    | 0.78                | 1.09              | 1.22               | 0.68                  | 0.97                | 1.45                 | -0.21               | -0.17             | 0.25               | Unc84a        | NM_024451.1 | Mus musculus adaptor-related protein complex AP-4 mu 1 (Apm1) mRNA.                                         |
| scd27078.4.1.81-S   | 1.03                | 1.06              | 1.17               | 0.86                  | 0.65                | 0.98                 | -0.27               | -0.68             | -0.11              | 0910001L09Rik | NM_132434.2 | Mus musculus RIKEN cDNA 2010007H12Rik gene (2010007H12Rik) mRNA.                                            |
| scd27083.14.1.96-S  | 0.93                | 0.97              | 1.06               | 0.99                  | 0.91                | 1.17                 | -0.09               | -0.09             | 0.15               | Apm1          | NM_021392.2 | Mus musculus transferrin receptor 2 (Tfr2) mRNA.                                                            |
| scd27092.3.1.116-S  | 0.82                | 1.07              | 1.16               | 0.70                  | 0.91                | 1.21                 | -0.22               | -0.24             | 0.06               | 2010007H12Rik | NM_027421.2 | Mus musculus polymerase (RNA) I (DNA directed) polypeptide J (Polr2) mRNA.                                  |
| scd27119.4.1.2-S    | 0.77                | 1.00              | 1.10               | 0.72                  | 1.02                | 1.31                 | -0.10               | -0.04             | 0.26               | Tfr2          | NM_015799.2 | Mus musculus chemokine (C-X-C motif) ligand 7 (Cxcl7) mRNA.                                                 |
| scd27179.1.1.2-S    | 0.83                | 0.98              | 1.23               | 0.72                  | 0.84                | 1.26                 | -0.20               | -0.17             | 0.04               | Polr2         | NM_12933.1  | Mus musculus chemokine (C-X-C motif) ligand 7 (Cxcl7) mRNA.                                                 |
| scd27224.37.29-S    | 0.92                | 1.03              | 1.23               | 0.81                  | 0.95                | 1.29                 | -0.25               | -0.11             | 0.08               | Cxcl7         | NM_028785.1 | Mus musculus ADP-ribosylation factor-like 6 interacting protein 4 (Ar6ip4) mRNA.                            |
| scd27242.37.29-S    | 0.92                | 1.04              | 1.13               | 0.83                  | 0.                  |                      |                     |                   |                    |               |             |                                                                                                             |

| Gene Name           | Control 18 Hours | Control 1 Week | Control 4 Weeks | Treatment 18 Hours | Treatment 1 Week | Treatment 4 Weeks | Log2 FC 18 Hours | Log2 FC 1 Week | Log2 FC 4 Weeks | Symbol         | Accession   | Definition                                                                                                                              |
|---------------------|------------------|----------------|-----------------|--------------------|------------------|-------------------|------------------|----------------|-----------------|----------------|-------------|-----------------------------------------------------------------------------------------------------------------------------------------|
| scd28596.5.108-S    | 0.88             | 1.22           | 1.40            | 0.81               | 0.98             | 1.62              | -0.12            | -0.30          | 0.22            | Rybp           | NM_019743.2 | Mus musculus RING1 and YY1 binding protein (Rybp) mRNA.                                                                                 |
| scd28707.14.1.30-S  | 0.61             | 1.01           | 1.19            | 0.51               | 0.99             | 1.41              | -0.29            | -0.00          | 0.27            | Mcm2           | NM_008564.1 | Mus musculus minichromosome maintenance deficient 2 mitotin (S. cerevisiae) (Mcm2) mRNA.                                                |
| scd28709.9.141-S    | 0.89             | 1.10           | 1.16            | 0.83               | 0.93             | 1.23              | -0.09            | -0.23          | -0.09           | Abb1           | NM_030251.1 | Mus musculus ankyrin repeat and BTB (PQZ) domain containing 1 (Abb1) mRNA.                                                              |
| scd28764.6.160-S    | 0.95             | 1.01           | 1.12            | 0.78               | 0.81             | 1.11              | -0.28            | -0.31          | -0.02           | Tex261         | NM_009571.1 | Mus musculus testis expressed gene 261 (Tex261) mRNA.                                                                                   |
| scd28793.10.326-S   | 1.08             | 1.03           | 1.18            | 0.88               | 0.94             | 1.03              | -0.30            | -0.13          | 0.23            | Stenbp         | NM_024298.1 | Mus musculus Sten binding protein (Stenbp) mRNA.                                                                                        |
| scd28799.5.1.30-S   | 0.82             | 1.12           | 1.37            | 0.78               | 0.96             | 1.40              | -0.08            | -0.23          | 0.04            | Dgukc          | NM_013764.1 | Mus musculus decapylguanosine kinase (Dgukc) mRNA.                                                                                      |
| scd28805.5.253-S    | 0.91             | 1.12           | 1.12            | 0.86               | 0.81             | 1.04              | -0.08            | -0.46          | -0.10           | Hmgat14        | NM_023547.1 | Mus musculus high mobility group AT-hook 1-like 4 (Hmgat14) mRNA.                                                                       |
| scd28808.5.1.108-S  | 0.87             | 1.11           | 1.20            | 0.79               | 0.93             | 1.11              | -0.14            | -0.25          | -0.11           | Pres25         | NM_019752.2 | Mus musculus protease serine 25 (Pres25) mRNA.                                                                                          |
| scd28812.19.190-S   | 1.11             | 1.04           | 1.02            | 0.99               | 0.84             | 1.00              | -0.17            | -0.31          | -0.02           | Hk2            | NM_013820.1 | Mus musculus hexokinase 2 (Hk2) mRNA.                                                                                                   |
| scd28865.3.1.49-S   | 0.93             | 1.04           | 1.23            | 0.80               | 0.78             | 1.25              | -0.21            | -0.41          | 0.03            | Vamp8          | NM_016794.2 | Mus musculus vesicle-associated membrane protein 8 (Vamp8) mRNA.                                                                        |
| scd28866.6.2.9-S    | 1.01             | 0.96           | 1.20            | 0.87               | 0.92             | 1.36              | -0.21            | -0.07          | 0.19            | Vamp5          | NM_016872.1 | Mus musculus vesicle-associated membrane protein 5 (Vamp5) mRNA.                                                                        |
| scd28881.9.444-S    | 0.83             | 1.04           | 1.28            | 0.69               | 0.87             | 1.50              | -0.23            | -0.10          | 0.27            | Rplp1          | NM_008398.1 | Mus musculus ribosome S6 phosphate isomerase A (Rplp1) mRNA.                                                                            |
| scd28929.1.29-S     | 1.43             | 1.09           | 1.02            | 0.88               | 0.80             | 1.00              | -0.66            | -0.45          | -0.02           | Taxcd2         | NM_020947.2 | Mus musculus tumor-associated calcium signal transducer 2 (Taxcd2) mRNA.                                                                |
| scd28993.8.275-S    | 1.00             | 0.99           | 1.15            | 0.92               | 0.77             | 1.28              | -0.13            | -0.35          | 0.15            | Hiladh         | NM_145567.1 | Mus musculus 3-hydroxyisobutyrate dehydrogenase (Hiladh) mRNA.                                                                          |
| scd29153.4.406-S    | 1.02             | 1.05           | 1.17            | 0.84               | 0.79             | 1.11              | -0.28            | -0.41          | -0.07           | Mltpn          | NM_008098.2 | Mus musculus myotrophin (Mltpn) mRNA.                                                                                                   |
| scd29166.10.523-S   | 0.98             | 1.04           | 1.19            | 0.84               | 0.81             | 1.11              | -0.22            | -0.36          | -0.10           | Sic35b4        | NM_021435.1 | Mus musculus myotrophin (Mltpn) mRNA.                                                                                                   |
| scd29264.8.1.214-S  | 1.27             | 0.97           | 1.06            | 0.95               | 0.74             | 0.99              | -0.40            | -0.40          | -0.08           | Tflec          | NM_031198.1 | Mus musculus transcription factor EC (Tflec) mRNA.                                                                                      |
| scd29303.3.1.9-S    | 0.97             | 1.03           | 1.15            | 0.82               | 0.88             | 1.19              | -0.23            | -0.22          | 0.06            | Shdg1          | NM_031989.1 | Mus musculus split hand/foot deleted gene 1 (Shdg1) mRNA.                                                                               |
| scd29310.15.098-S   | 0.92             | 1.57           | 1.08            | 1.02               | 0.75             | 1.39              | 0.12             | -0.99          | 0.39            | Pdk4           | NM_013743.1 | Mus musculus pyruvate dehydrogenase kinase isozyme 4 (Pdk4) mRNA.                                                                       |
| scd29346.9.1.7-S    | 1.01             | 1.02           | 1.20            | 0.88               | 0.84             | 1.28              | -0.19            | -0.29          | 0.08            | Mpr35          | NM_145573.1 | Mus musculus mitochondrial ribosomal protein S35 (Mpr35) mRNA.                                                                          |
| scd29355.4.1.15-S   | 0.98             | 1.02           | 1.14            | 0.75               | 0.93             | 1.38              | -0.38            | -0.13          | 0.27            | Surb7          | NM_025351.1 | Mus musculus SRB7 (suppressor of RNA polymerase B) homolog (S. cerevisiae) (Surb7) mRNA.                                                |
| scd29419.1.304-S    | 0.78             | 1.13           | 1.17            | 0.64               | 0.87             | 1.34              | -0.28            | -0.38          | 0.20            | E130307C13     | NM_177688.2 | Mus musculus hypothetical protein E130307C13 (E130307C13) mRNA.                                                                         |
| scd29429.7.143-S    | 1.08             | 0.88           | 1.26            | 0.89               | 0.74             | 1.11              | -0.29            | -0.26          | -0.18           | Emp1           | NM_010128.3 | Mus musculus epithelial membrane protein 1 (Emp1) mRNA.                                                                                 |
| scd29514.8.22.6-S   | 0.95             | 1.11           | 1.32            | 0.82               | 0.90             | 1.38              | -0.20            | -0.30          | 0.06            | Mif2           | NM_145385.1 | Mus musculus myeloid leukemia factor 2 (Mif2) mRNA.                                                                                     |
| scd29560.8.488-S    | 0.80             | 1.04           | 1.10            | 0.67               | 0.97             | 1.37              | -0.26            | -0.09          | 0.32            | Bcl2l13        | NM_153516.1 | Mus musculus BCL2-like 13 (apoptosis facilitator) (Bcl2l13) mRNA.                                                                       |
| scd29564.4.468-S    | 0.86             | 1.09           | 1.13            | 0.78               | 0.95             | 1.41              | -0.13            | -0.19          | 0.32            | Zfp637         | NM_176842.2 | Mus musculus zinc finger protein 2 (Zfp637) mRNA.                                                                                       |
| scd29606.9.357-S    | 0.92             | 1.03           | 1.27            | 0.90               | 0.86             | 1.07              | -0.10            | -0.28          | 0.08            | Mlx1           | NM_023901.1 | Mus musculus makorin ring finger protein 2 (Mlx1) mRNA.                                                                                 |
| scd29636.20.1.18-S  | 0.96             | 1.08           | 1.16            | 0.88               | 0.84             | 1.08              | -0.13            | -0.37          | -0.10           | 1110061004Rik  | NM_026849   | Mus musculus RIKEN cDNA 1110061004 gene (1110061004Rik) mRNA.                                                                           |
| scd29671.63.470-S   | 0.95             | 1.12           | 1.39            | 0.83               | 0.82             | 1.24              | -0.20            | -0.43          | -0.16           | Itpri1         | NM_010585.2 | Mus musculus inositol 145-triphosphate receptor 1 (Itpri1) mRNA.                                                                        |
| scd29678.2.366-S    | 1.03             | 1.06           | 1.13            | 0.88               | 0.76             | 1.02              | -0.23            | -0.46          | -0.15           | Lrm1           | NM_008516.1 | Mus musculus leucine rich repeat protein 1 neuronal (Lrm1) mRNA.                                                                        |
| scd29679.10.1.75-S  | 0.88             | 1.04           | 1.34            | 0.76               | 0.99             | 1.56              | -0.22            | -0.09          | 0.22            | Tmt1           | NM_027296.1 | Mus musculus tRNA nucleotidyl transferase CCA-adding 1 (Tmt1) mRNA.                                                                     |
| scd29713.3.34-S     | 0.99             | 0.97           | 1.23            | 0.86               | 0.77             | 1.13              | -0.21            | -0.33          | -0.12           | Ar6p5          | NM_022992.1 | Mus musculus ADP-ribosylation factor-like 6 interacting protein 5 (Ar6p5) mRNA.                                                         |
| scd29744.12.19-S    | 1.09             | 1.03           | 1.21            | 0.90               | 0.85             | 1.17              | -0.16            | -0.28          | -0.17           | 11100515A22Rik | NM_028765.1 | Mus musculus RIKEN cDNA 11100515A22 gene (11100515A22Rik) mRNA.                                                                         |
| scd29752.9.268-S    | 1.00             | 1.01           | 1.06            | 0.97               | 0.95             | 1.05              | -0.04            | -0.24          | -0.02           | BC020332       | NM_023032.2 | Mus musculus cDNA sequence BC020332 (BC020332) mRNA.                                                                                    |
| scd29780.26.154-S   | 0.92             | 1.07           | 1.13            | 0.96               | 0.84             | 1.23              | 0.06             | -0.35          | 0.13            | Copg           | NM_017477.1 | Mus musculus coatomer protein complex subunit gamma (Copg) mRNA.                                                                        |
| scd29800.9.1.6-S    | 0.87             | 1.08           | 1.24            | 0.89               | 0.95             | 1.42              | 0.03             | -0.18          | 0.19            | C87436         | NM_146170.2 | Mus musculus expressed sequence C87436 (C87436) mRNA.                                                                                   |
| scd29820.13.336-S   | 0.95             | 1.04           | 1.17            | 0.84               | 0.98             | 1.49              | -0.18            | -0.07          | 0.36            | Ccl7           | NM_007638.2 | Mus musculus chaperonin subunit 7 (eta) (Ccl7) mRNA.                                                                                    |
| scd29824.1.5.102-S  | 1.13             | 0.83           | 1.14            | 0.85               | 0.92             | 1.88              | -0.41            | 0.15           | 0.76            | Npm3           | NM_008723.1 | Mus musculus nucleolin (Npm3) mRNA.                                                                                                     |
| scd29846.4.459-S    | 0.95             | 1.01           | 1.24            | 0.86               | 0.95             | 1.48              | -0.15            | -0.10          | 0.26            | Gcs1           | NM_020619.2 | Mus musculus glucosylase 1 (Gcs1) mRNA.                                                                                                 |
| scd29852.1.47-S     | 0.76             | 1.02           | 1.28            | 0.68               | 0.85             | 1.72              | -0.16            | -0.08          | 0.45            | Mpr53          | NM_026741.1 | Mus musculus mitochondrial ribosomal protein L53 (Mpr53) mRNA.                                                                          |
| scd29861.1.168-S    | 0.91             | 1.43           | 1.43            | 0.81               | 0.91             | 1.60              | -0.09            | -0.22          | 0.17            | BC014699       | NM_024570.1 | Mus musculus cDNA sequence BC014699 (BC014699) mRNA.                                                                                    |
| scd29949.25.447-S   | 0.90             | 1.05           | 1.19            | 0.81               | 0.91             | 1.18              | -0.14            | -0.22          | 0.07            | Smarcd1        | XM_132593.3 | Mus musculus SWI/SNF-related matrix-associated actin-dependent regulator of chromatin subfamily a containing DEAD/box 1 (Smarcd1) mRNA. |
| scd30036.21.295-S   | 1.00             | 1.04           | 1.21            | 0.87               | 0.87             | 1.27              | -0.20            | -0.26          | 0.07            | Tax1bp1        | NM_025816.1 | Mus musculus Tax1 (human T-cell leukemia virus type II binding protein 1 (Tax1bp1) mRNA.                                                |
| scd30048.11.144-S   | 1.13             | 0.88           | 1.27            | 0.85               | 0.65             | 1.17              | -0.42            | -0.44          | -0.12           | Snx10          | NM_028035.2 | Mus musculus sorting nexin 10 (Snx10) mRNA.                                                                                             |
| scd30066.5.708-S    | 0.96             | 1.09           | 1.11            | 0.84               | 0.85             | 1.05              | -0.20            | -0.34          | -0.08           | 6330407D12Rik  | NM_175098.2 | Mus musculus RIKEN cDNA 6330407D12 gene (6330407D12Rik) mRNA.                                                                           |
| scd30177.14.1.175-S | 0.98             | 1.01           | 1.17            | 0.83               | 0.75             | 1.11              | -0.24            | -0.43          | -0.08           | Tbwa1          | NM_011539.2 | Mus musculus thrombospondin A synthase 1 platelet (Tbwa1) mRNA.                                                                         |
| scd30210.43.1.46-S  | 0.92             | 1.08           | 1.33            | 0.76               | 0.97             | 1.43              | -0.28            | -0.17          | 0.11            | Nup205         | XM_133074.3 | Mus musculus SEC8-like 1 (S. cerevisiae) (Sec8l1) mRNA.                                                                                 |
| scd30230.21.1.91-S  | 0.95             | 0.98           | 1.20            | 0.79               | 0.85             | 1.37              | -0.27            | -0.20          | 0.18            | Ppp19a         | NM_026448.1 | Mus musculus protein phosphatase 1 regulatory (inhibitor) subunit 9A (Ppp19a) mRNA.                                                     |
| scd30419.24.421-S   | 0.99             | 1.04           | 1.27            | 0.85               | 0.90             | 1.31              | -0.22            | -0.20          | 0.05            | Ppp19a         | NM_181595.2 | Mus musculus protein phosphatase 1 regulatory (inhibitor) subunit 9A (Ppp19a) mRNA.                                                     |
| scd30446.19.1.20-S  | 1.01             | 1.01           | 1.04            | 0.91               | 0.83             | 1.01              | -0.14            | -0.29          | -0.04           | 9130012B15Rik  | NM_030221.1 | Mus musculus RIKEN cDNA 9130012B15 gene (9130012B15Rik) mRNA.                                                                           |
| scd30499.14.1.7-S   | 0.98             | 1.03           | 1.13            | 0.94               | 0.77             | 1.12              | -0.07            | -0.42          | -0.01           | Rnh1           | NM_145135.2 | Mus musculus ribonuclease/angiogenesis inhibitor 1 (Rnh1) mRNA.                                                                         |
| scd30561.16.1.47-S  | 0.98             | 1.02           | 1.09            | 0.90               | 0.90             | 1.16              | -0.13            | -0.18          | 0.09            | Dhc32          | NM_133941.1 | Mus musculus DEAH (Asp-Glu-Ala-His) box polypeptide 32 (Dhc32) mRNA.                                                                    |
| scd30629.5.1.26-S   | 1.02             | 0.99           | 1.29            | 0.84               | 0.80             | 1.45              | -0.28            | -0.31          | 0.17            | Vkorc1         | NM_178600.2 | Mus musculus vitamin K epoxide reductase complex subunit 1 (Vkorc1) mRNA.                                                               |
| scd30655.6.70-S     | 0.91             | 1.10           | 1.31            | 0.84               | 0.90             | 1.41              | -0.11            | -0.30          | 0.12            | Cdcbp2         | NM_027353.2 | Mus musculus CD2 antigen (cytoplasmic tail) binding protein 2 (Cdcbp2) mRNA.                                                            |
| scd30657.16.1.159-S | 1.30             | 0.97           | 1.08            | 0.98               | 0.91             | 0.98              | -0.43            | -0.32          | 0.18            | Mpr1           | NM_086383.1 | Mus musculus major vaultin (Mpr1) mRNA.                                                                                                 |
| scd30678.8.112-S    | 0.98             | 1.11           | 1.09            | 1.07               | 0.59             | 1.09              | 0.12             | -0.90          | 0.02            | Sult1a1        | NM_133670.1 | Mus musculus sulfotransferase family 1A phenol-preferring member 1 (Sult1a1) mRNA.                                                      |
| scd30702.10.1.59-S  | 0.92             | 1.10           | 1.23            | 0.80               | 0.87             | 1.23              | -0.20            | -0.33          | 0.00            | 2510027N19Rik  | NM_026330.2 | Mus musculus RIKEN cDNA 2510027N19 gene (2510027N19Rik) mRNA.                                                                           |
| scd30727.6.1.169-S  | 1.42             | 0.99           | 1.07            | 1.06               | 0.61             | 0.97              | -0.46            | -0.67          | -0.14           | Igsf6          | NM_030691.1 | Mus musculus immunoglobulin superfamily member 6 (Igsf6) mRNA.                                                                          |
| scd30734.8.1.4-S    | 1.03             | 1.03           | 1.17            | 0.96               | 0.83             | 1.15              | -0.09            | -0.31          | -0.02           | Crym           | NM_016669.1 | Mus musculus crystallin mu (Crym) mRNA.                                                                                                 |
| scd30753.7.1.3-S    | 0.77             | 1.02           | 1.17            | 0.72               | 0.96             | 1.42              | -0.10            | -0.09          | 0.28            | Mir16          | NM_019503.3 | Mus musculus membrane interacting protein of RGS16 (Mir16) mRNA.                                                                        |
| scd30761.7.1.4-S    | 0.80             | 1.05           | 1.29            | 0.72               | 0.94             | 1.37              | -0.16            | -0.16          | 0.10            | Ar6p1          | NM_019419.1 | Mus musculus ADP-ribosylation factor-like 6 interacting protein 1 (Ar6p1) mRNA.                                                         |
| scd30792.12.1.207-S | 0.89             | 1.03           | 1.20            | 0.75               | 0.82             | 1.20              | -0.26            | -0.10          | 0.11            | 1110056N09Rik  | NM_026741.1 | Mus musculus RIKEN cDNA 1110056N09 gene (1110056N09Rik) mRNA.                                                                           |
| scd30798.9.425-S    | 1.09             | 1.08           | 1.05            | 0.84               | 0.77             | 1.10              | -0.38            | -0.48          | 0.06            | Dk3            | NM_015814.2 | Mus musculus dickkopf homolog 3 (Xenopus laevis) (Dk3) mRNA.                                                                            |
| scd30825.22.142-S   | 0.94             | 1.08           | 1.32            | 0.81               | 0.87             | 1.20              | -0.22            | -0.31          | -0.13           | Rab6ip1        | NM_021494.1 | Mus musculus Rab6 interacting protein 1 (Rab6ip1) mRNA.                                                                                 |
| scd30830.6.4-S      | 0.96             | 1.05           | 1.16            | 0.78               | 0.80             | 1.21              | -0.30            | -0.39          | 0.05            | 2310004K06Rik  | NM_020501.1 | Mus musculus RIKEN cDNA 2310004K06 gene (2310004K06Rik) mRNA.                                                                           |
| scd30833.27.114-S   | 0.85             | 1.05           | 1.13            | 0.76               | 0.97             | 1.43              | -0.17            | -0.09          | 0.35            | Sis5           | NM_029811.1 | Mus musculus suppression of tumorigenicity 5 (Sis5) mRNA.                                                                               |
| scd30988.16.625-S   | 0.92             | 1.09           | 1.15            | 0.81               | 0.92             | 1.31              | -0.19            | -0.24          | 0.19            | 2700017M01Rik  | NM_028292.1 | Mus musculus RIKEN cDNA 2700017M01 gene (2700017M01Rik) mRNA.                                                                           |
| scd31009.10.67-S    | 1.06             | 1.06           | 1.00            | 0.92               | 0.68             | 1.06              | -0.21            | -0.65          | 0.09            | Dgat2          | NM_026384.2 | Mus musculus diacylglycerol C-acyltransferase 2 (Dgat2) mRNA.                                                                           |
| scd31053.2.1.38-S   | 1.06             | 0.92           | 1.27            | 0.87               | 0.81             | 1.34              | -0.29            | -0.19          | 0.08            | 1810020E01Rik  | NM_025460.1 | Mus musculus RIKEN cDNA 1810020E01 gene (1810020E01Rik) mRNA.                                                                           |
| scd31056.12.1.57-S  | 0.90             | 1.06           | 1.25            | 0.76               | 0.93             | 1.25              | -0.24            | -0.20          | 0.00            | Eed            | NM_021876.1 | Mus musculus embryonic ectoderm development (Eed) mRNA.                                                                                 |
| scd31133.10.1.10-S  | 1.05             | 1.10           | 1.19            | 0.95               | 0.80             | 1.11              | -0.15            | -0.45          | -0.09           | Idh2           | NM_173011.1 | Mus musculus isocitrate dehydrogenase 2 (NADP+) mitochondrial (Idh2) mRNA.                                                              |
| scd31161.4.1.8-S    | 0.92             | 1.03           | 1.24            | 0.85               | 0.89             | 1.42              | -0.12            | -0.21          | 0.20            | Mpr46          | NM_023331.2 | Mus musculus mitochondrial ribosomal protein L46 (Mpr46) mRNA.                                                                          |
| scd31222.7.115.17-S | 1.10             | 1.04           | 1.10            | 0.94               | 0.84             | 0.97              | -0.22            | -0.31          | -0.19           | Dmn            | NM_207663.2 | Mus musculus desmulin (Dmn) transcript variant 1 mRNA.                                                                                  |
| scd31224.16.382-S   | 0.89             | 1.13           | 1.16            | 0.85               | 0.88             | 1.15              | -0.07            | -0.36          | -0.01           | Lrrc28         | NM_175124.3 | Mus musculus necdin-like 2 (Ndn2) mRNA.                                                                                                 |
| scd31245.1.43.5-S   | 0.81             | 1.03           | 1.21            | 0.75               | 0.93             | 1.39              | -0.12            | -0.15          | 0.21            | Ndn2           | NM_023239.3 | Mus musculus necdin-like 2 (Ndn2) mRNA.                                                                                                 |
| scd31392.8.1.1-S    | 0.99             | 1.01           | 1.25            | 0.92               | 0.67             | 1.18              | -0.12            | -0.59          | -0.10           | Fcgrt          | NM_010188.1 | Mus musculus Fc receptor gamma chain transporter (Fcgrt) mRNA.                                                                          |
| scd31412.2.1.74-S   | 0.88             | 1.06           | 1.20            | 0.78               | 0.92             | 1.21              | -0.26            | -0.18          | 0.11            | Pold1          | NM_011137.2 | Mus musculus polymerase (DNA directed) delta 1 catalytic subunit (Pold1) mRNA.                                                          |
| scd31415.7.3-S      | 0.93             | 1.05           | 1.18            | 0.80               | 0.91             | 1.14              | -0.21            | -0.20          | -0.05           | 2310044H10Rik  | NM_179791   | Mus musculus RIKEN cDNA 2310044H10 gene (2310044H10Rik) mRNA.                                                                           |
| scd31550.23.1.53-S  | 0.95             | 1.01</         |                 |                    |                  |                   |                  |                |                 |                |             |                                                                                                                                         |

| Gene Name          | Control 18 Hours | Control 1 Week | Control 4 Weeks | Treatment 18 Hours | Treatment 1 Week | Treatment 4 Weeks | Log2 FC 18 Hours | Log2 FC 1 Week | Log2 FC 4 Weeks | Symbol        | Accession   | Definition                                                                                                   |
|--------------------|------------------|----------------|-----------------|--------------------|------------------|-------------------|------------------|----------------|-----------------|---------------|-------------|--------------------------------------------------------------------------------------------------------------|
| sd32211.7.1 6-S    | 0.87             | 1.07           | 1.25            | 0.78               | 0.89             | 1.25              | -0.16            | -0.27          | 0.00            | Eif3a5        | NM_025344   | Mus musculus eukaryotic translation initiation factor 3 subunit 5 (epsilon) (Eif3a5) mRNA.                   |
| sd32311.12 300-S   | 0.87             | 1.09           | 1.17            | 0.88               | 0.93             | 1.22              | 0.00             | -0.24          | -0.06           | Rab6          | NM_024287.2 | Mus musculus RAB6 member RAS oncogene family (Rab6) mRNA.                                                    |
| sd32346.12 306-S   | 0.96             | 1.11           | 1.31            | 0.84               | 0.87             | 1.18              | -0.20            | -0.34          | -0.15           | Hbxap         | XM_133622.3 | Mus musculus hypothetical protein Hbxap (Hbxap) mRNA.                                                        |
| sd32421.3 11-S     | 0.98             | 0.95           | 1.03            | 0.86               | 0.90             | 1.18              | -0.19            | -0.08          | 0.20            | Rab38         | NM_026230.5 | Mus musculus Rab38 member of RAS oncogene family (Rab38) mRNA.                                               |
| sd32436.36 67-S    | 0.76             | 1.01           | 1.27            | 0.79               | 0.87             | 1.43              | -0.07            | -0.03          | 0.25            | BC025462      | NM_145594.1 | Mus musculus cDNA sequence BC025462 (BC025462) mRNA.                                                         |
| sd32499.13.1 37-S  | 0.96             | 1.05           | 1.07            | 0.80               | 0.92             | 1.19              | -0.27            | -0.20          | 0.15            | Abhd2         | NM_018811.4 | Mus musculus aldehyde dehydrogenase domain containing 2 (Abhd2) mRNA.                                        |
| sd32537.2.218 88-S | 1.01             | 1.09           | 1.18            | 0.93               | 0.75             | 1.10              | -0.11            | -0.54          | -0.10           | Rgma          | NM_177740.2 | Mus musculus RGM domain family member A (Rgma) mRNA.                                                         |
| sd32570.6.1 25-S   | 1.00             | 0.99           | 1.21            | 0.96               | 0.72             | 1.31              | -0.06            | -0.42          | 0.12            | H47           | NM_024439.2 | Mus musculus histocompatibility 47 (H47) mRNA.                                                               |
| sd32577.4.1 30-S   | 0.95             | 1.06           | 1.10            | 0.81               | 0.83             | 1.21              | -0.21            | -0.36          | 0.14            | Mcee          | XM_133510.4 |                                                                                                              |
| sd32630.18 440-S   | 0.99             | 1.02           | 1.19            | 0.84               | 0.86             | 1.23              | -0.24            | -0.25          | 0.07            | Hrm1l3        | NM_133740.1 | Mus musculus heterogeneous nuclear ribonucleoprotein methyltransferase-like 3 (S. cerevisiae) (Hrm1l3) mRNA. |
| sd32640.18.1 14-S  | 0.97             | 1.01           | 1.26            | 0.89               | 0.94             | 1.33              | -0.11            | -0.11          | 0.08            | Zfhnc13       | NM_028031.1 |                                                                                                              |
| sd32648.17 169-S   | 0.89             | 1.01           | 1.27            | 0.80               | 0.87             | 1.50              | -0.15            | -0.30          | 0.21            | Gzil21        | NM_145941.1 | Mus musculus general transcription factor II H polypeptide 1 (Gzil21) mRNA.                                  |
| sd32698.6.1 30-S   | 0.95             | 1.11           | 1.19            | 0.83               | 0.89             | 1.26              | -0.19            | -0.31          | 0.10            | Itf3          | NM_016849.2 | Mus musculus interferon regulatory factor 3 (Itf3) mRNA.                                                     |
| sd32785.20.1 122-S | 0.89             | 1.06           | 1.28            | 0.78               | 0.98             | 1.38              | -0.18            | -0.11          | 0.11            | 2610507L03Rik | NM_028120.1 | Mus musculus RIKEN cDNA 2610507L03 gene (2610507L03Rik) mRNA.                                                |
| sd32856.10.1 9-S   | 1.03             | 1.14           | 1.19            | 0.90               | 0.90             | 1.11              | -0.20            | -0.35          | -0.10           | Ech1          | NM_016772.1 | Mus musculus enoyl coenzyme A hydratase 1, peroxisomal (Ech1) mRNA.                                          |
| sd32892.12 87-S    | 0.89             | 1.02           | 1.30            | 0.69               | 0.92             | 1.34              | -0.37            | -0.15          | 0.06            | 2310022A10Rik | NM_175107   | Mus musculus RIKEN cDNA 2310022A10 gene (2310022A10Rik) mRNA.                                                |
| sd32923.6.1 33-S   | 1.01             | 0.97           | 1.15            | 0.91               | 0.77             | 1.14              | -0.16            | -0.34          | -0.01           | Exosc5        | NM_138586.1 | Mus musculus exosome component 5 (Exosc5) mRNA.                                                              |
| sd32925.7 312-S    | 0.93             | 1.04           | 1.15            | 0.86               | 0.74             | 1.14              | -0.10            | -0.47          | 0.00            | 2310004L02Rik | NM_025504.2 | Mus musculus RIKEN cDNA 2310004L02 gene (2310004L02Rik) mRNA.                                                |
| sd32942.2 608-S    | 0.81             | 1.08           | 1.28            | 0.80               | 0.92             | 1.24              | -0.19            | -0.24          | -0.03           | Zfp574        | NM_175477.2 |                                                                                                              |
| sd32962.7.1 133-S  | 1.04             | 1.11           | 1.17            | 0.87               | 0.91             | 1.04              | -0.24            | -0.28          | -0.17           | Plaur         | NM_011113.2 | Mus musculus urokinase plasminogen activator receptor (Plaur) mRNA.                                          |
| sd33021.4.288 87-S | 1.29             | 1.55           | 0.69            | 1.11               | 1.05             | 0.75              | -0.19            | -0.56          | 0.19            | Pglyrp1       | NM_009402.1 | Mus musculus peptidoglycan recognition protein 1 (Pglyrp1) mRNA.                                             |
| sd33059.9.1 102-S  | 0.99             | 1.04           | 1.16            | 0.88               | 0.86             | 1.17              | -0.17            | -0.27          | 0.01            | Kpfn          | NM_133727.1 | Mus musculus kaptin (Kpfn) mRNA.                                                                             |
| sd33060.10 5-S     | 0.91             | 1.06           | 1.10            | 0.86               | 0.96             | 1.14              | -0.09            | -0.15          | 0.05            | Napa          | NM_025891.1 | Mus musculus N-ethylmaleimide sensitive fusion protein attachment protein alpha (Napa) mRNA.                 |
| sd33074.8.142 21-S | 0.90             | 1.09           | 1.29            | 0.79               | 0.88             | 1.31              | -0.19            | -0.31          | 0.03            | Rps5          | NM_009095   | Mus musculus ribosomal protein S5 (Rps5) mRNA.                                                               |
| sd33163.3.1 18-S   | 0.95             | 1.05           | 1.25            | 0.78               | 0.89             | 1.41              | -0.29            | -0.24          | 0.17            | 1810063B05Rik | NM_174987.2 | Mus musculus RIKEN cDNA 1810063B05 gene (1810063B05Rik) mRNA.                                                |
| sd33177.3 75-S     | 0.96             | 0.88           | 1.28            | 0.85               | 0.87             | 1.26              | -0.18            | -0.31          | -0.01           | Tmxk          | NM_019119.1 | Mus musculus transferrin-associated factor 2 (Tmxk) mRNA.                                                    |
| sd33230.10 515-S   | 1.03             | 1.03           | 1.10            | 0.86               | 0.91             | 1.43              | -0.19            | 0.00           | 0.28            | Zfp1          | NM_009591.1 | Mus musculus zinc finger protein multiple 1 (Zfp1) mRNA.                                                     |
| sd33261.5 41-S     | 0.98             | 0.95           | 1.07            | 0.83               | 0.68             | 1.07              | -0.24            | -0.48          | 0.00            | Hspb1         | NM_024219.1 | Mus musculus heat shock factor binding protein 1 (Hspb1) mRNA.                                               |
| sd33279.12.1 23-S  | 0.78             | 1.08           | 1.15            | 0.73               | 0.97             | 1.35              | -0.07            | -0.16          | 0.23            | 2610510J17Rik | NM_028131.1 | Mus musculus RIKEN cDNA 2610510J17 gene (2610510J17Rik) mRNA.                                                |
| sd33327.2 154-S    | 0.95             | 1.06           | 1.30            | 0.82               | 0.88             | 1.28              | -0.22            | -0.27          | -0.02           | BC025546      | NM_146215.2 | Mus musculus cDNA sequence BC025546 (BC025546) mRNA.                                                         |
| sd33390.7 348-S    | 1.04             | 0.98           | 1.25            | 0.92               | 0.65             | 1.15              | -0.18            | -0.58          | -0.12           | Lypla3        | NM_133792.2 | Mus musculus lysophospholipase 3 (Lypla3) mRNA.                                                              |
| sd33402.1 220-S    | 0.81             | 1.10           | 1.20            | 0.73               | 0.93             | 1.35              | -0.14            | -0.24          | 0.17            | Thap11        | NM_021513.1 | Mus musculus THAP domain containing 11 (Thap11) mRNA.                                                        |
| sd33416.4.1 0-S    | 0.95             | 1.03           | 1.20            | 0.83               | 0.89             | 1.08              | -0.20            | -0.22          | -0.15           | Hspc17        | NM_028651.1 |                                                                                                              |
| sd33425.15 229-S   | 1.04             | 0.98           | 1.21            | 0.87               | 0.94             | 1.16              | -0.12            | -0.08          | 0.02            | 230025016Rik  | NM_145694.1 |                                                                                                              |
| sd33480.16 131-S   | 0.96             | 1.12           | 1.25            | 0.80               | 0.89             | 1.17              | -0.27            | -0.32          | -0.09           | 4930470D19Rik | NM_026274.2 | Mus musculus RIKEN cDNA 4930470D19 gene (4930470D19Rik) mRNA.                                                |
| sd33513.12 427-S   | 0.98             | 1.00           | 1.14            | 0.83               | 0.88             | 1.26              | -0.23            | -0.19          | 0.15            | Flo           | NM_011936.1 | Mus musculus fatso (Flo) mRNA.                                                                               |
| sd33605.4 245-S    | 0.55             | 1.04           | 1.26            | 0.46               | 0.97             | 2.06              | -0.27            | -0.11          | 0.70            | Dnabp1        | NM_018808.1 | Mus musculus Dnal (Hsp40) homolog subfamily B member 1 (Dnabp1) mRNA.                                        |
| sd33659.17.1 21-S  | 0.73             | 1.07           | 1.10            | 0.62               | 1.04             | 1.40              | -0.26            | -0.03          | 0.36            | Mcm5          | NM_008561.1 | Mus musculus minichromosome maintenance deficient 5 cell division cycle 46 (S. cerevisiae) (Mcm5) mRNA.      |
| sd33660.5 397-S    | 1.04             | 0.83           | 1.37            | 0.76               | 0.57             | 1.22              | -0.48            | -0.54          | -0.17           | Hmxo1         | NM_010442.1 | Mus musculus heme oxygenase (decycling) 1 (Hmxo1) mRNA.                                                      |
| sd33662.2 157-S    | 0.97             | 1.14           | 1.02            | 0.87               | 0.88             | 1.04              | -0.29            | -0.37          | 0.04            | F2r3          | NM_027975.2 | Mus musculus coagulation factor II (thrombin) receptor-like 3 (F2r3) mRNA.                                   |
| sd33678.12.1 84-S  | 0.99             | 1.10           | 1.13            | 0.85               | 0.91             | 1.08              | -0.45            | -0.19          | 0.07            | Ap1m1         | NM_025396.1 | Mus musculus adaptor-related protein complex AP-1 mu subunit 1 (Ap1m1) mRNA.                                 |
| sd33694.4.1 117-S  | 0.96             | 1.06           | 1.14            | 0.91               | 0.83             | 1.11              | -0.08            | -0.35          | -0.04           | Ptgs          | NM_025396.1 | Mus musculus 6-phosphogluconolactonase (Ptgs) mRNA.                                                          |
| sd33701.2.1 102-S  | 0.88             | 0.96           | 1.16            | 0.76               | 1.01             | 1.42              | -0.20            | 0.07           | 0.29            | Mrip34        | NM_053162.1 | Mus musculus mitochondrial ribosomal protein L34 (Mrip34) mRNA.                                              |
| sd33747.13.1 5-S   | 0.96             | 1.04           | 1.21            | 0.93               | 0.84             | 1.31              | -0.04            | -0.30          | 0.12            | Atp13a        | NM_133224.1 | Mus musculus ATPase type 13A (Atp13a) mRNA.                                                                  |
| sd33753.14 134-S   | 1.01             | 0.99           | 1.27            | 0.78               | 0.84             | 1.20              | -0.38            | -0.24          | -0.07           | Atp6v1b2      | NM_007509.2 | Mus musculus ATPase H+ transporting V1 subunit B isoform 2 (Atp6v1b2) mRNA.                                  |
| sd33833.8 84-S     | 1.06             | 0.95           | 1.13            | 0.87               | 0.83             | 1.44              | -0.30            | -0.21          | 0.35            | Dctd          | NM_178788.1 | Mus musculus dCMP deaminase (Dctd) mRNA.                                                                     |
| sd33841.11 453-S   | 0.96             | 1.15           | 1.38            | 0.82               | 0.92             | 1.31              | -0.23            | -0.32          | -0.07           | Itf2          | NM_003931.2 | Mus musculus interferon regulatory factor 2 (Itf2) mRNA.                                                     |
| sd33848.4 1084-S   | 0.83             | 1.02           | 1.20            | 0.80               | 0.83             | 1.12              | -0.21            | -0.30          | 0.08            | 4933411K20Rik | NM_028131.1 | Mus musculus RIKEN cDNA 4933411K20 gene (4933411K20Rik) mRNA.                                                |
| sd33851.12.1 1-S   | 1.15             | 1.01           | 1.12            | 0.82               | 0.85             | 1.29              | -0.32            | -0.36          | -0.17           | 1810047C23Rik | NM_138668.1 | Mus musculus RIKEN cDNA 1810047C23 gene (1810047C23Rik) mRNA.                                                |
| sd33916.7 57-S     | 0.94             | 1.06           | 1.32            | 0.86               | 0.80             | 1.36              | -0.13            | -0.39          | 0.04            | 1810045K07Rik | NM_026432.2 | Mus musculus RIKEN cDNA 1810045K07 gene (1810045K07Rik) mRNA.                                                |
| sd33920.14 231-S   | 1.03             | 0.98           | 1.11            | 0.86               | 0.78             | 1.15              | -0.26            | -0.33          | 0.04            | Gsr           | NM_010344.3 | Mus musculus glutathione reductase 1 (Gsr) mRNA.                                                             |
| sd33924.6.9 11-S   | 0.95             | 1.05           | 1.24            | 0.77               | 0.87             | 1.39              | -0.30            | -0.27          | 0.18            | Ppp2cb        | NM_013734.2 | Mus musculus protein phosphatase 2a catalytic subunit beta isoform (Ppp2cb) mRNA.                            |
| sd34059.10 20-S    | 0.97             | 0.99           | 1.27            | 0.83               | 0.75             | 1.12              | -0.25            | -0.41          | -0.18           | Lamp1         | NM_010684   | Mus musculus lysosomal membrane glycoprotein 1 (Lamp1) mRNA.                                                 |
| sd34132.19.1 1-S   | 1.04             | 1.02           | 1.06            | 0.95               | 0.76             | 0.99              | -0.13            | -0.43          | -0.09           | Shcp2         | NM_011503.2 | Mus musculus syntrophin binding protein 2 (Shcp2) mRNA.                                                      |
| sd34177.5 600-S    | 0.83             | 1.07           | 1.24            | 0.81               | 0.87             | 1.24              | -0.19            | -0.30          | 0.18            | 2310022B05Rik | NM_175477.2 | Mus musculus RIKEN cDNA 2310022B05 gene (2310022B05Rik) mRNA.                                                |
| sd34222.1 277-S    | 0.94             | 1.11           | 1.27            | 0.82               | 0.84             | 1.21              | -0.19            | -0.39          | -0.08           | Rnt166        | XM_134599.3 |                                                                                                              |
| sd34224.8.1 50-S   | 1.06             | 1.02           | 1.24            | 0.88               | 0.69             | 1.15              | -0.26            | -0.57          | -0.10           | Cyba          | NM_007806.1 | Mus musculus cytochrome b-245 alpha polypeptide (Cyba) mRNA.                                                 |
| sd34266.7 421-S    | 0.93             | 1.10           | 1.30            | 0.79               | 0.90             | 1.27              | -0.24            | -0.29          | -0.03           | 2700067E09Rik | NM_175185.2 | Mus musculus RIKEN cDNA 2700067E09 gene (2700067E09Rik) mRNA.                                                |
| sd34274.4 380-S    | 1.06             | 1.03           | 1.03            | 0.92               | 0.79             | 1.09              | -0.21            | -0.38          | 0.08            | 4632417N05Rik | NM_028725.1 | Mus musculus RIKEN cDNA 4632417N05 gene (4632417N05Rik) mRNA.                                                |
| sd34300.16.8 59-S  | 1.00             | 1.05           | 1.06            | 0.94               | 0.88             | 1.13              | -0.10            | -0.26          | 0.10            | Kars          | NM_053092.1 | Mus musculus lysyl-tRNA synthetase (Kars) mRNA.                                                              |
| sd34300.23.1 25-S  | 0.87             | 1.13           | 1.30            | 0.80               | 0.91             | 1.39              | -0.11            | -0.31          | 0.11            | Sf3b3         | NM_133935.1 |                                                                                                              |
| sd34359.7 30-S     | 0.85             | 1.08           | 1.22            | 0.86               | 0.85             | 1.37              | -0.13            | -0.13          | 0.08            | Psmf7         | NM_018173.1 | Mus musculus proteasome (prosome macropain) 26S subunit non-ATPase 7 (Psmf7) mRNA.                           |
| sd34521.8.1 20-S   | 0.95             | 1.06           | 1.24            | 0.78               | 0.97             | 1.29              | -0.27            | -0.28          | 0.06            | BC004022      | XM_134557.2 | Mus musculus cDNA sequence BC004022 (BC004022) mRNA.                                                         |
| sd34532.9 187-S    | 0.89             | 1.11           | 1.19            | 0.79               | 0.89             | 1.14              | -0.18            | -0.32          | -0.04           | Dnaa2         | NM_019794.1 | Mus musculus Dnal (Hsp40) homolog subfamily A member 2 (Dnaa2) mRNA.                                         |
| sd34546.7.1 7-S    | 0.90             | 1.10           | 1.32            | 0.75               | 0.90             | 1.39              | -0.26            | -0.28          | 0.07            | Asna1         | NM_019652   | Mus musculus arsA (bacterial) arsenite transporter ATP-binding homolog 1 (Asna1) mRNA.                       |
| sd34595.13 308-S   | 0.74             | 1.06           | 1.25            | 0.65               | 0.89             | 1.34              | -0.19            | -0.26          | 0.11            | Gab1          | NM_021356.2 | Mus musculus growth factor receptor bound protein 2-associated protein 1 (Gab1) mRNA.                        |
| sd34621.8 577-S    | 1.07             | 0.93           | 1.07            | 0.92               | 0.71             | 1.04              | -0.21            | -0.39          | -0.04           | Ednra         | NM_010332.1 | Mus musculus endothelin receptor type A (Ednra) mRNA.                                                        |
| sd34623.10 30-S    | 1.05             | 1.00           | 1.23            | 0.89               | 0.88             | 1.08              | -0.23            | -0.19          | -0.19           | Tmem34        | NM_145599.2 |                                                                                                              |
| sd34640.17 455-S   | 1.09             | 1.05           | 1.19            | 0.93               | 0.79             | 1.04              | -0.23            | -0.40          | 0.19            | Large         | NM_010681.1 | Mus musculus like-glycyltransferase (Large) mRNA.                                                            |
| sd34655.25.1 28-S  | 0.94             | 1.09           | 1.22            | 0.81               | 0.88             | 1.17              | -0.22            | -0.31          | -0.08           | Eps15-rs      | NM_007944.1 | Mus musculus epidermal growth factor receptor pathway substrate 15 related sequence (Eps15-rs) mRNA.         |
| sd34673.5.1 43-S   | 1.02             | 0.90           | 1.21            | 0.80               | 0.72             | 1.31              | -0.18            | -0.32          | 0.11            | Bat2          | NM_198095.1 |                                                                                                              |
| sd34694.5.9 23-S   | 0.89             | 1.07           | 1.13            | 0.81               | 0.83             | 1.32              | -0.13            | -0.36          | 0.23            | BC051227      | NM_183170.1 | Mus musculus cDNA sequence BC051227 (BC051227) mRNA.                                                         |
| sd34701.2.1 7-S    | 0.86             | 1.13           | 1.25            | 0.78               | 0.88             | 1.16              | -0.13            | -0.37          | -0.11           | 281042815Rik  | XM_147329.1 | Mus musculus RIKEN cDNA 281042815 gene (281042815Rik) mRNA.                                                  |
| sd34717.16 531-S   | 0.95             | 1.08           | 1.15            | 0.88               | 0.96             | 1.35              | -0.12            | -0.18          | 0.23            | BC031407      | NM_145596.2 | Mus musculus cDNA sequence BC031407 (BC031407) mRNA.                                                         |
| sd34795.4.1 9-S    | 0.82             | 1.04           | 1.16            | 0.72               | 0.97             | 1.44              | -0.07            | -0.09          | 0.31            | Sap30         | NM_021788.1 | Mus musculus sin3 associated polypeptide (Sap30) mRNA.                                                       |
| sd34935.10.1 29-S  | 0.96             | 1.08           | 1.22            | 0.83               | 0.93             | 1.20              | -0.15            | -0.21          | -0.01           | Dcm6          | NM_017222.1 | Mus musculus dynactin 6 (Dcm6) mRNA.                                                                         |
| sd34935.12 29-S    | 0.97             | 1.13           | 1.26            | 0.86               | 0.91             | 1.26              | -0.11            | -0.26          | 0.11            | Prpf11        | NM_026692.2 | Mus musculus leprein receptor overlapping transcript-like 1 (Lprpt1) mRNA.                                   |
| sd34969.6.1 9-S    | 1.00             | 0.93           | 1.08            | 0.88               | 1.03             | 1.29              | -0.18            | 0.15           | 0.27            | 2600016B03Rik | NM_026453.1 | Mus musculus RIKEN cDNA 2600016B03 gene (2600016B03Rik) mRNA.                                                |
| sd35003.22 120-S   | 0.98             | 0.99           | 1.39            | 0.82               | 0.81             | 1.28              | -0.27            | -0.29          | -0.12           | Adam9         | NM_007404.1 | Mus musculus a disintegrin and metalloproteinase domain 9 (meltrin gamma) (Adam9) mRNA.                      |
| sd35013.8.1 0-S    | 0.69             | 1.03           | 1.12            |                    |                  |                   |                  |                |                 |               |             |                                                                                                              |

| Gene Name           | Control 18 Hours | Control 1 Week | Control 4 Weeks | Treatment 18 Hours | Treatment 1 Week | Treatment 4 Weeks | Log2 FC 18 Hours | Log2 FC 1 Week | Log2 FC 4 Weeks | Symbol         | Accession   | Definition                                                                                                     |
|---------------------|------------------|----------------|-----------------|--------------------|------------------|-------------------|------------------|----------------|-----------------|----------------|-------------|----------------------------------------------------------------------------------------------------------------|
| scd36050.5.8.18-S   | 0.95             | 1.07           | 1.33            | 0.82               | 0.97             | 1.66              | -0.23            | -0.15          | 0.32            | 1700001E16Rik  | NM_027030.1 | Mus musculus RIKEN cDNA 1700001E16 gene (1700001E16Rik) mRNA.                                                  |
| scd36067.18.4-S     | 0.91             | 1.06           | 1.26            | 0.80               | 0.95             | 1.31              | -0.19            | -0.16          | 0.06            | Aplp2          | NM_009691.1 | Mus musculus amyloid beta (A4) precursor-like protein 2 (Aplp2) mRNA.                                          |
| scd36150.5.156-S    | 0.94             | 1.05           | 1.24            | 0.84               | 0.88             | 1.31              | -0.16            | -0.25          | 0.09            | Keap1          | NM_016679.2 | Mus musculus kelch-like ECH-associated protein 1 (Keap1) mRNA.                                                 |
| scd36203.8.1.30-S   | 1.09             | 0.87           | 1.19            | 0.89               | 0.81             | 1.03              | -0.29            | -0.51          | -0.20           | 4931406C07Rik  | NM_133732.1 | Mus musculus RIKEN cDNA 4931406C07 gene (4931406C07Rik) mRNA.                                                  |
| scd36214.3.384-S    | 0.93             | 1.04           | 1.09            | 0.73               | 0.89             | 1.27              | -0.04            | -0.08          | 0.23            | Gst            | NM_036832.2 | Mus musculus globulin inducible factor lethal (Gst) mRNA.                                                      |
| scd36291.19.1.13-S  | 0.93             | 1.02           | 1.15            | 0.79               | 0.97             | 1.28              | -0.25            | -0.06          | 0.15            | Lars2          | NM_153188.1 | Mus musculus leucyl-tRNA synthetase mitochondrial (Lars2) mRNA.                                                |
| scd36296.9.19.70-S  | 0.90             | 1.04           | 1.25            | 0.83               | 0.99             | 1.58              | -0.11            | -0.08          | 0.36            | Exosc7         | XM_284543.2 |                                                                                                                |
| scd36309.11.147-S   | 0.78             | 1.05           | 1.12            | 0.66               | 0.99             | 1.25              | -0.25            | -0.08          | 0.17            | Abhd5          | NM_026179.1 | Mus musculus abhydrolase domain containing 5 (Abhd5) mRNA.                                                     |
| scd36332.17.16-S    | 1.02             | 1.00           | 1.29            | 0.85               | 0.81             | 1.23              | -0.26            | -0.30          | -0.07           | Catnb          | NM_007614.2 | Mus musculus catenin beta (Catnb) mRNA.                                                                        |
| scd36337.4.1.30-S   | 0.86             | 1.07           | 1.32            | 0.78               | 0.92             | 1.49              | -0.14            | -0.22          | 0.18            | 15000010M16Rik | NM_026992.1 | Mus musculus RIKEN cDNA 15000010M16 gene (15000010M16Rik) mRNA.                                                |
| scd36342.8.1.2-S    | 0.56             | 1.04           | 1.15            | 0.50               | 1.01             | 1.49              | -0.19            | -0.04          | 0.37            | BC010801       | NM_144793.1 | Mus musculus cDNA sequence BC010801 (BC010801) mRNA.                                                           |
| scd36346.20.410-S   | 0.86             | 1.08           | 1.28            | 0.73               | 0.91             | 1.29              | -0.24            | -0.24          | 0.03            | 8430408H12Rik  | NM_033683.3 | Mus musculus RIKEN cDNA 8430408H12 gene (8430408H12Rik) mRNA.                                                  |
| scd36347.8.506-S    | 0.98             | 0.98           | 0.99            | 0.82               | 1.00             | 1.12              | -0.25            | 0.03           | 0.19            | Endog1p        | NM_172456.1 | Mus musculus endonuclease G-like 1 (Endog1p) mRNA.                                                             |
| scd36472.2.242.20-S | 0.89             | 1.02           | 1.35            | 0.80               | 0.94             | 1.56              | -0.16            | -0.11          | 0.20            | Gpx1           | NM_008160.1 | Mus musculus glutathione peroxidase 1 (Gpx1) mRNA.                                                             |
| scd36492.10.1.4-S   | 0.65             | 1.02           | 1.12            | 0.62               | 0.99             | 1.47              | -0.07            | -0.05          | 0.39            | Irfid2         | NM_025903.1 | Mus musculus interferon-related developmental regulator 2 (Irfid2) mRNA.                                       |
| scd36493.4.1-S      | 0.82             | 1.07           | 1.14            | 0.89               | 0.92             | 1.17              | 0.13             | -0.23          | 0.04            | Tusc2          | NM_019742.2 | Mus musculus tumor suppressor candidate 2 (Tusc2) mRNA.                                                        |
| scd36525.10.1.12-S  | 0.98             | 1.04           | 1.35            | 0.85               | 0.97             | 1.50              | -0.20            | -0.10          | 0.15            | Mrp3           | NM_053159.2 | Mus musculus mitochondrial ribosomal protein L3 (Mrp3) mRNA.                                                   |
| scd36548.17.86-S    | 0.73             | 0.98           | 1.18            | 0.62               | 0.96             | 1.59              | -0.25            | -0.03          | 0.44            | Ryk            | NM_013649.2 | Mus musculus receptor-like tyrosine kinase (Ryk) mRNA.                                                         |
| scd36570.3.1.64-S   | 0.81             | 1.08           | 1.30            | 0.74               | 0.95             | 1.41              | -0.13            | -0.17          | 0.12            | Dbr1           | NM_031403.1 | Mus musculus debranching enzyme homolog 1 (S. cerevisiae) (Dbr1) mRNA.                                         |
| scd36580.22.1.188-S | 0.96             | 1.03           | 1.22            | 0.91               | 0.89             | 1.30              | -0.07            | -0.22          | 0.10            | Cxpb2          | NM_015827.1 | Mus musculus coatomer protein complex subunit beta 2 (beta prime) (Cxpb2) mRNA.                                |
| scd36582.7.1.25-S   | 1.10             | 1.04           | 1.03            | 0.93               | 0.84             | 0.99              | -0.23            | -0.32          | -0.06           | Rbp1           | NM_011254.2 | Mus musculus retinol binding protein 1 cellular (Rbp1) mRNA.                                                   |
| scd36607.9.1.1-S    | 1.17             | 0.84           | 1.10            | 0.95               | 0.62             | 0.91              | -0.33            | -0.42          | -0.29           | Pcolae2        | NM_029620.1 | Mus musculus procollagen C-endopeptidase enhancer 2 (Pcolae2) mRNA.                                            |
| scd36620.9.485-S    | 0.87             | 1.11           | 1.25            | 0.76               | 0.93             | 1.32              | -0.18            | -0.25          | 0.09            | Piscr4         | NM_178711.2 | Mus musculus phospholipid scramblase 4 (Piscr4) mRNA.                                                          |
| scd36640.8.209-S    | 0.94             | 1.09           | 1.17            | 0.94               | 0.87             | 1.20              | -0.01            | -0.33          | 0.03            | Ni5e           | NM_011851.2 | Mus musculus 5 nucleotidase (Ni5e) mRNA.                                                                       |
| scd36684.10.99-S    | 0.94             | 1.07           | 1.29            | 0.81               | 0.84             | 1.38              | -0.20            | -0.33          | 0.10            | EloV5          | NM_134255.2 | Mus musculus ELOVL family member 5 elongation of long chain fatty acids (yeast) (EloV5) mRNA.                  |
| scd36701.41.34-S    | 0.99             | 0.91           | 1.08            | 0.89               | 0.92             | 1.03              | -0.15            | -0.14          | -0.12           | Myo5a          | NM_039141.1 | Mus musculus myosin Va (Myo5a) mRNA.                                                                           |
| scd36702.4.469-S    | 0.85             | 1.10           | 1.20            | 0.73               | 0.99             | 1.19              | -0.23            | -0.24          | -0.23           | Arpp19         | NM_021548.2 | Mus musculus cAMP-regulated phosphoprotein 19 (Arpp19) mRNA.                                                   |
| scd36733.11.1.17-S  | 0.66             | 0.96           | 1.02            | 0.56               | 1.08             | 1.56              | -0.25            | -0.18          | 0.61            | Mns1           | NM_008613.1 | Mus musculus meiosis-specific nuclear structural protein 1 (Mns1) mRNA.                                        |
| scd36793.6.1.16-S   | 1.02             | 1.08           | 1.09            | 0.96               | 0.80             | 0.99              | -0.09            | -0.42          | -0.13           | Ppb            | NM_011149.1 | Mus musculus peptidylprolyl isomerase B (Ppb) mRNA.                                                            |
| scd36799.4.9-S      | 0.78             | 0.94           | 1.02            | 0.72               | 1.02             | 1.23              | -0.11            | 0.13           | -0.28           | 2810417H13Rik  | NM_026515.1 | Mus musculus RIKEN cDNA 2810417H13 gene (2810417H13Rik) mRNA.                                                  |
| scd36804.10.1.24-S  | 0.96             | 1.09           | 1.47            | 0.91               | 0.87             | 1.53              | -0.09            | -0.32          | 0.06            | Spg21          | NM_138584.1 |                                                                                                                |
| scd36809.14.1.41-S  | 0.97             | 1.03           | 1.13            | 0.86               | 0.89             | 1.23              | -0.19            | -0.21          | 0.31            | Cipx           | NM_011802.1 | Mus musculus caseinolytic protease X (E.coli) (Cipx) mRNA.                                                     |
| scd36817.19.228-S   | 0.99             | 1.07           | 1.26            | 0.87               | 0.86             | 1.22              | -0.09            | -0.16          | -0.05           | Dpp8           | NM_029592.2 | Mus musculus dipeptidylpeptidase 8 (Dpp8) mRNA.                                                                |
| scd36820.13.122-S   | 0.96             | 1.00           | 1.21            | 0.81               | 0.90             | 1.13              | -0.29            | -0.17          | -0.09           | 210321M09Rik   | NM_033683.3 | Mus musculus RIKEN cDNA 210321M09 gene (210321M09Rik) mRNA.                                                    |
| scd36834.13.1.20-S  | 0.96             | 1.14           | 1.18            | 0.87               | 0.87             | 1.09              | -0.14            | -0.38          | -0.12           | 2300004C15Rik  | XM_147000.1 | Mus musculus RIKEN cDNA 2300004C15 gene (2300004C15Rik) mRNA.                                                  |
| scd36898.4.1.120-S  | 1.04             | 1.08           | 1.19            | 0.93               | 0.93             | 1.08              | -0.16            | -0.22          | -0.14           | 2310046O06Rik  | NM_175273.2 | Mus musculus RIKEN cDNA 2310046O06 gene (2310046O06Rik) mRNA.                                                  |
| scd36902.11.284-S   | 1.03             | 1.06           | 1.21            | 0.96               | 0.85             | 1.18              | -0.09            | -0.32          | -0.02           | Scamp2         | NM_022813.2 | Mus musculus secretory carrier membrane protein 2 (Scamp2) mRNA.                                               |
| scd36912.14.1-S     | 1.00             | 0.97           | 1.25            | 0.85               | 0.73             | 1.12              | -0.23            | -0.41          | -0.16           | Pipn9          | NM_019651   | Mus musculus protein tyrosine phosphatase non-receptor type 9 (Pipn9) mRNA.                                    |
| scd36968.16.1.28-S  | 0.91             | 0.98           | 1.09            | 0.89               | 0.98             | 1.16              | -0.17            | 0.00           | 0.09            | Dtd1           | NM_133981.1 | Mus musculus disrupted in bipolar disorder 1 homolog (human) (Dtd1) mRNA.                                      |
| scd36998.11.1.89-S  | 0.97             | 1.13           | 1.19            | 0.92               | 0.90             | 1.26              | -0.07            | -0.32          | -0.08           | D03060M11Rik   | NM_148100.1 | Mus musculus RIKEN cDNA D03060M11 gene (D03060M11Rik) mRNA.                                                    |
| scd37112.9.269-S    | 1.01             | 1.07           | 1.12            | 0.93               | 0.75             | 1.10              | -0.12            | -0.45          | -0.10           | Ecam1          | NM_027102.1 | Mus musculus endothelial cell-specific adhesion molecule (Ecam1) mRNA.                                         |
| scd37199.27.1.42-S  | 0.99             | 1.05           | 1.28            | 0.88               | 0.83             | 1.15              | -0.17            | -0.35          | -0.15           | E13010317Rik   | NM_018136.3 | Mus musculus RIKEN cDNA E13010317 gene (E13010317Rik) mRNA.                                                    |
| scd37236.8.286-S    | 1.27             | 0.93           | 1.13            | 0.95               | 0.65             | 0.97              | -0.44            | -0.51          | -0.21           | Icam1          | NM_010493.2 | Mus musculus intercellular adhesion molecule (Icam1) mRNA.                                                     |
| scd37264.5.1.20-S   | 1.03             | 0.93           | 1.10            | 0.92               | 0.74             | 1.22              | -0.15            | -0.32          | 0.15            | BC017612       | XM_147333.1 |                                                                                                                |
| scd37393.11.210-S   | 0.76             | 1.08           | 1.26            | 0.69               | 0.92             | 1.38              | -0.18            | -0.23          | 0.15            | Pip5k2c        | NM_054097.2 | Mus musculus phosphatidylinositol 4-phosphate 5-kinase type II gamma (Pip5k2c) mRNA.                           |
| scd37402.3.73-S     | 1.09             | 0.95           | 1.11            | 0.89               | 0.84             | 1.22              | -0.29            | -0.17          | 0.14            | Sas            | NM_025982   | Mus musculus sarcoma amplified sequence (Sas) mRNA.                                                            |
| scd37403.6.1.51-S   | 0.96             | 1.02           | 1.40            | 0.80               | 0.91             | 1.50              | -0.26            | -0.17          | 0.11            | 2310050B20Rik  | NM_025537.2 | Mus musculus RIKEN cDNA 2310050B20 gene (2310050B20Rik) mRNA.                                                  |
| scd37447.1.29.151-S | 0.92             | 1.09           | 1.28            | 0.81               | 0.81             | 1.32              | -0.17            | -0.32          | -0.17           | Gltar2         | NM_025982   | Mus musculus GLUT4-related protein 2 (glutamate) (Gltar2) mRNA.                                                |
| scd37617.5.6-S      | 0.97             | 1.09           | 1.28            | 0.87               | 0.83             | 1.53              | -0.16            | -0.39          | 0.25            | Slc25a3        | NM_133668.2 | Mus musculus solute carrier family 25 (mitochondrial carrier, phosphate carrier) member 3 (Slc25a3) mRNA.      |
| scd37625.11.1.3-S   | 0.96             | 1.03           | 1.18            | 0.79               | 0.83             | 1.12              | -0.27            | -0.31          | -0.06           | Acr6           | NM_025914.1 | Mus musculus ARPE actin-related protein 6 homolog (yeast) (Acr6) mRNA.                                         |
| scd37626.20.1.66-S  | 0.97             | 1.02           | 1.18            | 0.81               | 0.88             | 1.09              | -0.26            | -0.21          | -0.10           | D10Ertd802a    | NM_198021.1 | Mus musculus DNA segment Chr 10 ERATO D01802 expressed (D10Ertd802a) mRNA.                                     |
| scd37649.7.307-S    | 1.31             | 0.99           | 1.06            | 1.06               | 0.66             | 1.00              | -0.33            | -0.58          | -0.08           | 1200002N14Rik  | NM_027878.1 | Mus musculus RIKEN cDNA 1200002N14 gene (1200002N14Rik) mRNA.                                                  |
| scd37666.12.1.12-S  | 0.93             | 1.11           | 1.35            | 0.91               | 0.81             | 1.36              | -0.03            | -0.46          | 0.01            | D10Wsu52e      | NM_145422.1 | Mus musculus DNA segment Chr 10 Wayne State University 52 expressed (D10Wsu52e) mRNA.                          |
| scd37691.7.29.82-S  | 1.04             | 0.97           | 1.12            | 0.90               | 0.90             | 1.32              | -0.21            | -0.11          | 0.23            | Gna15          | NM_010394.3 | Mus musculus guanine nucleotide binding protein alpha 15 (Gna15) mRNA.                                         |
| scd37704.3.1.30-S   | 0.95             | 0.98           | 1.13            | 0.85               | 0.88             | 1.35              | -0.20            | -0.38          | 0.02            | Mpr54          | NM_025151.1 | Mus musculus mitochondrial ribosomal protein L54 (Mpr54) mRNA.                                                 |
| scd37708.10.1.39-S  | 0.89             | 1.14           | 1.17            | 0.84               | 0.84             | 1.10              | -0.09            | -0.43          | -0.09           | Pla2           | NM_021501.1 |                                                                                                                |
| scd37743.3.1.54-S   | 0.95             | 1.07           | 1.30            | 0.90               | 0.85             | 1.34              | -0.07            | -0.33          | 0.05            | Polr2e         | XM_282920.1 | Mus musculus polymerase (RNA) II (DNA directed) polypeptide E (Polr2e) mRNA.                                   |
| scd37776.6.58-S     | 0.92             | 1.08           | 1.19            | 0.83               | 0.86             | 1.14              | -0.15            | -0.33          | -0.06           | D10Jhu81e      | NM_138601.1 | Mus musculus DNA segment Chr 10 Johns Hopkins University 81 expressed (D10Jhu81e) mRNA.                        |
| scd37784.7.145-S    | 0.94             | 1.04           | 1.19            | 0.83               | 0.81             | 1.21              | -0.18            | -0.37          | 0.03            | 1810008A18Rik  | NM_133998.1 | Mus musculus RIKEN cDNA 1810008A18 gene (1810008A18Rik) mRNA.                                                  |
| scd37787.43.431-S   | 1.17             | 1.06           | 1.09            | 0.94               | 0.81             | 1.06              | -0.32            | -0.37          | -0.05           | Col18a1        | NM_009929.2 | Mus musculus procollagen type XVIII alpha 1 (Col18a1) mRNA.                                                    |
| scd37796.6.295-S    | 1.30             | 1.04           | 0.98            | 1.08               | 0.85             | 0.95              | -0.27            | -0.30          | -0.05           | Col6a1         | NM_009933.1 | Mus musculus procollagen type VI alpha 1 (Col6a1) mRNA.                                                        |
| scd37807.8.1.23-S   | 0.91             | 1.00           | 1.23            | 0.81               | 0.81             | 1.38              | -0.19            | -0.13          | 0.19            | Smarc1         | NM_014818.1 | Mus musculus SMAR1-related nuclear matrix dependent regulator of chromatin subfamily b member 1 (Smarc1) mRNA. |
| scd37827.3.399-S    | 0.95             | 1.00           | 1.07            | 0.87               | 1.00             | 1.20              | -0.13            | 0.00           | -0.17           | D10Ertd214e    | NM_134007.2 | Mus musculus DNA segment Chr 10 ERATO D01214 expressed (D10Ertd214e) mRNA.                                     |
| scd37833.23.1.1-S   | 1.08             | 0.94           | 1.11            | 0.96               | 0.74             | 0.97              | -0.18            | -0.32          | -0.19           | Bicc1          | NM_031397.1 | Mus musculus bicucullar C homolog 1 (Drosophila) (Bicc1) mRNA.                                                 |
| scd37865.9.4-S      | 1.02             | 0.97           | 1.19            | 0.82               | 0.78             | 1.11              | -0.33            | -0.30          | -0.11           | D10Uclat1      | NM_178606.2 | Mus musculus DNA segment Chr 10 University of California at Los Angeles 1 (D10Uclat1) mRNA.                    |
| scd37876.12.7-S     | 0.62             | 1.08           | 1.23            | 0.58               | 0.97             | 1.44              | -0.11            | -0.15          | 0.23            | Sirt1          | NM_019812.1 | Mus musculus sirtuin 1 ((silent mating type information regulation 2 homolog) 1 (S. cerevisiae) (Sirt1) mRNA.  |
| scd37892.17.17.22-S | 0.91             | 1.15           | 1.25            | 0.86               | 0.83             | 1.38              | -0.07            | -0.47          | 0.14            | Ddx50          | NM_053183.1 | Mus musculus DEAD (Asp-Glu-Ala-Asp) box polypeptide 50 (Ddx50) mRNA.                                           |
| scd37899.10.160-S   | 0.96             | 1.08           | 1.24            | 0.81               | 0.81             | 1.15              | -0.25            | -0.41          | -0.09           | Vps26          | NM_133672   | Mus musculus vacuolar protein sorting 26 (yeast) (Vps26) mRNA.                                                 |
| scd37933.4.401-S    | 0.93             | 1.08           | 1.34            | 0.85               | 0.88             | 1.35              | -0.13            | -0.40          | 0.02            | D10Ertd641e    | NM_025141.1 | Mus musculus DNA segment Chr 10 ERATO D01641 expressed (D10Ertd641e) mRNA.                                     |
| scd38001.5.1.73-S   | 0.99             | 1.04           | 1.10            | 0.92               | 0.86             | 1.26              | -0.11            | -0.29          | 0.21            | 1700021F05Rik  | NM_026411.1 | Mus musculus RIKEN cDNA 1700021F05 gene (1700021F05Rik) mRNA.                                                  |
| scd38058.2.1.88-S   | 0.94             | 1.17           | 1.56            | 0.80               | 0.76             | 1.43              | -0.23            | -0.61          | -0.12           | A630077B13Rik  | NM_175449.3 | Mus musculus RIKEN cDNA A630077B13 gene (A630077B13Rik) mRNA.                                                  |
| scd38117.23.1.41-S  | 0.97             | 1.00           | 1.30            | 0.96               | 0.78             | 1.33              | -0.01            | -0.37          | 0.03            | Enpp1          | NM_008813.2 | Mus musculus ectoronucleotide pyrophosphatase/phosphodiesterase 1 (Enpp1) mRNA.                                |
| scd38135.15.73-S    | 1.29             | 1.10           | 1.32            | 0.92               | 0.90             | 0.99              | -0.46            | -0.30          | -0.44           | Myb            | NM_010848.2 | Mus musculus myeloblastosis oncogene (Myb) mRNA.                                                               |
| scd38150.2.1.277-S  | 1.16             | 1.20           | 1.07            | 1.00               | 0.88             | 0.95              | -0.21            | -0.42          | -0.17           | Slc35d3        | XM_125515.3 |                                                                                                                |
| scd38210.4.147-S    | 0.99             | 1.07           | 1.20            | 0.85               | 0.79             | 1.09              | -0.22            | -0.42          | -0.14           | Rab32          | NM_026405.2 | Mus musculus RAB32 member RAS oncogene family (Rab32) mRNA.                                                    |
| scd38222.21.67-S    | 0.26             | 0.93           | 1.21            | 0.95               | 0.88             | 0.92              | -0.42            | -0.42          | -0.40           | Gstb1          | NM_175153.3 |                                                                                                                |
| scd38242.7.1.214-S  | 0.84             | 1.13           | 1.21            | 0.71               | 0.93             | 1.27              | -0.24            | -0.27          | 0.01            | Mtrf11         | NM_172714.2 |                                                                                                                |
| scd38324.4.1.0-S    | 0.90             | 0.97           | 1.08            | 0.75               | 0.97             | 1.43              | -0.28            | -0.01          | 0.40            | Ddl3           | NM_007837.2 | Mus musculus DNA                                                                                               |

| Gene Name             | Control 18 Hours | Control 1 Week | Control 4 Weeks | Treatment 18 Hours | Treatment 1 Week | Treatment 4 Weeks | Log2 FC 18 Hours | Log2 FC 1 Week | Log2 FC 4 Weeks | Symbol        | Accession   | Definition                                                                                                         |
|-----------------------|------------------|----------------|-----------------|--------------------|------------------|-------------------|------------------|----------------|-----------------|---------------|-------------|--------------------------------------------------------------------------------------------------------------------|
| scd38922.4.219-S      | 0.87             | 1.05           | 1.01            | 0.78               | 1.07             | 1.21              | -0.16            | 0.02           | 0.26            | Asf1a         | NM_025541.2 | Mus musculus ASF1 anti-silencing function 1 homolog A (S. cerevisiae) (Asf1a) mRNA.                                |
| scd38942.8.1-3-S      | 0.91             | 0.97           | 1.24            | 0.75               | 1.01             | 1.42              | -0.28            | 0.05           | 0.20            | B630009i04Rik | XM_125617.3 |                                                                                                                    |
| scd38974.6.243-S      | 0.91             | 1.14           | 1.35            | 0.84               | 0.80             | 1.44              | -0.13            | -0.51          | 0.10            | Ostm1         | NM_172416.2 | Mus musculus osteopontin associated transmembrane protein 1 (Ostm1) mRNA.                                          |
| scd38985.8.420-S      | 0.99             | 1.11           | 1.36            | 0.89               | 0.86             | 1.30              | -0.15            | -0.36          | -0.07           | Cdtk1         | NM_016989.1 | Mus musculus CD164 antigen (Cdtk1) mRNA.                                                                           |
| scd39055.17.337-S     | 0.96             | 1.09           | 1.15            | 0.83               | 0.84             | 1.00              | -0.23            | -0.48          | -0.15           | Arhgap18      | NM_173637.1 | Mus musculus Rho GTPase activating protein 18 (Arhgap18) mRNA.                                                     |
| scd39079.4.283-S      | 0.76             | 1.28           | 1.29            | 0.85               | 0.66             | 1.33              | 0.11             | -0.91          | 0.04            | Ctgf          | NM_010217   | Mus musculus connective tissue growth factor (Ctgf) mRNA.                                                          |
| scd39224.5.1-30-S     | 0.98             | 1.00           | 1.12            | 0.98               | 0.84             | 1.09              | 0.01             | -0.25          | -0.03           | Stra13        | NM_016665.1 | Mus musculus stimulated by retinoic acid 13 (Stra13) mRNA.                                                         |
| scd39237.2.0-S        | 0.95             | 1.06           | 1.14            | 0.81               | 0.85             | 1.33              | -0.23            | -0.33          | 0.23            | 2600005N12Rik | NM_197995.1 | Mus musculus RIKEN cDNA 2600005N12 gene (2600005N12Rik) mRNA.                                                      |
| scd39273.6.263-S      | 1.02             | 0.88           | 1.09            | 0.89               | 0.57             | 1.13              | -0.21            | -0.64          | 0.06            | Lgals3bp      | NM_011150.1 | Mus musculus lectin galactoside-binding soluble 3 binding protein (Lgals3bp) mRNA.                                 |
| scd39292.4.1-46-S     | 0.87             | 1.04           | 1.22            | 0.71               | 0.90             | 1.46              | -0.29            | -0.22          | 0.27            | Ptdsr         | NM_033398.1 | Mus musculus phosphatidylserine receptor (Ptdsr) mRNA.                                                             |
| scd39322.7.11-5-S     | 1.14             | 1.07           | 1.05            | 1.01               | 0.83             | 0.97              | -0.17            | -0.35          | -0.11           | Cdkk1         | NM_016905.1 | Mus musculus galactokinase 1 (Cdkk1) mRNA.                                                                         |
| scd393363.3.4-5-S     | 0.98             | 1.09           | 1.15            | 0.83               | 0.84             | 1.08              | -0.19            | -0.19          | 0.10            | Nbsf          | NM_025313.1 | Mus musculus 53 kDa nucleotide cytosolic (Nbsf) mRNA.                                                              |
| scd39383.39.205-S     | 0.98             | 1.18           | 1.22            | 0.83               | 0.81             | 1.09              | -0.24            | -0.53          | -0.16           | Abca9         | NM_147220.1 | Mus musculus ATP-binding cassette transporter sub-family A member 9 (Abca9) mRNA.                                  |
| scd39472.24.150-S     | 1.07             | 0.98           | 1.37            | 0.88               | 0.86             | 1.32              | -0.28            | -0.18          | -0.05           | Nsf           | NM_008740.2 | Mus musculus N-ethylmaleimide sensitive fusion protein (Nsf) mRNA.                                                 |
| scd39475.6.48-S       | 0.93             | 1.11           | 1.22            | 0.91               | 0.96             | 1.33              | -0.03            | -0.19          | 0.13            | Gosr2         | NM_019650.2 | Mus musculus golgi SNAP receptor complex member 2 (Gosr2) mRNA.                                                    |
| scd39617.28.1-49-S    | 0.95             | 1.07           | 1.16            | 0.81               | 0.93             | 1.24              | -0.24            | -0.21          | 0.10            | Thrap4        | NM_011869.1 | Mus musculus thyroid hormone receptor associated protein 4 (Thrap4) mRNA.                                          |
| scd39620.4.46-S       | 0.97             | 1.07           | 1.23            | 0.89               | 0.86             | 1.37              | -0.12            | -0.31          | 0.16            | 1810046J19Rik | NM_025559.1 | Mus musculus RIKEN cDNA 1810046J19 gene (1810046J19Rik) mRNA.                                                      |
| scd39638.1.1-92-S     | 1.02             | 1.05           | 1.13            | 0.76               | 0.89             | 1.35              | -0.42            | -0.23          | 0.26            | Rp23          | NM_022891.1 | Mus musculus ribosomal protein L23 (Rp23) mRNA.                                                                    |
| scd39652.33.1693-24-S | 0.87             | 1.03           | 1.25            | 0.73               | 0.99             | 1.39              | -0.25            | -0.04          | 0.15            | Kpnb1         | NM_008379.2 | Mus musculus karyopherin (importin) beta 1 (Kpnb1) mRNA.                                                           |
| scd39788.24.563-S     | 0.81             | 1.01           | 1.08            | 0.68               | 0.99             | 1.23              | -0.27            | -0.04          | 0.20            | Brip1         | NM_178309.1 | Mus musculus BRCA1 interacting protein C-terminal helicase 1 (Brip1) mRNA.                                         |
| scd39808.15.1-10-S    | 0.98             | 1.07           | 1.23            | 0.92               | 0.84             | 1.26              | -0.09            | -0.33          | 0.05            | Aafl          | NM_019816.1 | Mus musculus apoptosis antagonizing transcription factor (Aafl) mRNA.                                              |
| scd39810.17.1-7-S     | 0.96             | 0.98           | 1.16            | 0.98               | 0.98             | 1.26              | 0.03             | 0.00           | 0.13            | Tada2l        | NM_172562   | Mus musculus transcriptional adaptor 2 (ADA2 homolog yeast)-like (Tada2l) mRNA.                                    |
| scd39853.10.345-S     | 0.98             | 1.15           | 1.08            | 0.86               | 0.89             | 1.06              | -0.19            | -0.37          | -0.03           | 5730455P16Rik | XM_126361.2 | Mus musculus RIKEN cDNA 5730455P16 gene (5730455P16Rik) mRNA.                                                      |
| scd39869.11.25-S      | 0.96             | 1.08           | 1.29            | 0.74               | 0.78             | 1.10              | -0.39            | -0.47          | -0.23           | Wab1          | NM_019653.2 | Mus musculus WD repeat and SOCS box-containing 1 (Wab1) mRNA.                                                      |
| scd39873.10.1-46-S    | 1.09             | 0.94           | 1.38            | 0.95               | 0.78             | 1.39              | -0.20            | -0.27          | 0.00            | Lgals9        | NM_010708.1 | Mus musculus lectin galactoside binding soluble 9 (Lgals9) mRNA.                                                   |
| scd39891.17.182-S     | 1.06             | 0.89           | 1.15            | 0.85               | 0.78             | 1.39              | -0.11            | -0.33          | -0.04           | Tnfrap1       | NM_009392.2 | Mus musculus tumor necrosis factor alpha-induced protein 1 (endothelial) (Tnfrap1) mRNA.                           |
| scd39937.19.289-S     | 0.75             | 1.18           | 1.09            | 0.70               | 0.97             | 1.34              | -0.14            | -0.10          | 0.14            | Rplp1         | NM_026531.1 | Mus musculus ribosomal protein L1 (Rplp1) mRNA.                                                                    |
| scd39960.2.268-S      | 0.93             | 1.00           | 1.23            | 0.77               | 0.93             | 1.39              | -0.26            | -0.10          | 0.18            | 0610009E20Rik | NM_025318.1 | Mus musculus RIKEN cDNA 0610009E20 gene (0610009E20Rik) mRNA.                                                      |
| scd39973.20.1-51-S    | 0.90             | 1.05           | 1.11            | 0.92               | 0.86             | 1.11              | -0.12            | -0.27          | 0.01            | 4933427D14Rik | NM_028963.1 | Mus musculus RIKEN cDNA 4933427D14 gene (4933427D14Rik) mRNA.                                                      |
| scd39983.12.1-110-S   | 1.00             | 1.05           | 1.27            | 0.74               | 0.89             | 1.16              | -0.29            | -0.24          | -0.12           | Nup88         | NM_172394.1 | Mus musculus nucleoporin 88 (Nup88) mRNA.                                                                          |
| scd39988.9.1-13-S     | 1.05             | 1.03           | 1.19            | 0.91               | 0.84             | 1.09              | -0.20            | -0.29          | -0.13           | Slc25a11      | NM_024211.2 | Mus musculus solute carrier family 25 (mitochondrial carrier; oxoglutarate carrier) member 11 (Slc25a11) mRNA.     |
| scd40004.19.1-140-S   | 0.87             | 1.13           | 1.15            | 0.78               | 0.87             | 1.18              | -0.15            | -0.37          | 0.04            | Acadvl        | NM_017366   | Mus musculus acyl-Coenzyme A dehydrogenase very long chain (Acadvl) mRNA.                                          |
| scd40005.7.1-7-S      | 0.92             | 1.04           | 1.25            | 0.75               | 0.88             | 1.30              | -0.23            | -0.25          | 0.07            | Rai12         | NM_018740.1 | Mus musculus retinoic acid induced 12 (Rai12) mRNA.                                                                |
| scd40009.3.137-12-S   | 0.88             | 0.90           | 1.27            | 0.73               | 0.82             | 1.27              | -0.27            | -0.18          | 0.18            | Neda          | NM_023668.1 | Mus musculus nuclear distribution gene E-like homolog 1 (A. nidulans) (Neda1) mRNA.                                |
| scd40050.12.410-S     | 0.96             | 1.10           | 1.43            | 0.80               | 0.90             | 1.51              | -0.27            | -0.28          | 0.09            | Ndel1         | NM_023668.1 | Mus musculus nuclear distribution gene E-like homolog 1 (A. nidulans) (Ndel1) mRNA.                                |
| scd40072.13.201-S     | 0.92             | 1.07           | 1.13            | 0.82               | 0.94             | 1.22              | -0.16            | -0.19          | 0.12            | Map2k4        | NM_009157   | Mus musculus mitogen activated protein kinase kinase 4 (Map2k4) mRNA.                                              |
| scd40083.7.1-85-S     | 1.04             | 0.99           | 1.25            | 0.90               | 0.84             | 1.49              | -0.20            | -0.24          | 0.26            | Cox10         | NM_178379.2 | Mus musculus COX10 homolog cytochrome c oxidase assembly protein heme A: farnesyltransferase (yeast) (Cox10) mRNA. |
| scd40101.5.1-17-S     | 0.85             | 1.08           | 1.40            | 0.74               | 0.98             | 1.72              | -0.21            | -0.12          | 0.30            | 3110013401Rik | XM_203393.1 | Mus musculus RIKEN cDNA 3110013401 gene (3110013401Rik) mRNA.                                                      |
| scd40143.1.333-S      | 0.94             | 1.03           | 1.26            | 0.81               | 0.90             | 1.41              | -0.22            | -0.19          | 0.17            | 5730466P16Rik | NM_173453.1 | Mus musculus RIKEN cDNA 5730466P16 gene (5730466P16Rik) mRNA.                                                      |
| scd40153.15.1-40-S    | 0.90             | 1.00           | 1.28            | 0.72               | 0.88             | 1.42              | -0.31            | -0.02          | 0.10            | Cops3         | NM_011991.1 | Mus musculus COP3 (constitutive photomorphogenic) homolog subunit 3 (Arabidopsis thaliana) (Cops3) mRNA.           |
| scd40154.14.234-S     | 0.88             | 1.20           | 1.32            | 0.76               | 0.86             | 1.20              | -0.27            | -0.47          | -0.05           | 0430214A04Rik | NM_146018.1 |                                                                                                                    |
| scd40166.10.1-13-S    | 0.85             | 1.07           | 1.12            | 0.81               | 0.91             | 1.20              | -0.08            | -0.23          | 0.11            | Guk1          | NM_008193   | Mus musculus guanlylate kinase 1 (Guk1) mRNA.                                                                      |
| scd40178.5.602-S      | 0.71             | 1.04           | 1.06            | 0.66               | 0.94             | 1.27              | -0.10            | -0.16          | 0.26            | Zfp39         | NM_011758.1 | Mus musculus zinc finger protein 39 (Zfp39) mRNA.                                                                  |
| scd40200.14.192-S     | 0.96             | 1.15           | 1.28            | 0.92               | 0.88             | 1.26              | -0.05            | -0.38          | -0.03           | 1810073G14Rik | NM_026342.1 | Mus musculus RIKEN cDNA 1810073G14 gene (1810073G14Rik) mRNA.                                                      |
| scd40204.6.1-30-S     | 1.03             | 1.03           | 1.19            | 0.93               | 0.76             | 1.13              | -0.14            | -0.43          | -0.08           | Atox1         | NM_009720.2 | Mus musculus ATX1 (antioxidant protein 1) homolog 1 (yeast) (Atox1) mRNA.                                          |
| scd40273.5.591-S      | 0.92             | 1.13           | 1.31            | 0.75               | 0.88             | 1.25              | -0.30            | -0.35          | -0.05           | Mam1          | NM_175334.2 | Mus musculus mastermind like 1 (Drosophila) (Mam1) mRNA.                                                           |
| scd40322.5.155-S      | 0.81             | 1.06           | 1.17            | 0.66               | 0.96             | 1.36              | -0.31            | -0.14          | 0.22            | Ptfg1         | NM_013917.1 | Mus musculus pituitary tumor-transforming 1 (Ptfg1) mRNA.                                                          |
| scd40361.13.1-26-S    | 1.03             | 0.97           | 1.26            | 0.82               | 0.92             | 1.48              | -0.18            | -0.48          | 0.16            | Rplp1         | NM_026531.1 | Mus musculus ribosomal protein L1 (Rplp1) mRNA.                                                                    |
| scd40428.15.1-30-S    | 0.84             | 1.07           | 1.38            | 0.75               | 0.95             | 1.52              | -0.18            | -0.17          | 0.14            | Vkz2          | NM_027260.1 | Mus musculus vacuolar H <sup>+</sup> ATPase (Vha22) mRNA.                                                          |
| scd40580.5.1-111-S    | 0.94             | 1.06           | 1.29            | 0.80               | 0.92             | 1.47              | -0.24            | -0.21          | 0.19            | 1110020P15Rik | NM_197979.1 | Mus musculus RIKEN cDNA 1110020P15 gene (1110020P15Rik) mRNA.                                                      |
| scd40589.5.1-6-S      | 0.77             | 1.00           | 1.16            | 0.84               | 0.98             | 1.44              | 0.13             | -0.03          | 0.32            | 1700020C11Rik | NM_026443.2 | Mus musculus RIKEN cDNA 1700020C11 gene (1700020C11Rik) mRNA.                                                      |
| scd40597.27.1-84-S    | 1.07             | 1.15           | 1.08            | 0.99               | 0.90             | 1.00              | -0.11            | -0.33          | -0.11           | Smtm          | NM_013870.1 | Mus musculus smoothenin (Smtm) mRNA.                                                                               |
| scd40603.7.49-6-S     | 0.85             | 1.07           | 1.37            | 0.75               | 0.96             | 1.60              | -0.17            | -0.16          | 0.22            | Drg1          | NM_007679.1 | Mus musculus developmentally regulated GTP binding protein 1 (Drg1) mRNA.                                          |
| scd40612.43.1-21-S    | 0.93             | 1.05           | 1.14            | 0.82               | 0.89             | 1.08              | -0.18            | -0.24          | -0.09           | Tbcd          | NM_028722.2 | Mus musculus RIKEN cDNA 4430402011 gene (4430402011Rik) mRNA.                                                      |
| scd40616.11.083-S     | 0.59             | 1.08           | 0.98            | 1.04               | 0.59             | 1.04              | 0.31             | -0.14          | 0.00            | 4430402011Rik | NM_028722.2 | Mus musculus RIKEN cDNA 4430402011 gene (4430402011Rik) mRNA.                                                      |
| scd40658.10.1-134-S   | 1.05             | 0.98           | 1.24            | 0.85               | 0.85             | 1.11              | -0.30            | -0.21          | -0.16           | D11Ert759e    | NM_172949.1 | Mus musculus DNA segment Chr 11 ERATO Dst 759 expressed (D11Ert759e) mRNA.                                         |
| scd40710.6.1-96-S     | 1.02             | 0.98           | 1.07            | 0.83               | 0.97             | 1.03              | -0.29            | -0.18          | -0.05           | 2310004N24Rik | XM_181318.4 | Mus musculus RIKEN cDNA 2310004N24 gene (2310004N24Rik) mRNA.                                                      |
| scd40724.4.1-15-S     | 0.93             | 1.03           | 1.25            | 0.83               | 0.87             | 1.59              | -0.16            | -0.09          | 0.34            | Mrps7         | NM_025305.1 | Mus musculus mitochondrial ribosomal protein S7 (Mrps7) mRNA.                                                      |
| scd40726.5.15-S       | 0.92             | 1.13           | 1.22            | 0.82               | 0.78             | 1.12              | -0.15            | -0.53          | -0.12           | Kctd2         | NM_183285.1 | Mus musculus potassium channel tetramerisation domain containing 2 (Kctd2) mRNA.                                   |
| scd40730.4.466-S      | 1.14             | 0.97           | 1.22            | 0.88               | 0.74             | 1.03              | -0.38            | -0.38          | -0.25           | Armc7         | NM_177778.3 | Mus musculus armadillo-like domain containing 7 (Armc7) mRNA.                                                      |
| scd40751.1-9-S        | 1.07             | 0.90           | 1.23            | 0.86               | 0.84             | 1.41              | -0.33            | -0.10          | 0.21            | Rp38          | NM_023721.1 | Mus musculus ribosomal protein L38 (Rp38) mRNA.                                                                    |
| scd40755.5.1-55-S     | 0.92             | 1.09           | 1.17            | 0.83               | 0.89             | 1.32              | -0.14            | -0.25          | 0.18            | 17011Wsu47e   | NM_127173.3 | Mus musculus DNA segment Chr 11 Wayne State University 47 expressed (D11Wsu47e) mRNA.                              |
| scd40763.8.142-S      | 0.95             | 1.13           | 1.28            | 0.99               | 0.75             | 1.26              | -0.07            | -0.58          | -0.02           | Kcnj16        | NM_010504.2 | Mus musculus potassium inwardly-rectifying channel subfamily J member 16 (Kcnj16) mRNA.                            |
| scd40772.15.67-S      | 0.97             | 1.10           | 1.34            | 0.88               | 0.90             | 1.38              | -0.13            | -0.27          | 0.05            | Pkriat1a      | NM_021880.1 | Mus musculus protein kinase cAMP dependent regulatory type I alpha (Pkriat1a) mRNA.                                |
| scd40826.8.1-20-S     | 0.95             | 1.06           | 1.21            | 0.85               | 0.95             | 1.51              | -0.16            | -0.16          | 0.32            | Mettl2        | NM_172561.1 | Mus musculus methyltransferase like 2 (Mettl2) mRNA.                                                               |
| scd40837.7.339-S      | 0.99             | 1.02           | 1.24            | 0.87               | 0.83             | 1.15              | -0.18            | -0.30          | -0.11           | Ar12          | NM_007477.2 | Mus musculus ADP-ribosylation factor 2 (Ar12) mRNA.                                                                |
| scd40862.5.379-S      | 0.97             | 1.09           | 1.07            | 0.90               | 0.92             | 1.05              | -0.11            | -0.25          | -0.02           | 2010008E23Rik | XM_126502.4 | Mus musculus RIKEN cDNA 2010008E23 gene (2010008E23Rik) mRNA.                                                      |
| scd40877.8.1-11-S     | 1.12             | 0.89           | 1.19            | 0.94               | 0.73             | 1.07              | -0.25            | -0.29          | -0.15           | BC022145      | NM_144830.1 | Mus musculus cDNA sequence BC022145 (BC022145) mRNA.                                                               |
| scd40890.2.6-S        | 1.08             | 0.97           | 1.09            | 0.99               | 0.87             | 0.99              | -0.12            | -0.53          | -0.15           | Ramp2         | NM_019441.1 | Mus musculus receptor (calcitonin) activity modifying protein 2 (Ramp2) mRNA.                                      |
| scd40985.2.1-86-S     | 1.03             | 1.12           | 1.17            | 0.93               | 0.92             | 1.07              | -0.14            | -0.28          | 0.13            | Hoxd4         | NM_010459   | Mus musculus homeo box B4 (Hoxd4) mRNA.                                                                            |
| scd41012.9.1-84-S     | 1.03             | 0.96           | 1.11            | 0.93               | 0.85             | 1.29              | -0.14            | -0.18          | 0.22            | Ugat2         | NM_016752.1 | Mus musculus UDP-galactose 4-epimerase (Ugat2) mRNA.                                                               |
| scd41018.11.650-S     | 0.72             | 1.06           | 1.26            | 0.62               | 0.95             | 1.51              | -0.22            | -0.16          | 0.26            | BC034054      | NM_178049.2 | Mus musculus cDNA sequence BC034054 (BC034054) mRNA.                                                               |
| scd41047.11.267-S     | 0.95             | 1.10           | 1.14            | 0.79               | 0.78             | 1.04              | -0.27            | -0.49          | -0.13           | Mmd           | NM_026178.2 | Mus musculus monocyte to macrophage differentiation-associated (Mmd) mRNA.                                         |
| scd41124.9.150-S      | 1.03             | 0.97           | 1.10            | 0.90               | 0.87             | 1.12              | -0.19            | -0.30          | 0.04            | Ap1gtp1       | NM_194341.1 | Mus musculus AP1 gamma subunit binding protein 1 (Ap1gtp1) mRNA.                                                   |
| scd41127.15.1-23-S    | 1.02             | 1.00           | 1.25            | 0.84               | 0.89             | 1.34              | -0.28            | -0.16          | 0.11            | Dad2          | NM_030096.1 | Mus musculus DEAD (Asp-Glu-Ala-Asp) box polypeptide 52 (Dad2) mRNA.                                                |
| scd41197.5.1-16-S     | 0.94             | 1.11           | 1.25            | 0.90               | 0.82             | 1.35              | -0.07            | -0.24          | 0.12            | 0610009H04Rik | NM_028963.1 | Mus musculus RIKEN cDNA 0610009H04 gene (0610009H04Rik) mRNA.                                                      |
| scd41198.10.516-S     | 1.01             | 1.06           | 1.15            | 0.95               | 0.85             | 1.29              | -0.09            | -0.25          | 0.29            | D29Ert759e    | NM_172949.1 | Mus musculus DNA segment Chr 11 ERATO Dst 759 expressed (D29Ert759e) mRNA.                                         |
| scd41210.3.123-9-S    | 0.90             | 1.04</         |                 |                    |                  |                   |                  |                |                 |               |             |                                                                                                                    |

| Gene Name            | Control<br>18 Hours | Control<br>1 Week | Control<br>4 Weeks | Treatment<br>18 Hours | Treatment<br>1 Week | Treatment<br>4 Weeks | Log2 FC<br>18 Hours | Log2 FC<br>1 Week | Log2 FC<br>4 Weeks | Symbol        | Accession   | Definition                                                                                       |
|----------------------|---------------------|-------------------|--------------------|-----------------------|---------------------|----------------------|---------------------|-------------------|--------------------|---------------|-------------|--------------------------------------------------------------------------------------------------|
| scd42309.7.1 14-S    | 1.06                | 1.04              | 1.25               | 0.85                  | 0.81                | 1.22                 | -0.32               | -0.35             | -0.03              | Vil1b         | NM_016800.2 | Mus musculus vesicle transport through interaction with 1-SNAREs 1B homolog (Vil1b) mRNA.        |
| scd42320.8 4-S       | 0.89                | 1.10              | 1.30               | 0.77                  | 0.82                | 1.29                 | -0.22               | -0.42             | 0.00               | Max           | NM_008558   | Mus musculus Max protein (Max) mRNA.                                                             |
| scd42371.18.1 30-S   | 1.05                | 1.05              | 1.00               | 0.83                  | 0.81                | 1.14                 | -0.33               | -0.38             | 0.18               | Pygl          | NM_133198.1 | Mus musculus liver glycogen phosphorylase (Pygl) mRNA.                                           |
| scd42444.40 226-S    | 1.10                | 1.09              | 1.24               | 0.85                  | 0.81                | 1.02                 | -0.36               | -0.42             | -0.28              | Garr1t        | NM_019994.3 | Mus musculus GTPase activating RANGAP domain-like 1 (Garr1t) mRNA.                               |
| scd42454.7.1 178-S   | 0.82                | 1.01              | 1.28               | 0.68                  | 1.03                | 1.36                 | -0.28               | -0.01             | 0.23               | D230037C09Rik | NM_028941.1 | Mus musculus RIKEN cDNA 2700097C09 gene (2700097C09Rik) mRNA.                                    |
| scd42456.11 22-S     | 0.84                | 1.06              | 1.20               | 0.74                  | 0.97                | 1.32                 | -0.18               | -0.12             | 0.15               | BC065123      | NM_172576.1 |                                                                                                  |
| scd42528.12.1 19-S   | 1.09                | 0.90              | 1.20               | 0.84                  | 0.72                | 1.17                 | -0.38               | -0.33             | -0.03              | Bzw2          | NM_025840.2 | Mus musculus basic leucine zipper and W2 domains 2 (Bzw2) mRNA.                                  |
| scd42558.9 161-S     | 1.00                | 0.94              | 1.25               | 0.79                  | 0.75                | 1.08                 | -0.35               | -0.32             | -0.20              | Bcap29        | NM_007530.2 | Mus musculus B-cell receptor-associated protein 29 (Bcap29) mRNA.                                |
| scd42588.12 910 0-S  | 1.15                | 1.06              | 1.11               | 0.81                  | 0.88                | 0.98                 | -0.53               | -0.25             | -0.18              | Rnf144        | NM_080563.2 | Mus musculus ring finger protein 144 (Rnf144) mRNA.                                              |
| scd42615.25.0 1-S    | 0.92                | 1.02              | 1.38               | 0.82                  | 0.93                | 1.66                 | -0.16               | -0.13             | 0.28               | Ddx1          | NM_134040.1 | Mus musculus DEAD (Asp-Glu-Ala-Asp) box polypeptide 1 (Ddx1) mRNA.                               |
| scd42728.4.1 1-S     | 0.78                | 1.05              | 1.15               | 0.66                  | 0.97                | 1.38                 | -0.24               | -0.10             | 0.26               | Siva          | NM_013929   | Mus musculus C27 binding protein (Hinda) Gdn of destruction (Siva) mRNA.                         |
| scd42750.13 365-S    | 0.72                | 0.99              | 1.23               | 0.69                  | 1.03                | 1.38                 | -0.23               | -0.01             | 0.21               | Infac2        | NM_029341.1 | Mus musculus tumor necrosis factor alpha-induced protein 2 (Infac2) mRNA.                        |
| scd42796.25 96-S     | 1.03                | 1.00              | 1.21               | 0.86                  | 0.76                | 1.08                 | -0.28               | -0.38             | -0.16              | Emi1          | XM_127139.5 | Mus musculus echinoderm microtubule associated protein like 1 (Emi1) mRNA.                       |
| scd42853.2.1 24-S    | 0.96                | 1.09              | 1.38               | 0.87                  | 0.95                | 1.50                 | -0.15               | -0.20             | 0.12               | D230037D09Rik | NM_177140.2 | Mus musculus RIKEN cDNA D230037D09 gene (D230037D09Rik) mRNA.                                    |
| scd42862.16 16-S     | 0.82                | 1.04              | 1.20               | 0.69                  | 0.94                | 1.28                 | -0.24               | -0.14             | 0.11               | Cpsf2         | NM_016856.2 | Mus musculus cleavage and polyadenylation specific factor 2 (Cpsf2) mRNA.                        |
| scd42936.6.9 32-S    | 0.81                | 1.00              | 1.15               | 0.68                  | 0.99                | 1.69                 | -0.24               | -0.01             | 0.54               | Ahsa1         | NM_146036.1 | Mus musculus AHA1 activator of heat shock 90kDa protein ATPase homolog 1 (yeast) (Ahsa1) mRNA.   |
| scd42938.12 138-S    | 1.04                | 1.05              | 1.08               | 0.93                  | 0.82                | 1.15                 | -0.16               | -0.35             | 0.10               | Gstz1         | NM_010363.2 | Mus musculus glutathione transferase zeta 1 (maleyleylacetate isomerase) (Gstz1) mRNA.           |
| scd42950.10 98-S     | 1.01                | 0.92              | 1.15               | 0.92                  | 0.70                | 1.09                 | -0.14               | -0.38             | -0.09              | 1700019E19Rik | NM_029601.1 | Mus musculus RIKEN cDNA 1700019E19 gene (1700019E19Rik) mRNA.                                    |
| scd42976.13.1 6-S    | 0.88                | 1.07              | 1.20               | 0.82                  | 0.92                | 1.29                 | -0.12               | -0.23             | 0.10               | Cog6          | NM_172582.1 | Mus musculus coenzyme Q6 homolog (yeast) (Cog6) mRNA.                                            |
| scd42999.15.1 85-S   | 1.02                | 1.01              | 1.08               | 0.86                  | 0.85                | 1.13                 | -0.24               | -0.25             | 0.07               | Wd21          | NM_030246.1 | Mus musculus WD repeat domain 21 (Wd21) mRNA.                                                    |
| scd43022.1 1-S       | 0.98                | 1.10              | 1.27               | 0.79                  | 0.86                | 1.37                 | -0.30               | -0.34             | 0.11               | 4933426M11Rik | NM_178682.3 | Mus musculus RIKEN cDNA 4933426M11 gene (4933426M11Rik) mRNA.                                    |
| scd43059.15.1 19-S   | 0.93                | 1.05              | 1.27               | 0.80                  | 0.97                | 1.29                 | -0.23               | -0.10             | 0.02               | Fut8          | NM_016893.2 | Mus musculus fucosyltransferase 8 (Fut8) mRNA.                                                   |
| scd43064.12 579-S    | 0.71                | 1.15              | 1.21               | 0.62                  | 0.96                | 1.35                 | -0.18               | -0.26             | 0.17               | Fntb          | NM_145927.1 | Mus musculus farnesyltransferase CAAX box beta (Fntb) mRNA.                                      |
| scd43090.8 531-S     | 1.06                | 1.01              | 1.13               | 0.93                  | 0.78                | 1.02                 | -0.19               | -0.35             | -0.15              | Rhoj          | NM_023275.1 | Mus musculus ras homolog gene family member J (Rhoj) mRNA.                                       |
| scd43154.2 481-S     | 0.93                | 1.07              | 1.33               | 0.83                  | 0.84                | 1.32                 | -0.17               | -0.34             | 0.00               | Arh6          | NM_007481.1 | Mus musculus ADP-ribosylation factor 6 (Arh6) mRNA.                                              |
| scd43155.10 40 7-S   | 0.71                | 1.05              | 1.26               | 0.61                  | 0.97                | 1.44                 | -0.24               | -0.12             | 0.19               | Khm2c         | NM_027171.1 | Mus musculus kelch domain containing 2 (Khm2c) mRNA.                                             |
| scd43170.10 1 80-S   | 0.91                | 1.07              | 1.24               | 0.77                  | 0.91                | 1.38                 | -0.22               | -0.17             | 0.27               | Sp1           | NM_025695.1 | Mus musculus survival of motor neuron protein interacting protein 1 (Sp1) mRNA.                  |
| scd43223.12.1 25-S   | 0.95                | 1.08              | 1.37               | 0.82                  | 0.85                | 1.35                 | -0.21               | -0.36             | -0.02              | Ap4s1         | NM_021710.1 | Mus musculus adaptor-related protein complex AP-4 sigma 1 (Ap4s1) mRNA.                          |
| scd43225.27.1 94-S   | 1.03                | 0.94              | 1.16               | 0.93                  | 0.78                | 1.07                 | -0.15               | -0.26             | -0.13              | Sclt1         | XM_126906.2 |                                                                                                  |
| scd43302.13 107-S    | 0.98                | 1.06              | 1.37               | 0.84                  | 0.77                | 1.36                 | -0.21               | -0.46             | -0.01              | Pbel1         | NM_021541.1 | Mus musculus pre-B-cell colony-enhancing factor 1 (Pbel1) mRNA.                                  |
| scd43457.15.1 29-S   | 0.95                | 1.04              | 1.19               | 0.86                  | 0.90                | 1.35                 | -0.15               | -0.22             | 0.20               | Mrps30        | NM_021556.2 | Mus musculus mitochondrial ribosomal protein S30 (Mrps30) mRNA.                                  |
| scd43488.6 364-S     | 1.07                | 1.06              | 1.31               | 0.88                  | 0.78                | 1.24                 | -0.29               | -0.43             | -0.07              | Snaq1         | NM_137096.1 | Mus musculus sorting nexin associated golgi protein 1 (Snaq1) mRNA.                              |
| scd43560.31 591-S    | 0.95                | 1.11              | 1.25               | 0.84                  | 0.78                | 1.17                 | -0.16               | -0.46             | -0.09              | 4930420C11Rik | NM_283179.2 | Mus musculus RIKEN cDNA 4930420C11 gene (4930420C11Rik) mRNA.                                    |
| scd43566.17.1 216-S  | 0.97                | 1.03              | 1.31               | 0.82                  | 0.92                | 1.45                 | -0.25               | -0.15             | 0.05               | Sec5          | NM_025588.1 | Mus musculus solute carrier family 30 (anion transporter) member 5 (Sec5a5) mRNA.                |
| scd43586.8 235-S     | 0.64                | 1.02              | 1.12               | 0.53                  | 1.01                | 1.26                 | -0.27               | 0.01              | 0.18               | Ccnb1         | NM_172301.2 | Mus musculus cyclin B1 (Ccnb1) mRNA.                                                             |
| scd43635.12 640-S    | 1.04                | 1.00              | 1.13               | 0.87                  | 0.80                | 1.02                 | -0.24               | -0.31             | -0.15              | AW544865      | NM_178918.2 | Mus musculus expressed sequence AW544865 (AW544865) mRNA.                                        |
| scd43661.2 29-S      | 0.96                | 1.05              | 1.25               | 0.93                  | 0.70                | 1.21                 | -0.06               | -0.57             | -0.04              | F2r           | NM_010169.2 | Mus musculus coagulation factor II (thrombin) receptor (F2r) mRNA.                               |
| scd43692.18.1 6-S    | 1.00                | 1.03              | 1.27               | 0.81                  | 0.84                | 1.13                 | -0.31               | -0.29             | -0.17              | Zlyve16       | NM_173392.1 | Mus musculus zinc finger FYVE domain containing 16 (Zlyve16) mRNA.                               |
| scd43763.13.4 92-S   | 0.91                | 0.99              | 1.23               | 0.82                  | 0.99                | 1.30                 | -0.16               | 0.01              | 0.09               | Tript13       | XM_127444.3 | Mus musculus thyroid hormone receptor interactor 13 (Tript13) mRNA.                              |
| scd43828.6 15-S      | 0.69                | 1.11              | 1.37               | 0.60                  | 0.88                | 1.58                 | -0.23               | -0.17             | 0.22               | Zfp367        | NM_175494.2 | Mus musculus zinc finger protein 367 (Zfp367) mRNA.                                              |
| scd43862.7.1 7-S     | 1.19                | 1.20              | 1.04               | 0.98                  | 0.89                | 0.83                 | -0.26               | -0.43             | 0.03               |               |             |                                                                                                  |
| scd43914.11.4 21-S   | 1.14                | 1.08              | 1.14               | 0.93                  | 0.71                | 0.99                 | -0.28               | -0.60             | -0.42              | H2afy         | NM_012015.1 | Mus musculus H2A histone family member Y (H2afy) mRNA.                                           |
| scd43949.6.1 8-S     | 0.87                | 1.11              | 1.22               | 0.82                  | 0.83                | 1.23                 | -0.09               | -0.43             | 0.01               | Thoc3         | NM_028597.1 | Mus musculus THO complex 3 (Thoc3) mRNA.                                                         |
| scd44051.9.1 139-S   | 1.16                | 1.01              | 1.05               | 1.01                  | 0.81                | 1.01                 | -0.20               | -0.33             | -0.05              | Tbcl1d7       | NM_025935.1 | Mus musculus TBC1 domain family member 7 (Tbcl1d7) mRNA.                                         |
| scd44068.10 181-S    | 0.98                | 1.07              | 1.25               | 0.86                  | 0.82                | 1.13                 | -0.19               | -0.39             | -0.15              | Sc35b3        | NM_134060.2 | Mus musculus solute carrier family 35 member B3 (Sc35b3) mRNA.                                   |
| scd44136.34 344-S    | 0.89                | 1.13              | 1.24               | 0.81                  | 0.86                | 1.19                 | -0.13               | -0.40             | -0.06              | Sec5i         | NM_025588.1 | Mus musculus SEC5-like 1 (S. cerevisiae) (Sec5i) mRNA.                                           |
| scd44249.4 7-S       | 0.63                | 1.00              | 1.15               | 0.55                  | 0.98                | 1.60                 | -0.20               | -0.01             | 0.47               | AU040950      | NM_134065.2 | Mus musculus expressed sequence AU040950 (AU040950) mRNA.                                        |
| scd44304.18 267-S    | 0.87                | 1.03              | 1.23               | 0.83                  | 0.84                | 1.34                 | -0.24               | -0.34             | 0.11               | G23a4         | NM_028941.1 | Mus musculus GTP binding protein 4 (G23a4) mRNA.                                                 |
| scd44322.14.1 14-S   | 0.91                | 1.22              | 1.35               | 0.80                  | 0.92                | 1.27                 | -0.19               | -0.40             | -0.08              | 4833420G17Rik | NM_026127.3 | Mus musculus RIKEN cDNA 4833420G17 gene (4833420G17Rik) mRNA.                                    |
| scd44342.6.5 4-S     | 1.03                | 0.98              | 1.20               | 0.89                  | 0.83                | 1.15                 | -0.20               | -0.24             | -0.05              | Mocs2         | NM_013826.1 | Mus musculus molybdenum cofactor synthesis 2 (Mocs2) mRNA.                                       |
| scd44383.15 255-S    | 0.59                | 0.99              | 1.27               | 0.54                  | 1.02                | 1.67                 | -0.13               | 0.04              | -0.39              | D130064H19Rik | NM_172593.1 | Mus musculus RIKEN cDNA D130064H19 gene (D130064H19Rik) mRNA.                                    |
| scd44477.7 25-S      | 1.11                | 0.98              | 1.28               | 0.91                  | 0.93                | 1.11                 | -0.29               | -0.08             | -0.22              | Ankraz        | NM_023472.1 | Mus musculus ankyrin repeat family A (RFXANK-like) 2 (Ankraz) mRNA.                              |
| scd44526.12 201-S    | 1.03                | 0.97              | 1.04               | 0.89                  | 0.85                | 1.18                 | -0.22               | -0.19             | 0.19               | Homer1        | NM_152134.1 | Mus musculus homer homolog 1 (Drosophila) (Homer1) transcript variant d mRNA.                    |
| scd44632.16.1 30-S   | 0.97                | 1.09              | 1.35               | 0.93                  | 0.82                | 1.32                 | -0.06               | -0.39             | -0.03              | C130052112Rik | NM_146047.1 | Mus musculus RIKEN cDNA C130052112 gene (C130052112Rik) mRNA.                                    |
| scd44672.5.1 29-S    | 0.86                | 1.08              | 1.29               | 0.81                  | 0.88                | 1.16                 | -0.29               | -0.16             | 0.05               | Ep3           | NM_028811.1 | Mus musculus elongation protein 3 homolog (S. cerevisiae) (Ep3) mRNA.                            |
| scd44750.12 316-S    | 0.99                | 1.04              | 1.23               | 0.89                  | 0.91                | 1.30                 | -0.16               | -0.18             | -0.08              | 2210404D11Rik | NM_178397.2 | Mus musculus RIKEN cDNA 2210404D11 gene (2210404D11Rik) mRNA.                                    |
| scd44752.2.1 30-S    | 0.90                | 1.14              | 1.25               | 0.81                  | 0.91                | 1.39                 | -0.15               | -0.32             | 0.16               | 2010110M21Rik | NM_025933.1 | Mus musculus RIKEN cDNA 2010110M21 gene (2010110M21Rik) mRNA.                                    |
| scd44784.10.1 138-S  | 1.12                | 0.95              | 1.03               | 0.96                  | 0.83                | 0.96                 | -0.21               | -0.19             | -0.11              | Fbw17         | NM_175401.2 |                                                                                                  |
| scd44903.11.3 96-S   | 0.93                | 1.05              | 1.06               | 0.80                  | 0.80                | 1.20                 | -0.21               | -0.40             | 0.18               | Fars1         | NM_024274.1 | Mus musculus phenylalanine-tRNA synthetase 1 (mitochondrial) (Fars1) mRNA.                       |
| scd44950.4.1 46-S    | 0.89                | 1.01              | 1.17               | 0.83                  | 0.80                | 1.22                 | -0.08               | -0.35             | 0.06               | Agtr1         | NM_177322.2 | Mus musculus angiotensin receptor 1 (Agtr1) mRNA.                                                |
| scd45125.3 164-S     | 1.03                | 1.00              | 1.25               | 0.84                  | 0.80                | 1.11                 | -0.30               | -0.23             | -0.10              | BC006662      | NM_145486   | Mus musculus cDNA sequence BC006662 (BC006662) mRNA.                                             |
| scd45160.13 9-S      | 0.85                | 1.03              | 1.25               | 0.78                  | 0.85                | 1.26                 | -0.35               | -0.14             | 0.16               | Abcc4         | NM_133262.2 | Mus musculus ABC11 binding cassette subfamily C (ATF14MR) member 4 (Abcc4) mRNA.                 |
| scd45217.22.1 37-S   | 0.97                | 1.04              | 1.22               | 0.81                  | 0.87                | 1.17                 | -0.27               | -0.26             | -0.14              | 2810028N01Rik | NM_028315.1 | Mus musculus RIKEN cDNA 2810028N01 gene (2810028N01Rik) mRNA.                                    |
| scd45266.21 295-S    | 0.84                | 1.11              | 1.05               | 0.79                  | 0.87                | 1.17                 | -0.08               | -0.18             | 0.15               | 1300019C06Rik | NM_025832.2 | Mus musculus RIKEN cDNA 1300019C06 gene (1300019C06Rik) mRNA.                                    |
| scd45293.12.6 30-S   | 0.97                | 1.04              | 1.17               | 0.84                  | 0.88                | 1.27                 | -0.21               | -0.25             | 0.12               | Glt2l2        | NM_026816.1 | Mus musculus general transcription factor IIF polypeptide 2 (Glt2l2) mRNA.                       |
| scd45300.23 484-S    | 0.94                | 1.06              | 1.21               | 0.81                  | 0.87                | 1.24                 | -0.21               | -0.28             | 0.05               | Cog3          | NM_177381   | Mus musculus component of oligomeric golgi complex 3 (Cog3) mRNA.                                |
| scd45363.6 489-S     | 0.91                | 1.09              | 1.17               | 0.81                  | 0.95                | 1.31                 | -0.17               | -0.20             | 0.16               | 6330407G04Rik | NM_134078.2 | Mus musculus RIKEN cDNA 6330407G04 gene (6330407G04Rik) mRNA.                                    |
| scd45394.8.1 112-S   | 1.02                | 1.02              | 1.09               | 0.94                  | 0.86                | 1.02                 | -0.10               | -0.26             | -0.09              | 1700020M16Rik | XM_127811.4 | Mus musculus RIKEN cDNA 1700020M16 gene (1700020M16Rik) mRNA.                                    |
| scd45413.15 171-S    | 0.98                | 1.07              | 1.18               | 0.87                  | 0.89                | 1.23                 | -0.17               | -0.44             | 0.03               | Elp3          | NM_028811.1 | Mus musculus elongation protein 3 homolog (S. cerevisiae) (Elp3) mRNA.                           |
| scd45419.1 422 138-S | 0.94                | 1.12              | 1.21               | 0.87                  | 0.89                | 1.21                 | -0.10               | -0.31             | 0.00               | Ed3           | NM_018788.2 | Mus musculus exostosins (multiple) like 3 (Ed3) mRNA.                                            |
| scd45491.13.1 29-S   | 1.01                | 1.02              | 1.19               | 0.87                  | 0.77                | 1.07                 | -0.21               | -0.41             | -0.15              | Cry1l         | NM_030004.2 | Mus musculus crystallin lambda 1 (Cry1l) mRNA.                                                   |
| scd45515.5.1 34-S    | 1.57                | 1.47              | 0.49               | 1.10                  | 0.99                | 0.73                 | -0.51               | -0.51             | 0.53               | Ctsb          | NM_007800.1 | Mus musculus cathepsin G (Ctsb) mRNA.                                                            |
| scd45525.10.1 76-S   | 1.16                | 0.93              | 1.12               | 0.99                  | 0.73                | 1.01                 | -0.26               | -0.33             | -0.14              | Ripk3         | NM_019955.1 | Mus musculus receptor-interacting serine-threonine kinase 3 (Ripk3) mRNA.                        |
| scd45531.6.1 0-S     | 0.96                | 1.01              | 1.14               | 0.75                  | 0.84                | 1.18                 | -0.37               | -0.27             | 0.06               | Nedd8         | NM_006683   | Mus musculus neural precursor cell expressed developmentally down-regulated gene 8 (Nedd8) mRNA. |
| scd45535.5 307-S     | 0.94                | 1.10              | 1.19               | 0.93                  | 0.86                | 1.29                 | -0.01               | -0.33             | 0.12               | 1810034K20Rik | NM_023397.3 | Mus musculus RIKEN cDNA 1810034K20 gene (1810034K20Rik) mRNA.                                    |
| scd45649.23.1 26-S   | 0.73                | 0.99              | 1.28               | 0.62                  | 1.02                | 1.60                 | -0.23               | -0.04             | 0.32               | Wdr61         | NM_172592.2 |                                                                                                  |
| scd45706.11 2 19-S   | 1.02                | 0.94              | 1.28               | 0.91                  | 0.87                | 1.16                 | -0.17               | -0.27             | 0.04               | Glt1          | NM_007481.1 |                                                                                                  |
| scd45748.3 30-S      | 0.91                | 1.05              | 1.16               | 0.84                  | 0.87                | 1.09                 | -0.11               | -0.28             | -0.08              | 2610018L09Rik | NM_172254.2 | Mus musculus growth hormone inducible transmembrane protein (Ghim) mRNA.                         |
| scd45764.20 72-S     | 0                   |                   |                    |                       |                     |                      |                     |                   |                    |               |             |                                                                                                  |

| Gene Name             | Control 18 Hours | Control 1 Week | Control 4 Weeks | Treatment 18 Hours | Treatment 1 Week | Treatment 4 Weeks | Log2 FC 18 Hours | Log2 FC 1 Week | Log2 FC 4 Weeks | Symbol        | Accession     | Definition                                                                                                             |
|-----------------------|------------------|----------------|-----------------|--------------------|------------------|-------------------|------------------|----------------|-----------------|---------------|---------------|------------------------------------------------------------------------------------------------------------------------|
| scd46822.5_2-S        | 0.91             | 1.10           | 1.10            | 0.87               | 0.88             | 1.13              | -0.06            | -0.33          | 0.05            | Yaf2          | NM_024189.4   | Mus musculus YY1 associated factor 2 (Yaf2) mRNA.                                                                      |
| scd46872.13_7-S       | 0.99             | 1.05           | 1.32            | 0.85               | 0.77             | 1.15              | -0.23            | -0.44          | -0.20           | Cerk          | NM_145475     | Mus musculus ceramide kinase (Cerk) mRNA.                                                                              |
| scd46904.9_7-S        | 0.84             | 1.06           | 1.19            | 0.77               | 0.93             | 1.27              | -0.13            | -0.20          | 0.10            | Poldp3        | NM_178627.1   | Mus musculus polymerase (DNA-directed) delta interacting protein 3 (Poldp3) mRNA.                                      |
| scd46926.5_1_59-S     | 0.88             | 1.08           | 1.16            | 0.93               | 0.94             | 1.18              | -0.08            | -0.21          | 0.04            | D15Wsu75e     | NM_134095.2   | Mus musculus DNA segment Chr 15 Wayne State University 75 expressed (D15Wsu75e) mRNA.                                  |
| scd46939.1_10-S       | 0.73             | 1.07           | 1.23            | 0.85               | 0.85             | 1.58              | -0.14            | -0.16          | 0.38            | Prf5          | NM_025737.1   | Mus musculus protein 5 (Prf5) mRNA.                                                                                    |
| scd46932.19_33S-S     | 0.77             | 1.04           | 1.22            | 0.87               | 0.92             | 1.42              | -0.18            | -0.19          | 0.22            | Rangap1       | NM_011241     | Mus musculus RAN GTPase activating protein 1 (Rangap1) mRNA.                                                           |
| scd46938.9_3-S        | 0.98             | 1.07           | 1.17            | 0.82               | 0.89             | 1.09              | -0.25            | -0.27          | -0.09           | Slc25a17      | NM_011399.1   | Mus musculus solute carrier family 25 (mitochondrial carrier, peroxisomal membrane protein) member 17 (Slc25a17) mRNA. |
| scd46945.2_7_65-S     | 1.03             | 0.94           | 1.10            | 0.84               | 0.94             | 1.17              | -0.29            | 0.00           | 0.09            | 2510038A11Rik | NM_175109.2   | Mus musculus RIKEN cDNA 2510038A11 gene (2510038A11Rik) mRNA.                                                          |
| scd46956.4_124-S      | 0.71             | 1.05           | 1.26            | 0.66               | 0.98             | 1.57              | -0.12            | -0.10          | 0.32            | 1300006C06Rik | NM_028792.1   | Mus musculus RIKEN cDNA 1300006C06 gene (1300006C06Rik) mRNA.                                                          |
| scd46964.12_42S-S     | 1.02             | 1.02           | 1.18            | 0.86               | 0.77             | 1.10              | -0.24            | -0.39          | -0.09           | 4732495E13Rik | NM_128300.4   | Mus musculus RIKEN cDNA 4732495E13 gene (4732495E13Rik) mRNA.                                                          |
| scd46962.5_1_59-S     | 0.95             | 1.07           | 1.16            | 0.87               | 0.90             | 1.09              | -0.13            | -0.25          | -0.08           | Rab4a         | NM_025932.1   | Mus musculus RAB member of RAS oncogene family-like 4 (Rab4a) mRNA.                                                    |
| scd47001.5_47-S       | 0.96             | 1.04           | 1.19            | 0.81               | 0.85             | 1.29              | -0.24            | -0.31          | 0.18            | Tcf2          | NM_025737.1   | Mus musculus transcription factor 2 (Tcf2) mRNA.                                                                       |
| scd47036.7_1_29-S     | 0.94             | 1.08           | 1.19            | 0.85               | 0.78             | 1.17              | -0.14            | -0.47          | -0.01           | Vps28         | NM_025842.1   | Mus musculus vacuolar protein sorting 28 (yeast) (Vps28) mRNA.                                                         |
| scd47037.12_1_89-S    | 1.07             | 1.07           | 1.07            | 0.96               | 0.96             | 0.97              | -0.15            | -0.15          | -0.15           | Slc39a4       | NM_028064.2   | Mus musculus solute carrier family 39 (zinc transporter) member 4 (Slc39a4) mRNA.                                      |
| scd47038.26_1_10-S    | 0.90             | 1.09           | 1.15            | 0.89               | 0.86             | 1.25              | 0.00             | -0.35          | 0.13            | Cpsf1         | NM_053193     | Mus musculus cleavage and polyadenylation specific factor 1 (Cpsf1) mRNA.                                              |
| scd47044.6_24_75-S    | 0.97             | 1.11           | 1.24            | 0.87               | 0.85             | 1.16              | -0.15            | -0.38          | -0.01           | 0610041B22Rik | NM_025340.1   | Mus musculus RIKEN cDNA 0610041B22 gene (0610041B22Rik) mRNA.                                                          |
| scd47056.10_1_17-S    | 0.98             | 1.05           | 1.09            | 0.94               | 0.81             | 1.10              | -0.06            | -0.38          | 0.01            | Tata3         | NM_031201.1   | Mus musculus tissue specific transplantation antigen P35B (Tata3) mRNA.                                                |
| scd47133.29_179-S     | 0.75             | 1.19           | 1.20            | 0.68               | 0.93             | 1.16              | -0.14            | -0.35          | -0.05           | Ddef1         | NM_010026.1   | Mus musculus development and differentiation enhancing (Ddef1) mRNA.                                                   |
| scd47326.13_2_23-S    | 0.95             | 1.05           | 1.19            | 0.77               | 0.85             | 1.08              | -0.30            | -0.30          | -0.14           | Cof5          | NM_007637.1   | Mus musculus chaperonin subunit 5 (epselon) (Cof5) mRNA.                                                               |
| scd47523.9_497-S      | 0.99             | 1.06           | 1.45            | 0.84               | 0.71             | 1.40              | -0.23            | -0.58          | -0.05           | Gpd1          | NM_010271.2   | Mus musculus glycerol-3-phosphate dehydrogenase 1 (soluble) (Gpd1) mRNA.                                               |
| scd47524.3_1_1-S      | 0.99             | 1.01           | 1.30            | 0.81               | 0.84             | 1.20              | -0.31            | -0.27          | -0.11           | 2310016M24Rik | NM_183256.1   | Mus musculus RIKEN cDNA 2310016M24 gene (2310016M24Rik) mRNA.                                                          |
| scd47531.14_82-S      | 0.97             | 1.02           | 1.15            | 0.90               | 0.79             | 1.16              | -0.11            | -0.37          | 0.02            | Tegf          | NM_026669.2   | Mus musculus testis enhanced gene transcript (Tegf) mRNA.                                                              |
| scd47561.6_103-S      | 0.91             | 1.07           | 1.44            | 0.79               | 0.86             | 1.45              | -0.20            | -0.31          | 0.01            | 4930570C03Rik | NM_026353.2   | Mus musculus RIKEN cDNA 4930570C03 gene (4930570C03Rik) mRNA.                                                          |
| scd47657.13_70_30-S   | 1.18             | 1.02           | 1.11            | 0.96               | 0.86             | 0.93              | -0.32            | -0.24          | -0.27           | Sca10         | NM_016843     | Mus musculus spinocerebellar ataxia 10 homolog (human) (Sca10) mRNA.                                                   |
| scd47757.5_8_11-S     | 1.40             | 0.92           | 1.15            | 1.06               | 0.79             | 0.96              | -0.42            | -0.23          | -0.27           | Lgals1        | NM_008495.1   | Mus musculus lectin galactose binding soluble 1 (Lgals1) mRNA.                                                         |
| scd47736.6_1_30-S     | 0.97             | 1.09           | 1.09            | 0.89               | 0.79             | 0.97              | -0.10            | -0.31          | 0.01            | 0210010G13Rik | NM_027122.2   | Mus musculus RIKEN cDNA 0210010G13 gene (2310010G13Rik) mRNA.                                                          |
| scd47810.5_374-S      | 0.97             | 1.08           | 1.18            | 0.85               | 0.80             | 1.04              | -0.19            | -0.43          | -0.18           | 1500031N24Rik | NM_128010.4   | Mus musculus RIKEN cDNA 1500031N24 gene (1500031N24Rik) mRNA.                                                          |
| scd47884.11_17_1-S    | 0.67             | 1.01           | 1.17            | 0.65               | 1.01             | 1.51              | -0.05            | -0.01          | 0.37            | Sqle          | NM_009270.2   | Mus musculus squalene epoxidase (Sqle) mRNA.                                                                           |
| scd47965.12_3_6-S     | 0.97             | 1.07           | 1.34            | 0.90               | 0.89             | 1.46              | -0.11            | -0.27          | 0.12            | Atp6v1c1      | NM_025494     | Mus musculus ATPase H+ transporting V1 subunit C isoform 1 (Atp6v1c1) mRNA.                                            |
| scd48085.5_1_13-S     | 0.86             | 1.03           | 1.23            | 0.82               | 0.94             | 1.59              | -0.08            | -0.13          | 0.37            | Rad1          | NM_011232.1   | Mus musculus RAD1 homolog (S. pombe) (Rad1) mRNA.                                                                      |
| scd48137.14_1_1-S     | 0.87             | 1.06           | 1.45            | 0.74               | 0.98             | 1.68              | -0.24            | -0.11          | 0.22            | Oxct1         | NM_024188.3   | Mus musculus ATP synthase H+ transporting mitochondrial F1 complex O subunit (Atp5o) mRNA.                             |
| scd48200.7_1_9-S      | 0.91             | 1.10           | 1.23            | 0.75               | 0.92             | 1.34              | -0.27            | -0.25          | 0.13            | Altp5o        | NM_138597     | Mus musculus ATP synthase H+ transporting mitochondrial F1 complex O subunit (Atp5o) mRNA.                             |
| scd48225.31_410-S     | 0.97             | 1.09           | 1.09            | 0.87               | 0.83             | 1.03              | -0.10            | -0.40          | -0.01           | Tiam1         | NM_028411     | Mus musculus T-cell lymphoma invasion and metastasis 1 (Tiam1) mRNA.                                                   |
| scd4837.8_7_6-S       | 0.98             | 1.07           | 1.15            | 0.81               | 0.91             | 1.27              | -0.27            | -0.23          | 0.13            | Nir2          | NM_023175.1   | Mus musculus T-cell lymphoma invasion and metastasis 1 (Tiam1) mRNA.                                                   |
| scd48382.9_267-S      | 0.96             | 1.04           | 1.17            | 0.82               | 0.86             | 1.33              | -0.23            | -0.27          | 0.18            | Ttp           | NM_019678     | Mus musculus Ttk-fused gene (Ttp) mRNA.                                                                                |
| scd48385.2_92-S       | 0.91             | 1.06           | 1.40            | 0.76               | 0.85             | 1.34              | -0.26            | -0.32          | -0.05           | Rgmd1         | NM_029092.1   | Mus musculus RNA (guanine-9-) methyltransferase domain containing 1 (Rgmd1) mRNA.                                      |
| scd48463.11_73-S      | 0.90             | 1.08           | 1.12            | 0.83               | 0.84             | 1.17              | -0.13            | -0.36          | 0.06            | Qlnd1         | NM_148491.1   | Mus musculus RNA (guanine-9-) methyltransferase domain containing 1 (Rgmd1) mRNA.                                      |
| scd48494.5_274-S      | 1.01             | 1.01           | 1.31            | 0.84               | 0.90             | 1.30              | -0.26            | -0.17          | -0.01           | Glt2e1        | NM_028812.1   | Mus musculus general transcription factor II E polypeptide 1 (alpha subunit) (Glt2e1) mRNA.                            |
| scd48501.9_64S-S      | 1.06             | 0.93           | 1.21            | 0.87               | 0.67             | 1.07              | -0.28            | -0.46          | -0.18           | Cd86          | NM_019388.2   | Mus musculus CD86 antigen (CD86) mRNA.                                                                                 |
| scd48556.8_1_19-S     | 0.98             | 1.11           | 1.23            | 0.86               | 0.82             | 1.22              | -0.19            | -0.42          | -0.01           | 2010319C14Rik | NM_027448.2   | Mus musculus RIKEN cDNA 2010319C14 gene (2010319C14Rik) mRNA.                                                          |
| scd48625.9_280-S      | 0.94             | 1.14           | 1.21            | 0.69               | 0.81             | 1.31              | -0.26            | -0.23          | 0.01            | 2010319C14Rik | NM_027448.2   | Mus musculus B-cell leukemia/lymphoma 6 (Bcl6) mRNA.                                                                   |
| scd48676.4_117-S      | 0.91             | 1.02           | 1.26            | 0.80               | 0.92             | 1.54              | -0.19            | -0.14          | 0.28            | Mpr40         | NM_010922.1   | Mus musculus mitochondrial ribosomal protein L40 (Mpr40) mRNA.                                                         |
| scd48709.7_108-S      | 0.92             | 1.07           | 1.24            | 0.83               | 0.91             | 1.32              | -0.14            | -0.23          | 0.09            | Ube23         | NM_148568     | Mus musculus ubiquitin-conjugating enzyme E2L 3 (Ube23) mRNA.                                                          |
| scd48729.15_1_120-S   | 0.69             | 1.04           | 1.17            | 0.57               | 1.02             | 1.45              | -0.27            | -0.02          | 0.32            | Mcm4          | NM_005655.2   | Mus musculus minichromosome maintenance deficient 4 homolog (S. cerevisiae) (Mcm4) mRNA.                               |
| scd48742.24_1_21-S    | 0.93             | 1.04           | 1.09            | 0.94               | 0.79             | 1.17              | -0.02            | -0.40          | 0.10            | Pam           | NM_148364.1   | Mus musculus poly(A)-specific ribonuclease (deadenylation nuclease) (Pam) mRNA.                                        |
| scd48750.6_548-S      | 0.99             | 1.01           | 1.17            | 0.90               | 0.84             | 1.29              | -0.13            | -0.26          | 0.14            | C530044N13Rik | NM_148607     | Mus musculus RIKEN cDNA C530044N13 gene (C530044N13Rik) mRNA.                                                          |
| scd48775.5_26S-S      | 1.17             | 0.98           | 1.13            | 0.93               | 0.72             | 1.07              | -0.32            | -0.46          | -0.08           | Emp2          | NM_007925.1   | Mus musculus epithelial membrane protein 2 (Emp2) mRNA.                                                                |
| scd48780.9_1_54-S     | 1.05             | 1.03           | 1.18            | 0.83               | 0.76             | 0.98              | -0.37            | -0.26          | -0.08           | Nagpa         | NM_026333.1   | Mus musculus epidermal growth factor receptor alpha N-acetylglucosaminidase (Nagpa) mRNA.                              |
| scd48804.7_78_52-S    | 1.05             | 1.11           | 1.25            | 0.64               | 0.95             | 1.17              | -0.22            | -0.23          | -0.09           | 1110025F24Rik | NM_026333.1   | Mus musculus RIKEN cDNA 1110025F24 gene (1110025F24Rik) mRNA.                                                          |
| scd48818.18_1_43-S    | 0.96             | 1.02           | 1.19            | 0.84               | 0.88             | 1.17              | -0.19            | -0.21          | -0.03           | Trap1         | NM_026508.1   | Mus musculus RNA (guanine-9-) methyltransferase domain containing 1 (Rgmd1) mRNA.                                      |
| scd48821.4_3-S        | 0.82             | 1.07           | 1.18            | 0.71               | 0.94             | 1.35              | -0.22            | -0.19          | 0.20            | Btbd12        | NM_177472.3   | Mus musculus RNA (guanine-9-) methyltransferase domain containing 1 (Rgmd1) mRNA.                                      |
| scd48911.16_3_18-S    | 0.92             | 1.06           | 1.28            | 0.86               | 0.94             | 1.36              | -0.08            | -0.16          | 0.09            | Usp16         | NM_024258.1   | Mus musculus ubiquitin specific protease 16 (Usp16) mRNA.                                                              |
| scd48912.5_69-S       | 1.05             | 1.02           | 1.12            | 0.94               | 0.83             | 1.01              | -0.16            | -0.31          | -0.15           | 5830445C04Rik | NM_026366.1   | Mus musculus RIKEN cDNA 5830445C04 gene (5830445C04Rik) mRNA.                                                          |
| scd49002.15_178-S     | 1.03             | 1.05           | 1.20            | 0.95               | 0.81             | 1.24              | -0.11            | -0.36          | 0.06            | Pro1          | NM_011731.3   | Mus musculus protein S (alpha) (Pro1) mRNA.                                                                            |
| scd49010.5_349-S      | 0.87             | 1.07           | 1.24            | 0.77               | 0.87             | 1.24              | -0.17            | -0.23          | 0.12            | 1110019C08Rik | NM_026402.1   | Mus musculus RIKEN cDNA 1110019C08 gene (1110019C08Rik) mRNA.                                                          |
| scd49055.9_1_50-S     | 0.99             | 1.02           | 1.36            | 0.86               | 0.87             | 1.36              | -0.22            | -0.22          | 0.01            | Apd3          | NM_026402.1   | Mus musculus RIKEN cDNA 1110025F24 gene (1110025F24Rik) mRNA.                                                          |
| scd49146.12_1_4-S     | 1.06             | 0.99           | 1.08            | 0.85               | 0.88             | 1.06              | -0.31            | -0.17          | -0.02           | 2610033C09Rik | NM_026407.2   | Mus musculus RIKEN cDNA 2610033C09 gene (2610033C09Rik) mRNA.                                                          |
| scd49200.44_268_9-S   | 1.04             | 1.05           | 1.15            | 0.80               | 0.83             | 1.12              | -0.37            | -0.34          | -0.04           | Myk           | NM_139300     | Mus musculus myosin light polypeptide kinase (Myk) mRNA.                                                               |
| scd49245.4_458-S      | 0.99             | 1.05           | 1.05            | 0.95               | 0.89             | 1.03              | -0.05            | -0.23          | -0.03           | 1500031L02Rik | NM_025892.1   | Mus musculus RIKEN cDNA 1500031L02 gene (1500031L02Rik) mRNA.                                                          |
| scd49316.10_1_12-S    | 0.97             | 0.98           | 1.14            | 0.86               | 0.80             | 1.33              | -0.17            | -0.29          | 0.22            | Dnab11        | NM_148071.1   | Mus musculus DnaJ (Hsp40) homolog subfamily B member 11 (Dnab11) mRNA.                                                 |
| scd49343.16_24_43-S   | 0.91             | 1.04           | 1.23            | 0.85               | 0.88             | 1.39              | -0.09            | -0.25          | -0.18           | Eif2b5        | NM_172265.1   | Mus musculus eukaryotic translation initiation factor 2B subunit 5 epsilon (Eif2b5) mRNA.                              |
| scd49378.5_4174-S     | 0.91             | 1.04           | 1.23            | 0.87               | 0.80             | 1.23              | -0.16            | -0.34          | 0.05            | Smad3         | NM_023439.3   | Mus musculus transforming growth factor-beta3 (Tgfb3) mRNA.                                                            |
| scd49387.17_1_22-S    | 0.94             | 1.04           | 1.09            | 0.80               | 0.96             | 1.13              | -0.23            | -0.12          | 0.08            | Tcp2b         | NM_011624.2   | Mus musculus topoisomerase (DNA) II beta (Tcp2b) mRNA.                                                                 |
| scd49440.8_1_1-S      | 0.95             | 1.03           | 1.07            | 0.90               | 0.77             | 1.06              | -0.08            | -0.43          | -0.02           | Nubp1         | NM_011955.1   | Mus musculus nucleotide binding protein 1 (Nubp1) mRNA.                                                                |
| scd49474.3_50-S       | 1.06             | 1.10           | 1.19            | 0.89               | 0.82             | 1.02              | -0.25            | -0.42          | -0.22           | 1110001K21Rik | NM_025839.1   | Mus musculus RIKEN cDNA 1110001K21 gene (1110001K21Rik) mRNA.                                                          |
| scd49529.6_1_149-S    | 1.02             | 1.05           | 1.23            | 0.88               | 0.88             | 1.47              | -0.22            | -0.25          | 0.27            | Pgf           | NM_008388.1   | Mus musculus phosphatidylinositol glycan class F (Pgf) mRNA.                                                           |
| scd49542.15_45-S      | 1.00             | 1.05           | 0.97            | 0.94               | 0.84             | 1.12              | -0.08            | -0.32          | 0.21            | D030028O16Rik | NM_145984.2   | Mus musculus RIKEN cDNA D030028O16 gene (D030028O16Rik) mRNA.                                                          |
| scd49587.9_193-S      | 0.86             | 1.11           | 1.20            | 0.70               | 0.93             | 1.41              | -0.30            | -0.25          | 0.24            | Sfr7          | NM_146083.1   | Mus musculus splicing factor arginine/serine-rich 7 (Sfr7) mRNA.                                                       |
| scd49590.13_9_9-S     | 0.81             | 1.06           | 1.25            | 0.63               | 0.97             | 1.56              | -0.35            | -0.14          | 0.34            | 2810036L13Rik | NM_144802.2   | Mus musculus RIKEN cDNA 2810036L13 gene (2810036L13Rik) mRNA.                                                          |
| scd49605.16_306-S     | 0.91             | 1.08           | 1.25            | 0.79               | 0.87             | 1.16              | -0.21            | -0.31          | 0.10            | Prkr          | NM_011632.2   | Mus musculus protein kinase interferon-inducible double stranded RNA dependent (Prkr) mRNA.                            |
| scd49651.7_46-S       | 0.95             | 1.20           | 1.39            | 0.86               | 0.78             | 1.30              | -0.14            | -0.61          | -0.09           | Tgf           | NM_009372.2   | Mus musculus TG interacting factor (Tgf) mRNA.                                                                         |
| scd49695.8_112-S      | 1.01             | 1.01           | 1.21            | 0.85               | 0.83             | 1.12              | -0.25            | -0.28          | -0.10           | Vapa          | NM_013933.2   | Mus musculus vesicle-associated membrane protein associated protein A (Vapa) mRNA.                                     |
| scd49743.39_1_15-S    | 1.22             | 0.98           | 1.11            | 0.97               | 0.71             | 0.97              | -0.33            | -0.45          | -0.18           | C3            | NM_009778.1   | Mus musculus complement component 3 (C3) mRNA.                                                                         |
| scd49772.19_1740_17-S | 1.16             | 1.11           | 0.99            | 1.09               | 0.85             | 0.92              | -0.10            | -0.38          | -0.11           | Sema6b        | NM_013662     | Mus musculus sema domain transmembrane domain (TM) and cytoplasmic domain (semaphorin) 6B (Sema6b) mRNA.               |
| scd49857.14_1_9-S     | 0.88             | 1.21           | 1.20            | 0.82               | 0.85             | 1.41              | -0.09            | -0.52          | -0.04           | Khhcd3        | NM_027910.1   | Mus musculus kelch domain containing 3 (Khhcd3) mRNA.                                                                  |
| scd49959.1_79-S       | 0.75             | 0.87           | 1.19            | 0.62               | 1.05             | 1.51              | -0.27            | -0.11          | 0.34            | 2610528M18Rik | NM_026333.1   | Mus musculus RIKEN cDNA 2610528M18 gene (2610528M18Rik) mRNA.                                                          |
| scd49975.4_297_19-S   | 0.86             | 0.93           | 1.21            | 0.71               | 0.89             | 1.69              | -0.28            | -0.23          | 0.10            | Tub5          | NM_011855.2</ |                                                                                                                        |

| Gene Name            | Control<br>18 Hours | Control<br>1 Week | Control<br>4 Weeks | Treatment<br>18 Hours | Treatment<br>1 Week | Treatment<br>4 Weeks | Log2 FC<br>18 Hours | Log2 FC<br>1 Week | Log2 FC<br>4 Weeks | Symbol        | Accession   | Definition                                                                                                            |
|----------------------|---------------------|-------------------|--------------------|-----------------------|---------------------|----------------------|---------------------|-------------------|--------------------|---------------|-------------|-----------------------------------------------------------------------------------------------------------------------|
| sd50803.29.1.3-S     | 1.10                | 1.11              | 1.18               | 0.92                  | 0.73                | 0.99                 | -0.25               | -0.59             | -0.25              | Bat8          | NM_147151.1 | Mus musculus HLA-B associated transcript 8 (Bat8) transcript variant long mRNA.                                       |
| sd50867.7.31-S       | 0.99                | 1.03              | 1.28               | 0.85                  | 0.79                | 1.18                 | -0.22               | -0.38             | -0.11              | Tex27         | NM_148956.1 | Mus musculus testis expressed gene 27 (Tex27) mRNA.                                                                   |
| sd50935.5.66-S       | 1.03                | 1.14              | 1.15               | 0.89                  | 0.73                | 1.06                 | -0.21               | -0.65             | -0.09              | Hnga1a        | NM_016660.1 | Mus musculus high mobility group AT-hook 1 (Hnga1a) mRNA.                                                             |
| sd50948.6.850.26-S   | 0.99                | 1.09              | 1.37               | 0.78                  | 0.91                | 1.57                 | -0.19               | -0.26             | 0.20               | Atp6v6e       | NM_025272.1 | Mus musculus ATPase H+ transporting V0 subunit (Atp6v6e) mRNA.                                                        |
| sd50981.11.474-S     | 0.97                | 1.11              | 1.35               | 0.81                  | 0.93                | 1.35                 | -0.38               | -0.23             | 0.31               | Atad2         | NM_128514.4 | Mus musculus adenosine receptor beta 2 (Atad2) mRNA.                                                                  |
| sd50983.5.1.38-S     | 0.88                | 1.09              | 1.31               | 0.70                  | 0.97                | 1.53                 | -0.33               | -0.18             | 0.23               | Mpr28         | NM_024227.2 | Mus musculus mitochondrial ribosomal protein L28 (Mpr28) nuclear gene encoding mitochondrial protein mRNA.            |
| sd51015.5.49.29-S    | 0.84                | 1.01              | 1.14               | 0.89                  | 0.97                | 1.39                 | -0.29               | -0.06             | 0.29               | Dcl1          | NM_010023.2 | Mus musculus dodecenoyl-Coenzyme A delta isomerase (32 trans-enoyl-Coenzyme A isomerase) (Dcl1) mRNA.                 |
| sd51099.14.176-S     | 1.02                | 1.00              | 1.31               | 0.89                  | 0.79                | 1.42                 | -0.19               | -0.34             | 0.12               | Smoc2         | NM_022315.1 | Mus musculus SPARC related modular calcium binding 2 (Smoc2) mRNA.                                                    |
| sd51111.10.24.24-S   | 0.80                | 1.07              | 1.27               | 0.68                  | 0.94                | 1.66                 | -0.24               | -0.19             | 0.39               | Tcp1          | NM_013686.1 | Mus musculus t-complex protein 1 (Tcp1) mRNA.                                                                         |
| sd51225.7.1.1-S      | 0.92                | 1.01              | 1.15               | 0.82                  | 0.76                | 1.17                 | -0.18               | -0.40             | 0.03               | 1110032A13Rik | NM_199171.1 | Mus musculus RIKEN cDNA 1110032A13 gene (1110032A13Rik) mRNA.                                                         |
| sd51243.10.1.19-S    | 0.88                | 1.00              | 1.10               | 0.90                  | 0.99                | 1.39                 | -0.04               | -0.01             | 0.34               | Sic14a1       | NM_028122.2 | Mus musculus solute carrier family 14 (urea transporter) member 1 (Sic14a1) mRNA.                                     |
| sd51352.1.37.3-S     | 0.81                | 1.10              | 1.26               | 0.79                  | 0.83                | 1.75                 | -0.17               | -0.23             | 0.17               | Adrb2         | NM_027430.2 | Mus musculus adrenergic receptor beta 2 (Adrb2) mRNA.                                                                 |
| sd51434.4.1.16-S     | 0.93                | 1.05              | 1.21               | 0.81                  | 0.92                | 1.17                 | -0.19               | -0.19             | -0.04              | Fem1c         | NM_173423.1 | Mus musculus fem-1 homolog c (C.elegans) (Fem1c) mRNA.                                                                |
| sd51485.9.146-S      | 1.05                | 0.93              | 1.22               | 0.88                  | 0.95                | 1.38                 | -0.26               | 0.05              | 0.18               | Fgf1          | NM_010197.2 | Mus musculus fibroblast growth factor 1 (Fgf1) mRNA.                                                                  |
| sd51494.33.412-S     | 1.13                | 1.08              | 1.01               | 0.98                  | 0.89                | 0.98                 | -0.21               | -0.28             | -0.04              | E030006K04Rik | NM_139206.1 | Mus musculus RIKEN cDNA E030006K04 gene (E030006K04Rik) mRNA.                                                         |
| sd51536.11.7-S       | 0.98                | 1.04              | 1.19               | 0.88                  | 0.86                | 1.34                 | -0.15               | -0.28             | 0.19               | Erf1          | NM_144866.2 | Mus musculus eukaryotic translation termination factor 1 (Erf1) mRNA.                                                 |
| sd51735.42.647.134-S | 0.93                | 1.11              | 1.24               | 0.82                  | 0.87                | 1.15                 | -0.17               | -0.35             | -0.09              | 5430411K18Rik | NM_140491.4 | Mus musculus RIKEN cDNA 5430411K18 gene (5430411K18Rik) mRNA.                                                         |
| sd51768.11.1.9-S     | 0.99                | 1.06              | 1.12               | 0.82                  | 0.79                | 1.12                 | -0.27               | -0.42             | 0.01               | Acaa2         | NM_177470.2 | Mus musculus acetyl-Coenzyme A acyltransferase 2 (mitochondrial 3-oxoacyl-Coenzyme A thiolase) (Acaa2) mRNA.          |
| sd51774.11.3.64-S    | 0.93                | 1.08              | 1.19               | 0.83                  | 0.95                | 1.35                 | -0.16               | -0.17             | 0.20               | Cox1          | NM_028988.1 | Mus musculus COX2 finger 1 (P08) domain (Cox1) mRNA.                                                                  |
| sd51816.20.1.8-S     | 0.93                | 1.02              | 1.33               | 0.74                  | 0.80                | 1.15                 | -0.34               | -0.35             | -0.20              | 4631422C13Rik | NM_128857.3 | Mus musculus RIKEN cDNA 4631422C13 gene (4631422C13Rik) mRNA.                                                         |
| sd51863.38.476-S     | 0.96                | 1.15              | 1.23               | 0.85                  | 0.92                | 1.11                 | -0.18               | -0.31             | -0.14              | Wdr7          | NM_140391.3 | Mus musculus WD repeat domain 7 (Wdr7) mRNA.                                                                          |
| sd51888.24.434-S     | 1.23                | 1.06              | 1.07               | 0.97                  | 0.77                | 0.91                 | -0.33               | -0.44             | -0.24              | Pdgfrb        | NM_008809.1 | Mus musculus platelet derived growth factor receptor beta polypeptide (Pdgfrb) mRNA.                                  |
| sd51927.6.1.20-S     | 0.97                | 1.08              | 1.25               | 0.86                  | 0.90                | 1.25                 | -0.16               | -0.24             | 0.00               | Phax          | NM_019996.2 | Mus musculus phosphorylated adaptor for RNA export (Phax) mRNA.                                                       |
| sd51946.9.43.22-S    | 1.07                | 0.97              | 1.31               | 0.91                  | 0.67                | 1.22                 | -0.22               | -0.52             | -0.10              | Smx24         | NM_029394.2 | Mus musculus sorting nexin 24 (Smx24) mRNA.                                                                           |
| sd51958.8.1.0-S      | 1.06                | 0.97              | 1.21               | 0.87                  | 0.86                | 1.08                 | -0.28               | -0.16             | -0.16              | 2810036K01Rik | NM_026040.2 | Mus musculus RIKEN cDNA 2810036K01 gene (2810036K01Rik) mRNA.                                                         |
| sd51985.8.440-S      | 0.93                | 1.01              | 1.25               | 0.84                  | 0.76                | 1.16                 | -0.14               | -0.22             | 0.00               | Commd10       | NM_178377.3 | Mus musculus COMMD domain containing 10 (Commd10) mRNA.                                                               |
| sd52002.9.1.8-S      | 0.94                | 1.09              | 1.09               | 0.79                  | 0.98                | 1.36                 | -0.07               | -0.09             | 0.32               | 2410015B03Rik | NM_029022.2 | Mus musculus RIKEN cDNA 2410015B03 gene (2410015B03Rik) mRNA.                                                         |
| sd52158.26.1.1-S     | 0.98                | 1.12              | 1.24               | 0.86                  | 0.89                | 1.23                 | -0.21               | -0.32             | -0.01              | Plk3c3        | NM_181414.3 | Mus musculus phosphoinositide 3-kinase class 3 (Plk3c3) mRNA.                                                         |
| sd52206.9.527-S      | 0.96                | 1.04              | 1.14               | 0.88                  | 0.74                | 1.06                 | -0.13               | -0.49             | -0.09              | Rnf138        | NM_019706.2 | Mus musculus ring finger protein 138 (Rnf138) transcript variant 2 mRNA.                                              |
| sd52252.1.58.3-S     | 0.84                | 1.03              | 1.30               | 0.76                  | 0.99                | 1.70                 | -0.16               | -0.06             | 0.38               | Snrpd1        | NM_009226.2 | Mus musculus small nuclear ribonucleoprotein D1 (Snrpd1) mRNA.                                                        |
| sd52314.6.1.5-S      | 0.70                | 0.93              | 1.26               | 0.58                  | 1.05                | 1.54                 | -0.29               | -0.19             | 0.29               | Prdx3         | NM_007452.1 | Mus musculus peroxiredoxin 3 (Prdx3) mRNA.                                                                            |
| sd52316.14.1.45-S    | 0.89                | 1.00              | 1.05               | 0.90                  | 1.04                | 1.22                 | -0.02               | 0.05              | 0.21               | Shn4          | NM_053198   | Mus musculus sideroflexin 4 (Shn4) mRNA.                                                                              |
| sd52400.33.10-S      | 0.93                | 1.03              | 1.18               | 0.92                  | 0.87                | 1.33                 | -0.00               | -0.24             | 0.01               | Ar2           | NM_019718.2 | Mus musculus ADP-ribosylation factor-like 2 (Ar2) mRNA.                                                               |
| sd52435.3.1.22-S     | 0.91                | 1.03              | 1.22               | 0.83                  | 0.91                | 1.40                 | -0.26               | -0.27             | 0.14               | Mmp43         | NM_055042.2 | Mus musculus mitochondrial ribosomal protein L43 (Mmp43) nuclear gene encoding mitochondrial protein mRNA.            |
| sd52453.11.571-S     | 1.07                | 1.10              | 1.04               | 0.87                  | 0.85                | 1.04                 | -0.30               | -0.37             | 0.00               | Kep4          | NM_145502.2 | Mus musculus similar to Caenorhabditis elegans protein C42C1.9 (Kep4) mRNA.                                           |
| sd52515.14.1.211-S   | 1.01                | 1.00              | 1.18               | 0.89                  | 0.69                | 1.07                 | -0.19               | -0.55             | -0.13              | 5730455O13Rik | NM_129261.5 | Mus musculus RIKEN cDNA 5730455O13 gene (5730455O13Rik) mRNA.                                                         |
| sd52537.9.567-S      | 0.96                | 1.04              | 1.47               | 0.74                  | 0.72                | 1.27                 | -0.39               | -0.52             | -0.21              | Lip1          | NM_021460.1 | Mus musculus lysosomal acid lipase 1 (Lip1) mRNA.                                                                     |
| sd52553.25.587-S     | 0.99                | 1.04              | 1.21               | 0.89                  | 0.87                | 1.14                 | -0.15               | -0.26             | -0.08              | Asah2         | NM_018830.1 | Mus musculus N-acylsphingosine amidohydrolase 2 (Asah2) mRNA.                                                         |
| sd52590.16.341-S     | 0.91                | 1.09              | 1.23               | 0.79                  | 0.83                | 1.20                 | -0.21               | -0.40             | -0.04              | D19Wsu12e     | NM_358328.1 | Mus musculus DNA segment Chr 19 Wayne State University 12 expressed (D19Wsu12e) mRNA.                                 |
| sd52628.17.1.63-S    | 0.95                | 1.03              | 1.13               | 0.76                  | 0.92                | 1.28                 | -0.32               | -0.15             | 0.19               | BC018472      | NM_026187.2 | Mus musculus cDNA sequence BC018472 (BC018472) mRNA.                                                                  |
| sd52637.5.4.01.18-S  | 1.02                | 0.94              | 1.15               | 0.83                  | 0.92                | 1.17                 | -0.30               | -0.38             | 0.01               | Ca11          | NM_017375.1 | Mus musculus osteocalcin stimulating factor 1 (Ca11) mRNA.                                                            |
| sd52776.8.1.198-S    | 0.98                | 1.07              | 1.30               | 0.84                  | 0.81                | 1.26                 | -0.22               | -0.40             | -0.04              | P2g2n         | NM_026329.1 | Mus musculus polymerase (RNA) I (DNA directed) polypeptide G (P2g2n) mRNA.                                            |
| sd52780.10.0-S       | 1.01                | 0.96              | 1.43               | 0.82                  | 0.83                | 1.29                 | -0.30               | -0.20             | -0.15              | Sic3a2        | NM_008577.2 | Mus musculus solute carrier family 3 (activators of dibasic and neutral amino acid transport) member 2 (Sic3a2) mRNA. |
| sd52790.5.512-S      | 0.99                | 1.04              | 1.11               | 0.83                  | 0.93                | 1.31                 | -0.26               | -0.15             | 0.24               | 1810055G02Rik | NM_028077.1 | Mus musculus RIKEN cDNA 1810055G02 gene (1810055G02Rik) mRNA.                                                         |
| sd52839.2.29-S       | 0.96                | 1.10              | 1.18               | 0.92                  | 0.84                | 1.18                 | -0.06               | -0.37             | 0.00               | Ai837181      | NM_134149.1 | Mus musculus expressed sequence Ai837181 (Ai837181) mRNA.                                                             |
| sd52843.9.1.76-S     | 1.18                | 0.92              | 1.06               | 1.01                  | 0.73                | 0.97                 | -0.24               | -0.33             | -0.13              | Elmp2         | NM_021474.2 | Mus musculus epidermal growth factor-containing fibulin-like extracellular matrix protein 2 (Elmp2) mRNA.             |
| sd52902.14.1.38-S    | 0.79                | 1.07              | 1.13               | 0.62                  | 1.00                | 1.91                 | -0.33               | -0.09             | 0.75               | Slp1          | NM_016737.1 | Mus musculus stress-induced phosphoprotein 1 (Slp1) mRNA.                                                             |
| sd52906.7.1.118-S    | 0.90                | 1.15              | 1.46               | 0.74                  | 0.85                | 1.74                 | -0.28               | -0.14             | 0.15               | Vezfb         | NM_016871.1 | Mus musculus vesicular endothelial growth factor B (Vezfb) mRNA.                                                      |
| sd52908.26.6.30-S    | 1.02                | 1.10              | 1.17               | 0.84                  | 0.81                | 1.02                 | -0.28               | -0.42             | -0.18              | 2610041P08Rik | NM_198008.1 | Mus musculus RIKEN cDNA 2610041P08 gene (2610041P08Rik) mRNA.                                                         |
| sd52914.17.1.108-S   | 1.04                | 1.02              | 1.12               | 0.95                  | 0.79                | 1.00                 | -0.14               | -0.38             | -0.16              | Rps8ka4       | NM_019924.1 | Mus musculus ribosomal protein S6 kinase polypeptide 4 (Rps8ka4) mRNA.                                                |
| sd53028.7.562-S      | 1.00                | 1.04              | 1.23               | 0.89                  | 0.85                | 1.13                 | -0.16               | -0.29             | -0.12              | Trim8         | NM_053100.1 | Mus musculus tripartite motif protein 8 (Trim8) mRNA.                                                                 |
| sd53077.5.8.20-S     | 1.02                | 0.94              | 1.34               | 0.83                  | 0.69                | 1.42                 | -0.30               | -0.46             | 0.09               | Gsto1         | NM_010362.1 | Mus musculus glutathione S-transferase omega 1 (Gsto1) mRNA.                                                          |
| sd53104.2.253-S      | 1.02                | 1.05              | 1.28               | 0.94                  | 0.73                | 1.19                 | -0.12               | -0.50             | -0.10              | Nkx2-3        | NM_129268.4 | Mus musculus NK2 transcription factor related locus 3 (Drosophila) (Nkx2-3) mRNA.                                     |
| sd53158.2.336-S      | 0.84                | 1.05              | 1.21               | 0.79                  | 0.99                | 1.39                 | -0.09               | -0.09             | 0.21               | Tmem20        | NM_175507.2 | Mus musculus transmembrane protein 20 (Tmem20) mRNA.                                                                  |
| sd53163.10.1.04-S    | 1.19                | 1.10              | 1.09               | 0.86                  | 0.98                | 1.08                 | -0.06               | -0.30             | 0.03               | 1200080C12Rik | NM_038708.1 | Mus musculus RIKEN cDNA 1200080C12 gene (1200080C12Rik) mRNA.                                                         |
| sd53198.10.9.45-S    | 0.93                | 1.01              | 1.20               | 0.76                  | 1.00                | 1.50                 | -0.26               | -0.01             | 0.32               | Rp30          | NM_019428.2 | Mus musculus ribonuclease P-MRP 30kDa subunit (mRNA) (Rp30) mRNA.                                                     |
| sd53217.16.138.16-S  | 0.88                | 0.93              | 1.12               | 0.81                  | 0.99                | 1.44                 | -0.12               | 0.23              | 0.37               | Uhrf2         | NM_144873.1 | Mus musculus ubiquitin-like containing PHD and RING finger domains 2 (Uhrf2) mRNA.                                    |
| sd53234.12.152-S     | 0.97                | 1.03              | 1.24               | 0.85                  | 0.94                | 1.53                 | -0.19               | -0.14             | 0.31               | Rc1t          | NM_021525.2 | Mus musculus RNA terminal phosphate cyclase-like 1 (Rc1t) mRNA.                                                       |
| sd53274.2.128-S      | 0.98                | 0.96              | 1.06               | 0.98                  | 0.60                | 1.04                 | 0.01                | -0.66             | -0.03              | Bleb1         | NM_010638.2 | Mus musculus basic transcription element binding protein 1 (Bleb1) mRNA.                                              |
| sd53341.4.558-S      | 0.87                | 1.07              | 1.26               | 0.75                  | 0.98                | 1.35                 | -0.22               | -0.13             | 0.10               | 4632417K18Rik | NM_026640.1 | Mus musculus RIKEN cDNA 4632417K18 gene (4632417K18Rik) mRNA.                                                         |
| sd53358.2.1.26-S     | 1.49                | 0.91              | 1.10               | 1.07                  | 0.76                | 0.98                 | -0.51               | -0.26             | -0.01              | Msa4ac        | NM_026959   | Mus musculus membrane-spanning 4-domains subfamily A member 6C (Msa4ac) mRNA.                                         |
| sd53366.34.53-S      | 0.93                | 1.04              | 1.34               | 0.81                  | 0.83                | 1.53                 | -0.43               | -0.51             | -0.46              | Sic15a3       | NM_025343.1 | Mus musculus solute carrier family 15 member 3 (Sic15a3) mRNA.                                                        |
| sd53371.28.117-S     | 0.85                | 1.06              | 1.21               | 0.75                  | 0.93                | 1.48                 | -0.18               | -0.18             | -0.30              | Ddb1          | NM_015735.1 | Mus musculus damage specific DNA binding protein 1 (Ddb1) mRNA.                                                       |
| sd53380.11.494-S     | 0.83                | 1.11              | 1.24               | 0.78                  | 0.93                | 1.31                 | -0.10               | -0.25             | 0.09               | Fads1         | NM_146094.1 | Mus musculus fatty acid desaturase 1 (Fads1) mRNA.                                                                    |
| sd53400.8.1.51-S     | 0.87                | 1.09              | 1.24               | 0.72                  | 0.82                | 1.21                 | -0.27               | -0.42             | -0.02              | D19Ertd721e   | NM_146093.1 | Mus musculus DNA segment Chr 19 ERATO Doi 721 expressed (D19Ertd721e) mRNA.                                           |
| sd53403.26.13.76-S   | 1.04                | 1.04              | 1.21               | 0.90                  | 0.79                | 1.21                 | -0.21               | -0.38             | -0.01              | Bcl2l         | NM_008144.3 | Mus musculus Bernardinelli-Seip congenital lipodystrophy 2 homolog (human) (Bcl2l) mRNA.                              |
| sd53435.8.1.0-S      | 0.97                | 1.03              | 1.15               | 0.79                  | 0.82                | 1.16                 | -0.31               | -0.33             | 0.03               | Ndufs8        | NM_144870.2 | Mus musculus NADH dehydrogenase (ubiquinone) Fe-S protein 8 (Ndufs8) mRNA.                                            |
| sd53438.5.1.79-S     | 0.78                | 1.07              | 1.16               | 0.68                  | 0.89                | 1.28                 | -0.19               | -0.27             | 0.14               | Ndufv1        | NM_133666.1 | Mus musculus NADH dehydrogenase (ubiquinone) flavoprotein 1 (Ndufv1) mRNA.                                            |
| sd53441.8.1.144-S    | 0.87                | 1.15              | 1.18               | 0.80                  | 0.86                | 1.25                 | -0.13               | -0.42             | 0.11               | Ap1           | NM_016666   | Mus musculus aryl hydrocarbon receptor-interacting protein (Ap1) mRNA.                                                |
| sd53474.8.1.75-S     | 0.88                | 1.08              | 1.27               | 0.77                  | 0.87                | 1.25                 | -0.21               | -0.32             | 0.03               | Ccs           | NM_016892.2 | Mus musculus copper chaperone for superoxide dismutase (Ccs) mRNA.                                                    |
| sd53487.20.1.122-S   | 0.91                | 1.09              | 1.23               | 0.84                  | 0.87                | 1.41                 | -0.13               | -0.33             | 0.21               | Sl3b2         | NM_030109.1 | Mus musculus splicing factor 3b subunit 2 (Sl3b2) mRNA.                                                               |
| sd53489.23.479-S     | 0.87                | 1.07              | 1.26               | 0.78                  | 0.87                | 1.38                 | -0.16               | -0.30             | 0.15               | Pacs1         | NM_028345.1 | Mus musculus phosphatidylinositol acidic cluster sorting protein 1 (Pacs1) mRNA.                                      |
| sd53492.15.1.3-S     | 0.99                | 1.16              | 1.11               | 0.88                  | 0.86                | 1.03                 | -0.15               | -0.43             | -0.12              | Sart1         | NM_016882.2 | Mus musculus squamous cell carcinoma antigen recognized by T-cells 1 (Sart1) mRNA.                                    |
| sd53495.6.1.70-S     | 0.96                | 1.04              | 1.30               | 0.90                  | 0.77                | 1.24                 | -0.13               | -0.43             | -0.08              | Drp1          | NM_024176.1 | Mus musculus Dr1 associated protein 1 (negative cofactor 2 alpha) (Drp1) mRNA.                                        |
| sd53524.2.2.2-S      | 0.90                | 0.90              | 1.07               | 0.85                  | 0.99                | 1.44                 | -0.08               | -0.15             | 0.43               | Mpi49         | NM_026461.1 | Mus musculus mitochondrial ribosomal protein L49 (Mpi49) mRNA.                                                        |
| sd53528.4.1.29-S     | 0.93                | 1.05              | 1.22               | 0.84                  | 0.80                | 1.13                 | -0.14               | -0.22             | -0.11              | Ar2           | NM_019722.2 | Mus musculus ADP-ribosylation factor-like 2 (Ar2) mRNA.                                                               |
| sd53543.5.129.30-S   | 0.93                | 1.03              | 1.09               | 0.80                  | 0.90                | 1.27                 | -0.09               | -0.21             | 0.07               | Bcl7          | NM_007221.2 | Mus musculus Bcl-associated death promoter 1 (Bcl7) mRNA.                                                             |
| sd53556.13.28-S      | 0.95                | 1.03              | 1.29               | 0.83                  | 0.80                | 1.40                 | -0.19               | -0.37             | 0.12               | Pdha1         | NM_008810.2 | Mus mus                                                                                                               |

| Gene Name          | Control<br>18 Hours | Control<br>1 Week | Control<br>4 Weeks | Treatment<br>18 Hours | Treatment<br>1 Week | Treatment<br>4 Weeks | Log2 FC<br>18 Hours | Log2 FC<br>1 Week | Log2 FC<br>4 Weeks | Symbol        | Accession   | Definition                                                                                     |
|--------------------|---------------------|-------------------|--------------------|-----------------------|---------------------|----------------------|---------------------|-------------------|--------------------|---------------|-------------|------------------------------------------------------------------------------------------------|
| sd54749.27.7_8-S   | 0.72                | 1.03              | 1.05               | 0.67                  | 1.13                | 1.46                 | -0.10               | 0.15              | 0.48               | Kif4          | NM_008446.1 | Mus musculus kinesin family member 4 (Kif4) mRNA.                                              |
| sd54833.10_21-S    | 0.91                | 1.12              | 1.25               | 0.82                  | 0.90                | 1.43                 | -0.17               | -0.31             | 0.21               | Alp6ap1       | NM_018794.2 | Mus musculus ATPase H+ transporting lysosomal accessory protein 1 (Alp6ap1) mRNA.              |
| sd54837.5.1_4-S    | 0.97                | 0.96              | 1.15               | 0.82                  | 1.00                | 1.28                 | -0.25               | 0.05              | 0.17               | Erd           | NM_007927.1 | Mus musculus emerlin (Erd) mRNA.                                                               |
| sd54843.2_132-S    | 1.01                | 1.03              | 1.09               | 0.91                  | 0.80                | 1.02                 | -0.15               | -0.36             | -0.09              | Ssr4          | NM_009279   | Mus musculus signal sequence receptor delta (Ssr4) mRNA.                                       |
| sd54915.11_540-S   | 0.96                | 1.05              | 1.33               | 0.81                  | 0.91                | 1.49                 | -0.25               | -0.19             | 0.16               | Htsat1        | NM_028242.1 |                                                                                                |
| sd54919.12_462-S   | 0.94                | 1.10              | 1.11               | 0.84                  | 0.80                | 1.10                 | -0.18               | -0.46             | -0.02              | Fhl1          | NM_010211.1 | Mus musculus four and a half LIM domains 1 (Fhl1) mRNA.                                        |
| sd54930.9.1_1-S    | 0.91                | 1.00              | 1.53               | 0.75                  | 0.98                | 1.73                 | -0.28               | -0.02             | 0.18               | Hprt          | NM_013556   |                                                                                                |
| sd54944.9.1_0-S    | 0.92                | 1.04              | 1.06               | 0.85                  | 0.92                | 1.20                 | -0.09               | -0.17             | 0.19               | Slc25a14      | NM_011398.1 | Mus musculus solute carrier family 25 (mitochondrial carrier brain) member 14 (Slc25a14) mRNA. |
| sd54976.5.1_9-S    | 0.96                | 1.12              | 1.24               | 0.92                  | 0.86                | 1.43                 | -0.07               | -0.38             | 0.20               | Mcts1         | NM_026902.1 | Mus musculus malignant T cell amplified sequence 1 (Mcts1) mRNA.                               |
| sd54988.1.64_253-S | 0.94                | 1.05              | 1.07               | 0.85                  | 0.85                | 1.19                 | -0.13               | -0.31             | 0.16               | 2810428C21Rik | NM_153503.1 | Mus musculus RIKEN cDNA 2810428C21 gene (2810428C21Rik) mRNA.                                  |
| sd54990.9_78-S     | 0.91                | 1.04              | 1.17               | 0.75                  | 0.86                | 1.19                 | -0.27               | -0.27             | 0.04               | 2610020O08Rik | NM_025937   | Mus musculus RIKEN cDNA 2610020O08 gene (2610020O08Rik) mRNA.                                  |
| sd54996.3_58-S     | 0.97                | 1.04              | 1.33               | 0.82                  | 0.86                | 1.21                 | -0.25               | -0.27             | -0.13              | Pgrmc1        | NM_016783.2 | Mus musculus progesterone receptor membrane component 1 (Pgrmc1) mRNA.                         |
| sd55020.28_14-S    | 1.01                | 1.08              | 1.24               | 0.84                  | 0.80                | 1.18                 | -0.25               | -0.42             | -0.05              | Ube1x         | NM_009457.2 | Mus musculus ubiquitin-activating enzyme E1 Chr X (Ube1x) mRNA.                                |
| sd55044.4_94-S     | 0.87                | 1.06              | 1.18               | 0.78                  | 0.98                | 1.33                 | -0.17               | -0.12             | 0.18               | Mid1ip1       | NM_026524.2 |                                                                                                |

| B                                             |                  |                |                 |                    |                  |                   |                  |                |                 |               |             |  | Definition                                                                                              |
|-----------------------------------------------|------------------|----------------|-----------------|--------------------|------------------|-------------------|------------------|----------------|-----------------|---------------|-------------|--|---------------------------------------------------------------------------------------------------------|
| Gene Name                                     | Control 18 Hours | Control 1 Week | Control 4 Weeks | Treatment 18 Hours | Treatment 1 Week | Treatment 4 Weeks | Log2 FC 18 Hours | Log2 FC 1 Week | Log2 FC 4 Weeks | Symbol        | Accession   |  | Definition                                                                                              |
| g_21070949 ref. NM_019639.2_151-S             | 0.98             | 1.03           | 1.30            | 0.83               | 0.91             | 1.09              | -0.23            | -0.18          | -0.25           | Ubc           | XM_147315.1 |  | Mus musculus ubiquitin C (Ubc) mRNA.                                                                    |
| IGHM Y00818 Ig heavy constant mu_941-S        | 0.95             | 1.16           | 1.30            | 0.91               | 0.80             | 1.09              | -0.06            | -0.55          | -0.24           | Igh-6         | XM_354710.1 |  |                                                                                                         |
| IGKV4-69 AJ235942 Ig kappa variable 4-69 16-S | 0.97             | 1.11           | 1.30            | 0.84               | 0.84             | 1.13              | -0.20            | -0.39          | -0.20           |               |             |  |                                                                                                         |
| IGKV5-45 AJ235974 Ig kappa variable 5-45 8-S  | 0.96             | 1.06           | 2.08            | 0.74               | 0.88             | 1.57              | -0.33            | -0.26          | -0.41           |               |             |  |                                                                                                         |
| scf000011.1_73-S                              | 0.86             | 1.11           | 1.41            | 0.75               | 0.88             | 1.18              | -0.19            | -0.35          | -0.26           | Strn3         | NM_052973   |  | Mus musculus striatin calmodulin binding protein 3 (Strn3) mRNA.                                        |
| scf000031.1_6-S                               | 0.99             | 1.07           | 1.46            | 0.85               | 0.88             | 1.12              | -0.22            | -0.27          | -0.38           | Eif3s1        | NM_144545   |  | Mus musculus eukaryotic translation initiation factor 3 subunit 1 alpha (Eif3s1) mRNA.                  |
| scf000050.1_4-S                               | 1.16             | 1.05           | 1.20            | 1.01               | 0.82             | 0.99              | -0.20            | -0.36          | -0.29           | Gpr124        | NM_054044.1 |  | Mus musculus G protein-coupled receptor 124 (Gpr124) mRNA.                                              |
| scf000056.1_228-S                             | 0.96             | 0.94           | 1.21            | 0.99               | 0.82             | 1.07              | 0.06             | -0.20          | -0.17           | C78566        | NM_178879.2 |  |                                                                                                         |
| scf000073.1_22-S                              | 0.98             | 1.09           | 1.40            | 0.78               | 0.88             | 1.17              | -0.33            | -0.29          | -0.26           | Gloc1         | NM_178072.2 |  | Mus musculus glucocorticoid induced transcript 1 (Gloc1) mRNA.                                          |
| scf000078.1_211-S                             | 1.08             | 1.09           | 1.24            | 0.92               | 0.83             | 0.91              | -0.24            | -0.37          | -0.44           | Epn2          | NM_010148.1 |  | Mus musculus epsin 2 (Epn2) mRNA.                                                                       |
| scf000096.1_251-S                             | 1.08             | 1.11           | 1.35            | 0.96               | 0.83             | 1.04              | -0.16            | -0.41          | -0.38           | 1600012H06Rik | NM_026451.1 |  | Mus musculus RIKEN cDNA 1600012H06 gene (1600012H06Rik) mRNA.                                           |
| scf0001099.1_185-S                            | 1.00             | 1.15           | 1.36            | 0.85               | 0.91             | 1.00              | -0.23            | -0.33          | -0.46           | Si7           | NM_022332.1 |  | Mus musculus suppression of tumorigenicity 7 (Si7) mRNA.                                                |
| scf0001105.1_0-S                              | 0.98             | 1.06           | 1.32            | 0.82               | 0.85             | 1.11              | -0.27            | -0.32          | -0.24           | 4932409F11Rik | NM_029404.1 |  | Mus musculus RIKEN cDNA 4932409F11 gene (4932409F11Rik) mRNA.                                           |
| scf000111.1_99-S                              | 0.98             | 1.03           | 1.29            | 0.93               | 0.85             | 1.02              | -0.08            | -0.27          | -0.33           | Coro1a        | NM_009389.2 |  | Mus musculus coronin actin binding protein 1A (Coro1a) mRNA.                                            |
| scf0001170.1_113-S                            | 0.93             | 1.18           | 1.47            | 0.84               | 0.93             | 1.28              | -0.13            | -0.34          | -0.20           | Cbrn          | NM_175357.1 |  |                                                                                                         |
| scf0001446.1_126-S                            | 0.81             | 1.12           | 1.32            | 0.90               | 0.81             | 1.21              | 0.16             | -0.46          | -0.12           | Gosr2         | NM_019650.2 |  | Mus musculus golgi SNAP receptor complex member 2 (Gosr2) mRNA.                                         |
| scf000151.1_21-S                              | 0.91             | 1.14           | 1.25            | 0.90               | 0.72             | 1.06              | -0.02            | -0.63          | -0.24           | Rabac1        | NM_010261.1 |  | Mus musculus Rab acceptor 1 (prenylated) (Rabac1) mRNA.                                                 |
| scf0001551.1_0-S                              | 1.01             | 1.02           | 1.28            | 0.97               | 0.80             | 0.98              | -0.07            | -0.35          | -0.40           | 4933407N01Rik | NM_025745.2 |  | Mus musculus RIKEN cDNA 4933407N01 gene (4933407N01Rik) mRNA.                                           |
| scf0001586.1_298-S                            | 1.06             | 1.03           | 1.16            | 0.93               | 0.60             | 0.91              | -0.22            | -0.78          | -0.35           | Ilgae         | NM_008399.1 |  | Mus musculus integrin alpha E epithelial-associated (Ilgae) mRNA.                                       |
| scf0001631.1_196-S                            | 0.89             | 1.19           | 1.24            | 0.80               | 0.93             | 1.10              | -0.16            | -0.36          | -0.17           | Rpo1-1        | NM_009085.1 |  | Mus musculus RNA polymerase 1-1 (Rpo1-1) mRNA.                                                          |
| scf0001631.1_3-S                              | 0.97             | 1.09           | 1.11            | 1.03               | 0.85             | 0.96              | -0.05            | -0.36          | -0.20           | Ubrd1         | NM_024432.2 |  | Mus musculus UBR domain containing 1 (Ubrd1) mRNA.                                                      |
| scf0001652.1_18-S                             | 1.05             | 1.01           | 1.22            | 0.97               | 0.88             | 1.02              | -0.11            | -0.54          | -0.25           | E130307M08Rik | NM_026530.2 |  | Mus musculus RIKEN cDNA E130307M08 gene (E130307M08Rik) mRNA.                                           |
| scf0001664.1_192-S                            | 0.94             | 1.07           | 1.21            | 0.98               | 0.79             | 1.09              | 0.06             | -0.44          | -0.14           | Sic9a3r2      | NM_023055   |  | Mus musculus solute carrier family 9 (sodium/hydrogen exchanger) isoform 3 regulator 2 (Sic9a3r2) mRNA. |
| scf000172.1_1-S                               | 1.23             | 1.08           | 1.10            | 1.09               | 0.74             | 0.78              | -0.19            | -0.53          | -0.48           | Gmfg          | NM_022024.1 |  | Mus musculus glia maturation factor gamma (Gmfg) mRNA.                                                  |
| scf0001795.1_870-S                            | 1.23             | 0.98           | 1.74            | 0.97               | 0.95             | 1.22              | -0.33            | -0.04          | -0.55           | Son           | NM_178880.3 |  | Mus musculus Son cell proliferation protein (Son) transcript variant 1 mRNA.                            |
| scf0001821.1_0-S                              | 0.83             | 1.07           | 1.32            | 0.76               | 0.93             | 1.15              | -0.12            | -0.20          | -0.20           | Ppp1r2        | NM_025800   |  | Mus musculus protein phosphatase 1 regulatory (inhibitor) subunit 2 (Ppp1r2) mRNA.                      |
| scf0002097.1_75-S                             | 0.99             | 1.11           | 1.07            | 0.88               | 0.97             | 0.90              | -0.16            | -0.19          | -0.27           | Si7l          | NM_153091.2 |  | Mus musculus suppression of tumorigenicity 7-like (Si7l) mRNA.                                          |
| scf0002262.1_11-S                             | 1.02             | 1.08           | 1.23            | 0.96               | 0.93             | 0.91              | -0.09            | -0.21          | -0.43           | Rnt138        | NM_019706.2 |  | Mus musculus rna1 finger protein 138 (Rnt138) transcript variant 2 mRNA.                                |
| scf0002306.1_28-S                             | 1.05             | 1.09           | 1.28            | 0.90               | 0.92             | 1.04              | -0.23            | -0.23          | -0.31           |               | XM_283061.1 |  | Mus musculus RIKEN cDNA A630086P08 gene (A630086P08Rik) mRNA.                                           |
| scf0002356.1_173-S                            | 0.96             | 1.08           | 1.27            | 0.85               | 0.85             | 1.07              | -0.17            | -0.35          | -0.24           | Sypl          | NM_198710.1 |  | Mus musculus synaptophysin-like protein (Sypl) transcript variant 1 mRNA.                               |
| scf0002484.1_551-S                            | 0.96             | 1.09           | 1.25            | 0.92               | 0.73             | 1.08              | -0.06            | -0.56          | -0.21           | Cyhr1         | NM_180962.1 |  | Mus musculus cysteine and histidine rich 1 (Cyhr1) mRNA.                                                |
| scf0002499.1_186-S                            | 0.98             | 1.05           | 1.33            | 0.90               | 0.81             | 1.20              | -0.12            | -0.37          | -0.15           | Fbxo4         | NM_134099   |  | Mus musculus F-box only protein 4 (Fbxo4) mRNA.                                                         |
| scf0002503.1_18-S                             | 0.95             | 1.02           | 1.31            | 0.85               | 0.78             | 1.07              | -0.16            | -0.40          | -0.28           | 2610103J23Rik | NM_026002.3 |  | Mus musculus RIKEN cDNA 2610103J23 gene (2610103J23Rik) mRNA.                                           |
| scf0002511.1_1272-S                           | 1.06             | 1.06           | 1.22            | 0.94               | 0.86             | 1.05              | -0.17            | -0.30          | -0.21           | Myh9          | NM_022410.1 |  | Mus musculus myosin heavy chain IX (Myh9) mRNA.                                                         |
| scf0002740.1_2456-S                           | 1.03             | 1.04           | 1.21            | 1.00               | 0.97             | 0.98              | -0.03            | -0.10          | -0.32           | Rgs3          | NM_019482.1 |  | Mus musculus regulator of G-protein signaling 3 (Rgs3) mRNA.                                            |
| scf0002886.1_2421-S                           | 0.94             | 1.03           | 1.21            | 0.86               | 0.85             | 1.11              | -0.13            | -0.28          | -0.13           | Ikbkg         | NM_178590.2 |  | Mus musculus inhibitor of kappaB kinase gamma (Ikbkg) mRNA.                                             |
| scf0003035.1_7-S                              | 1.05             | 1.00           | 1.17            | 1.01               | 0.91             | 0.92              | -0.06            | -0.13          | -0.35           | Pex16         | NM_145122.1 |  | Mus musculus peroxisome biogenesis factor 16 (Pex16) mRNA.                                              |
| scf0003259.1_330-S                            | 1.07             | 1.10           | 1.36            | 0.85               | 0.78             | 0.88              | -0.34            | -0.48          | -0.66           | Sh2d3c        | NM_013781.2 |  | Mus musculus SH2 domain containing 3C (Sh2d3c) mRNA.                                                    |
| scf0003299.1_11-S                             | 1.00             | 0.99           | 1.25            | 0.84               | 0.89             | 1.06              | -0.24            | -0.15          | -0.22           | 2810410A08Rik | XM_130324.4 |  | Mus musculus RIKEN cDNA 2810410A08 gene (2810410A08Rik) mRNA.                                           |
| scf0003301.1_436-S                            | 0.96             | 1.08           | 1.28            | 0.82               | 0.98             | 1.04              | -0.22            | -0.15          | -0.29           | Nfs1          | NM_010911.1 |  | Mus musculus nitrogen fixation gene 1 (S. cerevisiae) (Nfs1) mRNA.                                      |
| scf0003453.1_49-S                             | 1.01             | 1.05           | 1.10            | 1.02               | 0.99             | 0.86              | 0.01             | -0.09          | -0.36           | Snx19         | NM_028874.1 |  | Mus musculus sorting nexin 19 (Snx19) mRNA.                                                             |
| scf0003508.1_490-S                            | 1.14             | 1.17           | 1.00            | 1.08               | 0.79             | 0.78              | -0.06            | -0.58          | -0.36           | BC034204      | NM_178420.2 |  | Mus musculus cDNA sequence BC034204 (BC034204) mRNA.                                                    |
| scf0003875.1_135-S                            | 0.98             | 1.03           | 1.24            | 0.91               | 0.84             | 1.08              | -0.12            | -0.28          | -0.20           | Tbxa2r        | NM_009325.1 |  | Mus musculus thromboxane A2 receptor (Tbxa2r) mRNA.                                                     |
| scf000401_1_6-S                               | 1.10             | 0.99           | 1.35            | 0.91               | 0.81             | 1.02              | -0.28            | -0.29          | -0.41           | Mef2a         | NM_013597.2 |  | Mus musculus myocyte enhancer factor 2A (Mef2a) transcript variant 1 mRNA.                              |
| scf000402.1_135-S                             | 1.01             | 1.14           | 1.44            | 0.92               | 0.80             | 1.11              | -0.13            | -0.50          | -0.38           | 2310046K10Rik | NM_029495.1 |  | Mus musculus RIKEN cDNA 2310046K10 gene (2310046K10Rik) transcript variant 1 mRNA.                      |
| scf0004041.1_32-S                             | 1.12             | 0.94           | 1.26            | 1.02               | 0.91             | 0.92              | -0.13            | -0.05          | -0.45           | AW049829      | NM_153571.1 |  | Mus musculus expressed sequence AW049829 (AW049829) mRNA.                                               |
| scf0004053.1_455-S                            | 1.09             | 0.94           | 1.59            | 1.01               | 0.87             | 1.19              | -0.09            | -0.10          | -0.42           | Dnajb6        | NM_011847   |  | Mus musculus DnaJ (Hsp40) homolog subfamily B member 6 (Dnajb6) mRNA.                                   |
| scf0004069.1_101-S                            | 1.11             | 1.01           | 1.14            | 0.92               | 0.93             | 0.96              | -0.28            | -0.12          | -0.26           | Hnrpd1        | NM_016690.2 |  | Mus musculus heterogeneous nuclear ribonucleoprotein D-like (Hnrpd1) mRNA.                              |
| scf0004118.1_555-S                            | 1.13             | 1.06           | 1.42            | 0.93               | 0.77             | 1.00              | -0.29            | -0.46          | -0.54           | Rpo1-3        | NM_181730.2 |  | Mus musculus RNA polymerase 1-3 (Rpo1-3) mRNA.                                                          |
| scf0004139.1_41-S                             | 0.82             | 1.00           | 1.24            | 0.77               | 0.86             | 1.03              | -0.10            | -0.61          | -0.26           | Aarg          | NM_024329.2 |  | Mus musculus arginyl protein (Aarg) mRNA.                                                               |
| scf000451.1_9-S                               | 1.16             | 1.00           | 1.10            | 1.08               | 0.86             | 0.83              | -0.11            | -0.22          | -0.40           | Add3          | NM_013758.2 |  | Mus musculus adducin 3 (gamma) (Add3) mRNA.                                                             |
| scf000492.1_58-S                              | 1.14             | 1.04           | 1.43            | 0.87               | 0.89             | 0.94              | -0.38            | -0.23          | -0.61           | Smbp          | NM_133352.1 |  | Mus musculus SM-11044 binding protein (Smbp) mRNA.                                                      |
| scf000503.1_244-S                             | 0.97             | 1.13           | 1.53            | 0.90               | 0.89             | 1.13              | -0.12            | -0.34          | -0.44           | C030034J04Rik | NM_175023.1 |  | Mus musculus RIKEN cDNA C030034J04 gene (C030034J04Rik) mRNA.                                           |
| scf000779.1_49-S                              | 0.90             | 1.08           | 1.26            | 0.87               | 0.90             | 1.16              | -0.04            | -0.27          | -0.12           | Land1         | NM_021295.1 |  | Mus musculus LanC (bacterial lanthibiotic synthetase component C)-like 1 (Land1) mRNA.                  |
| scf000823.1_23-S                              | 1.06             | 0.96           | 1.28            | 0.89               | 0.86             | 1.09              | -0.25            | -0.16          | -0.23           | Ppil3         | NM_027351.1 |  | Mus musculus peptidylprolyl isomerase (cyclophilin)-like 3 (Ppil3) mRNA.                                |
| scf0008913.1_4174-S                           | 0.96             | 1.00           | 1.32            | 0.90               | 0.78             | 1.10              | -0.10            | -0.34          | -0.26           | Bcl2          | NM_009741.2 |  | Mus musculus B-cell leukemia/lymphoma 2 (Bcl2) mRNA.                                                    |
| scf000916.1_126-S                             | 1.08             | 1.04           | 1.38            | 0.90               | 0.82             | 1.07              | -0.25            | -0.32          | -0.38           | Pou2f1        | NM_011137.1 |  | Mus musculus POU domain class 2 transcription factor 1 (Pou2f1) transcript variant 1 mRNA.              |
| scf000996.1_9-S                               | 0.92             | 1.08           | 1.44            | 0.92               | 0.80             | 1.05              | 0.01             | -0.43          | -0.45           | 492152B01Rik  | NM_023884.2 |  | Mus musculus RIKEN cDNA 492152B01 gene (492152B01Rik) mRNA.                                             |
| scf00100017.2_199-S                           | 0.89             | 1.07           | 1.23            | 0.84               | 0.78             | 1.10              | -0.09            | -0.45          | -0.15           | AA691260      | NM_145554.1 |  | Mus musculus expressed sequence AA691260 (AA691260) mRNA.                                               |
| scf00102607.2_257-S                           | 1.06             | 0.99           | 1.16            | 0.99               | 0.81             | 0.99              | -0.10            | -0.29          | -0.22           | Snx19         | NM_028874.1 |  | Mus musculus sorting nexin 19 (Snx19) mRNA.                                                             |
| scf00102791.2_289-S                           | 1.03             | 1.01           | 1.12            | 0.99               | 0.75             | 1.01              | -0.05            | -0.42          | -0.15           | Tcla          | NM_133986.1 |  |                                                                                                         |
| scf00103537.2_139-S                           | 1.06             | 1.14           | 1.14            | 0.93               | 0.92             | 0.91              | -0.19            | -0.32          | -0.32           | Mtd1          | NM_034012.1 |  | Mus musculus mtd domain containing 1 (Mtd1) mRNA.                                                       |
| scf00103694.2_279-S                           | 1.15             | 1.05           | 1.23            | 0.98               | 0.78             | 0.99              | -0.23            | -0.42          | -0.32           | 1110014L17Rik | NM_134020.1 |  | Mus musculus RIKEN cDNA 1110014L17 gene (1110014L17Rik) mRNA.                                           |
| scf00104252.2_200-S                           | 1.11             | 0.95           | 1.20            | 0.93               | 0.77             | 0.99              | -0.27            | -0.30          | -0.26           | Cdc42ap2      | NM_026772.1 |  | Mus musculus CDC42 effector protein (Rho GTPase binding) 2 (Cdc42ap2) mRNA.                             |
| scf00104348.1_228-S                           | 1.05             | 1.04           | 1.32            | 0.96               | 0.86             | 0.98              | -0.13            | -0.27          | -0.43           | Zfp120        | NM_181267.2 |  | Mus musculus zinc finger protein 120 (Zfp120) mRNA.                                                     |
| scf00105827.2_285-S                           | 1.02             | 1.01           | 1.22            | 0.96               | 0.74             | 1.00              | -0.08            | -0.44          | -0.28           | AI415330      | NM_178114.2 |  | Mus musculus expressed sequence AI415330 (AI415330) mRNA.                                               |
| scf00106039.1_65-S                            | 1.03             | 1.2.           |                 |                    |                  |                   |                  |                |                 |               |             |  |                                                                                                         |

| Gene Name             | Control 18 Hours | Control 1 Week | Control 4 Weeks | Treatment 18 Hours | Treatment 1 Week | Treatment 4 Weeks | Log2 FC 18 Hours | Log2 FC 1 Week | Log2 FC 4 Weeks | Symbol        | Accession    | Definition                                                                                          |
|-----------------------|------------------|----------------|-----------------|--------------------|------------------|-------------------|------------------|----------------|-----------------|---------------|--------------|-----------------------------------------------------------------------------------------------------|
| scf0014751.2 296-S    | 1.10             | 1.08           | 1.05            | 1.02               | 0.82             | 0.89              | -0.11            | -0.40          | -0.24           | Gpi1          | NM_008155.1  | Mus musculus glucose phosphate isomerase 1 (Gpi1) mRNA.                                             |
| scf0014972.1 210-S    | 1.02             | 0.84           | 1.60            | 0.93               | 0.61             | 1.05              | -0.14            | -0.45          | -0.62           | H2-K1         | NM_001001892 | Mus musculus histocompatibility 2 T region locus 22 (H2-T22) mRNA.                                  |
| scf0015039.1 320-S    | 1.08             | 0.97           | 1.40            | 1.04               | 0.67             | 0.76              | -0.06            | -0.54          | -0.91           | H2-T22        | NM_010397    | Mus musculus histocompatibility 2 T region locus 22 (H2-T22) mRNA.                                  |
| scf0015040.1 90-S     | 0.96             | 1.06           | 1.52            | 0.85               | 0.77             | 1.35              | -0.18            | -0.46          | -0.17           | H2-T23        | NM_010398.1  | Mus musculus histocompatibility 2 T region locus 23 (H2-T23) mRNA.                                  |
| scf0015051.1 240-S    | 0.98             | 1.10           | 1.44            | 0.98               | 0.75             | 1.11              | -0.11            | -0.27          | -0.37           | H2-T9         | NM_010399.2  | Mus musculus histocompatibility 2 T region locus 9 (H2-T9) mRNA.                                    |
| scf0015531.1 125-S    | 1.17             | 1.03           | 1.26            | 0.99               | 0.72             | 0.93              | -0.23            | -0.49          | -0.44           | Ndst1         | NM_008306.2  | Mus musculus N-deacetylase/N-sulfotransferase (heparan glucosaminyl) 1 (Ndst1) mRNA.                |
| scf0015598.1 13-S     | 0.74             | 1.10           | 1.39            | 0.82               | 0.68             | 1.14              | 0.17             | -0.68          | -0.29           | Iap           | NM_010490    | Mus musculus intracisternal A particles (Iap) mRNA.                                                 |
| scf0015950.1 6-S      | 1.11             | 1.06           | 1.45            | 0.90               | 0.84             | 1.06              | -0.30            | -0.32          | -0.45           | Il203         | NM_008328.1  | Mus musculus interferon activated gene 203 (Il203) mRNA.                                            |
| scf0016069.1 4-S      | 0.93             | 1.12           | 1.97            | 0.87               | 0.82             | 1.10              | -0.11            | -0.45          | -0.94           | IgI           | NM_152839.1  | Mus musculus immunoglobulin joining chain (IgJ) mRNA.                                               |
| scf0016157.2 292-S    | 0.94             | 1.00           | 1.17            | 1.00               | 0.71             | 1.08              | 0.10             | -0.45          | -0.10           | Il11ra1       | NM_010549.1  | Mus musculus interleukin 11 receptor alpha chain 1 (Il11ra1) mRNA.                                  |
| scf0016158.2 239-S    | 0.98             | 0.99           | 1.18            | 0.96               | 0.87             | 1.09              | -0.02            | -0.54          | -0.11           | Il11ra2       | NM_010550    | Mus musculus interleukin 11 receptor alpha chain 2 (Il11ra2) mRNA.                                  |
| scf0016195.2 104-S    | 1.10             | 1.03           | 1.24            | 0.98               | 0.75             | 0.82              | -0.13            | -0.60          | -0.27           | Il6a          | NM_010560.2  | Mus musculus interleukin 6 signal transducer (Il6a) mRNA.                                           |
| scf0016341.1 91-S     | 0.98             | 1.00           | 1.38            | 0.79               | 0.79             | 1.12              | -0.31            | -0.33          | -0.30           | Eif3a6        | NM_008398.1  | Mus musculus eukaryotic translation initiation factor 3 subunit 6 (Eif3a6) mRNA.                    |
| scf0016419.2 269-S    | 1.11             | 1.09           | 1.33            | 0.95               | 0.89             | 1.01              | -0.23            | -0.28          | -0.41           | Itgb5         | NM_010580.1  | Mus musculus integrin beta 5 (Itgb5) mRNA.                                                          |
| scf0016480.2 126-S    | 1.13             | 1.02           | 1.18            | 1.00               | 0.69             | 0.99              | -0.16            | -0.54          | -0.25           | Jup           | NM_010593.1  | Mus musculus junction plakoglobin (Jup) mRNA.                                                       |
| scf0016561.1 7-S      | 1.04             | 1.10           | 1.21            | 0.91               | 0.75             | 1.02              | -0.19            | -0.52          | -0.24           | Kif1b         | NM_207682.1  | Mus musculus kinesin family member 1B (Kif1b) transcript variant 1 mRNA.                            |
| scf0016600.2 249-S    | 1.23             | 1.09           | 1.23            | 0.96               | 0.88             | 0.87              | -0.35            | -0.30          | -0.51           | Klf4          | NM_010637.1  | Mus musculus Kruppel-like factor 4 (klf4) (Klf4) mRNA.                                              |
| scf00170659.1 16-S    | 1.06             | 0.98           | 1.28            | 1.03               | 0.86             | 0.96              | -0.04            | -0.18          | -0.42           | Il7f5         |              |                                                                                                     |
| scf0017105.2 303-S    | 1.27             | 0.98           | 1.27            | 1.02               | 0.75             | 0.75              | -0.24            | -0.40          | -0.79           | Lyz2          | NM_017372.2  | Mus musculus lysozyme (Lyz2) mRNA.                                                                  |
| scf0017159.2 303-S    | 0.97             | 1.09           | 1.36            | 0.82               | 0.72             | 1.14              | -0.26            | -0.57          | -0.26           | Man2b1        | NM_010764    | Mus musculus mannosidase 2 alpha B1 (Man2b1) mRNA.                                                  |
| scf0017184.1 26-S     | 1.07             | 0.97           | 1.73            | 0.91               | 0.87             | 1.22              | -0.23            | -0.16          | -0.51           | Matr3         | NM_010771.3  | Mus musculus matrin 3 (Matr3) mRNA.                                                                 |
| scf0017257.1 80-S     | 0.95             | 1.10           | 1.33            | 0.85               | 0.94             | 1.03              | -0.16            | -0.23          | -0.37           | Mecp2         | NM_010788.1  | Mus musculus methyl CpG binding protein 2 (Mecp2) mRNA.                                             |
| scf0017314.1 97-S     | 1.00             | 1.03           | 1.14            | 0.93               | 0.80             | 0.98              | -0.10            | -0.36          | -0.21           | Mgmt          | NM_008598.1  | Mus musculus O-6-methylguanine-DNA methyltransferase (Mgmt) mRNA.                                   |
| scf0017692.2 146-S    | 1.01             | 1.05           | 1.38            | 0.84               | 0.94             | 0.99              | -0.26            | -0.16          | -0.48           | Msi31         | NM_010832.2  | Mus musculus male-specific lethal-3 homolog 1 (Drosophila) (Msi31) mRNA.                            |
| scf0017936.1 74-S     | 0.91             | 1.09           | 1.34            | 0.84               | 0.88             | 1.09              | -0.12            | -0.31          | -0.29           | Nab1          | NM_008667.2  | Mus musculus Ngl-1 binding protein 1 (Nab1) mRNA.                                                   |
| scf0017937.2 143-S    | 1.04             | 0.92           | 1.13            | 0.98               | 0.80             | 0.94              | -0.08            | -0.14          | -0.34           | Nac2          | NM_008669.1  | Mus musculus Ngl-1 binding protein 2 (Nac2) mRNA.                                                   |
| scf0017972.2 200-S    | 1.09             | 1.08           | 1.21            | 0.89               | 0.81             | 1.15              | -0.14            | -0.35          | -0.18           | Ncoa1         | NM_010891.1  | Mus musculus nuclear receptor coactivator 1 (Ncoa1) mRNA.                                           |
| scf0018010.2 202-S    | 0.99             | 1.03           | 1.19            | 0.98               | 0.71             | 1.03              | -0.02            | -0.54          | -0.21           | Neu1          | NM_010893.2  | Mus musculus neuraminidase 1 (Neu1) mRNA.                                                           |
| scf0018018.1 212-S    | 1.08             | 1.03           | 1.24            | 1.00               | 0.81             | 0.98              | -0.12            | -0.32          | -0.33           | Nfatc1        | NM_198429.1  | Mus musculus nuclear factor of activated T-cells cytoplasmic calcineurin-dependent 1 (Nfatc1) mRNA. |
| scf0018089.2 54-S     | 1.04             | 1.12           | 1.03            | 1.03               | 0.76             | 0.90              | -0.02            | -0.57          | -0.20           | Nkx2-3        | NM_008699.1  | Mus musculus NK2 transcription factor related locus 3 (Drosophila) (Nkx2-3) mRNA.                   |
| scf0018484.1 248-S    | 1.03             | 0.95           | 1.35            | 1.02               | 0.64             | 0.94              | -0.02            | -0.55          | -0.58           | Pam           | NM_013626.1  | Mus musculus peptidylglycine alpha-amidating monooxygenase (Pam) mRNA.                              |
| scf0018631.2 259-S    | 1.13             | 1.00           | 0.97            | 1.24               | 0.80             | 1.01              | 0.13             | -0.31          | 0.05            | Pex11a        | NM_011088.1  | Mus musculus peroxisomal biogenesis factor 11a (Pex11a) mRNA.                                       |
| scf0018810.1 283-S    | 1.15             | 1.05           | 1.20            | 1.01               | 0.82             | 0.99              | -0.10            | -0.24          | -0.28           | Plec1         | NM_011097.1  | Mus musculus plectin 1 (Plec1) transcript variant 1 mRNA.                                           |
| scf0018813.1 104-S    | 1.11             | 1.04           | 1.21            | 0.90               | 0.82             | 0.97              | -0.31            | -0.18          | -0.11           | Pp2k          | NM_011119.1  | Mus musculus proliferation-associated 2/4 (Pp2k) mRNA.                                              |
| scf0019046.2 75-S     | 1.25             | 0.85           | 2.06            | 1.09               | 0.72             | 1.18              | -0.22            | -0.25          | -0.86           | Ppp1cb        | NM_127207.1  | Mus musculus protein phosphatase 1 catalytic subunit beta isoform (Ppp1cb) mRNA.                    |
| scf0019157.1 43-S     | 0.98             | 1.07           | 1.33            | 0.94               | 0.83             | 1.09              | -0.06            | -0.36          | -0.30           | Pscd1         | NM_011180.2  | Mus musculus pleckstrin homology Sec7 and coiled-coil domains 1 (Pscd1) mRNA.                       |
| scf0019240.2 329-S    | 1.31             | 1.07           | 1.35            | 1.10               | 0.76             | 0.67              | -0.29            | -0.50          | -1.04           | Tmsb10        | NM_025284.2  | Mus musculus thymosin beta 10 (Tmsb10) mRNA.                                                        |
| scf0019264.1 208-S    | 1.11             | 0.96           | 1.56            | 0.92               | 0.77             | 0.99              | -0.28            | -0.30          | -0.67           | Ptprc         | NM_011210.1  | Mus musculus protein tyrosine phosphatase receptor type C (Ptprc) mRNA.                             |
| scf00192657.1 320-S   | 0.88             | 1.00           | 1.63            | 0.77               | 0.91             | 1.15              | -0.21            | -0.14          | -0.50           | E12           | NM_138953.1  | Mus musculus elongation factor RNA polymerase II 2 (E12) mRNA.                                      |
| scf0019342.1 231-S    | 1.05             | 1.03           | 1.14            | 0.92               | 0.78             | 0.92              | -0.20            | -0.39          | -0.31           | Rab4b         | NM_009391.1  | Mus musculus RAB4b member RAS oncogene family (Rab4b) mRNA.                                         |
| scf0019414.2 124-S    | 1.06             | 1.13           | 1.28            | 0.90               | 0.84             | 1.06              | -0.10            | -0.41          | -0.10           | Ras3          | NM_009324.2  | Mus musculus RAS p21 protein activator 3 (Ras3) mRNA.                                               |
| scf0019647.2 60-S     | 0.96             | 1.06           | 1.30            | 0.85               | 0.95             | 1.13              | -0.18            | -0.16          | -0.21           | Rbbp6         | NM_011247.1  | Mus musculus retinoblastoma binding protein 6 (Rbbp6) mRNA.                                         |
| scf0019655.2 139-S    | 1.19             | 1.01           | 1.16            | 0.95               | 0.76             | 0.90              | -0.34            | -0.42          | -0.37           | RbmX          | NM_011252.2  | Mus musculus RNA binding motif protein X chromosome (RbmX) mRNA.                                    |
| scf0019766.1 197-S    | 0.97             | 1.11           | 1.20            | 0.96               | 0.85             | 1.12              | -0.02            | -0.38          | -0.10           | Rpk1          | NM_009068.3  | Mus musculus receptor (TNFRSF)-interacting serine-threonine kinase 1 (Rpk1) mRNA.                   |
| scf0019769.2 219-S    | 0.98             | 1.07           | 1.34            | 0.92               | 0.89             | 1.16              | -0.09            | -0.27          | -0.20           | Rit1          | NM_009069.2  | Mus musculus Ras-like without CAAX 1 (Rit1) mRNA.                                                   |
| scf0019889.2 35-S     | 1.14             | 0.96           | 1.50            | 0.98               | 0.81             | 1.10              | -0.21            | -0.25          | -0.46           | Rp2h          | NM_133669.2  | Mus musculus retinitis pigmentosa 2 homolog (human) (Rp2h) mRNA.                                    |
| scf0020230.2 317-S    | 1.01             | 1.13           | 1.32            | 0.85               | 0.80             | 1.11              | -0.24            | -0.48          | -0.24           | Sab1          | NM_009122.1  | Mus musculus special A1-rich sequence binding protein 1 (Sab1) mRNA.                                |
| scf0020452.1 241-S    | 0.97             | 1.07           | 1.52            | 0.83               | 0.84             | 1.04              | -0.22            | -0.29          | -0.12           | Satb1         | NM_009183.1  | Mus musculus special A1-rich sequence binding protein 1 (Satb1) mRNA.                               |
| scf0020455.1 36-S     | 0.96             | 1.06           | 1.31            | 0.90               | 0.91             | 1.20              | -0.10            | -0.12          | -0.11           | Sif1          | NM_009183.1  | Mus musculus sialyltransferase 8 (alpha-2-8-sialyltransferase) D (Siat8d) mRNA.                     |
| scf0020466.2 206-S    | 0.90             | 1.15           | 1.29            | 0.90               | 0.85             | 1.11              | 0.00             | -0.43          | -0.21           | Sin3a         | NM_011378.1  | Mus musculus transcriptional regulator SIN3A (yeast) (Sin3a) mRNA.                                  |
| scf0020479.2 290-S    | 1.07             | 1.06           | 1.46            | 0.82               | 0.72             | 1.06              | -0.38            | -0.55          | -0.45           | Vps4b         | NM_009190.1  | Mus musculus vacuolar protein sorting 4b (yeast) (Vps4b) mRNA.                                      |
| scf0020658.1 193-S    | 1.13             | 1.14           | 1.64            | 0.92               | 0.92             | 1.07              | -0.29            | -0.30          | -0.64           | Son           | NM_178880.3  | Mus musculus Son cell proliferation protein (Son) transcript variant 1 mRNA.                        |
| scf0020788.1 174-S    | 0.90             | 1.28           | 1.37            | 0.86               | 0.92             | 1.07              | -0.07            | -0.47          | -0.35           | Srebp2        | XM_127995.4  | Mus musculus SREBP2                                                                                 |
| scf0020846.2 62-S     | 0.99             | 0.99           | 1.44            | 0.86               | 0.73             | 1.22              | -0.20            | -0.45          | -0.24           | Stat1         | NM_009283.2  | Mus musculus signal transducer and activator of transcription 1 (Stat1) mRNA.                       |
| scf00208650.1 91-S    | 1.03             | 1.04           | 1.29            | 0.86               | 0.86             | 1.01              | -0.27            | -0.34          | -0.40           | Stat3         | XM_358883.1  | Mus musculus Stat3 B lineage lymphoma B (Stat3) mRNA.                                               |
| scf0020947.1 79-S     | 0.97             | 1.12           | 1.55            | 0.87               | 0.85             | 1.33              | -0.16            | -0.38          | -0.22           | Swap70        | NM_009302.2  | Mus musculus SWAP complex protein (Swap70) mRNA.                                                    |
| scf0020955.2 50-S     | 1.06             | 1.03           | 1.36            | 0.91               | 0.86             | 1.10              | -0.19            | -0.26          | -0.32           | Sytl1         | NM_011515.1  | Mus musculus synaptobrevin like 1 (Sytl1) mRNA.                                                     |
| scf0020973.1 244-S    | 1.08             | 1.05           | 1.26            | 0.99               | 0.79             | 0.99              | -0.13            | -0.40          | -0.34           | Syng2         | NM_009304.1  | Mus musculus synaptogyrin 2 (Syng2) mRNA.                                                           |
| scf00212168.2 86-S    | 1.04             | 1.02           | 1.14            | 1.00               | 0.73             | 1.00              | -0.06            | -0.47          | -0.19           | Zswim4        | NM_172503.2  | Mus musculus zinc finger SWIM domain containing 4 (Zswim4) mRNA.                                    |
| scf00213541.2 318-S   | 1.02             | 1.10           | 1.31            | 0.87               | 0.95             | 1.07              | -0.23            | -0.20          | -0.30           | Yhd2f         | NM_145393.2  | Mus musculus Yhd2f                                                                                  |
| scf0021417.2 96-S     | 0.99             | 1.13           | 1.34            | 0.88               | 0.89             | 1.18              | -0.18            | -0.34          | -0.18           | Zhfx1a        | NM_011546.1  | Mus musculus zinc finger homeobox 1a (Zhfx1a) mRNA.                                                 |
| scf00214855.2 186-S   | 0.98             | 1.05           | 1.19            | 0.80               | 0.80             | 1.02              | -0.10            | -0.40          | -0.21           | Arif1         | NM_145986.2  | Mus musculus Arif1 like 1 (Arif1) like 1 (Arif1) mRNA.                                              |
| scf00217430.2 91-S    | 1.01             | 1.03           | 1.30            | 0.86               | 0.73             | 1.11              | -0.24            | -0.49          | -0.24           | E030024M05Rik | NM_172574.1  | Mus musculus RIKEN cDNA E030024M05Rik gene (E030024M05Rik) mRNA.                                    |
| scf00217449.2 221-S   | 0.94             | 1.06           | 1.24            | 0.90               | 0.98             | 1.02              | -0.06            | -0.12          | -0.28           | Tlcl5         | NM_178811.3  | Mus musculus Tlcl5                                                                                  |
| scf0021761.2 320-S    | 1.14             | 1.06           | 1.62            | 0.93               | 0.84             | 1.09              | -0.29            | -0.34          | -0.60           | Mor1a1        | NM_024431    | Mus musculus mortality factor 4 like 1 (Mor1a1) mRNA.                                               |
| scf00218442.1 227-S   | 0.92             | 1.05           | 1.52            | 0.77               | 0.96             | 1.29              | -0.27            | -0.14          | -0.25           | A130038L21Rik | NM_172588.2  | Mus musculus RIKEN cDNA A130038L21Rik gene (A130038L21Rik) mRNA.                                    |
| scf0021974.1 259-S    | 1.06             | 1.14           | 1.47            | 0.91               | 0.98             | 1.02              | -0.21            | -0.22          | -0.54           | Top2b         | NM_009409.2  | Mus musculus topoisomerase (DNA) II beta (Top2b) mRNA.                                              |
| scf0021985.1 211-S    | 1.32             | 0.95           | 1.28            | 1.13               | 0.82             | 0.81              | -0.24            | -0.20          | -0.68           | Tp52          | NM_009412.1  | Mus musculus tumor protein D52 (Tp52) mRNA.                                                         |
| scf0022070.1 31-S     | 1.00             | 0.99           | 1.87            | 0.84               | 0.70             | 1.22              | -0.27            | -0.50          | -0.83           | Tp1           | NM_009429    | Mus musculus tumor protein translationally-controlled 1 (Tp1) mRNA.                                 |
| scf0022185.2 118-S    | 1.00             | 1.04           | 1.34            | 0.83               | 0.94             | 1.09              | -0.27            | -0.14          | -0.30           | U2af2         | NM_133671.1  | Mus musculus U2 small nuclear ribonucleoprotein auxiliary factor (U2AF) 2 (U2af2) mRNA.             |
| scf0022196.1 321-S    | 1.15             | 0.93           | 1.39            | 0.95               | 0.79             | 0.98              | -0.29            | -0.23          | -0.50           | Ube2i         | NM_011665.2  | Mus musculus ubiquitin-conjugating enzyme E2 (Ube2i) mRNA.                                          |
| scf00223433.2 7-S     | 1.16             | 1.00           | 1.63            | 0.91               | 0.84             | 1.10              | -0.34            | -0.26          | -0.57           | BC052328      | NM_198301.1  | Mus musculus cDNA sequence BC052328 (BC052328) mRNA.                                                |
| scf00224640.2 275-S   | 0.84             | 1.14           | 1.18            | 0.83               | 0.87             | 1.06              | -0.02            | -0.38          | -0.15           | Lem2d         | NM_146075.1  | Mus musculus RIKEN cDNA D430044G18Rik gene (D430044G18Rik) mRNA.                                    |
| scf00225608.2 164-S   | 0.97             | 0.96           | 1.13            | 0.77               | 1.11             | 1.00              | -0.32            | 0.21           | -0.18           | D430044G18Rik | NM_172628.1  | Mus musculus RIKEN cDNA D430044G18Rik gene (D430044G18Rik) mRNA.                                    |
| scf00226442.2 7-S     | 1.05             | 1.02           | 1.28            | 0.90               | 0.89             | 1.05              | -0.20            | -0.15          | -0.28           | Zfp281        | NM_177643.2  | Mus musculus zinc finger protein 281 (Zfp281) mRNA.                                                 |
| scf0022759.1 263-S    | 0.98             | 1.04           | 1.31            | 0.86               | 0.94             | 1.04              | -0.18            | -0.15          | -0.33           | Zfp97         | NM_177652.2  | Mus musculus zinc finger protein 97 (Zfp97) mRNA.                                                   |
| scf00227693.1 292-S   | 0.96             | 1.11           | 1.24            | 0.96               | 0.75             | 1.11              | -0.02            | -0.54          | -0.18           | C22075L19Rik  | NM_178541.2  | Mus musculus RIKEN cDNA C22075L19Rik gene (C22075L19Rik) mRNA.                                      |
| scf00228359.2 35-S    | 1.06             | 1.01           | 1.22            | 0.95               | 0.79             | 1.00              | -0.16            | -0.35          | -0.29           | Arhgap1       | NM_146124.2  | Mus musculus Rho GTPase activating protein 1 (Arhgap1) mRNA.                                        |
| scf00228829.1 258-S   | 1.02             | 1.11           | 1.28            | 0.86               | 0.85             | 1.02              | -0.24            | -0.35          | -0.33           | 6820402020Rik | XM_193187.4  | Mus musculus RIKEN cDNA 6820402020Rik gene (6820402020Rik) mRNA.                                    |
| scf00228866.1 190-S</ |                  |                |                 |                    |                  |                   |                  |                |                 |               |              |                                                                                                     |

| Gene Name           | Control 18 Hours | Control 1 Week | Control 4 Weeks | Treatment 18 Hours | Treatment 1 Week | Treatment 4 Weeks | Log2 FC 18 Hours | Log2 FC 1 Week | Log2 FC 4 Weeks | Symbol        | Accession   | Definition                                                                                                          |
|---------------------|------------------|----------------|-----------------|--------------------|------------------|-------------------|------------------|----------------|-----------------|---------------|-------------|---------------------------------------------------------------------------------------------------------------------|
| scf00241197.2_113-S | 1.12             | 1.09           | 1.18            | 0.92               | 0.91             | 0.95              | -0.28            | -0.25          | -0.32           | Serpib10      | NM_198028.2 | Mus musculus serine (or cysteine) proteinase inhibitor clade B (ovalbumin) member 10 (Serpib10) mRNA.               |
| scf00241230.1_314-S | 1.12             | 1.16           | 1.44            | 0.91               | 0.89             | 1.04              | -0.29            | -0.37          | -0.48           | Sialtf8       | NM_145838.1 | Mus musculus sialyltransferase B (alpha-2-8-sialyltransferase) F (Sialtf8) mRNA.                                    |
| scf0024128.2_99-S   | 1.00             | 1.11           | 1.27            | 0.94               | 0.88             | 0.98              | -0.11            | -0.33          | -0.39           | Xmr2          | NM_011917.1 | Mus musculus 5-3 exoribonuclease 2 (Xmr2) mRNA.                                                                     |
| scf00242297.2_118-S | 0.97             | 1.03           | 1.19            | 0.89               | 0.90             | 1.09              | -0.13            | -0.20          | -0.12           | 1110001C20Rik | NM_177730.2 | Mus musculus RIKEN cDNA 1110001C20 gene (1110001C20Rik) mRNA.                                                       |
| scf00244891.1_136-S | 1.06             | 1.07           | 1.43            | 0.98               | 0.91             | 1.01              | -0.08            | -0.30          | -0.13           | Dcdy2         | NM_175536.2 | Mus musculus zinc finger protein 291 (Zfp291) mRNA.                                                                 |
| scf00246710.1_261-S | 1.00             | 1.03           | 1.14            | 0.93               | 0.89             | 1.02              | -0.10            | -0.22          | -0.16           | Rhobt2        | NM_153514.3 | Mus musculus Rho-related BTB domain containing 2 (Rhobt2) mRNA.                                                     |
| scf0026428.1_235-S  | 0.93             | 1.11           | 1.25            | 0.82               | 0.86             | 1.10              | -0.18            | -0.36          | -0.17           | Orc4l         | NM_011958.2 | Mus musculus origin recognition complex subunit 4-like (S. cerevisiae) (Orc4l) mRNA.                                |
| scf0026442.1_315-S  | 1.23             | 0.88           | 1.56            | 0.90               | 0.74             | 1.14              | -0.45            | -0.24          | -0.47           | Pama5         | NM_011967.1 | Mus musculus proteasome (prosome macropain) subunit alpha type 5 (Pama5) mRNA.                                      |
| scf00268301.1_190-S | 1.01             | 1.11           | 1.41            | 0.78               | 0.86             | 1.11              | -0.35            | -0.37          | -0.33           | 4921515A04Rik | NM_172939.2 | Mus musculus RIKEN cDNA 4921515A04 gene (4921515A04Rik) mRNA.                                                       |
| scf00268448.1_163-S | 0.86             | 1.15           | 1.25            | 0.78               | 0.88             | 1.12              | -0.15            | -0.38          | -0.15           | Phf12         | NM_174852.2 | Mus musculus PHD finger protein 12 (Phf12) mRNA.                                                                    |
| scf00268977.2_205-S | 1.05             | 1.13           | 1.16            | 1.00               | 0.78             | 0.98              | -0.07            | -0.51          | -0.23           | Ubp1          | NM_019919.2 | Mus musculus latent transforming growth factor beta binding protein 1 (Ubp1) transcript variant 1 mRNA.             |
| scf00269001.1_136-S | 1.00             | 1.03           | 1.43            | 0.98               | 0.91             | 1.05              | -0.08            | -0.25          | -0.17           | Dcdy2         | NM_175536.2 | Mus musculus zinc finger protein 291 (Zfp291) mRNA.                                                                 |
| scf0027029.2_174-S  | 0.94             | 1.12           | 1.48            | 0.92               | 0.77             | 1.13              | -0.03            | -0.56          | -0.40           | Sgsh          | NM_018822.2 | Mus musculus N-sulfoglucosaminyl sulfohydrolase (sulfamidase) (Sgsh) mRNA.                                          |
| scf0027371.2_277-S  | 1.03             | 0.99           | 1.13            | 0.98               | 0.78             | 0.97              | -0.08            | -0.33          | -0.22           | Sh2d2a        | NM_021309.1 | Mus musculus SH2 domain protein 2A (Sh2d2a) mRNA.                                                                   |
| scf0027373.2_39-S   | 1.00             | 1.05           | 1.35            | 0.90               | 0.78             | 1.16              | -0.15            | -0.40          | -0.21           | Cank1e        | NM_013767.3 | Mus musculus casein kinase 1 epsilon (Cank1e) mRNA.                                                                 |
| scf0027866.2_220-S  | 0.99             | 1.04           | 1.18            | 0.88               | 0.81             | 1.03              | -0.18            | -0.37          | -0.20           | Es2el         | XM_147209.1 | Mus musculus expressed sequence 2 embryonic lethal (Es2el) mRNA.                                                    |
| scf0029807.2_10-S   | 0.85             | 1.06           | 1.20            | 0.80               | 0.96             | 1.09              | -0.10            | -0.13          | -0.14           | Tpk1          | NM_013861.1 | Mus musculus thiamin pyrophosphokinase (Tpk1) mRNA.                                                                 |
| scf0030925.2_118-S  | 1.03             | 1.17           | 1.34            | 0.96               | 0.75             | 0.82              | -0.09            | -0.62          | -0.72           | Slamf6        | NM_030710.1 | Mus musculus RIKEN cDNA D93036F22Rik                                                                                |
| scf00309497.1_298-S | 0.89             | 1.03           | 1.37            | 0.79               | 0.86             | 1.14              | -0.17            | -0.25          | -0.26           | D93036F22Rik  | NM_175713.3 | Mus musculus RIKEN cDNA D93036F22 gene (D93036F22Rik) mRNA.                                                         |
| scf00320795.2_6-S   | 1.00             | 1.12           | 1.17            | 0.94               | 0.77             | 0.99              | -0.09            | -0.54          | -0.23           | Pkn1          | NM_177262.3 | Mus musculus protein kinase N1 (Pkn1) mRNA.                                                                         |
| scf00329735.1_305-S | 0.96             | 1.07           | 1.22            | 0.97               | 0.84             | 1.12              | 0.01             | -0.35          | -0.13           | 4.93E126      | NM_177858.2 | Mus musculus hypothetical protein 4933431E20 (4933431E20) mRNA.                                                     |
| scf00353208.1_64-S  | 1.02             | 0.98           | 1.28            | 0.87               | 0.81             | 1.01              | -0.23            | -0.28          | -0.35           | 2810021G02Rik | NM_207267.1 | Mus musculus RIKEN cDNA 4930488E11 gene (4930488E11Rik) mRNA.                                                       |
| scf00399591.1_43-S  | 0.99             | 1.05           | 1.31            | 0.91               | 0.85             | 1.08              | -0.12            | -0.30          | -0.27           | 4930488E11Rik | NM_207267.1 | Mus musculus regulator of G-protein signaling 3 (Rgs3) mRNA.                                                        |
| scf0050780.1_15-S   | 1.10             | 1.07           | 1.24            | 0.99               | 0.92             | 0.97              | -0.13            | -0.21          | -0.35           | Rgs3          | NM_194921.1 | Mus musculus acyl-CoA synthetase long-chain family member 4 (Acsl4) transcript variant 2 mRNA.                      |
| scf0050790.1_147-S  | 0.96             | 1.06           | 1.33            | 0.80               | 0.88             | 1.15              | -0.26            | -0.27          | -0.22           | Acsl4         | NM_207625.1 | Mus musculus complement component 1 s subcomponent (C1s) mRNA.                                                      |
| scf0050909.1_300-S  | 1.20             | 0.90           | 1.32            | 1.00               | 0.60             | 0.83              | -0.26            | -0.55          | -0.71           | C1s           | NM_144938.3 | Mus musculus microphenin protein 1 (Mors1) mRNA.                                                                    |
| scf0051812.2_78-S   | 0.85             | 1.12           | 1.23            | 0.81               | 0.91             | 1.14              | -0.08            | -0.30          | -0.14           | Mors1         | NM_016766.2 | Mus musculus microphenin protein 1 (Mors1) mRNA.                                                                    |
| scf0052855.2_42-S   | 1.20             | 0.94           | 1.24            | 1.00               | 0.63             | 0.96              | -0.29            | -0.57          | -0.37           | Lar1          | NM_178611.2 | Mus musculus exocyst complex component 7 (Exoc7) mRNA.                                                              |
| scf0053413.2_143-S  | 0.94             | 1.04           | 1.22            | 0.87               | 0.85             | 1.10              | -0.11            | -0.28          | -0.16           | Exoc7         | NM_016857.1 | Mus musculus translocase of inner mitochondrial membrane 23 homolog (yeast) (Timm23) mRNA.                          |
| scf0053600.1_329-S  | 1.17             | 0.95           | 1.47            | 0.98               | 0.86             | 1.10              | -0.26            | -0.14          | -0.42           | Timm23        | NM_016897.1 | Mus musculus Down syndrome critical region gene 1-like 2 (Dscr12) mRNA.                                             |
| scf0053902.1_216-S  | 0.99             | 1.04           | 1.25            | 0.91               | 0.80             | 1.09              | -0.12            | -0.38          | -0.19           | Dscr12        | NM_022980.2 | Mus musculus MYST histone acetyltransferase monocytic leukemia 4 (Mysl4) mRNA.                                      |
| scf0054169.1_231-S  | 1.06             | 1.18           | 1.21            | 0.96               | 0.88             | 0.95              | -0.14            | -0.41          | -0.33           | Mysl4         | NM_017479.1 | Mus musculus SH3-domain GRB2-like BT1 (endophilin) (S3pbl1) mRNA.                                                   |
| scf0054673.1_296-S  | 0.99             | 1.10           | 1.32            | 0.83               | 0.85             | 1.03              | -0.07            | -0.20          | -0.33           | S3pbl1        | NM_018770.1 | Mus musculus immunoglobulin superfamily member 1A (Igfb4a) transcript variant 3 mRNA.                               |
| scf0054721.2_225-S  | 0.84             | 1.25           | 1.74            | 0.82               | 0.80             | 1.20              | -0.06            | -0.44          | -0.44           | Igfb4a        | NM_018770.1 | Mus musculus SAM domain and HD domain 1 (Samhd1) mRNA.                                                              |
| scf0055846.2_3-S    | 1.07             | 0.95           | 1.20            | 0.97               | 0.81             | 1.01              | -0.13            | -0.23          | -0.26           | Aq3m1         | NM_018822.2 | Mus musculus pleckstrin (Plek) mRNA.                                                                                |
| scf0056045.1_160-S  | 0.97             | 0.92           | 1.18            | 0.89               | 0.73             | 1.05              | -0.13            | -0.33          | -0.18           | Samhd1        | NM_018851.2 | Mus musculus pleckstrin (Plek) mRNA.                                                                                |
| scf0056193.2_274-S  | 1.03             | 1.24           | 1.39            | 0.89               | 0.81             | 0.96              | -0.20            | -0.61          | -0.53           | Plek          | NM_019549.1 | Mus musculus thrombospondin type 1 domain 1 (Thsd1) mRNA.                                                           |
| scf0056229.2_225-S  | 1.02             | 1.04           | 1.16            | 0.94               | 0.85             | 0.98              | -0.13            | -0.30          | -0.25           | Thsd1         | NM_019576.1 | Mus musculus Sogrens syndrome/scleroderma autoantigen 1 homolog (human) (Ssca1) mRNA.                               |
| scf0056390.1_292-S  | 0.97             | 1.07           | 1.28            | 0.89               | 0.98             | 1.17              | -0.12            | -0.12          | -0.13           | Ssca1         | NM_020491   | Mus musculus adenosine deaminase RNA-specific (Aad) mRNA.                                                           |
| scf0056417.2_229-S  | 0.99             | 1.00           | 1.27            | 0.95               | 0.85             | 1.04              | -0.12            | -0.25          | -0.29           | Aad           | NM_096555.2 | Mus musculus MHC class I antigen L (LOC56628)                                                                       |
| scf0056652.1_329-S  | 1.25             | 1.08           | 1.82            | 0.90               | 0.80             | 1.10              | -0.07            | -0.56          | -0.11           | LOC56628      | NM_019601   | Mus musculus C-type (calcium dependent carbohydrate recognition domain) lectin superfamily member 12 (Clec12) mRNA. |
| scf0056644.2_273-S  | 0.95             | 1.21           | 1.61            | 0.90               | 0.89             | 1.10              | -0.07            | -0.43          | -0.56           | Clec12        | NM_020008.1 | Mus musculus malonyl-CoA decarboxylase (Mlycd) mRNA.                                                                |
| scf0056690.1_158-S  | 0.96             | 0.97           | 1.11            | 0.95               | 0.73             | 1.03              | -0.02            | -0.40          | -0.11           | Mlycd         | NM_019966.1 | Mus musculus brain protein 17 (Bp17) mRNA.                                                                          |
| scf0056695.1_175-S  | 0.94             | 1.06           | 1.24            | 0.93               | 0.74             | 1.10              | -0.01            | -0.49          | -0.18           | Bp17          | NM_019999.1 | Mus musculus RIKEN cDNA 120002A08Rik                                                                                |
| scf0056724.1_273-S  | 1.15             | 0.97           | 1.51            | 0.97               | 0.87             | 1.06              | -0.25            | -0.17          | -0.51           | 120002A08Rik  | NM_019936.1 | Mus musculus proteasome (prosome macropain) 26S subunit non-ATPase 8 (Psmd8) mRNA.                                  |
| scf0057296.1_256-S  | 0.95             | 1.07           | 1.35            | 0.85               | 0.84             | 1.12              | -0.16            | -0.35          | -0.27           | Psmd8         | NM_026545.1 | Mus musculus telomeric repeat binding factor 2 interacting protein (Tert2ip) mRNA.                                  |
| scf0057321.2_89-S   | 0.95             | 1.10           | 1.28            | 0.87               | 0.88             | 1.10              | -0.12            | -0.32          | -0.21           | Tert2ip       | NM_020584.1 | Mus musculus telomeric repeat binding factor 2 interacting protein (Tert2ip) mRNA.                                  |
| scf0058239.1_184-S  | 1.03             | 1.11           | 1.26            | 0.95               | 0.84             | 0.92              | -0.03            | -0.22          | -0.17           | Deaf1         | NM_021428.3 | Mus musculus fibroblast growth factor (acidic) intracellular binding protein (Fibp) mRNA.                           |
| scf0058249.2_204-S  | 1.07             | 1.04           | 1.09            | 0.95               | 0.77             | 0.94              | -0.19            | -0.44          | -0.22           | Fibp          | NM_021438.1 | Mus musculus tropomyosin 3 gamma (Tpm3) mRNA.                                                                       |
| scf0059069.1_170-S  | 1.08             | 0.97           | 1.21            | 0.93               | 0.83             | 0.90              | -0.23            | -0.22          | -0.43           | Tpm3          | NM_022314.2 | Mus musculus oysterol binding protein-like 1A (Osbp1a) mRNA.                                                        |
| scf0064291.1_176-S  | 0.94             | 1.09           | 1.30            | 0.82               | 0.97             | 1.09              | -0.20            | -0.17          | -0.27           | Osbp1a        | NM_020573.1 | Mus musculus ribosomal protein L23 (Rpl23) mRNA.                                                                    |
| scf0065019.1_305-S  | 1.14             | 1.02           | 1.40            | 0.94               | 0.87             | 1.09              | -0.28            | -0.23          | -0.36           | Rpl23         | NM_022891.1 | Mus musculus DNA segment Chr 15 ERATO Doi 366 expressed (D15Erdo366e) mRNA.                                         |
| scf0065970.2_260-S  | 1.16             | 0.91           | 1.16            | 1.00               | 0.65             | 0.98              | -0.22            | -0.48          | -0.24           | D15Erdo366e   | NM_023063.1 | Mus musculus phenylalanyl-tRNA synthetase 1 (Poyx1) mRNA.                                                           |
| scf0066102.2_212-S  | 0.94             | 1.05           | 1.22            | 0.92               | 0.76             | 0.96              | -0.03            | -0.47          | -0.20           | Cxcl16        | NM_023158.3 | Mus musculus RIKEN cDNA 261004I04Rik                                                                                |
| scf0066142.1_255-S  | 0.98             | 1.20           | 1.48            | 0.93               | 0.80             | 1.11              | -0.06            | -0.11          | -0.40           | 261004I04Rik  | NM_023158.3 | Mus musculus chemokine (C-X-C motif) ligand 16 (Cxcl16) mRNA.                                                       |
| scf0066354.2_231-S  | 0.94             | 1.09           | 1.45            | 0.95               | 0.80             | 1.07              | -0.07            | -0.20          | -0.28           | Skp1          | NM_025507.1 | Mus musculus SKI interacting protein (Skp1) mRNA.                                                                   |
| scf0066440.2_150-S  | 0.98             | 1.02           | 1.36            | 0.84               | 0.87             | 1.21              | -0.22            | -0.24          | -0.17           | Cdc26         | NM_192921.1 | Mus musculus cell division cycle 26 (Cdc26) mRNA.                                                                   |
| scf0066520.2_292-S  | 1.20             | 0.88           | 1.43            | 0.99               | 0.76             | 1.00              | -0.14            | -0.20          | -0.52           | 2610001J05Rik | NM_183258.1 | Mus musculus RIKEN cDNA 2610001J05 gene (2610001J05Rik) mRNA.                                                       |
| scf0066819.2_213-S  | 1.06             | 1.06           | 1.17            | 0.91               | 0.84             | 0.94              | -0.22            | -0.33          | -0.30           | 9130422G05Rik | NM_025782.2 | Mus musculus RIKEN cDNA 9130422G05 gene (9130422G05Rik) mRNA.                                                       |
| scf0066853.2_236-S  | 1.02             | 1.09           | 1.25            | 0.93               | 0.76             | 1.11              | -0.13            | -0.51          | -0.18           | Pnpla2        | NM_025902.1 | Mus musculus peroxyl-oxidase 1 (Poyx1) mRNA.                                                                        |
| scf0066881.2_144-S  | 1.06             | 0.97           | 1.39            | 0.88               | 0.82             | 1.12              | -0.27            | -0.44          | -0.32           | Poyx1         | NM_025823.3 | Mus musculus RIKEN cDNA 261004I04Rik                                                                                |
| scf0067053.1_223-S  | 0.99             | 1.09           | 1.27            | 0.89               | 0.89             | 0.98              | -0.12            | -0.28          | -0.15           | 261004I04Rik  | NM_025902.1 | Mus musculus ubiquitin-associated protein 1 (Ubp1) mRNA.                                                            |
| scf0067123.2_83-S   | 0.95             | 1.03           | 1.40            | 0.86               | 0.98             | 1.21              | -0.07            | -0.18          | -0.21           | Ubp1          | NM_023305.2 | Mus musculus NADH dehydrogenase (ubiquinone) 1 beta subcomplex 4 (Ndufb4) mRNA.                                     |
| scf0067139.2_316-S  | 0.88             | 1.15           | 1.47            | 0.77               | 0.93             | 1.18              | -0.20            | -0.30          | -0.33           | Misc12        | NM_025993.1 | Mus musculus reticulon 4 (Rtn4) transcript variant 5 mRNA.                                                          |
| scf0067154.2_142-S  | 0.94             | 1.07           | 1.27            | 0.85               | 0.81             | 1.09              | -0.15            | -0.40          | -0.22           | 2610103J23Rik | NM_026002.3 | Mus musculus RIKEN cDNA 2610103J23 gene (2610103J23Rik) mRNA.                                                       |
| scf0067171.2_285-S  | 1.03             | 0.92           | 1.29            | 0.89               | 0.71             | 1.11              | -0.22            | -0.36          | -0.22           | 2610318G18Rik | NM_026013.1 | Mus musculus ocular development associated gene (Odag) mRNA.                                                        |
| scf0067210.1_10-S   | 0.99             | 1.05           | 1.22            | 0.80               | 0.94             | 1.01              | -0.30            | -0.17          | -0.29           | Odag          | NM_026033.1 | Mus musculus RIKEN cDNA 2810453I06Rik                                                                               |
| scf0067238.2_233-S  | 1.07             | 0.85           | 1.26            | 0.98               | 0.72             | 1.11              | -0.12            | -0.23          | -0.18           | 2810453I06Rik | NM_026050.1 | Mus musculus XPA binding protein 2 (Xab2) mRNA.                                                                     |
| scf0067439.2_98-S   | 1.01             | 1.17           | 1.24            | 0.96               | 0.91             | 0.94              | -0.09            | -0.35          | -0.19           | Xab2          | NM_026156.1 | Mus musculus RIKEN cDNA 4833421E05Rik                                                                               |
| scf0067464.2_263-S  | 1.08             | 1.04           | 1.25            | 0.98               | 0.74             | 1.05              | -0.13            | -0.47          | -0.25           | Empd4         | NM_026174.1 | Mus musculus RIKEN cDNA 4833421E05 gene (4833421E05Rik) mRNA.                                                       |
| scf0067732.1_253-S  | 1.04             | 1.07           | 1.43            | 1.02               | 0.77             | 1.01              | -0.03            | -0.47          | -0.54           | 4833421E05Rik | NM_026347.2 | Mus musculus zinc finger protein 364 (Zfp364) mRNA.                                                                 |
| scf0067769.1_231-S  | 1.09             | 0.96           | 1.07            | 1.04               | 0.90             | 0.85              | -0.06            | -0.10          | -0.33           | Gpatc2        | NM_026367.3 | Mus musculus ribosomal protein L4 (Rpl4) mRNA.                                                                      |
| scf0067845.2_211-S  | 1.02             | 1.15           | 1.54            | 0.94               | 0.93             | 1.05              | -0.11            | -0.30          | -0.57           | Zfp364        | NM_026406.2 | Mus musculus phosphatidic acid phosphatase type 2B (Ppap2b) mRNA.                                                   |
| scf0067891.1_266-S  | 0.98             | 1.00           | 1.31            | 0.82               | 0.86             | 1.14              | -0.26            | -0.21          | -0.19           | Rpl4          | NM_024212.2 | Mus musculus RIKEN cDNA 2810453I06Rik                                                                               |
| scf0067916.1_299-S  | 1.18             | 0.97           | 1.21            | 0.95               | 0.68             | 0.98              | -0.30            | -0.48          | -0.30           | Ppap2b        | NM_080555.1 | Mus musculus RIKEN cDNA 2810453I06Rik                                                                               |
| scf0067965.2_186-S  | 1.10             | 0.85           | 1.48            | 0.99               | 0.86             | 1.01              | -0.15            | -0.01          | -0.53           | Papd1         | NM_026479.2 | Mus musculus RIKEN cDNA 311002A021Rik                                                                               |
| scf0068040.1_199-S  | 0.98             | 1.03           | 1.20            | 0.96               | 0.85             | 1.10              | -0.07            | -0.25          | -0.11           | 311002A021Rik | NM_024215.1 | Mus musculus NADH dehydrogenase (ubiquinone) 1 beta subcomplex 4 (Ndufb4) mRNA.                                     |
| scf0068194.2_330-S  | 0.96             | 1.08           |                 |                    |                  |                   |                  |                |                 |               |             |                                                                                                                     |

| Gene Name           | Control 18 Hours | Control 1 Week | Control 4 Weeks | Treatment 18 Hours | Treatment 1 Week | Treatment 4 Weeks | Log2 FC 18 Hours | Log2 FC 1 Week | Log2 FC 4 Weeks | Symbol        | Accession        | Definition                                                                                                                                           |
|---------------------|------------------|----------------|-----------------|--------------------|------------------|-------------------|------------------|----------------|-----------------|---------------|------------------|------------------------------------------------------------------------------------------------------------------------------------------------------|
| scf0073834.1 147-S  | 0.95             | 1.28           | 1.29            | 0.89               | 0.95             | 1.01              | -0.09            | -0.43          | -0.37           | Atp6v1d       | NM_023721.1      | Mus musculus ATPase H+ transporting V1 subunit D (Atp6v1d) mRNA.                                                                                     |
| scf0074439.1 220-S  | 0.97             | 1.11           | 1.36            | 0.87               | 0.87             | 1.06              | -0.15            | -0.35          | -0.36           | Zda           | NM_183105.1      | Mus musculus zinc finger X-linked duplicated A (Zda) mRNA.                                                                                           |
| scf0075423.2 314-S  | 1.12             | 0.86           | 1.41            | 1.05               | 0.75             | 0.98              | -0.08            | -0.18          | -0.53           | 2810410P22Rik | NM_182994.1      |                                                                                                                                                      |
| scf0078055.1 48-S   | 1.15             | 0.91           | 1.50            | 0.95               | 0.74             | 1.03              | -0.30            | -0.30          | -0.57           | Mgea5         | NM_023799.2      | Mus musculus meningioma expressed antigen 5 (hyaluronidase) (Mgea5) mRNA.                                                                            |
| scf0078147.1 128-S  | 0.94             | 1.28           | 1.28            | 0.87               | 0.77             | 1.11              | -0.11            | -0.54          | -0.33           | Arpeg5        | NM_153832.1      | Mus musculus RAS GTPase activating protein 15 (Arpeg5) mRNA.                                                                                         |
| scf0078438.2 4-S    | 0.95             | 1.04           | 1.41            | 0.96               | 0.83             | 1.06              | 0.00             | -0.30          | -0.42           | 2310015N21Rik | NM_181397.1      | Mus musculus RIKEN cDNA 2310015N21 gene (2310015N21Rik) mRNA.                                                                                        |
| scf0078884.2 52-S   | 1.12             | 1.08           | 1.27            | 0.96               | 0.84             | 0.92              | -0.23            | -0.34          | -0.46           | Cylyp2        | NM_133769.1      | Mus musculus cytoplasmic FMR1 interacting protein 2 (Cylyp2) mRNA.                                                                                   |
| scf0078933.2 252-S  | 1.04             | 0.94           | 1.25            | 0.93               | 0.89             | 1.09              | -0.16            | -0.44          | -0.19           | 2310061N23Rik | NM_029803.1      | Mus musculus RIKEN cDNA 2310061N23 gene (2310061N23Rik) mRNA.                                                                                        |
| scf0077827.2 271-S  | 1.02             | 1.09           | 1.20            | 0.93               | 0.85             | 0.98              | -0.13            | -0.34          | -0.29           | A930040G15Rik | NM_133922.2      | Mus musculus RIKEN cDNA A930040G15 gene (A930040G15Rik) mRNA.                                                                                        |
| scf0078334.1 222-S  | 0.96             | 1.07           | 1.26            | 0.82               | 0.88             | 1.10              | -0.22            | -0.28          | -0.18           | 2700084L06Rik | NM_198164.1      | Mus musculus RIKEN cDNA 2700084L06 gene (2700084L06Rik) mRNA.                                                                                        |
| scf0080718.1 88-S   | 1.06             | 1.08           | 1.03            | 0.92               | 0.86             | 0.85              | -0.22            | -0.33          | -0.29           | Rac27b        | NM_030554.1      | Mus musculus RAB27b member RAS oncogene family (Rab27b) mRNA.                                                                                        |
| scf0081702.2 141-S  | 1.04             | 1.08           | 1.12            | 0.93               | 0.89             | 1.01              | -0.15            | -0.10          | -0.17           | Arndt17       | NM_138103.2      | Mus musculus arndt repeat domain 17 (Arndt17) transcript variant 1 mRNA.                                                                             |
| scf0083701.2 327-S  | 0.87             | 1.07           | 1.21            | 0.78               | 0.98             | 1.06              | -0.16            | -0.12          | -0.18           | Arz2          | NM_031405.1      | Mus musculus arsenite resistance protein 2 (Arz2) mRNA.                                                                                              |
| scf0083814.1 187-S  | 0.99             | 1.04           | 1.19            | 0.86               | 0.82             | 1.02              | -0.20            | -0.33          | -0.22           | Nedk4l        | NM_031881.1      | Mus musculus neural precursor cell expressed developmentally down-regulated gene 4-like (Nedk4l) mRNA.                                               |
| scf0083964.2 193-S  | 1.10             | 1.00           | 1.48            | 0.93               | 0.84             | 1.04              | -0.24            | -0.25          | -0.51           | Jan3          | NM_023277.1      | Mus musculus junction adhesion molecule 3 (Jan3) mRNA.                                                                                               |
| scf0097112.2 117-S  | 1.00             | 0.98           | 1.27            | 0.94               | 0.84             | 1.08              | -0.10            | -0.23          | -0.23           | C87860        | NM_133787.1      | Mus musculus expressed sequence C87860 (C87860) mRNA.                                                                                                |
| scf0098363.2 64-S   | 1.00             | 1.06           | 1.32            | 0.86               | 0.92             | 1.04              | -0.22            | -0.21          | -0.35           | Ehfd1         | NM_028889.1      | Mus musculus EF hand domain containing 1 (Ehfd1) mRNA.                                                                                               |
| scf0098878.2 247-S  | 1.01             | 0.98           | 1.25            | 0.90               | 0.76             | 1.05              | -0.16            | -0.37          | -0.24           | Eh4d          | NM_133838.2      | Mus musculus EH-domain containing 4 (Eh4d) mRNA.                                                                                                     |
| scf0098931.1 308-S  | 1.02             | 1.05           | 1.28            | 0.90               | 0.88             | 1.10              | -0.19            | -0.26          | -0.23           | Comm7         | NM_133850.2      | Mus musculus COMM domain containing 7 (Comm7) mRNA.                                                                                                  |
| scf0099730.2 131-S  | 1.11             | 1.03           | 1.31            | 0.92               | 0.90             | 1.05              | -0.27            | -0.19          | -0.33           | Taf13         | NM_025444.1      | Mus musculus TAF13 RNA polymerase II TATA box binding protein (TBP)-associated factor (Taf13) mRNA.                                                  |
| scf0099889.1 5-S    | 1.03             | 1.08           | 1.27            | 0.94               | 0.80             | 0.99              | -0.13            | -0.44          | -0.35           | Arlp1         | XM_130985.2      |                                                                                                                                                      |
| scf0100669.2 129-S  | 1.14             | 1.15           | 1.18            | 0.99               | 0.83             | 0.89              | -0.19            | -0.45          | -0.40           | 9930105H17Rik |                  |                                                                                                                                                      |
| scf0101023.1 246-S  | 1.01             | 1.04           | 1.23            | 0.93               | 0.82             | 1.00              | -0.13            | -0.35          | -0.30           | Zfp513        | NM_175311.3      | Mus musculus zinc finger protein 513 (Zfp513) mRNA.                                                                                                  |
| scf0101214.1 105-S  | 0.92             | 0.96           | 1.78            | 0.82               | 1.01             | 1.41              | -0.17            | 0.08           | -0.34           | G430041M01Rik | NM_198102.1      | Mus musculus RIKEN cDNA G430041M01 gene (G430041M01Rik) mRNA.                                                                                        |
| scf0102122.1 65-S   | 0.99             | 1.04           | 1.26            | 0.86               | 0.92             | 1.08              | -0.21            | -0.17          | -0.22           | 2310065K24Rik | NM_028221.2      | Mus musculus RIKEN cDNA 2310065K24 gene (2310065K24Rik) mRNA.                                                                                        |
| scf0102294.1 224-S  | 0.95             | 1.12           | 1.43            | 0.90               | 1.00             | 1.33              | -0.06            | -0.46          | -0.30           | Cyp4v3        | NM_133959.1      | Mus musculus cytochrome P450 family 4 subfamily v polypeptide 3 (Cyp4v3) mRNA.                                                                       |
| scf0102866.1 231-S  | 1.04             | 0.97           | 1.29            | 0.98               | 0.77             | 0.93              | -0.10            | -0.32          | -0.47           | Pis3          | NM_027874.1      | Mus musculus elastin 3 (Tasclom) (Pis3) mRNA.                                                                                                        |
| scf0104318.1 214-S  | 1.03             | 1.02           | 1.22            | 0.96               | 0.83             | 1.10              | -0.09            | -0.30          | -0.14           | Cank1d        | NM_027874.1      | Mus musculus casein kinase 1 delta (Cank1d) transcript variant 2 mRNA.                                                                               |
| scf0105446.1 143-S  | 1.03             | 1.08           | 1.20            | 0.88               | 0.83             | 1.02              | -0.21            | -0.38          | -0.23           | Dock9         | XM_358315.1      |                                                                                                                                                      |
| scf0105841.13 268-S | 1.03             | 1.00           | 1.29            | 0.91               | 0.79             | 0.99              | -0.18            | -0.33          | -0.39           | E030003N15Rik | XM_128129.4      | Mus musculus RIKEN cDNA E030003N15 gene (E030003N15Rik) mRNA.                                                                                        |
| scf0106593.1 2-S    | 0.98             | 1.09           | 1.34            | 0.80               | 0.93             | 1.14              | -0.29            | -0.21          | -0.24           | Rbm16         | NM_134123.2      | Mus musculus RNA binding motif protein 16 (Rbm16) mRNA.                                                                                              |
| scf0107526.6 57-S   | 1.01             | 0.90           | 1.51            | 1.01               | 0.75             | 1.01              | -0.01            | -0.25          | -0.58           | Ian1          | NM_175048.1      | Mus musculus immune associated nucleotide 1 (Ian1) transcript variant 1 mRNA.                                                                        |
| scf0108143.3 63-S   | 1.00             | 1.02           | 1.38            | 0.79               | 0.88             | 1.11              | -0.33            | -0.20          | -0.32           | Taf9          | NM_027139.3      | Mus musculus TAF9 RNA polymerase II TATA box binding protein (TBP)-associated factor (Taf9) mRNA.                                                    |
| scf0108755.1 38-S   | 0.98             | 1.04           | 1.25            | 0.98               | 0.83             | 1.05              | -0.04            | -0.33          | -0.28           | 2610208E05Rik | NM_1610208E05Rik | Mus musculus RIKEN cDNA 2610208E05 gene (2610208E05Rik) mRNA.                                                                                        |
| scf0108827.4 201-S  | 1.00             | 1.08           | 1.43            | 0.87               | 0.83             | 1.18              | -0.21            | -0.38          | -0.29           | 2810483C06Rik | NM_175396.3      | Mus musculus RIKEN cDNA 2810483C06 gene (2810483C06Rik) mRNA.                                                                                        |
| scf0109032.3 2-S    | 1.10             | 1.06           | 1.21            | 0.96               | 0.84             | 0.97              | -0.20            | -0.32          | -0.32           | 5830484A20Rik | NM_284155.2      | Mus musculus RIKEN cDNA 5830484A20 gene (5830484A20Rik) mRNA.                                                                                        |
| scf0109135.16 234-S | 1.10             | 0.99           | 1.23            | 0.96               | 0.82             | 0.97              | -0.19            | -0.39          | -0.34           | Plekha5       | NM_144920.2      | Mus musculus methionine sulfoxide reductase A (MsrA) mRNA.                                                                                           |
| scf0110265.1 302-S  | 1.00             | 0.98           | 1.17            | 1.00               | 0.78             | 0.87              | 0.01             | -0.32          | -0.45           | MsrA          | NM_026322.2      | Mus musculus acetyl-Coenzyme A dehydrogenase long-chain (Acadl) mRNA.                                                                                |
| scf011363.1 35-S    | 1.03             | 0.98           | 1.60            | 0.87               | 0.78             | 1.19              | -0.26            | -0.33          | -0.45           | Acadl         | NM_007381.2      | Mus musculus lysosomal-associated protein transmembrane 4B (LapTM4b) mRNA.                                                                           |
| scf011428.8 210-S   | 1.11             | 1.05           | 1.26            | 1.00               | 0.73             | 0.95              | -0.16            | -0.48          | -0.42           | LapTM4b       | NM_025121.2      | Mus musculus acyl-Coenzyme A oxidase 1 (palmitoyl) (Acot1) mRNA.                                                                                     |
| scf0114430.3 98-S   | 1.08             | 0.98           | 1.16            | 0.98               | 1.14             | 0.97              | -0.14            | -0.37          | -0.34           | Acot1         | NM_015729.2      | Mus musculus response to metastatic cancers 1 (Rmcst1) mRNA.                                                                                         |
| scf0114807.6 24-S   | 0.98             | 1.09           | 1.82            | 0.91               | 0.68             | 1.06              | -0.13            | -0.66          | -0.78           | Rmcst1        | NM_207105.1      | Mus musculus a disintegrin and metalloproteinase domain 19 (metrin beta) (Adam19) mRNA.                                                              |
| scf011492.26 194-S  | 1.10             | 0.98           | 1.22            | 0.97               | 0.79             | 0.91              | -0.20            | -0.28          | -0.43           | Adam19        | NM_009616        | Mus musculus alcohol dehydrogenase 5 (class III) chi polypeptide (Ahd5) mRNA.                                                                        |
| scf011532.9 123-S   | 1.20             | 0.99           | 1.44            | 0.97               | 0.78             | 1.01              | -0.30            | -0.33          | -0.53           | Ahd5          | NM_007410.2      | Mus musculus cDNA sequence BC005682 (BC005682) mRNA.                                                                                                 |
| scf0116891.1 127-S  | 1.16             | 1.03           | 1.16            | 0.90               | 0.80             | 0.89              | -0.36            | -0.20          | -0.39           | BC005682      | NM_033562.2      | Mus musculus acidic (leucine-rich) nuclear phosphoprotein 32 family member A (Anp32a) mRNA.                                                          |
| scf011737.7 8-S     | 1.09             | 1.00           | 1.37            | 0.79               | 0.87             | 1.09              | -0.46            | -0.20          | -0.33           | Anp32a        | NM_009672.2      | Mus musculus apolipoprotein E (ApoE) mRNA.                                                                                                           |
| scf011816.1 11-S    | 0.95             | 1.18           | 1.56            | 0.88               | 0.79             | 1.40              | -0.10            | -0.56          | -0.16           | ApoE          | NM_009596.2      | Mus musculus apolipoprotein E type 2 complex subunit 1B (Arpc1b) mRNA.                                                                               |
| scf011867.9 22-S    | 1.16             | 1.12           | 1.16            | 1.05               | 0.81             | 0.90              | -0.45            | -0.19          | -0.45           | Arpc1b        | NM_015731.2      | Mus musculus ATPase class II type 9A (Alpha) mRNA.                                                                                                   |
| scf011981.2 30-S    | 1.07             | 1.15           | 1.06            | 1.07               | 0.88             | 0.86              | 0.09             | -0.40          | -0.30           | Alpha         | NM_007929.2      | Mus musculus ATPase H+ transporting V0 subunit C (Atp6v0c) mRNA.                                                                                     |
| scf011984.1 128-S   | 1.14             | 1.00           | 1.61            | 0.92               | 0.72             | 1.05              | -0.33            | -0.48          | -0.63           | Atp6v0c       | NM_007929.2      | Mus musculus BTB and CNC homology 2 (Bach2) mRNA.                                                                                                    |
| scf012014.3 94-S    | 1.02             | 1.17           | 1.31            | 0.85               | 0.91             | 1.03              | -0.26            | -0.33          | -0.36           | Bach2         | NM_007521.2      | Mus musculus B-cell leukemia/lymphoma 2 (Bcl2) mRNA.                                                                                                 |
| scf012043.1 20-S    | 0.91             | 1.12           | 1.26            | 0.86               | 0.93             | 1.03              | -0.23            | -0.26          | -0.29           | Bcl2          | NM_177410.1      | Mus musculus complement component 4 (within H-2S) (C4) mRNA.                                                                                         |
| scf012268.2 49-S    | 0.98             | 1.05           | 1.44            | 0.84               | 0.76             | 1.26              | -0.21            | -0.47          | -0.18           | C4            | NM_009780        | Mus musculus calcium channel voltage dependent alpha2/delta subunit 3 (Cacna2d3) mRNA.                                                               |
| scf012294.1 10-S    | 1.11             | 0.93           | 1.33            | 1.23               | 0.83             | 0.74              | 0.14             | -0.15          | -0.87           | Cacna2d3      | NM_009785.1      | Mus musculus cyclin D1 (Ccnd1) mRNA.                                                                                                                 |
| scf012389.5 102-S   | 1.04             | 1.00           | 1.22            | 0.97               | 0.79             | 0.87              | -0.21            | -0.34          | -0.27           | Ccnd1         | NM_007616.2      | Mus musculus cyclin D1 (Ccnd1) mRNA.                                                                                                                 |
| scf012443.1 13-S    | 1.23             | 0.95           | 1.23            | 0.98               | 0.79             | 0.98              | -0.34            | -0.12          | -0.32           | Ccnd1         | NM_007631.1      | Mus musculus CD36 antigen (Cd36) mRNA.                                                                                                               |
| scf012491.1 51-S    | 1.08             | 0.96           | 1.54            | 0.94               | 0.78             | 0.98              | -0.21            | -0.30          | -0.66           | Cd36          | NM_007643.2      | Mus musculus CD3 antigen epsilon polypeptide (Cd3e) mRNA.                                                                                            |
| scf012501.1 271-S   | 0.99             | 1.10           | 1.19            | 0.90               | 0.78             | 1.00              | -0.15            | -0.47          | -0.24           | Cd3e          | NM_007648        | Mus musculus CD69 antigen (Cd69) mRNA.                                                                                                               |
| scf012515.2 183-S   | 0.94             | 1.36           | 1.31            | 0.83               | 0.82             | 1.10              | -0.19            | -0.71          | -0.26           | Cd69          | XM_132882.1      | Mus musculus cold inducible RNA binding protein (Cirbp) mRNA.                                                                                        |
| scf012696.5 98-S    | 1.14             | 1.08           | 1.35            | 1.14               | 0.59             | 0.80              | 0.02             | -0.88          | -0.73           | Cirbp         | NM_007705.1      | Mus musculus clathrin light polypeptide (Lcl) (Clta) mRNA.                                                                                           |
| scf012757.9 180-S   | 1.10             | 1.00           | 1.51            | 0.94               | 0.80             | 1.08              | -0.23            | -0.32          | -0.51           | Clta          | NM_016760.1      | Mus musculus collagen type alpha 2 (Col1a2) mRNA.                                                                                                    |
| scf012843.30 10-S   | 1.28             | 0.84           | 1.13            | 0.86               | 0.69             | 0.87              | -0.28            | -0.28          | -0.28           | Col1a2        | NM_007716.2      | Mus musculus cysteine-rich protein 1 (intestinal) (Crip1) mRNA.                                                                                      |
| scf012925.2 22-S    | 1.03             | 1.07           | 1.33            | 0.83               | 0.89             | 1.05              | -0.33            | -0.26          | -0.35           | Crip1         | NM_007793.1      | Mus musculus colony stimulating factor 1 receptor (Csf1r) mRNA.                                                                                      |
| scf012978.19 21-S   | 1.12             | 1.15           | 1.50            | 0.88               | 0.74             | 1.20              | -0.32            | -0.62          | -0.33           | Csf1r         | NM_007793.1      | Mus musculus cytotoxic T lymphocyte-associated protein 2 alpha (Ctla2a) mRNA.                                                                        |
| scf013024.1 14-S    | 1.22             | 0.96           | 1.45            | 1.06               | 0.66             | 0.85              | -0.16            | -0.54          | -0.80           | Ctla2a        | NM_007796.1      | Mus musculus DEAD (Asp-Glu-Ala-Asp) box polypeptide 5 (Ddx5) mRNA.                                                                                   |
| scf013207.1 29-S    | 1.19             | 0.92           | 1.51            | 1.07               | 0.84             | 0.96              | -0.16            | -0.14          | -0.66           | Ddx5          | NM_007840.1      | Mus musculus dolichol-phosphate (beta-D) mannosyltransferase 1 (Dpm1) mRNA.                                                                          |
| scf013480.1 38-S    | 1.13             | 0.99           | 1.57            | 0.92               | 0.82             | 1.09              | -0.31            | -0.27          | -0.55           | Dpm1          | NM_010072.2      | Mus musculus similar to Elongation factor 1-alpha 1 (EF-1-alpha-1) (Elongation factor 1 A-1) (eEF1A-1) (Elongation factor Tu) (EF-Tu) (Eef1a1) mRNA. |
| scf013627.1 210-S   | 1.08             | 1.02           | 1.58            | 0.98               | 0.75             | 0.96              | -0.13            | -0.45          | -0.76           | Eef1a1        | NM_203999.2      | Mus musculus similar to Elongation factor 1-alpha 2 (EF-1-alpha-2) (Elongation factor 2 A-2) (eEF2A-2) (Elongation factor Tu) (EF-Tu) (Eef2a1) mRNA. |
| scf013690.1 50-S    | 0.99             | 0.99           | 1.49            | 0.79               | 0.81             | 1.22              | -0.31            | -0.30          | -0.30           | Eef2a1        | NM_013507.2      | Mus musculus CUG triplet repeat/RNA binding protein 2 (Cugbp2) mRNA.                                                                                 |
| scf014007.1 13-S    | 1.14             | 1.03           | 1.34            | 0.88               | 0.81             | 1.00              | -0.37            | -0.33          | -0.43           | Cugbp2        | NM_010160.1      | Mus musculus ets variant gene 1 (Etv1) mRNA.                                                                                                         |
| scf014009.13 0-S    | 1.01             | 1.04           | 1.30            | 0.87               | 0.76             | 1.06              | -0.22            | -0.43          | -0.29           | Etv1          | NM_007960.1      | Mus musculus fatty acid amide hydrolase (Faah) mRNA.                                                                                                 |
| scf014073.1 90-S    | 1.05             | 1.06           | 1.29            | 0.99               | 0.85             | 0.96              | -0.08            | -0.29          | -0.42           | Faah          | NM_010173.2      | Mus musculus collectin sub-family member 12 (Colec12) mRNA.                                                                                          |
| scf0140792.13 120-S | 1.11             | 0.93           | 1.35            | 0.99               | 0.70             | 0.98              | -0.17            | -0.39          | -0.49           | Colec12       | NM_130449.1      | Mus musculus collectin sub-family member 12 (Colec12) mRNA.                                                                                          |
| scf0140795.1 279-S  | 1.10             | 1.05           | 1.36            | 1.03               | 0.66             | 1.03              | -0.10            | -0.67          | -0.40           | P2ry14        | NM_133200.2      | Mus musculus Finkel-Biskeys-Rally murine sarcoma virus (FBR-MuSV) ubiquitously expressed (fox derived) (Fau) mRNA.                                   |
| scf014109.3 67-S    | 0.91             | 1.09           | 1.31            | 0.79               | 0.84             | 1.09              | -0.22            | -0.38          | -0.27           | Fau           | NM_007990        | Mus musculus interluciferin A induced 1 (Ilai1) mRNA.                                                                                                |
| scf014204.4 298-S   | 1.01             | 1.03           | 1.29            | 0.90               | 0.88             | 0.95              | -0.19            | -0.31          | -0.44           | Ilai1         | NM_010215.1      | Mus musculus colvix carrier family 27 (glycerol-6-phosphate transporter) member 4 (Slc37a4) mRNA.                                                    |
| scf014385.1 406-S   | 1.07             | 1.06           | 1.07            | 0.96               | 0.82             | 0.95              | -0.12            | -0.37          | -0.17           | Slc37a4       | NM_008093.2      | Mus musculus UDP-N-acetyl-alpha-D-galactosamine polypeptide N-acetylglucosaminyltransferase 1 (Galnt1) mRNA.                                         |
| scf014423.12 13-S   | 1.18             | 0.99           | 1.63            | 0.99               | 0.78             | 1.10              | -0.24            | -0.35          | -0.61           | Galnt1        | NM_013814.2</    |                                                                                                                                                      |

| Gene Name          | Control 18 Hours | Control 1 Week | Control 4 Weeks | Treatment 18 Hours | Treatment 1 Week | Treatment 4 Weeks | Log2 FC 18 Hours | Log2 FC 1 Week | Log2 FC 4 Weeks | Symbol        | Accession   | Definition                                                                                                       |
|--------------------|------------------|----------------|-----------------|--------------------|------------------|-------------------|------------------|----------------|-----------------|---------------|-------------|------------------------------------------------------------------------------------------------------------------|
| sc016149.9_25-S    | 0.97             | 1.24           | 1.68            | 0.81               | 0.89             | 1.33              | -0.26            | -0.46          | -0.34           | Il            | NM_010545.2 | Mus musculus Ia-associated invariant chain (Ii) mRNA.                                                            |
| sc016440.6_35-S    | 0.97             | 1.15           | 1.36            | 0.92               | 0.87             | 1.02              | -0.07            | -0.39          | -0.42           | Itp3b         | NM_080553.1 | Mus musculus inositol 145-triphosphate receptor 3 (Itp3) mRNA.                                                   |
| sc016565.3_322-S   | 0.95             | 1.13           | 1.40            | 0.90               | 0.76             | 0.97              | -0.22            | -0.55          | -0.52           | Kif21b        | NM_019962.2 | Mus musculus kinesin family member 21B (Kif21b) mRNA.                                                            |
| sc016651.4_36-S    | 1.07             | 1.00           | 1.18            | 0.93               | 0.73             | 1.04              | -0.07            | -0.46          | -0.19           | Sesn          | NM_010656.1 | Mus musculus sarcospan (Sesn) mRNA.                                                                              |
| sc016739.32_71-S   | 1.01             | 0.99           | 1.14            | 0.98               | 0.88             | 0.98              | -0.04            | -0.30          | -0.23           | Lem2          | NM_038483.2 | Mus musculus lemnin beta 2 (Lem2) mRNA.                                                                          |
| sc016971.1_277-S   | 1.19             | 1.09           | 1.49            | 0.91               | 0.67             | 1.05              | -0.38            | -0.67          | -0.52           | Lrp1          | NM_008512.1 | Mus musculus low density lipoprotein receptor-related protein 1 (Lrp1) mRNA.                                     |
| sc0170716.1_183-S  | 1.07             | 1.06           | 1.15            | 1.03               | 0.73             | 0.94              | -0.07            | -0.54          | -0.29           | Cyp4f13       | NM_130882.1 | Mus musculus cytochrome P450 family 4 subfamily 1 polypeptide 13 (Cyp4f13) mRNA.                                 |
| sc0170719.14_114-S | 1.02             | 1.10           | 1.30            | 0.84               | 0.91             | 1.02              | -0.27            | -0.28          | -0.35           | Oxr1          | NM_130885.1 | Mus musculus oxidation resistance 1 (Oxr1) mRNA.                                                                 |
| sc0170768.1_23-S   | 0.99             | 1.05           | 1.24            | 0.88               | 0.72             | 1.05              | -0.17            | -0.55          | -0.44           | Plkb3         | NM_172976.1 | Mus musculus 6-phosphofructo-2-kinase/fructose-26-biphosphatase 3 (Plkb3) mRNA.                                  |
| sc0170935.20_282-S | 0.98             | 1.05           | 1.15            | 0.95               | 0.93             | 1.01              | -0.05            | -0.17          | -0.22           | Grid2ip       | NM_133355.1 | Mus musculus glutamate receptor ionotropic delta 2 (Grid2) interacting protein 1 (Grid2ip) mRNA.                 |
| sc0171580.22_27-S  | 1.05             | 1.10           | 1.31            | 1.02               | 0.77             | 0.87              | -0.05            | -0.51          | -0.59           | Ncl           | NM_138315.1 | Mus musculus NEDD8 interacting protein with calponin homology and LIM domains (Ncl) mRNA.                        |
| sc017440.11_1-S    | 1.31             | 1.01           | 1.63            | 0.91               | 0.71             | 1.13              | -0.38            | -0.61          | -0.58           | Mdh1          | NM_038418.2 | Mus musculus malate dehydrogenase 1 NAD (soluble) (Mdh1) mRNA.                                                   |
| sc017470.1_35-S    | 0.98             | 1.11           | 1.49            | 0.96               | 0.89             | 0.96              | -0.02            | -0.30          | -0.62           | Cd200         | NM_010818   | Mus musculus CD200                                                                                               |
| sc017904.3_16-S    | 1.01             | 1.02           | 1.31            | 0.82               | 0.80             | 1.10              | -0.31            | -0.35          | -0.26           | Myh6          | NM_010860   | Mus musculus myosin light polypeptide 6 alkali smooth muscle and non-muscle (Myh6) mRNA.                         |
| sc017938.7_45-S    | 0.96             | 1.10           | 1.37            | 0.87               | 0.87             | 1.10              | -0.15            | -0.33          | -0.33           | Naca          | NM_013608.2 | Mus musculus nascent polypeptide-associated complex alpha polypeptide (Naca) mRNA.                               |
| sc018186.2_129-S   | 1.10             | 1.06           | 1.19            | 0.98               | 0.79             | 0.97              | -0.16            | -0.41          | -0.30           | Nrp           | NM_008737.1 | Mus musculus neuropilin                                                                                          |
| sc018226.2_9-S     | 0.92             | 1.07           | 1.32            | 0.81               | 0.97             | 1.13              | -0.18            | -0.14          | -0.23           | Nup62         | NM_053074.1 | Mus musculus nucleoporin 62 (Nup62) mRNA.                                                                        |
| sc018247.9_19-S    | 1.08             | 1.07           | 1.20            | 1.00               | 0.75             | 1.04              | -0.11            | -0.50          | -0.20           | Oaz2          | NM_010952.2 | Mus musculus ornithine decarboxylase antizyme 2 (Oaz2) mRNA.                                                     |
| sc018578.10_49-S   | 1.01             | 1.03           | 1.49            | 0.88               | 0.70             | 1.04              | -0.19            | -0.32          | -0.51           | Pde4b         | NM_012840.1 | Mus musculus phosphodiesterase 4B cAMP specific (Pde4b) mRNA.                                                    |
| sc018606.1_11-S    | 0.99             | 0.97           | 1.29            | 0.88               | 0.69             | 1.08              | -0.18            | -0.50          | -0.27           | Enpp2         | NM_015744   | Mus musculus ectonucleotide pyrophosphatase/phosphodiesterase 2 (Enpp2) mRNA.                                    |
| sc018632.5_33-S    | 1.02             | 1.02           | 1.18            | 0.96               | 0.81             | 1.09              | -0.09            | -0.32          | -0.12           | Pex11b        | NM_011068.2 | Mus musculus peroxisomal biogenesis factor 11b (Pex11b) mRNA.                                                    |
| sc018648.4_76-S    | 1.25             | 1.00           | 1.14            | 0.98               | 0.84             | 0.71              | -0.34            | -0.25          | -0.69           | Pgam1         | NM_023418.1 | Mus musculus phosphoglycerate mutase 1 (Pgam1) mRNA.                                                             |
| sc018725.1_0-S     | 0.95             | 1.03           | 1.63            | 0.94               | 0.76             | 1.12              | -0.02            | -0.44          | -0.54           | Pira2         | XM_486458   | Mus musculus paired-lig-like receptor A2 (Pira2) mRNA.                                                           |
| sc018824.1_278-S   | 1.07             | 1.06           | 1.12            | 0.91               | 0.87             | 0.91              | -0.24            | -0.28          | -0.31           | Pip2          | NM_019755.2 | Mus musculus proteolipid protein 2 (Pip2) mRNA.                                                                  |
| sc018984.16_308-S  | 1.02             | 1.04           | 1.39            | 0.87               | 0.73             | 1.09              | -0.22            | -0.50          | -0.35           | Por           | NM_008988.1 | Mus musculus P450 (cytochrome) oxidoreductase (Por) mRNA.                                                        |
| sc0190731.1_109-S  | 0.95             | 0.99           | 1.27            | 0.80               | 0.78             | 1.07              | -0.23            | -0.29          | -0.29           | Prrn          | NM_011117.1 | Mus musculus protein tyrosine phosphatase 44a1 (Ptp4a1) mRNA.                                                    |
| sc019243.1_42-S    | 1.01             | 1.13           | 1.51            | 0.90               | 0.69             | 1.04              | -0.15            | -0.20          | -0.55           | Pripa1        | NM_011200   | Mus musculus RNA binding motif protein X chromosome retrogene (Rbmxt) mRNA.                                      |
| sc019656.1_169-S   | 0.96             | 1.03           | 1.51            | 0.76               | 0.89             | 1.22              | -0.34            | -0.22          | -0.31           | Rbmwt         | NM_009033.1 | Mus musculus RNA binding motif protein X chromosome retrogene (Rbmwt) mRNA.                                      |
| sc019821.1_18-S    | 0.95             | 1.12           | 1.32            | 0.76               | 0.89             | 1.09              | -0.32            | -0.32          | -0.28           | Rnf2          | NM_011277.1 | Mus musculus ring finger protein 2 (Rnf2) mRNA.                                                                  |
| sc019933.5_3-S     | 0.97             | 1.07           | 1.39            | 0.91               | 0.87             | 1.12              | -0.10            | -0.30          | -0.30           | Rpl21         | NM_019647.3 | Mus musculus ribosomal protein L21 (Rpl21) mRNA.                                                                 |
| sc019942.4_1-S     | 0.85             | 1.06           | 1.35            | 0.81               | 0.92             | 1.24              | -0.06            | -0.21          | -0.13           | Rpl27         | NM_011289   | Mus musculus ribosomal protein L27 (Rpl27) mRNA.                                                                 |
| sc019951.1_25-S    | 0.94             | 1.16           | 1.30            | 0.93               | 0.93             | 1.04              | -0.01            | -0.31          | -0.31           | Rpl32         | NM_172086   | Mus musculus ribosomal protein L32 (Rpl32) mRNA.                                                                 |
| sc019981.2_48-S    | 0.91             | 1.07           | 1.30            | 0.86               | 0.81             | 1.29              | -0.10            | -0.20          | -0.20           | Rpl37a        | NM_009594.2 | Mus musculus ribosomal protein L37a (Rpl37a) mRNA.                                                               |
| sc019983.9_12-S    | 0.96             | 1.09           | 1.30            | 0.92               | 0.87             | 1.15              | -0.07            | -0.32          | -0.18           | Rps5          | NM_016980   | Mus musculus ribosomal protein L5 (Rps5) mRNA.                                                                   |
| sc020104.1_26-S    | 1.02             | 1.10           | 1.45            | 0.92               | 0.91             | 1.08              | -0.15            | -0.27          | -0.43           | Rps6          | NM_009096.1 | Mus musculus ribosomal protein S6 (Rps6) mRNA.                                                                   |
| sc020128.1_60-S    | 1.19             | 0.95           | 1.43            | 0.94               | 0.68             | 0.98              | -0.35            | -0.48          | -0.56           | Trim30        | NM_009099   | Mus musculus tripartite motif protein 30 (Trim30) mRNA.                                                          |
| sc020184.1_75-S    | 1.03             | 1.07           | 1.46            | 0.84               | 0.88             | 0.99              | -0.29            | -0.27          | -0.58           | Rxp110        | NM_011307.1 | Mus musculus retinoid X receptor interacting protein 110 (Rxp110) mRNA.                                          |
| sc020195.2_6-S     | 1.16             | 0.98           | 1.25            | 0.97               | 0.81             | 0.90              | -0.26            | -0.27          | -0.48           | S100a11       | NM_016740   | Mus musculus S100 calcium binding protein A11 (calizzarin) (S100a11) mRNA.                                       |
| sc020229.1_41-S    | 0.95             | 1.11           | 1.59            | 0.87               | 0.77             | 1.33              | -0.13            | -0.51          | -0.25           | Sat1          | NM_009121.3 | Mus musculus spermidine/spermine N1-acetyl transferase 1 (Sat1) mRNA.                                            |
| sc020320.9_193-S   | 0.97             | 1.05           | 1.48            | 0.78               | 0.80             | 1.14              | -0.31            | -0.23          | -0.33           | Sdr1          | NM_009145.1 | Mus musculus stromal cell derived factor receptor 1 (Sdr1) mRNA.                                                 |
| sc020384.11_30-S   | 1.01             | 1.05           | 1.33            | 0.89               | 0.83             | 1.19              | -0.14            | -0.34          | -0.34           | Sfrs5         | NM_009156.1 | Mus musculus cyclin like factor arginine-serine-rich 5 (Sfrs5) mRNA.                                             |
| sc020400.3_29-S    | 1.02             | 1.09           | 1.23            | 0.94               | 0.88             | 1.06              | -0.12            | -0.30          | -0.22           | Sh2d1a        | NM_011364.2 | Mus musculus SH2 domain protein 1A (Sh2d1a) mRNA.                                                                |
| sc020443.1_125-S   | 0.94             | 1.15           | 1.31            | 0.87               | 0.98             | 1.08              | -0.12            | -0.22          | -0.27           | Siat4c        | NM_009178.2 | Mus musculus sialyltransferase 4C (beta-galactoside alpha-23-sialyltransferase) (Siat4c) mRNA.                   |
| sc020463.2_41-S    | 0.85             | 1.14           | 1.44            | 0.77               | 0.85             | 1.27              | -0.15            | -0.43          | -0.18           | Cox7a2l       | XM_123188.1 | Mus musculus cytochrome c oxidase subunit VIIa polypeptide 2-like (Cox7a2l) mRNA.                                |
| sc020700.1_2-S     | 1.56             | 0.82           | 1.36            | 1.06               | 0.81             | 0.93              | -0.55            | -0.02          | -0.56           | Serpina1a     | NM_009243   | Mus musculus serine (or cysteine) proteinase inhibitor clade A member 1a (Serpina1a) mRNA.                       |
| sc020729.4_276-S   | 0.99             | 1.07           | 1.32            | 0.82               | 0.78             | 1.13              | -0.27            | -0.44          | -0.23           | Spin          | NM_011462   | Mus musculus spinin (Spin) mRNA.                                                                                 |
| sc020826.31_94-S   | 0.97             | 1.07           | 1.14            | 0.95               | 0.75             | 0.96              | -0.03            | -0.51          | -0.24           | MGC6357       | NM_144791.1 | Mus musculus hypothetical protein MGC6357 (MGC6357) mRNA.                                                        |
| sc020836.78_291-S  | 1.06             | 1.13           | 1.17            | 1.00               | 0.81             | 0.90              | -0.17            | -0.49          | -0.23           | TCF7L3        | NM_144794   | Mus musculus TCF7L3                                                                                              |
| sc020939.30_312-S  | 1.13             | 0.99           | 1.39            | 1.00               | 0.70             | 0.91              | -0.16            | -0.49          | -0.62           | Tenc1         | NM_153533.1 | Mus musculus tensin like C1 domain-containing phosphatase (Tenc1) mRNA.                                          |
| sc020912.1_298-S   | 1.13             | 1.02           | 1.71            | 0.93               | 0.85             | 1.15              | -0.27            | -0.28          | -0.60           | Stxbp3        | NM_011504.1 | Mus musculus syntaxin binding protein 3 (Stxbp3) mRNA.                                                           |
| sc020973.4_189-S   | 1.04             | 1.06           | 1.28            | 0.95               | 0.78             | 0.96              | -0.13            | -0.44          | -0.41           | Syng2         | NM_009304.1 | Mus musculus synaptogyrin 2 (Syng2) mRNA.                                                                        |
| sc0212307.7_1-S    | 1.12             | 0.96           | 1.18            | 0.96               | 0.80             | 0.92              | -0.23            | -0.25          | -0.35           | Mapre2        | NM_153058.2 | Mus musculus microtubule-associated protein RP/EB family member 2 (Mapre2) mRNA.                                 |
| sc0212503.5_0-S    | 1.07             | 0.92           | 1.17            | 1.00               | 0.70             | 1.07              | -0.10            | -0.41          | -0.13           | Paox          | NM_153783.2 | Mus musculus polyamine oxidase (Paox) mRNA.                                                                      |
| sc0214063.1_118-S  | 1.01             | 0.99           | 1.21            | 0.92               | 0.76             | 1.03              | -0.14            | -0.39          | -0.23           | 4732437J24Rik | NM_172338.1 | Mus musculus RIKEN cDNA 4732437J24 gene (4732437J24Rik) mRNA.                                                    |
| sc021452.1_161-S   | 0.83             | 0.98           | 1.21            | 0.69               | 0.83             | 0.93              | -0.23            | -0.23          | -0.23           | D303051D21    | NM_172512.1 | Mus musculus hypothetical protein D303051D21 (D303051D21) mRNA.                                                  |
| sc0216705.9_38-S   | 1.02             | 0.99           | 1.41            | 0.81               | 0.80             | 1.15              | -0.33            | -0.31          | -0.28           | Ai642036      | XM_109767.2 | Mus musculus expressed sequence A1642036 (A1642036) mRNA.                                                        |
| sc0216856.1_260-S  | 1.05             | 1.00           | 1.14            | 0.99               | 0.84             | 1.00              | -0.08            | -0.25          | -0.20           | Nlgn2         | NM_198862.1 | Mus musculus neuroligin 2 (Nlgn2) mRNA.                                                                          |
| sc0217069.13_16-S  | 0.96             | 1.09           | 1.27            | 0.84               | 0.90             | 1.12              | -0.20            | -0.28          | -0.17           | Trim25        | XM_126545.2 | Mus musculus tripartite motif protein 25 (Trim25) mRNA.                                                          |
| sc0217151.1_189-S  | 1.08             | 1.06           | 1.28            | 1.05               | 0.81             | 0.95              | -0.05            | -0.37          | -0.42           | Arl12         | NM_207231.1 | Mus musculus tripartite motif protein 47 (Trim47) mRNA.                                                          |
| sc0217333.1_84-S   | 1.09             | 0.95           | 1.14            | 1.01               | 0.76             | 0.96              | -0.12            | -0.31          | -0.25           | Trim47        | NM_172570.2 | Mus musculus tripartite motif protein 47 (Trim47) mRNA.                                                          |
| sc0217626.2_241-S  | 0.99             | 0.92           | 1.23            | 0.90               | 0.74             | 1.10              | -0.16            | -0.32          | -0.16           | Kcnk13        | NM_146037.1 | Mus musculus potassium channel subfamily K member 13 (Kcnk13) mRNA.                                              |
| sc021782.2_0-S     | 1.01             | 1.00           | 1.13            | 0.81               | 0.88             | 1.00              | -0.01            | -0.30          | -0.20           | BC002230      | NM_183155.1 | Mus musculus BAC sequence BC002230 (BC002230) mRNA.                                                              |
| sc021897.1_62-S    | 1.06             | 1.01           | 1.30            | 0.88               | 0.72             | 1.06              | -0.28            | -0.47          | -0.30           | Ttr1          | NM_030682.1 | Mus musculus toll-like receptor 1 (Ttr1) mRNA.                                                                   |
| sc0219131.1_319-S  | 1.17             | 1.01           | 1.29            | 1.07               | 0.66             | 0.89              | -0.13            | -0.61          | -0.53           | Phf11         | NM_172603.1 | Mus musculus PHD finger protein 11 (Phf11) mRNA.                                                                 |
| sc022040.1_83-S    | 1.01             | 0.88           | 1.21            | 0.98               | 0.72             | 1.08              | -0.04            | -0.29          | -0.17           | Trex1         | NM_011637.4 | Mus musculus three prime repair exonuclease 1 (Trex1) mRNA.                                                      |
| sc022110.2_300-S   | 1.09             | 0.88           | 1.57            | 0.96               | 0.70             | 1.09              | -0.19            | -0.34          | -0.56           | Tspy1         | NM_009433.2 | Mus musculus tubulin alpha 1 (Tub1) mRNA.                                                                        |
| sc022142.1_236-S   | 1.20             | 0.94           | 1.30            | 0.95               | 0.82             | 1.06              | -0.34            | -0.18          | -0.32           | Tub1          | NM_011653   | Mus musculus tubulin alpha 1 (Tub1) mRNA.                                                                        |
| sc022186.3_30-S    | 0.94             | 1.00           | 1.32            | 0.77               | 0.96             | 1.16              | -0.28            | -0.06          | -0.18           | Uba52         | NM_019883   | Mus musculus ubiquitin A-52 residue ribosomal protein fusion product 1 (Uba52) mRNA.                             |
| sc022210.1_122-S   | 1.17             | 0.86           | 1.44            | 1.03               | 0.86             | 1.01              | -0.19            | 0.00           | -0.53           | Uba2b         | NM_009458.2 | Mus musculus ubiquitin-conjugating enzyme E2B RAD6 homology (S. cerevisiae) (Uba2b) mRNA.                        |
| sc022235.9_31-S    | 1.20             | 0.99           | 1.02            | 1.10               | 0.79             | 0.78              | -0.13            | -0.34          | -0.40           | Farp1         | NM_019883   | Mus musculus FERM RhoGEF (Arhgef) and pleckstrin domain protein 1 (chondrocyte-derived) (Farp1) mRNA.            |
| sc022235.1_61-S    | 0.94             | 1.05           | 1.35            | 0.79               | 0.87             | 1.16              | -0.25            | -0.27          | -0.22           | Vdac3         | NM_011666.1 | Mus musculus voltage-dependent anion channel 3 (Vdac3) mRNA.                                                     |
| sc0224226.1_58-S   | 1.05             | 1.10           | 1.35            | 0.90               | 0.82             | 1.05              | -0.23            | -0.41          | -0.38           | D930038M13Rik | XM_599276.1 | Mus musculus RIKEN cDNA D930038M13 gene (D930038M13Rik) mRNA.                                                    |
| sc0224904.1_72-S   | 0.99             | 1.02           | 1.15            | 0.91               | 0.92             | 1.03              | -0.13            | -0.15          | -0.16           | 2410015M20Rik | NM_153152.2 | Mus musculus RIKEN cDNA 2410015M20 gene (2410015M20Rik) mRNA.                                                    |
| sc0225341.10_229-S | 0.99             | 0.98           | 1.15            | 0.97               | 0.71             | 1.03              | -0.05            | -0.44          | -0.16           | Lims2         | NM_144862.1 | Mus musculus LIM and senescent cell antigen like domains 2 (Lims2) mRNA.                                         |
| sc0225898.22_280-S | 1.01             | 1.05           | 1.18            | 0.98               | 0.86             | 0.99              | -0.04            | -0.28          | -0.25           | BC022146      | NM_144872.1 | Mus musculus cDNA sequence BC022146 (BC022146) mRNA.                                                             |
| sc0226118.2_328-S  | 1.03             | 0.85           | 1.31            | 0.92               | 0.80             | 0.99              | -0.17            | -0.36          | -0.41           | A1606181      | NM_183215   | Mus musculus expressed sequence A1606181 (A1606181) mRNA.                                                        |
| sc022655.12_147-S  | 0.99             | 0.99           | 1.29            | 1.04               | 0.90             | 0.92              | -0.20            | -0.30          | -0.51           | Ywhaz         | NM_011740.2 | Mus musculus tyrosine 3-monoxygenase/hydropahan 5-monoxygenase activation protein zeta polypeptide (Ywhaz) mRNA. |
| sc022631.1_10-S    | 1.16             | 1.05           | 1.35            | 0.95               | 0.81             | 1.01              | -0.28            | -0.36          | -0.42           | Yy1           | NM_009537.2 | Mus musculus YY1 transcription factor (Yy1) mRNA.                                                                |
| sc022632.5_69-S    | 0.94             | 0.97           | 1.72            | 0.76               | 0.91             | 1.13              | -0.31            | -0.11          | -0.60           | Yy1           | NM_009537.2 | Mus musculus YY1 transcription factor (Yy1) mRNA.                                                                |
| sc0227102.5_113-S  | 0.98             | 1.21           | 1.54            | 0.88               | 0.96             | 1.12              | -0.16            | -0.34          | -0.48           | C730042F17Rik | NM_145517.2 | Mus musculus RIKEN cDNA C730042F17 gene (C730042F17Rik)                                                          |

| Gene Name          | Control<br>18 Hours | Control<br>1 Week | Control<br>4 Weeks | Treatment<br>18 Hours | Treatment<br>1 Week | Treatment<br>4 Weeks | Log2 FC<br>18 Hours | Log2 FC<br>1 Week | Log2 FC<br>4 Weeks | Symbol        | Accession    | Definition                                                                                                     |
|--------------------|---------------------|-------------------|--------------------|-----------------------|---------------------|----------------------|---------------------|-------------------|--------------------|---------------|--------------|----------------------------------------------------------------------------------------------------------------|
| sc023986.1_240-S   | 1.06                | 1.07              | 1.41               | 0.89                  | 0.78                | 0.98                 | -0.26               | -0.44             | -0.57              | Peci          | NM_011868.1  | Mus musculus peroxisomal delta3 delta2-enoyl-Coenzyme A isomerase (Peci) mRNA.                                 |
| sc023994.4_204-S   | 0.94                | 1.03              | 1.33               | 0.84                  | 0.86                | 1.18                 | -0.16               | -0.26             | -0.17              | Dazap2        | NM_011873.2  | Mus musculus DAZ associated protein 2 (Dazap2) mRNA.                                                           |
| sc024047.3_161-S   | 1.04                | 0.83              | 1.51               | 1.02                  | 0.68                | 1.16                 | -0.05               | -0.28             | -0.38              | Cct19         | NM_011888    | Mus musculus chemokine (C-C motif) ligand 19 (Ccl19) mRNA.                                                     |
| sc0240514.1_161-S  | 1.00                | 1.08              | 1.20               | 1.00                  | 0.72                | 0.93                 | -0.02               | -0.57             | -0.36              | Aim2788       | NM_198616.1  |                                                                                                                |
| sc024136.1_38-S    | 1.10                | 1.11              | 1.11               | 0.92                  | 0.81                | 1.01                 | -0.21               | -0.28             | -0.28              | Zincf1        | NM_015353.2  | Mus musculus zinc finger homeobox 1b (Zfhv1b) mRNA.                                                            |
| sc024237.1_299-S   | 1.05                | 1.11              | 1.06               | 1.01                  | 0.85                | 0.95                 | -0.05               | -0.38             | -0.18              | Tnfrsf26      | NM_175649.2  | Mus musculus tumor necrosis factor receptor superfamily member 26 (Tnfrsf26) mRNA.                             |
| sc0244690.3_117-S  | 1.01                | 1.10              | 1.47               | 0.94                  | 0.83                | 1.06                 | -0.11               | -0.40             | -0.48              | 5930431H10    | NM_173776.2  | Mus musculus hypothetical protein 5930431H10 (5930431H10) mRNA.                                                |
| sc0245867.4_1-S    | 0.96                | 1.18              | 1.38               | 0.78                  | 1.02                | 1.07                 | -0.31               | -0.21             | -0.38              | 5330414D10Rik | NM_153594.2  | Mus musculus RIKEN cDNA 5330414D10 gene (5330414D10Rik) mRNA.                                                  |
| sc0246156.2_131-S  | 1.03                | 0.95              | 1.19               | 0.94                  | 0.77                | 1.02                 | -0.13               | -0.31             | -0.21              | Sili2         | NM_139307    | Mus musculus Sili-like 2 (Drosophila) (Sili2) mRNA.                                                            |
| sc026377.1_5-S     | 1.08                | 1.04              | 1.06               | 1.01                  | 0.90                | 0.95                 | -0.11               | -0.20             | -0.17              | Dapp1         | NM_011932.1  | Mus musculus dual activator for phosphotyrosine and 3-phosphoinositides 1 (Dapp1) mRNA.                        |
| sc026404.1_85-S    | 0.97                | 0.99              | 1.16               | 1.00                  | 0.83                | 1.03                 | 0.06                | -0.24             | -0.17              | Map3k12       | NM_009582.2  | Mus musculus mitogen activated protein kinase kinase kinase 12 (Map3k12) mRNA.                                 |
| sc026408.25_3-S    | 1.05                | 1.13              | 1.24               | 0.92                  | 0.77                | 0.94                 | -0.09               | -0.16             | -0.16              | Map3k5        | NM_005360.1  | Mus musculus mitogen activated protein kinase kinase kinase 5 (Map3k5) mRNA.                                   |
| sc026417.10_0-S    | 0.97                | 1.17              | 1.22               | 0.92                  | 0.99                | 0.97                 | -0.07               | -0.23             | -0.32              | Map3k3        | NM_011952.1  | Mus musculus mitogen activated protein kinase 3 (Map3k3) mRNA.                                                 |
| sc0266692.1_279-S  | 0.99                | 1.00              | 1.35               | 0.82                  | 0.75                | 1.07                 | -0.25               | -0.41             | -0.34              | Cpne1         | NM_170590.1  | Mus musculus copine 1 (Cpne1) transcript variant 1 mRNA.                                                       |
| sc0268470.1_0-S    | 0.99                | 1.13              | 1.40               | 0.91                  | 0.96                | 1.08                 | -0.12               | -0.24             | -0.40              | D11Moh35      | NM_172300    | Mus musculus DNA segment Chr 11 KL Mohike 35 (D11Moh35) mRNA.                                                  |
| sc0268706.9_30-S   | 0.99                | 0.99              | 1.30               | 0.94                  | 0.82                | 1.09                 | -0.09               | -0.27             | -0.25              | 9130023D20Rik | NM_178746.3  | Mus musculus RIKEN cDNA 9130023D20 gene (9130023D20Rik) mRNA.                                                  |
| sc0268783.16_21-S  | 0.93                | 1.10              | 1.30               | 0.80                  | 0.86                | 1.15                 | -0.22               | -0.35             | -0.17              | Pip3ap        | NM_172958.2  | Mus musculus phosphatidylinositol-3-phosphatase associated protein (Pip3ap) mRNA.                              |
| sc0268903.1_0-S    | 0.96                | 1.02              | 1.28               | 0.79                  | 0.90                | 1.10                 | -0.29               | -0.17             | -0.21              | Nrip1         | NM_173440.1  | Mus musculus nuclear receptor interacting protein 1 (Nrip1) mRNA.                                              |
| sc0268973.1_233-S  | 1.04                | 1.05              | 1.30               | 0.90                  | 0.85                | 1.12                 | -0.21               | -0.33             | -0.22              | Candf2        | XM_193733.3  |                                                                                                                |
| sc0268261.4_12-S   | 0.97                | 1.12              | 1.29               | 0.86                  | 0.94                | 1.11                 | -0.18               | -0.26             | -0.21              | Rpl12         | NM_009076    | Mus musculus ribosomal protein L12 (Rpl12) mRNA.                                                               |
| sc026943.1_88-S    | 0.98                | 1.09              | 1.13               | 0.89                  | 0.84                | 0.91                 | -0.16               | -0.39             | -0.30              | Vat1          | NM_012037.1  | Mus musculus vesicle amine transport protein 1 homolog (T. californica) (Vat1) mRNA.                           |
| sc0269593.2_185-S  | 1.20                | 0.94              | 1.24               | 0.97                  | 0.79                | 0.90                 | -0.31               | -0.24             | -0.48              | Luxp1         | NM_024452.1  | Mus musculus leucine zipper protein 1 (Luxp1) mRNA.                                                            |
| sc0269717.2_160-S  | 1.02                | 0.99              | 1.34               | 1.08                  | 0.78                | 0.91                 | 0.07                | -0.33             | -0.56              | A730041O15Rik | NM_178751.2  | Mus musculus RIKEN cDNA A730041O15 gene (A730041O15Rik) mRNA.                                                  |
| sc0269997.1_231-S  | 0.97                | 1.07              | 1.31               | 0.90                  | 0.84                | 1.10                 | -0.11               | -0.34             | -0.25              | 6430604K15Rik | NM_175560.2  | Mus musculus RIKEN cDNA 6430604K15 gene (6430604K15Rik) mRNA.                                                  |
| sc0270058.7_138-S  | 0.98                | 1.01              | 1.17               | 0.90                  | 0.90                | 1.00                 | -0.12               | -0.17             | -0.22              | Bpy2p1        | NM_173013.1  |                                                                                                                |
| sc027045.1_0-S     | 1.10                | 1.00              | 1.16               | 0.97                  | 0.88                | 0.98                 | -0.08               | -0.17             | -0.25              | Nhl1          | NM_026489.1  | Mus musculus nitrilase 1 (Nhl1) mRNA.                                                                          |
| sc027299.1_171-S   | 1.23                | 1.22              | 1.23               | 0.75                  | 0.91                | 1.03                 | -0.16               | -0.43             | -0.24              | Ithk1         | NM_013785.2  | Mus musculus inositol hexaphosphate kinase 1 (Ithk1) mRNA.                                                     |
| sc027419.6_267-S   | 1.06                | 1.00              | 1.24               | 0.98                  | 0.66                | 0.98                 | -0.12               | -0.58             | -0.33              | Naglu         | NM_013792.1  | Mus musculus alpha-N-acetylglucosaminidase (Sanfilippo disease IIIB) (Naglu) mRNA.                             |
| sc030935.1_107-S   | 1.17                | 0.99              | 1.22               | 0.92                  | 0.68                | 0.95                 | -0.36               | -0.53             | -0.37              | Tor3a         | NM_023141.1  | Mus musculus torsin family 3 member A (Tor3a) mRNA.                                                            |
| sc0319195.6_117-S  | 0.96                | 1.06              | 1.26               | 0.88                  | 0.86                | 1.11                 | -0.13               | -0.30             | -0.19              | Rpl17         | NM_001002239 | Mus musculus ribosomal protein L17 (Rpl17) mRNA.                                                               |
| sc0319710.13_85-S  | 1.02                | 1.09              | 1.16               | 0.99                  | 0.88                | 0.98                 | -0.06               | -0.31             | -0.25              | 4930488L10Rik | NM_028127.3  | Mus musculus RIKEN cDNA 4930488L10 gene (4930488L10Rik) mRNA.                                                  |
| sc0319749.2_91-S   | 0.98                | 1.11              | 1.18               | 0.95                  | 0.94                | 1.01                 | -0.05               | -0.24             | -0.22              | C230078M08Rik | NM_176995.2  | Mus musculus RIKEN cDNA C230078M08 gene (C230078M08Rik) mRNA.                                                  |
| sc0319999.20_16-S  | 0.98                | 1.08              | 1.30               | 0.91                  | 0.82                | 0.99                 | -0.11               | -0.32             | -0.39              | D13060C09Rik  | NM_177054.3  | Mus musculus RIKEN cDNA D13060C09 gene (D13060C09Rik) transcript variant 1 mRNA.                               |
| sc0320332.1_137-S  | 1.10                | 0.98              | 1.27               | 0.89                  | 0.72                | 0.98                 | -0.26               | -0.43             | -0.39              | 993027M05Rik  | NM_198426.1  |                                                                                                                |
| sc0320951.1_277-S  | 1.12                | 0.96              | 1.20               | 1.03                  | 0.81                | 0.87                 | -0.12               | -0.24             | -0.47              | 9030221M09Rik | NM_172288.2  | Mus musculus RIKEN cDNA 9030221M09 gene (9030221M09Rik) mRNA.                                                  |
| sc0353187.1_56-S   | 1.04                | 1.17              | 1.71               | 1.06                  | 0.64                | 0.96                 | 0.03                | -0.86             | -0.82              | Nr1d2         | NM_011584.2  | Mus musculus nuclear receptor subfamily 1 group D member 2 (Nr1d2) mRNA.                                       |
| sc0353213.16_260-S | 1.01                | 1.07              | 1.33               | 0.91                  | 0.89                | 1.02                 | -0.14               | -0.26             | -0.40              | Gloc1         | NM_133236.1  | Mus musculus glucocorticoid induced transcript 1 (Gloc1) mRNA.                                                 |
| sc0380608.4_296-S  | 0.86                | 1.15              | 1.28               | 0.77                  | 0.83                | 1.10                 | -0.15               | -0.47             | -0.21              | 2610315E15Rik | NM_145668.1  |                                                                                                                |
| sc0380967.6_277-S  | 1.04                | 1.15              | 1.21               | 0.93                  | 0.77                | 0.99                 | -0.16               | -0.56             | -0.28              | D15End405e    | NM_201359.1  | Mus musculus DNA segment Chr 15 ERATO Doi 405 expressed (D15End405e) mRNA.                                     |
| sc0394303.5_296-S  | 1.25                | 0.98              | 1.27               | 1.00                  | 0.99                | 1.08                 | -0.33               | -0.32             | -0.32              | Ugt1a13       | NM_190164.1  |                                                                                                                |
| sc0403202.4_139-S  | 1.11                | 1.14              | 0.98               | 1.00                  | 0.90                | 1.03                 | -0.14               | -0.21             | -0.24              | A430093F15Rik | NM_207529    | Mus musculus RIKEN cDNA A430093F15 gene (A430093F15Rik) mRNA.                                                  |
| sc050505.11_70-S   | 0.97                | 1.10              | 1.31               | 0.84                  | 0.79                | 1.14                 | -0.21               | -0.46             | -0.20              | Erc4          | NM_015769.1  | Mus musculus excision repair cross-complementing normal repair deficiency complementation group 4 (Erc4) mRNA. |
| sc050917.1_181-S   | 1.09                | 1.08              | 1.08               | 0.96                  | 0.89                | 0.84                 | -0.18               | -0.28             | -0.36              | Gains         | NM_016722    | Mus musculus galactosamine (N-acetyl)-6-sulfate sulfatase (Gains) mRNA.                                        |
| sc050918.1_76-S    | 1.12                | 1.03              | 1.37               | 0.94                  | 0.83                | 0.97                 | -0.24               | -0.29             | -0.49              | Myadm         | NM_016969.1  | Mus musculus myeloid-associated differentiation marker (Myadm) mRNA.                                           |
| sc050926.1_17-S    | 1.16                | 0.87              | 1.66               | 0.99                  | 0.72                | 1.09                 | -0.22               | -0.27             | -0.62              | Hnrpdl        | NM_016690    | Mus musculus heterogeneous nuclear ribonucleoprotein D-like (Hnrpdl) mRNA.                                     |
| sc051869.7_1-S     | 0.83                | 1.06              | 1.34               | 0.68                  | 1.08                | 1.01                 | -0.29               | 0.03              | -0.40              | D2Ertd145e    | NM_175238.3  | Mus musculus DNA segment Chr 2 ERATO Doi 145 expressed (D2Ertd145e) mRNA.                                      |
| sc051960.1_0-S     | 0.97                | 1.02              | 1.00               | 1.11                  | 1.08                | 0.91                 | 0.20                | 0.09              | -0.13              | 6530404F10Rik | NM_030211.1  | Mus musculus hypothetical protein 6530404F10Rik (6530404F10Rik) mRNA.                                          |
| sc052468.3_63-S    | 1.32                | 1.25              | 1.31               | 0.90                  | 0.80                | 0.98                 | -0.02               | -0.52             | -0.34              | Map2          | NM_046012.1  | Mus musculus CTD (carboxy-terminal domain RNA polymerase II) polypeptide 2 (Ctdp2) mRNA.                       |
| sc052609.1_148-S   | 0.90                | 1.25              | 1.48               | 0.82                  | 0.81                | 1.13                 | -0.14               | -0.60             | -0.39              | Chv7          | NM_144811.2  |                                                                                                                |
| sc052690.1_86-S    | 1.02                | 1.03              | 1.60               | 0.83                  | 0.85                | 1.21                 | -0.30               | -0.29             | -0.42              | D12End771e    | NM_028822.1  | Mus musculus DNA segment Chr 12 ERATO Doi 771 expressed (D12End771e) mRNA.                                     |
| sc052898.2_0-S     | 0.97                | 1.08              | 1.37               | 0.88                  | 0.83                | 1.16                 | -0.15               | -0.37             | -0.25              | D11Bwg0434e   | NM_173742.1  | Mus musculus DNA segment Chr 11 Brigham & Womens Genetics 0434 expressed (D11Bwg0434e) mRNA.                   |
| sc053610.12_290-S  | 1.01                | 1.02              | 1.39               | 0.92                  | 0.87                | 1.12                 | -0.13               | -0.23             | -0.32              | Nono          | NM_023144.1  | Mus musculus non-POU-domain-containing octamer binding protein (Nono) mRNA.                                    |
| sc053859.1_132-S   | 0.95                | 1.15              | 1.31               | 0.89                  | 0.74                | 1.09                 | -0.09               | -0.62             | -0.26              | Map3k14       | NM_016896.2  | Mus musculus mitogen-activated protein kinase kinase kinase 14 (Map3k14) mRNA.                                 |
| sc054123.3_30-S    | 1.11                | 0.96              | 1.16               | 0.97                  | 0.88                | 0.93                 | -0.20               | -0.49             | -0.32              | Irf7          | NM_016850.1  | Mus musculus interferon regulatory factor 7 (Irf7) mRNA.                                                       |
| sc054127.2_67-S    | 0.98                | 1.05              | 1.30               | 0.87                  | 0.80                | 1.21                 | -0.12               | -0.33             | -0.23              | Rps28         | NM_016844.1  | Mus musculus ribosomal protein S28 (Rps28) mRNA.                                                               |
| sc054170.29_181-S  | 0.91                | 1.11              | 1.34               | 0.86                  | 0.77                | 1.18                 | -0.08               | -0.52             | -0.17              | Rragc         | NM_017475    | Mus musculus Ras-related GTP binding C (Rragc) mRNA.                                                           |
| sc054217.2_13-S    | 0.93                | 1.17              | 1.34               | 0.83                  | 0.99                | 0.92                 | -0.17               | -0.25             | -0.54              | Rpl36         | NM_018730    | Mus musculus ribosomal protein L36 (Rpl36) mRNA.                                                               |
| sc054598.1_2-S     | 1.29                | 1.00              | 1.39               | 0.90                  | 0.90                | 0.94                 | -0.51               | -0.15             | -0.59              | Calcr1        | NM_018782.1  | Mus musculus calcitonin receptor-like (Calcr1) mRNA.                                                           |
| sc054610.1_1-S     | 1.08                | 1.15              | 1.15               | 0.94                  | 0.89                | 0.81                 | -0.19               | -0.36             | -0.52              | Tbc1d8        | NM_018775.1  | Mus musculus TBC1 domain family member 8 (Tbc1d8) mRNA.                                                        |
| sc054636.13_168-S  | 0.98                | 1.12              | 1.23               | 0.90                  | 0.91                | 1.09                 | -0.13               | -0.30             | -0.19              | Wdrx1         | NM_172372.1  |                                                                                                                |
| sc055960.6_109-S   | 0.96                | 0.99              | 1.42               | 0.91                  | 0.81                | 1.14                 | -0.08               | -0.29             | -0.32              | Ebag9         | NM_019480.3  | Mus musculus estrogen receptor-binding fragment-associated gene 9 (Ebag9) mRNA.                                |
| sc056045.1_19-S    | 0.98                | 1.13              | 1.38               | 0.83                  | 0.87                | 0.88                 | -0.17               | -0.53             | -0.31              | Samd51        | NM_018815.2  | Mus musculus SAM domain and HD domain 1 (Samd51) mRNA.                                                         |
| sc056149.9_148-S   | 1.12                | 1.01              | 1.15               | 1.01                  | 0.71                | 0.95                 | -0.14               | -0.49             | -0.27              | Grasp         | NM_019518.2  | Mus musculus GRP1 (general) receptor for phosphoinositides 1-associated scaffold protein (Grasp) mRNA.         |
| sc056258.4_7-S     | 0.99                | 0.99              | 1.67               | 0.82                  | 0.88                | 1.22                 | -0.27               | -0.16             | -0.47              | Hnrp2         | NM_019868.2  | Mus musculus heterogeneous nuclear ribonucleoprotein D2 (Hnrp2) mRNA.                                          |
| sc056351.11_60-S   | 1.17                | 0.97              | 1.74               | 0.85                  | 0.78                | 1.40                 | -0.46               | -0.32             | -0.34              | Tebp          | NM_019766.2  | Mus musculus telomerase binding protein p23 (Tebp) mRNA.                                                       |
| sc056372.5_328-S   | 1.20                | 0.94              | 1.60               | 1.00                  | 0.78                | 1.04                 | -0.26               | -0.28             | -0.64              | 1110004F10Rik | NM_019772.1  | Mus musculus RIKEN cDNA 1110004F10 gene (1110004F10Rik) mRNA.                                                  |
| sc056382.1_318-S   | 1.05                | 0.98              | 1.33               | 0.98                  | 0.84                | 1.07                 | -0.11               | -0.22             | -0.32              | Rab9          | NM_019773.1  | Mus musculus RAB9 member RAS oncogene family (Rab9) mRNA.                                                      |
| sc056399.1_113-S   | 0.91                | 0.98              | 1.36               | 0.73                  | 0.84                | 1.08                 | -0.31               | -0.22             | -0.33              | Akap8         | NM_019774.2  | Mus musculus A kinase (PRKA) anchor protein 8 (Akap8) mRNA.                                                    |
| sc056812.4_0-S     | 0.95                | 1.05              | 1.44               | 0.85                  | 0.80                | 1.27                 | -0.15               | -0.39             | -0.19              | Pfn5          | NM_020031.1  | Mus musculus profilin 5 (Pfn5) mRNA.                                                                           |
| sc056748.8_105-S   | 1.01                | 1.08              | 1.17               | 0.89                  | 0.82                | 0.97                 | -0.19               | -0.40             | -0.28              | Hirp5         | NM_020045.1  | Mus musculus histone cell cycle regulation defective interacting protein 5 (Hirp5) mRNA.                       |
| sc057294.3_33-S    | 0.92                | 1.11              | 1.35               | 0.85                  | 0.89                | 1.21                 | -0.11               | -0.33             | -0.16              | Rps27         | NM_027015.1  | Mus musculus ribosomal protein S27 (Rps27) mRNA.                                                               |
| sc057437.1_41-S    | 1.02                | 1.00              | 1.49               | 0.78                  | 0.78                | 1.21                 | -0.39               | -0.36             | -0.30              | Golg97        | NM_020585.1  | Mus musculus golgi autotransfer golgin subfamily A 7 (Golg97) mRNA.                                            |
| sc057808.2_82-S    | 0.97                | 1.15              | 1.38               | 0.90                  | 0.97                | 1.03                 | -0.11               | -0.26             | -0.43              | Rpl35a        | NM_021338.2  | Mus musculus ribosomal protein L35a (Rpl35a) mRNA.                                                             |
| sc057814.2_66-S    | 1.04                | 0.99              | 1.14               | 0.98                  | 0.80                | 1.04                 | -0.08               | -0.30             | -0.14              | Kcne4         | NM_021342.1  | Mus musculus potassium voltage-gated channel Isk-related subfamily 4 (Kcne4) mRNA.                             |
| sc058172.1_30-S    | 1.01                | 1.04              | 1.54               | 0.87                  | 0.96                | 1.13                 | -0.21               | -0.12             | -0.44              | Sertad2       | NM_021372.1  | Mus musculus SERTA domain containing 2 (Sertad2) mRNA.                                                         |
| sc058523.22_30-S   | 0.90                | 1.03              | 1.38               | 0.87                  | 0.84                | 1.28                 | -0.06               | -0.37             | -0.32              | Stalip1       | NM_021448.2  | Mus musculus signal transducer and activator of transcription interacting protein 1 (Stalip1) mRNA.            |
| sc058581.1_20-S    | 0.97                | 1.10              | 1.41               | 0.88                  | 0.84                | 1.06                 | -0.15               | -0.27             | -0.42              | Akr1a1        | NM_021472.2  | Mus musculus Aldo-keto reductase family 1 member A4 (aldohyde reductase) (Akr1a1) mRNA.                        |
| sc059079.1_41-S    | 0.97                | 1.13              | 1.48               | 0.86                  | 0.98                | 1.01                 | -0.16               | -0.20             | -0.57              | Erb2b2p       | XM_358312.1  | Mus musculus ErbB2 interacting protein (Erb2b2p) mRNA.                                                         |
| sc059287.1_209-S   | 1.03                | 1.08              | 1.29               | 0.97                  | 0.86                | 1.08                 | -0.08               | -0.32             | -0.26              | Ncstn         | NM_021607.2  | Mus musculus nicastrin (Ncstn) mRNA.                                                                           |
| sc060361.6_3-S     | 1.15                |                   |                    |                       |                     |                      |                     |                   |                    |               |              |                                                                                                                |

| Gene Name          | Control<br>18 Hours | Control<br>1 Week | Control<br>4 Weeks | Treatment<br>18 Hours | Treatment<br>1 Week | Treatment<br>4 Weeks | Log2 FC<br>18 Hours | Log2 FC<br>1 Week | Log2 FC<br>4 Weeks | Symbol        | Accession    | Definition                                                                               |
|--------------------|---------------------|-------------------|--------------------|-----------------------|---------------------|----------------------|---------------------|-------------------|--------------------|---------------|--------------|------------------------------------------------------------------------------------------|
| scd066976.9 299-S  | 1.04                | 0.99              | 1.20               | 0.96                  | 0.77                | 1.04                 | -0.12               | -0.38             | -0.21              | 2410002F23Rik | NM_025880.3  | Mus musculus RIKEN cDNA 2410002F23 gene (2410002F23Rik) mRNA.                            |
| scd067091.5 7-S    | 0.94                | 1.16              | 1.17               | 0.93                  | 0.90                | 1.09                 | -0.02               | -0.36             | -0.28              | 1810073E21Rik | NM_025960.2  | Mus musculus RIKEN cDNA 1810073E21 gene (1810073E21Rik) mRNA.                            |
| scd067106.7 0-S    | 1.09                | 1.03              | 1.22               | 0.94                  | 0.80                | 0.91                 | -0.21               | -0.35             | -0.44              | Arch          | NM_025970.1  | Mus musculus archease (Arch) mRNA.                                                       |
| scd067116.1 6-S    | 0.87                | 1.04              | 1.20               | 0.80                  | 0.94                | 1.09                 | -0.12               | -0.15             | -0.14              | Cuedc2        | NM_024192.1  | Mus musculus CUE domain containing 2 (Cuedc2) mRNA.                                      |
| scd067180.1 177-S  | 1.11                | 0.98              | 1.38               | 1.01                  | 0.78                | 0.98                 | -0.14               | -0.28             | -0.50              | 261031119Rik  | NM_026311.2  | Mus musculus RIKEN cDNA 261031119 gene (261031119Rik) mRNA.                              |
| scd067201.1 106-S  | 1.04                | 1.01              | 1.33               | 0.91                  | 0.73                | 0.99                 | -0.21               | -0.47             | -0.44              | 2700085E05Rik | NM_026292.1  | Mus musculus RIKEN cDNA 2700085E05 gene (2700085E05Rik) mRNA.                            |
| scd067245.8 3-S    | 0.95                | 1.18              | 1.54               | 0.84                  | 0.95                | 1.34                 | -0.19               | -0.30             | -0.21              | Pel1          | NM_030015.1  | Mus musculus pelino 1 (Pel1) mRNA.                                                       |
| scd067345.15 210-S | 0.93                | 1.15              | 1.46               | 0.76                  | 0.88                | 1.22                 | -0.27               | -0.38             | -0.26              | 1700056O17Rik | NM_026101.2  | Mus musculus RIKEN cDNA 1700056O17 gene (1700056O17Rik) mRNA.                            |
| scd067374.11 26-S  | 0.95                | 1.03              | 1.19               | 0.96                  | 0.77                | 1.01                 | 0.00                | -0.41             | -0.23              | Jam2          | NM_023844.2  | Mus musculus junction adhesion molecule 2 (Jam2) mRNA.                                   |
| scd067437.2 28-S   | 1.09                | 1.04              | 1.41               | 0.96                  | 0.86                | 1.08                 | -0.18               | -0.27             | -0.40              | Ser3          | NM_026155.1  | Mus musculus signal sequence receptor gamma (Ser3) mRNA.                                 |
| scd067440.9 18-S   | 1.04                | 1.06              | 1.39               | 0.87                  | 0.94                | 1.09                 | -0.24               | -0.18             | -0.35              | Papd1         | NM_026157.1  | Mus musculus PAF associated domain containing 1 (Papd1) mRNA.                            |
| scd067454.6 320-S  | 1.02                | 1.03              | 1.21               | 0.91                  | 0.87                | 1.03                 | -0.27               | -0.28             | -0.28              | 130009F10Rik  | NM_026156.1  | Mus musculus RIKEN cDNA 130009F10 gene (130009F10Rik) mRNA.                              |
| scd067529.7 122-S  | 0.87                | 1.12              | 1.59               | 0.82                  | 0.90                | 1.30                 | -0.10               | -0.31             | -0.29              | Fgfr1tp2      | NM_026218.1  | Mus musculus FGFR1 oncogene partner 2 (Fgfr1tp2) mRNA.                                   |
| scd067771.9 126-S  | 1.25                | 0.87              | 1.70               | 1.09                  | 0.78                | 1.08                 | -0.21               | -0.16             | -0.67              | Arcp5         | XM_123523.1  | Mus musculus actin related protein 2/3 complex subunit 5 (Arcp5) mRNA.                   |
| scd067772.1 248-S  | 0.95                | 1.10              | 1.20               | 0.94                  | 0.92                | 1.15                 | -0.01               | -0.26             | -0.07              | Chd8          | NM_026137.1  | Mus musculus RIKEN cDNA 6330577E15 gene (6330577E15Rik) mRNA.                            |
| scd067788.3 30-S   | 0.99                | 1.06              | 1.30               | 0.85                  | 0.93                | 1.05                 | -0.22               | -0.19             | -0.32              | 6330577E15Rik | NM_026377.1  | Mus musculus polyadenylate-binding protein-interacting protein 2 (Paip2) mRNA.           |
| scd067869.4 264-S  | 0.99                | 1.01              | 1.36               | 0.74                  | 0.85                | 1.20                 | -0.42               | -0.26             | -0.33              | Naif5         | NM_026420.1  | Mus musculus N-acetyltransferase 5 (ARD1) homolog S. cerevisiae (Naif5) mRNA.            |
| scd067877.6 19-S   | 0.97                | 1.01              | 1.38               | 0.85                  | 0.81                | 1.09                 | -0.19               | -0.31             | -0.20              | Naif5         | NM_026425.1  | Mus musculus RIKEN cDNA 150001K16Rik                                                     |
| scd067885.2 20-S   | 1.01                | 1.03              | 1.23               | 0.93                  | 0.91                | 1.02                 | -0.11               | -0.16             | -0.27              | 57305O2D15Rik | NM_026485.1  | Mus musculus RIKEN cDNA 57305O2D15 gene (57305O2D15Rik) mRNA.                            |
| scd067976.11 22-S  | 1.03                | 1.08              | 1.13               | 1.04                  | 0.80                | 0.91                 | 0.02                | -0.41             | -0.31              | Glsr2         | NM_133831.1  | Mus musculus glioma tumor suppressor candidate region gene 2 (Glsr2) mRNA.               |
| scd068077.3 0-S    | 0.97                | 1.18              | 1.42               | 0.94                  | 0.92                | 0.97                 | -0.05               | -0.37             | -0.58              | Glsr2         | NM_133831.1  | Mus musculus eukaryotic translation initiation factor 3 subunit 3 (gamma) (Eif3a3) mRNA. |
| scd068135.3 22-S   | 0.92                | 1.01              | 1.35               | 0.78                  | 0.86                | 1.15                 | -0.25               | -0.23             | -0.24              | Eif3a3        | NM_080635.1  | Mus musculus RIKEN cDNA 4933421H10Rik                                                    |
| scd068178.1 250-S  | 1.17                | 1.09              | 1.26               | 1.00                  | 0.83                | 0.95                 | -0.22               | -0.38             | -0.48              | 4933421H10Rik | NM_026599.3  | Mus musculus RIKEN cDNA 6430559E15Rik                                                    |
| scd068180.6 62-S   | 1.02                | 1.07              | 1.19               | 1.01                  | 0.68                | 0.96                 | -0.02               | -0.65             | -0.31              | 6430559E15Rik | XM_131537.4  | Mus musculus RIKEN cDNA 4930584N22Rik                                                    |
| scd068276.1 0-S    | 0.92                | 1.03              | 1.23               | 0.83                  | 0.91                | 1.08                 | -0.14               | -0.17             | -0.18              | 4930584N22Rik | NM_026654.1  | Mus musculus RIKEN cDNA 4930584N22 gene (4930584N22Rik) mRNA.                            |
| scd068436.2 19-S   | 0.90                | 0.98              | 1.32               | 0.82                  | 0.90                | 1.25                 | -0.13               | -0.27             | -0.12              | 100001I22Rik  | NM_026657.1  | Mus musculus RIKEN cDNA 1110019L22Rik                                                    |
| scd068453.4 14-S   | 1.01                | 0.96              | 1.22               | 0.92                  | 0.93                | 1.04                 | -0.06               | -0.28             | -0.23              | Gubp1         | XM_128001.2  | Mus musculus RIKEN cDNA 1110019L22 gene (1110019L22Rik) mRNA.                            |
| scd068530.1 6-S    | 1.07                | 1.06              | 1.15               | 1.01                  | 0.93                | 0.87                 | -0.09               | -0.17             | -0.40              | 1110019L22Rik | NM_026756.1  | Mus musculus serine hydrolase-like (Serh) mRNA.                                          |
| scd068559.1 22-S   | 1.08                | 1.02              | 1.32               | 1.02                  | 0.84                | 1.11                 | -0.08               | -0.28             | -0.26              | Pdpr1         | NM_178939.1  | Mus musculus open reading frame 19 (ORF19) mRNA.                                         |
| scd068607.0 2-S    | 1.04                | 1.08              | 1.19               | 0.95                  | 0.88                | 0.92                 | -0.13               | -0.28             | -0.36              | Serh1         | NM_023475.2  | Mus musculus RIKEN cDNA 1110054N06Rik                                                    |
| scd068767.0 282-S  | 1.07                | 1.04              | 1.17               | 0.93                  | 0.84                | 0.88                 | -0.20               | -0.31             | -0.42              | ORF19         | XM_128709.4  | Mus musculus RIKEN cDNA 1110054N06 gene (1110054N06Rik) mRNA.                            |
| scd068839.1 117-S  | 0.99                | 1.08              | 1.34               | 0.83                  | 0.78                | 1.14                 | -0.25               | -0.46             | -0.23              | 1110054N06Rik | NM_175134.2  | Mus musculus tubby like protein 4 (Tup4) mRNA.                                           |
| scd068942.1 129-S  | 1.04                | 1.05              | 1.29               | 0.92                  | 0.97                | 1.19                 | -0.16               | -0.40             | -0.40              | Tup4          | NM_054400.1  | Mus musculus Ras homolog enriched in brain like 1 (Rheb1) mRNA.                          |
| scd068977.0 34-S   | 1.10                | 0.96              | 1.42               | 0.92                  | 0.93                | 1.04                 | -0.05               | -0.24             | -0.04              | Psmc11        | NM_178616.2  | Mus musculus sorting nexin 5 (Snx5) mRNA.                                                |
| scd069159.1 237-S  | 0.98                | 1.09              | 1.22               | 0.95                  | 0.87                | 1.01                 | -0.04               | -0.32             | -0.27              | Rheb1         | NM_026667.3  | Mus musculus translocation protein 1 (Tloc1) mRNA.                                       |
| scd069178.1 5-S    | 1.01                | 1.04              | 1.61               | 0.85                  | 0.76                | 1.22                 | -0.25               | -0.45             | -0.40              | Snx5          | NM_024225.2  | Mus musculus RIKEN cDNA 2300006M17Rik                                                    |
| scd069276.9 236-S  | 1.12                | 0.93              | 1.67               | 0.95                  | 0.77                | 1.20                 | -0.23               | -0.28             | -0.50              | Tloc1         | NM_027016.1  | Mus musculus RIKEN cDNA 2300006M17 gene (2300006M17Rik) mRNA.                            |
| scd069466.1 2-S    | 0.99                | 1.01              | 1.27               | 0.96                  | 0.78                | 1.05                 | -0.03               | -0.38             | -0.27              | 2300006M17Rik | XM_127388.3  | Mus musculus disabled homolog 2 (Drosophila) interacting protein (Dab2ip) mRNA.          |
| scd069601.7 240-S  | 1.07                | 1.02              | 1.23               | 0.95                  | 0.78                | 1.06                 | -0.17               | -0.38             | -0.22              | Dab2ip        | NM_001001602 | Mus musculus RIKEN cDNA 2310037I24Rik                                                    |
| scd069612.1 312-S  | 1.07                | 1.04              | 1.53               | 0.86                  | 0.78                | 1.05                 | -0.31               | -0.40             | -0.55              | 2310037I24Rik | NM_133714.2  | Mus musculus polymerase (DNA-directed) delta 4 (Fod4) mRNA.                              |
| scd069745.1 205-S  | 1.06                | 1.01              | 1.19               | 0.97                  | 0.95                | 1.03                 | -0.02               | -0.24             | -0.04              | Fod4          | NM_027115.2  | Mus musculus cytochrome P450 family 4 subfamily 1 polypeptide 16 (Cyp4f16) mRNA.         |
| scd070093.11 3-S   | 1.05                | 1.08              | 1.33               | 0.91                  | 0.83                | 1.16                 | -0.21               | -0.37             | -0.19              | Ube2g         | NM_027315.2  | Mus musculus RIKEN cDNA 1300003K24Rik                                                    |
| scd070101.13 56-S  | 1.15                | 1.06              | 1.33               | 1.09                  | 0.78                | 1.00                 | -0.08               | -0.46             | -0.42              | Cyp4f16       | NM_024442.1  | Mus musculus RIKEN cDNA 1300003K24 gene (1300003K24Rik) mRNA.                            |
| scd071750.18 235-S | 1.12                | 1.10              | 1.32               | 0.98                  | 0.87                | 0.85                 | -0.19               | -0.33             | -0.66              | 1300003K24Rik | NM_027900.2  | Mus musculus RIKEN cDNA 1110007C02Rik                                                    |
| scd071784.1 62-S   | 0.92                | 1.27              | 1.28               | 0.86                  | 0.98                | 1.13                 | -0.09               | -0.37             | -0.16              | 1110007C02Rik | NM_027923.1  | Mus musculus RIKEN cDNA 2400003C14Rik                                                    |
| scd071955.1 257-S  | 0.99                | 1.06              | 1.44               | 0.81                  | 0.83                | 1.16                 | -0.30               | -0.35             | -0.30              | 2400003C14Rik | NM_028018.1  | Mus musculus RIKEN cDNA 2010308M01Rik                                                    |
| scd072121.12 86-S  | 1.11                | 1.06              | 1.19               | 0.94                  | 0.77                | 1.00                 | -0.23               | -0.46             | -0.25              | 2010308M01Rik | XM_131083.2  | Mus musculus RIKEN cDNA 2610044C15Rik                                                    |
| scd072139.1 117-S  | 1.02                | 1.03              | 1.27               | 0.94                  | 0.98                | 1.08                 | -0.12               | -0.41             | -0.26              | 2610044C15Rik | NM_153714.2  | Mus musculus RIKEN cDNA 2610019A05Rik                                                    |
| scd072149.1 20-S   | 0.97                | 1.02              | 1.08               | 1.00                  | 0.86                | 0.05                 | -0.03               | -0.43             | -0.32              | 2610019A05Rik | NM_028126.1  | Mus musculus RIKEN cDNA 2600013N14Rik                                                    |
| scd072201.1 290-S  | 0.97                | 1.02              | 1.28               | 0.85                  | 0.84                | 1.12                 | -0.20               | -0.28             | -0.19              | 2600013N14Rik | NM_152812.1  | Mus musculus translocating chain-associating membrane protein 1 (Tram1) mRNA.            |
| scd072265.1 70-S   | 1.01                | 1.07              | 1.22               | 0.93                  | 0.89                | 0.88                 | -0.12               | -0.26             | -0.49              | Tram1         | NM_028173.1  | Mus musculus prostate stem cell antigen (Psc) mRNA.                                      |
| scd072373.3 313-S  | 0.95                | 1.02              | 1.12               | 1.12                  | 0.98                | 1.02                 | 0.24                | -0.06             | -0.14              | Psc           | NM_028216.1  | Mus musculus ribosomal protein S6 kinase polypeptide 1 (Rps6kb1) mRNA.                   |
| scd072508.1 0-S    | 0.87                | 0.93              | 1.04               | 0.94                  | 1.18                | 1.12                 | 0.12                | 0.34              | 0.11               | Rps6kb1       | NM_028259.1  | Mus musculus RIKEN cDNA 2700050F09Rik                                                    |
| scd072587.6 94-S   | 1.01                | 1.13              | 1.39               | 0.91                  | 0.96                | 1.02                 | -0.16               | -0.23             | -0.45              | 2700050F09Rik | NM_028291.2  | Mus musculus RIKEN cDNA 2700094L05Rik                                                    |
| scd072654.6 7-S    | 1.00                | 1.03              | 1.27               | 0.93                  | 0.91                | 1.12                 | -0.11               | -0.12             | -0.33              | 2700094L05Rik | NM_028312.1  | Mus musculus RIKEN cDNA 2810036L13Rik                                                    |
| scd072686.1 177-S  | 0.97                | 1.07              | 1.28               | 0.85                  | 0.88                | 1.13                 | -0.19               | -0.28             | -0.16              | Usp24         | XM_131556.5  | Mus musculus RIKEN cDNA 2810036L13 gene (2810036L13Rik) mRNA.                            |
| scd072692.1 23-S   | 0.94                | 1.13              | 1.29               | 0.77                  | 1.01                | 1.03                 | -0.28               | -0.17             | -0.69              | 2810036L13Rik | NM_144802.2  | Mus musculus RIKEN cDNA 2810457I06Rik                                                    |
| scd072828.1 4-S    | 1.24                | 1.02              | 1.41               | 0.89                  | 0.74                | 0.90                 | -0.48               | -0.48             | -0.69              | 2810457I06Rik | NM_176860.3  | Mus musculus RIKEN cDNA 1600027N09Rik                                                    |
| scd073247.26 162-S | 1.09                | 1.01              | 1.39               | 0.93                  | 0.78                | 0.97                 | -0.23               | -0.35             | -0.51              | 1600027N09Rik | XM_130743.3  | Mus musculus estrogen-related receptor beta like 1 (Esrrb1) mRNA.                        |
| scd073916.11 86-S  | 0.99                | 1.09              | 1.32               | 0.92                  | 0.89                | 0.98                 | -0.11               | -0.29             | -0.46              | Esrrb1        | NM_028680    | Mus musculus hec domain and HLD 3 (Hec3) mRNA.                                           |
| scd073998.24 21-S  | 1.00                | 1.06              | 1.37               | 0.97                  | 0.80                | 1.00                 | -0.08               | -0.40             | -0.48              | Hec3          | NM_028705.2  | Mus musculus RIKEN cDNA 2700094L05Rik                                                    |
| scd074098.7 10-S   | 0.98                | 1.07              | 1.11               | 0.94                  | 0.78                | 0.98                 | -0.06               | -0.45             | -0.16              | 0610037L13Rik | NM_028734.1  | Mus musculus RIKEN cDNA 2810037L13Rik                                                    |
| scd074255.2 27-S   | 0.98                | 1.06              | 1.33               | 0.87                  | 0.84                | 1.14                 | -0.17               | -0.34             | -0.28              | Snu1          | NM_021535.2  | Mus musculus RIKEN cDNA 1110005A03Rik                                                    |
| scd074319.4 0-S    | 0.95                | 1.07              | 1.51               | 0.89                  | 0.88                | 1.26                 | -0.10               | -0.28             | -0.27              | 1110005A03Rik | NM_028885    | Mus musculus RIKEN cDNA 2210412K09Rik                                                    |
| scd074775.1 71-S   | 0.98                | 1.05              | 1.22               | 0.90                  | 0.76                | 1.04                 | -0.12               | -0.46             | -0.23              | D15End735e    | NM_029098.2  | Mus musculus RIKEN cDNA 5033406L14Rik                                                    |
| scd075267.1 5-S    | 0.88                | 1.12              | 1.25               | 0.77                  | 0.79                | 1.08                 | -0.19               | -0.51             | -0.21              | 4930555L03Rik | NM_204030.1  | Mus musculus eukaryotic translation initiation factor 4B (Eif4b) mRNA.                   |
| scd075705.2 53-S   | 1.00                | 1.08              | 1.52               | 0.85                  | 0.89                | 1.08                 | -0.23               | -0.27             | -0.48              | Eif4b         | NM_145625.1  | Mus musculus serine/arginine repetitive matrix 2 (Srm2) mRNA.                            |
| scd075956.6 20-S   | 0.84                | 1.12              | 1.28               | 0.79                  | 0.74                | 1.17                 | -0.07               | -0.59             | -0.13              | Srm2          | NM_175229.2  | Mus musculus RIKEN cDNA 5033406L14 gene (5033406L14Rik) mRNA.                            |
| scd075965.1 13-S   | 0.95                | 1.09              | 1.40               | 0.85                  | 0.92                | 1.18                 | -0.15               | -0.24             | -0.24              | 5033406L14Rik | NM_029492.2  | Mus musculus RIKEN cDNA 6330578E17Rik                                                    |
| scd076178.1 20-S   | 1.22                | 0.94              | 1.30               | 1.03                  | 0.72                | 1.01                 | -0.26               | -0.39             | -0.36              | 6330578E17Rik | NM_198006.1  | Mus musculus ATPase Class VI type 11B (Atp11b) mRNA.                                     |
| scd076295.3 96-S   | 0.97                | 1.09              | 1.31               | 0.83                  | 0.90                | 1.10                 | -0.23               | -0.28             | -0.26              | Atp11b        | XM_358349.1  | Mus musculus RIKEN cDNA 2210412K09Rik                                                    |
| scd076846.5 166-S  | 1.02                | 1.14              | 1.39               | 0.88                  | 0.94                | 1.02                 | -0.20               | -0.28             | -0.47              | 3010033P07Rik | NM_029767.1  | Mus musculus small nuclear RNA activating complex polypeptide 3 (Snaccp3) mRNA.          |
| scd076959.8 48-S   | 0.90                | 1.04              | 1.30               | 0.81                  | 0.87                | 1.17                 | -0.15               | -0.26             | -0.16              | 2210412K09Rik | NM_029814.1  | Mus musculus RIKEN cDNA 4931408L03Rik                                                    |
| scd077634.9 5-S    | 1.05                | 1.01              | 1.34               | 0.86                  | 0.94                | 1.06                 | -0.28               | -0.10             | -0.36              | Snaccp3       | NM_029949.1  | Mus musculus RIKEN cDNA 4931408L03 gene (4931408L03Rik) mRNA.                            |
| scd078266.1 82-S   | 1.00                | 1.04              | 1.09               | 1.03                  | 0.88                | 0.82                 | 0.05                | -0.24             | -0.40              | 4931408L03Rik | NM_030074.1  | Mus musculus ribonuclease A family member 6 (Rna6) mRNA.                                 |
| scd078416.2 288-S  | 0.90                | 1.13              | 1.42               | 0.90                  | 0.80                | 1.15                 | -0.01               | -0.49             | -0.29              | Rna6          | NM_030696.1  | Mus musculus bromodomain containing 8 (Brd8) mRNA.                                       |
| scd078556.1 42-S   | 1.20                | 1.07              | 1.27               | 0.93                  |                     |                      |                     |                   |                    |               |              |                                                                                          |

| Gene Name            | Control<br>18 Hours | Control<br>1 Week | Control<br>4 Weeks | Treatment<br>18 Hours | Treatment<br>1 Week | Treatment<br>4 Weeks | Log2 FC<br>18 Hours | Log2 FC<br>1 Week | Log2 FC<br>4 Weeks | Symbol        | Accession   | Definition                                                                                                      |
|----------------------|---------------------|-------------------|--------------------|-----------------------|---------------------|----------------------|---------------------|-------------------|--------------------|---------------|-------------|-----------------------------------------------------------------------------------------------------------------|
| scd16285.6_248-S     | 0.86                | 1.19              | 1.47               | 0.86                  | 0.80                | 1.25                 | -0.02               | -0.57             | -0.24              | E430019B13Rik | NM_172842.2 | Mus musculus RIKEN cDNA E430019B13 gene (E430019B13Rik) mRNA.                                                   |
| scd16317.12_198-S    | 0.99                | 1.10              | 1.22               | 0.86                  | 0.72                | 1.03                 | -0.19               | -0.60             | -0.20              | Mapkapk2      | NM_008551.1 | Mus musculus MAP kinase-activated protein kinase 2 (Mapkapk2) mRNA.                                             |
| scd16421.1_15-S      | 0.98                | 1.00              | 1.25               | 0.89                  | 0.78                | 1.13                 | -0.15               | -0.34             | -0.13              | Bcl2          | NM_009741.2 | Mus musculus B-cell leukemia/lymphoma 2 (Bcl2) mRNA.                                                            |
| scd16442.5_26-S      | 1.08                | 1.00              | 1.80               | 0.87                  | 0.89                | 1.23                 | -0.31               | -0.17             | -0.40              | D1Erd622e     | NM_133825.2 | Mus musculus DNA segment Chr 1 ERATO D6 622 expressed (D1Erd622e) mRNA.                                         |
| scd16460.33_2-S      | 1.12                | 0.89              | 1.40               | 0.81                  | 0.77                | 0.85                 | -0.15               | -0.21             | -0.35              | Scp2          | NM_133832.2 | Mus musculus scute derivativen response (Scp2) mRNA.                                                            |
| scd16496.1_30-S      | 0.97                | 1.09              | 1.24               | 0.89                  | 0.85                | 1.03                 | -0.12               | -0.34             | -0.27              | Arl7          | NM_177305.2 | Mus musculus high density lipoprotein (HDL) binding protein (HdLp) mRNA.                                        |
| scd16683.4_266-S     | 1.10                | 1.04              | 1.18               | 0.95                  | 0.87                | 0.94                 | -0.20               | -0.26             | -0.26              | 2310038H17Rik | NM_025964.2 | Mus musculus RIKEN cDNA 2310038H17 gene (2310038H17Rik) mRNA.                                                   |
| scd16734.10.1_6-S    | 0.91                | 1.22              | 1.67               | 0.78                  | 0.92                | 1.40                 | -0.24               | -0.40             | -0.25              | Cik1          | NM_009905.1 | Mus musculus transcription elongation factor B (SII) polypeptide 1 (Tceb1) mRNA.                                |
| scd16965.6_134-S     | 0.94                | 1.03              | 1.28               | 0.84                  | 0.88                | 1.16                 | -0.16               | -0.23             | -0.14              | Tceb1         | NM_026456.2 | Mus musculus transcription elongation factor B (SII) polypeptide 1 (Tceb1) mRNA.                                |
| scd17217.5.1_10-S    | 0.96                | 1.13              | 1.38               | 0.88                  | 0.78                | 1.26                 | -0.12               | -0.50             | -0.14              | Cd84          | NM_013489.1 | Mus musculus CD84 antigen (Cd84) mRNA.                                                                          |
| scd17219.5.1_76-S    | 1.11                | 0.90              | 1.55               | 0.93                  | 0.70                | 1.04                 | -0.27               | -0.35             | -0.61              | Cd48          | NM_007649.2 | Mus musculus CD48 antigen (Cd48) mRNA.                                                                          |
| scd17355.9_0-S       | 1.00                | 1.15              | 1.52               | 0.84                  | 0.76                | 1.18                 | -0.18               | -0.58             | -0.38              | GluT          | NM_015311.2 | Mus musculus glutamate transporters (glutamine synthase) (GluT) mRNA.                                           |
| scd17491.6.1_47-S    | 1.00                | 1.05              | 1.24               | 0.93                  | 0.80                | 1.11                 | -0.11               | -0.40             | -0.15              | Rab7i1        | NM_144875.1 | Mus musculus RAB7 member RAS oncogene family-like 1 (Rab7i1) mRNA.                                              |
| scd17495.7_75-S      | 1.04                | 1.20              | 1.27               | 0.94                  | 0.88                | 0.86                 | -0.15               | -0.45             | -0.58              | 5430435G22Rik | NM_145509   | Mus musculus RIKEN cDNA 5430435G22 gene (5430435G22Rik) mRNA.                                                   |
| scd17705.24.1_1-S    | 0.96                | 1.09              | 1.19               | 0.93                  | 0.88                | 1.12                 | -0.05               | -0.31             | -0.08              | 4930429A22Rik | NM_153530.1 | Mus musculus RIKEN cDNA 4930429A22 gene (4930429A22Rik) mRNA.                                                   |
| scd17725.6_585-S     | 1.02                | 0.96              | 1.25               | 0.87                  | 0.73                | 1.07                 | -0.24               | -0.40             | -0.23              | Ilm2c         | NM_022417.1 | Mus musculus integral membrane protein 2C (Ilm2c) mRNA.                                                         |
| scd17747.8_208-S     | 0.92                | 1.19              | 1.45               | 0.84                  | 0.84                | 1.26                 | -0.13               | -0.50             | -0.19              | 4930418P06Rik | NM_029777.2 | Mus musculus RIKEN cDNA 4930418P06 gene (4930418P06Rik) mRNA.                                                   |
| scd17789.7.1_75-S    | 0.87                | 1.15              | 1.33               | 0.89                  | 0.87                | 1.11                 | 0.03                | -0.39             | -0.26              | Cyp27a1       | NM_024564.3 | Mus musculus cytochrome P450 family 27 subfamily A polypeptide 1 (Cyp27a1) mRNA.                                |
| scd17984.2_572-S     | 0.87                | 1.11              | 1.23               | 0.94                  | 0.79                | 1.05                 | -0.03               | -0.49             | -0.23              | Sdr2          | NM_138741.2 | Mus musculus scroto derivativen response (Sdr2) mRNA.                                                           |
| scd18032.14.78_265-S | 0.82                | 1.24              | 1.50               | 0.72                  | 0.85                | 1.19                 | -0.20               | -0.55             | -0.33              | Il18r1        | NM_008355.1 | Mus musculus interleukin 18 receptor 1 (Il18r1) mRNA.                                                           |
| scd18085.12.1_243-S  | 0.96                | 1.14              | 1.21               | 0.87                  | 0.77                | 1.05                 | -0.16               | -0.56             | -0.21              | 9330140K16Rik | NM_183019.1 | Mus musculus RIKEN cDNA 9330140K16 gene (9330140K16Rik) mRNA.                                                   |
| scd18090.14.9_4-S    | 0.99                | 1.12              | 1.42               | 0.94                  | 0.81                | 1.08                 | -0.07               | -0.47             | -0.39              | Pipn18        | NM_011206.1 | Mus musculus protein tyrosine phosphatase non-receptor type 18 (Pipn18) mRNA.                                   |
| scd18196.2_265-S     | 1.08                | 0.96              | 1.19               | 1.06                  | 0.78                | 0.84                 | -0.03               | -0.31             | -0.49              | Sox18         | NM_009236.1 | Mus musculus SRY-box containing gene 18 (Sox18) mRNA.                                                           |
| scd18197.5_22-S      | 1.20                | 0.97              | 1.17               | 0.95                  | 0.72                | 0.87                 | -0.34               | -0.42             | -0.43              | Rgs19         | NM_026446.2 | Mus musculus regulator of G-protein signaling 19 (Rgs19) mRNA.                                                  |
| scd18252.2_62-S      | 1.01                | 1.13              | 1.36               | 0.93                  | 0.91                | 1.05                 | -0.13               | -0.31             | -0.39              | Alp5e         | NM_025983.2 | Mus musculus ATP synthase H <sub>+</sub> transporting mitochondrial F1 complex epsilon subunit (Alp5e) mRNA.    |
| scd18338.8_547-S     | 0.96                | 1.05              | 1.20               | 0.97                  | 0.85                | 1.06                 | -0.13               | -0.30             | -0.30              | Ncoa6         | NM_144852.1 | Mus musculus nuclear receptor coactivator 5 (Ncoa6) mRNA.                                                       |
| scd18344.17.1_25-S   | 1.08                | 1.11              | 1.23               | 0.99                  | 0.79                | 0.98                 | -0.10               | -0.48             | -0.13              | Ptp           | NM_011125.1 | Mus musculus phosphotyrosine transfer protein (Ptp) mRNA.                                                       |
| scd18363.8_35-S      | 1.11                | 0.95              | 1.23               | 0.97                  | 0.74                | 1.00                 | -0.18               | -0.35             | -0.31              | Sdc4          | NM_011521.1 | Mus musculus syndecan 4 (Sdc4) mRNA.                                                                            |
| scd18407.1_27-S      | 1.05                | 0.89              | 1.54               | 0.84                  | 0.64                | 1.06                 | -0.33               | -0.45             | -0.54              | Malb          | NM_010658.2 | Mus musculus v-maf musculoaponeurotic fibrosarcoma oncogene family protein B (avian) (Malb) mRNA.               |
| scd18462.14.1_6-S    | 0.97                | 1.03              | 1.33               | 0.82                  | 0.94                | 1.13                 | -0.26               | -0.13             | -0.25              | Ncoa6         | NM_019825.1 | Mus musculus nuclear receptor coactivator 6 (Ncoa6) mRNA.                                                       |
| scd18519.15.1_30-S   | 1.05                | 1.03              | 1.26               | 0.94                  | 0.82                | 1.00                 | -0.16               | -0.32             | -0.33              | 6330583M11Rik | NM_024465   | Mus musculus RIKEN cDNA 6330583M11 gene (6330583M11Rik) mRNA.                                                   |
| scd18576.11.3_13-S   | 1.01                | 1.02              | 1.57               | 0.91                  | 0.76                | 1.19                 | -0.16               | -0.42             | -0.40              | Snos          | NM_024225.2 | Mus musculus sorting nexin 5 (Snos) mRNA.                                                                       |
| scd18600.25_375-S    | 1.04                | 1.12              | 1.37               | 0.95                  | 0.80                | 1.06                 | -0.06               | -0.31             | -0.38              | Jag1          | NM_03822.2  | Mus musculus jagged 1 (Jag1) mRNA.                                                                              |
| scd18631.16_116-S    | 0.99                | 1.07              | 1.34               | 0.88                  | 0.73                | 1.11                 | -0.16               | -0.53             | -0.16              | Sic23a2       | NM_010452.1 | Mus musculus solute carrier family 23 (nucleoside transporters) member 2 (Sic23a2) mRNA.                        |
| scd18647.1_62-S      | 0.99                | 1.10              | 1.26               | 0.89                  | 0.81                | 1.05                 | -0.14               | -0.44             | -0.26              | Cenpb         | NM_007682.2 | Mus musculus centromere autoantigen B (Cenpb) mRNA.                                                             |
| scd18702.4_379-S     | 1.01                | 0.96              | 1.20               | 0.96                  | 0.67                | 1.01                 | -0.07               | -0.51             | -0.24              | Mal           | NM_010762.2 | Mus musculus myelin and lymphocyte protein T-cell differentiation protein (Mal) mRNA.                           |
| scd18703.6_648-S     | 0.98                | 1.12              | 1.21               | 1.04                  | 0.93                | 0.96                 | 0.08                | -0.27             | -0.34              | 2810405K07Rik | NM_028141   | Mus musculus RIKEN cDNA 2810405K07 gene (2810405K07Rik) mRNA.                                                   |
| scd18742.7_10-S      | 1.02                | 1.08              | 1.32               | 1.00                  | 0.82                | 0.93                 | -0.02               | -0.38             | -0.52              | Sic30a4       | NM_011774   | Mus musculus solute carrier family 30 (zinc transporter) member 4 (Sic30a4) mRNA.                               |
| scd18743.9_129-S     | 1.38                | 0.82              | 1.05               | 1.28                  | 0.55                | 0.63                 | -0.11               | -0.55             | -0.74              | Gatm          | NM_025961.2 | Mus musculus glycine aminotransferase (L-arginine:glycine aminotransferase) (Gatm) mRNA.                        |
| scd18935.13_58-S     | 1.11                | 0.83              | 1.55               | 1.05                  | 0.74                | 0.89                 | -0.08               | -0.17             | -0.63              | Cat           | NM_009604   | Mus musculus catalase (Cat) mRNA.                                                                               |
| scd19104.6_1_16-S    | 1.02                | 1.01              | 1.02               | 1.01                  | 0.92                | 1.11                 | -0.12               | -0.13             | -0.13              | Fkap7         | NM_010222.1 | Mus musculus FKBP7 binding protein 7 (Fkap7) mRNA.                                                              |
| scd19139.14_223-S    | 1.05                | 1.20              | 1.46               | 0.86                  | 0.92                | 1.00                 | -0.30               | -0.37             | -0.53              | Wasip1        | NM_153138.2 | Mus musculus Wiskott-Aldrich syndrome protein interacting protein (Wasip1) mRNA.                                |
| scd19220.16.1_2-S    | 1.03                | 1.02              | 1.34               | 0.90                  | 0.86                | 1.04                 | -0.20               | -0.25             | -0.38              | Ilfih1        | NM_027835.1 | Mus musculus dipeptidylpeptidase 4 (Dpp4) mRNA.                                                                 |
| scd19224.27_390-S    | 0.91                | 1.17              | 1.29               | 0.92                  | 0.74                | 1.06                 | 0.02                | -0.66             | -0.29              | Dpp4          | NM_010074.2 | Mus musculus dipeptidylpeptidase 4 (Dpp4) mRNA.                                                                 |
| scd19291.9.1_25-S    | 1.03                | 0.98              | 1.49               | 0.91                  | 0.79                | 1.16                 | -0.17               | -0.34             | -0.36              | Nmi           | NM_019401.1 | Mus musculus N-myc (and STAT) interactor (Nmi) mRNA.                                                            |
| scd19548.10.1_41-S   | 0.97                | 1.14              | 1.42               | 0.87                  | 0.73                | 1.26                 | -0.16               | -0.63             | -0.18              | Fcna          | NM_007995.2 | Mus musculus ficollin A (Fcna) mRNA.                                                                            |
| scd19775.24.1_150-S  | 1.04                | 1.07              | 1.12               | 0.94                  | 0.91                | 0.99                 | -0.13               | -0.23             | -0.18              | 1700051112Rik | NM_181390.2 | Mus musculus RIKEN cDNA 1700051112 gene (1700051112Rik) mRNA.                                                   |
| scd19785.7_63-S      | 0.87                | 1.12              | 1.25               | 0.84                  | 0.72                | 0.87                 | -0.05               | -0.28             | -0.28              | Cat           | NM_011373.2 | Mus musculus catalase (Cat) mRNA.                                                                               |
| scd19885.7_41-S      | 0.95                | 1.12              | 1.41               | 0.95                  | 0.82                | 1.10                 | -0.14               | -0.36             | -0.36              | Zfp313        | NM_007043.3 | Mus musculus zinc finger protein 313 (Zfp313) mRNA.                                                             |
| scd20002.16.7_10-S   | 1.22                | 1.17              | 0.95               | 1.13                  | 0.78                | 0.77                 | -0.09               | -0.58             | -0.30              | Lbp           | NM_008489   | Mus musculus lipopolysaccharide binding protein (Lbp) mRNA.                                                     |
| scd20092.24_625-S    | 1.08                | 0.98              | 1.18               | 0.96                  | 0.83                | 1.02                 | -0.17               | -0.23             | -0.20              | Dnmt3b        | NM_010068.1 | Mus musculus DNA methyltransferase 3B (Dnmt3b) mRNA.                                                            |
| scd20101.14.1_29-S   | 1.68                | 0.79              | 1.37               | 1.25                  | 0.66                | 0.79                 | -0.52               | -0.24             | -0.83              | Hck           | NM_010407.3 | Mus musculus hemopoietic cell kinase (Hck) mRNA.                                                                |
| scd20107.1_2-S       | 1.35                | 0.92              | 1.10               | 1.20                  | 0.90                | 0.90                 | -0.17               | -0.03             | -0.28              | Ikb1          | NM_010495.1 | Mus musculus inhibitor of DNA binding 1 (Ikb1) mRNA.                                                            |
| scd20124.13_167-S    | 0.94                | 1.02              | 1.14               | 0.88                  | 0.91                | 1.03                 | -0.10               | -0.17             | -0.14              | Cank2a1       | NM_007788.2 | Mus musculus casein kinase II alpha 1 polypeptide (Cank2a1) mRNA.                                               |
| scd20194.20.1_79-S   | 0.93                | 1.06              | 1.06               | 0.93                  | 0.86                | 1.48                 | -0.03               | -0.20             | -0.30              | Sc22b         | NM_01937.2  | Mus musculus SC22B (S. cerevisiae) (Sc22b) mRNA.                                                                |
| scd20277.23_159-S    | 1.06                | 0.97              | 1.48               | 0.97                  | 0.82                | 0.99                 | -0.13               | -0.24             | -0.61              | Ptpra         | NM_008950.1 | Mus musculus protein tyrosine phosphatase receptor type A (Ptpra) mRNA.                                         |
| scd20326.4.1_48-S    | 0.98                | 1.17              | 1.24               | 0.86                  | 0.85                | 1.05                 | -0.19               | -0.43             | -0.24              | Dusp2         | NM_010090.2 | Mus musculus dual specificity phosphatase 2 (Dusp2) mRNA.                                                       |
| scd20357.15.1_26-S   | 1.17                | 1.08              | 1.11               | 0.98                  | 0.77                | 0.84                 | -0.24               | -0.48             | -0.39              | Sgrd1         | NM_021507.4 | Mus musculus sulfide quinone reductase-like (yeast) (Sgrd1) mRNA.                                               |
| scd20390.11.1_18-S   | 1.08                | 0.97              | 1.33               | 1.01                  | 0.79                | 1.06                 | -0.10               | -0.29             | -0.33              | Ccnbp1        | NM_010761.1 | Mus musculus cyclin D-type binding protein 1 (Ccnbp1) mRNA.                                                     |
| scd20502.5_452-S     | 1.14                | 1.08              | 1.31               | 0.99                  | 0.74                | 0.90                 | -0.19               | -0.54             | -0.54              | Lin7c         | NM_011699   | Mus musculus lin 7 homolog c (C. elegans) (Lin7c) mRNA.                                                         |
| scd20622.20_179-S    | 0.92                | 1.10              | 1.25               | 0.87                  | 0.84                | 1.11                 | -0.09               | -0.39             | -0.17              | D030051N19Rik | NM_172669   | Mus musculus RIKEN cDNA D030051N19 gene (D030051N19Rik) mRNA.                                                   |
| scd20647.1_124-S     | 1.06                | 1.02              | 1.30               | 0.97                  | 0.87                | 1.18                 | -0.14               | -0.17             | -0.17              | 630010C038Rik | NM_138016.1 | Mus musculus RIKEN cDNA 630010C038 gene (630010C038Rik) mRNA.                                                   |
| scd20781.3.23_109-S  | 0.96                | 1.10              | 1.33               | 0.81                  | 0.83                | 1.03                 | -0.25               | -0.40             | -0.39              | 1700011J10Rik | NM_183295   | Mus musculus RIKEN cDNA 1700011J10 gene (1700011J10Rik) mRNA.                                                   |
| scd20892.5.1_69-S    | 1.10                | 1.00              | 1.25               | 0.97                  | 0.81                | 1.00                 | -0.19               | -0.31             | -0.32              | 2310032F03Rik | NM_133031.2 | Mus musculus RIKEN cDNA 2310032F03 gene (2310032F03Rik) mRNA.                                                   |
| scd20983.4_177-S     | 0.90                | 1.13              | 1.34               | 0.83                  | 0.86                | 1.12                 | -0.12               | -0.39             | -0.26              | Arpc5l        | NM_028809.1 | Mus musculus actin related protein 2/3 complex subunit 5-like (Arpc5l) mRNA.                                    |
| scd21117.18_194-S    | 0.93                | 1.11              | 1.29               | 0.78                  | 0.87                | 1.10                 | -0.25               | -0.35             | -0.22              | AW060766      | NM_198033.1 | Mus musculus expressed sequence AW060766 (AW060766) mRNA.                                                       |
| scd21165.1.12_85-S   | 1.03                | 1.03              | 1.53               | 0.94                  | 0.73                | 0.97                 | -0.13               | -0.49             | -0.67              | Bmyc          | NM_023326   | Mus musculus brain expressed myelocytomatosis oncogene (Bmyc) mRNA.                                             |
| scd21187.1.18_12-S   | 0.92                | 1.08              | 1.23               | 0.93                  | 0.78                | 1.09                 | 0.02                | -0.47             | -0.16              | C730025P13Rik | NM_177344   | Mus musculus RIKEN cDNA C730025P13 gene (C730025P13Rik) mRNA.                                                   |
| scd21206.2.1_228-S   | 0.91                | 1.14              | 1.47               | 0.86                  | 0.81                | 1.28                 | -0.10               | -0.49             | -0.20              | Br3           | NM_018772.1 | Mus musculus brain protein B3 (Br3) mRNA.                                                                       |
| scd21243.20.1_142-S  | 1.00                | 1.15              | 1.06               | 0.93                  | 0.98                | 0.96                 | -0.10               | -0.24             | -0.15              | Armc3         | NM_130012   | Mus musculus armadillo-like domain containing 3 (Armc3) mRNA.                                                   |
| scd21336.8_145-S     | 0.95                | 1.13              | 1.36               | 0.82                  | 0.89                | 1.19                 | -0.23               | -0.34             | -0.19              | 3110001A13Rik | NM_025626.3 | Mus musculus RIKEN cDNA 3110001A13 gene (3110001A13Rik) mRNA.                                                   |
| scd21394.7_6-S       | 1.18                | 0.97              | 1.53               | 0.89                  | 0.65                | 1.10                 | -0.39               | -0.58             | -0.48              | A430056A10Rik | NM_133871.1 | Mus musculus chloride channel calcium activated 1 (Clca1) mRNA.                                                 |
| scd21422.13.1_102-S  | 1.23                | 0.94              | 1.47               | 0.91                  | 0.67                | 1.10                 | -0.41               | -0.49             | -0.43              | Clca1         | NM_009899.2 | Mus musculus chloride channel calcium activated 1 (Clca1) mRNA.                                                 |
| scd21492.13_316-S    | 0.97                | 1.11              | 1.34               | 0.90                  | 0.95                | 1.14                 | -0.11               | -0.22             | -0.24              | 4933434L15Rik | NM_026231.1 | Mus musculus RIKEN cDNA 4933434L15 gene (4933434L15Rik) mRNA.                                                   |
| scd21762.12_48-S     | 1.03                | 1.09              | 1.22               | 0.93                  | 0.85                | 0.99                 | -0.15               | -0.37             | -0.31              | Csf1          | NM_007778.1 | Mus musculus colony stimulating factor 1 (macrophage) (Csf1) mRNA.                                              |
| scd21680.4_681-S     | 1.14                | 0.89              | 1.04               | 1.01                  | 0.88                | 0.90                 | -0.11               | -0.14             | -0.22              | Kcnk4         | NM_015922   | Mus musculus potassium voltage gated channel slow related 4 (Kcnk4) mRNA.                                       |
| scd21701.9.1_3-S     | 1.04                | 1.04              | 1.23               | 0.91                  | 0.95                | 1.27                 | -0.10               | -0.13             | -0.13              | Alpsf1        | NM_027222.1 | Mus musculus ATP synthase H <sub>+</sub> transporting mitochondrial F0 complex epsilon subunit 1 (Alpsf1) mRNA. |
| scd21821.6.1_24-S    | 0.99                | 1.22              | 1.24               | 0.90                  | 0.88                | 1.00                 | -0.13               | -0.45             | -0.31              | 2810052M02    |             |                                                                                                                 |

| Gene Name           | Control 18 Hours | Control 1 Week | Control 4 Weeks | Treatment 18 Hours | Treatment 1 Week | Treatment 4 Weeks | Log2 FC 18 Hours | Log2 FC 1 Week | Log2 FC 4 Weeks | Symbol        | Accession   | Definition                                                                                          |
|---------------------|------------------|----------------|-----------------|--------------------|------------------|-------------------|------------------|----------------|-----------------|---------------|-------------|-----------------------------------------------------------------------------------------------------|
| scd23434.8.1 51-S   | 1.00             | 1.04           | 1.18            | 0.89               | 0.76             | 0.99              | -0.17            | -0.46          | -0.25           | Mmp23         | NM_011985.1 | Mus musculus matrix metalloproteinase 23 (Mmp23) mRNA.                                              |
| scd23470.4 177-S    | 1.02             | 1.07           | 1.05            | 0.96               | 0.94             | 0.94              | -0.09            | -0.19          | -0.19           | Phf13         | NM_172705.1 | Mus musculus PHD finger protein 13 (Phf13) mRNA.                                                    |
| scd23508.1.1 311-S  | 1.12             | 1.12           | 1.22            | 0.99               | 0.76             | 0.95              | -0.18            | -0.54          | -0.37           | Kif1b         | NM_207682.1 | Mus musculus kinesin family member 1B (Kif1b) transcript variant 1 mRNA.                            |
| scd23525.7 662-S    | 0.96             | 0.98           | 1.25            | 0.98               | 0.78             | 1.11              | 0.03             | -0.46          | -0.18           | Agtrp         | NM_009642.3 | Mus musculus angiotensin II type I receptor-associated protein (Agtrp) mRNA.                        |
| scd23581.4 102-S    | 1.16             | 0.94           | 1.14            | 1.09               | 0.93             | 0.98              | -0.09            | -0.32          | -0.33           | EEF2          | NM_026344.2 | Mus musculus EF hand domain containing 2 (Eef2) mRNA.                                               |
| scd23804.2 553-S    | 1.04             | 0.92           | 1.14            | 1.06               | 0.75             | 0.96              | 0.02             | -0.28          | -0.25           | Gja4          | NM_008120.2 | Mus musculus gap junction membrane channel protein alpha 4 (Gja4) mRNA.                             |
| scd23942.14.1 32-S  | 0.99             | 0.99           | 1.34            | 0.87               | 0.74             | 1.17              | -0.18            | -0.41          | -0.20           | Plk3          | NM_013807.1 | Mus musculus polo-like kinase 3 (Drosophila) (Plk3) mRNA.                                           |
| scd24183.14 264-S   | 1.11             | 1.08           | 1.17            | 0.96               | 0.79             | 0.86              | -0.20            | -0.43          | -0.46           | Nlfb          | NM_008687.2 | Mus musculus nuclear factor I/b (Nlfb) mRNA.                                                        |
| scd24327.50 27-S    | 1.02             | 1.20           | 1.51            | 0.89               | 0.75             | 1.03              | -0.17            | -0.64          | -0.55           | Abca1         | NM_013454.2 | Mus musculus ATP-binding cassette sub-family A (ABC1) member 1 (Abca1) mRNA.                        |
| scd24400.59.1 34-S  | 1.05             | 1.07           | 1.10            | 0.88               | 0.78             | 0.88              | -0.26            | -0.46          | -0.33           | Tin1          | NM_011602.2 | Mus musculus tinman 1 (Tin1) mRNA.                                                                  |
| scd24428.6 231-S    | 0.96             | 0.93           | 1.33            | 0.91               | 0.76             | 1.07              | -0.10            | -0.30          | -0.31           | Wdr40a        | NM_026893.2 | Mus musculus tumor necrosis factor receptor superfamily member 4 (Tnfrsf4) mRNA.                    |
| scd24600.8.1 49-S   | 1.05             | 1.10           | 1.28            | 0.98               | 0.93             | 1.00              | -0.10            | -0.28          | -0.10           | Tnfrsf1       | NM_011616.1 | Mus musculus tumor necrosis factor receptor superfamily member 1 (Tnfrsf1) mRNA.                    |
| scd24615.5 59-S     | 0.97             | 1.04           | 1.20            | 0.96               | 0.80             | 1.05              | -0.02            | -0.38          | -0.19           | 150001116Rik  | NM_026899.1 | Mus musculus RIKEN cDNA 150001116 gene (150001116Rik) mRNA.                                         |
| scd24616.11396 49-S | 0.97             | 1.04           | 1.28            | 1.01               | 0.69             | 1.01              | 0.06             | -0.58          | -0.35           | B930041F14Rik | NM_178699   | Mus musculus RIKEN cDNA B930041F14 gene (B930041F14Rik) mRNA.                                       |
| scd24653.4 122-S    | 0.99             | 1.03           | 1.29            | 0.89               | 0.74             | 1.11              | -0.15            | -0.48          | -0.21           | Rp22          | NM_009079.2 | Mus musculus ribosomal protein L22 (Rp22) mRNA.                                                     |
| scd24663.4 10-S     | 0.97             | 1.16           | 1.43            | 0.84               | 0.85             | 1.22              | -0.20            | -0.44          | -0.23           | 1810045K06Rik | XM_144142.3 | Mus musculus RIKEN cDNA 1810045K06 gene (1810045K06Rik) mRNA.                                       |
| scd24698.3276 229-S | 1.03             | 1.08           | 1.22            | 0.97               | 0.83             | 1.01              | -0.09            | -0.37          | -0.27           | BC035954      | NM_177569.2 | Mus musculus cDNA sequence BC035954 (BC035954) mRNA.                                                |
| scd24737.11 591-S   | 0.96             | 1.04           | 1.29            | 1.01               | 0.95             | 0.93              | 0.06             | -0.14          | -0.47           | Cas9          | NM_015733.3 | Mus musculus caspase 9 (Cas9) mRNA.                                                                 |
| scd24758.271 59-S   | 1.08             | 0.95           | 1.24            | 1.01               | 0.72             | 1.00              | -0.10            | -0.43          | -0.30           | 1110012E06Rik | NM_026903.1 | Mus musculus RIKEN cDNA 1110012E06 gene (1110012E06Rik) mRNA.                                       |
| scd24787.5 366-S    | 0.97             | 1.11           | 1.32            | 0.95               | 0.94             | 1.15              | -0.03            | -0.22          | -0.19           | 051009K11Rik  | NM_026899.3 | Mus musculus RIKEN cDNA 051009K11 gene (051009K11Rik) mRNA.                                         |
| scd24845.5 415-S    | 1.10             | 1.06           | 1.15            | 0.96               | 0.84             | 0.91              | -0.20            | -0.33          | -0.33           | Mpra          | NM_027995.1 | Mus musculus membrane progesterin receptor alpha (Mpra) mRNA.                                       |
| scd24999.4 423-S    | 0.90             | 1.14           | 1.19            | 0.93               | 0.78             | 1.06              | 0.04             | -0.54          | -0.16           | Lmyc1         | NM_008506.2 | Mus musculus lung carcinoma myc related oncogene 1 (Lmyc1) mRNA.                                    |
| scd25114.13.1 11-S  | 1.07             | 1.04           | 1.18            | 0.99               | 0.76             | 0.94              | -0.12            | -0.47          | -0.34           | Spata6        | NM_026470.2 | Mus musculus spermatogenesis associated 6 (Spata6) mRNA.                                            |
| scd25160.11.1 73-S  | 1.00             | 1.08           | 1.16            | 0.90               | 0.82             | 0.94              | -0.15            | -0.40          | -0.31           | C030002N13Rik | NM_145550.1 | Mus musculus RIKEN cDNA C030002N13 gene (C030002N13Rik) mRNA.                                       |
| scd25185.2 323 16-S | 0.92             | 1.05           | 1.34            | 0.99               | 0.92             | 1.18              | -0.11            | -0.19          | -0.19           | Phap2b        | NM_080555.1 | Mus musculus phosphatidic acid phosphatase type 2B (Phap2b) mRNA.                                   |
| scd25278.23 305-S   | 1.05             | 1.11           | 1.17            | 0.85               | 0.81             | 0.95              | -0.30            | -0.45          | -0.30           | Tsk           | NM_025590.1 | Mus musculus endothelial-specific receptor tyrosine kinase (Tsk) mRNA.                              |
| scd25301.21.1 0-S   | 1.02             | 0.99           | 1.28            | 0.99               | 0.78             | 1.01              | -0.20            | -0.34          | -0.45           | Rrag          | NM_013776.2 | Mus musculus Ras-related sequence ALO1697.7 (Alo1697.7) mRNA.                                       |
| scd25451.20.1 292-S | 0.87             | 1.34           | 1.48            | 0.90               | 0.99             | 1.06              | 0.05             | -0.40          | -0.49           | Inva          | NM_010569.2 | Mus musculus invasin (Inva) mRNA.                                                                   |
| scd25513.7.1 27-S   | 1.00             | 0.96           | 1.13            | 0.94               | 0.79             | 1.02              | -0.09            | -0.28          | -0.14           | Creb3         | NM_013497.1 | Mus musculus cAMP responsive element binding protein 3 (Creb3) mRNA.                                |
| scd25525.4 618-S    | 0.99             | 1.02           | 1.17            | 0.98               | 0.80             | 1.03              | -0.02            | -0.34          | -0.18           | Dnaip5        | NM_019874.3 | Mus musculus Dnaip (Hsp40) homolog subfamily B member 5 (Dnaip5) mRNA.                              |
| scd25650.16.1 33-S  | 1.01             | 0.96           | 1.40            | 0.84               | 0.97             | 1.17              | -0.26            | 0.02           | -0.25           | Nbn           | NM_013752.2 | Mus musculus nibrin (Nbn) mRNA.                                                                     |
| scd25676.27 663-S   | 1.02             | 1.07           | 1.22            | 0.88               | 0.94             | 0.98              | -0.21            | -0.18          | -0.31           | 1110037F02Rik | NM_283937.2 | Mus musculus RIKEN cDNA 1110037F02 gene (1110037F02Rik) mRNA.                                       |
| scd25610.5 670-S    | 0.97             | 1.09           | 1.32            | 0.88               | 0.88             | 1.10              | -0.14            | -0.14          | -0.25           | Rbak          | NM_021326.1 | Mus musculus RB-associated KRAE repressor (Rbak) mRNA.                                              |
| scd25830.14 357-S   | 0.95             | 1.14           | 1.32            | 0.90               | 0.84             | 0.95              | -0.08            | -0.43          | -0.30           | 115274.2      | NM_115274.2 | Mus musculus RB-associated KRAE repressor (Rbak) mRNA.                                              |
| scd25921.12.1 22-S  | 1.12             | 1.03           | 1.24            | 1.00               | 0.79             | 0.97              | -0.16            | -0.39          | -0.35           | Tmp1          | NM_172541.1 | Mus musculus transmembrane protein induced by tumor necrosis factor alpha (Tmp1) mRNA.              |
| scd25923.3.1 0-S    | 0.85             | 1.09           | 1.95            | 0.84               | 0.74             | 1.67              | 0.00             | -0.54          | -0.22           | Ccl24         | NM_019577.2 | Mus musculus chemokine (C-C motif) ligand 24 (Ccl24) mRNA.                                          |
| scd25951.11 115-S   | 1.16             | 1.08           | 1.26            | 0.99               | 0.88             | 0.80              | -0.24            | -0.30          | -0.67           | Ncf1          | NM_010876.2 | Mus musculus neutrophil cytosolic factor 1 (Ncf1) mRNA.                                             |
| scd25953.10 428-S   | 0.98             | 1.05           | 1.28            | 0.87               | 0.83             | 1.12              | -0.18            | -0.35          | -0.16           | Wbscr16       | NM_033572.1 | Mus musculus Williams-Beuren syndrome chromosome region 16 homolog (human) (Wbscr16) mRNA.          |
| scd26046.6 19-S     | 1.06             | 1.14           | 1.27            | 0.94               | 0.96             | 0.95              | -0.18            | -0.25          | -0.42           | BC026744      | NM_177876.2 | Mus musculus cDNA sequence BC026744 (BC026744) mRNA.                                                |
| scd26154.16 189-S   | 1.09             | 1.05           | 1.27            | 0.90               | 0.82             | 0.99              | -0.27            | -0.36          | -0.35           | 1220403N09Rik | NM_132032.2 | Mus musculus RIKEN cDNA 1220403N09 gene (1220403N09Rik) mRNA.                                       |
| scd26187.1.1 94-S   | 1.09             | 1.10           | 1.23            | 0.89               | 0.88             | 1.11              | -0.09            | -0.32          | -0.16           | AL01697.7     | NM_15016.1  | Mus musculus Ras-related sequence ALO1697.7 (Alo1697.7) mRNA.                                       |
| scd26190.16 67-S    | 1.05             | 0.98           | 1.19            | 0.91               | 0.86             | 0.94              | -0.22            | -0.19          | -0.35           | Coro1c        | NM_011779.2 | Mus musculus coronin actin binding protein 1C (Coro1c) mRNA.                                        |
| scd26218.7.1 61-S   | 1.13             | 0.97           | 1.51            | 0.93               | 0.84             | 1.11              | -0.27            | -0.21          | -0.45           | AW049829      | NM_153571.1 | Mus musculus expressed sequence AW049829 (AW049829) mRNA.                                           |
| scd26235.9.1 65-S   | 0.92             | 1.14           | 1.14            | 0.88               | 0.82             | 1.01              | -0.09            | -0.46          | -0.17           | Pgbl          | NM_145147   | Mus musculus pseudautosomal GTP binding protein-like like (Pgbl) mRNA.                              |
| scd26323.5.1 40-S   | 1.09             | 0.99           | 1.25            | 0.93               | 0.71             | 1.01              | -0.22            | -0.48          | -0.31           | Plac8         | NM_139198.1 | Mus musculus placenta-specific 8 (Plac8) mRNA.                                                      |
| scd26327.26.63 55-S | 1.09             | 0.95           | 1.08            | 1.03               | 0.79             | 0.85              | -0.08            | -0.24          | -0.35           | Sec31i        | XM_132230.3 | Mus musculus transmembrane protein induced by tumor necrosis factor alpha (Tmp1) mRNA.              |
| scd26495.201 43-S   | 0.95             | 1.15           | 1.15            | 0.88               | 1.00             | 0.91              | -0.10            | -0.20          | -0.35           | Tec           | NM_013699.2 | Mus musculus cytoplasmic tyrosine kinase Dscr28C related (Drosophila) (Tec) mRNA.                   |
| scd26655.5 57-S     | 0.88             | 1.13           | 1.38            | 0.98               | 0.73             | 1.08              | -0.03            | -0.58          | -0.10           | 10174.14      | NM_017414.1 | Mus musculus histone H2b variant (H2buc) mRNA.                                                      |
| scd26735.47.1 86-S  | 1.05             | 1.10           | 1.16            | 0.95               | 0.82             | 1.00              | -0.15            | -0.42          | -0.28           | IT172         | NM_026298.4 | Mus musculus intracellular transport 172 (IT172) mRNA.                                              |
| scd270247.349-S     | 1.05             | 1.19           | 1.27            | 0.97               | 0.71             | 0.95              | -0.11            | -0.75          | -0.42           | Fasn1         | NM_007984.1 | Mus musculus fascin homolog 1 actin bundling protein (Strongylocentrotus purpuratus) (Fasn1) mRNA.  |
| scd27096.8.1 1-S    | 0.92             | 1.08           | 1.14            | 0.96               | 0.93             | 1.01              | 0.06             | -0.22          | -0.18           | 061009M14Rik  | NM_023910.4 | Mus musculus RIKEN cDNA 061009M14 gene (061009M14Rik) mRNA.                                         |
| scd27115.7.1 28-S   | 0.88             | 1.09           | 1.21            | 0.86               | 0.89             | 1.15              | -0.05            | -0.28          | -0.08           | Ttc11         | NM_025562.1 | Mus musculus tetraloop repeat domain 11 (Ttc11) mRNA.                                               |
| scd27135.7 243-S    | 1.03             | 1.01           | 1.50            | 0.86               | 0.76             | 1.13              | -0.28            | -0.41          | -0.41           | Bcl7b         | NM_009745.1 | Mus musculus B-cell CLL/lymphoma 7B (Bcl7b) mRNA.                                                   |
| scd27228.32 300-S   | 0.98             | 1.13           | 1.29            | 0.98               | 0.82             | 0.96              | -0.01            | -0.44          | -0.42           | Hip1r         | NM_145070.2 | Mus musculus huntingtin interacting protein 1 related (Hip1r) mRNA.                                 |
| scd27232.7 27-S     | 0.99             | 1.02           | 1.17            | 0.91               | 0.89             | 1.00              | -0.01            | -0.23          | -0.01           | Denr          | NM_036933.1 | Mus musculus denr-regulated protein 1 (Denr) mRNA.                                                  |
| scd27262.6 658-S    | 0.96             | 1.14           | 1.40            | 0.84               | 0.84             | 1.24              | -0.20            | -0.43          | -0.18           | 9130017A15Rik | NM_177242.3 | Mus musculus RIKEN cDNA 9130017A15 gene (9130017A15Rik) mRNA.                                       |
| scd27294.16.1 239-S | 1.11             | 1.05           | 1.25            | 0.92               | 0.67             | 0.98              | -0.27            | -0.64          | -0.35           | Sic24a6       | NM_133221.1 | Mus musculus solute carrier family 24 (sodium/potassium/calcium exchanger) member 6 (Sic24a6) mRNA. |
| scd27427.17 318-S   | 1.10             | 1.14           | 1.29            | 0.92               | 0.78             | 1.02              | -0.25            | -0.52          | -0.34           | AI428795      | NM_024477.2 | Mus musculus expressed sequence AI428795 (AI428795) mRNA.                                           |
| scd27488.12.1 231-S | 1.12             | 1.02           | 1.21            | 0.97               | 0.95             | 0.94              | -0.20            | -0.09          | -0.38           | Zfp326        | NM_018759.1 | Mus musculus zinc finger protein 326 (Zfp326) mRNA.                                                 |
| scd27567.9 262-S    | 0.95             | 1.21           | 1.48            | 0.82               | 0.88             | 1.15              | -0.22            | -0.46          | -0.37           | Cong2         | NM_007635.2 | Mus musculus cyclin G2 (Cong2) mRNA.                                                                |
| scd27590.3 53-S     | 0.93             | 1.10           | 1.64            | 0.90               | 0.87             | 1.34              | -0.05            | -0.44          | -0.28           | D5End593e     | NM_175096.2 | Mus musculus DNA segment Chr 5 ERATO Doi 593 expressed (D5End593e) mRNA.                            |
| scd27933.28 39-S    | 0.98             | 1.17           | 1.38            | 0.98               | 0.98             | 1.23              | -0.08            | -0.54          | -0.23           | Denr          | NM_010368.1 | Mus musculus denr-regulated protein 1 (Denr) mRNA.                                                  |
| scd28171.231 37-S   | 1.10             | 0.99           | 1.29            | 0.89               | 0.69             | 0.93              | -0.15            | -0.49          | -0.28           | 281045K03Rik  | NM_144517.2 | Mus musculus RIKEN cDNA 281045K03 gene (281045K03Rik) mRNA.                                         |
| scd27857.9 456-S    | 1.07             | 1.00           | 1.14            | 0.94               | 0.76             | 0.98              | -0.20            | -0.40          | -0.23           | Bst1          | NM_009763.1 | Mus musculus bone marrow stromal cell antigen 1 (Bst1) mRNA.                                        |
| scd27954.15 253-S   | 0.91             | 1.09           | 1.32            | 0.87               | 0.85             | 1.16              | -0.08            | -0.36          | -0.19           | Zfp512        | NM_172993   | Mus musculus zinc finger protein 512 (Zfp512) mRNA.                                                 |
| scd27967.7.1 149-S  | 1.04             | 1.05           | 1.26            | 0.93               | 0.89             | 1.11              | -0.16            | -0.25          | -0.17           | Ahdh1         | NM_021304.2 | Mus musculus aldehyde dehydrogenase domain containing 1 (Ahdh1) mRNA.                               |
| scd28069.32.1 8-S   | 1.21             | 1.07           | 1.22            | 1.06               | 0.76             | 0.91              | -0.20            | -0.47          | -0.43           | A530088I07Rik | NM_175437.2 | Mus musculus RIKEN cDNA A530088I07 gene (A530088I07Rik) mRNA.                                       |
| scd28129.1 67-S     | 1.10             | 1.08           | 1.40            | 0.88               | 0.82             | 1.13              | -0.31            | -0.39          | -0.33           | Fzd1          | NM_021457.2 | Mus musculus frizzled homolog 1 (Drosophila) (Fzd1) mRNA.                                           |
| scd28216.21.1 39-S  | 1.03             | 1.07           | 1.16            | 0.97               | 0.95             | 1.08              | -0.09            | -0.22          | -0.38           | Sox5          | NM_011444.1 | Mus musculus SRY-box containing gene 5 (Sox5) mRNA.                                                 |
| scd28272.8.1 7-S    | 1.03             | 0.96           | 1.35            | 0.88               | 0.75             | 1.12              | -0.23            | -0.36          | -0.28           | Arhgdh        | NM_007486.1 | Mus musculus Rho GDP dissociation inhibitor (GDI) beta (Arhgdh) mRNA.                               |
| scd28280.10.1 35-S  | 1.21             | 0.95           | 1.50            | 0.98               | 0.73             | 0.94              | -0.33            | -0.39          | -0.70           | 1100001H23Rik | NM_025806.1 | Mus musculus RIKEN cDNA 1100001H23 gene (1100001H23Rik) mRNA.                                       |
| scd28418.16.1 2-S   | 1.08             | 1.03           | 1.35            | 0.94               | 0.79             | 0.99              | -0.20            | -0.38          | -0.44           | Hcpb          | NM_013545.1 | Mus musculus hemopoietic cell phosphatase (Hcpb) mRNA.                                              |
| scd28548.7 53-S     | 1.22             | 0.89           | 1.40            | 0.98               | 0.62             | 0.94              | -0.31            | -0.50          | -0.60           | Camk1         | NM_133926.1 | Mus musculus calcium/calmodulin-dependent protein kinase 1 (Camk1) mRNA.                            |
| scd28557.1 516-S    | 0.98             | 1.09           | 1.32            | 0.96               | 0.83             | 1.17              | -0.03            | -0.37          | -0.17           | Srgap2        | NM_153070.1 | Mus musculus SRY-box containing gene 5 (Sox5) mRNA.                                                 |
| scd28571.9 1-S      | 1.06             | 1.04           | 1.34            | 0.95               | 0.78             | 0.90              | -0.17            | -0.42          | -0.60           | Sumf1         | NM_145937.1 | Mus musculus expressed sequence SUMF1 (SUMF1) mRNA.                                                 |
| scd28573.11 3-S     | 0.93             | 1.13           | 1.28            | 0.78               | 0.88             | 1.03              | -0.25            | -0.44          | -0.28           | Chd3          | NM_175837.1 | Mus musculus expressed sequence AL033314 (AL033314) mRNA.                                           |
| scd28628.20 125-S   | 1.04             | 1.03           | 1.48            | 0.91               | 0.71             | 1.18              | -0.24            | -0.52          | -0.33           | Ctmd4b        | NM_151448.1 | Mus musculus coiled-coil-helix-coiled-coil-helix domain containing 3 (Chchd3) mRNA.                 |
| scd28804.3 1-S      | 0.85             | 1.06           | 1.13            | 0.94               | 0.88             | 1.16              | 0.15             | -0.27          | -0.40           | Wbp1          | NM_016757.1 | Mus musculus WW domain binding protein 1 (Wbp1) mRNA.                                               |
| scd29011.           |                  |                |                 |                    |                  |                   |                  |                |                 |               |             |                                                                                                     |

| Gene Name             | Control 18 Hours | Control 1 Week | Control 4 Weeks | Treatment 18 Hours | Treatment 1 Week | Treatment 4 Weeks | Log2 FC 18 Hours | Log2 FC 1 Week | Log2 FC 4 Weeks | Symbol         | Accession                                                                                             | Definition                                                                                                                |
|-----------------------|------------------|----------------|-----------------|--------------------|------------------|-------------------|------------------|----------------|-----------------|----------------|-------------------------------------------------------------------------------------------------------|---------------------------------------------------------------------------------------------------------------------------|
| scd30440.2 256-S      | 1.09             | 1.02           | 1.15            | 0.98               | 0.87             | 1.02              | -0.16            | -0.22          | -0.17           | Fadd           | NM_010175.2                                                                                           | Mus musculus Fas (TNFRSF6)-associated via death domain (Fadd) mRNA.                                                       |
| scd30448.26 191-S     | 1.00             | 1.06           | 1.38            | 0.90               | 0.85             | 1.12              | -0.15            | -0.31          | -0.30           | Osbpl5         | NM_024289                                                                                             | Mus musculus oysterol binding protein-like 5 (Osbpl5) mRNA.                                                               |
| scd30490.61 1-S       | 0.95             | 1.06           | 1.19            | 0.96               | 0.91             | 1.03              | 0.03             | -0.21          | -0.21           | BC023835       | NM_172116                                                                                             | Mus musculus cDNA sequence BC023835 (BC023835) mRNA.                                                                      |
| scd30506.2 36-S       | 1.16             | 0.87           | 1.16            | 1.05               | 0.89             | 0.98              | -0.16            | -0.35          | -0.24           | Ifitm3         | NM_025378.1                                                                                           | Mus musculus interferon induced transmembrane protein 3 (Ifitm3) mRNA.                                                    |
| scd30533.1730 21-S    | 0.87             | 1.03           | 1.23            | 0.80               | 0.89             | 1.08              | -0.31            | -0.29          | -0.33           | Tubgcp2        | NM_133755.1                                                                                           | Mus musculus tubulin gamma complex associated protein 2 (Tubgcp2) mRNA.                                                   |
| scd30546.3 60S-S      | 1.01             | 1.04           | 1.34            | 0.89               | 0.85             | 1.21              | -0.18            | -0.27          | -0.15           | 80304860I2Rik  | NM_146203                                                                                             | Mus musculus RIKEN cDNA 80304860I2 gene (80304860I2Rik) mRNA.                                                             |
| scd30554.9 73-S       | 0.95             | 1.09           | 1.30            | 0.83               | 0.98             | 0.99              | -0.20            | -0.16          | -0.41           | 1110003P22Rik  | NM_144522                                                                                             | Mus musculus RIKEN cDNA 1110003P22 gene (1110003P22Rik) mRNA.                                                             |
| scd30665.8.1 14-S     | 1.03             | 0.94           | 1.26            | 0.97               | 0.69             | 1.02              | -0.08            | -0.44          | -0.29           | 1110032O16Rik  | XM_133813.4                                                                                           | Mus musculus RIKEN cDNA 1110032O16 gene (1110032O16Rik) mRNA.                                                             |
| scd30675.13.1 1-S     | 0.96             | 1.10           | 1.26            | 0.89               | 0.79             | 1.10              | -0.10            | -0.50          | -0.19           | Coro1a         | NM_009898.2                                                                                           | Mus musculus coronin actin binding protein 1A (Coro1a) mRNA.                                                              |
| scd30690.8 420-S      | 0.84             | 1.04           | 1.33            | 0.72               | 0.97             | 1.22              | -0.24            | -0.10          | -0.13           | Nfatc2ip       | NM_010900.1                                                                                           | Mus musculus nuclear factor of activated T-cells cytoplasmic calcineurin-dependent 2 interacting protein (Nfatc2ip) mRNA. |
| scd30692.1 111-S      | 1.05             | 1.07           | 1.16            | 0.92               | 0.87             | 1.01              | -0.20            | -0.29          | -0.20           | Lat            | NM_010689.2                                                                                           | Mus musculus linker for activation of T cells (Lat) mRNA.                                                                 |
| scd30789.23 1 30-S    | 1.12             | 1.04           | 1.38            | 0.90               | 0.81             | 1.09              | -0.35            | -0.31          | -0.35           | Cspb1          | NM_033370                                                                                             | Mus musculus coatomer protein complex subunit beta 1 (Cspb1) mRNA.                                                        |
| scd30936.6 1-S        | 1.04             | 1.04           | 1.23            | 0.96               | 0.71             | 1.02              | -0.11            | -0.52          | -0.28           | Rnf137         | NM_198012.1                                                                                           | Mus musculus Rnf137                                                                                                       |
| scd30939.9.1 69-S     | 0.98             | 1.08           | 1.46            | 0.83               | 0.91             | 1.23              | -0.26            | -0.24          | -0.24           | Trim21         | NM_009277.2                                                                                           | Mus musculus tripartite motif protein 21 (Trim21) mRNA.                                                                   |
| scd30947.3 219-S      | 1.05             | 1.03           | 1.17            | 0.91               | 0.82             | 1.00              | -0.21            | -0.31          | -0.22           | Rhog           | NM_019566.2                                                                                           | Mus musculus ras homolog gene family member G (Rhog) mRNA.                                                                |
| scd31012.23.455 0-S   | 0.94             | 1.12           | 1.24            | 0.94               | 0.87             | 1.19              | -0.01            | -0.36          | -0.05           | Uvrag1         | NM_178635.2                                                                                           | Mus musculus UV radiation resistance associated gene (Uvrag1) mRNA.                                                       |
| scd31078.5 227-S      | 1.01             | 1.01           | 1.27            | 0.91               | 0.71             | 1.05              | -0.15            | -0.49          | -0.28           | 1210412D01Rik  | NM_133722.1                                                                                           | Mus musculus RIKEN cDNA 1210412D01 gene (1210412D01Rik) mRNA.                                                             |
| scd31130.14 110-S     | 1.20             | 1.07           | 1.10            | 1.01               | 0.81             | 0.88              | -0.26            | -0.38          | -0.32           | Fes            | NM_010194.1                                                                                           | Mus musculus feline sarcoma oncogene (Fes) mRNA.                                                                          |
| scd31132.1 7-S        | 0.98             | 1.02           | 1.21            | 0.88               | 0.83             | 1.08              | -0.17            | -0.29          | -0.17           | Ctst1          | NM_011870.2                                                                                           | Mus musculus celiectin and integrin binding 1 (celimyrin) (Ctst1) mRNA.                                                   |
| scd311447 115-S       | 0.98             | 0.99           | 1.13            | 0.98               | 0.82             | 1.08              | -0.01            | -0.27          | -0.05           | Ap3s2          | NM_009892.2                                                                                           | Mus musculus adaptor-related protein complex 3 sigma 2 subunit (Ap3s2) mRNA.                                              |
| scd31155.10 11-S      | 0.96             | 0.99           | 1.28            | 0.90               | 0.68             | 1.05              | -0.09            | -0.54          | -0.27           | Migs8          | NM_008594                                                                                             | Mus musculus milk fat globule-EGF factor 8 protein (Migs8) mRNA.                                                          |
| scd31237.29 375-S     | 1.13             | 1.10           | 1.27            | 0.94               | 0.84             | 0.97              | -0.27            | -0.36          | -0.40           | Tjp1           | NM_009386.1                                                                                           | Mus musculus tight junction protein 1 (Tjp1) mRNA.                                                                        |
| scd31250.6.4 21-S     | 0.96             | 1.10           | 1.38            | 0.87               | 0.96             | 1.11              | -0.14            | -0.19          | -0.19           | Klf13          | NM_021366                                                                                             | Mus musculus Kruppel-like factor 13 (Klf13) mRNA.                                                                         |
| scd31390.16.1 7-S     | 0.93             | 1.03           | 1.19            | 0.82               | 0.80             | 1.05              | -0.19            | -0.38          | -0.19           | 2410004H02Rik  | NM_145954.1                                                                                           | Mus musculus RIKEN cDNA 2410004H02 gene (2410004H02Rik) mRNA.                                                             |
| scd31411.7 30-S       | 0.92             | 1.13           | 1.20            | 0.86               | 0.91             | 1.04              | -0.10            | -0.33          | -0.20           | Nr1h2          | NM_009473                                                                                             | Mus musculus nuclear receptor subfamily 1 group H member 2 (Nr1h2) mRNA.                                                  |
| scd31439.2 523-S      | 1.13             | 0.87           | 1.23            | 0.94               | 0.81             | 0.95              | -0.43            | -0.26          | -0.37           | Fxyd5          | NM_009581.2                                                                                           | Mus musculus FXYD domain-containing protein 5 (Fxyd5) mRNA.                                                               |
| scd31519.21.1 2-S     | 0.96             | 1.17           | 1.43            | 0.78               | 0.88             | 1.18              | -0.30            | -0.40          | -0.28           | 104342H42Rik   | NM_194342.3                                                                                           | Mus musculus RIKEN cDNA 2610014H22 gene (2610014H22Rik) mRNA.                                                             |
| scd31563.14.1 34-S    | 0.92             | 1.11           | 1.17            | 1.03               | 0.88             | 0.99              | -0.15            | -0.33          | -0.24           | Ry1            | NM_009109                                                                                             | Mus musculus ryanodine receptor 1 skeletal muscle (Ry1) mRNA.                                                             |
| scd31564.8.5 30-S     | 1.00             | 1.16           | 1.30            | 0.94               | 0.94             | 1.03              | -0.09            | -0.31          | -0.34           | 1200009C21Rik  | NM_028659.1                                                                                           | Mus musculus RIKEN cDNA 1200009C21 gene (1200009C21Rik) mRNA.                                                             |
| scd31612.8.1 58-S     | 0.99             | 1.13           | 1.18            | 0.91               | 0.79             | 0.98              | -0.13            | -0.54          | -0.26           | Egln2          | NM_053208.2                                                                                           | Mus musculus EGL nine homolog 2 (C. elegans) (Egln2) mRNA.                                                                |
| scd31635.5.1 15-S     | 0.87             | 1.07           | 1.30            | 0.84               | 0.84             | 1.11              | -0.04            | -0.35          | -0.23           | Palfh1b3       | NM_008776.1                                                                                           | Mus musculus platelet-activating factor acetylhydrolase isoform 1b alpha1 subunit (Palfh1b3) mRNA.                        |
| scd31670.15.1 26-S    | 0.90             | 1.28           | 1.29            | 0.84               | 0.87             | 1.06              | -0.11            | -0.56          | -0.27           | Cipm1          | NM_019649.1                                                                                           | Mus musculus cleft lip and palate associated transmembrane protein 1 (Cipm1) mRNA.                                        |
| scd31677.12 25-S      | 0.99             | 1.03           | 1.22            | 0.97               | 0.83             | 0.99              | -0.04            | -0.30          | -0.30           | Relb           | NM_009546.2                                                                                           | Mus musculus avian reticuloblastosis viral (v-rel) oncogene related B (Relb) mRNA.                                        |
| scd31703.8.4 24-S     | 0.94             | 1.08           | 1.26            | 0.87               | 0.76             | 1.06              | -0.11            | -0.45          | -0.28           | Scpml1         | NM_009156.1                                                                                           | Mus musculus celenoprotein W muscle 1 (Scpml1) mRNA.                                                                      |
| scd31867 15.2675 48-S | 0.96             | 1.08           | 1.34            | 0.91               | 0.81             | 1.07              | -0.08            | -0.40          | -0.32           | Lsp1           | NM_019391.1                                                                                           | Mus musculus lymphocyte specific 1 (Lsp1) mRNA.                                                                           |
| scd31869.6.1 15-S     | 0.89             | 1.13           | 1.20            | 0.86               | 0.81             | 1.07              | -0.05            | -0.48          | -0.17           | Tnni2          | NM_009405.1                                                                                           | Mus musculus troponin I skeletal fast 2 (Tnni2) mRNA.                                                                     |
| scd31884.10.2 33-S    | 1.12             | 0.97           | 1.44            | 0.89               | 0.58             | 1.01              | -0.32            | -0.75          | -0.51           | Tnn4sf7        | NM_053082.1                                                                                           | Mus musculus transmembrane 4 superfamily member 7 (Tnn4sf7) mRNA.                                                         |
| scd31897.15.1 80-S    | 1.02             | 1.08           | 1.15            | 1.05               | 0.93             | 0.90              | 0.04             | -0.20          | -0.35           | Pkp3           | NM_019762.1                                                                                           | Mus musculus plakophilin 3 (Pkp3) mRNA.                                                                                   |
| scd31945.25 207-S     | 1.10             | 1.08           | 1.33            | 0.87               | 0.84             | 1.03              | -0.34            | -0.38          | -0.37           | Pipre          | NM_011212.2                                                                                           | Mus musculus protein tyrosine phosphatase receptor type E (Pipre) mRNA.                                                   |
| scd31997.22 366-S     | 0.96             | 1.15           | 1.28            | 0.87               | 0.81             | 1.05              | -0.14            | -0.49          | -0.29           | Inpp5f         | NM_078413.3                                                                                           | Mus musculus inositol polyphosphate 5-phosphatase F (Inpp5f) mRNA.                                                        |
| scd32013.13 60-S      | 0.98             | 1.22           | 1.14            | 0.96               | 0.82             | 1.09              | -0.05            | -0.59          | -0.28           | Bckk1          | NM_009239.2                                                                                           | Mus musculus branched chain ketosid dehydrogenase kinase (Bckk1) mRNA.                                                    |
| scd32026.9.1 5-S      | 0.99             | 1.03           | 1.29            | 0.97               | 0.92             | 1.09              | -0.02            | -0.17          | -0.25           | Phkg2          | XM_133769.4                                                                                           | Mus musculus phosphotyrosine kinase gamma 2 (testis) (Phkg2) mRNA.                                                        |
| scd32044.6 195-S      | 0.98             | 1.04           | 1.24            | 0.89               | 0.86             | 1.06              | -0.13            | -0.28          | -0.22           | Cdpt           | NM_138754.1                                                                                           | Mus musculus CDP-diacylglycerol-inositol 3-phosphatidyltransferase (phosphatidylinositol synthase) (Cdpt) mRNA.           |
| scd32054.9.1 1-S      | 0.92             | 1.14           | 1.23            | 0.83               | 0.77             | 1.02              | -0.15            | -0.56          | -0.26           | 1110015E22Rik  | NM_024228.1                                                                                           | Mus musculus RIKEN cDNA 1110015E22 gene (1110015E22Rik) mRNA.                                                             |
| scd32070.13 140-S     | 1.07             | 1.04           | 1.28            | 1.02               | 0.81             | 0.89              | -0.08            | -0.35          | -0.51           | Il4ra          | NM_010557.1                                                                                           | Mus musculus interleukin 4 receptor alpha (Il4ra) mRNA.                                                                   |
| scd32196.12 2-S       | 0.99             | 1.04           | 1.48            | 0.83               | 0.88             | 1.14              | -0.25            | -0.24          | -0.38           | Wee1           | NM_009516.2                                                                                           | Mus musculus wee 1 homolog (S. pombe) (Wee1) mRNA.                                                                        |
| scd32278.15 211-S     | 0.96             | 1.17           | 1.20            | 0.86               | 0.80             | 1.05              | -0.18            | -0.54          | -0.19           | Slm1           | NM_009287.2                                                                                           | Mus musculus stromal interaction molecule 1 (Slm1) mRNA.                                                                  |
| scd32353.4 40-S       | 1.07             | 1.04           | 1.42            | 0.85               | 0.79             | 1.13              | -0.34            | -0.39          | -0.34           | Ndn2           | NM_024220.1                                                                                           | Mus musculus necdin (Ndn) mRNA.                                                                                           |
| scd32592.2 658 11-S   | 1.07             | 1.00           | 1.24            | 0.99               | 0.78             | 1.02              | -0.12            | -0.37          | -0.23           | Ndn            | NM_010892.2                                                                                           | Mus musculus necdin (Ndn) mRNA.                                                                                           |
| scd32642.3 586-S      | 0.96             | 1.14           | 1.41            | 0.92               | 0.79             | 1.13              | -0.06            | -0.52          | -0.33           | 1810054O13Rik  | NM_026436.1                                                                                           | Mus musculus RIKEN cDNA 1810054O13 gene (1810054O13Rik) mRNA.                                                             |
| scd32661.6 250-S      | 1.21             | 0.90           | 1.48            | 0.99               | 0.74             | 1.13              | -0.28            | -0.40          | Kdelr1          | NM_133950      | Mus musculus KDEL (Lys-Asp-Glu-Lau) endoplasmic reticulum protein retention receptor 1 (Kdelr1) mRNA. |                                                                                                                           |
| scd32668.4.1 181-S    | 1.05             | 1.04           | 1.61            | 1.25               | 0.36             | 0.59              | 0.23             | -1.53          | -1.45           | Dbp            | NM_016974.1                                                                                           | Mus musculus D site albumin promoter binding protein (Dbp) mRNA.                                                          |
| scd32695.9.13 0-S     | 0.98             | 1.10           | 1.24            | 0.92               | 0.83             | 1.04              | -0.10            | -0.40          | -0.26           | Nosip          | NM_025533.1                                                                                           | Mus musculus nitric oxide synthase interacting protein (Nosip) mRNA.                                                      |
| scd32699.8.1 168-S    | 0.99             | 1.05           | 1.25            | 0.96               | 0.75             | 1.08              | -0.05            | -0.48          | -0.21           | Rras           | NM_009101.1                                                                                           | Mus musculus Harvey rat sarcoma oncogene subgroup H (Rras) mRNA.                                                          |
| scd32740.6.1 76-S     | 1.08             | 1.14           | 1.22            | 0.92               | 0.81             | 0.92              | -0.24            | -0.32          | -0.34           | Prx1b3         | NM_009490.1                                                                                           | Mus musculus protein activin 13 (neuropilin) (Prx1b3) mRNA.                                                               |
| scd32762.6 595-S      | 1.06             | 0.97           | 1.30            | 0.99               | 0.80             | 0.95              | -0.10            | -0.27          | -0.46           | 2810426N06Rik  | NM_023363.1                                                                                           | Mus musculus RIKEN cDNA 2810426N06 gene (2810426N06Rik) mRNA.                                                             |
| scd32817.6.1 8-S      | 1.07             | 0.95           | 1.36            | 0.89               | 0.77             | 1.09              | -0.28            | -0.31          | -0.32           | Tyrobp         | NM_011662.2                                                                                           | Mus musculus TYRO protein tyrosine kinase binding protein (Tyrobp) mRNA.                                                  |
| scd32850.30.1 3-S     | 1.01             | 1.04           | 1.27            | 0.91               | 0.92             | 0.89              | -0.16            | -0.16          | -0.52           | Map4k1         | NM_008279.1                                                                                           | Mus musculus mitogen activated protein kinase kinase kinase kinase 1 (Map4k1) mRNA.                                       |
| scd32869.6.1 0-S      | 1.17             | 1.06           | 1.10            | 1.01               | 0.73             | 0.91              | -0.22            | -0.54          | -0.28           | Gmfg           | NM_022024.1                                                                                           | Mus musculus glia maturation factor gamma (Gmfg) mRNA.                                                                    |
| scd32920.6.1 10-S     | 1.01             | 1.12           | 1.19            | 0.94               | 0.76             | 0.96              | -0.10            | -0.56          | -0.29           | Tgfb1          | NM_011577.1                                                                                           | Mus musculus transforming growth factor beta 1 (Tgfb1) mRNA.                                                              |
| scd32963.15.1 15-S    | 0.95             | 1.11           | 1.19            | 0.92               | 0.90             | 1.04              | -0.05            | -0.31          | -0.20           | 1500002C020Rik | NM_028047.1                                                                                           | Mus musculus RIKEN cDNA 1500002C020 gene (1500002C020Rik) mRNA.                                                           |
| scd33159.17487 2-S    | 0.93             | 1.08           | 1.20            | 0.85               | 0.71             | 0.71              | -0.16            | -0.41          | -0.15           | Ubp1           | NM_018781.1                                                                                           | Mus musculus ubiquitin binding protein 1 (Ubp1) mRNA.                                                                     |
| scd33184.1737 9-S     | 1.05             | 1.01           | 1.11            | 0.95               | 0.83             | 0.95              | -0.14            | -0.28          | -0.23           | Cog2           | NM_029746.2                                                                                           | Mus musculus component of oligomeric golgi complex 2 (Cog2) mRNA.                                                         |
| scd33204.17 108-S     | 1.02             | 1.09           | 1.25            | 0.91               | 0.81             | 1.09              | -0.16            | -0.41          | -0.20           | D8Ertd325e     | NM_025804                                                                                             | Mus musculus DNA segment Chr 8 ERATO Dp 325 expressed (D8Ertd325e) mRNA.                                                  |
| scd33316.5 357-S      | 1.01             | 1.01           | 1.16            | 0.92               | 0.76             | 0.98              | -0.15            | -0.40          | -0.25           | Zfp1           | NM_011742.1                                                                                           | Mus musculus zinc finger protein 1 (Zfp1) mRNA.                                                                           |
| scd33521.22 145-S     | 0.99             | 1.13           | 1.30            | 0.93               | 0.84             | 0.97              | -0.10            | -0.43          | -0.42           | Rbl2           | NM_011250                                                                                             | Mus musculus retinoblastoma-like 2 (Rbl2) mRNA.                                                                           |
| scd33549.18.1 0-S     | 1.05             | 1.07           | 1.22            | 0.94               | 0.92             | 0.98              | -0.17            | -0.22          | -0.33           | 1300002A08Rik  | NM_025827.2                                                                                           | Mus musculus RIKEN cDNA 1300002A08 gene (1300002A08Rik) mRNA.                                                             |
| scd33562.10.1 132-S   | 1.04             | 0.98           | 1.02            | 1.03               | 0.76             | 0.93              | -0.02            | -0.36          | -0.13           | Fbw9           | NM_026791.1                                                                                           | Mus musculus Fbw9                                                                                                         |
| scd33620.26.1 275-S   | 1.09             | 1.20           | 1.12            | 0.92               | 0.95             | 0.90              | -0.25            | -0.33          | -0.31           | Inp4b          | XM_134427.3                                                                                           | Mus musculus inositol 4-phosphate 3-phosphatase (Inp4b) mRNA.                                                             |
| scd33658.4 26-S       | 1.11             | 1.06           | 1.19            | 1.03               | 0.89             | 0.89              | -0.10            | -0.31          | -0.42           | Ras2d          | XM_204287.3                                                                                           | Mus musculus Ras2d                                                                                                        |
| scd33692.10 16-S      | 1.01             | 1.00           | 1.37            | 0.88               | 0.71             | 1.16              | -0.20            | -0.48          | -0.23           | Gli25d1        | NM_146211.1                                                                                           | Mus musculus Gli25d1                                                                                                      |
| scd33705.5.1 110-S    | 0.92             | 1.11           | 1.29            | 0.94               | 0.82             | 1.18              | 0.03             | -0.44          | -0.12           | 2010315L10Rik  | NM_025917.1                                                                                           | Mus musculus RIKEN cDNA 2010315L10 gene (2010315L10Rik) mRNA.                                                             |
| scd33714.1 27-S       | 1.08             | 1.07           | 1.04            | 0.99               | 0.91             | 0.85              | -0.12            | -0.25          | -0.29           | Jund1          | NM_010592.3                                                                                           | Mus musculus Jun proto-oncogene related gene d1 (Jund1) mRNA.                                                             |
| scd33731.10 375-S     | 1.04             | 1.19           | 1.12            | 1.00               | 0.89             | 1.00              | -0.06            | -0.43          | -0.15           | Homer3         | NM_011984.1                                                                                           | Mus musculus homer homolog 3 (Drosophila) (Homer3) mRNA.                                                                  |
| scd33768.9.1 57-S     | 0.97             | 1.09           | 1.50            | 0.83               | 0.84             | 1.19              | -0.21            | -0.37          | -0.34           | 2900024D24Rik  | NM_175188.3                                                                                           | Mus musculus RIKEN cDNA 2900024D24 gene (2900024D24Rik) mRNA.                                                             |
| scd33995.15 314-S     | 0.99             | 1.02           | 1.14            | 0.96               | 0.77             | 1.02              | -0.01            | -0.40          | -0.10           | Slc20a2        | NM_018944.1                                                                                           | Mus musculus solute carrier family 20 member 2 (Slc20a2) mRNA.                                                            |
| scd34044.10 124-S     | 0.97             | 1.12           | 1.25            | 0.89               | 0.75             | 1.07              | -0.13            | -0.23          | -0.23           | Slc25a4        | NM_025755.1                                                                                           | Mus musculus F (Fbw25) mRNA.                                                                                              |
| scd34134.3 585-S      | 1.00             | 0.99           | 1.12            | 0.99               | 0.77             | 0.97              | -0.01            | -0.35          | -0.20           | Zfp358         | NM_080461.1                                                                                           | Mus musculus zinc finger protein 358 (Zfp358) mRNA.                                                                       |
| scd34198.20.882 255-S | 0.97             | 1.10           | 1.              |                    |                  |                   |                  |                |                 |                |                                                                                                       |                                                                                                                           |

| Gene Name            | Control 18 Hours | Control 1 Week | Control 4 Weeks | Treatment 18 Hours | Treatment 1 Week | Treatment 4 Weeks | Log2 FC 18 Hours | Log2 FC 1 Week | Log2 FC 4 Weeks | Symbol        | Accession     | Definition                                                                                                                                             |
|----------------------|------------------|----------------|-----------------|--------------------|------------------|-------------------|------------------|----------------|-----------------|---------------|---------------|--------------------------------------------------------------------------------------------------------------------------------------------------------|
| scd35976.44_48-S     | 1.03             | 0.98           | 1.50            | 0.96               | 0.90             | 1.08              | -0.10            | -0.14          | -0.49           | Arhgef12      | NM_027144.1   | Mus musculus Rho guanine nucleotide exchange factor (GEF) 12 (Arhgef12) mRNA.                                                                          |
| scd36044.11.1_77-S   | 0.93             | 1.11           | 1.47            | 0.93               | 0.86             | 1.18              | -0.01            | -0.36          | -0.33           | Ddx25         | NM_013932.2   | Mus musculus DEAD (Asp-Glu-Ala-Asp) box polypeptide 25 (Ddx25) mRNA.                                                                                   |
| scd36156.3_7-S       | 0.94             | 1.17           | 1.15            | 0.92               | 0.99             | 0.95              | -0.03            | -0.24          | -0.28           | Edg5          | NM_010333     | Mus musculus endothelial differentiation sphingolipid G-protein-coupled receptor 5 (Edg5) mRNA.                                                        |
| scd36258.13_548-S    | 1.19             | 1.11           | 1.40            | 1.12               | 0.81             | 0.90              | -0.10            | -0.43          | -0.64           | Birc3         | NM_007464.1   | Mus musculus baculoviral IAP repeat-containing 3 (Birc3) mRNA.                                                                                         |
| scd36386.8_686-S     | 1.07             | 1.08           | 0.98            | 1.13               | 0.84             | 0.97              | 0.08             | -0.32          | -0.23           | Cdcp1         | NM_133710.1   | Mus musculus CTD (carboxy-terminal domain) RNA polymerase II polypeptide A) small phosphatase-like (Cdcp1) mRNA.                                       |
| scd36382.30_255-S    | 1.17             | 0.96           | 1.22            | 0.95               | 0.72             | 0.99              | -0.33            | -0.40          | -0.28           | Ilgp3         | NM_133721.1   | Mus musculus integrin alpha 9 (Ilgp3) mRNA.                                                                                                            |
| scd36431.25.1_92-S   | 1.10             | 1.08           | 1.28            | 0.96               | 0.85             | 1.01              | -0.18            | -0.35          | -0.31           | Scap          | XM_135190.4   | Mus musculus Srcb cleavage-activating protein (Scap) mRNA.                                                                                             |
| scd36445.9_185-S     | 0.96             | 1.08           | 1.46            | 0.90               | 0.81             | 1.16              | -0.10            | -0.41          | -0.33           | Scotin        | NM_025858.1   | Mus musculus scotin gene (Scotin) mRNA.                                                                                                                |
| scd36516.9.290_30-S  | 1.02             | 1.12           | 1.14            | 0.95               | 0.85             | 0.95              | -0.10            | -0.39          | -0.26           | Pik9l         | NM_011876.2   | Mus musculus protein tyrosine kinase 9-like (A6-related protein) (Pik9l) mRNA.                                                                         |
| scd36601.18.1_52-S   | 1.00             | 0.98           | 1.25            | 0.83               | 0.76             | 1.07              | -0.27            | -0.35          | -0.22           | Atr           | XM_356175.1   | Mus musculus phospholipid scramblase 2 (Plscr2) mRNA.                                                                                                  |
| scd36624.10.1_0-S    | 1.03             | 1.00           | 1.34            | 0.96               | 0.78             | 1.11              | -0.09            | -0.36          | -0.27           | Plscr2        | NM_008880.2   | Mus musculus phospholipid scramblase 2 (Plscr2) mRNA.                                                                                                  |
| scd36630.14.1_50-S   | 1.00             | 1.10           | 1.41            | 0.90               | 0.80             | 1.19              | -0.27            | -0.45          | -0.34           | Cttnb1        | NM_007801.3   | Mus musculus catenin (plasma membrane) 1 (Cttnb1) mRNA.                                                                                                |
| scd36669.38.1_11-S   | 1.10             | 1.24           | 1.25            | 0.93               | 0.81             | 0.99              | -0.24            | -0.59          | -0.33           | Myo6          | NM_009652.1   | Mus musculus myosin VI (Myo6) mRNA.                                                                                                                    |
| scd366909.24.1_99-S  | 1.01             | 0.95           | 1.19            | 0.89               | 0.82             | 0.99              | -0.20            | -0.36          | -0.25           | Man2c1        | NM_028636.1   | Mus musculus mannosidase alpha class 2C member 1 (Man2c1) mRNA.                                                                                        |
| scd36916.10.1_1-S    | 0.98             | 1.00           | 1.03            | 0.97               | 1.03             | 0.84              | 0.13             | 0.05           | -0.30           | Cspg4         | NM_139001.1   | Mus musculus chondroitin sulfate proteoglycan 4 (Cspg4) mRNA.                                                                                          |
| scd36985.26_298-S    | 1.08             | 1.09           | 1.24            | 0.98               | 0.85             | 0.86              | -0.13            | -0.36          | -0.54           | Usp28         | NM_175482.3   | Mus musculus ubiquitin specific protease 28 (Usp28) mRNA.                                                                                              |
| scd37040.9_46-S      | 1.16             | 1.08           | 1.13            | 1.02               | 0.81             | 0.96              | -0.19            | -0.42          | -0.22           | Dpag1         | NM_008775.2   | Mus musculus dolichyl-phosphate (UDP-N-acetylglucosamine) acetylglucosaminophosphotransferase 1 (GlcNAc-1-P transferase) (Dpag1) mRNA.                 |
| scd37224.9.157_21-S  | 1.02             | 1.00           | 1.24            | 0.95               | 0.82             | 0.97              | -0.11            | -0.28          | -0.35           | Qrit1         | NM_021888.1   | Mus musculus queine inosine-RNA-ribosyltransferase 1 (Qrit1) mRNA.                                                                                     |
| scd37316.8.1_41-S    | 1.20             | 0.95           | 1.19            | 1.06               | 0.85             | 0.87              | -0.18            | -0.55          | -0.46           | Casp4         | NM_007693.1   | Mus musculus caspase 4 apoptosis-related cysteine protease (Casp4) mRNA.                                                                               |
| scd37341.3.1_8-S     | 0.99             | 1.09           | 1.17            | 0.89               | 0.77             | 1.00              | -0.17            | -0.49          | -0.23           | Birc151       | NM_015740.2   | Mus musculus caspase 4 apoptosis-related cysteine protease (Casp4) mRNA.                                                                               |
| scd37359.31.1_62-S   | 1.00             | 1.06           | 1.29            | 0.92               | 0.88             | 1.05              | -0.12            | -0.27          | -0.30           | Mbc2          | NM_011843.1   | Mus musculus membrane bound C2 domain containing protein (Mbc2) mRNA.                                                                                  |
| scd37421.7_120-S     | 0.94             | 1.15           | 1.47            | 0.84               | 0.88             | 1.20              | -0.16            | -0.38          | -0.29           | Rassf3        | NM_138956     | Mus musculus Ras association (RalGDS/AF-6) domain family 3 (Rassf3) mRNA.                                                                              |
| scd37695.8.1_48-S    | 1.13             | 1.05           | 1.14            | 1.04               | 0.87             | 0.85              | -0.13            | -0.27          | -0.42           | Nfic          | NM_008688.2   | Mus musculus nuclear factor I/C (Nfic) mRNA.                                                                                                           |
| scd37744.8.1_11-S    | 0.85             | 1.26           | 1.27            | 0.82               | 0.88             | 1.10              | -0.05            | -0.52          | -0.20           | ORF61         | XM_109575.3   | Mus musculus open reading frame 61 (ORF61) mRNA.                                                                                                       |
| scd37745.17_21-S     | 0.98             | 1.14           | 1.23            | 0.92               | 1.00             | 0.99              | -0.10            | -0.19          | -0.31           | Thrap5        | NM_198107.1   | Mus musculus thyroid hormone receptor associated protein 5 (Thrap5) mRNA.                                                                              |
| scd37757.9_640-S     | 1.07             | 1.01           | 1.15            | 0.98               | 0.78             | 0.96              | -0.13            | -0.38          | -0.27           | LOC0080806Rik | NM_10096908.1 | Mus musculus RIKEN cDNA 120080806 gene (LOC0080806Rik) mRNA.                                                                                           |
| scd37813.1.1_14-S    | 1.04             | 0.89           | 1.29            | 0.92               | 0.82             | 1.12              | -0.18            | -0.27          | -0.21           | Ddr           | NM_010027.1   | Mus musculus D-drachyone tautomerase (Ddr) mRNA.                                                                                                       |
| scd37831.9_401-S     | 1.01             | 1.13           | 1.25            | 0.91               | 0.88             | 0.99              | -0.15            | -0.37          | -0.33           | Tfam          | NM_009360.2   | Mus musculus transcription factor A mitochondrial (Tfam) mRNA.                                                                                         |
| scd37896.8_186-S     | 0.92             | 1.09           | 1.26            | 0.79               | 0.96             | 1.13              | -0.22            | -0.18          | -0.16           | 2510003E04Rik | NM_028197.1   | Mus musculus RIKEN cDNA 2510003E04 gene (2510003E04Rik) mRNA.                                                                                          |
| scd37923.18_59-S     | 0.87             | 1.12           | 1.39            | 0.81               | 0.89             | 1.08              | -0.10            | -0.34          | -0.36           | Sgpl1         | NM_009163.2   | Mus musculus sphingosine phosphatase lyase 1 (Sgpl1) mRNA.                                                                                             |
| scd38024.23.1_253-S  | 0.97             | 1.08           | 1.23            | 0.81               | 0.90             | 1.06              | -0.26            | -0.26          | -0.21           | A530089117Rik | NM_133999.1   | Mus musculus RIKEN cDNA A530089117 gene (A530089117Rik) mRNA.                                                                                          |
| scd38167.5_407-S     | 1.16             | 1.00           | 1.41            | 0.96               | 0.75             | 0.96              | -0.28            | -0.42          | -0.56           | 3110003A17Rik | XM_125510.2   | Mus musculus RIKEN cDNA 3110003A17 gene (3110003A17Rik) mRNA.                                                                                          |
| scd38191.1.1_70-S    | 0.94             | 1.00           | 1.24            | 0.94               | 0.81             | 1.10              | -0.12            | -0.14          | -0.10           | 1810020N02Rik | NM_181070.2   | Mus musculus RIKEN cDNA 2510020N02 gene (2510020N02Rik) mRNA.                                                                                          |
| scd38285.22_33-S     | 1.09             | 1.15           | 1.31            | 0.83               | 0.95             | 1.05              | -0.21            | -0.35          | -0.35           | Map3k7ip2     | NM_008667.1   | Mus musculus mitogen-activated protein kinase kinase kinase 7 interacting protein 2 (Map3k7ip2) mRNA.                                                  |
| scd38287.1.1_16-S    | 0.92             | 1.01           | 1.35            | 0.87               | 0.89             | 1.07              | -0.08            | -0.19          | -0.34           | Stat2         | NM_019953.1   | Mus musculus signal transducer and activator of transcription 2 (Stat2) mRNA.                                                                          |
| scd38287.12.1_41-S   | 0.98             | 1.07           | 1.09            | 0.95               | 0.82             | 0.90              | -0.06            | -0.39          | -0.27           | Tmem4         | NM_019953.1   | Mus musculus transmembrane protein 4 (Tmem4) mRNA.                                                                                                     |
| scd38333.8_34-S      | 0.92             | 1.12           | 1.24            | 0.98               | 0.77             | 1.05              | 0.08             | -0.52          | -0.23           | Galg1         | NM_008080.3   | Mus musculus UDP-N-acetyl-alpha-D-galactosamine/N-acetylneuraminy- galactosylglucosylceramide-beta-1 4-N-acetylgalactosaminyltransferase (Galg1) mRNA. |
| scd38416.13.1_1-S    | 1.07             | 0.83           | 1.39            | 1.00               | 0.66             | 0.83              | -0.09            | -0.33          | -0.76           | Ctdsp2        | NM_146012.1   | Mus musculus CTD (carboxy-terminal domain) RNA polymerase I polypeptide A) small phosphatase 2 (Ctdsp2) mRNA.                                          |
| scd38416.13.1_1-S    | 1.08             | 1.10           | 1.29            | 0.91               | 0.70             | 1.05              | -0.25            | -0.62          | -0.30           | Pibrp         | NM_029928.1   | Mus musculus protein tyrosine phosphatase receptor type B (Pibrp) mRNA.                                                                                |
| scd38417.2.1_21-S    | 0.98             | 1.03           | 1.29            | 0.90               | 0.83             | 1.03              | -0.13            | -0.32          | -0.31           | Hist          | NM_009401.3   | Mus musculus histone H1a lysine (Hist) mRNA.                                                                                                           |
| scd38607.15_414-S    | 1.06             | 1.00           | 1.23            | 0.92               | 0.87             | 1.00              | -0.21            | -0.21          | -0.23           | 2310058A11Rik | NM_133958.1   | Mus musculus RIKEN cDNA 2310058A11 gene (2310058A11Rik) mRNA.                                                                                          |
| scd38615.9_364-S     | 1.09             | 0.89           | 1.59            | 1.00               | 0.84             | 1.00              | -0.13            | -0.09          | -0.69           | E430026E19Rik | NM_146008.1   | Mus musculus RIKEN cDNA E430026E19 gene (E430026E19Rik) mRNA.                                                                                          |
| scd38628.18.8_108-S  | 1.18             | 0.96           | 1.41            | 0.91               | 0.76             | 1.14              | -0.38            | -0.33          | -0.31           | Txnrd1        | NM_015762.1   | Mus musculus thiorodone reductase 1 (Txnrd1) mRNA.                                                                                                     |
| scd38652.3.1_54-S    | 0.99             | 1.13           | 1.18            | 0.92               | 0.92             | 0.97              | -0.10            | -0.30          | -0.30           | Tbxa2r        | NM_009325.1   | Mus musculus thromboxane A2 receptor (Tbxa2r) mRNA.                                                                                                    |
| scd38668.4.1_30-S    | 1.18             | 1.06           | 1.12            | 1.05               | 0.81             | 0.83              | -0.16            | -0.38          | -0.44           | Gadd45b       | NM_008655.1   | Mus musculus growth arrest and DNA-damage-inducible 45 beta (Gadd45b) mRNA.                                                                            |
| scd38677.11_311-S    | 0.88             | 1.09           | 1.33            | 0.80               | 0.84             | 1.22              | -0.12            | -0.37          | -0.12           | Cenkg2        | NM_134002.1   | Mus musculus casein kinase 1 gamma 2 (Cenkg2) mRNA.                                                                                                    |
| scd38697.9.1510_67-S | 1.13             | 0.98           | 1.25            | 0.95               | 0.80             | 1.02              | -0.26            | -0.28          | -0.29           | Midin         | NM_021555.1   | Mus musculus midolin (Midn) mRNA.                                                                                                                      |
| scd38822.17.1_24-S   | 1.04             | 1.09           | 1.50            | 0.90               | 0.80             | 1.04              | -0.19            | -0.38          | -0.12           | Smptd3a       | NM_020561.1   | Mus musculus sphingomyelin phosphodiesterase acid-like 3A (Smptd3a) mRNA.                                                                              |
| scd38908.5.1_88-S    | 0.91             | 1.08           | 1.41            | 0.87               | 0.79             | 1.21              | -0.08            | -0.45          | -0.22           | Smptd3a       | NM_020561.1   | Mus musculus sphingomyelin phosphodiesterase acid-like 3A (Smptd3a) mRNA.                                                                              |
| scd39009.12.1_29-S   | 1.02             | 0.95           | 1.42            | 0.97               | 0.85             | 1.00              | -0.08            | -0.14          | -0.51           | AI429613      | NM_134000.2   | Mus musculus expressed sequence AI429613 (AI429613) mRNA.                                                                                              |
| scd39038.6.1_21-S    | 1.00             | 0.96           | 1.24            | 1.02               | 0.80             | 1.02              | 0.03             | -0.25          | -0.28           | 2310057G13Rik | XM_125542.2   | Mus musculus RIKEN cDNA 2310057G13Rik gene (2310057G13Rik) mRNA.                                                                                       |
| scd39081.11_80-S     | 0.95             | 1.04           | 1.45            | 0.89               | 0.83             | 1.26              | -0.10            | -0.33          | -0.20           | Six7          | NM_016797.2   | Mus musculus syntaxin 7 (Six7) mRNA.                                                                                                                   |
| scd39113.8_92-S      | 0.96             | 1.10           | 1.45            | 0.82               | 0.78             | 1.19              | -0.23            | -0.48          | -0.29           | Ilng1         | NM_010511.1   | Mus musculus syntaxin 7 (Six7) mRNA.                                                                                                                   |
| scd39161.6.1_317-S   | 1.11             | 1.12           | 1.25            | 0.99               | 0.79             | 0.97              | -0.16            | -0.51          | -0.36           | D730019B10Rik | NM_172785.1   | Mus musculus cDNA sequence BC003940 (BC003940) mRNA.                                                                                                   |
| scd39231.4_382-S     | 1.03             | 1.06           | 1.25            | 0.98               | 0.79             | 1.02              | -0.10            | -0.42          | -0.10           | BC003940      | XM_203535.3   | Mus musculus RIKEN cDNA 1810049H13 gene (1810049H13Rik) mRNA.                                                                                          |
| scd39238.2.1_49-S    | 0.89             | 1.15           | 1.14            | 0.92               | 0.83             | 1.06              | 0.05             | -0.47          | -0.10           | 1810049H13Rik | NM_025560.1   | Mus musculus RIKEN cDNA 1810049H13 gene (1810049H13Rik) mRNA.                                                                                          |
| scd39250.15_28-S     | 1.07             | 1.14           | 1.23            | 0.97               | 0.86             | 0.96              | -0.13            | -0.73          | -0.35           | Aak1          | NM_007377.1   | Mus musculus apoptosis-associated tyrosine kinase (Aak1) mRNA.                                                                                         |
| scd39283.5.1_319-S   | 1.29             | 1.08           | 1.15            | 1.07               | 0.81             | 0.91              | -0.29            | -0.41          | -0.35           | 1300017K07Rik | NM_027919.1   | Mus musculus RIKEN cDNA 1300017K07 gene (1300017K07Rik) mRNA.                                                                                          |
| scd39299.4_652-S     | 1.13             | 1.02           | 1.37            | 1.02               | 0.60             | 0.99              | -0.14            | -0.75          | -0.47           | Cygb          | NM_030206.1   | Mus musculus cytoglobin (Cygb) mRNA.                                                                                                                   |
| scd39300.19_19-S     | 0.99             | 1.00           | 1.27            | 0.85               | 0.83             | 1.08              | -0.21            | -0.27          | -0.22           | Rhbd6         | NM_172572.1   | Mus musculus rhodopsin (Rhbd6) mRNA.                                                                                                                   |
| scd39328.7_317-S     | 0.98             | 1.04           | 1.35            | 0.89               | 0.75             | 1.22              | -0.14            | -0.47          | -0.14           | Grb2          | NM_008163.2   | Mus musculus growth factor receptor bound protein 2 (Grb2) mRNA.                                                                                       |
| scd39350.4.1_193-S   | 0.97             | 1.18           | 1.49            | 0.87               | 0.78             | 1.02              | -0.33            | -0.46          | -0.31           | Grb2          | XM_135636.1   | Mus musculus membrane guanine nucleotide exchange factor family member 7 (lgst7) mRNA.                                                                 |
| scd39449.8.1_88-S    | 0.97             | 1.13           | 1.57            | 0.90               | 0.87             | 1.29              | -0.12            | -0.37          | -0.28           | Cd79b         | NM_008339.1   | Mus musculus CD79b antigen (Cd79b) mRNA.                                                                                                               |
| scd39457.6_163-S     | 1.04             | 1.09           | 1.17            | 0.93               | 0.89             | 1.03              | -0.17            | -0.28          | -0.18           | 0610025L06Rik | NM_172397.1   | Mus musculus RIKEN cDNA 0610025L06 gene (0610025L06Rik) mRNA.                                                                                          |
| scd39478.12_629-S    | 0.95             | 1.08           | 1.32            | 0.92               | 0.82             | 1.19              | -0.05            | -0.39          | -0.15           | Plekhn1       | NM_183034.1   | Mus musculus pleckstrin homology domain containing family M (with RUN domain) member 1 (Plekhn1) mRNA.                                                 |
| scd39481.1_185-S     | 0.94             | 1.13           | 1.30            | 0.92               | 0.91             | 1.15              | -0.02            | -0.29          | -0.17           | 2310069I04Rik | NM_133715.1   | Mus musculus RIKEN cDNA 2310069I04 gene (2310069I04Rik) mRNA.                                                                                          |
| scd39554.8_358-S     | 0.91             | 1.10           | 1.25            | 0.82               | 0.84             | 1.13              | -0.16            | -0.38          | -0.15           | Rab5c         | NM_024456     | Mus musculus RAB5C member RAS oncogene family (Rab5c) mRNA.                                                                                            |
| scd39616.9.169_52-S  | 1.07             | 0.97           | 1.20            | 1.15               | 0.70             | 0.89              | 0.11             | -0.47          | -0.43           | Nr1d1         | NM_145434.1   | Mus musculus nuclear receptor subfamily 1, group D member 1 (Nr1d1) mRNA.                                                                              |
| scd39642.11_373-S    | 1.01             | 1.06           | 1.25            | 0.86               | 0.80             | 1.07              | -0.23            | -0.41          | -0.22           | Pp2cb         | NM_054051.1   | Mus musculus phosphatidylinositol-4-phosphate 5-kinase type II beta (Pp2cb) mRNA.                                                                      |
| scd39662.12.1_73-S   | 1.11             | 1.01           | 1.11            | 1.01               | 0.68             | 0.96              | -0.13            | -0.56          | -0.21           | Cdk5rap3      | NM_030248.1   | Mus musculus CDK5 regulatory subunit associated protein 3 (Cdk5rap3) mRNA.                                                                             |
| scd39775.19.1_132-S  | 1.07             | 0.95           | 1.33            | 0.95               | 0.84             | 1.02              | -0.17            | -0.17          | -0.39           | Dhxo4         | NM_026191.1   | Mus musculus DEAH (Asp-Glu-Ala-His) box polypeptide 40 (Dhxo4) mRNA.                                                                                   |
| scd39911.9_64-S      | 0.97             | 1.10           | 1.39            | 0.90               | 0.88             | 1.20              | -0.11            | -0.31          | -0.21           | Gost1         | NM_016810.2   | Mus musculus golgi SNAP receptor complex member 1 (Gost1) mRNA.                                                                                        |
| scd40126.18_106-S    | 1.00             | 1.02           | 1.22            | 0.96               | 0.78             | 1.00              | -0.08            | -0.40          | -0.30           | Epn2          | NM_010148.1   | Mus musculus epin 2 (Epn2) mRNA.                                                                                                                       |
| scd40130.3_30-S      | 1.15             | 0.96           | 1.15            | 0.92               | 1.01             | 0.89              | -0.31            | 0.06           | -0.38           | Mapk7         | NM_011841.1   | Mus musculus mitogen-activated protein kinase 7 (Mapk7) mRNA.                                                                                          |
| scd40144.28.1_2-S    | 0.96             | 1.05           | 1.20            | 0.86               | 0.90             | 1.01              | -0.16            | -0.21          | -0.25           | Filhi         | NM_022009.1   | Mus musculus filthless 1 homolog (Drosophila) (Filhi) mRNA.                                                                                            |
| scd40203.12_25-S     | 1.42             | 0.87           | 1.02            | 1.25               | 0.85             | 0.76              | -0.16            | -0.19          | -0.46           | Spacc         | NM_009242     | Mus musculus secreted acidic cyclin rich glycoprotein (Spacc) mRNA.                                                                                    |
| scd40209.26.1_40-S   | 1.10             | 1.14           | 1.29            | 0.99               | 0.79             | 0.99              | -0.14            | -0.39          | -0.38           | Anxa6         | NM_013472.2   | Mus musculus annexin A6 (Anxa6) mRNA.                                                                                                                  |
| scd40213.8_306-S     | 1.16             | 1.17           | 1.59            | 0.98               | 0.81             | 1.01              |                  |                |                 |               |               |                                                                                                                                                        |

| Gene Name             | Control<br>18 Hours | Control<br>1 Week | Control<br>4 Weeks | Treatment<br>18 Hours | Treatment<br>1 Week | Treatment<br>4 Weeks | Log2 FC<br>18 Hours | Log2 FC<br>1 Week | Log2 FC<br>4 Weeks | Symbol                   | Accession   | Definition                                                                                                                |
|-----------------------|---------------------|-------------------|--------------------|-----------------------|---------------------|----------------------|---------------------|-------------------|--------------------|--------------------------|-------------|---------------------------------------------------------------------------------------------------------------------------|
| scd14376.4_29-S       | 1.15                | 1.14              | 1.25               | 0.98                  | 0.88                | 0.90                 | -0.24               | -0.37             | -0.47              | Vamp2                    | NM_009497.2 | Mus musculus vesicle-associated membrane protein 2 (Vamp2) mRNA.                                                          |
| scd14448.13.1_85-S    | 0.99                | 1.03              | 1.20               | 0.86                  | 0.95                | 1.07                 | -0.20               | -0.11             | -0.17              | Trpv2                    | NM_011706.1 | Mus musculus transient receptor potential cation channel subfamily V member 2 (Trpv2) mRNA.                               |
| scd14463.6_233-S      | 0.96                | 1.24              | 1.21               | 0.96                  | 0.83                | 1.03                 | -0.01               | -0.58             | -0.43              | Grap                     | NM_027817.1 | Mus musculus GPR2-related adaptor protein (Grap) mRNA.                                                                    |
| scd14635.8.225_0-S    | 1.00                | 1.14              | 1.49               | 0.93                  | 0.87                | 1.08                 | -0.10               | -0.39             | -0.27              | Grib2-rs1                | NM_008143.2 | Mus musculus guanine nucleotide binding protein (Grip) mRNA.                                                              |
| scd14711.15_185-S     | 1.18                | 1.03              | 1.50               | 0.96                  | 0.80                | 0.93                 | -0.37               | -0.35             | -0.33              | Rgs1                     | NM_134015.1 | Mus musculus guanine nucleotide binding protein 2 related sequence 1 (Grib2-rs1) mRNA.                                    |
| scd14727.3.1_77-S     | 1.25                | 0.85              | 1.15               | 1.20                  | 0.69                | 0.90                 | -0.05               | -0.29             | -0.37              | Hsp1                     | NM_175001.1 | Mus musculus neuron specific gene family member 2 (Nag2) mRNA.                                                            |
| scd14730.11_1-S       | 1.00                | 1.03              | 1.19               | 0.90                  | 0.86                | 0.99                 | -0.15               | -0.24             | -0.26              | Nag2                     | NM_008741.1 | Mus musculus neuron specific gene family member 2 (Nag2) mRNA.                                                            |
| scd14869.17_189-S     | 1.02                | 0.99              | 1.17               | 0.90                  | 0.72                | 1.00                 | -0.20               | -0.46             | -0.22              | Dnli                     | NM_013810.1 | Mus musculus drebrin-like (Dnli) mRNA.                                                                                    |
| scd14882.13.532-S     | 1.06                | 0.98              | 1.12               | 1.04                  | 0.73                | 0.88                 | -0.03               | -0.42             | -0.35              | Nipenap1                 | NM_008698.1 | Mus musculus 4-nitrophenylphosphatase domain and non-neuronal SNAP25-like protein homolog 1 (C. elegans) (Nipenap1) mRNA. |
| scd14904.3_0-S        | 1.05                | 1.06              | 1.10               | 0.98                  | 0.87                | 0.99                 | -0.09               | -0.28             | -0.15              | Sepm                     | NM_053267.1 | Mus musculus selenoprotein M (Sepm) mRNA.                                                                                 |
| scd142012.1.1_30-S    | 0.94                | 1.08              | 1.17               | 0.98                  | 0.79                | 1.09                 | 0.05                | -0.44             | -0.11              | Nudt14                   | NM_025399.1 | Mus musculus nudix (nucleoside diphosphate linked moiety X)-type motif 14 (Nudt14) mRNA.                                  |
| scd14211.15.1_121-S   | 0.91                | 1.15              | 1.01               | 0.91                  | 0.80                | 0.94                 | -0.37               | -0.60             | -0.60              | Scs3                     | NM_023049.1 | Mus musculus scs3 box-containing protein 3 (Scs3) mRNA.                                                                   |
| scd14245.20_31-S      | 1.02                | 1.10              | 1.31               | 0.96                  | 0.96                | 1.02                 | -0.08               | -0.19             | -0.37              | Rps6ka5                  | NM_153587.1 | Mus musculus ribosomal protein S6 kinase polypeptide 5 (Rps6ka5) mRNA.                                                    |
| scd142239.4_289-S     | 1.04                | 1.08              | 1.35               | 0.87                  | 0.75                | 1.09                 | -0.26               | -0.51             | -0.33              | Npc2                     | NM_023409.3 | Mus musculus Niemann Pick type C2 (Npc2) mRNA.                                                                            |
| scd142333.3_174-S     | 0.88                | 1.13              | 1.39               | 0.72                  | 0.90                | 1.18                 | -0.29               | -0.31             | -0.25              | Sgpp1                    | NM_030750.2 | Mus musculus sphingosine-1-phosphate phosphatase 1 (Sgpp1) mRNA.                                                          |
| scd142385.21_636-S    | 0.94                | 1.15              | 1.25               | 0.81                  | 0.96                | 0.93                 | -0.22               | -0.27             | -0.41              | Sos2                     | XM_127051.3 | Mus musculus Son of sevenless homolog 2 (Drosophila) (Sos2) mRNA.                                                         |
| scd142451.6.1_16-S    | 1.03                | 1.11              | 1.33               | 0.85                  | 0.73                | 1.07                 | -0.28               | -0.57             | -0.32              | Nfkbia                   | NM_010907   | Mus musculus nuclear factor of kappa light chain gene enhancer in B-cells inhibitor alpha (Nfkbia) mRNA.                  |
| scd142483.11.1_9-S    | 1.05                | 1.05              | 1.39               | 0.95                  | 0.84                | 0.98                 | -0.13               | -0.33             | -0.53              | RIKEN cDNA 4930511A21Rik | NM_021529.2 | Mus musculus RIKEN cDNA 4930511A21 gene (4930511A21Rik) mRNA.                                                             |
| scd142483.13_0-S      | 0.96                | 1.04              | 1.16               | 0.87                  | 0.84                | 1.03                 | -0.13               | -0.30             | -0.17              | C122                     | NM_007498.1 | Mus musculus c122 2 muscle (C122) mRNA.                                                                                   |
| scd142483.1.1_1-S     | 0.89                | 1.03              | 1.33               | 0.75                  | 0.86                | 1.17                 | -0.26               | -0.28             | -0.18              | 1810011016Rik            | NM_025456.2 | Mus musculus RIKEN cDNA 1810011016 gene (1810011016Rik) mRNA.                                                             |
| scd142517.2_446-S     | 0.96                | 1.09              | 1.31               | 0.90                  | 0.86                | 1.12                 | -0.11               | -0.34             | -0.23              | Lrm3                     | NM_010733.2 | Mus musculus leucine rich repeat protein 3 neuronal (Lrm3) mRNA.                                                          |
| scd142532.6_0-S       | 1.21                | 0.95              | 1.49               | 1.00                  | 0.71                | 1.06                 | -0.28               | -0.41             | -0.54              | Tm4sf13                  | NM_025359.2 | Mus musculus transmembrane 4 superfamily member 13 (Tm4sf13) mRNA.                                                        |
| scd142591.3.1_5-S     | 1.17                | 0.93              | 1.30               | 0.95                  | 0.68                | 1.03                 | -0.32               | -0.42             | -0.34              | Idc2                     | NM_010496.2 | Mus musculus inhibitor of DNA binding 2 (Idc2) mRNA.                                                                      |
| scd142730.18.154_13-S | 1.06                | 1.13              | 1.22               | 0.96                  | 0.81                | 1.04                 | -0.15               | -0.46             | -0.23              | 2610204M08Rik            | NM_198411.1 | Mus musculus RIKEN cDNA 2610204M08 gene (2610204M08Rik) mRNA.                                                             |
| scd142795.16.1_26-S   | 1.17                | 0.96              | 1.23               | 0.89                  | 0.66                | 0.93                 | -0.40               | -0.53             | -0.41              | Evi                      | NM_007965.2 | Mus musculus Evi-1 protein (Evi) mRNA.                                                                                    |
| scd142858.13_56-S     | 0.95                | 1.08              | 1.32               | 0.79                  | 0.87                | 1.09                 | -0.27               | -0.31             | -0.27              | Rim3                     | NM_177620.2 | Mus musculus Ras and Rab interactor 3 (Rim3) mRNA.                                                                        |
| scd143172.15_129-S    | 0.94                | 1.09              | 1.25               | 0.89                  | 0.88                | 1.17                 | -0.08               | -0.28             | -0.21              | Prp39                    | NM_077604.2 | Mus musculus PRP39 pre-mRNA processing factor 39 homolog (yeast) (Prp39) mRNA.                                            |
| scd143224.11.1_2-S    | 0.96                | 1.13              | 1.83               | 0.92                  | 0.81                | 1.10                 | -0.07               | -0.48             | -0.78              | Coch                     | NM_007728.2 | Mus musculus coagulation factor C homolog (Limulus polyphemus) (Coch) mRNA.                                               |
| scd143245.1.1_35-S    | 0.88                | 1.06              | 1.20               | 0.80                  | 0.81                | 1.08                 | -0.13               | -0.39             | -0.15              | Immp2                    | NM_053122.2 | Mus musculus inner mitochondrial membrane peptidase 2-like (S. cerevisiae) (Immp2) mRNA.                                  |
| scd143293.5.1_3-S     | 1.03                | 1.02              | 1.25               | 0.85                  | 0.87                | 1.06                 | -0.28               | -0.23             | -0.25              | Twistnb                  | NM_172553.1 | Mus musculus TWIST neighbor (Twistnb) mRNA.                                                                               |
| scd143318.5_59-S      | 1.01                | 0.99              | 1.39               | 0.91                  | 0.98                | 0.97                 | -0.15               | 0.00              | -0.52              | Tmem18                   | NM_172049.1 | Mus musculus Tmem18                                                                                                       |
| scd143555.12_79-S     | 0.97                | 1.12              | 1.32               | 0.86                  | 0.86                | 1.17                 | -0.19               | -0.37             | -0.18              | AI450757                 | NM_172592.1 | Mus musculus baculoviral IAP repeat-containing 1b (Birc1b) mRNA.                                                          |
| scd143601.16.1_97-S   | 1.06                | 1.05              | 1.19               | 0.96                  | 0.75                | 0.92                 | -0.40               | -0.49             | -0.36              | Birc1b                   | NM_009572.1 | Mus musculus baculoviral IAP repeat-containing 1b (Birc1b) mRNA.                                                          |
| scd143649.4.1_9-S     | 0.96                | 1.03              | 1.62               | 0.85                  | 0.63                | 0.96                 | -0.17               | -0.31             | -0.26              | Heb1                     | NM_010422.1 | Mus musculus heveoside hydrolase B (Heb1) mRNA.                                                                           |
| scd143706.9.1_17-S    | 0.95                | 1.07              | 1.22               | 0.87                  | 0.85                | 1.10                 | -0.12               | -0.33             | -0.14              | Aqg10l                   | NM_025770.2 | Mus musculus autophagy 10-like (S. cerevisiae) (Aqg10l) mRNA.                                                             |
| scd143927.8_10-S      | 0.89                | 1.14              | 1.23               | 0.85                  | 0.89                | 1.07                 | -0.05               | -0.35             | -0.20              | Lman2                    | NM_025828.2 | Mus musculus lectin mannose-binding 2 (Lman2) mRNA.                                                                       |
| scd143999.22_97-S     | 0.92                | 1.10              | 1.25               | 0.80                  | 0.88                | 1.11                 | -0.20               | -0.31             | -0.16              | Phf2                     | NM_011078.2 | Mus musculus PHD finger protein 2 (Phf2) mRNA.                                                                            |
| scd144027.5.1_15-S    | 0.91                | 1.08              | 1.20               | 0.96                  | 0.80                | 1.16                 | 0.09                | -0.42             | -0.05              | 5930418K15Rik            | XM_355635.1 | Mus musculus 5930418K15Rik                                                                                                |
| scd144183.10.1_0-S    | 1.07                | 1.06              | 1.11               | 1.05                  | 0.85                | 0.96                 | -0.03               | -0.32             | -0.21              | Aldh5a1                  | NM_172532.1 | Mus musculus aldehyde dehydrogenase family 5 member 1 (Aldh5a1) mRNA.                                                     |
| scd144185.3.1_24-S    | 0.90                | 1.07              | 1.40               | 0.78                  | 0.94                | 1.23                 | -0.21               | -0.19             | -0.23              | Them2                    | NM_025790.1 | Mus musculus thioesterase superfamily member 2 (Them2) mRNA.                                                              |
| scd144502.5_1-S       | 1.13                | 1.04              | 1.31               | 0.94                  | 0.75                | 0.87                 | -0.11               | -0.32             | -0.60              | Zbed1                    | NM_028106.1 | Mus musculus Zbed1                                                                                                        |
| scd144605.22_625-S    | 0.96                | 1.18              | 1.14               | 0.87                  | 0.80                | 0.96                 | -0.13               | -0.56             | -0.26              | 2810465F10Rik            | NM_127419.3 | Mus musculus RIKEN cDNA 2810465F10 gene (2810465F10Rik) mRNA.                                                             |
| scd144709.8_227-S     | 1.08                | 1.07              | 1.23               | 0.90                  | 0.86                | 1.04                 | -0.27               | -0.31             | -0.24              | Smad5                    | NM_008541.2 | Mus musculus RIKEN cDNA B230219D22Rik                                                                                     |
| scd144723.2_201-S     | 0.97                | 1.05              | 1.34               | 0.79                  | 0.90                | 1.15                 | -0.30               | -0.22             | -0.21              | B230219D22Rik            | NM_181278.2 | Mus musculus RIKEN cDNA B230219D22Rik                                                                                     |
| scd144884.17.178_34-S | 0.96                | 1.14              | 1.28               | 0.88                  | 0.96                | 1.02                 | -0.12               | -0.25             | -0.29              | Rick1                    | NM_024242.2 | Mus musculus RIO kinase 1 (yeast) (Rick1) mRNA.                                                                           |
| scd144920.3.1_42-S    | 1.13                | 0.98              | 1.38               | 1.02                  | 0.84                | 0.93                 | -0.15               | -0.24             | -0.59              | 2310047M15Rik            | NM_127278.1 | Mus musculus RIKEN cDNA 2310047M15 gene (2310047M15Rik) mRNA.                                                             |
| scd144935.1_355-S     | 0.93                | 1.10              | 1.29               | 0.84                  | 0.81                | 1.06                 | -0.15               | -0.45             | -0.27              | Serpinc6b                | NM_011454.1 | Mus musculus serine (or cysteine) proteinase inhibitor clade B member 6b (Serpinc6b) mRNA.                                |
| scd145062.20_217-S    | 1.13                | 1.13              | 1.49               | 0.91                  | 0.89                | 1.04                 | -0.31               | -0.43             | -0.41              | Scn1b                    | NM_009117.1 | Mus musculus sodium channel protein type 1b (Scn1b) mRNA.                                                                 |
| scd145186.7_52-S      | 1.13                | 0.89              | 1.25               | 0.96                  | 0.77                | 0.94                 | -0.23               | -0.20             | -0.42              | 2610206B13Rik            | NM_026047.3 | Mus musculus RIKEN cDNA 2610206B13 gene (2610206B13Rik) mRNA.                                                             |
| scd145197.6_141-S     | 0.83                | 1.09              | 1.35               | 0.67                  | 0.92                | 1.16                 | -0.33               | -0.25             | -0.22              | Fbx3a                    | NM_015822.1 | Mus musculus F-box and leucine-rich repeat protein 3a (Fbx3a) mRNA.                                                       |
| scd145278.7.1_11-S    | 1.11                | 1.00              | 1.26               | 0.92                  | 0.83                | 0.95                 | -0.27               | -0.26             | -0.44              | Dnaq1                    | NM_025384.3 | Mus musculus DnaJ (Hsp40) homolog subfamily D member 1 (Dnaq1) mRNA.                                                      |
| scd145355.14.1_1-S    | 0.99                | 1.07              | 1.31               | 0.92                  | 0.82                | 1.07                 | -0.11               | -0.38             | -0.29              | Ppp3cc                   | NM_008915.1 | Mus musculus protein phosphatase 3 catalytic subunit gamma isoform (Ppp3cc) mRNA.                                         |
| scd145359.10.52_9-S   | 0.99                | 1.09              | 1.11               | 0.99                  | 0.82                | 0.99                 | 0.01                | -0.41             | -0.16              | Palmd2                   | NM_145978.1 | Mus musculus PDZ and LIM domain 2 (Palmd2) mRNA.                                                                          |
| scd145377.14.1_30-S   | 0.86                | 1.17              | 1.76               | 0.82                  | 0.78                | 1.29                 | -0.11               | -0.58             | -0.45              | Adamdec1                 | NM_021475.1 | Mus musculus ADAM-like decysin 1 (Adamdec1) mRNA.                                                                         |
| scd145401.3.1_10-S    | 0.86                | 1.12              | 1.26               | 0.88                  | 0.75                | 0.91                 | -0.03               | -0.59             | -0.31              | Pik2b                    | NM_173439.1 | Mus musculus PIK2 protein tyrosine kinase 2 beta (Pik2b) mRNA.                                                            |
| scd145410.6_649-S     | 0.91                | 1.06              | 0.91               | 1.13                  | 0.99                | 1.10                 | -0.11               | -0.36             | -0.18              | Scara3                   | NM_172604.1 | Mus musculus scavenger receptor class A member 3 (Scara3) mRNA.                                                           |
| scd145482.13_126-S    | 0.95                | 1.04              | 1.25               | 0.82                  | 0.75                | 1.08                 | -0.22               | -0.47             | -0.20              | 1110008L20Rik            | NM_028643.1 | Mus musculus RIKEN cDNA 1110008L20 gene (1110008L20Rik) mRNA.                                                             |
| scd145507.16.1_103-S  | 0.99                | 1.05              | 1.22               | 0.79                  | 0.99                | 1.03                 | -0.34               | -0.08             | -0.26              | Camp1                    | XM_127861.2 | Mus musculus CAMP1                                                                                                        |
| scd145536.7.1_0-S     | 1.09                | 0.99              | 1.53               | 0.87                  | 0.85                | 1.22                 | -0.33               | -0.21             | -0.34              | Tm9sf1                   | NM_028780.2 | Mus musculus transmembrane 9 superfamily member 1 (Tm9sf1) mRNA.                                                          |
| scd145561.26_336-S    | 0.91                | 1.12              | 1.30               | 0.89                  | 0.96                | 1.04                 | -0.05               | -0.22             | -0.31              | Acin1                    | NM_023190.1 | Mus musculus apoptotic chromatin condensation inducer 1 (Acin1) mRNA.                                                     |
| scd145586.9_57-S      | 1.13                | 0.98              | 1.26               | 0.98                  | 0.85                | 0.98                 | -0.22               | -0.21             | -0.35              | Rac2b                    | NM_176011.1 | Mus musculus Rac2b                                                                                                        |
| scd145611.6.1_108-S   | 0.95                | 1.19              | 1.38               | 0.89                  | 0.88                | 1.23                 | -0.08               | -0.43             | -0.16              | IC393161                 | XM_127717.1 | Mus musculus cDNA sequence BC039161 (BC039161) mRNA.                                                                      |
| scd145612.1.1_2-S     | 0.97                | 1.12              | 1.15               | 0.86                  | 0.93                | 0.97                 | -0.17               | -0.27             | -0.28              | Osgp                     | NM_133676.1 | Mus musculus O-sialoglycoprotein endopeptidase (Osgp) mRNA.                                                               |
| scd145614.46.1_71-S   | 1.16                | 0.95              | 1.32               | 1.02                  | 0.72                | 1.02                 | -0.20               | -0.40             | -0.36              | Top1                     | NM_003551.1 | Mus musculus telomerase associated protein 1 (Top1) mRNA.                                                                 |
| scd145680.4.1_52-S    | 0.89                | 1.12              | 1.27               | 1.06                  | 0.64                | 1.04                 | 0.23                | -0.79             | -0.28              | Bmp4                     | NM_007554.1 | Mus musculus bone morphogenetic protein 4 (Bmp4) mRNA.                                                                    |
| scd145763.11.1_0-S    | 0.94                | 1.10              | 1.18               | 0.97                  | 0.84                | 1.00                 | 0.04                | -0.40             | -0.24              | Phf7                     | NM_027949.1 | Mus musculus PHD finger protein 7 (Phf7) mRNA.                                                                            |
| scd145839.23_390-S    | 0.97                | 1.08              | 1.21               | 0.97                  | 0.84                | 1.03                 | 0.00                | -0.36             | -0.23              | Camk2g                   | NM_178597.2 | Mus musculus calcium/calmodulin-dependent protein kinase II gamma (Camk2g) mRNA.                                          |
| scd145867.12_561-S    | 1.02                | 1.07              | 1.28               | 0.87                  | 0.77                | 1.06                 | -0.23               | -0.46             | -0.27              | Ube2e2                   | NM_144839.1 | Mus musculus RIKEN cDNA 2400006A19 gene (2400006A19Rik) mRNA.                                                             |
| scd145897.9.1_15-S    | 1.12                | 1.05              | 1.38               | 0.89                  | 0.96                | 1.01                 | -0.32               | -0.16             | -0.47              | 2400006A19Rik            | NM_025550.2 | Mus musculus transmembrane 9 superfamily member 2 (Tm9sf2) mRNA.                                                          |
| scd145932.17_232-S    | 1.02                | 1.13              | 1.30               | 0.96                  | 0.78                | 1.01                 | -0.09               | -0.53             | -0.36              | Tm9sf2                   | NM_080556.2 | Mus musculus transmembrane 9 superfamily member 2 (Tm9sf2) mRNA.                                                          |
| scd145946.14_20-S     | 0.97                | 1.04              | 1.31               | 0.86                  | 0.83                | 1.11                 | -0.17               | -0.32             | -0.24              | Mbnl2                    | NM_207515.1 | Mus musculus Muscblind-like 2 (Mbnl2) transcript variant 1 mRNA.                                                          |
| scd146000.3_481-S     | 0.97                | 1.10              | 1.13               | 0.91                  | 0.87                | 0.96                 | -0.09               | -0.34             | -0.23              | Ndfip2                   | NM_029561.1 | Mus musculus Nedd4 family interacting protein 2 (Ndfip2) mRNA.                                                            |
| scd146052.12.1_12-S   | 1.03                | 1.04              | 1.19               | 0.90                  | 0.84                | 0.92                 | -0.20               | -0.30             | -0.38              | Sugt1                    | NM_026474.2 | Mus musculus SGT1 suppressor of G2 allele of SKP1 (S. cerevisiae) (Sugt1) mRNA.                                           |
| scd146068.12.1_1-S    | 0.96                | 1.06              | 1.42               | 0.91                  | 0.73                | 1.06                 | -0.08               | -0.55             | -0.42              | 2310046K10Rik            | NM_029495.1 | Mus musculus 2310046K10Rik                                                                                                |
| scd146254.30.2_18-S   | 1.12                | 1.15              | 1.29               | 0.93                  | 0.83                | 0.85                 | -0.28               | -0.44             | -0.59              | Adpr1l                   | NM_283217.2 | Mus musculus WD repeat domain 23 (Wdr23) mRNA.                                                                            |
| scd146280.17_461-S    | 0.98                | 1.12              | 1.26               | 0.90                  | 0.88                | 1.05                 | -0.10               | -0.33             | -0.27              | Wdr23                    | NM_193734.1 | Mus musculus WD repeat domain 23 (Wdr23) mRNA.                                                                            |
| scd146398.47.1_4-S    | 0.95                | 1.06              | 1.27               | 0.86                  | 0.75                | 1.08                 | -0.21               | -0.47             | -0.22              | Kin1                     | NM_008477.1 | Mus musculus kinase 1 (Kin1) mRNA.                                                                                        |
| scd146515.12.62_5-S   | 1.01                | 1.05              | 1.30               | 0.88                  | 0.88                | 1.08                 | -0.20               | -0.26             | -0.28              | Actr8                    | NM_027493.1 | Mus musculus ARP actin-related protein 8 homolog (S. cerevisiae) (Actr8) mRNA.                                            |
| scd146562.6.1_9-S     | 1.28                | 0.98              |                    |                       |                     |                      |                     |                   |                    |                          |             |                                                                                                                           |

| Gene Name             | Control 18 Hours | Control 1 Week | Control 4 Weeks | Treatment 18 Hours | Treatment 1 Week | Treatment 4 Weeks | Log2 FC 18 Hours | Log2 FC 1 Week | Log2 FC 4 Weeks | Symbol        | Accession   | Definition                                                                                                             |
|-----------------------|------------------|----------------|-----------------|--------------------|------------------|-------------------|------------------|----------------|-----------------|---------------|-------------|------------------------------------------------------------------------------------------------------------------------|
| scd47642.16 55-S      | 1.05             | 1.02           | 1.56            | 0.89               | 0.80             | 1.10              | -0.24            | -0.35          | -0.51           | BC021523      | NM_172611.1 | Mus musculus cDNA sequence BC021523 (BC021523) mRNA.                                                                   |
| scd47703.8 132-S      | 0.91             | 1.13           | 1.49            | 0.99               | 0.63             | 1.11              | 0.12             | -0.85          | -0.42           | Tefl          | NM_017376.2 | Mus musculus thyrotroph embryonic factor (Tef) transcript variant 2 mRNA.                                              |
| scd47755.2 19-S       | 1.18             | 1.09           | 1.04            | 1.20               | 0.67             | 0.72              | 0.04             | -0.67          | -0.53           | H10           | NM_008197.2 | Mus musculus H1 histone family member 0 (H10) mRNA.                                                                    |
| scd47772.10.1 79-S    | 1.12             | 1.12           | 1.08            | 0.98               | 0.86             | 0.91              | -0.19            | -0.37          | -0.25           | N24           | NM_008677.1 | Mus musculus neutrophil cytosolic factor 4 (N24) mRNA.                                                                 |
| scd47834.1 206-S      | 1.07             | 0.97           | 1.28            | 0.98               | 0.82             | 1.03              | -0.12            | -0.23          | -0.33           | Zfp163        | NM_145916.6 | Mus musculus zinc finger protein 7 (Zfp163) mRNA.                                                                      |
| scd47892.24 470-S     | 0.99             | 1.01           | 1.32            | 0.88               | 0.75             | 1.07              | -0.16            | -0.42          | -0.29           | D15Ead621a    | NM_145999.1 | Mus musculus D15Ead621a                                                                                                |
| scd48128.6 4-S        | 0.98             | 1.13           | 1.40            | 0.84               | 0.79             | 1.12              | -0.22            | -0.50          | -0.31           | 2900001O04Rik | NM_028213.2 | Mus musculus RIKEN cDNA 2900001O04 gene (2900001O04Rik) mRNA.                                                          |
| scd48171.9 97-S       | 1.16             | 0.96           | 1.17            | 0.96               | 0.83             | 0.83              | -0.28            | -0.22          | -0.52           | Dscr3         | NM_007834.1 | Mus musculus Down syndrome critical region gene 3 (Dscr3) mRNA.                                                        |
| scd48354.21.1 85-S    | 1.02             | 1.07           | 1.14            | 0.96               | 0.77             | 0.99              | -0.09            | -0.45          | -0.20           | BC043118      | NM_174848.2 | Mus musculus cDNA sequence BC043118 (BC043118) mRNA.                                                                   |
| scd48388.145 188-S    | 1.05             | 1.18           | 1.17            | 0.97               | 0.85             | 0.97              | -0.11            | -0.49          | -0.27           | 2310061J03Rik | NM_148411.1 | Mus musculus RIKEN cDNA 2310061J03 gene (2310061J03Rik) mRNA.                                                          |
| scd49390.12.1 179-S   | 1.03             | 1.09           | 1.07            | 0.95               | 1.02             | 0.88              | -0.10            | -0.09          | -0.30           | Lrrn2         | NM_028815.3 | Mus musculus leucine rich repeat domain family member 2 (Lrrn2) mRNA.                                                  |
| scd49437.31 30-S      | 1.00             | 0.93           | 1.38            | 0.98               | 0.87             | 0.95              | -0.02            | -0.45          | -0.03           | Phb2          | NM_153413.1 | Mus musculus pleckstrin homology like domain family member 2 (Phb2) mRNA.                                              |
| scd49484.12.1 8-S     | 1.06             | 1.05           | 1.13            | 0.95               | 0.74             | 0.95              | -0.17            | -0.49          | -0.25           | Plat1a        | NM_134102   | Mus musculus phospholipase A1 member A (Plat1a) mRNA.                                                                  |
| scd49822.17 669-S     | 1.05             | 1.06           | 1.22            | 0.91               | 0.81             | 0.99              | -0.21            | -0.39          | -0.30           | D230007K08Rik | NM_175547.2 | Mus musculus RIKEN cDNA D230007K08 gene (D230007K08Rik) mRNA.                                                          |
| scd49035.10.1 1-S     | 1.11             | 0.96           | 1.38            | 0.97               | 0.75             | 0.95              | -0.20            | -0.35          | -0.55           | Cbb           | XM_358863.1 | Mus musculus Casitas B-lineage lymphoma B (Cbb) mRNA.                                                                  |
| scd49145.9 59-S       | 1.12             | 0.99           | 1.12            | 1.11               | 0.73             | 0.75              | -0.01            | -0.39          | -0.59           | B4gal4        | NM_019604.1 | Mus musculus UDP-Gal beta-GlcNAc beta 1-4-galactosyltransferase polypeptide 4 (B4gal4) mRNA.                           |
| scd49219.13 574-S     | 0.98             | 1.08           | 1.34            | 0.82               | 0.87             | 1.16              | -0.26            | -0.30          | -0.20           | Osip11        | NM_176840.2 | Mus musculus oxysterol binding protein-like 11 (Osip11) mRNA.                                                          |
| scd49427.31 283-S     | 0.94             | 1.16           | 1.34            | 0.83               | 0.86             | 1.05              | -0.19            | -0.43          | -0.37           | Tnfrsf17      | NM_011608.1 | Mus musculus tumor necrosis factor receptor superfamily member 17 (Tnfrsf17) mRNA.                                     |
| scd49493.1 52-S       | 0.96             | 1.07           | 1.32            | 0.78               | 0.94             | 1.03              | -0.30            | -0.19          | -0.35           | Ubr2          | NM_358754.1 | Mus musculus atrochitin 1 (Ubr2) mRNA.                                                                                 |
| scd49475.21 477-S     | 1.05             | 0.98           | 1.23            | 0.92               | 0.77             | 1.06              | -0.20            | -0.33          | -0.22           | Mgrr1         | NM_029557.2 | Mus musculus malhotrin ring finger 1 (Mgrr1) mRNA.                                                                     |
| scd49476.8.9 25-S     | 0.96             | 1.07           | 1.26            | 0.91               | 0.80             | 1.07              | -0.08            | -0.42          | -0.24           | Hmx2          | NM_010443.1 | Mus musculus heme oxygenase (deacylating) 2 (Hmx2) mRNA.                                                               |
| scd49708.14 0-S       | 0.99             | 1.09           | 1.26            | 0.89               | 0.87             | 1.09              | -0.15            | -0.33          | -0.21           | Fbx17         | NM_128716.2 | Mus musculus Fbx17                                                                                                     |
| scd49747.21 79-S      | 1.02             | 1.18           | 1.30            | 0.89               | 0.83             | 1.01              | -0.21            | -0.48          | -0.36           | 4432409M07Rik | NM_153551.1 | Mus musculus RIKEN cDNA 4432409M07 gene (4432409M07Rik) mRNA.                                                          |
| scd49759.5 3-S        | 1.01             | 1.00           | 1.19            | 0.98               | 0.73             | 0.98              | -0.04            | -0.44          | -0.28           | A1662250      | NM_178926.2 | Mus musculus expressed sequence A1662250 (A1662250) mRNA.                                                              |
| scd49765.36 30-S      | 1.08             | 1.09           | 1.18            | 1.03               | 0.82             | 0.88              | -0.08            | -0.40          | -0.42           | Piprs         | NM_011218.1 | Mus musculus protein tyrosine phosphatase receptor type 5 (Piprs) mRNA.                                                |
| scd49982.18.1 0-S     | 1.01             | 1.04           | 1.14            | 0.95               | 0.85             | 1.04              | -0.09            | -0.28          | -0.10           | 1200014P03Rik | NM_026891.1 | Mus musculus RIKEN cDNA 1200014P03 gene (1200014P03Rik) mRNA.                                                          |
| scd49983.22 274-S     | 1.12             | 1.16           | 1.26            | 1.04               | 0.77             | 0.94              | -0.23            | -0.56          | -0.33           | Ddr1          | NM_007594.1 | Mus musculus discoidin domain receptor family member 1 (Ddr1) mRNA.                                                    |
| scd49992.32 104-S     | 1.19             | 0.76           | 1.29            | 1.01               | 0.59             | 0.98              | -0.26            | -0.36          | -0.40           | Aif1          | NM_019467.2 | Mus musculus allograft inflammatory factor 1 (Aif1) mRNA.                                                              |
| scd50001.3.1 20-S     | 1.00             | 1.06           | 1.27            | 0.97               | 0.72             | 0.99              | -0.06            | -0.57          | -0.36           | Ng23          | XM_358322.1 | Mus musculus histocompatibility 2 complement component factor B (H2-Bf) mRNA.                                          |
| scd50010.18.1 105-S   | 1.22             | 0.85           | 1.15            | 1.07               | 0.62             | 0.97              | -0.23            | -0.46          | -0.24           | H2-Bf         | NM_008198.1 | Mus musculus histocompatibility 2 class II antigen E alpha (H2-Ea) mRNA.                                               |
| scd50024.4.1 14-S     | 0.92             | 1.13           | 1.55            | 0.76               | 0.88             | 1.31              | -0.28            | -0.37          | -0.25           | H2-Ea         | NM_010381.2 | Mus musculus histocompatibility 2 class II antigen E alpha (H2-Ea) mRNA.                                               |
| scd50025.7.1 85-S     | 1.11             | 1.07           | 1.65            | 0.90               | 0.71             | 1.01              | -0.30            | -0.58          | -0.72           | H2-Aa         | NM_010378.2 | Mus musculus histocompatibility 2 class II antigen E alpha (H2-Ea) mRNA.                                               |
| scd50027.1.1 35-S     | 1.02             | 0.99           | 1.46            | 0.99               | 0.94             | 1.18              | -0.05            | -0.42          | -0.36           | Pemb3         | NM_026855.1 | Mus musculus proteasome (prosome microproteasome) subunit beta type 9 (large multifunctional protease 2) (Pemb3) mRNA. |
| scd50069.32 1454 21-S | 1.09             | 1.04           | 1.56            | 0.99               | 0.88             | 1.14              | -0.24            | -0.18          | -0.33           | Nesr3         | NM_008713.1 | Mus musculus nucleosome assembly factor 3 (Nesr3) mRNA.                                                                |
| scd50134.9 8-S        | 1.08             | 1.06           | 1.38            | 0.94               | 0.75             | 1.00              | -0.20            | -0.49          | -0.46           | Nud3          | NM_019837.1 | Mus musculus nucleotide diphosphate linked moiety X1-type motif 3 (Nud3) mRNA.                                         |
| scd50198.3.1 17-S     | 0.95             | 1.08           | 1.32            | 0.89               | 0.99             | 1.06              | -0.08            | -0.12          | -0.33           | Ndufb10       | XM_128594.4 | Mus musculus NADH dehydrogenase (ubiquinone) 1 beta subcomplex 10 (Ndufb10) mRNA.                                      |
| scd50205.8 548-S      | 1.01             | 1.19           | 1.16            | 0.95               | 0.75             | 0.99              | -0.09            | -0.66          | -0.23           | Sc9a3r2       | NM_023055.1 | Mus musculus solute carrier family 9 (sodium/hydrogen exchanger) isoform 3 regulator 2 (Sc9a3r2) mRNA.                 |
| scd50206.42.1 126-S   | 1.03             | 1.05           | 1.20            | 0.88               | 0.96             | 1.02              | -0.23            | -0.12          | -0.24           | Tsc2          | NM_011647   | Mus musculus tuberous sclerosis 2 (Tsc2) mRNA.                                                                         |
| scd50218.10.128 2-S   | 0.93             | 1.07           | 1.18            | 0.92               | 0.79             | 1.05              | -0.01            | -0.43          | -0.17           | 5730457F11Rik | NM_172935   | Mus musculus RIKEN cDNA 5730457F11 gene (5730457F11Rik) mRNA.                                                          |
| scd50307.11.1 44-S    | 1.07             | 0.96           | 1.19            | 1.04               | 0.82             | 0.99              | -0.04            | -0.21          | -0.17           | Slc22a3       | NM_011395.1 | Mus musculus solute carrier family 22 (organic cation transporter) member 3 (Slc22a3) mRNA.                            |
| scd50396.10.5 23-S    | 0.89             | 1.05           | 1.41            | 0.97               | 0.71             | 1.07              | -0.13            | -0.34          | -0.13           | Man2          | NM_010830.1 | Mus musculus mannose 6-phosphate isomerase 2 (Man2) mRNA.                                                              |
| scd50399.22 481-S     | 0.96             | 1.06           | 1.24            | 0.89               | 0.85             | 1.08              | -0.12            | -0.32          | -0.19           | Tic2          | NM_026639   | Mus musculus tetrahydropteridine repeat domain 7 (Tic2) mRNA.                                                          |
| scd50402.5 409-S      | 0.99             | 1.12           | 1.51            | 0.88               | 0.88             | 1.35              | -0.17            | -0.34          | -0.17           | Soc5          | NM_019654.2 | Mus musculus suppressor of cytokine signaling 5 (Soc5) mRNA.                                                           |
| scd50503.16.1 7-S     | 0.94             | 1.06           | 1.13            | 0.81               | 0.94             | 0.97              | -0.25            | -0.17          | -0.23           | Spg4          | NM_016962   | Mus musculus spastic paraplegia 4 homolog (human) (Spg4) mRNA.                                                         |
| scd50509.4 211-S      | 1.04             | 1.30           | 1.35            | 0.96               | 0.83             | 1.08              | -0.12            | -0.60          | -0.33           | Lbh           | NM_029999.3 | Mus musculus limb-bud and heart (Lbh) mRNA.                                                                            |
| scd50604.11.1 29-S    | 1.06             | 1.03           | 1.12            | 1.02               | 0.71             | 0.97              | -0.06            | -0.52          | -0.21           | E130307M08Rik | NM_026530.2 | Mus musculus RIKEN cDNA E130307M08 gene (E130307M08Rik) mRNA.                                                          |
| scd50610.18.1 1-S     | 1.05             | 1.00           | 1.72            | 0.94               | 0.75             | 1.10              | -0.17            | -0.41          | -0.67           | Emr4          | NM_139138   | Mus musculus EGF-like module containing mucin-like hormone receptor-like sequence 4 (Emr4) mRNA.                       |
| scd50612.19.1 126-S   | 1.05             | 1.07           | 1.00            | 1.05               | 0.95             | 1.06              | -0.08            | -0.44          | -0.14           | Enpp5         | XM_383244.1 | Mus musculus ectonucleotide pyrophosphatase/phosphodiesterase 5 (Enpp5) mRNA.                                          |
| scd50698.5 378-S      | 0.93             | 1.16           | 1.22            | 0.93               | 0.83             | 1.10              | 0.00             | -0.47          | -0.14           | Enpp5         | NM_020033.1 | Mus musculus ectonucleotide pyrophosphatase/phosphodiesterase 5 (Enpp5) mRNA.                                          |
| scd50703.12.1 8-S     | 1.11             | 0.96           | 1.46            | 0.99               | 0.57             | 1.03              | -0.16            | -0.74          | -0.51           | Plazp7        | NM_013737.2 | Mus musculus phospholipase A2 group VII (platelet-activating factor acetylhydrolase plasma) (Plazp7) mRNA.             |
| scd50760.8.1 58-S     | 0.99             | 1.05           | 1.22            | 0.88               | 0.95             | 0.95              | -0.17            | -0.14          | -0.37           | Dhx16         | NM_026997.1 | Mus musculus DEAH (Asp-Glu-Ala-His) box polypeptide 16 (Dhx16) mRNA.                                                   |
| scd50768.5 1-S        | 1.02             | 1.02           | 1.24            | 0.87               | 0.70             | 1.04              | -0.24            | -0.53          | -0.25           | 2310014H01Rik | NM_355011.1 | Mus musculus RIKEN cDNA 2310014H01 gene (2310014H01Rik) mRNA.                                                          |
| scd50794.7.1 43-S     | 1.14             | 1.04           | 1.39            | 1.02               | 0.81             | 1.05              | -0.15            | -0.35          | -0.41           | C1cl1         | NM_033444.1 | Mus musculus chloride intracellular channel 1 (C1cl1) mRNA.                                                            |
| scd50795.8.1 75-S     | 1.04             | 1.03           | 1.22            | 0.96               | 0.77             | 1.01              | -0.11            | -0.41          | -0.27           | Dda2          | NM_016765   | Mus musculus dimethylarginine dimethylaminohydrolase 2 (Dda2) mRNA.                                                    |
| scd50819.9.8 414-S    | 0.98             | 1.08           | 1.17            | 0.98               | 0.89             | 1.17              | -0.02            | -0.28          | -0.23           | Phb2          | NM_017453.1 | Mus musculus pleckstrin homology like domain family member 2 (Phb2) mRNA.                                              |
| scd50827.12.1 175-S   | 0.97             | 1.09           | 1.31            | 0.88               | 0.82             | 1.16              | -0.15            | -0.40          | -0.16           | Tap2          | NM_011530.2 | Mus musculus transporter 2 ATP-binding cassette sub-family B (MDR/TAP) (Tap2) mRNA.                                    |
| scd50829.9.1 2-S      | 1.01             | 1.03           | 1.25            | 1.00               | 0.81             | 0.91              | -0.02            | -0.34          | -0.47           | Tap1          | NM_013683.1 | Mus musculus transporter 1 ATP-binding cassette sub-family B (MDR/TAP) (Tap1) mRNA.                                    |
| scd50833.5.1 17-S     | 1.03             | 1.06           | 1.32            | 1.01               | 0.81             | 0.95              | -0.04            | -0.39          | -0.48           | H2-Oa         | NM_008206   | Mus musculus histocompatibility 2 O region alpha locus (H2-Oa) mRNA.                                                   |
| scd50849.26.1 265-S   | 1.19             | 1.04           | 1.12            | 1.04               | 0.87             | 0.89              | -0.19            | -0.24          | -0.33           | Myo1f         | NM_053214.1 | Mus musculus myosin IF (Myo1f) mRNA.                                                                                   |
| scd50977.11.1 49-S    | 1.07             | 1.13           | 1.14            | 1.01               | 0.80             | 0.93              | -0.07            | -0.50          | -0.29           | 2400010G15Rik | NM_029524.2 | Mus musculus RIKEN cDNA 2400010G15 gene (2400010G15Rik) mRNA.                                                          |
| scd50992.26 310-S     | 0.95             | 1.13           | 1.24            | 0.85               | 0.89             | 1.11              | -0.17            | -0.33          | -0.16           | C1cn7         | NM_011930.2 | Mus musculus chloride channel 7 (C1cn7) mRNA.                                                                          |
| scd5101.143 30-S      | 0.95             | 1.09           | 1.30            | 0.97               | 0.78             | 0.98              | -0.08            | -0.61          | -0.23           | Pod1          | NM_013530.3 | Mus musculus polycystic kidney disease 1 homolog (Pod1) mRNA.                                                          |
| scd51065.1493 20-S    | 0.95             | 1.07           | 1.39            | 0.83               | 0.86             | 1.06              | -0.19            | -0.29          | -0.40           | Zfp160        | NM_145433.1 | Mus musculus zinc finger protein 160 (Zfp160) mRNA.                                                                    |
| scd51323.13.1 30-S    | 0.96             | 1.10           | 1.22            | 0.95               | 0.83             | 1.10              | -0.03            | -0.41          | -0.14           | Mpep1         | NM_172630.1 | Mus musculus metallophosphoesterase 1 (Mpep1) mRNA.                                                                    |
| scd51379.4 394-S      | 1.13             | 1.25           | 1.16            | 1.07               | 0.82             | 0.75              | -0.09            | -0.60          | -0.62           | 2010002N04Rik | NM_134133.1 | Mus musculus RIKEN cDNA 2010002N04 gene (2010002N04Rik) mRNA.                                                          |
| scd51531.20.1 18-S    | 1.00             | 1.13           | 1.16            | 0.97               | 0.87             | 1.00              | -0.06            | -0.37          | -0.21           | 1810057E01Rik | NM_030749.1 | Mus musculus RIKEN cDNA 1810057E01 gene (1810057E01Rik) mRNA.                                                          |
| scd51671.1.1 203-S    | 1.04             | 0.89           | 1.18            | 0.98               | 0.68             | 0.91              | -0.09            | -0.38          | -0.38           | AB023957      | NM_133237.1 | Mus musculus cDNA sequence AB023957 (AB023957) mRNA.                                                                   |
| scd51889.17.1 28-S    | 0.92             | 1.03           | 1.16            | 0.92               | 0.75             | 1.07              | -0.01            | -0.47          | -0.11           | Cst1r1        | NM_007779.1 | Mus musculus colony stimulating factor 1 receptor (Cst1r1) mRNA.                                                       |
| scd5203.9 35-S        | 1.06             | 0.94           | 1.55            | 1.02               | 0.71             | 1.07              | -0.05            | -0.39          | -0.54           | Nadp1         | XM_128893.3 | Mus musculus NADH family interacting protein 1 (Nadp1) mRNA.                                                           |
| scd52119.18 599-S     | 1.12             | 0.98           | 1.48            | 0.98               | 0.76             | 0.96              | -0.18            | -0.36          | -0.64           | Jmjd1b        | NM_029518.1 | Mus musculus jumonji domain containing 1B (Jmjd1b) mRNA.                                                               |
| scd52140.5.1 21-S     | 0.92             | 1.08           | 1.18            | 0.88               | 0.88             | 1.05              | -0.07            | -0.30          | -0.17           | Tap           | NM_021367.1 | Mus musculus thymic stromal lymphopoietin (Tap) mRNA.                                                                  |
| scd52458.4 47-S       | 1.00             | 1.06           | 1.19            | 0.98               | 0.78             | 1.00              | -0.02            | -0.43          | -0.25           | Slc25a28      | NM_145156.1 | Mus musculus solute carrier family 25 member 28 (Slc25a28) mRNA.                                                       |
| scd52593.10.1 23-S    | 1.02             | 1.04           | 1.40            | 0.91               | 0.91             | 1.16              | -0.16            | -0.19          | -0.27           | 5033414D02Rik | NM_026362.1 | Mus musculus RIKEN cDNA 5033414D02 gene (5033414D02Rik) mRNA.                                                          |
| scd52743.13.1 197-S   | 0.98             | 1.04           | 1.21            | 0.88               | 0.78             | 1.04              | -0.16            | -0.41          | -0.22           | Cd6           | NM_009852   | Mus musculus CD6 antigen (Cd6) mRNA.                                                                                   |
| scd52802.3.52 13-S    | 0.99             | 1.11           | 1.31            | 0.87               | 0.87             | 1.12              | -0.17            | -0.35          | -0.24           | Piprcap       | NM_016933.2 | Mus musculus protein tyrosine phosphatase receptor type C polypeptide-associated protein (Piprcap) mRNA.               |
| scd52806.22.1 43-S    | 0.95             | 1.12           | 1.30            | 0.91               | 0.83             | 1.19              | -0.07            | -0.42          | -0.13           | Piprnt1       | NM_008651.1 | Mus musculus protein tyrosine phosphatase receptor type C polypeptide-associated protein (Piprnt1) mRNA.               |
| scd5291.9 109-S       | 1.02             | 1.10           | 1.24            | 0.85               | 0.85             | 1.00              | -0.01            | -0.45          | -0.21           | Exra          | NM_007953.1 | Mus musculus estrogen related receptor alpha (Exra) mRNA.                                                              |
| scd52956.24.4 13-S    | 1.10             | 1.07           | 1.21            | 0.87               | 0.92             | 0.79              | -0.33            | -              |                 |               |             |                                                                                                                        |

| Gene Name           | Control<br>18 Hours | Control<br>1 Week | Control<br>4 Weeks | Treatment<br>18 Hours | Treatment<br>1 Week | Treatment<br>4 Weeks | Log2 FC<br>18 Hours | Log2 FC<br>1 Week | Log2 FC<br>4 Weeks | Symbol        | Accession   | Definition                                                                                                                                        |
|---------------------|---------------------|-------------------|--------------------|-----------------------|---------------------|----------------------|---------------------|-------------------|--------------------|---------------|-------------|---------------------------------------------------------------------------------------------------------------------------------------------------|
| scf54333.11 68-S    | 0.95                | 1.03              | 1.41               | 0.83                  | 0.97                | 1.16                 | -0.20               | -0.09             | -0.29              | Upl3b         | XM_110787.2 | Mus musculus UPF3 regulator of nonsense transcripts homolog B (yeast) (Upl3b) mRNA.                                                               |
| scf54409.6 0-S      | 1.01                | 1.04              | 1.25               | 0.86                  | 0.81                | 1.08                 | -0.23               | -0.35             | -0.21              | Tcte1l        | NM_025975.3 | Mus musculus t-complex-associated-testis-expressed 1-like (Tcte1l) mRNA.                                                                          |
| scf54562.12.1 64-S  | 1.01                | 0.96              | 1.33               | 0.86                  | 0.80                | 1.13                 | -0.25               | -0.26             | -0.24              | Alas2         | NM_009653.1 | Mus musculus aminolevulinic acid synthase 2 erythroid (Alas2) mRNA.                                                                               |
| scf54637.2 201-S    | 0.94                | 0.95              | 1.12               | 1.00                  | 0.75                | 1.02                 | 0.09                | -0.32             | -0.14              | Tmem35        | NM_026239.2 |                                                                                                                                                   |
| scf54683.4 267 43-S | 1.02                | 0.97              | 1.26               | 0.92                  | 0.81                | 1.02                 | -0.15               | -0.25             | -0.31              | 5730416F02Rik | XM_142024.3 | Mus musculus RIKEN cDNA 5730416F02 gene (5730416F02Rik) mRNA.                                                                                     |
| scf54735.22 173-S   | 0.94                | 1.19              | 1.40               | 0.81                  | 1.01                | 1.07                 | -0.21               | -0.22             | -0.39              | Ogt           | NM_138144.2 | Mus musculus O-linked N-acetylglucosamine (GlcNAc) transferase (UDP-N-acetylglucosamine:polypeptide-N-acetylglucosaminyl transferase) (Ogt) mRNA. |
| scf54851.7 89-S     | 1.07                | 0.94              | 1.11               | 0.96                  | 0.65                | 0.96                 | -0.17               | -0.51             | -0.21              | Bgn           | NM_007542.3 | Mus musculus biglycan (Bgn) mRNA.                                                                                                                 |
| scf54871.18 531-S   | 1.05                | 1.00              | 1.25               | 0.90                  | 0.77                | 1.07                 | -0.22               | -0.36             | -0.23              | Mimr1         | NM_016985.1 | Mus musculus myotubularin related protein 1 (Mimr1) mRNA.                                                                                         |
| scf55019.13 214-S   | 0.84                | 1.20              | 1.13               | 0.80                  | 0.90                | 1.03                 | -0.06               | -0.41             | -0.13              | Pctk1         | NM_011049.2 | Mus musculus PCTAIRE-motif protein kinase 1 (Pctk1) mRNA.                                                                                         |

| C                                 |      |      |      |      |      |      |       |      |      |               |             |                                                                                                           | Gene Name | Control 18 Hours | Control 1 Week | Control 4 Weeks | Treatment 18 Hours | Treatment 1 Week | Treatment 4 Weeks | Log2 FC 18 Hours | Log2 FC 1 Week | Log2 FC 4 Weeks | Symbol | Accession | Definition |
|-----------------------------------|------|------|------|------|------|------|-------|------|------|---------------|-------------|-----------------------------------------------------------------------------------------------------------|-----------|------------------|----------------|-----------------|--------------------|------------------|-------------------|------------------|----------------|-----------------|--------|-----------|------------|
| scf52948.3_447-S                  | 0.58 | 1.29 | 0.81 | 0.72 | 3.62 | 3.72 | 0.28  | 1.46 | 1.81 | Elovf3        | NM_007703.1 | Mus musculus elongation of very long chain fatty acids (FEN1/Elo2/SUR4/Elo3/yeast)-like 3 (Elovf3) mRNA.  |           |                  |                |                 |                    |                  |                   |                  |                |                 |        |           |            |
| scf000765.1_6-S                   | 0.85 | 1.18 | 0.89 | 0.70 | 2.97 | 3.43 | -0.23 | 1.36 | 1.77 | Insig2        | NM_178082.2 | Mus musculus insulin induced gene 2 (Insig2) mRNA.                                                        |           |                  |                |                 |                    |                  |                   |                  |                |                 |        |           |            |
| scf0227613.1_83-S                 | 1.00 | 0.87 | 0.96 | 0.82 | 3.17 | 2.57 | -0.27 | 1.87 | 1.41 | 4930542G03Rik | NM_146116.1 | Mus musculus RIKEN cDNA 4930542G03 gene (4930542G03Rik) mRNA.                                             |           |                  |                |                 |                    |                  |                   |                  |                |                 |        |           |            |
| scf000923.1_16-S                  | 0.91 | 1.13 | 0.84 | 0.69 | 2.23 | 2.31 | -0.37 | 1.03 | 1.38 | Insig2        | NM_178082.2 | Mus musculus insulin induced gene 2 (Insig2) mRNA.                                                        |           |                  |                |                 |                    |                  |                   |                  |                |                 |        |           |            |
| scf00331535.2_89-S                | 1.01 | 0.80 | 0.52 | 1.54 | 1.86 | 1.36 | 0.62  | 1.14 | 1.36 | Serpina7      | NM_177920.4 | Mus musculus insulin induced gene 2 (Insig2) mRNA.                                                        |           |                  |                |                 |                    |                  |                   |                  |                |                 |        |           |            |
| scf26719.6_100-S                  | 0.98 | 0.75 | 0.65 | 0.95 | 1.65 | 1.73 | -0.08 | 1.15 | 1.28 | Spon2         | NM_133903.2 | Mus musculus spondin 2 extracellular matrix protein (Spon2) mRNA.                                         |           |                  |                |                 |                    |                  |                   |                  |                |                 |        |           |            |
| scf326890.1_1-S                   | 0.41 | 1.07 | 0.96 | 0.45 | 2.24 | 1.99 | 0.08  | 1.06 | 1.14 | Aqp8          | NM_020474.1 | Mus musculus aquaporin 8 (Aqp8) mRNA.                                                                     |           |                  |                |                 |                    |                  |                   |                  |                |                 |        |           |            |
| scf0056695.1_175-S                | 0.95 | 0.97 | 0.93 | 0.75 | 2.04 | 2.02 | -0.28 | 1.11 | 1.12 | Bap17         | NM_019899.1 | Mus musculus brain protein 17 (Bap17) mRNA.                                                               |           |                  |                |                 |                    |                  |                   |                  |                |                 |        |           |            |
| scf52526.2_193-S                  | 0.85 | 0.79 | 1.08 | 0.72 | 2.21 | 2.41 | -0.25 | 1.52 | 1.11 | Ppp1r3c       | NM_016854.1 | Mus musculus protein phosphatase 1 regulatory (inhibitor) subunit 3C (Ppp1r3c) mRNA.                      |           |                  |                |                 |                    |                  |                   |                  |                |                 |        |           |            |
| scf36609.14.1_41-S                | 0.80 | 1.02 | 0.97 | 0.69 | 2.25 | 2.33 | -0.19 | 1.13 | 1.09 | Cfpx          | NM_011802.1 | Mus musculus caseinolytic protease X (E.coli) (Cfpx) mRNA.                                                |           |                  |                |                 |                    |                  |                   |                  |                |                 |        |           |            |
| scf0208715.1_140-S                | 1.16 | 0.69 | 0.71 | 1.16 | 1.52 | 1.54 | -0.04 | 1.17 | 1.08 | Hmgcs1        | NM_145942.2 | Mus musculus 3-hydroxy-3-methylglutaryl-Coenzyme A synthase 1 (Hmgcs1) mRNA.                              |           |                  |                |                 |                    |                  |                   |                  |                |                 |        |           |            |
| scf022146.5_240-S                 | 1.05 | 0.45 | 0.83 | 0.89 | 2.12 | 1.68 | -0.23 | 2.26 | 1.07 | Tuba6         | XM_147357.1 | Mus musculus tubulin alpha 6 (Tuba6) mRNA.                                                                |           |                  |                |                 |                    |                  |                   |                  |                |                 |        |           |            |
| scf40472.8_474-S                  | 1.11 | 0.72 | 0.60 | 0.94 | 1.51 | 1.24 | -0.24 | 1.07 | 1.06 | Slc1a4        | NM_018861.2 | Mus musculus solute carrier family 1 (glutamate/neutral amino acid transporter) member 4 (Slc1a4) mRNA.   |           |                  |                |                 |                    |                  |                   |                  |                |                 |        |           |            |
| scf47884.11.17_1-S                | 1.20 | 0.47 | 0.61 | 1.20 | 1.36 | 1.41 | -0.01 | 1.56 | 1.05 | Sggle         | NM_008270.2 | Mus musculus squalene epoxidase (Sggle) mRNA.                                                             |           |                  |                |                 |                    |                  |                   |                  |                |                 |        |           |            |
| scf314084.1_131-S                 | 0.95 | 1.01 | 0.73 | 0.80 | 1.33 | 1.47 | -0.26 | 0.40 | 1.03 | Aif5          | NM_030693.1 | Mus musculus activating transcription factor 5 (Aif5) mRNA.                                               |           |                  |                |                 |                    |                  |                   |                  |                |                 |        |           |            |
| scf25735.19_37-S                  | 0.64 | 1.02 | 0.93 | 0.50 | 2.30 | 1.86 | -0.34 | 1.11 | 1.01 | Hsp105        | NM_013559.1 | Mus musculus heat shock protein 105 (Hsp105) mRNA.                                                        |           |                  |                |                 |                    |                  |                   |                  |                |                 |        |           |            |
| scf32000.4_245-S                  | 0.84 | 0.97 | 0.90 | 0.67 | 2.46 | 1.85 | -0.33 | 1.28 | 0.99 | Bag3          | NM_013863.3 | Mus musculus Bcl2-associated athanogene 3 (Bag3) mRNA.                                                    |           |                  |                |                 |                    |                  |                   |                  |                |                 |        |           |            |
| scf015519.1_32-S                  | 0.86 | 1.07 | 0.94 | 0.63 | 2.09 | 1.83 | -0.44 | 0.95 | 0.99 | Hspca         | NM_010480   | Mus musculus heat shock protein 1 alpha (Hspca) mRNA.                                                     |           |                  |                |                 |                    |                  |                   |                  |                |                 |        |           |            |
| scf31369.3.1_132-S                | 0.70 | 1.38 | 0.85 | 0.69 | 2.37 | 1.67 | -0.02 | 0.77 | 0.98 | Fgl21         | NM_020013.2 | Mus musculus fibroblast growth factor 21 (Fgl21) mRNA.                                                    |           |                  |                |                 |                    |                  |                   |                  |                |                 |        |           |            |
| scf33605.4_245-S                  | 0.66 | 1.08 | 0.97 | 0.55 | 2.03 | 1.89 | -0.25 | 0.83 | 0.95 | Dnajb1        | NM_018908.1 | Mus musculus Dnaj (Hsp40) homolog subfamily B member 1 (Dnajb1) mRNA.                                     |           |                  |                |                 |                    |                  |                   |                  |                |                 |        |           |            |
| scf001819.1_157-S                 | 0.94 | 1.07 | 0.97 | 0.85 | 1.39 | 1.26 | -0.17 | 0.38 | 0.91 | St00a10       | NM_019012.1 | Mus musculus S100 calcium binding protein A10 (calpactin) (St00a10) mRNA.                                 |           |                  |                |                 |                    |                  |                   |                  |                |                 |        |           |            |
| scf0015519.1_143-S                | 0.99 | 0.91 | 0.73 | 0.89 | 1.49 | 1.48 | -0.34 | 0.93 | 0.91 | Hspca         | NM_010480   | Mus musculus heat shock protein 1 alpha (Hspca) mRNA.                                                     |           |                  |                |                 |                    |                  |                   |                  |                |                 |        |           |            |
| scf52792.14_158-S                 | 0.96 | 1.00 | 0.91 | 0.80 | 2.28 | 1.75 | -0.27 | 1.14 | 0.87 | Chka          | NM_013490.1 | Mus musculus choline kinase alpha (Chka) mRNA.                                                            |           |                  |                |                 |                    |                  |                   |                  |                |                 |        |           |            |
| scf52581.26.1_48-S                | 0.79 | 0.97 | 1.00 | 0.64 | 1.54 | 1.82 | -0.28 | 0.67 | 0.86 | Gldc          | NM_138595.1 | Mus musculus glycine decarboxylase (Gldc) mRNA.                                                           |           |                  |                |                 |                    |                  |                   |                  |                |                 |        |           |            |
| gl_21070949_ref NM_019639.2_531-S | 0.86 | 1.21 | 0.89 | 0.64 | 1.65 | 1.61 | -0.42 | 0.40 | 0.85 | Ubic          | XM_147315.1 | Mus musculus ubiquitin C (Ub) mRNA.                                                                       |           |                  |                |                 |                    |                  |                   |                  |                |                 |        |           |            |
| scf47279.22_242-S                 | 1.06 | 0.81 | 0.66 | 0.92 | 1.18 | 1.17 | -0.22 | 0.55 | 0.84 | Ncald         | NM_134094   | Mus musculus neurocalcin delta (Ncald) mRNA.                                                              |           |                  |                |                 |                    |                  |                   |                  |                |                 |        |           |            |
| scf00002494.1_23-S                | 1.07 | 0.58 | 0.83 | 1.09 | 1.37 | 1.52 | 0.02  | 1.25 | 0.83 | Sggle         | NM_009270.2 | Mus musculus squalene epoxidase (Sggle) mRNA.                                                             |           |                  |                |                 |                    |                  |                   |                  |                |                 |        |           |            |
| scf001819.1_157-S                 | 0.93 | 0.64 | 0.90 | 1.13 | 1.40 | 1.62 | 0.27  | 1.13 | 0.81 | Nsdhl         | NM_019431.3 | Mus musculus NAD(P) dependent steroid dehydrogenase-like (Nsdhl) mRNA.                                    |           |                  |                |                 |                    |                  |                   |                  |                |                 |        |           |            |
| scf48116.5_237-S                  | 0.81 | 1.01 | 1.03 | 0.64 | 1.03 | 0.84 | -0.44 | 0.76 | 0.81 | Claudin1      | NM_016174.2 | Mus musculus claudin 1 (Claudin1) mRNA.                                                                   |           |                  |                |                 |                    |                  |                   |                  |                |                 |        |           |            |
| scf28358.2_25-S                   | 0.95 | 0.86 | 0.99 | 0.89 | 1.57 | 1.74 | -0.08 | 0.86 | 0.80 | Avpr1a        | NM_016847.2 | Mus musculus arginine vasopressin receptor 1A (Avpr1a) mRNA.                                              |           |                  |                |                 |                    |                  |                   |                  |                |                 |        |           |            |
| scf0013195.2_156-S                | 1.04 | 0.87 | 1.05 | 0.79 | 3.21 | 1.76 | -0.38 | 1.85 | 0.78 | Ddc           | NM_016672.1 | Mus musculus dopa decarboxylase (Ddc) mRNA.                                                               |           |                  |                |                 |                    |                  |                   |                  |                |                 |        |           |            |
| scf001269.1_545-S                 | 0.54 | 1.01 | 0.93 | 0.50 | 1.57 | 1.61 | -0.12 | 0.62 | 0.78 | Lgals9        | NM_010708   | Mus musculus lectin galactose binding soluble 9 (Lgals9) mRNA.                                            |           |                  |                |                 |                    |                  |                   |                  |                |                 |        |           |            |
| scf018194.2_3-S                   | 0.99 | 0.60 | 0.80 | 1.26 | 1.26 | 1.41 | 0.33  | 1.10 | 0.78 | Nsdhl         | NM_010941.3 | Mus musculus NAD(P) dependent steroid dehydrogenase-like (Nsdhl) mRNA.                                    |           |                  |                |                 |                    |                  |                   |                  |                |                 |        |           |            |
| scf24826.5.1_34-S                 | 1.13 | 0.89 | 0.74 | 1.08 | 1.93 | 1.29 | -0.08 | 1.06 | 0.77 | Gale          | NM_178399.2 | Mus musculus galactose-4-epimerase UDP (Gale) mRNA.                                                       |           |                  |                |                 |                    |                  |                   |                  |                |                 |        |           |            |
| scf38304.3_230-S                  | 0.87 | 0.94 | 1.06 | 0.74 | 1.41 | 1.93 | -0.23 | 0.58 | 0.77 | Sdro          | NM_019431.3 | Mus musculus orphan short chain dehydrogenase/reductase (Sdro) mRNA.                                      |           |                  |                |                 |                    |                  |                   |                  |                |                 |        |           |            |
| scf37103.33_443-S                 | 0.87 | 1.07 | 1.01 | 0.87 | 1.63 | 1.61 | -0.37 | 0.83 | 0.74 | Tsp3          | NM_013769.2 | Mus musculus tight junction protein 3 (Tsp3) mRNA.                                                        |           |                  |                |                 |                    |                  |                   |                  |                |                 |        |           |            |
| scf00101670.1_34-S                | 0.91 | 1.01 | 1.02 | 0.70 | 1.27 | 1.67 | -0.38 | 0.31 | 0.73 | Cbs           | NM_144855.1 | Mus musculus cystathionine beta-synthase (Cbs) transcript variant 1 mRNA.                                 |           |                  |                |                 |                    |                  |                   |                  |                |                 |        |           |            |
| scf0012753.1_131-S                | 0.94 | 1.02 | 0.96 | 0.77 | 1.85 | 1.63 | -0.27 | 0.85 | 0.73 | Clock         | NM_007715.4 | Mus musculus circadian locomotor output cycles kaput (Clock) mRNA.                                        |           |                  |                |                 |                    |                  |                   |                  |                |                 |        |           |            |
| scf015903.3_124-S                 | 1.00 | 0.86 | 0.99 | 0.91 | 1.60 | 1.64 | -0.13 | 0.88 | 0.72 | Ikb3          | NM_008321.1 | Mus musculus inhibitor of DNA binding 3 (Ikb3) mRNA.                                                      |           |                  |                |                 |                    |                  |                   |                  |                |                 |        |           |            |
| scf19173.28.1_24-S                | 0.48 | 1.02 | 0.80 | 0.35 | 1.30 | 1.32 | -0.45 | 0.33 | 0.71 | Abcb11        | NM_021022.2 | Mus musculus ATP-binding cassette sub-family B (MDR/TAP) member 11 (Abcb11) mRNA.                         |           |                  |                |                 |                    |                  |                   |                  |                |                 |        |           |            |
| scf19972.14.1_18-S                | 0.97 | 1.03 | 0.90 | 0.87 | 1.51 | 1.42 | -0.16 | 0.56 | 0.70 | Sgk2          | NM_013731.1 | Mus musculus serum/glucocorticoid induced kinase 2 (Sgk2) mRNA.                                           |           |                  |                |                 |                    |                  |                   |                  |                |                 |        |           |            |
| scf000370.1_1-S                   | 0.98 | 0.84 | 1.20 | 0.86 | 2.04 | 1.84 | -0.17 | 1.30 | 0.70 | 1600020H07Rik | NM_019475.2 | Mus musculus RIKEN cDNA 1600020H07 gene (1600020H07Rik) mRNA.                                             |           |                  |                |                 |                    |                  |                   |                  |                |                 |        |           |            |
| scf022147.3_29-S                  | 1.00 | 0.68 | 0.82 | 0.99 | 1.45 | 1.82 | -0.11 | 1.51 | 0.69 | Tuba3         | NM_008449.2 | Mus musculus tubulin alpha 7 (Tuba3) mRNA.                                                                |           |                  |                |                 |                    |                  |                   |                  |                |                 |        |           |            |
| scf0013121.2_8-S                  | 1.05 | 0.52 | 0.72 | 1.21 | 1.16 | 1.19 | 0.21  | 1.14 | 0.69 | Cyp51         | NM_020010.1 | Mus musculus cytochrome P450 51 (Cyp51) mRNA.                                                             |           |                  |                |                 |                    |                  |                   |                  |                |                 |        |           |            |
| scf6640.8_209-S                   | 1.03 | 0.85 | 0.65 | 1.03 | 1.29 | 1.03 | 0.00  | 0.60 | 0.68 | Nt5e          | NM_011851.2 | Mus musculus 5' nucleotidase ecto (Nt5e) mRNA.                                                            |           |                  |                |                 |                    |                  |                   |                  |                |                 |        |           |            |
| scf0002504.1_31-S                 | 1.01 | 0.83 | 0.92 | 0.92 | 1.58 | 1.47 | -0.13 | 0.92 | 0.68 | Aif4          | NM_009716   | Mus musculus activating transcription factor 4 (Aif4) mRNA.                                               |           |                  |                |                 |                    |                  |                   |                  |                |                 |        |           |            |
| scf068337.8_322-S                 | 0.85 | 0.92 | 0.92 | 0.81 | 1.85 | 1.47 | -0.06 | 1.00 | 0.68 | Crip2         | NM_024223.1 | Mus musculus cysteine rich protein 2 (Crip2) mRNA.                                                        |           |                  |                |                 |                    |                  |                   |                  |                |                 |        |           |            |
| scf0015516.2_144-S                | 0.56 | 1.04 | 0.99 | 0.48 | 1.50 | 1.55 | -0.25 | 0.50 | 0.66 | Hspcb         | NM_008302.2 | Mus musculus heat shock protein 1 beta (Hspcb) mRNA.                                                      |           |                  |                |                 |                    |                  |                   |                  |                |                 |        |           |            |
| scf0002696.1_5-S                  | 0.66 | 0.96 | 1.04 | 0.61 | 1.75 | 1.63 | -0.12 | 0.84 | 0.65 | Opr51         | NM_011014.1 | Mus musculus opioid receptor sigma 1 (Opr51) mRNA.                                                        |           |                  |                |                 |                    |                  |                   |                  |                |                 |        |           |            |
| scf0006579.1_109-S                | 0.98 | 0.88 | 0.90 | 0.99 | 1.45 | 1.17 | -0.42 | 0.60 | 0.63 | 1810045K07Rik | NM_020432.2 | Mus musculus RIKEN cDNA 1810045K07 gene (1810045K07Rik) mRNA.                                             |           |                  |                |                 |                    |                  |                   |                  |                |                 |        |           |            |
| scf37681.14_50-S                  | 1.64 | 0.57 | 0.64 | 1.29 | 1.16 | 1.00 | -0.33 | 0.98 | 0.85 | Sc41a2        | NM_177388.2 | Mus musculus RIKEN cDNA 1810045K07 gene (1810045K07Rik) mRNA.                                             |           |                  |                |                 |                    |                  |                   |                  |                |                 |        |           |            |
| scf0003202.1_259-S                | 0.96 | 0.83 | 0.99 | 0.73 | 1.39 | 1.55 | -0.39 | 0.72 | 0.65 | Gliap1        | NM_016739.2 | Mus musculus GPI-anchored membrane protein 1 (Gliap1) mRNA.                                               |           |                  |                |                 |                    |                  |                   |                  |                |                 |        |           |            |
| scf020610.4_145-S                 | 0.93 | 1.03 | 0.95 | 0.90 | 1.38 | 1.47 | -0.04 | 0.42 | 0.64 | Sumo3         | NM_019929   | Mus musculus cystathionase (cystathionine gamma-lyase) (Cth) mRNA.                                        |           |                  |                |                 |                    |                  |                   |                  |                |                 |        |           |            |
| scf0002141.1_52-S                 | 0.93 | 0.98 | 0.99 | 0.77 | 1.14 | 1.53 | -0.25 | 0.20 | 0.64 | Cth           | NM_145953.2 | Mus musculus cystathionase (cystathionine gamma-lyase) (Cth) mRNA.                                        |           |                  |                |                 |                    |                  |                   |                  |                |                 |        |           |            |
| scf47732.2_4-S                    | 0.94 | 0.98 | 0.90 | 0.89 | 1.46 | 1.39 | -0.07 | 0.57 | 0.63 | Aif4          | XM_139474.1 | Mus musculus activating transcription factor 4 (Aif4) mRNA.                                               |           |                  |                |                 |                    |                  |                   |                  |                |                 |        |           |            |
| scf0001304.1_8-S                  | 0.87 | 1.01 | 1.04 | 0.79 | 1.39 | 1.61 | -0.12 | 0.45 | 0.63 | 4930579A11Rik | NM_029478.2 | Mus musculus RIKEN cDNA 4930579A11 gene (4930579A11Rik) mRNA.                                             |           |                  |                |                 |                    |                  |                   |                  |                |                 |        |           |            |
| scf25707.8.1_1-S                  | 1.02 | 0.86 | 0.82 | 1.00 | 1.23 | 1.28 | -0.03 | 0.50 | 0.62 | Mad22         | NM_027985.1 | Mus musculus MAD2 mitotic arrest deficient-like 2 (yeast) (Mad22) mRNA.                                   |           |                  |                |                 |                    |                  |                   |                  |                |                 |        |           |            |
| scf014029.9_22-S                  | 1.41 | 0.65 | 0.69 | 1.00 | 1.24 | 1.02 | -0.56 | 0.83 | 0.62 | Hsp5          | NM_024732.2 | Mus musculus heat shock 70kD protein 5 (glucose-regulated protein) (Hsp5) mRNA.                           |           |                  |                |                 |                    |                  |                   |                  |                |                 |        |           |            |
| scf49316.10.1_12-S                | 1.25 | 0.78 | 0.70 | 0.97 | 1.09 | 1.06 | -0.37 | 0.47 | 0.60 | Dnajb11       | NM_146071.1 | Mus musculus Dnaj (Hsp40) homolog subfamily B member 11 (Dnajb11) mRNA.                                   |           |                  |                |                 |                    |                  |                   |                  |                |                 |        |           |            |
| scf0231070.3_29-S                 | 0.74 | 0.89 | 1.10 | 0.69 | 1.63 | 1.68 | -0.10 | 0.86 | 0.60 | Insig1        | NM_153526.2 | Mus musculus insulin induced gene 1 (Insig1) mRNA.                                                        |           |                  |                |                 |                    |                  |                   |                  |                |                 |        |           |            |
| scf35308.7.1_3-S                  | 0.92 | 1.08 | 1.11 | 0.80 | 1.68 | 1.68 | -0.20 | 0.67 | 0.60 | Tmie          | NM_146260.1 | Mus musculus transmembrane inner ear (Tmie) mRNA.                                                         |           |                  |                |                 |                    |                  |                   |                  |                |                 |        |           |            |
| scf51825.4_405-S                  | 1.28 | 0.71 | 0.60 | 1.27 | 1.19 | 0.91 | -0.02 | 0.75 | 0.60 | 2310057H16Rik | NM_026473.2 | Mus musculus RIKEN cDNA 2310057H16 gene (2310057H16Rik) mRNA.                                             |           |                  |                |                 |                    |                  |                   |                  |                |                 |        |           |            |
| scf0107375.1_234-S                | 1.11 | 0.72 | 0.79 | 0.86 | 1.45 | 1.18 | -0.38 | 1.03 | 0.59 | AW491445      | NM_134154.1 | Mus musculus expressed sequence AW491445 (AW491445) mRNA.                                                 |           |                  |                |                 |                    |                  |                   |                  |                |                 |        |           |            |
| scf076061.4_15-S                  | 0.87 | 0.96 | 1.02 | 0.75 | 1.41 | 1.53 | -0.21 | 0.54 | 0.59 | Sdro          | NM_027301.3 | Mus musculus orphan short chain dehydrogenase/reductase (Sdro) mRNA.                                      |           |                  |                |                 |                    |                  |                   |                  |                |                 |        |           |            |
| scf068917.1_123-S                 | 0.76 | 1.07 | 0.97 | 0.67 | 1.94 | 1.44 | -0.18 | 0.86 | 0.58 | Chordc1       | NM_026444.1 | Mus musculus cysteine and histidine-rich domain (CHORD) containing zinc-binding protein 1 (Chordc1) mRNA. |           |                  |                |                 |                    |                  |                   |                  |                |                 |        |           |            |
| scf25384.3.9_24-S                 | 1.48 | 0.67 | 0.62 | 1.23 | 1.17 | 0.92 | -0.26 | 0.79 | 0.58 | Armet         | NM_022103.1 | Mus musculus arginine-rich mutated in early stage tumors (Armet) mRNA.                                    |           |                  |                |                 |                    |                  |                   |                  |                |                 |        |           |            |
| scf018194.8_27-S                  | 1.01 | 0.57 | 0.73 | 1.22 | 1.20 | 1.12 | 0.26  | 1.10 | 0.57 | Nsdhl         | NM_010941.3 | Mus musculus NAD(P) dependent steroid dehydrogenase-like (Nsdhl) mRNA.                                    |           |                  |                |                 |                    |                  |                   |                  |                |                 |        |           |            |
| scf36609.1.1613_78-S              | 1.01 | 0.85 | 0.93 | 0.74 | 1.85 | 1.37 | -0.44 | 1.14 | 0.57 | Pagr9         | NM_198414.1 | Mus musculus NAD(P) dependent steroid dehydrogenase-like (Nsdhl) mRNA.                                    |           |                  |                |                 |                    |                  |                   |                  |                |                 |        |           |            |
| scf00101502.1_299-S               | 0.95 | 0.95 | 0.90 | 0.80 | 1.42 | 1.32 | -0.24 | 0.59 | 0.56 | Hsd3b7        | NM_133943.1 | Mus musculus hydroxy-delta-5-steroid dehydrogenase 3 beta- and steroid delta-isomerase 7 (Hsd3b7) mRNA.   |           |                  |                |                 |                    |                  |                   |                  |                |                 |        |           |            |
| scf0020610.2_127-S                | 0.93 | 1.07 | 0.95 | 0.89 | 1.42 | 1.40 | -0.07 | 0.41 | 0.56 | Sum3          | NM_019929.1 | Mus musculus cystathionase (cystathionine gamma-lyase) (Cth) mRNA.                                        |           |                  |                |                 |                    |                  |                   |                  |                |                 |        |           |            |
| scf0112407.7_41-S                 | 0.79 | 1.11 | 0.93 | 0.93 | 1.79 | 1.40 | -0.07 | 0.68 | 0.58 | Egr3          | NM_028133.1 | Mus musculus EGR nine homolog 3 (C. elegans) (Egr3) mRNA.                                                 |           |                  |                |                 |                    |                  |                   |                  |                |                 |        |           |            |
| scf0001344.1_14-S                 | 0.77 | 0.92 | 1.02 | 0.71 | 1.45 | 1.51 | -0.27 | 0.49 | 0.55 | 4930579A11Rik | NM_029478.2 | Mus musculus RIKEN cDNA 4930579A11 gene (4930579A11Rik) mRNA.                                             |           |                  |                |                 |                    |                  |                   |                  |                |                 |        |           |            |
| scf47523.9_497-S                  | 0.88 | 1.05 | 0.86 | 0.73 | 1.29 | 1.26 | -0.26 | 0.29 | 0.55 | Gpd1          | NM_010271.2 | Mus musculus glycerol-3-phosphate dehydrogenase 1 (soluble) (Gpd1) mRNA.                                  |           |                  |                |                 |                    |                  |                   |                  |                |                 |        |           |            |
| scf0319186.1_75-S                 | 0.99 | 0.98 | 0.91 | 0.97 | 1.08 | 1.32 | -0.01 | 0.14 | 0.55 | Hist1h2bm     | NM_178200   | Mus musculus histone 1 H2bm (Hist1h2bm) mRNA.                                                             |           |                  |                |                 |                    |                  |                   |                  |                |                 |        |           |            |
| scf00225358.2_258-S               | 0.95 | 0.92 | 0.94 | 0.86 | 1.35 | 1.37 | -0.15 | 0.54 | 0.55 | 2810024E20Rik | NM_146084.1 | Mus musculus RIKEN cDNA 2810024E20 gene (2810024E20Rik) mRNA.                                             |           |                  |                |                 |                    |                  |                   |                  |                |                 |        |           |            |
| scf0224530.9_22-S                 | 0.86 | 0.90 | 1.12 | 0.83 | 1.42 | 1.62 | -0.07 | 0.65 | 0.54 | Acat3         | NM_153151.1 | Mus musculus acetyl-Coenzyme A acetyltransferase 3 (Acat3) mRNA.                                          |           |                  |                |                 |                    |                  |                   |                  |                |                 |        |           |            |
| scf0003272.1_5-S                  | 0.87 | 0.91 | 1.10 | 0.85 | 1.43 | 1.58 | -0.02 | 0.64 | 0.53 | Fpgs          | NM_010236.1 | Mus musculus foxyolipolyglutamylyl synthetase (Fpgs) mRNA.                                                |           |                  |                |                 |                    |                  |                   |                  |                |                 |        |           |            |
| scf00319800.1_48-S                | 0.52 | 0.88 | 1.19 | 0.43 | 1.34 | 1.69 | -0.26 | 0.64 | 0.53 | C730048C13Rik | NM_177002.2 | Mus musculus RIKEN cDNA C730048C13 gene (C730048C13Rik) mRNA.                                             |           |                  |                |                 |                    |                  |                   |                  |                |                 |        |           |            |
| scf5102.59.                       |      |      |      |      |      |      |       |      |      |               |             |                                                                                                           |           |                  |                |                 |                    |                  |                   |                  |                |                 |        |           |            |

| Gene Name             | Control<br>18 Hours | Control<br>1 Week | Control<br>4 Weeks | Treatment<br>18 Hours | Treatment<br>1 Week | Treatment<br>4 Weeks | Log2 FC<br>18 Hours | Log2 FC<br>1 Week | Log2 FC<br>4 Weeks | Symbol        | Accession   | Definition                                                                                              |
|-----------------------|---------------------|-------------------|--------------------|-----------------------|---------------------|----------------------|---------------------|-------------------|--------------------|---------------|-------------|---------------------------------------------------------------------------------------------------------|
| scf47390.18.104.38-S  | 0.97                | 0.86              | 0.91               | 0.84                  | 1.56                | 1.26                 | -0.21               | 0.87              | 0.47               | Tars          | NM_033074.2 | Mus musculus threonyl-tRNA synthetase (Tars) mRNA                                                       |
| scf0110960.1.77-S     | 0.86                | 1.02              | 1.03               | 0.73                  | 1.81                | 1.42                 | -0.23               | 0.84              | 0.47               | Tars          | NM_033074.2 | Mus musculus threonyl-tRNA synthetase (Tars) mRNA                                                       |
| scf38496.5.152-S      | 0.63                | 1.06              | 0.93               | 0.39                  | 1.50                | 1.18                 | -0.69               | 0.47              | 0.47               | Dusp6         | NM_026268.1 | Mus musculus dual specificity phosphatase 6 (Dusp6) mRNA                                                |
| scf020442.2.266-S     | 1.22                | 0.71              | 0.70               | 1.02                  | 1.18                | 0.97                 | -0.25               | 0.72              | 0.47               | Siat4a        | NM_009177.2 | Mus musculus sialyltransferase 4A (beta-galactoside alpha-23-sialyltransferase) (Siat4a) mRNA           |
| scf0207818.1.83-S     | 0.98                | 0.87              | 0.98               | 0.92                  | 1.87                | 1.45                 | -0.20               | 0.53              | 0.48               | BC034728      | NM_174392.2 | Mus musculus eukaryotic translation initiation factor 3 (gamma) 2 (Eif4g2) mRNA                         |
| scf0001144.1.51-S     | 0.95                | 0.94              | 0.81               | 0.93                  | 1.20                | 1.11                 | -0.09               | 0.35              | 0.48               | A03007L17Rik  | NM_02637.2  | Mus musculus RIKEN cDNA A03007L17 gene (A03007L17Rik) mRNA                                              |
| scf32330.10.515-S     | 0.93                | 1.15              | 0.98               | 0.79                  | 1.60                | 1.33                 | -0.24               | 0.49              | 0.48               | Zfpm1         | NM_009569.1 | Mus musculus zinc finger protein multitype 1 (Zfpm1) mRNA                                               |
| scf00224530.2.63-S    | 0.94                | 0.86              | 1.14               | 0.85                  | 1.37                | 1.54                 | -0.13               | 0.67              | 0.45               | Acac3         | NM_153151.1 | Mus musculus acetyl-Coenzyme A acetyltransferase 3 (Acac3) mRNA                                         |
| scf018391.1.236-S     | 0.90                | 1.05              | 0.99               | 0.76                  | 1.64                | 1.35                 | -0.24               | 0.62              | 0.44               | Opr1          | NM_011014.1 | Mus musculus opioid receptor sigma 1 (Opr1) mRNA                                                        |
| scf016691.2.87-S      | 0.96                | 0.93              | 0.81               | 0.97                  | 1.27                | 1.10                 | 0.01                | 0.44              | 0.44               | Krt18         | NM_031170.1 | Mus musculus keratin complex 2 basic gene 8 (Krt18) mRNA                                                |
| scf0015568.1.223-S    | 0.96                | 1.05              | 0.95               | 0.76                  | 1.46                | 1.29                 | -0.34               | 0.47              | 0.44               | Elavl1        | NM_010485.2 | Mus musculus ELAV (embryonal lethal abnormal vision Drosophila)-like 1 (Hu antigen R) (Elavl1) mRNA     |
| scf009010.1.44.5-S    | 0.67                | 0.89              | 0.97               | 0.92                  | 1.10                | 1.45                 | -0.20               | 0.43              | 0.43               | Eif4g2        | NM_174392.2 | Mus musculus eukaryotic translation initiation factor 3 (gamma) 2 (Eif4g2) mRNA                         |
| scf46851.11.365.17-S  | 0.90                | 1.02              | 0.97               | 0.86                  | 1.34                | 1.32                 | -0.07               | 0.41              | 0.44               | Ecgt1         | NM_138302.1 | Mus musculus endothelial cell growth factor 1 (platelet-derived) (Ecgt1) mRNA                           |
| scf3784.2.158-S       | 0.81                | 0.99              | 1.09               | 0.75                  | 1.42                | 1.45                 | -0.10               | 0.56              | 0.43               | Inhbc         | NM_010565.2 | Mus musculus inhibin beta-C (Inhbc) mRNA                                                                |
| scf001658.1.57-S      | 0.78                | 0.95              | 1.14               | 0.76                  | 1.48                | 1.53                 | -0.03               | 0.62              | 0.43               | Acac2         | NM_009338   | Mus musculus acetyl-Coenzyme A acetyltransferase 2 (Acac2) mRNA                                         |
| scf31848.11.248-S     | 1.03                | 0.79              | 0.91               | 1.06                  | 1.38                | 1.27                 | 0.04                | 0.84              | 0.43               | Dhcr7         | NM_007856.2 | Mus musculus 7-dehydrocholesterol reductase (Dhcr7) mRNA                                                |
| scf0020280.2.23-S     | 0.86                | 0.94              | 0.96               | 0.60                  | 1.35                | 1.29                 | -0.50               | 0.55              | 0.43               | Scp2          | NM_011327.1 | Mus musculus sterol carrier protein 2 liver (Scp2) mRNA                                                 |
| scf0012116.2.283-S    | 1.08                | 1.02              | 0.74               | 0.72                  | 1.22                | 0.99                 | -0.58               | 0.27              | 0.42               | Bhmt          | NM_016668.2 | Mus musculus betaine-homocysteine methyltransferase (Bhmt) mRNA                                         |
| scf40883.5.194-S      | 0.45                | 0.83              | 1.29               | 0.31                  | 2.71                | 1.53                 | -0.37               | 1.86              | 0.42               | Gdp           | NM_008761.2 | Mus musculus glucose-6-phosphate catalytic (Gdp) mRNA                                                   |
| scf39632.23.1463.24-S | 0.92                | 1.00              | 0.87               | 0.67                  | 1.22                | 1.15                 | -0.45               | 0.27              | 0.42               | Kpnb1         | NM_008379.2 | Mus musculus karyopherin (importin) beta 1 (Kpnb1) mRNA                                                 |
| scf0016796.1.242-S    | 0.98                | 0.89              | 0.95               | 0.78                  | 1.33                | 1.27                 | -0.35               | 0.59              | 0.42               | Lasp1         | NM_010688.2 | Mus musculus LIM and SH3 protein 1 (Lasp1) mRNA                                                         |
| scf00231070.1.184-S   | 0.66                | 0.90              | 1.11               | 0.63                  | 1.54                | 1.48                 | -0.07               | 0.76              | 0.42               | Insig1        | NM_153526.2 | Mus musculus insulin induced gene 1 (Insig1) mRNA                                                       |
| scf056876.17.315-S    | 0.97                | 1.01              | 0.87               | 0.79                  | 1.32                | 1.15                 | -0.29               | 0.37              | 0.41               | Nelf          | NM_020276.2 | Mus musculus nasal embryonic LHRH factor (Nelf) mRNA                                                    |
| scf067437.2.28-S      | 1.23                | 0.93              | 0.72               | 1.08                  | 1.04                | 0.96                 | -0.17               | 0.17              | 0.41               | Ser3          | NM_026155.1 | Mus musculus signal sequence receptor gamma (Ser3) mRNA                                                 |
| scf0076650.1.42-S     | 0.87                | 1.16              | 0.93               | 0.73                  | 1.30                | 1.24                 | -0.26               | 0.16              | 0.41               | Nr3           | NM_029688.2 | Mus musculus pelota homolog (Drosophila) (Pelo) mRNA                                                    |
| scf105083.1.137-S     | 0.89                | 0.92              | 0.97               | 0.76                  | 1.51                | 1.29                 | -0.23               | 0.71              | 0.41               | Pilo          | NM_134058.1 | Mus musculus pilosus (Pilo) mRNA                                                                        |
| scf054455.3.23-S      | 1.40                | 0.78              | 0.72               | 1.29                  | 1.40                | 0.95                 | -0.10               | 0.69              | 0.41               | Dncl1         | NM_019482.1 | Mus musculus dyx11 cytoplasmic lynch chain 1 (Dncl1) mRNA                                               |
| scf066624.1.138-S     | 1.22                | 0.68              | 0.66               | 1.09                  | 1.09                | 0.87                 | -0.16               | 0.68              | 0.41               | 573040615Rik  | NM_025668.1 | Mus musculus RIKEN cDNA 573040615 gene (573040615Rik) mRNA                                              |
| scf002018.5.51-S      | 1.03                | 0.92              | 0.88               | 0.91                  | 1.42                | 1.17                 | -0.17               | 0.63              | 0.41               | Srpb          | NM_009275.2 | Mus musculus signal recognition particle receptor B subunit (Srpb) mRNA                                 |
| scf32101.7.1.5-S      | 1.16                | 0.93              | 0.84               | 0.96                  | 1.32                | 1.12                 | -0.26               | 0.51              | 0.41               | D7Wsu128e     | NM_138589   | Mus musculus DNA segment Chr 7 Wayne State University 128 expressed (D7Wsu128e) mRNA                    |
| scf0003640.1.4-S      | 0.83                | 0.98              | 0.99               | 0.81                  | 1.22                | 1.31                 | -0.03               | 0.32              | 0.40               | Pfcd2         | XM_127497.2 | Mus musculus ring finger protein 10 (Rnf10) mRNA                                                        |
| scf26162.14.72.6-S    | 0.73                | 1.00              | 0.98               | 0.68                  | 1.16                | 1.29                 | -0.12               | 0.21              | 0.40               | Rnf10         | NM_016698   | Mus musculus ring finger protein 10 (Rnf10) mRNA                                                        |
| scf32570.6.1.25-S     | 0.69                | 0.96              | 1.10               | 0.61                  | 1.49                | 1.44                 | -0.16               | 0.64              | 0.40               | H47           | NM_024028.2 | Mus musculus histone polycomb 47 (H47) mRNA                                                             |
| scf000894.1.229e3-S   | 0.75                | 0.97              | 1.06               | 0.62                  | 1.28                | 1.30                 | -0.20               | 0.46              | 0.40               | Irf6          | NM_016851.1 | Mus musculus interferon regulatory factor 6 (Irf6) mRNA                                                 |
| scf21513.14.14.14-S   | 1.22                | 0.69              | 0.72               | 1.16                  | 1.22                | 0.95                 | -0.09               | 0.83              | 0.40               | 231008M10Rik  | NM_025509.2 | Mus musculus RIKEN cDNA 231008M10 gene (231008M10Rik) mRNA                                              |
| scf0010196.3.64-S     | 1.00                | 0.65              | 0.81               | 1.13                  | 1.32                | 1.10                 | 0.16                | 1.09              | 0.39               | Fdps          | NM_134469.2 | Mus musculus farnesyl diphosphate synthetase (Fdps) mRNA                                                |
| scf0001829.1.310-S    | 1.08                | 0.86              | 0.87               | 1.01                  | 1.41                | 1.14                 | -0.06               | 0.71              | 0.39               | 1110025G12Rik | NM_029844.1 | Mus musculus RIKEN cDNA 1110025G12 gene (1110025G12Rik) mRNA                                            |
| scf000543.1.10-S      | 1.04                | 0.89              | 1.01               | 0.89                  | 1.10                | 1.32                 | -0.22               | 0.31              | 0.39               | 1810055E12Rik | NM_026437.1 | Mus musculus RIKEN cDNA 1810055E12 gene (1810055E12Rik) mRNA                                            |
| scf0003620.1.13-S     | 0.92                | 0.84              | 1.10               | 0.86                  | 1.27                | 1.43                 | -0.09               | 0.60              | 0.38               | Slc17a3       | NM_134069.2 | Mus musculus solute carrier family 17 (sodium phosphate) member 3 (Slc17a3) mRNA                        |
| scf054325.6.160-S     | 1.07                | 0.91              | 0.91               | 0.94                  | 1.57                | 1.18                 | -0.19               | 0.79              | 0.38               | Elovl1        | NM_019429.1 | Mus musculus elongation of very long chain fatty acids (FEN1/Elo2 SUR4/Elo3 yeast-like 1 (Elovl1) mRNA  |
| scf000304.1.9-S       | 0.95                | 1.00              | 0.99               | 0.85                  | 1.20                | 1.25                 | -0.05               | 0.32              | 0.38               | Gonap2        | NM_020352.2 | Mus musculus gonapontin receptor 2 (Gonap2) mRNA                                                        |
| scf056397.1.158-S     | 1.10                | 0.88              | 0.85               | 0.93                  | 1.37                | 1.11                 | -0.24               | 0.64              | 0.38               | Morfa2        | NM_019768.2 | Mus musculus mortality factor 4 like 2 (Morfa2) mRNA                                                    |
| scf0003068.1.5-S      | 0.95                | 0.96              | 1.00               | 0.73                  | 1.65                | 1.31                 | -0.38               | 0.78              | 0.38               | Sec23b        | NM_019787.2 | Mus musculus SEC23B (S. cerevisiae) (Sec23b) mRNA                                                       |
| scf083767.9.235-S     | 0.96                | 1.13              | 0.93               | 0.89                  | 1.23                | 1.21                 | -0.12               | 0.12              | 0.38               | Waa1          | NM_031877.2 | Mus musculus WASP family 1 (Waa1) mRNA                                                                  |
| scf059038.1.6-S       | 0.97                | 1.03              | 0.97               | 0.90                  | 1.43                | 1.26                 | -0.12               | 0.47              | 0.38               | Pmp4          | NM_021534.2 | Mus musculus peroxisomal membrane protein 4 (Pmp4) mRNA                                                 |
| scf0004156.1.115-S    | 0.59                | 0.99              | 1.03               | 0.59                  | 1.29                | 1.33                 | 0.01                | 0.38              | 0.38               | 1600019D15Rik | NM_028975.2 | Mus musculus RIKEN cDNA 1600019D15 gene (1600019D15Rik) mRNA                                            |
| scf0067242.1.20-S     | 0.88                | 0.98              | 0.98               | 0.86                  | 1.12                | 1.27                 | -0.03               | 0.20              | 0.38               | Gemin6        | NM_026553.1 | Mus musculus gem (nuclear organelle) associated protein 6 (Gemin6) mRNA                                 |
| scf0001945.1.52-S     | 0.93                | 1.01              | 1.01               | 0.93                  | 1.41                | 1.30                 | -0.11               | 0.71              | 0.37               | Snu7          | NM_031162.2 | Mus musculus snRNA small nuclear ribonucleoprotein 7 (Snu7) mRNA                                        |
| scf0000510.1.2-S      | 0.82                | 0.88              | 1.00               | 1.03                  | 1.40                | 1.32                 | 0.33                | 0.67              | 0.37               | Xm            | NM_129087.4 | Mus musculus transmembrane 7 superfamily member 2 (Tm7sf2) mRNA                                         |
| scf27301.8.458-S      | 0.86                | 1.20              | 0.97               | 0.53                  | 1.36                | 1.19                 | -0.70               | 0.19              | 0.37               | Tbx3          | NM_011535.2 | Mus musculus T-box 3 (Tbx3) transcript variant 2 mRNA                                                   |
| scf21852.5.6-S        | 0.96                | 1.01              | 0.89               | 0.93                  | 1.18                | 1.15                 | -0.04               | 0.22              | 0.36               | Psmc4         | NM_008951.1 | Mus musculus proteasome (prosome macropain) 26S subunit non-ATPase 4 (Psmc4) mRNA                       |
| scf015387.16.11-S     | 0.86                | 0.93              | 1.10               | 0.77                  | 1.19                | 1.40                 | -0.14               | 0.36              | 0.36               | HnrpK         | NM_025279.1 | Mus musculus heterogeneous nuclear ribonucleoprotein K (HnrpK) mRNA                                     |
| scf056436.9.4-S       | 0.72                | 1.01              | 0.95               | 0.67                  | 1.29                | 1.21                 | -0.09               | 0.34              | 0.36               | Adrm1         | NM_019822.1 | Mus musculus adhesion regulating molecule 1 (Adrm1) mRNA                                                |
| scf000176.1.12-S      | 0.93                | 0.95              | 1.03               | 0.88                  | 1.30                | 1.31                 | -0.06               | 0.45              | 0.36               | Psmat1        | NM_011965   | Mus musculus proteasome (prosome macropain) subunit alpha type 1 (Psmat1) mRNA                          |
| scf37349.4.286.5-S    | 0.83                | 1.05              | 0.88               | 0.73                  | 1.47                | 1.33                 | -0.18               | 0.68              | 0.36               | Suv5          | NM_173733.2 | Mus musculus suflifer protein 5 (Suv5) mRNA                                                             |
| scf0086973.1.60-S     | 0.86                | 1.03              | 0.99               | 0.82                  | 1.36                | 1.25                 | -0.07               | 0.39              | 0.35               | Mps18b        | NM_020671.2 | Mus musculus mitochondrial ribosomal protein S18B (Mps18b) mRNA                                         |
| scf0002087.1.19-S     | 0.68                | 0.91              | 1.08               | 0.62                  | 1.53                | 1.40                 | -0.14               | 0.77              | 0.35               | BC037135      | NM_173763.2 | Mus musculus cDNA sequence BC037135 (BC037135) mRNA                                                     |
| scf014287.1.4-S       | 0.92                | 0.86              | 1.16               | 0.77                  | 1.45                | 1.47                 | -0.26               | 0.75              | 0.35               | Fpps          | NM_010236   | Mus musculus foxy polyglutamylyl synthetase (Fpps) mRNA                                                 |
| scf25041.1.49.5-S     | 0.91                | 0.97              | 1.01               | 0.83                  | 1.40                | 1.29                 | -0.14               | 0.52              | 0.35               | Elovl1        | NM_019422.1 | Mus musculus elongation of very long chain fatty acids (FEN1/Elo2 SUR4/Elo3 yeast-like 1 (Elovl1) mRNA  |
| scf24346.2.118-S      | 0.99                | 0.95              | 1.02               | 0.78                  | 1.64                | 1.29                 | -0.34               | 0.78              | 0.34               | Alp2          | NM_019998   | Mus musculus asparagine-linked glycosylation 2 homolog (yeast alpha-13-mannosyltransferase) (Alp2) mRNA |
| scf0067862.2.51-S     | 0.93                | 1.04              | 0.89               | 0.93                  | 1.32                | 1.13                 | -0.01               | 0.34              | 0.34               | 5430428G01Rik | NM_024178.1 | Mus musculus RIKEN cDNA 5430428G01 gene (5430428G01Rik) mRNA                                            |
| scf0003086.1.135-S    | 1.20                | 0.76              | 0.89               | 0.76                  | 1.30                | 0.90                 | -0.76               | 0.12              | 0.34               | 5430428G01Rik | NM_024178.1 | Mus musculus RIKEN cDNA 5430428G01 gene (5430428G01Rik) mRNA                                            |
| scf0001179.1.28-S     | 1.12                | 0.94              | 0.84               | 1.00                  | 1.31                | 1.07                 | -0.17               | 0.47              | 0.34               | A03007L17Rik  | NM_02637.2  | Mus musculus RIKEN cDNA A03007L17 gene (A03007L17Rik) mRNA                                              |
| scf49146.12.1.4-S     | 0.96                | 0.98              | 1.01               | 0.79                  | 1.78                | 1.28                 | -0.27               | 0.82              | 0.34               | 2610033C09Rik | NM_026407.2 | Mus musculus RIKEN cDNA 2610033C09 gene (2610033C09Rik) mRNA                                            |
| scf0003245.1.6-S      | 0.95                | 0.91              | 1.05               | 0.89                  | 1.24                | 1.32                 | -0.08               | 0.44              | 0.34               | Snapp23       | NM_009222.2 | Mus musculus synaptonemal-associated protein 23 (Snapp23) mRNA                                          |
| scf35515.3.6-S        | 1.16                | 0.88              | 0.84               | 1.03                  | 1.31                | 1.07                 | -0.17               | 0.58              | 0.34               | 1200002G13Rik | NM_025360.1 | Mus musculus RIKEN cDNA 1200002G13 gene (1200002G13Rik) mRNA                                            |
| scf00002782.1.72-S    | 1.00                | 0.90              | 0.94               | 0.93                  | 1.44                | 1.18                 | -0.10               | 0.66              | 0.33               | Elovl1        | NM_019422   | Mus musculus elongation of very long chain fatty acids (FEN1/Elo2 SUR4/Elo3 yeast-like 1 (Elovl1) mRNA  |
| scf00217869.1.91-S    | 0.67                | 1.00              | 1.02               | 0.63                  | 1.33                | 1.29                 | -0.10               | 0.47              | 0.33               | Eif5          | NM_173363.2 | Mus musculus eukaryotic translation initiation factor 5 (Eif5) mRNA                                     |
| scf22990515.25.25-S   | 0.85                | 0.90              | 0.98               | 0.74                  | 1.47                | 1.23                 | -0.20               | 0.74              | 0.33               | BC037135      | NM_173763.2 | Mus musculus cDNA sequence BC037135 (BC037135) mRNA                                                     |
| scf28851.8.90-S       | 0.76                | 1.24              | 0.94               | 0.72                  | 1.09                | 1.18                 | -0.07               | 0.18              | 0.33               | Kcmf1         | NM_019715.1 | Mus musculus potassium channel modulatory factor 1 (Kcmf1) mRNA                                         |
| scf27879.8.321.13-S   | 0.89                | 0.99              | 1.00               | 0.92                  | 1.29                | 1.25                 | 0.05                | 0.38              | 0.33               | Stx18         | NM_026959.1 | Mus musculus syntaxin 18 (Stx18) mRNA                                                                   |
| scf42371.18.1.30-S    | 0.52                | 1.00              | 1.00               | 0.40                  | 1.25                | 1.26                 | -0.37               | 0.31              | 0.33               | Pylg          | NM_133198.1 | Mus musculus liver glycogen phosphorylase (Pylg) mRNA                                                   |
| scf24262.3.152-S      | 1.04                | 0.66              | 0.91               | 0.90                  | 1.52                | 1.12                 | -0.21               | 1.19              | 0.33               | Hdh3d3        | NM_024257.1 | Mus musculus RIKEN cDNA 2610007K22 gene (2610007K22Rik) transcript variant 1 mRNA                       |
| scf46959.14.72-S      | 0.93                | 0.99              | 0.95               | 0.84                  | 1.49                | 1.19                 | -0.15               | 0.58              | 0.32               | 2610007K22Rik | NM_199080.1 | Mus musculus RIKEN cDNA 2610007K22 gene (2610007K22Rik) transcript variant 1 mRNA                       |
| scf00214895.1.58-S    | 0.92                | 1.02              | 1.01               | 0.81                  | 1.20                | 1.26                 | -0.20               | 0.23              | 0.32               | Lman2l        | XM_129848.4 | Mus musculus lectin mannose-binding 2-like (Lman2l) mRNA                                                |
| scf269523.2.3-S       | 0.79                | 1.05              | 0.95               | 0.67                  | 1.16                | 1.18                 | -0.24               | 0.14              | 0.32               | Vbp           | NM_009503.2 | Mus musculus valsin containing protein (Vbp) mRNA                                                       |
| scf39445.1.46.133-S   | 0.79                | 1.22              | 1.09               | 0.69                  | 1.27                | 1.12                 | -0.22               | 0.45              | 0.32               | Tax2          | XM_20370.2  | Mus musculus testis expressed protein 2 (Tax2) mRNA                                                     |
| scf000196.1.9-S       | 0.94                | 0.92              | 1.02               | 0.77                  | 1.11                | 1.27                 | -0.29               | 0.28              | 0.32               | Actn4         | NM_021895.2 |                                                                                                         |

| Gene Name           | Control<br>18 Hours | Control<br>1 Week | Control<br>4 Weeks | Treatment<br>18 Hours | Treatment<br>1 Week | Treatment<br>4 Weeks | Log2 FC<br>18 Hours | Log2 FC<br>1 Week | Log2 FC<br>4 Weeks | Symbol        | Accession   | Definition                                                                                                                    |
|---------------------|---------------------|-------------------|--------------------|-----------------------|---------------------|----------------------|---------------------|-------------------|--------------------|---------------|-------------|-------------------------------------------------------------------------------------------------------------------------------|
| scd0012192.2_103-S  | 0.95                | 1.01              | 1.10               | 0.77                  | 1.10                | 1.32                 | -0.31               | 0.12              | 0.29               | Zfp361f       | NM_007564.2 | Mus musculus zinc finger protein 36 C3H type-like 1 (Zfp361f) mRNA.                                                           |
| scd0020924.2_9-S    | 0.95                | 1.05              | 0.94               | 0.82                  | 1.30                | 1.15                 | -0.21               | 0.30              | 0.28               | Sup5h         | NM_013676.1 | Mus musculus suppressor of Ty 5 homolog (S. cerevisiae) (Sup5h) mRNA.                                                         |
| scd0001591.1_7-S    | 0.86                | 0.97              | 1.11               | 0.71                  | 1.36                | 1.35                 | -0.29               | 0.48              | 0.28               | Hnrh1f        | NM_021510.1 | Mus musculus heterogeneous nuclear ribonucleoprotein H1 (Hnrh1f) mRNA.                                                        |
| scd0106121.3_5-S    | 0.92                | 0.96              | 1.06               | 0.82                  | 1.44                | 1.29                 | -0.16               | 0.59              | 0.28               | Uzaf1f        | NM_028487.1 | Mus musculus U2 small nuclear ribonucleoprotein auxiliary factor (Uzaf1f) mRNA.                                               |
| scd0382059.6_30-S   | 0.70                | 0.88              | 1.13               | 0.83                  | 1.13                | 1.23                 | -0.39               | 0.33              | 0.29               | E63f1         | XM_368126.2 |                                                                                                                               |
| scd0001637.7_219-S  | 0.51                | 1.05              | 1.02               | 0.75                  | 1.41                | 1.23                 | -0.10               | 0.42              | 0.28               | Luc7f         | NM_025881.1 | Mus musculus Luc7 homolog (S. cerevisiae)-like (Luc7f) mRNA.                                                                  |
| scd067976.11_22-S   | 0.92                | 0.94              | 0.96               | 1.02                  | 1.11                | 1.16                 | 0.14                | 0.24              | 0.28               | 5730502D15Rik | NM_026485.1 | Mus musculus RIKEN cDNA 5730502D15 gene (5730502D15Rik) mRNA.                                                                 |
| scd027222.1_216-S   | 1.06                | 1.01              | 0.96               | 0.94                  | 1.44                | 1.16                 | -0.16               | 0.51              | 0.28               | 2810405J04Rik | NM_133747.1 | Mus musculus RIKEN cDNA 2810405J04 gene (2810405J04Rik) mRNA.                                                                 |
| scd26144.4_263-S    | 1.10                | 0.83              | 0.85               | 0.98                  | 1.19                | 1.04                 | -0.15               | 0.51              | 0.28               | Hspb8         | NM_030704.1 | Mus musculus heat shock 27kDa protein 8 (Hspb8) mRNA.                                                                         |
| scd21778.5_425-S    | 0.69                | 0.73              | 1.16               | 0.34                  | 1.49                | 1.40                 | -1.05               | 1.09              | 0.28               | Hsd3b5        | NM_008295.1 | Mus musculus hydroxysteroid dehydrogenase 5 delta-5-3-beta (Hsd3b5) mRNA.                                                     |
| scd30867.1106_97-S  | 0.69                | 1.04              | 0.97               | 0.55                  | 1.21                | 1.18                 | -0.31               | 0.21              | 0.28               | Prkcdp        | NM_028444.1 | Mus musculus protein kinase C delta binding protein (Prkcdp) mRNA.                                                            |
| scd014661.15_41-S   | 0.83                | 1.13              | 1.07               | 0.83                  | 1.11                | 1.23                 | -0.39               | 0.33              | 0.28               | Stat1f        | NM_021448.1 | Mus musculus signal transducer 1b ERATO of transcription interacting protein 1 (Stat1f) mRNA.                                 |
| scd0002491.1_21-S   | 1.01                | 0.98              | 0.95               | 0.96                  | 1.18                | 1.15                 | -0.07               | 0.26              | 0.28               | Siat4a        | NM_009177.2 | Mus musculus sialyltransferase 4a (beta-galactoside alpha-23 sialyltransferase) (Siat4a) mRNA.                                |
| scd0003092.1_40-S   | 0.85                | 0.96              | 1.05               | 0.83                  | 1.26                | 1.27                 | -0.03               | 0.38              | 0.28               |               | AF411517.1  | Mus musculus mitotic phosphoprotein 44 mRNA complete cds.                                                                     |
| scd0014228.2_173-S  | 0.57                | 1.06              | 1.11               | 0.49                  | 1.58                | 1.33                 | -0.21               | 0.57              | 0.28               | Fkbp4         | NM_010219.2 | Mus musculus FK506 binding protein 4 (Fkbp4) mRNA.                                                                            |
| scd40648.1_563-S    | 0.72                | 0.99              | 1.06               | 0.68                  | 1.56                | 1.28                 | -0.07               | 0.68              | 0.28               | Cip1f         | NM_138753.1 | Mus musculus cardiac lineage protein 1 (Cip1f) mRNA.                                                                          |
| scd067738.10_4-S    | 0.67                | 1.04              | 1.01               | 0.57                  | 1.46                | 1.21                 | -0.23               | 0.50              | 0.27               | Ppid          | NM_026352.2 | Mus musculus peptidylprolyl isomerase D (cyclophilin D) (Ppid) mRNA.                                                          |
| scd37039.1_85-S     | 0.89                | 0.97              | 1.00               | 0.89                  | 1.46                | 1.21                 | 0.00                | 0.59              | 0.27               | H2afx         | NM_010436.2 | Mus musculus H2A histone family member X (H2afx) mRNA.                                                                        |
| scd0002289.1_15-S   | 0.90                | 0.95              | 1.03               | 0.83                  | 1.08                | 1.29                 | -0.11               | 0.19              | 0.27               | Stat1p        | NM_021448.1 | Mus musculus signal transducer 1b ERATO of transcription interacting protein 1 (Stat1p) mRNA.                                 |
| scd40540.3_48-S     | 0.97                | 0.89              | 1.04               | 1.06                  | 1.10                | 1.25                 | 0.16                | 0.29              | 0.27               | 1110014L17Rik | NM_134020.1 | Mus musculus RIKEN cDNA 1110014L17 gene (1110014L17Rik) mRNA.                                                                 |
| scd41608.24.1_99-S  | 0.97                | 1.25              | 0.90               | 0.82                  | 1.07                | 1.09                 | -0.24               | -0.23             | 0.27               | Adamts2       | NM_175643.1 | Mus musculus a disintegrin-like and metalloprotease (repolysin type) with thrombospondin type 1 motif 2 (Adamts2) mRNA.       |
| scd00224530.2_232-S | 0.87                | 0.92              | 1.05               | 0.81                  | 1.28                | 1.26                 | -0.09               | 0.48              | 0.27               | Acat3f        | NM_153151   | Mus musculus acetyl-Coenzyme A acetyltransferase 3 (Acat3f) mRNA.                                                             |
| scd012558.4_4-S     | 0.90                | 0.97              | 1.10               | 0.72                  | 1.19                | 1.32                 | -0.33               | 0.29              | 0.27               | Cdh2          | NM_007664.1 | Mus musculus cadherin 2 (Cdh2) mRNA.                                                                                          |
| scd17449.2_22-S     | 0.90                | 0.91              | 1.04               | 0.88                  | 1.15                | 1.25                 | -0.03               | 0.33              | 0.27               | Rab1f         | NM_145510.1 |                                                                                                                               |
| scd36442.5.5_16-S   | 0.93                | 1.01              | 0.91               | 0.92                  | 1.46                | 1.09                 | -0.02               | 0.53              | 0.27               | Nme6f         | NM_018757.1 | Mus musculus expressed in non-metastatic cells 6 protein (Nme6f) mRNA.                                                        |
| scd05814.32.1_1-S   | 1.03                | 0.99              | 0.94               | 0.93                  | 1.30                | 1.13                 | -0.31               | 0.38              | 0.27               | Crbt1f        | NM_021406.2 | Mus musculus cAMP responsive element binding protein-like 1 (Crbt1f) mRNA.                                                    |
| scd027407.6_4-S     | 0.90                | 1.07              | 1.03               | 0.83                  | 1.24                | 1.18                 | -0.11               | 0.38              | 0.27               | Acet2f        | NM_013693.1 | Mus musculus ATP-binding cassette sub-family F (CGA20) member 2 (Acet2f) mRNA.                                                |
| scd0016151.2_209-S  | 1.06                | 0.92              | 0.91               | 0.98                  | 1.27                | 1.09                 | -0.11               | 0.47              | 0.26               | Ikbkg         | NM_010547.1 | Mus musculus inhibitor of kappaB kinase gamma (Ikbkg) mRNA.                                                                   |
| scd0032086.1_195-S  | 0.84                | 1.11              | 0.99               | 0.69                  | 1.16                | 1.19                 | -0.29               | 0.07              | 0.26               | A930009M04Rik | NM_177266.3 | Mus musculus RIKEN cDNA A930009M04 gene (A930009M04Rik) mRNA.                                                                 |
| scd05073.12_278-S   | 0.98                | 1.01              | 0.99               | 0.84                  | 1.18                | 1.18                 | -0.23               | 0.22              | 0.26               | Tcf3f         | NM_172472.1 | Mus musculus transcription factor E3 (Tcf3f) mRNA.                                                                            |
| scd0064934.1_269-S  | 1.49                | 0.79              | 0.75               | 1.26                  | 1.08                | 0.90                 | -0.24               | 0.45              | 0.26               | Pes1f         | NM_022889.2 | Mus musculus pescadillo homolog 1 containing BRCT domain (zebrafish) (Pes1f) mRNA.                                            |
| scd24455.4.1_56-S   | 0.88                | 1.06              | 0.95               | 0.77                  | 1.17                | 1.13                 | -0.18               | 0.14              | 0.25               | Mobk12b       | NM_178061.3 | Mus musculus MOB1 Mps One Binder kinase activator-like 2B (yeast) (Mobk12b) mRNA.                                             |
| scd0023451.1_30-S   | 0.86                | 1.03              | 0.95               | 0.80                  | 1.29                | 1.28                 | -0.10               | 0.44              | 0.25               | 5730502D15Rik | NM_026485.1 | Mus musculus RIKEN cDNA 5730502D15 gene (5730502D15Rik) mRNA.                                                                 |
| scd0100.10_22-S     | 0.89                | 1.02              | 0.95               | 0.80                  | 1.29                | 1.28                 | -0.10               | 0.44              | 0.25               | 5730502D15Rik | NM_026485.1 | Mus musculus RIKEN cDNA 5730502D15 gene (5730502D15Rik) mRNA.                                                                 |
| scd27250.2_266-S    | 0.87                | 1.02              | 0.95               | 0.89                  | 1.26                | 1.12                 | 0.02                | 0.30              | 0.25               | D730049H07Rik | NM_175423   | Mus musculus RIKEN cDNA D730049H07 gene (D730049H07Rik) mRNA.                                                                 |
| scd00224023.1_141-S | 0.87                | 1.08              | 0.96               | 0.72                  | 1.10                | 1.15                 | -0.26               | 0.01              | 0.25               | 261031818Rik  | NM_145479   | Mus musculus RIKEN cDNA 261031818 gene (261031818Rik) mRNA.                                                                   |
| scd0077038.2_31-S   | 0.96                | 0.95              | 0.99               | 0.88                  | 1.20                | 1.18                 | -0.13               | 0.35              | 0.25               | Zfp289        | NM_023854.1 | Mus musculus zinc finger protein 289 (Zfp289) mRNA.                                                                           |
| scd0029876.1_93-S   | 0.96                | 0.92              | 1.02               | 0.89                  | 1.37                | 1.21                 | -0.10               | 0.56              | 0.25               | Clic4f        | XM_124389.1 | Mus musculus chloride intracellular channel 4 (mitochondrial) (Clic4f) mRNA.                                                  |
| scd00236794.2_11-S  | 1.07                | 1.02              | 0.84               | 1.06                  | 1.03                | 1.00                 | -0.02               | 0.02              | 0.25               | Sic9a6        | NM_172780.1 | Mus musculus solute carrier family 9 (sodium/hydrogen exchanger) isoform 6 (Sic9a6) mRNA.                                     |
| scd0015381.1_237-S  | 0.94                | 0.96              | 1.00               | 0.83                  | 1.24                | 1.18                 | -0.17               | 0.38              | 0.24               | Hrrcp         | NM_016886.1 | Mus musculus heterogeneous nuclear ribonucleoprotein C (Hrrcp) mRNA.                                                          |
| scd067605.5_228-S   | 0.90                | 1.01              | 0.99               | 0.84                  | 1.11                | 1.23                 | -0.11               | 0.38              | 0.24               | Act1f         | NM_024270.1 | Mus musculus ACT1 substrate 1 (protein-act) (Act1f) mRNA.                                                                     |
| scd41104.6.1_30-S   | 0.71                | 0.96              | 1.04               | 0.66                  | 1.24                | 1.23                 | -0.11               | 0.37              | 0.24               | 130001406Rik  | NM_025837.2 | Mus musculus RIKEN cDNA 130001406 gene (130001406Rik) mRNA.                                                                   |
| scd067500.2_43-S    | 0.96                | 1.04              | 0.96               | 0.70                  | 1.33                | 1.14                 | -0.45               | 0.34              | 0.24               | Ccar1         | NM_026201.1 | Mus musculus cell division cycle and apoptosis regulator 1 (Ccar1) mRNA.                                                      |
| scd067078.2_14-S    | 0.99                | 1.01              | 0.97               | 0.97                  | 1.32                | 1.14                 | -0.03               | 0.38              | 0.24               | 1700012G19Rik | NM_025954.2 | Mus musculus RIKEN cDNA 1700012G19 gene (1700012G19Rik) mRNA.                                                                 |
| scd066229.1_118-S   | 0.92                | 0.97              | 0.99               | 0.81                  | 1.31                | 1.17                 | -0.17               | 0.44              | 0.24               | 1500016H10Rik | NM_025433.2 | Mus musculus RIKEN cDNA 1500016H10 gene (1500016H10Rik) mRNA.                                                                 |
| scd39096.7.1_9-S    | 0.86                | 0.98              | 1.10               | 0.79                  | 1.18                | 1.29                 | -0.12               | 0.28              | 0.24               | Aldha8a       | NM_178713.1 | Mus musculus aldehyde dehydrogenase 8 family member A1 (Aldha8a) mRNA.                                                        |
| scd0003709.1_47-S   | 0.97                | 1.03              | 0.96               | 0.88                  | 1.16                | 1.12                 | -0.14               | 0.17              | 0.23               | Tbctd7        | NM_025955.1 | Mus musculus TBCT domain family member 7 (Tbctd7) mRNA.                                                                       |
| scd056351.1_126-S   | 0.89                | 1.02              | 0.99               | 0.81                  | 1.20                | 1.15                 | -0.12               | 0.20              | 0.23               | Tbctd7        | NM_025955.1 | Mus musculus TBCT domain family member 7 (Tbctd7) mRNA.                                                                       |
| scd0326818.9_77-S   | 0.98                | 0.95              | 0.84               | 1.04                  | 1.08                | 0.99                 | 0.08                | 0.16              | 0.23               | Tgm4f         | XM_134274.3 | Mus musculus telomerase binding protein p23 (Tgm4f) mRNA.                                                                     |
| scd000455.1_29-S    | 0.97                | 1.04              | 0.95               | 0.93                  | 1.16                | 1.12                 | -0.06               | 0.15              | 0.23               | Mrp49         | NM_026246.1 | Mus musculus mitochondrial ribosomal protein L49 (Mrp49) mRNA.                                                                |
| scd32830.4_10-S     | 0.95                | 1.01              | 0.96               | 0.84                  | 1.25                | 1.13                 | -0.18               | 0.31              | 0.23               | B23031218Rik  | NM_172740.1 | Mus musculus RIKEN cDNA B23031218 gene (B23031218Rik) mRNA.                                                                   |
| scd40548.11_295-S   | 0.62                | 0.51              | 1.26               | 0.41                  | 2.81                | 1.46                 | -0.38               | 2.47              | 0.23               | Gck           | NM_010292.3 | Mus musculus glucokinase (Gck) mRNA.                                                                                          |
| scd0001574.1_5-S    | 0.90                | 0.92              | 1.11               | 0.89                  | 1.42                | 1.31                 | -0.02               | 0.62              | 0.23               | G3bp          | NM_013716.1 | Mus musculus Ras-GTPase-activating protein SH3-domain binding protein (G3bp) mRNA.                                            |
| scd46370.4_89-S     | 0.92                | 0.92              | 1.02               | 0.82                  | 1.18                | 1.20                 | -0.15               | 0.36              | 0.23               | Apea1f        | NM_009887   | Mus musculus apurinic/apyrimidinic endonuclease 1 (Apea1f) mRNA.                                                              |
| scd00108673.2_110-S | 0.87                | 1.00              | 0.93               | 0.82                  | 1.10                | 1.10                 | -0.18               | 0.54              | 0.22               | 106rdb78e     | XM_134274.3 | Mus musculus DNA segment 19 ERATO Doi 678 expressed (D19Erdb78e) mRNA.                                                        |
| scd26001.12_181-S   | 0.97                | 1.10              | 1.01               | 0.82                  | 1.14                | 1.16                 | -0.26               | 0.05              | 0.23               | Epmf          | NM_007941.1 | Mus musculus epimorphin (Epmf) mRNA.                                                                                          |
| scd25472.6.1_2-S    | 0.91                | 0.95              | 1.00               | 0.89                  | 1.19                | 1.17                 | -0.02               | 0.33              | 0.23               | AA959934      | NM_153167.1 | Mus musculus expressed sequence AA959934 (AA959934) mRNA.                                                                     |
| scd0021915.2_168-S  | 1.06                | 0.88              | 0.81               | 1.00                  | 1.06                | 0.94                 | -0.08               | 0.28              | 0.23               | Dtymk         | NM_023136.1 | Mus musculus deoxythymidylate kinase (Dtymk) mRNA.                                                                            |
| scd23766.9_174-S    | 1.00                | 0.95              | 0.97               | 0.94                  | 1.37                | 1.14                 | -0.09               | 0.51              | 0.23               | Tnln          | XM_131709.5 |                                                                                                                               |
| scd022245.8_1-S     | 0.82                | 0.95              | 1.09               | 0.82                  | 1.29                | 1.27                 | -0.01               | 0.44              | 0.22               | Uck1f         | NM_011675.1 |                                                                                                                               |
| scd23938.4.1_17-S   | 0.96                | 1.06              | 0.99               | 0.83                  | 1.25                | 1.03                 | -0.21               | 0.23              | 0.22               | Dph22         | NM_026344.2 | Mus musculus diphtheria toxin resistance protein required for diphtheramide biosynthesis (Saccharomyces)-like 2 (Dph22) mRNA. |
| scd49873.9_8-S      | 1.00                | 0.94              | 0.96               | 0.83                  | 1.26                | 1.18                 | -0.12               | 0.38              | 0.22               | Uck1f         | NM_026344.2 | Mus musculus diphtheria toxin resistance protein required for diphtheramide biosynthesis (Saccharomyces)-like 2 (Dph22) mRNA. |
| scd0001505.1_4-S    | 0.94                | 0.90              | 1.02               | 0.70                  | 1.26                | 1.15                 | -0.24               | 0.47              | 0.22               | Acot1f        | NM_015725.1 | Mus musculus acyl-Coenzyme A oxidase 1 palmitoyl (Acot1f) mRNA.                                                               |
| scd0214895.1_30-S   | 0.98                | 1.04              | 0.99               | 0.79                  | 1.15                | 1.14                 | -0.32               | 0.14              | 0.22               | Lman2f        | XM_129848.4 | Mus musculus lectin mannose-binding 2-like (Lman2f) mRNA.                                                                     |
| scd39292.4_16-S     | 0.86                | 1.06              | 0.95               | 0.81                  | 1.38                | 1.11                 | -0.09               | 0.38              | 0.22               | Ptdsr         | NM_033398.1 | Mus musculus phosphatidylserine receptor (Ptdsr) mRNA.                                                                        |
| scd0003589.1_16-S   | 0.96                | 1.06              | 0.91               | 1.00                  | 1.51                | 1.06                 | 0.05                | 0.49              | 0.22               | Nme6f         | NM_018757.1 | Mus musculus expressed in non-metastatic cells 6 protein (Nme6f) mRNA.                                                        |
| scd000657.1_20-S    | 0.81                | 0.93              | 1.07               | 0.84                  | 1.22                | 1.25                 | 0.05                | 0.39              | 0.22               | Mps31         | NM_020560.1 | Mus musculus mitochondrial ribosomal protein S31 (Mps31) mRNA.                                                                |
| scd0022647.1_28-S   | 0.81                | 1.10              | 0.95               | 0.69                  | 1.10                | 1.10                 | -0.23               | 0.01              | 0.22               | Zfp106        | NM_011743.1 | Mus musculus zinc finger protein 106 (Zfp106) mRNA.                                                                           |
| scd4988.17.1_42-S   | 0.99                | 0.98              | 0.94               | 0.87                  | 1.39                | 1.10                 | -0.18               | 0.54              | 0.22               | Sf3a3f        | NM_029157.2 | Mus musculus splicing factor 3a subunit 3 (Sf3a3f) mRNA.                                                                      |
| scd012847.15_153-S  | 0.88                | 1.08              | 0.97               | 0.69                  | 1.20                | 1.12                 | -0.35               | 0.15              | 0.22               | Copa          | NM_00938.2  | Mus musculus coatomer protein complex subunit alpha (Copa) mRNA.                                                              |
| scd49771.23.1_24-S  | 0.91                | 0.87              | 1.04               | 0.81                  | 1.24                | 1.21                 | -0.17               | 0.50              | 0.22               | Dpp9f         | NM_172624.1 | Mus musculus dipeptidylpeptidase 9 (Dpp9f) mRNA.                                                                              |
| scd0012763.1_321-S  | 0.92                | 0.97              | 1.10               | 0.73                  | 1.16                | 1.28                 | -0.34               | 0.26              | 0.22               | Cmah          | NM_007717.1 | Mus musculus cytidine monophospho-N-acetylneuraminic acid hydroxylase (Cmah) mRNA.                                            |
| scd0013909.2_193-S  | 0.81                | 0.91              | 1.08               | 0.55                  | 1.10                | 1.25                 | -0.56               | 0.30              | 0.22               | LOC13909      | NM_144511.1 | Mus musculus esterase 31-like (LOC13909) mRNA.                                                                                |
| scd0107071.9_36-S   | 0.87                | 0.95              | 0.96               | 0.80                  | 1.32                | 1.14                 | -0.11               | 0.47              | 0.21               | 5730436H21Rik | NM_134139.1 | Mus musculus RIKEN cDNA 5730436H21 gene (5730436H21Rik) mRNA.                                                                 |
| scd068050.2_0-S     | 0.97                | 0.93              | 0.94               | 0.88                  | 1.27                | 1.09                 | -0.14               | 0.46              | 0.21               | 6330407G11Rik | XM_124343.1 | Mus musculus RIKEN cDNA 6330407G11 gene (6330407G11Rik) mRNA.                                                                 |
| scd45422.4_429-S    | 0.73                | 0.97              | 1.13               | 0.49                  | 1.14                | 1.20                 | -0.52               | 0.02              | 0.21               | 1300012D20Rik | NM_025811.1 | Mus musculus RIKEN cDNA 1300012D20 gene (1300012D20Rik) mRNA.                                                                 |
| scd49354.14_64-S    | 0.86                | 0.97              | 1.09               | 0.82                  | 1.12                | 1.11                 | -0.12               | 0.21              | 0.21               | Ugfi1f        | NM_021721.1 | Mus musculus ubiquitin ligase degradation 1 like (Ugfi1f) mRNA.                                                               |
| scd0003775.1_106-S  | 0.67                | 0.85              | 1.10               | 0.57                  | 1.1                 |                      |                     |                   |                    |               |             |                                                                                                                               |

| Gene Name           | Control<br>18 Hours | Control<br>1 Week | Control<br>4 Weeks | Treatment<br>18 Hours | Treatment<br>1 Week | Treatment<br>4 Weeks | Log2 FC<br>18 Hours | Log2 FC<br>1 Week | Log2 FC<br>4 Weeks | Symbol        | Accession                                                                         | Definition                                                                                                              |
|---------------------|---------------------|-------------------|--------------------|-----------------------|---------------------|----------------------|---------------------|-------------------|--------------------|---------------|-----------------------------------------------------------------------------------|-------------------------------------------------------------------------------------------------------------------------|
| scf020341.12 22-S   | 0.68                | 0.98              | 1.12               | 0.44                  | 1.02                | 1.28                 | -0.60               | 0.11              | 0.19               | Selenbp1      | NM_009150.2                                                                       | Mus musculus selenium binding protein 1 (Selenbp1) mRNA.                                                                |
| scf000534.1 21-S    | 0.75                | 0.97              | 0.96               | 0.72                  | 1.21                | 1.09                 | -0.04               | 0.32              | 0.19               | Pppt1ca       | NM_031868.1                                                                       | Mus musculus protein phosphatase 1 catalytic subunit alpha isoform (Pppt1ca) mRNA.                                      |
| scf022245.1 319-S   | 0.89                | 0.97              | 1.01               | 0.84                  | 1.38                | 1.15                 | -0.08               | 0.51              | 0.19               | Uck1          | NM_011675.1                                                                       | Mus musculus Uck1                                                                                                       |
| scf26742.121 68-S   | 1.00                | 1.04              | 0.99               | 0.89                  | 1.49                | 1.13                 | -0.18               | 0.52              | 0.19               | Eif2b4        | NM_010122.1                                                                       | Mus musculus eukaryotic translation initiation factor 2B subunit 4 delta (Eif2b4) mRNA.                                 |
| scf021673.2 51-S    | 0.93                | 0.96              | 0.99               | 0.92                  | 1.27                | 1.13                 | -0.38               | 0.33              | 0.19               | Trpc2         | NM_011593.1                                                                       | Mus musculus transient receptor potential 2 (Trpc2) mRNA.                                                               |
| scf0140792.13 120-S | 1.14                | 0.82              | 0.97               | 0.97                  | 0.93                | 1.10                 | 0.22                | 0.17              | 0.19               | Colec12       | NM_130449.1                                                                       | Mus musculus coiled coil subfamily member 12 (Colec12) mRNA.                                                            |
| scf000624.1 18-S    | 0.93                | 0.89              | 1.01               | 0.97                  | 1.06                | 1.15                 | 0.07                | 0.26              | 0.19               | Asah1         | NM_019734.1                                                                       | Mus musculus N-acylsphingosine amidohydrolase 1 (Asah1) mRNA.                                                           |
| scf018221.7 88-S    | 0.86                | 1.06              | 0.93               | 0.77                  | 1.28                | 1.06                 | -0.14               | 0.27              | 0.19               | Nudc          | NM_010948.1                                                                       | Mus musculus nuclear distribution gene C homolog (Aspergillus) (Nudc) mRNA.                                             |
| scf066163.7 0-S     | 0.72                | 1.00              | 1.11               | 0.69                  | 1.22                | 1.25                 | -0.07               | 0.30              | 0.19               | Mrp4          | NM_023167.1                                                                       | Mus musculus mitochondrial ribosomal protein L4 (Mrp4) mRNA.                                                            |
| scf067180.1 177-S   | 1.50                | 0.93              | 0.75               | 1.19                  | 1.01                | 0.85                 | -0.33               | 0.14              | 0.19               | 2610311119Rik | NM_023311.2                                                                       | Mus musculus RIKEN cDNA 2610311119 gene (2610311119Rik) mRNA.                                                           |
| scf28749.2 254 68-S | 0.81                | 0.98              | 1.03               | 0.69                  | 1.29                | 1.17                 | -0.23               | 0.39              | 0.19               | Pcbp1         | NM_011865.2                                                                       | Mus musculus poly(rC) binding protein 1 (Pcbp1) mRNA.                                                                   |
| scf01281.38 96-S    | 0.72                | 0.96              | 1.05               | 0.75                  | 1.21                | 1.13                 | -0.38               | 0.33              | 0.19               | 213000101Rik  | NM_011593.1                                                                       | Mus musculus RIKEN cDNA 213000101 gene (213000101Rik) mRNA.                                                             |
| scf40257.9 25-S     | 0.99                | 0.95              | 1.00               | 0.92                  | 1.18                | 1.13                 | -0.09               | 0.31              | 0.19               | 0610039K22Rik | NM_025346.1                                                                       | Mus musculus RIKEN cDNA 0610039K22 gene (0610039K22Rik) mRNA.                                                           |
| scf4442.9.1 77-S    | 0.84                | 1.04              | 1.00               | 0.73                  | 1.25                | 1.13                 | -0.20               | 0.28              | 0.19               | Pgpb1         | NM_019478.2                                                                       | Mus musculus polyglutamine binding protein 1 (Pgpb1) mRNA.                                                              |
| scf23840.4 11-S     | 0.84                | 1.03              | 1.00               | 0.84                  | 1.28                | 1.13                 | 0.00                | 0.31              | 0.18               | 2700082D03Rik | NM_026031.1                                                                       | Mus musculus RIKEN cDNA 2700082D03 gene (2700082D03Rik) mRNA.                                                           |
| scf050503.16.1 7-S  | 0.92                | 1.09              | 0.90               | 0.80                  | 1.05                | 1.02                 | -0.21               | -0.05             | 0.18               | Spg4          | NM_016962                                                                         | Mus musculus spastic paraplegia 4 homolog (human) (Spg4) mRNA.                                                          |
| scf33266.7.1 26-S   | 0.87                | 0.95              | 1.02               | 0.62                  | 1.52                | 1.15                 | -0.48               | 0.72              | 0.18               | Hsd17b2       | NM_008290.1                                                                       | Mus musculus hydroxysteroid (17-beta) dehydrogenase 2 (Hsd17b2) mRNA.                                                   |
| scf25931.11.1 56-S  | 0.76                | 1.06              | 0.97               | 0.67                  | 1.34                | 1.10                 | -0.19               | 0.33              | 0.17               | Wbsc22        | NM_025375.1                                                                       | Mus musculus Williams Beuren syndrome chromosome region 22 (Wbsc22) mRNA.                                               |
| scf0030311.1 11-S   | 0.86                | 0.89              | 1.14               | 0.76                  | 1.46                | 1.28                 | -0.48               | 0.70              | 0.17               | Aga2l2        | NM_026212.1                                                                       | Mus musculus 1-acylglycerol-3-phosphate O-acyltransferase 2 (lysophosphalidic acid acyltransferase beta) (Aga2l2) mRNA. |
| scf0202747.2 286-S  | 0.94                | 1.02              | 1.02               | 0.90                  | 1.05                | 1.14                 | -0.23               | 0.04              | 0.17               | Soop          | NM_025287.1                                                                       | Mus musculus speckle-type POZ protein (Soop) mRNA.                                                                      |
| scf0201035.1 78-S   | 0.85                | 1.06              | 0.99               | 0.67                  | 1.21                | 1.11                 | -0.33               | 0.18              | 0.17               | Zfp180        | NM_172483.1                                                                       | Mus musculus zinc finger protein 180 (Zfp180) mRNA.                                                                     |
| scf0015925.2 2-S    | 0.90                | 1.01              | 0.98               | 0.71                  | 1.16                | 1.11                 | -0.35               | 0.18              | 0.17               | Ide           | NM_031156.1                                                                       | Mus musculus insulin degrading enzyme (Ide) mRNA.                                                                       |
| scf44432.6 461-S    | 0.96                | 1.00              | 0.97               | 0.87                  | 1.16                | 1.09                 | -0.14               | 0.22              | 0.17               | Oat1l         | NM_172478.1                                                                       | Mus musculus ornithine aminotransferase-like 1 (Oat1l) mRNA.                                                            |
| scf0027406.2 22-S   | 0.87                | 1.00              | 0.95               | 0.83                  | 1.28                | 1.07                 | -0.21               | 0.35              | 0.17               | Abcf3         | NM_013852.1                                                                       | Mus musculus ATP-binding cassette sub-family F (GCN20) member 3 (Abcf3) mRNA.                                           |
| scf000125.1 16-S    | 0.99                | 0.96              | 1.05               | 0.72                  | 1.22                | 1.18                 | -0.30               | 0.36              | 0.17               | Snp70         | NM_009224.2                                                                       | Mus musculus U1 small nuclear ribonucleoprotein polypeptide A (Snp70) mRNA.                                             |
| scf49729.15.1 130-S | 1.31                | 0.93              | 0.85               | 1.04                  | 1.09                | 0.95                 | -0.31               | 0.22              | 0.17               | Mcm4          | NM_008495.2                                                                       | Mus musculus minichromosome maintenance domain 4 homolog (S. cerevisiae) (Mcm4) mRNA.                                   |
| scf00109113.1 250-S | 0.87                | 1.09              | 0.99               | 0.74                  | 1.18                | 1.13                 | -0.30               | 0.31              | NM_144029.2        |               | Mus musculus ubiquitin-like containing PHD and RING finger domains 2 (Uhr2) mRNA. |                                                                                                                         |
| scf18417.10.1 104-S | 0.95                | 1.02              | 0.96               | 0.82                  | 1.04                | 1.08                 | -0.22               | 0.04              | 0.16               | 2610036D13Rik | NM_029282.1                                                                       | Mus musculus RIKEN cDNA 2610036D13 gene (2610036D13Rik) mRNA.                                                           |
| scf27424.11 172-S   | 0.94                | 1.00              | 0.94               | 0.80                  | 1.22                | 1.05                 | -0.23               | 0.29              | 0.16               | Pitpnb        | NM_019640.2                                                                       | Mus musculus phosphatidylinositol transfer protein beta (Pitpnb) mRNA.                                                  |
| scf42756.16.1 0-S   | 0.88                | 0.96              | 0.98               | 0.78                  | 1.23                | 1.09                 | -0.16               | 0.35              | 0.16               | Traf3         | NM_011632.1                                                                       | Mus musculus Tnf receptor-associated factor 3 (Traf3) mRNA.                                                             |
| scf0077371.2 183-S  | 0.84                | 1.08              | 1.00               | 0.63                  | 1.17                | 1.12                 | -0.42               | 0.12              | 0.16               | Sec24a        | NM_172555.2                                                                       | Mus musculus SEC24 related gene family member A (S. cerevisiae) (Sec24a) mRNA.                                          |
| scf29623.5 373-S    | 0.96                | 0.98              | 0.99               | 0.94                  | 1.22                | 1.10                 | -0.03               | 0.32              | 0.16               | Vhlh          | NM_009507                                                                         | Mus musculus von Hippel-Lindau syndrome homolog (Vhlh) mRNA.                                                            |
| scf39617.28.1 49-S  | 0.94                | 0.95              | 1.00               | 0.77                  | 1.11                | 1.10                 | -0.29               | 0.08              | 0.16               | Tirap4        | NM_011869.1                                                                       | Mus musculus thyroid hormone receptor associated protein 4 (Tirap4) mRNA.                                               |
| scf40638.21.1 60-S  | 0.96                | 0.98              | 0.98               | 0.86                  | 1.08                | 1.09                 | -0.38               | 0.22              | 0.15               | 387478M09Rik  | NM_058478.1                                                                       | Mus musculus RIKEN cDNA 387478M09 gene (387478M09Rik) mRNA.                                                             |
| scf25081.14.1 17-S  | 0.89                | 1.02              | 1.03               | 0.69                  | 1.19                | 1.14                 | -0.37               | 0.23              | 0.15               | D630045E04Rik | NM_153321.1                                                                       | Mus musculus RIKEN cDNA D630045E04 gene (D630045E04Rik) mRNA.                                                           |
| scf45300.29.4 484-S | 0.96                | 0.99              | 0.92               | 0.77                  | 1.19                | 1.02                 | -0.31               | 0.26              | 0.15               | Cog3          | NM_177381                                                                         | Mus musculus component of oligomeric golgi complex 3 (Cog3) mRNA.                                                       |
| scf52850.12 273-S   | 0.97                | 1.02              | 0.94               | 0.78                  | 1.19                | 1.04                 | -0.31               | 0.24              | 0.15               | Rela          | NM_009045.2                                                                       | Mus musculus v-rel reticuloendotheliosis viral oncogene homolog A (avian) (Rela) mRNA.                                  |
| scf17938.36.1 1-S   | 0.39                | 0.93              | 1.21               | 0.23                  | 1.21                | 1.32                 | -0.73               | 0.39              | 0.15               | Aox3          | NM_023617.1                                                                       | Mus musculus karyopherin (importin) alpha 1 (Kpn1) mRNA.                                                                |
| scf49185.16 349-S   | 0.84                | 1.03              | 0.96               | 0.71                  | 1.19                | 1.06                 | -0.24               | 0.20              | 0.15               | Kpn1          | NM_008465.2                                                                       | Mus musculus karyopherin (importin) alpha 1 (Kpn1) mRNA.                                                                |
| scf456258.4 7-S     | 0.93                | 0.94              | 0.99               | 1.05                  | 1.06                | 1.09                 | -0.24               | 0.18              | 0.15               | Hnrp2         | NM_008968.2                                                                       | Mus musculus heterogeneous nuclear ribonucleoprotein H2 (Hnrp2) mRNA.                                                   |
| scf0019108.2 18-S   | 1.04                | 1.03              | 0.96               | 1.00                  | 1.09                | 1.03                 | -0.01               | 0.18              | 0.15               | Hnrp2         | NM_018979.1                                                                       | Mus musculus protein kinase X-linked (Pklx) mRNA.                                                                       |
| scf0071371.1 2-S    | 1.27                | 0.91              | 0.86               | 1.14                  | 1.10                | 0.94                 | -0.15               | 0.28              | 0.15               | 2410016F19Rik | NM_026113.2                                                                       | Mus musculus RIKEN cDNA 2410016F19 gene (2410016F19Rik) mRNA.                                                           |
| scf36154.20.3 28-S  | 0.98                | 0.92              | 1.01               | 0.98                  | 1.07                | 1.11                 | 0.00                | 0.23              | 0.15               | Tyk2          | NM_018793.1                                                                       | Mus musculus tyrosine kinase 2 (Tyk2) mRNA.                                                                             |
| scf44750.12 316-S   | 0.96                | 1.04              | 0.96               | 0.79                  | 1.15                | 1.06                 | -0.28               | 0.16              | 0.15               | 2210404D11Rik | NM_178397.2                                                                       | Mus musculus RIKEN cDNA 2210404D11 gene (2210404D11Rik) mRNA.                                                           |
| scf0074838.1 14-S   | 0.96                | 0.97              | 1.00               | 0.79                  | 1.11                | 1.11                 | -0.27               | 0.18              | 0.14               | Narg1         | NM_053089.2                                                                       | Mus musculus NMDA receptor-regulated gene 1 (Narg1) mRNA.                                                               |
| scf52508.10.1 140-S | 0.94                | 1.07              | 0.98               | 0.73                  | 1.28                | 1.08                 | -0.36               | 0.29              | 0.14               | Cyp2c70       | NM_145499.1                                                                       | Mus musculus cytochrome P450 family 2 subfamily c polypeptide 70 (Cyp2c70) mRNA.                                        |
| scf067134.7 2-S     | 0.87                | 0.99              | 1.02               | 0.93                  | 1.37                | 1.12                 | 0.10                | 0.46              | 0.14               | Nes5a         | NM_024193.1                                                                       | Mus musculus nuclear protein 5A (Nes5a) mRNA.                                                                           |
| scf3357.72 419-S    | 0.83                | 1.01              | 0.99               | 0.87                  | 1.13                | 1.07                 | -0.28               | 0.21              | 0.14               | Gad45gap1     | NM_024558.2                                                                       | Mus musculus nuclear arsetate resistance protein 2 (Ans2) mRNA.                                                         |
| scf25881.20.1 16-S  | 0.91                | 0.99              | 1.01               | 0.78                  | 1.20                | 1.11                 | -0.22               | 0.26              | 0.14               | Ans2          | NM_031405.1                                                                       | Mus musculus nuclear arsetate resistance protein 2 (Ans2) mRNA.                                                         |
| scf29820.13 336-S   | 1.00                | 1.04              | 0.92               | 0.89                  | 1.18                | 1.01                 | -0.16               | 0.18              | 0.14               | Cct7          | NM_007638.2                                                                       | Mus musculus chaperonin subunit 7 (eta) (Cct7) mRNA.                                                                    |
| scf48691.8.1 1-S    | 0.76                | 0.94              | 1.04               | 0.86                  | 1.11                | 1.15                 | 0.16                | 0.25              | 0.14               | Slc25a1       | NM_153150.1                                                                       | Mus musculus solute carrier family 25 (mitochondrial carrier, citrate transporter) member 1 (Slc25a1) mRNA.             |
| scf29884.7.1 23-S   | 0.86                | 0.95              | 1.27               | 0.80                  | 1.54                | 1.38                 | -0.10               | 0.69              | 0.14               | BC014685      | NM_144916.1                                                                       | Mus musculus cDNA sequence BC014685 (BC014685) mRNA.                                                                    |
| scf017836.34 27-S   | 0.80                | 1.13              | 1.09               | 0.54                  | 1.00                | 1.20                 | -0.56               | -0.14             | 0.14               | Mug1          | NM_008645                                                                         | Mus musculus muringlobulin 1 (Mug1) mRNA.                                                                               |
| scf066069.9 217-S   | 1.07                | 1.04              | 0.94               | 0.85                  | 1.29                | 1.03                 | -0.33               | 0.30              | 0.14               | Rnu1t         | NM_178374.2                                                                       | Mus musculus RNA U transporter 1 (Rnu1t) mRNA.                                                                          |
| scf0017836.1 208-S  | 0.88                | 1.18              | 1.14               | 0.87                  | 1.13                | 1.07                 | -0.33               | 0.15              | 0.13               | Mug1          | NM_008645.2                                                                       | Mus musculus muringlobulin 1 (Mug1) mRNA.                                                                               |
| scf40632.19 335-S   | 0.90                | 1.07              | 0.99               | 0.73                  | 1.17                | 1.08                 | -0.30               | 0.15              | 0.13               | Rangap1       | NM_011241                                                                         | Mus musculus RAN GTPase activating protein 1 (Rangap1) mRNA.                                                            |
| scf050581.4.1 28-S  | 0.74                | 0.99              | 0.97               | 0.70                  | 1.16                | 1.06                 | -0.09               | 0.23              | 0.13               | 2310045B01Rik | NM_025538.1                                                                       | Mus musculus RIKEN cDNA 2310045B01 gene (2310045B01Rik) mRNA.                                                           |
| scf0277753.12 27-S  | 0.47                | 0.93              | 0.98               | 0.36                  | 1.14                | 1.07                 | -0.38               | 0.31              | 0.13               | MG25972       | NM_177406.2                                                                       | Mus musculus similar to cytochrome P450 4a10 (MG25972) mRNA.                                                            |
| scf35792.9 485-S    | 1.26                | 0.98              | 0.85               | 1.03                  | 1.08                | 0.93                 | -0.29               | 0.14              | 0.13               | Scamp5        | NM_020270.2                                                                       | Mus musculus secretory carrier membrane protein 5 (Scamp5) mRNA.                                                        |
| scf34405.19.1 52-S  | 1.13                | 0.98              | 0.86               | 1.05                  | 1.00                | 0.94                 | -0.11               | 0.04              | 0.13               | Fhod1         | NM_177699                                                                         | Mus musculus formin homolog 2 domain containing 1 (Fhod1) mRNA.                                                         |
| scf4148.25 5-S      | 0.96                | 1.10              | 0.99               | 0.67                  | 1.09                | 1.08                 | -0.52               | -0.02             | 0.13               | Hdc1          | NM_008242.2                                                                       | Mus musculus host cell factor C1 (Hdc1) mRNA.                                                                           |
| scf0013046.1 23-S   | 0.97                | 1.08              | 0.94               | 0.87                  | 1.13                | 1.07                 | -0.28               | 0.21              | 0.13               | Ubp1          | NM_024685.1                                                                       | Mus musculus CUG tri-nucleotide repeat expansion binding protein 1 (Cugbp1) transcript variant 2 mRNA.                  |
| scf0107094.1 210-S  | 1.02                | 0.93              | 0.94               | 0.75                  | 1.39                | 1.03                 | -0.45               | 0.57              | 0.13               | AA408556      | NM_199447.2                                                                       | Mus musculus expressed sequence AA408556 (AA408556) mRNA.                                                               |
| scf22303.28 240-S   | 1.56                | 0.92              | 0.78               | 1.08                  | 1.08                | 0.84                 | -0.53               | 0.22              | 0.13               | 1600019004Rik | NM_173182.1                                                                       | Mus musculus RIKEN cDNA 1600019004 gene (1600019004Rik) mRNA.                                                           |
| scf47395.8.8 1-S    | 0.89                | 1.01              | 1.04               | 0.78                  | 1.31                | 1.13                 | -0.19               | 0.37              | 0.13               | 1110064N10Rik | NM_026396.2                                                                       | Mus musculus RIKEN cDNA 1110064N10 gene (1110064N10Rik) mRNA.                                                           |
| scf0067417.2 199-S  | 1.01                | 0.96              | 0.96               | 0.79                  | 1.19                | 1.05                 | -0.35               | 0.32              | 0.12               | 323040101Rik  | NM_026140.2                                                                       | Mus musculus RIKEN cDNA 323040101 gene (323040101Rik) mRNA.                                                             |
| scf0110829.10 232-S | 1.21                | 0.98              | 0.82               | 1.05                  | 1.01                | 0.90                 | -0.21               | 0.05              | 0.12               | Lims1         | NM_026148.1                                                                       | Mus musculus LIM and senescent cell antigen-like domains 1 (Lims1) mRNA.                                                |
| scf30745.14.1 281-S | 0.58                | 0.88              | 1.11               | 0.50                  | 1.34                | 1.21                 | -0.20               | 0.63              | 0.12               | 1700007B13Rik | NM_133905.1                                                                       | Mus musculus RIKEN cDNA 1700007B13 gene (1700007B13Rik) mRNA.                                                           |
| scf022680.1 25-S    | 0.92                | 0.98              | 1.05               | 0.80                  | 1.09                | 1.14                 | -0.21               | 0.16              | 0.12               | Zfp207        | NM_011751.1                                                                       | Mus musculus zinc finger protein 207 (Zfp207) mRNA.                                                                     |
| scf40058.14.79 66-S | 0.66                | 0.93              | 1.03               | 0.60                  | 1.26                | 1.12                 | -0.13               | 0.43              | 0.12               | Sec142        | NM_144520.1                                                                       | Mus musculus SEC14-like 2 (S. cerevisiae) (Sec142) mRNA.                                                                |
| scf23892.3.1 1-S    | 0.90                | 0.93              | 1.03               | 0.81                  | 1.40                | 1.12                 | -0.14               | 0.58              | 0.12               | 6330579B17Rik | NM_026494.1                                                                       | Mus musculus RIKEN cDNA 6330579B17 gene (6330579B17Rik) mRNA.                                                           |
| scf020818.1 29-S    | 1.38                | 0.83              | 0.77               | 1.21                  | 1.15                | 0.84                 | -0.19               | 0.47              | 0.12               | Srpb          | NM_009275.2                                                                       | Mus musculus signal recognition particle receptor B subunit (Srpb) mRNA.                                                |
| scf0090311.1 306-S  | 0.96                | 0.95              | 0.98               | 0.96                  | 1.30                | 1.06                 | 0.01                | 0.45              | 0.12               | Comm7         | NM_133850.1                                                                       | Mus musculus COMM domain containing 7 (Comm7) mRNA.                                                                     |
| scf45413.15 171-S   | 0.97                | 1.02              | 0.97               | 0.83                  | 1.13                | 1.05                 | -0.22               | 0.16              | 0.12               | Elp3          | NM_028811.1                                                                       | Mus musculus elongation protein 3 homolog (S. cerevisiae) (Elp3) mRNA.                                                  |
| scf055039.15 103-S  | 0.94                | 1.02              | 0.95               | 0.66                  | 1.29                | 1.02                 | -0.52               | 0.34              | 0.11               | Ddx3x         | NM_010028                                                                         | Mus musculus DEAD/H (Asp-Glu-Ala-Asp-His) box polypeptide 3 X-linked (Ddx3x) mRNA.                                      |
| scf01512.71 302-S   | 0.85                | 1.00              | 1.02               | 0.67                  | 1.06                | 1.10                 | -0.35               | 0.11              | 0.11               | Arhdc3        | NM_009633.2                                                                       | Mus musculus DEAD/H (Asp-Glu-Ala-Asp-His) box polypeptide 3 X-linked (Arhdc3) mRNA.                                     |
| scf23657.21.1 97-S  | 0.95                | 0.98              | 1.07               | 0.82                  | 1.13                | 1.07                 | -0.12               | 0.31              | 0.09               | D7Erat156e    | NM_010507.2                                                                       | Mus musculus DNA segment C17.7 ERATO Do 156 expressed (D7Erat156e) mRNA.                                                |
| scf0001129.1 2-S</  |                     |                   |                    |                       |                     |                      |                     |                   |                    |               |                                                                                   |                                                                                                                         |

| Gene Name            | Control<br>18 Hours | Control<br>1 Week | Control<br>4 Weeks | Treatment<br>18 Hours | Treatment<br>1 Week | Treatment<br>4 Weeks | Log2 FC<br>18 Hours | Log2 FC<br>1 Week | Log2 FC<br>4 Weeks | Symbol        | Accession   | Definition                                                                                                   |
|----------------------|---------------------|-------------------|--------------------|-----------------------|---------------------|----------------------|---------------------|-------------------|--------------------|---------------|-------------|--------------------------------------------------------------------------------------------------------------|
| scf0002721.1 25-S    | 0.92                | 0.94              | 1.08               | 0.77                  | 1.12                | 1.13                 | -0.26               | 0.24              | 0.08               | Ece1          | NM_199307   | Mus musculus endothelin converting enzyme 1 (Ece1) mRNA.                                                     |
| scf015384.1 1-S      | 0.85                | 0.96              | 1.02               | 0.75                  | 1.16                | 1.08                 | -0.17               | 0.28              | 0.08               | Hrrpab        | NM_010448.2 | Mus musculus heterogeneous nuclear ribonucleoprotein A/B (Hrrpab) mRNA.                                      |
| scf022224.14 3-S     | 0.88                | 0.93              | 1.04               | 0.74                  | 1.15                | 1.09                 | -0.24               | 0.31              | 0.08               | Usp10         | NM_009462.1 | Mus musculus ubiquitin specific protease 10 (Usp10) mRNA.                                                    |
| scf028355.1 139-S    | 0.94                | 1.00              | 1.03               | 0.86                  | 1.27                | 1.08                 | -0.12               | 0.35              | 0.07               | Usp39         | NM_138592.1 | Mus musculus ubiquitin specific protease 39 (Usp39) mRNA.                                                    |
| scf018021.2 84-S     | 0.77                | 1.05              | 0.98               | 0.64                  | 1.18                | 1.03                 | -0.28               | 0.35              | 0.07               | Nluc3         | NM_019325.1 | Mus musculus nuclear factor of activated T-cells cytoplasmic calcineurin-dependent 3 (Nluc3) mRNA.           |
| scf0216760.3 93-S    | 0.99                | 1.02              | 0.99               | 0.82                  | 1.08                | 1.04                 | -0.28               | 0.08              | 0.07               | Map3          | NM_145426.1 | Mus musculus PRP3 pre-mRNA processing factor 3 homolog (yeast) (Prp3) mRNA.                                  |
| scf070767.1 256-S    | 0.95                | 1.05              | 0.97               | 0.82                  | 1.19                | 1.02                 | -0.22               | 0.18              | 0.07               | Pip3          | NM_027541.2 | Mus musculus PRP3 pre-mRNA processing factor 3 homolog (yeast) (Pip3) mRNA.                                  |
| scf016882.2 141-S    | 1.04                | 0.97              | 0.98               | 0.84                  | 1.19                | 1.03                 | -0.31               | 0.29              | 0.07               | Lig3          | NM_010716.1 | Mus musculus ligase III DNA ATP-dependent (Lig3) mRNA.                                                       |
| scf542274.1 188-S    | 0.99                | 1.02              | 0.97               | 0.73                  | 1.08                | 1.02                 | -0.44               | 0.09              | 0.07               | Tmem32        | NM_146234.2 | Mus musculus hairy and enhancer of split 6 (Drosophila) (Hes6) mRNA.                                         |
| scf000908.1 4-S      | 0.93                | 0.94              | 1.19               | 0.92                  | 1.68                | 1.26                 | -0.02               | 0.83              | 0.07               | Hes6          | NM_019479.2 | Mus musculus hairy and enhancer of split 6 (Drosophila) (Hes6) mRNA.                                         |
| scf326350.18 440-S   | 0.90                | 0.96              | 1.02               | 0.84                  | 1.28                | 1.07                 | -0.09               | 0.41              | 0.07               | Hmrt13        | NM_133740.1 | Mus musculus heterogeneous nuclear ribonucleoprotein methyltransferase-like 3 (S. cerevisiae) (Hmrt13) mRNA. |
| scf04706.58 26-S     | 0.91                | 1.13              | 1.05               | 0.94                  | 1.13                | 1.03                 | -0.28               | 0.10              | 0.05               | Trap1         | NM_013029.1 | Mus musculus FK506 binding protein 12 rapamycin associated protein 1 (Trap1) mRNA.                           |
| scf418647.0 0-S      | 0.77                | 0.93              | 1.04               | 0.69                  | 1.18                | 1.09                 | -0.16               | 0.33              | 0.06               | 061004215Rik  | NM_019661.2 | Mus musculus RIKEN cDNA 061004215 gene (061004215Rik) mRNA.                                                  |
| scf43855.2 92-S      | 0.85                | 0.98              | 1.07               | 0.77                  | 1.37                | 1.12                 | -0.15               | 0.48              | 0.06               | Rygmtd1       | NM_029092.1 | Mus musculus RNA (guanine-9-) methyltransferase domain containing 1 (Rygmtd1) mRNA.                          |
| scf0067465.2 67-S    | 1.02                | 1.05              | 0.95               | 0.80                  | 1.23                | 1.00                 | -0.35               | 0.22              | 0.06               | Sl3a1         | NM_026175.3 | Mus musculus splicing factor 3a subunit 1 (Sl3a1) mRNA.                                                      |
| scf24984.5.1 10-S    | 0.97                | 1.05              | 1.04               | 0.86                  | 1.51                | 1.09                 | -0.17               | 0.52              | 0.06               | BC023823      | NM_153566.1 | Mus musculus cDNA sequence BC023823 (BC023823) mRNA.                                                         |
| scf17096.10 189-S    | 0.92                | 1.03              | 1.01               | 0.79                  | 1.21                | 1.05                 | -0.20               | 0.24              | 0.06               | Bpnt1         | NM_011794.2 | Mus musculus bisphosphate 3-nucleotidase 1 (Bpnt1) mRNA.                                                     |
| scf0014897.1 159-S   | 0.93                | 1.13              | 0.99               | 0.67                  | 1.13                | 1.04                 | -0.48               | 0.07              | 0.06               | Trp12         | NM_133975.2 | Mus musculus bisphosphate 3-nucleotidase 1 (Bpnt1) mRNA.                                                     |
| scf02134999.1 185-S  | 0.97                | 1.09              | 1.03               | 0.73                  | 1.13                | 1.06                 | -0.40               | 0.32              | 0.03               | Pfwe2         | NM_172518.2 | Mus musculus RIKEN cDNA D930036F22Rik (D930036F22Rik) mRNA.                                                  |
| scf0320487.1 23-S    | 0.94                | 0.98              | 1.07               | 0.77                  | 1.07                | 1.10                 | -0.30               | 0.13              | 0.03               | 061004215Rik  | NM_177171.3 | Mus musculus RIKEN cDNA E130203B14Rik (E130203B14Rik) mRNA.                                                  |
| scf46470.8.1 0-S     | 1.20                | 0.95              | 0.89               | 1.06                  | 1.03                | 0.93                 | -0.16               | 0.12              | 0.06               | E130203B14Rik | NM_178791.2 | Mus musculus RIKEN cDNA E130203B14Rik (E130203B14Rik) mRNA.                                                  |
| scf4183.10.1 0-S     | 0.86                | 0.98              | 1.02               | 0.72                  | 1.13                | 1.05                 | -0.24               | 0.20              | 0.05               | Alkhsa1       | NM_172532.1 | Mus musculus RIKEN cDNA 1500032D16Rik (1500032D16Rik) mRNA.                                                  |
| scf50873.6.1 76-S    | 0.89                | 1.05              | 1.00               | 0.90                  | 1.23                | 1.03                 | 0.03                | 0.23              | 0.04               | 1500032D16Rik | NM_030087.1 | Mus musculus RIKEN cDNA 1500032D16Rik (1500032D16Rik) mRNA.                                                  |
| scf029876.1 59-S     | 1.00                | 0.93              | 1.01               | 0.78                  | 1.31                | 1.04                 | -0.36               | 0.50              | 0.04               | Cloc4         | XM_124389.1 | Mus musculus chloride intracellular channel 4 (mitochondrial) (Cloc4) mRNA.                                  |
| scf00210146.1 172-S  | 0.94                | 0.97              | 1.03               | 0.77                  | 1.34                | 1.06                 | -0.29               | 0.46              | 0.04               | AF322649      | NM_153134.2 | Mus musculus cDNA sequence AF322649 (AF322649) mRNA.                                                         |
| scf0210103.2 45-S    | 0.85                | 0.96              | 1.00               | 0.70                  | 1.11                | 1.03                 | -0.28               | 0.04              | 0.04               | E430012M05Rik | NM_030102.2 | Mus musculus RIKEN cDNA E430012M05Rik (E430012M05Rik) mRNA.                                                  |
| scf0070686.2 11-S    | 0.86                | 1.02              | 1.19               | 0.74                  | 1.28                | 1.06                 | -0.28               | 0.06              | 0.04               | 130447.1      | NM_130447.1 | Mus musculus dual specificity phosphatase 15 (Dusp15) mRNA.                                                  |
| scf066958.2 91-S     | 0.95                | 1.05              | 0.88               | 1.04                  | 1.15                | 0.91                 | -0.26               | 0.29              | 0.04               | 2310042M24Rik | NM_025866.1 | Mus musculus RIKEN cDNA 2310042M24Rik (2310042M24Rik) mRNA.                                                  |
| scf33796.16.1 75-S   | 0.86                | 0.98              | 0.98               | 0.65                  | 1.10                | 1.00                 | -0.38               | 0.17              | 0.04               | Aadat         | NM_011834.1 | Mus musculus RNA polymerase I associated factor (Paf53) mRNA.                                                |
| scf0064424.2 263-S   | 0.96                | 1.01              | 0.97               | 0.95                  | 1.33                | 0.99                 | -0.02               | 0.40              | 0.04               | Paf53         | NM_022811.1 | Mus musculus RNA polymerase I associated factor (Paf53) mRNA.                                                |
| scf22895.12.1 51-S   | 0.88                | 1.00              | 1.04               | 0.75                  | 1.05                | 1.07                 | -0.23               | 0.07              | 0.03               | Pik4cb        | NM_175356.1 | Mus musculus phosphatidylinositol 4-kinase catalytic beta polypeptide (Pik4cb) mRNA.                         |
| scf24827.11.452 11-S | 0.80                | 0.94              | 1.06               | 0.84                  | 1.11                | 1.09                 | 0.08                | 0.25              | 0.03               | Hmgcl         | NM_008254.1 | Mus musculus 3-hydroxy-3-methylglutaryl-Coenzyme A lyase (Hmgcl) mRNA.                                       |
| scf45350.3.1 15-S    | 0.86                | 0.95              | 1.02               | 0.80                  | 1.13                | 1.04                 | -0.11               | 0.25              | 0.03               | Hprt          | NM_013096.2 | Mus musculus hypoxanthine phosphoribosyl transferase (Hprt) mRNA.                                            |
| scf06558.18 80-S     | 0.84                | 0.95              | 1.05               | 0.65                  | 1.17                | 1.04                 | -0.30               | 0.13              | 0.03               | Gart25        | NM_133989.2 | Mus musculus GART domain containing 25 (Gart25) mRNA.                                                        |
| scf0109006.2 49-S    | 0.75                | 0.97              | 1.03               | 0.68                  | 1.30                | 1.05                 | -0.15               | 0.44              | 0.03               | Ctbp1         | NM_134141.2 | Mus musculus RIKEN cDNA 2610528A15Rik (2610528A15Rik) mRNA.                                                  |
| scf43496.27.1 1-S    | 0.94                | 1.08              | 1.03               | 0.73                  | 1.29                | 1.05                 | -0.38               | 0.26              | 0.02               | 2610528A15Rik | NM_028151.1 | Mus musculus RIKEN cDNA 2610528A15Rik (2610528A15Rik) mRNA.                                                  |
| scf000022.1 12-S     | 0.89                | 1.00              | 1.01               | 0.72                  | 1.17                | 1.02                 | -0.29               | 0.24              | 0.02               | Cpt2          | NM_009949   | Mus musculus carnitine palmitoyltransferase 2 (Cpt2) mRNA.                                                   |
| scf0018472.1 99-S    | 1.06                | 1.21              | 1.00               | 0.84                  | 0.96                | 1.02                 | -0.34               | -0.35             | 0.02               | Pafah1b1      | NM_013625.1 | Mus musculus platelet-activating factor acetylhydrolase isoform 1b beta1 subunit (Pafah1b1) mRNA.            |
| scf26224.14.1 3-S    | 0.84                | 1.03              | 1.01               | 0.79                  | 1.15                | 1.02                 | -0.09               | 0.16              | 0.02               | A1326906      | NM_153570.2 | Mus musculus expressed sequence A1326906 (A1326906) mRNA.                                                    |
| scf001647.1 23-S     | 0.76                | 0.94              | 1.08               | 0.72                  | 1.13                | 1.08                 | -0.09               | 0.28              | 0.02               | 0610011F06Rik | NM_021251.3 | Mus musculus RIKEN cDNA 0610011F06 gene (0610011F06Rik) mRNA.                                                |
| scf0075423.2 59-S    | 0.75                | 0.92              | 1.19               | 0.74                  | 1.13                | 1.02                 | -0.32               | 0.13              | 0.01               | 2810410P22Rik | NM_182944.1 | Mus musculus cytidine 5-triphosphate synthase (Ctps) mRNA.                                                   |
| scf23887.17.1 103-S  | 0.95                | 1.08              | 0.95               | 0.79                  | 1.32                | 0.94                 | -0.22               | 0.30              | 0.01               | Ctps          | NM_016748.1 | Mus musculus cytidine 5-triphosphate synthase (Ctps) mRNA.                                                   |
| scf16476.4 568-S     | 0.89                | 0.97              | 1.20               | 0.81                  | 1.70                | 1.22                 | -0.13               | 0.78              | 0.01               | Hes6          | NM_019479.2 | Mus musculus hairy and enhancer of split 6 (Drosophila) (Hes6) mRNA.                                         |
| scf19069.14 351-S    | 0.98                | 0.98              | 1.02               | 0.81                  | 1.02                | 1.03                 | -0.27               | 0.06              | 0.01               | Zdhc5         | NM_144887.3 | Mus musculus zinc finger DHHC domain containing 5 (Zdhc5) mRNA.                                              |
| scf0067590.2 244-S   | 1.13                | 0.95              | 0.98               | 1.03                  | 1.00                | 0.98                 | -0.13               | 0.06              | 0.01               | 4930521E07Rik | NM_026260.2 | Mus musculus RIKEN cDNA 4930521E07 gene (4930521E07Rik) mRNA.                                                |
| scf014852.1 8-S      | 0.89                | 0.98              | 1.00               | 0.73                  | 1.17                | 1.01                 | -0.28               | 0.25              | 0.01               | Gsp1          | NM_146066.1 | Mus musculus G1 to phase transition 1 (Gsp1) mRNA.                                                           |
| scf006488.1 275-S    | 0.93                | 0.90              | 1.12               | 0.87                  | 1.12                | 1.13                 | -0.11               | 0.31              | 0.00               | 2010309E21Rik | XM_257558.1 | Mus musculus RIKEN cDNA 2010309E21Rik (2010309E21Rik) mRNA.                                                  |
| scf19273.11.127 68-S | 1.10                | 0.99              | 1.00               | 0.90                  | 1.28                | 1.03                 | -0.18               | 0.25              | 0.00               | Fabp3         | NM_018725.1 | Mus musculus fatty acid binding protein 3 (Fabp3) mRNA.                                                      |
| scf007510.1 219-S    | 0.96                | 0.96              | 1.03               | 0.87                  | 1.15                | 1.03                 | -0.14               | 0.25              | 0.00               | N23837.2      | NM_028387.2 | Mus musculus RNA binding motif protein 12 (Rbm12) transcript variant 1 mRNA.                                 |
| scf020382.2 66-S     | 0.90                | 0.95              | 1.07               | 0.74                  | 1.25                | 1.07                 | -0.29               | 0.39              | 0.00               | Sfrs2         | NM_011358.1 | Mus musculus splicing factor arginine/serine-rich 2 (Sfrs2) mRNA.                                            |
| scf25295.54.1 177-S  | 0.99                | 1.05              | 0.99               | 0.73                  | 1.14                | 0.98                 | -0.45               | 0.13              | -0.01              | BC057079      | XM_283973.2 | Mus musculus matrix metalloproteinase 14 (membrane-inserted) (Mmp14) mRNA.                                   |
| scf0002099.1 352-S   | 1.04                | 1.07              | 1.02               | 0.87                  | 0.94                | 1.02                 | -0.25               | -0.19             | -0.01              | Pias3         | NM_146135.1 | Mus musculus protein inhibitor of activated STAT 3 (Pias3) transcript variant 1 mRNA.                        |
| scf0030046.1 16-S    | 1.01                | 1.09              | 1.05               | 0.83                  | 0.83                | 1.04                 | -0.27               | -0.40             | -0.02              | Zfp292        | NM_013889.1 | Mus musculus zinc finger protein 292 (Zfp292) mRNA.                                                          |
| scf0001993.1 2-S     | 0.74                | 0.93              | 1.10               | 0.77                  | 1.09                | 1.09                 | 0.05                | 0.23              | -0.02              | Paf112        | NM_144996.2 | Mus musculus PE112-like (yeast) (Paf112) mRNA.                                                               |
| scf070478.15 14-S    | 0.87                | 1.13              | 1.01               | 0.65                  | 1.08                | 1.03                 | -0.16               | 0.18              | -0.08              | Ccs           | NM_016992.2 | Mus musculus copper chaperone for superoxide dismutase (Ccs) mRNA.                                           |
| scf1579.17 83-S      | 1.12                | 1.14              | 0.99               | 0.85                  | 1.00                | 0.98                 | -0.34               | -0.16             | -0.02              | Kctd3         | NM_028436.1 | Mus musculus potassium channel tetramerisation domain containing 3 (Kctd3) mRNA.                             |
| scf37876.12 7-S      | 0.82                | 1.09              | 1.05               | 0.72                  | 0.93                | 1.03                 | -0.19               | -0.23             | -0.03              | Sirt1         | NM_019812.1 | Mus musculus sirtuin 1 (silent mating type information regulation 2 homolog) 1 (S. cerevisiae) (Sirt1) mRNA. |
| scf39170.8.1 34-S    | 0.92                | 1.01              | 1.03               | 0.92                  | 1.23                | 1.01                 | -0.01               | 0.28              | -0.03              | Nup43         | NM_145706.1 | Mus musculus RIKEN cDNA C330006K01Rik (C330006K01Rik) mRNA.                                                  |
| scf0231855.15 16-S   | 1.13                | 1.07              | 0.97               | 0.91                  | 0.82                | 0.95                 | -0.34               | -0.39             | -0.04              | C330006K01Rik | NM_172725.1 | Mus musculus RIKEN cDNA C330006K01Rik (C330006K01Rik) mRNA.                                                  |
| scf067781.14 22-S    | 0.94                | 1.00              | 1.07               | 0.88                  | 1.16                | 1.03                 | -0.09               | 0.22              | -0.04              | Irf2          | NM_026374   | Mus musculus interleukin enhancer binding factor 2 (Irf2) mRNA.                                              |
| scf0016597.1 0-S     | 1.33                | 1.08              | 1.01               | 0.93                  | 0.95                | 0.98                 | -0.51               | -0.19             | -0.05              | Klf12         | NM_010636.2 | Mus musculus Kruppel-like factor 12 (Klf12) mRNA.                                                            |
| scf066886.2 283-S    | 1.05                | 1.04              | 1.06               | 0.92                  | 1.08                | 1.03                 | -0.21               | 0.19              | -0.02              | Ash2          | NM_027435.1 | Mus musculus ash2 (absent small t homologue)-like (Drosophila) (Ash2) mRNA.                                  |
| scf0099237.1 73-S    | 1.00                | 1.17              | 1.08               | 0.79                  | 1.03                | 1.04                 | -0.35               | -0.20             | -0.05              | Tm9a4         | NM_133847.2 | Mus musculus discoidin CUB and LCL domain containing 1 (Dcbt1) mRNA.                                         |
| scf0286.11 185-S     | 0.90                | 0.95              | 1.19               | 0.81                  | 1.09                | 1.13                 | -0.14               | 0.21              | -0.06              | Irf5          | NM_012057.1 | Mus musculus interferon regulatory factor 5 (Irf5) mRNA.                                                     |
| scf46305.13 322-S    | 1.34                | 0.82              | 0.89               | 1.17                  | 1.13                | 0.85                 | -0.18               | 0.45              | -0.06              | Mmp14         | NM_008608.2 | Mus musculus matrix metalloproteinase 14 (membrane-inserted) (Mmp14) mRNA.                                   |
| scf0103268.1 94-S    | 1.11                | 1.12              | 1.03               | 0.85                  | 0.91                | 0.99                 | -0.38               | -0.31             | -0.06              | 2410017P07Rik | NM_026643.2 | Mus musculus RIKEN cDNA 2410017P07 gene (2410017P07Rik) mRNA.                                                |
| scf50113.16.1 150-S  | 0.93                | 1.10              | 1.02               | 0.81                  | 1.26                | 0.99                 | -0.21               | 0.20              | -0.06              | Srp1          | NM_016795.2 | Mus musculus serine/arginine-rich protein specific kinase 1 (Srp1) mRNA.                                     |
| scf0210711.2 41-S    | 0.96                | 1.00              | 1.03               | 0.82                  | 1.12                | 0.99                 | -0.23               | 0.18              | -0.06              | 1110007A13Rik | NM_145955.2 | Mus musculus RIKEN cDNA 1110007A13Rik (1110007A13Rik) mRNA.                                                  |
| scf3474.8.1 75-S     | 0.74                | 0.96              | 1.07               | 0.65                  | 1.08                | 1.03                 | -0.16               | 0.18              | -0.08              | Ccs           | NM_016992.2 | Mus musculus copper chaperone for superoxide dismutase (Ccs) mRNA.                                           |
| scf3770.127 11-S     | 0.95                | 0.99              | 1.10               | 0.80                  | 1.12                | 1.06                 | -0.27               | 0.17              | -0.06              | Np1           | NM_010925.1 | Mus musculus novel nuclear protein 1 (Np1) mRNA.                                                             |
| scf29220.9 30-S      | 1.28                | 1.02              | 0.97               | 1.03                  | 1.06                | 0.92                 | -0.31               | 0.06              | -0.06              | AA407452      | XM_145140.3 | Mus musculus EST AA407452 (AA407452) mRNA.                                                                   |
| scf079264.1 0-S      | 0.98                | 0.97              | 1.06               | 0.81                  | 1.12                | 1.01                 | -0.27               | 0.21              | -0.07              | Com1          | NM_030675.2 | Mus musculus cerebral cavernous malformations 1 (Com1) mRNA.                                                 |
| scf014081.20 10-S    | 0.53                | 0.90              | 1.24               | 0.40                  | 1.22                | 1.18                 | -0.39               | 0.43              | -0.07              | Aci1          | NM_007981.2 | Mus musculus acyl-CoA synthetase long-chain family member 1 (Aci1) mRNA.                                     |
| scf00347722.2 310-S  | 1.21                | 1.06              | 0.98               | 1.05                  | 0.92                | 0.93                 | -0.21               | -0.20             | -0.08              | Centg2        | NM_178119.2 | Mus musculus centaurin gamma 2 (Centg2) mRNA.                                                                |
| scf40859.13.1 14-S   | 2.09                | 1.05              | 0.92               | 1.63                  | 0.84                | 0.87                 | -0.35               | -0.32             | -0.08              | Gri1          | NM_008175.2 | Mus musculus granulins (Gri1) mRNA.                                                                          |
| scf3486.15 131-S     | 1.24                | 1.12              | 0.98               | 0.92                  | 1.04                | 0.93                 | -0.33               | -0.42             | -0.10              | 4930470D19Rik | NM_025274.2 | Mus musculus RIKEN cDNA 4930470D19Rik (4930470D19Rik) mRNA.                                                  |
| scf002380.2 287-S    | 0.94                | 1.02              | 1.03               | 0.85                  | 1.06                | 0.92                 | -0.15               | 0                 |                    |               |             |                                                                                                              |

| Gene Name           | Control<br>18 Hours | Control<br>1 Week | Control<br>4 Weeks | Treatment<br>18 Hours | Treatment<br>1 Week | Treatment<br>4 Weeks | Log2 FC<br>18 Hours | Log2 FC<br>1 Week | Log2 FC<br>4 Weeks | Symbol        | Accession    | Definition                                                                                                                                        |
|---------------------|---------------------|-------------------|--------------------|-----------------------|---------------------|----------------------|---------------------|-------------------|--------------------|---------------|--------------|---------------------------------------------------------------------------------------------------------------------------------------------------|
| scf47892.24_470-S   | 0.93                | 1.20              | 1.12               | 0.74                  | 0.93                | 1.02                 | -0.33               | -0.36             | -0.14              | D15Erd621e    | NM_145959.1  |                                                                                                                                                   |
| scf0004207.1_37-S   | 0.98                | 1.10              | 1.03               | 0.78                  | 0.99                | 0.93                 | -0.33               | -0.15             | -0.15              | Fastk         | NM_023229.1  | Mus musculus Fas-activated serine/threonine kinase (Fastk) mRNA.                                                                                  |
| scf43053.27.1_6-S   | 0.98                | 1.08              | 1.04               | 0.78                  | 1.01                | 0.94                 | -0.33               | -0.10             | -0.15              | Gphn          | NM_127952.1  | Mus musculus gephyrin (Gphn) mRNA.                                                                                                                |
| scf53989.25_581-S   | 0.92                | 1.26              | 1.17               | 0.78                  | 1.04                | 1.05                 | -0.24               | -0.27             | -0.15              | Zfp261        | NM_019831.1  | Mus musculus zinc finger protein 261 (Zfp261) mRNA.                                                                                               |
| scf0218103.1_145-S  | 0.83                | 0.80              | 1.14               | 0.75                  | 1.08                | 1.03                 | -0.23               | -0.28             | -0.13              | Sic17a2       | NM_144836.1  |                                                                                                                                                   |
| scf0068421.2_70-S   | 1.04                | 1.06              | 1.06               | 0.91                  | 1.01                | 0.96                 | -0.20               | -0.07             | -0.15              | G010001K20Rik | NM_025719.1  | Mus musculus RIKEN cDNA 0910001K20 gene (0910001K20Rik) mRNA.                                                                                     |
| scf36724.29_71-S    | 0.96                | 1.11              | 1.09               | 0.77                  | 0.98                | 0.98                 | -0.32               | -0.19             | -0.16              | Nedd4         | NM_010890.2  | Mus musculus neural precursor cell expressed developmentally down-regulated gene 4 (Nedd4) mRNA.                                                  |
| scf0218103.11_32-S  | 0.76                | 0.91              | 1.14               | 0.70                  | 1.07                | 1.02                 | -0.11               | 0.26              | -0.16              | Sic17a2       | NM_144836.1  |                                                                                                                                                   |
| scf0066819.2_213-S  | 1.12                | 1.17              | 0.99               | 0.83                  | 1.09                | 0.89                 | -0.44               | -0.11             | -0.16              | G130422G05Rik | NM_025782.2  | Mus musculus RIKEN cDNA 9130422G05 gene (9130422G05Rik) mRNA.                                                                                     |
| scf24063.27.1_21-S  | 1.15                | 1.01              | 1.02               | 0.80                  | 0.93                | 0.92                 | -0.51               | -0.12             | -0.16              | Jak1          | NM_146145.1  | Mus musculus Janus kinase 1 (Jak1) mRNA.                                                                                                          |
| scf29242.30.1_27-S  | 1.24                | 1.00              | 1.07               | 0.96                  | 0.91                | 0.96                 | -0.36               | -0.14             | -0.16              | Cadps2        | NM_153163.2  | Mus musculus Janus kinase 1 (Cadps2) mRNA.                                                                                                        |
| scf49175.14_151-S   | 0.92                | 0.94              | 1.19               | 0.81                  | 1.25                | 0.91                 | -0.09               | 0.41              | -0.19              | G680448A09Rik | NM_171128.2  |                                                                                                                                                   |
| scf014007.1_13-S    | 1.11                | 1.18              | 1.07               | 0.82                  | 1.01                | 0.95                 | -0.43               | -0.22             | -0.17              | Cugbp2        | NM_010160.1  | Mus musculus CLUG triplet repeat RNA binding protein 2 (Cugbp2) mRNA.                                                                             |
| scf0003896.1_252-S  | 0.90                | 0.93              | 1.14               | 0.73                  | 1.14                | 1.02                 | -0.28               | 0.29              | -0.17              | Igf1          | NM_010512    | Mus musculus insulin-like growth factor 1 (Igf1) mRNA.                                                                                            |
| scf068178.1_250-S   | 1.07                | 1.21              | 1.16               | 0.79                  | 1.02                | 1.01                 | -0.43               | -0.25             | -0.18              | 4933421H10Rik | NM_026599.3  | Mus musculus RIKEN cDNA 4933421H10 gene (4933421H10Rik) mRNA.                                                                                     |
| scf41225.47_412-S   | 1.10                | 1.02              | 1.08               | 0.87                  | 0.88                | 0.97                 | -0.34               | -0.21             | -0.18              | Myo18a        | NM_011586.1  | Mus musculus myosin XVIIIa (Myo18a) mRNA.                                                                                                         |
| scf000057.1_28-S    | 1.28                | 1.00              | 0.99               | 1.08                  | 0.96                | 0.87                 | -0.25               | -0.06             | -0.18              | Nme7          | NM_138314.1  | Mus musculus non-metastatic cells 7 protein expressed in (Nme7) mRNA.                                                                             |
| scf0019055.2_130-S  | 0.88                | 1.28              | 1.20               | 0.73                  | 1.06                | 1.06                 | -0.27               | -0.28             | -0.18              | Ppp3ca        | NM_008913.1  | Mus musculus protein phosphatase 3 catalytic subunit alpha isoform (Ppp3ca) mRNA.                                                                 |
| scf326181.9_15-S    | 1.04                | 1.06              | 1.07               | 0.88                  | 0.97                | 0.95                 | -0.25               | -0.13             | -0.19              | Rera          | NM_011305.2  | Mus musculus retinoid X receptor alpha (Rera) mRNA.                                                                                               |
| scf0072313.2_218-S  | 0.99                | 1.21              | 1.19               | 0.71                  | 1.01                | 1.05                 | -0.48               | -0.26             | -0.19              | 251002A14Rik  | NM_028194.1  | Mus musculus RIKEN cDNA 251002A14 gene (251002A14Rik) mRNA.                                                                                       |
| scf0021732.2_273-S  | 0.94                | 0.93              | 1.15               | 0.81                  | 1.20                | 1.01                 | -0.22               | 0.35              | -0.20              | 2310044G17Rik | NM_173755.2  | Mus musculus RIKEN cDNA 2310044G17 gene (2310044G17Rik) mRNA.                                                                                     |
| scf097820.1_227-S   | 0.95                | 1.02              | 1.08               | 0.80                  | 1.14                | 0.95                 | -0.23               | 0.14              | -0.20              | 4833439L19Rik | NM_133797    | Mus musculus RIKEN cDNA 4833439L19 gene (4833439L19Rik) mRNA.                                                                                     |
| scf0233835.12_26-S  | 0.96                | 1.18              | 1.22               | 0.71                  | 0.93                | 1.06                 | -0.43               | -0.34             | -0.20              | Tnrc6         | NM_144925.2  | Mus musculus trinucleotide repeat containing 6 (Tnrc6) mRNA.                                                                                      |
| scf067869.4_264-S   | 1.07                | 1.11              | 1.01               | 0.94                  | 0.99                | 0.88                 | -0.18               | -0.17             | -0.20              | Paip2         | NM_026420.1  | Mus musculus polyadenylate-binding protein-interacting protein 2 (Paip2) mRNA.                                                                    |
| scf26327.26.63_55-S | 0.87                | 1.04              | 1.10               | 0.73                  | 1.13                | 1.03                 | -0.24               | 0.12              | -0.20              | Sac3h1        | XM_132230.3  |                                                                                                                                                   |
| scf25600.3.1_25-S   | 1.00                | 1.05              | 1.08               | 0.80                  | 1.01                | 0.94                 | -0.15               | -0.06             | -0.20              | 061009Q03Rik  | NM_026660.2  | Mus musculus RIKEN cDNA 061009Q03 gene (061009Q03Rik) mRNA.                                                                                       |
| scf0001189.1_40-S   | 1.23                | 0.92              | 0.98               | 1.25                  | 1.03                | 0.95                 | -0.20               | 0.15              | -0.20              | Porc3         | NM_173036.1  | Mus musculus paroxonase 3 (Porc3) mRNA.                                                                                                           |
| scf0011988.2_67-S   | 1.34                | 1.23              | 1.08               | 0.93                  | 0.85                | 0.95                 | -0.51               | -0.56             | -0.20              | Sic7a2        | NM_007514.1  | Mus musculus solute carrier family 7 (cationic amino acid transporter y+ system) member 2 (Sic7a2) mRNA.                                          |
| scf45380.27_223-S   | 0.93                | 1.05              | 1.18               | 0.76                  | 0.99                | 1.02                 | -0.28               | -0.09             | -0.20              | Cask          | NM_009806.1  | Mus musculus calcium/calmodulin-dependent serine protein kinase (Cask) mRNA.                                                                      |
| scf25603.5.1_159-S  | 1.15                | 1.12              | 1.09               | 0.81                  | 0.92                | 0.95                 | -0.51               | -0.29             | -0.21              | Chd7          | XM_149413.3  |                                                                                                                                                   |
| scf00230257.2_191-S | 1.18                | 1.06              | 1.06               | 0.97                  | 0.90                | 0.92                 | -0.29               | -0.23             | -0.21              | Rod1          | NM_144904.1  | Mus musculus ROD1 regulator of differentiation 1 (S. pombe) (Rod1) mRNA.                                                                          |
| scf0017222.2_194-S  | 0.95                | 1.16              | 1.11               | 0.72                  | 1.01                | 0.96                 | -0.40               | -0.21             | -0.21              | Anapc1        | NM_008569.1  | Mus musculus anaphase promoting complex subunit 1 (Anapc1) mRNA.                                                                                  |
| scf35765.18_440-S   | 1.12                | 0.89              | 1.11               | 0.92                  | 0.96                | 0.96                 | -0.29               | -0.06             | -0.21              | Bes4          | NM_026325.2  | Mus musculus Barstar-Bes4 syndrome 4 homolog (human) (Bes4) mRNA.                                                                                 |
| scf74548.2_261-S    | 0.92                | 1.10              | 1.08               | 0.85                  | 1.02                | 0.95                 | -0.20               | 0.13              | -0.21              | G130404D08Rik | NM_028682.2  | Mus musculus RIKEN cDNA 9130404D08 gene (9130404D08Rik) mRNA.                                                                                     |
| scf0066142.1_255-S  | 1.19                | 0.92              | 0.90               | 1.14                  | 1.01                | 0.77                 | -0.06               | 0.15              | -0.22              | Cox7b         | NM_025379.1  | Mus musculus cytochrome c oxidase subunit VIIb (Cox7b) mRNA.                                                                                      |
| scf40612.43.1_21-S  | 0.97                | 1.03              | 1.11               | 0.80                  | 1.00                | 0.96                 | -0.27               | -0.05             | -0.22              | Tbod          |              |                                                                                                                                                   |
| scf00244416.2_151-S | 0.88                | 0.80              | 2.19               | 0.72                  | 2.24                | 1.78                 | -0.28               | 1.45              | -0.22              | Ppp13b        | NM_177741.2  | Mus musculus protein phosphatase 1 regulatory (inhibitor) subunit 3B (Ppp13b) mRNA.                                                               |
| scf070827.2_21-S    | 0.95                | 1.15              | 1.11               | 0.75                  | 0.97                | 0.95                 | -0.33               | -0.26             | -0.22              | Als2c3        | NM_172406.2  | Mus musculus amyotrophic lateral sclerosis 2 (juvenile) chromosome region candidate 3 homolog(human) (Als2c3) mRNA.                               |
| scf50147.4_283-S    | 0.79                | 1.02              | 1.16               | 0.61                  | 1.57                | 0.99                 | -0.37               | 0.60              | -0.22              | Dusp1         | NM_013642.1  | Mus musculus dual specificity phosphatase 1 (Dusp1) mRNA.                                                                                         |
| scf03562.12.1_13-S  | 1.25                | 0.81              | 0.96               | 1.10                  | 1.10                | 0.82                 | -0.18               | 0.44              | -0.23              | Uros          | NM_009479.1  | Mus musculus uroporphyrinogen III synthase (Uros) mRNA.                                                                                           |
| scf027419.6_267-S   | 1.04                | 1.12              | 1.07               | 0.85                  | 0.86                | 0.92                 | -0.27               | -0.23             | -0.23              | Naglu         | NM_013792.1  | Mus musculus alpha-N-acetylglucosaminidase (Sanfilippo disease IIIB) (Naglu) mRNA.                                                                |
| scf69601.7_240-S    | 1.10                | 1.06              | 0.98               | 0.92                  | 0.91                | 0.84                 | -0.26               | -0.23             | -0.23              | Dab2ip        | NM_001001602 | Mus musculus disabled homolog 2 (Drosophila) interacting protein (Dab2ip) mRNA.                                                                   |
| scf36548.17_86-S    | 0.75                | 1.10              | 1.19               | 0.65                  | 1.05                | 1.01                 | -0.19               | -0.06             | -0.24              | Ryk           | NM_013649.2  | Mus musculus receptor-like tyrosine kinase (Ryk) mRNA.                                                                                            |
| scf27388.28_359-S   | 0.95                | 1.09              | 1.18               | 0.75                  | 0.98                | 1.01                 | -0.34               | -0.17             | -0.24              | Ube3b         | NM_054093.1  | Mus musculus ubiquitin protein ligase E3B (Ube3b) mRNA.                                                                                           |
| scf50565.20_286-S   | 0.96                | 1.16              | 1.13               | 0.76                  | 0.88                | 0.96                 | -0.35               | -0.40             | -0.24              | Man2a1        | NM_008549.1  | Mus musculus mannosidase 2 alpha 1 (Man2a1) mRNA.                                                                                                 |
| scf0066989.1_296-S  | 1.05                | 1.13              | 1.09               | 0.84                  | 0.88                | 0.93                 | -0.32               | -0.35             | -0.24              | 2410004N11Rik | NM_025888.2  | Mus musculus RIKEN cDNA 2410004N11 gene (2410004N11Rik) mRNA.                                                                                     |
| scf47648.13.1_3-S   | 0.92                | 1.03              | 1.21               | 0.82                  | 1.05                | 1.02                 | -0.16               | 0.03              | -0.24              | AW124722      | XM_139515.3  |                                                                                                                                                   |
| scf47204.11.1_33-S  | 1.05                | 1.05              | 1.08               | 0.84                  | 0.92                | 0.91                 | -0.32               | -0.21             | -0.25              | Eat1          | NM_010162.1  | Mus musculus exostosin (multiple) 1 (Eat1) mRNA.                                                                                                  |
| scf54735.22_173-S   | 1.12                | 1.11              | 1.02               | 0.87                  | 0.95                | 0.87                 | -0.36               | -0.23             | -0.25              | Ogt           | NM_139144.2  | Mus musculus O-linked N-acetylglucosamine (GlcNAc) transferase (UDP-N-acetylglucosamine polypeptide N-acetylglucosaminyl transferase) (Ogt) mRNA. |
| scf0002744.1_1-S    | 0.91                | 1.08              | 1.10               | 0.75                  | 0.97                | 0.92                 | -0.27               | -0.16             | -0.26              | Zfy9e         | XM_131643.4  |                                                                                                                                                   |
| scf000949.1_9-S     | 1.15                | 0.98              | 1.18               | 0.69                  | 1.04                | 0.99                 | -0.74               | 0.08              | -0.26              | Fn1           | XM_129845.3  | Mus musculus fibronectin 1 (Fn1) mRNA.                                                                                                            |
| scf0015183.2_163-S  | 1.05                | 1.10              | 1.04               | 0.87                  | 1.05                | 0.87                 | -0.27               | -0.07             | -0.27              | Hdac3         | NM_010411.1  | Mus musculus histone deacetylase 3 (Hdac3) mRNA.                                                                                                  |
| scf00224826.1_101-S | 1.05                | 1.05              | 1.09               | 0.89                  | 0.97                | 0.91                 | -0.24               | -0.11             | -0.27              | E130209G04Rik | XM_358323.1  | Mus musculus RIKEN cDNA E130209G04 gene (E130209G04Rik) mRNA.                                                                                     |
| scf39322.7.11_5-S   | 0.85                | 0.95              | 1.13               | 0.81                  | 1.07                | 0.95                 | -0.05               | 0.18              | -0.27              | Galk1         | NM_016905.1  | Mus musculus galactokinase 1 (Galk1) mRNA.                                                                                                        |
| scf36601.18.1_52-S  | 0.97                | 1.06              | 1.11               | 0.76                  | 0.96                | 0.93                 | -0.34               | -0.15             | -0.27              | Ab            | XM_356175.1  |                                                                                                                                                   |
| scf17393.13.1_260-S | 0.92                | 1.00              | 1.20               | 0.75                  | 1.02                | 0.99                 | -0.24               | 0.03              | -0.27              | F13b          | NM_031164    | Mus musculus coagulation factor XIII beta subunit (F13b) mRNA.                                                                                    |
| scf35560.5_28-S     | 1.09                | 1.01              | 1.07               | 0.87                  | 0.99                | 0.88                 | -0.34               | -0.04             | -0.27              | Cox7a2        | NM_009945.2  | Mus musculus cytochrome c oxidase subunit VIIa 2 (Cox7a2) mRNA.                                                                                   |
| scf0014528.1_45-S   | 0.88                | 1.16              | 1.27               | 0.73                  | 1.00                | 1.06                 | -0.26               | -0.22             | -0.29              | Gch1          | NM_008102.2  |                                                                                                                                                   |
| scf000756.1_295-S   | 1.05                | 1.19              | 1.08               | 0.79                  | 0.93                | 0.90                 | -0.41               | -0.37             | -0.30              | Dst           | NM_133833.1  | Mus musculus dystonin (Dst) mRNA.                                                                                                                 |
| scf0053413.2_143-S  | 0.95                | 1.04              | 1.17               | 0.81                  | 1.00                | 0.96                 | -0.22               | -0.06             | -0.30              | Exoc7         | NM_016857.1  | Mus musculus exocyst complex component 7 (Exoc7) mRNA.                                                                                            |
| scf0224742.1_82-S   | 0.92                | 1.15              | 1.22               | 0.76                  | 1.08                | 0.98                 | -0.28               | -0.10             | -0.31              | Abcd1         | NM_013854.1  | Mus musculus ATP-binding cassette sub-family F (Gcn20) member 1 (Abcd1) mRNA.                                                                     |
| scf0230917.2_257-S  | 1.10                | 1.02              | 1.06               | 0.92                  | 0.90                | 0.85                 | -0.25               | -0.19             | -0.31              | AV028368      | NM_171672.2  | Mus musculus expressed sequence AV028368 (AV028368) mRNA.                                                                                         |
| scf0070503.2_198-S  | 1.10                | 1.02              | 1.11               | 0.87                  | 0.94                | 0.89                 | -0.33               | -0.13             | -0.33              | 5730402C02Rik | NM_027442.3  |                                                                                                                                                   |
| scf41687.5_165-S    | 1.14                | 1.00              | 1.11               | 0.90                  | 1.07                | 0.87                 | -0.34               | 0.10              | -0.34              | D11Erd603e    | NM_026023.3  | Mus musculus DNA segment Chr 11 ERATO Dcl 603 expressed (D11Erd603e) mRNA.                                                                        |
| scf0269549.2_19-S   | 0.86                | 1.19              | 1.32               | 0.69                  | 1.04                | 1.04                 | -0.33               | -0.21             | -0.35              | E030026H10Rik | NM_175553.2  | Mus musculus RIKEN cDNA E030026H10 gene (E030026H10Rik) mRNA.                                                                                     |
| scf00105171.1_137-S | 1.33                | 1.27              | 1.11               | 0.77                  | 0.67                | 0.88                 | -0.84               | -0.94             | -0.35              | Arrdc3        | NM_178917.2  | Mus musculus arrestin domain containing 3 (Arrdc3) mRNA.                                                                                          |
| scf0020393.12_71-S  | 0.97                | 1.14              | 1.14               | 0.99                  | 1.47                | 0.89                 | 0.02                | 0.36              | -0.35              | Sgk           | NM_011361.1  | Mus musculus serum/glucocorticoid regulated kinase (Sgk) mRNA.                                                                                    |
| scf50172.5.1_49-S   | 0.73                | 1.05              | 1.21               | 0.70                  | 1.20                | 0.95                 | -0.04               | 0.19              | -0.35              | 9530058B02Rik | NM_026633.1  | Mus musculus RIKEN cDNA 9530058B02 gene (9530058B02Rik) mRNA.                                                                                     |
| scf22519.12.1_40-S  | 0.96                | 1.15              | 1.20               | 0.77                  | 0.96                | 0.94                 | -0.30               | -0.24             | -0.37              | 9830147J24Rik | NM_145454.2  | Mus musculus RIKEN cDNA 9830147J24 gene (9830147J24Rik) mRNA.                                                                                     |
| scf20555.7.24_72-S  | 1.35                | 0.93              | 0.99               | 1.13                  | 0.85                | 0.82                 | -0.25               | -0.14             | -0.41              | Mmp19         | NM_019735.2  | Mus musculus RIKEN cDNA 9830147J24 gene (9830147J24Rik) mRNA.                                                                                     |
| scf42564.18.1_22-S  | 0.91                | 1.13              | 1.30               | 0.72                  | 0.99                | 0.92                 | -0.33               | -0.18             | -0.51              | Sntg2         | NM_172951.1  | Mus musculus syntrophin gamma 2 (Sntg2) mRNA.                                                                                                     |
| scf0320204.2_97-S   | 1.48                | 0.62              | 1.08               | 1.43                  | 0.95                | 0.63                 | -0.05               | 0.60              | -0.75              | 4833442J19Rik | NM_177101.2  | Mus musculus RIKEN cDNA 4833442J19 gene (4833442J19Rik) mRNA.                                                                                     |

| Gene Name           | D                |                |                 |                    |                  |                   |                  |                |                 |                | Symbol          | Accession                                                                                                 | Description |
|---------------------|------------------|----------------|-----------------|--------------------|------------------|-------------------|------------------|----------------|-----------------|----------------|-----------------|-----------------------------------------------------------------------------------------------------------|-------------|
|                     | Control 16 Hours | Control 1 Week | Control 4 Weeks | Treatment 18 Hours | Treatment 1 Week | Treatment 4 Weeks | Log2 FC 18 Hours | Log2 FC 1 Week | Log2 FC 4 Weeks |                |                 |                                                                                                           |             |
| scd019700.2_46-S    | 1.45             | 0.98           | 1.08            | 1.26               | 0.29             | 0.02              | -0.21            | -3.67          | -5.51           | Ram1           | NM_009047.4     | Mus musculus rad and gem related GTP binding protein 1 (Ram1) mRNA                                        |             |
| scd17359.5_60-S     | 1.01             | 6.28           | 3.40            | 1.24               | 0.36             | 1.07              | 0.28             | -4.21          | -1.98           | Rgs16          | NM_011267.1     | Mus musculus regulator of G-protein signaling 16 (Rgs16) mRNA                                             |             |
| scd37045.17_33-S    | 1.17             | 1.69           | 2.04            | 1.04               | 0.62             | 0.62              | -0.10            | -1.39          | -1.84           | Usp2           | NM_198091.1     | Mus musculus ubiquitin specific protease 2 (Usp2) transcript variant 2 mRNA                               |             |
| scd07684.7_194-S    | 0.96             | 1.16           | 1.18            | 0.98               | 0.35             | 0.45              | 0.11             | -1.79          | -1.81           | Upp2           | NM_029692.1     | Mus musculus uridine phosphorylase 2 (Upp2) mRNA                                                          |             |
| scd074182.2_93-S    | 1.71             | 1.62           | 1.49            | 0.97               | 0.43             | 0.53              | -0.73            | -1.85          | -1.70           | 2310032D16Rik  | NM_027096.1     | Mus musculus RIKEN cDNA 2310032D16 gene (2310032D16Rik) mRNA                                              |             |
| scd071728.1_42-S    | 0.63             | 2.77           | 3.27            | 0.77               | 0.93             | 1.24              | 0.30             | -1.54          | -1.57           | 2310032D16Rik  | NM_027096.1     | Mus musculus peroxisomal acyl-CoA oxidase 2A (Pxa2a) mRNA                                                 |             |
| scd17326.1_256-S    | 0.92             | 1.37           | 1.40            | 1.23               | 0.40             | 0.73              | 0.10             | -1.43          | -1.63           | Pcsk4          | NM_008793.1     | Mus musculus proprotein convertase subtilisin/kexin type 4 (Pcsk4) mRNA                                   |             |
| scd0113087.1_70-S   | 0.86             | 1.97           | 2.37            | 0.89               | 0.85             | 0.96              | 0.15             | -1.23          | -1.43           | Cyp2a5         | NM_007812.1     | Mus musculus cytochrome P450 family 2 subfamily a polypeptide 5 (Cyp2a5) mRNA                             |             |
| scd00023.1_1-S      | 0.89             | 1.92           | 2.32            | 0.82               | 0.83             | 1.00              | -0.01            | -1.26          | -1.13           | Cyp2a5         | NM_007812.1     | Mus musculus cytochrome P450 family 2 subfamily a polypeptide 5 (Cyp2a5) mRNA                             |             |
| scd18984.16_308-S   | 1.20             | 1.20           | 1.39            | 1.08               | 0.68             | 0.60              | -0.13            | -0.80          | -1.26           | Por            | NM_008986.1     | Mus musculus P450 (cytochrome) oxidoreductase (Por) mRNA                                                  |             |
| scd013008.2_75-S    | 0.90             | 1.79           | 1.96            | 0.86               | 0.82             | 0.92              | 0.04             | -1.17          | -1.24           | Cyp2a5         | NM_007812.1     | Mus musculus cytochrome P450 family 2 subfamily a polypeptide 5 (Cyp2a5) mRNA                             |             |
| scd0177483.1_45-S   | 2.87             | 1.38           | 1.41            | 2.68               | 0.18             | 0.21              | -0.10            | -3.08          | -1.21           | Mt1            | NM_013602.2     | Mus musculus metallothionein I (Mt1) mRNA                                                                 |             |
| scd43302.13_117-S   | 1.98             | 1.26           | 1.09            | 1.73               | 0.58             | 0.73              | 0.00             | -1.16          | -1.10           | Pbe1f          | NM_015234.1     | Mus musculus pre-B-cell colony-enhancing factor 1 (Pbe1f) mRNA                                            |             |
| scd003763.1_0-S     | 0.81             | 1.37           | 1.41            | 0.93               | 0.47             | 0.70              | 0.25             | -1.53          | -1.10           | Pcsk4          | NM_008793.1     | Mus musculus proprotein convertase subtilisin/kexin type 4 (Pcsk4) mRNA                                   |             |
| scd53305.8.1_17-S   | 0.95             | 1.26           | 1.68            | 0.98               | 0.85             | 0.83              | 0.04             | -0.58          | -1.07           | BC016495       | NM_145497.1     | Mus musculus cDNA sequence BC016495 (BC016495) mRNA                                                       |             |
| scd39362.7.1_196-S  | 0.97             | 1.66           | 1.96            | 0.84               | 0.81             | 0.97              | -0.20            | -1.04          | -1.05           | D11Erd636e     | NM_029794.1     | Mus musculus DNA segment Chr 11 ERATO D63 expressed (D11Erd636e) mRNA                                     |             |
| scd28780.8_93-S     | 0.89             | 1.69           | 1.84            | 0.76               | 0.65             | 0.90              | -0.19            | -0.77          | -1.04           | Cyp2b10        | NM_175475.2     | Mus musculus cytochrome P450 family 26 subfamily b polypeptide 1 (Cyp2b10) mRNA                           |             |
| scd3196.12_2_0-S    | 1.07             | 1.28           | 1.39            | 1.20               | 0.73             | 0.76              | 0.75             | -0.04          | -0.75           | Wee1           | NM_009516.2     | Mus musculus wee 1 homolog (S. pombe) (Wee1) mRNA                                                         |             |
| scd003961.2_83-S    | 1.17             | 1.11           | 1.14            | 1.35               | 0.61             | 0.59              | 0.21             | -0.85          | -0.94           | Nrg4           | NM_032002.1     | Mus musculus neuregulin 4 (Nrg4) mRNA                                                                     |             |
| scd00366.4_118-S    | 1.17             | 1.02           | 1.24            | 1.16               | 0.46             | 0.73              | 0.00             | -1.16          | -0.92           | Pbe1b          | NM_151333.1     | Mus musculus retinol reductase dehydrogenase 5 (Rbhd5) mRNA                                               |             |
| scd017396.1_58-S    | 1.25             | 1.71           | 1.77            | 0.89               | 0.87             | 0.91              | 0.07             | -0.87          | -0.81           | Cyp2d4         | NM_009967.1     | Mus musculus cytochrome P450 family 2 subfamily a polypeptide 4 (Cyp2d4) mRNA                             |             |
| scd011639.5_169-S   | 0.73             | 1.53           | 1.89            | 0.77               | 0.96             | 1.05              | 0.07             | -1.67          | -0.89           | Akk4           | NM_009647.1     | Mus musculus adenylate kinase 4 (Akk4) mRNA                                                               |             |
| scd0002359.1_0-S    | 1.26             | 0.97           | 1.33            | 1.17               | 0.76             | 0.73              | -0.10            | -0.35          | -0.89           | Pbe1f          | NM_015234.1     | Mus musculus pre-B-cell colony-enhancing factor 1 (Pbe1f) mRNA                                            |             |
| scd47703.8_132-S    | 0.93             | 1.36           | 1.47            | 0.85               | 0.80             | 0.92              | -0.13            | -0.77          | -0.84           | Tef            | NM_017376.2     | Mus musculus thyrotroph embryonic factor (Tef) transcript variant 2 mRNA                                  |             |
| scd0030095.1_34-S   | 1.32             | 1.32           | 1.46            | 0.92               | 0.76             | 0.83              | -0.49            | -0.74          | -0.83           | 2310032D16Rik  | NM_027096.1     | Mus musculus RIKEN cDNA 2310032D16 gene (2310032D16Rik) mRNA                                              |             |
| scd002954.1_36-S    | 1.30             | 0.92           | 1.54            | 1.57               | 0.77             | 0.89              | 0.33             | -0.27          | -0.81           | Rbm3           | NM_016809.1     | Mus musculus RNA binding motif protein 3 (Rbm3) mRNA                                                      |             |
| scd00300.10_18-S    | 0.93             | 1.10           | 1.03            | 0.74               | 0.74             | 0.74              | -0.15            | -0.15          | -0.15           | Hmgn2          | NM_013367.1     | Mus musculus nucleolar protein 2 (Hmgn2) mRNA                                                             |             |
| scd015331.1_246-S   | 1.80             | 0.95           | 1.06            | 1.47               | 0.83             | 0.63              | -0.29            | -0.18          | -0.76           | Hmgn2          | NM_016957.2     | Mus musculus high mobility group nucleosomal binding domain 2 (Hmgn2) mRNA                                |             |
| scd47630.6_103-S    | 1.02             | 1.38           | 1.31            | 0.95               | 0.83             | 0.80              | -0.10            | -0.69          | -0.73           | Pim3           | NM_145478.1     | Mus musculus progerin integration site 3 (Pim3) mRNA                                                      |             |
| scd019885.11_24-S   | 0.96             | 1.12           | 1.56            | 0.94               | 0.95             | 0.95              | -0.03            | -0.25          | -0.72           | Rorc           | NM_011281.1     | Mus musculus RAR-related orphan receptor gamma (Rorc) mRNA                                                |             |
| scd20633.35_1_246-S | 0.91             | 1.49           | 1.73            | 0.79               | 0.95             | 1.08              | -0.20            | -0.66          | -0.72           | Lrp4           | NM_172668.2     | Mus musculus low density lipoprotein receptor-related protein 4 (Lrp4) mRNA                               |             |
| scd16508.16.1_213-S | 0.94             | 1.31           | 1.52            | 0.88               | 0.91             | 0.96              | -0.05            | -0.54          | -0.69           | Ngef           | NM_019867.1     | Mus musculus neuronal guanine nucleotide exchange factor (Ngef) mRNA                                      |             |
| scd37374.51_1_3-S   | 1.11             | 1.14           | 1.60            | 0.92               | 0.64             | 0.87              | -0.26            | -0.80          | -0.69           | Hsd17b9        | NM_013786.2     | Mus musculus hydroxysteroid 17-beta dehydrogenase 5 (Hsd17b9) mRNA                                        |             |
| scd03445.46_181-S   | 0.84             | 1.31           | 1.51            | 0.94               | 0.84             | 0.84              | -0.03            | -0.49          | -0.63           | Stard5         | NM_023774.4     | Mus musculus steroid binding protein-like 5 (Stard5) mRNA                                                 |             |
| scd0243382.2_254-S  | 1.09             | 1.15           | 1.42            | 0.83               | 0.80             | 0.89              | -0.40            | -0.53          | -0.68           | AR30026L03Rik  | NM_175523.2     | Mus musculus RIKEN cDNA AR30026L03 gene (AR30026L03Rik) mRNA                                              |             |
| scd36405.1_303-S    | 0.93             | 1.28           | 1.35            | 0.88               | 0.71             | 0.90              | -0.10            | -0.85          | -0.66           | BC056629       | NM_172928.1     | Mus musculus RIKEN cDNA BC056629 gene (BC056629) mRNA                                                     |             |
| scd33493.31_90-S    | 14.11            | 1.84           | 0.35            | 15.40              | 0.14             | 0.21              | 0.11             | -3.64          | -0.65           | Mt2            | NM_008630.1     | Mus musculus metallothionein 2 (Mt2) mRNA                                                                 |             |
| scd0229473.1_11-S   | 0.96             | 1.45           | 1.60            | 0.82               | 0.81             | 1.03              | -0.21            | -0.84          | -0.65           | D930015E06Rik  | NM_172681.2     | Mus musculus RIKEN cDNA D930015E06 gene (D930015E06Rik) mRNA                                              |             |
| scd012608.3_48-S    | 0.92             | 1.16           | 1.18            | 0.91               | 1.02             | 0.76              | -0.02            | -0.29          | -0.64           | Cetpbp         | NM_009883.1     | Mus musculus CCAAT/enhancer binding protein (C/EBP) beta (Cetpbp) mRNA                                    |             |
| scd014885.1_306-S   | 1.07             | 1.29           | 1.28            | 0.97               | 0.89             | 0.83              | -0.12            | -0.42          | -0.64           | Sc374a         | NM_008063.1     | Mus musculus scutellarin carrier family 37 (glycerol-6-phosphate transporter) member 4 (Sc374a) mRNA      |             |
| scd003557.1_3-S     | 0.81             | 1.30           | 1.73            | 0.88               | 0.81             | 0.85              | -0.15            | -0.45          | -0.62           | Hmgn2          | NM_013367.1     | Mus musculus high mobility group 2 (Hmgn2) (Hmgn2) mRNA                                                   |             |
| scd27294.16.1_239-S | 1.08             | 1.36           | 1.27            | 0.93               | 0.98             | 0.84              | -0.21            | -1.19          | -1.62           | Sc24a6         | NM_133221.1     | Mus musculus scutellarin carrier family 24 (sodium/potassium/calcium exchanger) member 6 (Sc24a6) mRNA    |             |
| scd076257.1_48-S    | 0.65             | 1.40           | 1.65            | 0.48               | 0.99             | 1.16              | -0.44            | -0.51          | -0.62           | Sc38a3         | NM_023805.2     | Mus musculus scutellarin carrier family 38 (sodium/potassium/calcium exchanger) member 6 (Sc38a3) mRNA    |             |
| scd51562.3_91-S     | 0.91             | 1.02           | 1.61            | 0.91               | 0.92             | 1.05              | -0.02            | -0.16          | -0.61           | Glypc          | NM_027863.2     | Mus musculus glycyphorin C (Glypc) mRNA                                                                   |             |
| scd31028.4.1_18-S   | 1.07             | 1.27           | 1.08            | 0.99               | 0.96             | 0.73              | -0.12            | -0.41          | -0.60           | Aqp11          | NM_175105.2     | Mus musculus aquaporin 11 (Aqp11) mRNA                                                                    |             |
| scd18631.16_116-S   | 0.96             | 1.24           | 1.40            | 0.72               | 0.89             | 0.94              | -0.39            | -0.52          | -0.60           | Sc23a2         | NM_018824.2     | Mus musculus scutellarin carrier family 23 (nucleoside transporters) member 2 (Sc23a2) mRNA               |             |
| scd43425.1_1_3-S    | 0.88             | 1.13           | 1.51            | 0.91               | 1.01             | 0.99              | -0.04            | -0.08          | -0.59           | Immp2          | NM_053122.2     | Mus musculus inner mitochondrial membrane peptidase 2-like (S. cerevisiae) (Immp2) mRNA                   |             |
| scd071435.1_134-S   | 0.87             | 1.41           | 1.32            | 0.98               | 0.82             | 0.83              | -0.32            | -0.81          | -0.51           | Vcam2          | NM_139233.5     | Mus musculus vascular cell adhesion molecule 1 (Vcam2) mRNA                                               |             |
| scd022329.2_144-S   | 0.99             | 1.33           | 1.49            | 0.92               | 0.87             | 1.00              | -0.23            | -0.60          | -0.58           | Klrl3          | NM_011693.2     | Mus musculus Kluppel-like factor 3 (Klrl3) mRNA                                                           |             |
| scd31250.6.4_21-S   | 0.97             | 1.11           | 1.14            | 0.91               | 0.75             | 0.78              | -0.07            | -0.57          | -0.58           | Klrl3          | NM_021366.2     | Mus musculus Kluppel-like factor 3 (Klrl3) mRNA                                                           |             |
| scd4595.13_308-S    | 0.87             | 1.39           | 1.29            | 0.76               | 0.96             | 0.87              | -0.18            | -0.55          | -0.58           | Gab1           | NM_021356.2     | Mus musculus growth factor receptor bound protein 2-associated protein 1 (Gab1) mRNA                      |             |
| scd017347.2_7-S     | 1.02             | 1.45           | 1.13            | 0.94               | 0.73             | 0.78              | -0.10            | -0.99          | -0.58           | Mknk2          | NM_021462.2     | Mus musculus MAP kinase-interacting serine/threonine kinase 2 (Mknk2) mRNA                                |             |
| scd0232087.1_5-S    | 1.12             | 1.43           | 1.12            | 0.77               | 0.76             | 0.76              | -0.05            | -0.89          | -0.56           | Mat2a          | NM_145569.1     | Mus musculus methionine adenosyltransferase II alpha (Mat2a) mRNA                                         |             |
| scd0353187.1_56-S   | 1.11             | 1.18           | 1.08            | 0.98               | 0.67             | 0.80              | -0.17            | -0.83          | -0.54           | Nr1d2          | NM_011584.2     | Mus musculus nuclear receptor subfamily 1 group D member 2 (Nr1d2) mRNA                                   |             |
| scd023680.13_149-S  | 0.86             | 1.10           | 1.13            | 0.87               | 1.06             | 0.87              | -0.13            | -0.41          | -0.53           | 110007F05Rik   | NM_011007F05Rik | Mus musculus RIKEN cDNA 110007F05 gene (110007F05Rik) mRNA                                                |             |
| scd27378.6.1_149-S  | 1.10             | 0.93           | 1.11            | 1.13               | 0.89             | 0.77              | 0.03             | -0.06          | -0.54           | 110007F05Rik   | NM_011007F05Rik | Mus musculus RIKEN cDNA 110007F05 gene (110007F05Rik) mRNA                                                |             |
| scd067153.8_8-S     | 1.01             | 0.92           | 1.16            | 1.09               | 0.89             | 0.80              | 0.11             | -0.99          | -0.53           | 2610207P08Rik  | NM_127746.2     | Mus musculus RIKEN cDNA 2610207P08 gene (2610207P08Rik) mRNA                                              |             |
| scd00170460.2_242-S | 0.91             | 1.25           | 1.47            | 0.85               | 0.93             | 1.03              | -0.08            | -0.42          | -0.53           | Stard5         | NM_023774.4     | Mus musculus STAR-related lipid transfer (START) domain containing 5 (Stard5) mRNA                        |             |
| scd0230789.1_243-S  | 1.06             | 1.23           | 1.17            | 0.95               | 0.90             | 0.82              | -0.14            | -0.45          | -0.53           | BC008163       | NM_145553.1     | Mus musculus cDNA sequence BC008163 (BC008163) mRNA                                                       |             |
| scd43073.2_370-S    | 0.99             | 1.22           | 1.30            | 0.98               | 0.96             | 0.90              | -0.01            | -0.34          | -0.52           | Hspa2          | NM_008301.2     | Mus musculus heat shock protein 2 (Hspa2) mRNA                                                            |             |
| scd29761.63_475-S   | 1.01             | 1.21           | 1.32            | 0.84               | 0.98             | 0.93              | -0.27            | -0.31          | -0.51           | Itpr1          | NM_010585.2     | Mus musculus inositol 1,4,5-trisphosphate receptor 1 (Itpr1) mRNA                                         |             |
| scd31653.1_148-S    | 1.05             | 1.18           | 1.28            | 0.98               | 0.85             | 0.85              | -0.03            | -0.41          | -0.42           | 18108363B05Rik | NM_145885.1     | Mus musculus RIKEN cDNA 18108363B05 gene (18108363B05Rik) mRNA                                            |             |
| scd018623.1_194-S   | 1.12             | 1.16           | 1.20            | 0.90               | 0.81             | 0.86              | -0.30            | -0.54          | -0.50           | Ltk            | NM_00507.2      | Mus musculus linker of T-cell receptor pathways (Ltk) mRNA                                                |             |
| scd0104175.6_273-S  | 0.98             | 1.51           | 1.50            | 0.85               | 0.75             | 1.12              | -0.22            | -1.02          | -1.05           | Sik1           | NM_145587.1     | Mus musculus SH3-binding kinase (Sik1) mRNA                                                               |             |
| scd0140904.2_248-S  | 0.78             | 1.04           | 1.34            | 0.85               | 1.07             | 0.95              | 0.11             | 0.05           | -0.49           | Caln1          | NM_021371.1     | Mus musculus calnexin 1 (Caln1) mRNA                                                                      |             |
| scd36349.9.1_1-S    | 1.09             | 1.08           | 1.21            | 1.06               | 0.79             | 0.86              | -0.04            | -0.44          | -0.49           | Acrv2b         | NM_007397.1     | Mus musculus activin receptor 1B (Acrv2b) mRNA                                                            |             |
| scd47678.5.1_248-S  | 0.98             | 1.37           | 1.37            | 1.02               | 0.86             | 0.99              | 0.05             | -0.64          | -0.48           | Bklk           | NM_007546.1     | Mus musculus Bcl2-interacting lipid kinase (Bklk) mRNA                                                    |             |
| scd18986.12_141-S   | 1.02             | 1.09           | 1.37            | 0.81               | 0.81             | 1.00              | -0.32            | -0.42          | -0.47           | Cryz2          | NM_00963.3      | Mus musculus cryptochrome 2 (photolyase-like) (Cryz2) mRNA                                                |             |
| scd0030376.1_19-S   | 0.80             | 1.22           | 1.13            | 0.82               | 0.80             | 0.80              | -0.14            | -0.42          | -0.40           | Itpr1          | NM_010585.2     | Mus musculus inositol 1,4,5-trisphosphate receptor alpha chain 1 (Itpr1) mRNA                             |             |
| scd25052.6.1_35-S   | 1.06             | 0.86           | 1.21            | 1.19               | 0.87             | 0.88              | 0.16             | -0.02          | -0.46           | 110038M16Rik   | NM_026837.2     | Mus musculus RIKEN cDNA 110038M16 gene (110038M16Rik) mRNA                                                |             |
| scd006468.2_148-S   | 0.96             | 0.64           | 1.28            | 0.80               | 0.84             | 0.96              | -0.24            | -0.97          | -0.46           | Lpn2           | NM_002882.2     | Mus musculus lipin 2 (Lpn2) mRNA                                                                          |             |
| scd33570.4.1_25-S   | 0.98             | 1.14           | 1.21            | 0.96               | 0.92             | 0.88              | -0.03            | -0.32          | -0.46           | Klrl1          | NM_010635       | Mus musculus Kluppel-like factor 1 (eynhoi) (Klrl1) mRNA                                                  |             |
| scd39299.4_652-S    | 0.95             | 1.27           | 1.41            | 0.90               | 0.92             | 1.03              | 0.06             | -0.47          | -0.46           | Cygb           | NM_030206.1     | Mus musculus cytoglobin (Cygb) mRNA                                                                       |             |
| scd005798.2_33-S    | 1.02             | 1.22           | 1.20            | 0.88               | 0.89             | 0.89              | -0.30            | -0.61          | -0.45           | Gne            | NM_015828.2     | Mus musculus glucosamine (Gne) mRNA                                                                       |             |
| scd42451.6.1_126-S  | 1.18             | 1.26           | 0.98            | 1.14               | 0.77             | 0.77              | 0.02             | -0.71          | -0.45           | Nrkba          | NM_010907       | Mus musculus nuclear receptor of kappa ligand chain gene enhancer in B-cells inhibitor alpha (Nrkba) mRNA |             |
| scd43301.1_182-S    | 1.12             | 1.06           | 1.12            | 0.98               | 0.84             | 0.84              | -0.12            | -0.42          | -0.41           | Casv7          | NM_010368.1     | Mus musculus ganglioside-induced differentiation associated protein 10 (Gdap10) mRNA                      |             |
| scd18503.5_29-S     | 0.99             | 1.39           | 1.11            | 1.02               | 0.49             | 0.84              | 0.04             | -1.51          | -0.45           | Trc3           | NM_144554.1     | Mus musculus carboxylesterase 3 (Ces3) mRNA                                                               |             |
| scd34490.14.1_30-S  | 0.34             | 1.01           | 1.44            | 0.85               | 1.04             | 1.14              | 0.35             | 0.17           | -0.44           | Ces3           | NM_053200.1     | Mus musculus carboxylesterase 3 (Ces3) mRNA                                                               |             |
| scd0020237.1_3-S    | 1.00             | 1.21           | 1.48            | 0.92               | 0.92             | 1.11              | -0.13            | -0.37          | -0.             |                |                 |                                                                                                           |             |

| Gene Name           | Control<br>18 Hours | Control<br>1 Week | Control<br>4 Weeks | Treatment<br>18 Hours | Treatment<br>1 Week | Treatment<br>4 Weeks | Log2 FC<br>18 Hours | Log2 FC<br>1 Week | Log2 FC<br>4 Weeks | Symbol         | Accession   | Definition                                                                                                 |
|---------------------|---------------------|-------------------|--------------------|-----------------------|---------------------|----------------------|---------------------|-------------------|--------------------|----------------|-------------|------------------------------------------------------------------------------------------------------------|
| sc0003766.1 1206-S  | 0.99                | 1.33              | 1.24               | 0.90                  | 0.87                | 0.98                 | -0.13               | -0.60             | -0.38              | Mknk2          | NM_021462   | Mus musculus MAP kinase-interacting serine/threonine kinase 2 (Mknk2) mRNA.                                |
| sc0006837.1 136-S   | 0.96                | 1.15              | 1.23               | 0.85                  | 0.96                | 0.95                 | -0.17               | -0.26             | -0.38              | 0610038K03Rik  | NM_026701.2 | Mus musculus RIKEN cDNA 0610038K03 gene (0610038K03Rik) mRNA.                                              |
| sc022666.6 141-S    | 1.01                | 1.07              | 1.10               | 0.96                  | 0.87                | 0.86                 | -0.08               | -0.30             | -0.38              | Zfp161         | NM_009547.2 | Mus musculus zinc finger protein 161 (Zfp161) mRNA.                                                        |
| sc023992.2 133-S    | 1.07                | 1.03              | 0.99               | 1.10                  | 1.02                | 0.76                 | 0.05                | -0.33             | -0.38              | Cdkn2c         | NM_007671.2 | Mus musculus cyclin-dependent kinase inhibitor 2C (p18 inhibits CDK4) (Cdkn2c) mRNA.                       |
| sc030652.3 263-S    | 1.01                | 1.17              | 1.11               | 0.99                  | 0.93                | 0.85                 | -0.13               | -0.58             | -0.38              | 02410015N17Rik | NM_023931.1 | Mus musculus RIKEN cDNA 02410015N17 gene (2410015N17Rik) mRNA.                                             |
| sc000059.1 14-S     | 0.50                | 1.09              | 1.32               | 0.61                  | 1.10                | 1.01                 | 0.29                | 0.01              | -0.37              | Nr13           | NM_029803.1 | Mus musculus nuclear receptor subfamily 1 group 1 member 3 (Nr13) mRNA.                                    |
| sc052120.1 108-S    | 1.11                | 1.00              | 1.15               | 0.97                  | 0.91                | 0.89                 | -0.20               | -0.15             | -0.37              | D8Ertd354e     | NM_133970   | Mus musculus DNA segment Chr 8 ERATO Dci 354 expressed (D8Ertd354e) mRNA.                                  |
| sc0020979.2 107-S   | 0.99                | 1.25              | 1.14               | 0.81                  | 0.90                | 0.90                 | -0.27               | -0.47             | -0.37              | Syt1           | NM_009306.2 | Mus musculus synaptotagmin 1 (Syt1) mRNA.                                                                  |
| sc021260.7 101-S    | 0.93                | 1.14              | 1.19               | 0.78                  | 0.94                | 0.93                 | -0.24               | -0.27             | -0.37              | Arl8           | NM_029466.2 | Mus musculus ADP-ribosylation factor-like 8 (Arl8) mRNA.                                                   |
| sc0003894.1 174-S   | 1.01                | 1.11              | 1.09               | 0.99                  | 0.79                | 0.85                 | -0.01               | -0.50             | -0.37              | Amid           | NM_153779.1 | Mus musculus apoptosis-inducing factor (AIF)-like mitochondrial-associated inducer of death (Amid) mRNA.   |
| sc00017134.1 226-S  | 1.10                | 1.17              | 1.14               | 0.89                  | 0.91                | 0.88                 | -0.29               | -0.38             | -0.37              | Malg           | NM_010756.3 | Mus musculus v-maf musculoaponeurotic fibrosarcoma oncogene family protein G (avian) (Malg) mRNA.          |
| sc0014528.1 141-S   | 1.00                | 1.17              | 1.11               | 0.97                  | 0.91                | 0.81                 | -0.11               | -0.23             | -0.37              | Gcn1           | NM_023932.2 | Mus musculus v-maf musculoaponeurotic fibrosarcoma oncogene family protein G (avian) (Gcn1) mRNA.          |
| sc018606.1 11-S     | 0.89                | 1.15              | 1.44               | 0.72                  | 0.87                | 1.12                 | -0.26               | -0.41             | -0.37              | Enpp2          | NM_015744   | Mus musculus ectonucleotide pyrophosphatase/phosphodiesterase 2 (Enpp2) mRNA.                              |
| sc006693.3 28-S     | 1.02                | 1.09              | 0.98               | 1.00                  | 0.74                | 0.77                 | -0.02               | -0.57             | -0.37              | 1700023B02Rik  | NM_025854.1 | Mus musculus RIKEN cDNA 1700023B02 gene (1700023B02Rik) mRNA.                                              |
| sc0106597.1 314-S   | 1.08                | 1.17              | 1.03               | 0.99                  | 0.90                | 0.80                 | -0.13               | -0.38             | -0.36              | AI461933       | XM_128813.3 | Mus musculus expressed sequence AI461933 (AI461933) mRNA.                                                  |
| sc015024.2 236-S    | 1.20                | 0.99              | 1.05               | 1.09                  | 0.90                | 0.82                 | -0.14               | -0.12             | -0.36              | H2-T10         | NM_010395.2 | Mus musculus histocompatibility 2 T region locus 10 (H2-T10) mRNA.                                         |
| sc032642.3 586-S    | 1.09                | 1.35              | 1.10               | 1.05                  | 0.85                | 0.86                 | -0.05               | -0.67             | -0.36              | 18100540C13Rik | NM_026436.1 | Mus musculus RIKEN cDNA 18100540C13 gene (18100540C13Rik) mRNA.                                            |
| sc045038.2 639-S    | 1.06                | 1.10              | 1.18               | 0.93                  | 0.96                | 0.92                 | -0.18               | -0.19             | -0.36              | 2810021B07Rik  | NM_025479.2 | Mus musculus RIKEN cDNA 2810021B07 gene (2810021B07Rik) mRNA.                                              |
| sc000215160.1 38-S  | 1.06                | 0.99              | 1.18               | 0.98                  | 0.93                | 0.92                 | -0.12               | -0.10             | -0.36              | Rhnd7          | NM_146902.1 | Mus musculus Rhnd7 mRNA.                                                                                   |
| sc016362.2 0-S      | 1.03                | 1.07              | 1.09               | 0.89                  | 0.92                | 0.86                 | -0.20               | -0.21             | -0.36              | Itch           | NM_192925.3 | Mus musculus Itchy (Itch) mRNA.                                                                            |
| sc041376.4 28-S     | 0.99                | 1.14              | 1.18               | 0.87                  | 0.93                | 0.92                 | -0.17               | -0.31             | -0.35              | Vamp2          | NM_009497.2 | Mus musculus vesicle-associated membrane protein 2 (Vamp2) mRNA.                                           |
| sc0079235.2 137-S   | 0.97                | 1.16              | 1.24               | 0.87                  | 1.00                | 0.98                 | -0.16               | -0.21             | -0.35              | Lrat           | NM_023624.1 | Mus musculus lecithin-retinol acyltransferase (phosphatidylcholine-retinol-O-acyltransferase) (Lrat) mRNA. |
| sc076073.9 113-S    | 1.01                | 1.15              | 1.10               | 0.96                  | 0.92                | 0.87                 | -0.06               | -0.33             | -0.33              | 0610009F02Rik  | NM_029508.1 | Mus musculus RIKEN cDNA 0610009F02 gene (0610009F02Rik) mRNA.                                              |
| sc0003424.1 2300-S  | 0.89                | 1.22              | 1.13               | 0.76                  | 0.98                | 0.90                 | -0.22               | -0.32             | -0.33              | Tgfbir2        | NM_009371.2 | Mus musculus transforming growth factor beta receptor 1 (Tgfbir2) transcript variant 1 mRNA.               |
| sc040050.12 410-S   | 0.85                | 1.35              | 1.34               | 0.82                  | 1.03                | 1.07                 | -0.05               | -0.40             | -0.33              | Ndel1          | NM_023668.1 | Mus musculus nuclear distribution gene E-like homolog 1 (A. nidulans) (Ndel1) mRNA.                        |
| sc028963.131 27-S   | 0.80                | 1.22              | 1.27               | 0.83                  | 0.88                | 1.02                 | -0.06               | -0.32             | -0.33              | BC020002       | NM_028005.1 | Mus musculus 5-nucleotidase cytosolic III (N5C3) mRNA.                                                     |
| sc044322.14.1 14-S  | 0.97                | 1.24              | 1.19               | 0.82                  | 0.90                | 0.95                 | -0.24               | -0.58             | -0.33              | 4833420G17Rik  | NM_026127.3 | Mus musculus RIKEN cDNA 4833420G17 gene (4833420G17Rik) mRNA.                                              |
| sc0066853.2 236-S   | 0.98                | 1.54              | 1.17               | 0.86                  | 0.86                | 0.94                 | -0.17               | -0.80             | -0.33              | Phla2          | NM_025802.1 | Mus musculus RIKEN cDNA 4833420G17 gene (4833420G17Rik) mRNA.                                              |
| sc0104871.12 180-S  | 1.04                | 1.08              | 1.09               | 1.02                  | 0.83                | 0.87                 | -0.04               | -0.38             | -0.33              | AI661438       | NM_178914.3 | Mus musculus RIKEN cDNA 9130022K13 gene (9130022K13Rik) mRNA.                                              |
| sc047016.7 165-S    | 0.79                | 1.08              | 1.23               | 0.81                  | 1.15                | 0.98                 | 0.06                | 0.08              | -0.32              | 9130022K13Rik  | XM_203652.2 | Mus musculus RIKEN cDNA 9130022K13 gene (9130022K13Rik) mRNA.                                              |
| sc0013640.1 290-S   | 0.88                | 1.07              | 1.23               | 0.78                  | 0.93                | 0.99                 | -0.18               | -0.22             | -0.32              | Efnas          | NM_027654.1 | Mus musculus ephrin A5 (Efnas) transcript variant 2 mRNA.                                                  |
| sc0022727.1 0-S     | 0.91                | 1.38              | 1.29               | 0.85                  | 1.04                | 1.04                 | -0.10               | -0.42             | -0.32              | C430010P07Rik  | NM_177645.2 | Mus musculus C430010P07Rik mRNA.                                                                           |
| sc0076454.1 17-S    | 1.29                | 0.94              | 0.94               | 0.89                  | 0.67                | 0.76                 | -0.03               | -0.64             | -0.32              | Fbw3           | NM_133765.2 | Mus musculus Fbw3 mRNA.                                                                                    |
| sc030349.4.1 29-S   | 1.08                | 1.09              | 1.02               | 0.98                  | 0.80                | 0.83                 | -0.15               | -0.27             | -0.32              | 133690000      | NM_133690.0 | Mus musculus LSM8 homolog U6 small nuclear RNA associated (S. cerevisiae) (Lsm8) mRNA.                     |
| sc0073296.1 60-S    | 0.97                | 1.34              | 1.19               | 0.86                  | 0.95                | 0.97                 | -0.15               | -0.50             | -0.32              | Rhhb3          | NM_028493.1 | Mus musculus Rho-related BTB domain containing 3 (Rhhb3) mRNA.                                             |
| sc052911.9 189-S    | 0.91                | 1.34              | 1.14               | 0.84                  | 0.95                | 0.92                 | -0.11               | -0.49             | -0.31              | Esrra          | NM_007953.1 | Mus musculus estrogen related receptor alpha (Esrra) mRNA.                                                 |
| sc000212555.2 311-S | 1.15                | 1.14              | 1.00               | 1.02                  | 0.88                | 0.81                 | -0.17               | -0.39             | -0.31              | Pqlc2          | NM_145384.1 | Mus musculus PO loop repeat containing 2 (Pqlc2) mRNA.                                                     |
| sc00021859.1 62-S   | 0.92                | 1.31              | 1.18               | 0.87                  | 0.84                | 0.96                 | -0.07               | -0.64             | -0.31              | Timpp3         | NM_011595.1 | Mus musculus tissue inhibitor of metalloproteinase 3 (Timpp3) mRNA.                                        |
| sc0072795.9 17-S    | 0.93                | 1.08              | 1.16               | 0.87                  | 0.94                | 0.94                 | -0.09               | -0.21             | -0.31              | Tle19          | NM_028360.1 | Mus musculus Tle19 mRNA.                                                                                   |
| sc046365.19 187-S   | 0.70                | 1.29              | 1.31               | 0.85                  | 0.89                | 1.06                 | -0.09               | -0.53             | -0.31              | BC03699L06Rik  | NM_145482   | Mus musculus cDNA sequence BC03699L (BC03699L) mRNA.                                                       |
| sc030402.11.1 12-S  | 0.98                | 1.20              | 1.13               | 0.88                  | 1.02                | 0.91                 | -0.12               | -0.31             | -0.31              | BC0202002      | NM_145374.1 | Mus musculus cDNA sequence BC0202002 (BC0202002) mRNA.                                                     |
| sc051486.3 298-S    | 0.88                | 1.20              | 1.29               | 0.72                  | 0.92                | 1.03                 | -0.30               | -0.38             | -0.31              | Spry4          | NM_011898.2 | Mus musculus sprouty homolog 4 (Drosophila) (Spry4) mRNA.                                                  |
| sc031497.15 58 10-S | 0.99                | 1.11              | 1.12               | 0.93                  | 1.04                | 0.90                 | -0.09               | -0.09             | -0.31              | Hpn            | NM_008281.1 | Mus musculus hepsin (Hpn) mRNA.                                                                            |
| sc0067980.2 203-S   | 1.02                | 1.10              | 1.11               | 0.95                  | 0.89                | 0.90                 | -0.09               | -0.31             | -0.30              | Gnpda2         | NM_027681.1 | Mus musculus glucosamine-6-phosphate deaminase 2 (Gnpda2) mRNA.                                            |
| sc00208292.2 202-S  | 0.97                | 1.35              | 1.23               | 0.84                  | 0.86                | 0.99                 | -0.21               | -0.63             | -0.30              | 9030612M13Rik  | NM_172458.2 | Mus musculus RIKEN cDNA 9030612M13 gene (9030612M13Rik) mRNA.                                              |
| sc00239743.2 208-S  | 0.96                | 1.15              | 1.20               | 0.89                  | 0.93                | 0.98                 | -0.11               | -0.31             | -0.30              | Klh6           | NM_183390.1 | Mus musculus ketch-like 6 (Drosophila) (Klh6) mRNA.                                                        |
| sc016005.18.3 31-S  | 0.86                | 1.27              | 1.25               | 0.76                  | 0.93                | 1.03                 | -0.15               | -0.44             | -0.30              | lqw61          | XM_129604.2 | Mus musculus lqw61 mRNA.                                                                                   |
| sc053039.13 3-S     | 0.77                | 1.26              | 1.21               | 0.78                  | 0.84                | 1.04                 | -0.03               | -0.38             | -0.30              | Nhnc2          | NM_028361.1 | Mus musculus RIKEN cDNA 0610039D01 gene (0610039D01Rik) mRNA.                                              |
| sc008436.2 19-S     | 1.09                | 0.91              | 1.02               | 1.08                  | 0.99                | 0.83                 | -0.01               | -0.13             | -0.30              | 1100001122Rik  | XM_485311   | Mus musculus RIKEN cDNA 1100001122 gene (1100001122Rik) mRNA.                                              |
| sc070425.3 227-S    | 0.97                | 1.29              | 1.35               | 0.81                  | 0.85                | 1.10                 | -0.25               | -0.63             | -0.30              | Csnk1g3        | NM_152809.1 | Mus musculus casein kinase 1 gamma 3 (Csnk1g3) mRNA.                                                       |
| sc050935.5 66-S     | 1.01                | 1.24              | 1.11               | 0.89                  | 0.98                | 0.92                 | -0.16               | -0.32             | -0.29              | Hmgat1         | NM_016660.1 | Mus musculus high mobility group AT-hook 1 (Hmgat1) mRNA.                                                  |
| sc00119414.2 254-S  | 1.07                | 1.25              | 1.02               | 0.93                  | 0.75                | 0.86                 | -0.20               | -0.74             | -0.29              | Rasa3          | NM_009025.1 | Mus musculus RAS p21 protein activator 3 (Rasa3) mRNA.                                                     |
| sc020320.8 193-S    | 1.12                | 1.13              | 1.00               | 0.93                  | 0.95                | 0.82                 | -0.26               | -0.27             | -0.29              | Sdfr1          | NM_009145.1 | Mus musculus stromal cell derived factor receptor 1 (Sdfr1) mRNA.                                          |
| sc00017859.1 306-S  | 0.86                | 1.29              | 1.27               | 0.81                  | 1.07                | 1.04                 | -0.10               | -0.27             | -0.28              | Mxi1           | NM_010847.1 | Mus musculus Max interacting protein 1 (Mxi1) mRNA.                                                        |
| sc0501433.1 18-S    | 0.79                | 1.07              | 1.07               | 0.87                  | 0.90                | 0.93                 | -0.15               | -0.04             | -0.28              | 0610039D01Rik  | NM_173388.2 | Mus musculus RIKEN cDNA 0610039D01 gene (0610039D01Rik) mRNA.                                              |
| sc020743.1 114-S    | 0.95                | 1.40              | 1.29               | 0.75                  | 1.00                | 1.07                 | -0.34               | -0.50             | -0.28              | Sprb3          | XM_129130.5 | Mus musculus spectrin beta 3 (Sprb3) mRNA.                                                                 |
| sc074775.1 71-S     | 0.94                | 1.06              | 1.24               | 0.97                  | 0.95                | 1.02                 | 0.04                | -0.16             | -0.28              | D15Ertd735e    | NM_029098.2 | Mus musculus spectrin beta 3 (Sprb3) mRNA.                                                                 |
| sc0245867.4 1-S     | 0.99                | 1.35              | 1.22               | 0.80                  | 0.90                | 1.02                 | -0.30               | -0.58             | -0.28              | 5330414D10Rik  | NM_153594.2 | Mus musculus RIKEN cDNA 5330414D10 gene (5330414D10Rik) mRNA.                                              |
| sc014252.10 327-S   | 1.02                | 1.04              | 1.15               | 0.97                  | 0.96                | 0.95                 | -0.07               | -0.13             | -0.28              | Fliot2         | NM_008028.1 | Mus musculus flotillin 2 (Fliot2) mRNA.                                                                    |
| sc022876.3 595-S    | 1.05                | 1.21              | 1.17               | 0.87                  | 0.89                | 0.96                 | -0.27               | -0.46             | -0.28              | Mci1           | NM_008562.2 | Mus musculus myeloid cell leukemia sequence 1 (Mci1) mRNA.                                                 |
| sc016337.27 477-S   | 1.07                | 1.10              | 1.03               | 0.94                  | 0.84                | 0.85                 | -0.18               | -0.39             | -0.28              | Zranb3         | XM_129483.3 | Mus musculus guanine nucleotide binding protein related sequence 1 (Gria-rs1) mRNA.                        |
| sc00014670.2 304-S  | 1.03                | 1.18              | 1.13               | 0.90                  | 0.93                | 0.93                 | -0.19               | -0.38             | -0.27              | 0610039D01Rik  | NM_010847.1 | Mus musculus guanine nucleotide binding protein related sequence 1 (Gria-rs1) mRNA.                        |
| sc026467.3 1 2-S    | 0.89                | 1.27              | 1.23               | 0.93                  | 1.00                | 1.02                 | 0.07                | -0.35             | -0.27              | Chic2          | NM_028850.1 | Mus musculus cysteine-rich hydrophobic domain 2 (Chic2) mRNA.                                              |
| sc00001121.1 1-S    | 0.99                | 1.06              | 1.04               | 0.90                  | 0.95                | 0.87                 | -0.14               | -0.16             | -0.27              | Ndufa5         | NM_026614.1 | Mus musculus NADH dehydrogenase (ubiquinone) 1 alpha subcomplex 5 (Ndufa5) mRNA.                           |
| sc039808.15.1 10-S  | 0.82                | 1.20              | 1.14               | 0.88                  | 1.04                | 0.95                 | 0.10                | -0.20             | -0.27              | Aaf1           | NM_019816.1 | Mus musculus apoptosis antagonizing transcription factor (Aaf1) mRNA.                                      |
| sc042093.16.1 39-S  | 0.90                | 1.36              | 1.18               | 0.80                  | 1.02                | 0.98                 | -0.16               | -0.42             | -0.27              | Cimn           | NM_053155.1 | Mus musculus calinin (Cimn) mRNA.                                                                          |
| sc043625.26 196-S   | 0.99                | 1.16              | 1.09               | 0.84                  | 0.93                | 0.91                 | -0.23               | -0.31             | -0.27              | 5832424M12     | NM_172591.2 | Mus musculus hypothetical protein 5832424M12 (5832424M12) mRNA.                                            |
| sc00032912.1 59-S   | 0.86                | 1.22              | 1.31               | 0.75                  | 0.96                | 1.10                 | -0.19               | -0.34             | -0.27              | E030027L17     | NM_183300.1 | Mus musculus hypothetical protein E030027L17 (E030027L17) mRNA.                                            |
| sc030396.1 1917 2-S | 1.00                | 1.27              | 1.23               | 0.82                  | 0.88                | 1.04                 | -0.27               | -0.53             | -0.26              | 2900057K09Rik  | NM_173388.2 | Mus musculus RIKEN cDNA 2900057K09 gene (2900057K09Rik) mRNA.                                              |
| sc0001327.1 163-S   | 0.91                | 1.06              | 1.16               | 0.91                  | 1.13                | 0.97                 | 0.01                | -0.09             | -0.28              | Trim41         | NM_145377   | Mus musculus tripartite motif-containing 41 (Trim41) mRNA.                                                 |
| sc006807.1 5-S      | 1.01                | 1.10              | 1.16               | 0.92                  | 0.93                | 0.97                 | -0.12               | -0.24             | -0.26              | 8430438D04Rik  | NM_025775.1 | Mus musculus RIKEN cDNA 8430438D04 gene (8430438D04Rik) mRNA.                                              |
| sc054952.8 631-S    | 1.17                | 1.02              | 1.00               | 1.10                  | 0.89                | 0.84                 | -0.09               | -0.19             | -0.25              | 1200013B08Rik  | NM_028773.2 | Mus musculus RIKEN cDNA 1200013B08 gene (1200013B08Rik) mRNA.                                              |
| sc030675.13.1 1-S   | 2.64                | 1.13              | 1.01               | 3.07                  | 0.87                | 0.85                 | -0.22               | -0.35             | -0.25              | Coro1a         | NM_009898.2 | Mus musculus coronin actin binding protein 1A (Coro1a) mRNA.                                               |
| sc041266.11.1 55-S  | 1.11                | 1.02              | 1.00               | 1.03                  | 0.91                | 0.84                 | -0.11               | -0.17             | -0.25              | Smyd4          | NM_177009.1 | Mus musculus SET and MYND domain containing 4 (Smyd4) mRNA.                                                |
| sc031051.4.1 12-S   | 1.05                | 1.11              | 1.09               | 0.92                  | 0.95                | 0.92                 | -0.19               | -0.22             | -0.25              | 1110001A23Rik  | XM_133645.4 | Mus musculus RIKEN cDNA 1110001A23 gene (1110001A23Rik) mRNA.                                              |
| sc038498.25.1 91-S  | 0.98                | 1.26              | 1.14               | 0.99                  | 1.02                | 0.96                 | -0.01               | -0.30             | -0.24              | Haeet1         | NM_012473.1 | Mus musculus solute carrier family 2 (facilitated glucose transporter) member 5 (Slc2a5) mRNA.             |
| sc005645.12 106-S   | 1.10                | 1.11              | 0.88               | 1.01                  | 0.95                | 0.78                 | -0.12               | -0.77             | -0.                |                |             |                                                                                                            |

| Gene Name          | Control<br>18 Hours | Control<br>1 Week | Control<br>4 Weeks | Treatment<br>18 Hours | Treatment<br>1 Week | Treatment<br>4 Weeks | Log2 FC<br>18 Hours | Log2 FC<br>1 Week | Log2 FC<br>4 Weeks | Symbol        | Accession   | Definition                                                                                                              |
|--------------------|---------------------|-------------------|--------------------|-----------------------|---------------------|----------------------|---------------------|-------------------|--------------------|---------------|-------------|-------------------------------------------------------------------------------------------------------------------------|
| sc0058909.2.289-S  | 1.02                | 1.70              | 1.31               | 0.99                  | 0.74                | 1.15                 | -0.04               | -1.19             | -0.18              | D430015B01Rik | NM_153574.1 | Mus musculus RIKEN cDNA D430015B01 gene (D430015B01Rik) mRNA.                                                           |
| sc0617118.7.5-S    | 0.99                | 1.20              | 1.09               | 0.87                  | 1.02                | 0.96                 | -0.18               | -0.25             | -0.18              | Bfar          | XM_148088.1 | Mus musculus bifunctional apoptosis regulator (Bfar) mRNA.                                                              |
| sc31237.29.375-S   | 1.08                | 1.15              | 1.04               | 0.88                  | 0.84                | 0.92                 | -0.30               | -0.46             | -0.18              | Tjp1          | NM_009386.1 | Mus musculus tight junction protein 1 (Tjp1) mRNA.                                                                      |
| sc0019419.1.154-S  | 1.26                | 1.01              | 0.97               | 1.22                  | 0.87                | 0.86                 | -0.05               | -0.22             | -0.18              | Hasgrp1       | NM_011246.2 | Mus musculus HAS guanyl releasing protein 1 (Hasgrp1) mRNA.                                                             |
| sc0003373.1.54-S   | 0.99                | 1.26              | 1.04               | 0.90                  | 1.04                | 0.92                 | -0.13               | -0.27             | -0.17              | Ubaap1        | NM_133935.2 | Mus musculus ubiquitin associated domain containing 1 (Ubaap1) mRNA.                                                    |
| sc00100317.1.138-S | 1.07                | 1.04              | 1.04               | 0.90                  | 0.84                | 0.92                 | -0.26               | -0.30             | -0.17              | Alu040320     | NM_133886.1 | Mus musculus expressed sequence Alu040320 (Alu040320) mRNA.                                                             |
| sc27567.9.262-S    | 1.05                | 1.20              | 0.96               | 1.08                  | 0.84                | 0.85                 | 0.04                | -0.50             | -0.17              | Ccng2         | NM_007635.2 | Mus musculus cyclin G2 (Ccng2) mRNA.                                                                                    |
| sc16734.10.1.6-S   | 0.97                | 1.31              | 1.19               | 0.76                  | 0.94                | 1.03                 | -0.34               | -0.49             | -0.17              | Cik1          | NM_009905.1 |                                                                                                                         |
| sc21235.24.380-S   | 1.07                | 1.44              | 1.16               | 0.98                  | 0.93                | 1.02                 | -0.13               | -0.61             | -0.17              | BC026657      | NM_029895.3 |                                                                                                                         |
| sc33121.3.245-S    | 0.98                | 1.17              | 1.09               | 0.98                  | 0.94                | 0.97                 | 0.00                | -0.32             | -0.17              | Zfp254        | NM_025324.1 |                                                                                                                         |
| sc050767.4.663-S   | 1.27                | 1.06              | 0.90               | 1.23                  | 0.78                | 0.81                 | -0.04               | -0.45             | -0.17              | Nrm           | NM_134122.1 | Mus musculus nrm (nuclear envelope membrane protein) (Nrm) mRNA.                                                        |
| sc00176334.1.222-S | 0.98                | 1.12              | 1.04               | 0.90                  | 0.98                | 1.04                 | 0.92                | -0.34             | -0.16              | Z70084L06Rik  | NM_198184.1 | Mus musculus RIKEN cDNA Z70084L06 gene (Z70084L06Rik) mRNA.                                                             |
| sc068636.1.32-S    | 0.82                | 1.11              | 1.19               | 0.87                  | 1.00                | 1.06                 | 0.08                | -0.13             | -0.16              | 0610006I08Rik | NM_025791.1 | Mus musculus RIKEN cDNA 0610006I08 gene (0610006I08Rik) mRNA.                                                           |
| sc31130.14.110-S   | 1.08                | 1.08              | 0.99               | 1.09                  | 0.83                | 0.89                 | 0.02                | -0.37             | -0.16              | Fes           | NM_010194.1 | Mus musculus feline sarcoma oncogene (Fes) mRNA.                                                                        |
| sc27703.26.20-S    | 0.99                | 1.25              | 1.12               | 0.91                  | 0.97                | 1.00                 | -0.13               | -0.36             | -0.16              | Pdgfra        | NM_011058.1 | Mus musculus platelet derived growth factor receptor alpha polypeptide (Pdgfra) mRNA.                                   |
| sc237943.1.29-S    | 0.98                | 1.20              | 1.10               | 0.80                  | 0.94                | 0.98                 | -0.29               | -0.37             | -0.16              | 5430405G24Rik | XM_152907.3 | Mus musculus RIKEN cDNA 5430405G24 gene (5430405G24Rik) mRNA.                                                           |
| sc32770.4.383-S    | 0.91                | 1.31              | 1.22               | 0.94                  | 0.89                | 1.08                 | 0.05                | -0.55             | -0.16              | 1600014C10Rik | NM_028166   | Mus musculus RIKEN cDNA 1600014C10 gene (1600014C10Rik) mRNA.                                                           |
| sc43920.5.585.30-S | 1.47                | 1.02              | 1.00               | 1.51                  | 0.91                | 0.90                 | 0.04                | -0.17             | -0.16              | Dok3          | NM_013739.1 |                                                                                                                         |
| sc49394.3.153-S    | 1.13                | 1.47              | 0.98               | 0.98                  | 0.71                | 0.88                 | -0.21               | -1.02             | -0.16              | Sna2          | XM_147233.1 | Mus musculus snail homolog 2 (Drosophila) (Sna2) mRNA.                                                                  |
| sc00215693.1.84-S  | 1.05                | 1.15              | 1.05               | 0.96                  | 0.79                | 0.98                 | -0.13               | -0.54             | -0.15              | B930008K04Rik | NM_175446.2 | Mus musculus RIKEN cDNA B930008K04 gene (B930008K04Rik) mRNA.                                                           |
| sc023849.4.8-S     | 1.03                | 1.26              | 0.99               | 1.11                  | 0.86                | 0.90                 | 0.10                | -0.55             | -0.15              | Copab         | NM_011803.1 | Mus musculus core promoter element binding protein (Copab) mRNA.                                                        |
| sc0320398.3.8-S    | 0.88                | 1.17              | 1.17               | 0.71                  | 0.87                | 1.06                 | -0.30               | -0.44             | -0.15              | Lrig3         | NM_177152.4 |                                                                                                                         |
| sc018550.2.67-S    | 0.88                | 1.19              | 1.20               | 0.77                  | 0.92                | 1.08                 | -0.19               | -0.37             | -0.15              | Furin         | NM_011046.1 | Mus musculus furin (paired basic amino acid cleaving enzyme) (Furin) mRNA.                                              |
| sc44868.8.25-S     | 0.97                | 1.11              | 1.16               | 0.79                  | 0.79                | 1.05                 | -0.30               | -0.50             | -0.14              | Gcnt2         | NM_008105.2 | Mus musculus glucosaminyl (N-acetyl) transferase 2 l-branching enzyme (Gcnt2) transcript variant 3 mRNA.                |
| sc066270.6.30-S    | 1.17                | 1.34              | 0.93               | 1.06                  | 0.71                | 0.86                 | -0.14               | -0.93             | -0.13              | 1810015C04Rik | NM_025459.2 | Mus musculus RIKEN cDNA 1810015C04 gene (1810015C04Rik) mRNA.                                                           |
| sc079656.1.42-S    | 1.08                | 1.10              | 1.00               | 0.97                  | 0.92                | 0.92                 | -0.15               | -0.26             | -0.12              | Brdb          | NM_144864.1 | Mus musculus bromodomain containing 8 (Brdb) mRNA.                                                                      |
| sc17296.11.403-S   | 0.93                | 1.23              | 1.12               | 0.83                  | 1.03                | 1.05                 | -0.18               | -0.35             | -0.12              | Vamp4         | NM_016796.2 | Mus musculus vesicle associated membrane protein 4 (Vamp4) mRNA.                                                        |
| sc20413.8.1.90-S   | 1.00                | 1.15              | 1.04               | 0.96                  | 0.98                | 0.96                 | -0.05               | -0.23             | -0.12              | Itpka         | NM_146125.1 | Mus musculus inositol 145-trisphosphate 3-kinase A (Itpka) mRNA.                                                        |
| sc31124.24.1.96-S  | 1.15                | 1.06              | 0.87               | 1.08                  | 0.69                | 0.82                 | -0.08               | -0.65             | -0.12              | Blm           | NM_007550   | Mus musculus Bloom syndrome homolog (human) (Blm) mRNA.                                                                 |
| sc0002200.1.1377-S | 1.03                | 1.21              | 1.13               | 0.91                  | 0.90                | 1.05                 | -0.19               | -0.42             | -0.11              | Nfatc1        | NM_198429.1 | Mus musculus nuclear factor of activated T-cells cytoplasmic calcineurin-dependent 1 (Nfatc1) mRNA.                     |
| sc47641.14.223-S   | 1.12                | 1.11              | 1.00               | 0.99                  | 0.88                | 0.93                 | -0.17               | -0.35             | -0.11              | D15Erd781e    | NM_145476.2 |                                                                                                                         |
| sc40333.9.365-S    | 1.45                | 1.07              | 0.89               | 1.25                  | 0.89                | 0.82                 | -0.21               | -0.26             | -0.11              | Mat2b         | NM_134017.1 | Mus musculus methionine adenosyltransferase II beta (Mat2b) mRNA.                                                       |
| sc0229877.2.148-S  | 0.96                | 1.16              | 1.03               | 0.84                  | 0.95                | 0.96                 | -0.18               | -0.29             | -0.10              | Rap1gds1      | NM_145544   | Mus musculus RAP1 GTP-GDP dissociation stimulator 1 (Rap1gds1) mRNA.                                                    |
| sc53012.17.160-S   | 0.94                | 1.50              | 1.16               | 0.71                  | 0.98                | 1.09                 | -0.41               | -0.62             | -0.10              | AI450540      | NM_145505.2 | Mus musculus expressed sequence AI450540 (AI450540) mRNA.                                                               |
| sc068763.4.12-S    | 1.12                | 0.95              | 0.97               | 1.32                  | 1.00                | 0.90                 | 0.24                | 0.07              | -0.10              | 1110038B12Rik | XM_359415.1 | Mus musculus RIKEN cDNA 1110038B12 gene (1110038B12Rik) mRNA.                                                           |
| sc038879.8.20-S    | 0.88                | 1.17              | 1.06               | 0.92                  | 0.99                | 0.99                 | 0.07                | -0.24             | -0.09              | 4632428N05Rik | NM_028732.2 | Mus musculus RIKEN cDNA 4632428N05 gene (4632428N05Rik) mRNA.                                                           |
| sc0056458.2.48-S   | 0.92                | 1.32              | 1.30               | 0.77                  | 0.86                | 1.25                 | -0.26               | -0.61             | -0.08              | Foxo1         | NM_019739.2 | Mus musculus forkhead box O1 (Foxo1) mRNA.                                                                              |
| sc0235493.12.117-S | 0.84                | 1.19              | 1.17               | 0.70                  | 0.89                | 1.10                 | -0.26               | -0.42             | -0.08              | BC031353      | NM_153584.1 | Mus musculus cDNA sequence BC031353 (BC031353) mRNA.                                                                    |
| sc37999.19.246-S   | 1.02                | 1.18              | 1.09               | 0.92                  | 0.91                | 1.04                 | -0.15               | -0.38             | -0.08              | Aim1          | NM_172393.1 | Mus musculus absent in melanoma 1 (Aim1) mRNA.                                                                          |
| sc34858.4.85-S     | 1.62                | 1.81              | 0.92               | 2.05                  | 0.89                | 0.89                 | 0.34                | -0.73             | -0.05              | Slc25a4       | XM_134169.4 | Mus musculus solute carrier family 25 (mitochondrial carrier, adenine nucleotide translocator) member 4 (Slc25a4) mRNA. |
| sc0068145.2.4-S    | 1.00                | 1.27              | 1.11               | 0.86                  | 0.95                | 1.09                 | -0.22               | -0.42             | -0.03              | 573046H423Rik | NM_028576.1 | Mus musculus RIKEN cDNA 573046H423 gene (573046H423Rik) mRNA.                                                           |
| sc030046.1.110-S   | 1.12                | 1.24              | 1.07               | 0.93                  | 0.94                | 1.06                 | -0.27               | -0.40             | -0.02              | Zfp292        | NM_013889.1 | Mus musculus zinc finger protein 292 (Zfp292) mRNA.                                                                     |
| sc27314.13.303-S   | 0.91                | 1.74              | 1.34               | 0.74                  | 0.93                | 1.36                 | -0.30               | -0.91             | -0.01              | Fbxo21        | NM_145564.2 | Mus musculus F-box only protein 21 (Fbxo21) mRNA.                                                                       |
| sc41108.8.163-S    | 0.90                | 1.09              | 1.03               | 0.95                  | 1.01                | 1.07                 | 0.09                | -0.11             | 0.05               | Ppm1d         | NM_016910.2 | Mus musculus protein phosphatase 1D magnesium-dependent delta isoform (Ppm1d) mRNA.                                     |
| sc41896.5.609-S    | 1.02                | 1.07              | 0.85               | 1.12                  | 0.92                | 0.88                 | 0.14                | -0.21             | 0.05               | Gal3st1       | NM_016922.2 | Mus musculus galactose 3-O-sulfotransferase 1 (Gal3st1) mRNA.                                                           |
| sc011674.2.46-S    | 0.38                | 1.92              | 1.01               | 0.38                  | 1.14                | 1.10                 | 0.04                | -0.44             | 0.13               | Aldoa         | NM_007438.2 |                                                                                                                         |
| sc0014733.2.286-S  | 0.58                | 1.67              | 1.70               | 0.74                  | 0.89                | 1.85                 | 0.34                | -0.77             | 0.16               | Gpc1          | NM_016996.1 | Mus musculus glycopin 1 (Gpc1) mRNA.                                                                                    |
| sc0067203.2.205-S  | 0.88                | 1.08              | 1.01               | 0.91                  | 1.01                | 1.14                 | 0.04                | -0.09             | 0.16               | Nde1          | NM_023317.1 | Mus musculus nuclear distribution gene E homolog 1 (A nidulans) (Nde1) mRNA.                                            |
| sc18545.1.131-S    | 0.99                | 1.17              | 0.86               | 0.97                  | 1.01                | 0.99                 | -0.02               | -0.20             | 0.21               | Thbd          | NM_009378.1 | Mus musculus thrombomodulin (Thbd) mRNA.                                                                                |
| sc22134.5.174-S    | 1.71                | 1.34              | 0.80               | 1.62                  | 0.87                | 0.98                 | -0.09               | -0.53             | 0.30               | Pin2          | NM_019410.2 | Mus musculus profilin (Pin2) mRNA.                                                                                      |
