# Supplementary material
Source: publisher figshare collection journal article supplement (https://karger.figshare.com/articles/dataset/_/4748017)
Supplement: Supplementary file 1 [file 1 › JNN_201305003_1_12.pdf]

**Article Title:** Gene Expression Changes in Spleens and Livers of Tumour-Bearing Mice Suggest Anti-Inflammatory Effects of Oil Palm Phenolics in Delaying Tumour Growth.

**Journal Name:** Journal of Nutrigenetics and Nutrigenomics.

**Author Names:** Soon-Sen Leow, Shamala Devi Sekaran, Kalyana Sundram, YewAi Tan, Ravigadevi Sambanthamurthi.

**Corresponding Author:** Ravigadevi Sambanthamurthi; Malaysian Palm Oil Board, No. 6, Persiaran Institusi, Bandar Baru Bangi, 43000 Kajang, Selangor, Malaysia; E-mail: [raviga@mpob.gov.my](mailto:raviga@mpob.gov.my).

## **SUPPLEMENTARY MATERIAL 2.**

List of GenMAPPs and gene ontologies significantly changed across time in spleens and livers of mice supplemented with OPP (Treatment group versus control group in mice injected with J558 myeloma cells at three time points). Genes classified as up-regulated or down-regulated with time by K-means clustering were analysed separately. All GenMAPPs and gene ontologies identified as significant had Permuted P Values of less than 0.05, Numbers of Genes Changed of more than or equal to 2 and Z Scores of more than 2.

**(A)** GenMAPPs and gene ontologies significantly changed across time in spleens.

**(B)** GenMAPPs and gene ontologies significantly changed across time in livers.

| A                            |                                                                  |                |                 |                 |                 |                 |                 |                  |                  |
|------------------------------|------------------------------------------------------------------|----------------|-----------------|-----------------|-----------------|-----------------|-----------------|------------------|------------------|
| UP-REGULATED - GENMAPP       |                                                                  |                |                 |                 |                 |                 |                 |                  |                  |
| No.                          | MAPP Name                                                        | Number Changed | Number Measured | Number on MAPP  | Percent Changed | Percent Present | Z Score         | Permuted P Value |                  |
| 1                            | Mm_Ribosomal_Proteins                                            | 34             | 78              | 80              | 43.5897         | 97.5000         | 6.7320          | 0.0000           |                  |
| 2                            | Mm_Electron_Transport_Chain                                      | 29             | 66              | 83              | 43.9394         | 79.5181         | 6.2620          | 0.0000           |                  |
| 3                            | Mm_mRNA_processing_binding_Reactome                              | 106            | 426             | 551             | 24.8826         | 77.3140         | 5.3120          | 0.0000           |                  |
| 4                            | Mm_RNA_transcription_Reactome                                    | 17             | 40              | 41              | 42.5000         | 97.5610         | 4.6100          | 0.0000           |                  |
| 5                            | Mm_Translation_Factors                                           | 19             | 49              | 50              | 38.7755         | 98.0000         | 4.3920          | 0.0000           |                  |
| 6                            | Mm_Proteasome_Degradation                                        | 25             | 73              | 81              | 34.2466         | 90.1235         | 4.3100          | 0.0000           |                  |
| 7                            | Mm_Ubiquinone_biosynthesis                                       | 9              | 17              | 43              | 52.9412         | 39.5349         | 4.1760          | 0.0010           |                  |
| 8                            | Mm_TNF-alpha-NF-kB_NetPath_9                                     | 43             | 166             | 176             | 25.9036         | 94.3182         | 3.5770          | 0.0010           |                  |
| 9                            | Mm_DNA_replication_Reactome                                      | 14             | 40              | 41              | 35.0000         | 97.5610         | 3.3090          | 0.0030           |                  |
| 10                           | Mm_Unsaturated_Fatty_Acid_Beta_Oxidation_BiGCaT                  | 4              | 6               | 6               | 66.6667         | 100.0000        | 3.3970          | 0.0060           |                  |
| 11                           | Mm_Galactose_metabolism                                          | 8              | 19              | 46              | 42.1053         | 41.3044         | 3.1230          | 0.0080           |                  |
| 12                           | Mm_Krebs-TCA_Cycle                                               | 10             | 29              | 29              | 34.4828         | 100.0000        | 2.7370          | 0.0080           |                  |
| 13                           | Mm_Fructose_and_mannose_metabolism                               | 10             | 30              | 77              | 33.3333         | 38.9610         | 2.6120          | 0.0100           |                  |
| 14                           | Mm_Mitochondrial_fatty_acid_betaoxidation                        | 6              | 16              | 16              | 37.5000         | 100.0000        | 2.3600          | 0.0220           |                  |
| UP-REGULATED - GENE ONTOLOGY |                                                                  |                |                 |                 |                 |                 |                 |                  |                  |
| No.                          | GO Name                                                          | GO Type        | Number Changed  | Number Measured | Number in GO    | Percent Changed | Percent Present | Z Score          | Permuted P Value |
| 1                            | oxidative phosphorylation                                        | P              | 32              | 66              | 97              | 48.4849         | 68.0412         | 8.9960           | 0.0000           |
| 2                            | cellular biosynthesis                                            | P              | 210             | 1016            | 1277            | 20.6693         | 79.5615         | 8.4770           | 0.0000           |
| 3                            | intracellular transport                                          | P              | 144             | 648             | 740             | 22.2222         | 87.5676         | 7.9130           | 0.0000           |
| 4                            | protein localization                                             | P              | 138             | 644             | 714             | 21.4286         | 90.1961         | 7.2600           | 0.0000           |
| 5                            | nucleotide biosynthesis                                          | P              | 33              | 129             | 155             | 25.5814         | 83.2258         | 4.6360           | 0.0000           |
| 6                            | glucose catabolism                                               | P              | 16              | 57              | 89              | 28.0702         | 64.0449         | 3.6480           | 0.0000           |
| 7                            | phosphate metabolism                                             | P              | 127             | 790             | 902             | 16.0760         | 87.5832         | 3.3670           | 0.0000           |
| 8                            | physiological process                                            | P              | 1379            | 9941            | 11632           | 13.8718         | 85.4625         | 8.6240           | 0.0000           |
| 9                            | proteasomal ubiquitin-dependent protein catabolism               | P              | 11              | 20              | 22              | 55.0000         | 90.9091         | 5.8330           | 0.0000           |
| 10                           | ribosome biogenesis and assembly                                 | P              | 33              | 86              | 105             | 38.3721         | 81.9048         | 7.4070           | 0.0000           |
| 11                           | purine nucleotide biosynthesis                                   | P              | 26              | 75              | 96              | 34.6667         | 78.1250         | 5.9340           | 0.0000           |
| 12                           | ATP biosynthesis                                                 | P              | 18              | 49              | 64              | 36.7347         | 76.5625         | 5.2340           | 0.0000           |
| 13                           | nucleocytoplasmic transport                                      | P              | 29              | 117             | 130             | 24.7863         | 90.0000         | 4.1500           | 0.0000           |
| 14                           | biosynthesis                                                     | P              | 236             | 1154            | 1428            | 20.4506         | 80.8123         | 8.8440           | 0.0000           |
| 15                           | pentose-phosphate shunt                                          | P              | 6               | 8               | 10              | 75.0000         | 80.0000         | 5.4130           | 0.0000           |
| 16                           | generation of precursor metabolites and energy                   | P              | 111             | 598             | 722             | 18.5619         | 82.8255         | 4.8020           | 0.0000           |
| 17                           | RNA processing                                                   | P              | 88              | 329             | 371             | 26.7477         | 88.6792         | 8.1070           | 0.0000           |
| 18                           | ER-associated protein catabolism                                 | P              | 7               | 12              | 12              | 58.3333         | 100.0000        | 4.8700           | 0.0000           |
| 19                           | protein catabolism                                               | P              | 45              | 190             | 215             | 23.6842         | 88.3721         | 4.8360           | 0.0000           |
| 20                           | ribosome biogenesis                                              | P              | 28              | 79              | 84              | 35.4430         | 94.0476         | 6.3020           | 0.0000           |
| 21                           | vesicle docking during exocytosis                                | P              | 9               | 19              | 20              | 47.3684         | 95.0000         | 4.6700           | 0.0000           |
| 22                           | cellular physiological process                                   | P              | 1318            | 8916            | 10403           | 14.7824         | 85.7061         | 11.5850          | 0.0000           |
| 23                           | mitochondrial electron transport\, NADH to ubiquinone            | P              | 10              | 14              | 25              | 71.4286         | 56.0000         | 6.7550           | 0.0000           |
| 24                           | nucleotide metabolism                                            | P              | 50              | 194             | 236             | 25.7732         | 82.2034         | 5.7800           | 0.0000           |
| 25                           | protein modification                                             | P              | 231             | 1476            | 1665            | 15.6504         | 88.6487         | 4.1940           | 0.0000           |
| 26                           | translational initiation                                         | P              | 22              | 58              | 72              | 37.9310         | 80.5556         | 5.9750           | 0.0000           |
| 27                           | mRNA export from nucleus                                         | P              | 12              | 26              | 32              | 46.1539         | 81.2500         | 5.2760           | 0.0000           |
| 28                           | regulation of translational initiation                           | P              | 12              | 30              | 30              | 40.0000         | 100.0000        | 4.6390           | 0.0000           |
| 29                           | nucleobase\, nucleoside\, nucleotide and nucleic acid metabolism | P              | 425             | 2803            | 3355            | 15.1623         | 83.5469         | 5.2170           | 0.0000           |
| 30                           | RNA splicing                                                     | P              | 44              | 144             | 167             | 30.5556         | 86.2276         | 6.7300           | 0.0000           |
| 31                           | ATP synthesis coupled proton transport                           | P              | 17              | 45              | 60              | 37.7778         | 75.0000         | 5.2290           | 0.0000           |
| 32                           | proton transport                                                 | P              | 21              | 74              | 92              | 28.3784         | 80.4348         | 4.2400           | 0.0000           |
| 33                           | mRNA processing                                                  | P              | 49              | 173             | 198             | 28.3237         | 87.3737         | 6.4830           | 0.0000           |
| 34                           | ER to Golgi vesicle-mediated transport                           | P              | 20              | 53              | 59              | 37.7359         | 89.8305         | 5.6670           | 0.0000           |
| 35                           | rRNA processing                                                  | P              | 22              | 65              | 70              | 33.8462         | 92.8571         | 5.3200           | 0.0000           |
| 36                           | vesicle-mediated transport                                       | P              | 82              | 379             | 406             | 21.6359         | 93.3498         | 5.6420           | 0.0000           |
| 37                           | nuclear mRNA splicing\, via spliceosome                          | P              | 36              | 118             | 135             | 30.5085         | 87.4074         | 6.0710           | 0.0000           |
| 38                           | ubiquitin-dependent protein catabolism                           | P              | 38              | 132             | 149             | 28.7879         | 88.5906         | 5.8190           | 0.0000           |
| 39                           | regulation of progression through cell cycle                     | P              | 70              | 375             | 410             | 18.6667         | 91.4634         | 3.8360           | 0.0000           |
| 40                           | protein folding                                                  | P              | 50              | 200             | 227             | 25.0000         | 88.1057         | 5.5340           | 0.0000           |
| 41                           | intracellular protein transport                                  | P              | 93              | 415             | 463             | 22.4096         | 89.6328         | 6.3990           | 0.0000           |
| 42                           | metabolism                                                       | P              | 1022            | 6705            | 7938            | 15.2424         | 84.4671         | 10.1070          | 0.0000           |
| 43                           | protein transport                                                | P              | 133             | 589             | 654             | 22.5806         | 90.0612         | 7.8000           | 0.0000           |
| 44                           | cell cycle                                                       | P              | 115             | 629             | 681             | 18.2830         | 92.3642         | 4.7120           | 0.0000           |
| 45                           | ubiquitin cycle                                                  | P              | 96              | 437             | 511             | 21.9680         | 85.5186         | 6.2860           | 0.0000           |
| 46                           | transport                                                        | P              | 386             | 2540            | 2884            | 15.1969         | 88.0721         | 4.9710           | 0.0000           |
| 47                           | protein biosynthesis                                             | P              | 146             | 588             | 801             | 24.8299         | 73.4082         | 9.4900           | 0.0000           |
| 48                           | cell death                                                       | P              | 101             | 603             | 650             | 16.7496         | 92.7692         | 3.4370           | 0.0010           |
| 49                           | purine ribonucleoside salvage                                    | P              | 3               | 3               | 3               | 100.0000        | 100.0000        | 4.6350           | 0.0020           |
| 50                           | protein sumoylation                                              | P              | 4               | 6               | 9               | 66.6667         | 66.6667         | 4.0650           | 0.0020           |
| 51                           | DNA replication                                                  | P              | 32              | 145             | 160             | 22.0690         | 90.6250         | 3.6220           | 0.0020           |
| 52                           | DNA metabolism                                                   | P              | 92              | 543             | 682             | 16.9429         | 79.6188         | 3.3950           | 0.0030           |
| 53                           | tricarboxylic acid cycle                                         | P              | 8               | 24              | 24              | 33.3333         | 100.0000        | 3.1520           | 0.0030           |
| 54                           | cell redox homeostasis                                           | P              | 6               | 14              | 16              | 42.8571         | 87.5000         | 3.4930           | 0.0040           |
| 55                           | chaperone cofactor dependent protein folding                     | P              | 5               | 9               | 10              | 55.5556         | 90.0000         | 3.9630           | 0.0040           |
| 56                           | cell division                                                    | P              | 34              | 168             | 178             | 20.2381         | 94.3820         | 3.1740           | 0.0040           |
| 57                           | ameboidal cell migration                                         | P              | 3               | 4               | 4               | 75.0000         | 100.0000        | 3.8270           | 0.0050           |
| 58                           | Rac protein signal transduction                                  | P              | 4               | 7               | 7               | 57.1429         | 100.0000        | 3.6220           | 0.0050           |
| 59                           | response to unfolded protein                                     | P              | 13              | 46              | 55              | 28.2609         | 83.6364         | 3.3160           | 0.0050           |

|     |                                                                    |   |     |      |      |          |          |        |        |
|-----|--------------------------------------------------------------------|---|-----|------|------|----------|----------|--------|--------|
| 60  | protein targeting                                                  | P | 43  | 227  | 261  | 18.9427  | 86.9732  | 3.0970 | 0.0050 |
| 61  | biological process unknown                                         | P | 57  | 319  | 357  | 17.8683  | 89.3557  | 3.0910 | 0.0050 |
| 62  | apoptotic program                                                  | P | 14  | 56   | 61   | 25.0000  | 91.8033  | 2.9140 | 0.0060 |
| 63  | peroxisome organization and biogenesis                             | P | 6   | 17   | 18   | 35.2941  | 94.4444  | 2.8980 | 0.0060 |
| 64  | DNA-dependent DNA replication                                      | P | 16  | 69   | 73   | 23.1884  | 94.5206  | 2.7760 | 0.0060 |
| 65  | tRNA processing                                                    | P | 11  | 38   | 41   | 28.9474  | 92.6829  | 3.1420 | 0.0060 |
| 66  | regulation of cyclin dependent protein kinase activity             | P | 10  | 35   | 40   | 28.5714  | 87.5000  | 2.9470 | 0.0060 |
| 67  | apoptosis                                                          | P | 94  | 572  | 617  | 16.4336  | 92.7066  | 3.1090 | 0.0060 |
| 68  | RNA catabolism                                                     | P | 9   | 28   | 30   | 32.1429  | 93.3333  | 3.2120 | 0.0070 |
| 69  | regulation of translation                                          | P | 17  | 71   | 76   | 23.9437  | 93.4211  | 3.0110 | 0.0070 |
| 70  | regulation of protein biosynthesis                                 | P | 30  | 148  | 155  | 20.2703  | 95.4839  | 2.9890 | 0.0070 |
| 71  | electron transport                                                 | P | 63  | 386  | 461  | 16.3212  | 83.7310  | 2.4690 | 0.0090 |
| 72  | intra-Golgi vesicle-mediated transport                             | P | 5   | 11   | 12   | 45.4545  | 91.6667  | 3.3590 | 0.0100 |
| 73  | spliceosome assembly                                               | P | 8   | 25   | 30   | 32.0000  | 83.3333  | 3.0130 | 0.0100 |
| 74  | chaperonin-mediated tubulin folding                                | P | 2   | 2    | 2    | 100.0000 | 100.0000 | 3.7840 | 0.0110 |
| 75  | nucleoside metabolism                                              | P | 8   | 27   | 44   | 29.6296  | 61.3636  | 2.7560 | 0.0120 |
| 76  | response to DNA damage stimulus                                    | P | 39  | 223  | 239  | 17.4888  | 93.3054  | 2.4020 | 0.0130 |
| 77  | Golgi organization and biogenesis                                  | P | 4   | 9    | 9    | 44.4444  | 100.0000 | 2.9460 | 0.0130 |
| 78  | aldehyde metabolism                                                | P | 4   | 9    | 10   | 44.4444  | 90.0000  | 2.9460 | 0.0140 |
| 79  | post-Golgi vesicle-mediated transport                              | P | 5   | 13   | 16   | 38.4615  | 81.2500  | 2.8830 | 0.0140 |
| 80  | DNA repair                                                         | P | 34  | 185  | 198  | 18.3784  | 93.4343  | 2.5560 | 0.0140 |
| 81  | copper ion homeostasis                                             | P | 3   | 5    | 5    | 60.0000  | 100.0000 | 3.2560 | 0.0150 |
| 82  | endosome transport                                                 | P | 9   | 32   | 35   | 28.1250  | 91.4286  | 2.7410 | 0.0150 |
| 83  | mRNA catabolism\, nonsense-mediated decay                          | P | 5   | 13   | 14   | 38.4615  | 92.8571  | 2.8830 | 0.0160 |
| 84  | suckling behavior                                                  | P | 2   | 2    | 2    | 100.0000 | 100.0000 | 3.7840 | 0.0170 |
| 85  | regulation of Wnt receptor signaling pathway                       | P | 6   | 18   | 19   | 33.3333  | 94.7368  | 2.7290 | 0.0170 |
| 86  | protein ubiquitination                                             | P | 28  | 147  | 173  | 19.0476  | 84.9711  | 2.5240 | 0.0170 |
| 87  | internal protein amino acid acetylation                            | P | 2   | 2    | 2    | 100.0000 | 100.0000 | 3.7840 | 0.0180 |
| 88  | ceramide metabolism                                                | P | 7   | 24   | 24   | 29.1667  | 100.0000 | 2.5290 | 0.0180 |
| 89  | snRNA export from nucleus                                          | P | 2   | 2    | 2    | 100.0000 | 100.0000 | 3.7840 | 0.0190 |
| 90  | vesicle transport along microtubule                                | P | 3   | 5    | 5    | 60.0000  | 100.0000 | 3.2560 | 0.0190 |
| 91  | glycerol-3-phosphate metabolism                                    | P | 3   | 6    | 8    | 50.0000  | 75.0000  | 2.8200 | 0.0200 |
| 92  | microtubule cytoskeleton organization and biogenesis               | P | 14  | 62   | 69   | 22.5806  | 89.8551  | 2.4850 | 0.0200 |
| 93  | positive regulation of cytotoxic T cell differentiation            | P | 2   | 2    | 2    | 100.0000 | 100.0000 | 3.7840 | 0.0210 |
| 94  | protein desumoylation                                              | P | 2   | 2    | 2    | 100.0000 | 100.0000 | 3.7840 | 0.0220 |
| 95  | small GTPase mediated signal transduction                          | P | 51  | 305  | 344  | 16.7213  | 88.6628  | 2.4040 | 0.0220 |
| 96  | mitochondrion organization and biogenesis                          | P | 8   | 30   | 35   | 26.6667  | 85.7143  | 2.4100 | 0.0230 |
| 97  | pyrimidine nucleotide biosynthesis                                 | P | 6   | 19   | 22   | 31.5790  | 86.3636  | 2.5700 | 0.0240 |
| 98  | germ cell migration                                                | P | 3   | 6    | 6    | 50.0000  | 100.0000 | 2.8200 | 0.0240 |
| 99  | translational elongation                                           | P | 7   | 23   | 28   | 30.4348  | 82.1429  | 2.6610 | 0.0240 |
| 100 | phagocytosis\, engulfment                                          | P | 4   | 10   | 13   | 40.0000  | 76.9231  | 2.6760 | 0.0270 |
| 101 | apoptotic mitochondrial changes                                    | P | 5   | 15   | 16   | 33.3333  | 93.7500  | 2.4910 | 0.0270 |
| 102 | endocytosis                                                        | P | 30  | 167  | 181  | 17.9641  | 92.2652  | 2.2630 | 0.0290 |
| 103 | establishment and/or maintenance of epithelial cell polarity       | P | 3   | 6    | 6    | 50.0000  | 100.0000 | 2.8200 | 0.0300 |
| 104 | fatty acid beta-oxidation                                          | P | 6   | 20   | 20   | 30.0000  | 100.0000 | 2.4220 | 0.0300 |
| 105 | phenylalanyl-tRNA aminoacylation                                   | P | 2   | 3    | 3    | 66.6667  | 100.0000 | 2.8740 | 0.0330 |
| 106 | chromatin remodeling                                               | P | 11  | 48   | 52   | 22.9167  | 92.3077  | 2.2560 | 0.0330 |
| 107 | cell proliferation                                                 | P | 92  | 609  | 648  | 15.1067  | 93.9815  | 2.1920 | 0.0330 |
| 108 | regulation of cell redox homeostasis                               | P | 3   | 6    | 6    | 50.0000  | 100.0000 | 2.8200 | 0.0340 |
| 109 | DNA replication initiation                                         | P | 6   | 21   | 21   | 28.5714  | 100.0000 | 2.2820 | 0.0340 |
| 110 | mitochondrial electron transport\, ubiquinol to cytochrome c       | P | 2   | 3    | 5    | 66.6667  | 60.0000  | 2.8740 | 0.0350 |
| 111 | arginyl-tRNA aminoacylation                                        | P | 2   | 3    | 3    | 66.6667  | 100.0000 | 2.8740 | 0.0370 |
| 112 | vesicle targeting                                                  | P | 4   | 11   | 12   | 36.3636  | 91.6667  | 2.4390 | 0.0380 |
| 113 | membrane fusion                                                    | P | 8   | 31   | 34   | 25.8065  | 91.1765  | 2.3030 | 0.0380 |
| 114 | sphingosine metabolism                                             | P | 2   | 3    | 3    | 66.6667  | 100.0000 | 2.8740 | 0.0390 |
| 115 | nuclear membrane organization and biogenesis                       | P | 2   | 3    | 3    | 66.6667  | 100.0000 | 2.8740 | 0.0390 |
| 116 | ribosomal protein import into nucleus                              | P | 2   | 3    | 3    | 66.6667  | 100.0000 | 2.8740 | 0.0390 |
| 117 | mitosis                                                            | P | 25  | 136  | 146  | 18.3824  | 93.1507  | 2.1890 | 0.0390 |
| 118 | redox signal response                                              | P | 2   | 3    | 3    | 66.6667  | 100.0000 | 2.8740 | 0.0430 |
| 119 | zinc ion homeostasis                                               | P | 3   | 7    | 7    | 42.8571  | 100.0000 | 2.4700 | 0.0430 |
| 120 | negative regulation of tyrosine phosphorylation of Stat3 protein   | P | 2   | 3    | 3    | 66.6667  | 100.0000 | 2.8740 | 0.0440 |
| 121 | mitochondrial fission                                              | P | 2   | 3    | 3    | 66.6667  | 100.0000 | 2.8740 | 0.0440 |
| 122 | regulation of glycolysis                                           | P | 2   | 3    | 3    | 66.6667  | 100.0000 | 2.8740 | 0.0440 |
| 123 | dephosphorylation                                                  | P | 24  | 132  | 149  | 18.1818  | 88.5906  | 2.0860 | 0.0440 |
| 124 | G2 phase of mitotic cell cycle                                     | P | 2   | 3    | 3    | 66.6667  | 100.0000 | 2.8740 | 0.0450 |
| 125 | protein import into mitochondrial inner membrane                   | P | 2   | 3    | 8    | 66.6667  | 37.5000  | 2.8740 | 0.0450 |
| 126 | mitotic spindle assembly                                           | P | 2   | 3    | 4    | 66.6667  | 75.0000  | 2.8740 | 0.0460 |
| 127 | GPI anchor biosynthesis                                            | P | 5   | 17   | 19   | 29.4118  | 89.4737  | 2.1580 | 0.0460 |
| 128 | glucose metabolism                                                 | P | 19  | 100  | 135  | 19.0000  | 74.0741  | 2.0640 | 0.0470 |
| 129 | spindle organization and biogenesis                                | P | 5   | 17   | 20   | 29.4118  | 85.0000  | 2.1580 | 0.0490 |
| 130 | morphogenesis of embryonic epithelium                              | P | 8   | 33   | 33   | 24.2424  | 100.0000 | 2.1020 | 0.0490 |
| 131 | electron carrier activity                                          | F | 24  | 67   | 80   | 35.8209  | 83.7500  | 5.8960 | 0.0000 |
| 132 | ubiquitin-like conjugating enzyme activity                         | F | 5   | 6    | 9    | 83.3333  | 66.6667  | 5.3100 | 0.0000 |
| 133 | purine nucleotide binding                                          | F | 227 | 1505 | 1695 | 15.0831  | 88.7906  | 3.5310 | 0.0000 |
| 134 | translation regulator activity                                     | F | 37  | 127  | 151  | 29.1339  | 84.1060  | 5.8260 | 0.0000 |
| 135 | hydrogen ion transporter activity                                  | F | 29  | 104  | 130  | 27.8846  | 80.0000  | 4.8780 | 0.0000 |
| 136 | protein serine/threonine phosphatase activity                      | F | 13  | 32   | 36   | 40.6250  | 88.8889  | 4.8990 | 0.0000 |
| 137 | threonine endopeptidase activity                                   | F | 9   | 18   | 21   | 50.0000  | 85.7143  | 4.8860 | 0.0000 |
| 138 | NADH dehydrogenase (ubiquinone) activity                           | F | 16  | 27   | 39   | 59.2593  | 69.2308  | 7.4550 | 0.0000 |
| 139 | hydrogen-transporting ATP synthase activity\, rotational mechanism | F | 16  | 43   | 56   | 37.2093  | 76.7857  | 4.9970 | 0.0000 |

|     |                                                                |   |      |      |       |          |          |         |        |
|-----|----------------------------------------------------------------|---|------|------|-------|----------|----------|---------|--------|
| 140 | NADH dehydrogenase activity                                    | F | 18   | 31   | 43    | 58.0645  | 72.0930  | 7.7860  | 0.0000 |
| 141 | hydrogen-transporting ATPase activity\, rotational mechanism   | F | 17   | 45   | 58    | 37.7778  | 77.5862  | 5.2290  | 0.0000 |
| 142 | translation initiation factor activity                         | F | 22   | 66   | 86    | 33.3333  | 76.7442  | 5.2340  | 0.0000 |
| 143 | structural molecule activity                                   | F | 115  | 632  | 893   | 18.1962  | 70.7727  | 4.6560  | 0.0000 |
| 144 | isomerase activity                                             | F | 31   | 136  | 153   | 22.7941  | 88.8889  | 3.7650  | 0.0000 |
| 145 | protein transporter activity                                   | F | 30   | 120  | 132   | 25.0000  | 90.9091  | 4.2750  | 0.0000 |
| 146 | catalytic activity                                             | F | 697  | 4686 | 5420  | 14.8741  | 86.4576  | 6.6220  | 0.0000 |
| 147 | unfolded protein binding                                       | F | 41   | 146  | 159   | 28.0822  | 91.8239  | 5.8610  | 0.0000 |
| 148 | structural constituent of ribosome                             | F | 75   | 183  | 354   | 40.9836  | 51.6949  | 11.9260 | 0.0000 |
| 149 | binding                                                        | F | 1206 | 9101 | 10565 | 13.2513  | 86.1429  | 4.6900  | 0.0000 |
| 150 | RNA binding                                                    | F | 116  | 466  | 548   | 24.8927  | 85.0365  | 8.4540  | 0.0000 |
| 151 | hydrolase activity                                             | F | 278  | 1924 | 2234  | 14.4491  | 86.1235  | 3.1480  | 0.0000 |
| 152 | nucleotide binding                                             | F | 282  | 1750 | 1959  | 16.1143  | 89.3313  | 5.2450  | 0.0000 |
| 153 | protein binding                                                | F | 672  | 4715 | 5185  | 14.2524  | 90.9354  | 5.0730  | 0.0000 |
| 154 | protein phosphatase type 1 activity                            | F | 6    | 9    | 10    | 66.6667  | 90.0000  | 4.9790  | 0.0010 |
| 155 | nucleoside-triphosphatase activity                             | F | 84   | 498  | 565   | 16.8675  | 88.1416  | 3.1930  | 0.0010 |
| 156 | ubiquitin conjugating enzyme activity                          | F | 10   | 33   | 38    | 30.3030  | 86.8421  | 3.1650  | 0.0010 |
| 157 | molecular function unknown                                     | F | 73   | 404  | 455   | 18.0693  | 88.7912  | 3.6140  | 0.0010 |
| 158 | oxidoreductase activity                                        | F | 105  | 662  | 775   | 15.8610  | 85.4194  | 2.8950  | 0.0010 |
| 159 | SUMO conjugating enzyme activity                               | F | 3    | 3    | 6     | 100.0000 | 50.0000  | 4.6350  | 0.0020 |
| 160 | nucleotidyltransferase activity                                | F | 23   | 105  | 117   | 21.9048  | 89.7436  | 3.0260  | 0.0020 |
| 161 | RNA splicing factor activity\, transesterification mechanism   | F | 8    | 20   | 23    | 40.0000  | 86.9565  | 3.7860  | 0.0020 |
| 162 | DNA-directed RNA polymerase activity                           | F | 11   | 32   | 36    | 34.3750  | 88.8889  | 3.8200  | 0.0020 |
| 163 | ligase activity                                                | F | 69   | 382  | 449   | 18.0628  | 85.0780  | 3.5070  | 0.0020 |
| 164 | ubiquitin-protein ligase activity                              | F | 44   | 219  | 259   | 20.0913  | 84.5560  | 3.5630  | 0.0020 |
| 165 | GTP binding                                                    | F | 53   | 301  | 335   | 17.6080  | 89.8508  | 2.8620  | 0.0020 |
| 166 | acetyl-CoA C-acyltransferase activity                          | F | 3    | 3    | 3     | 100.0000 | 100.0000 | 4.6350  | 0.0030 |
| 167 | hydrolase activity\, acting on acid anhydrides\                | F | 28   | 136  | 161   | 20.5882  | 84.4721  | 2.9770  | 0.0040 |
| 168 | electron transporter activity                                  | F | 32   | 175  | 195   | 18.2857  | 89.7436  | 2.4480  | 0.0040 |
| 169 | ATP binding                                                    | F | 175  | 1180 | 1331  | 14.8305  | 88.6551  | 2.8130  | 0.0040 |
| 170 | insulin-like growth factor receptor binding                    | F | 4    | 7    | 7     | 57.1429  | 100.0000 | 3.6220  | 0.0050 |
| 171 | phosphoinositide binding                                       | F | 15   | 58   | 64    | 25.8621  | 90.6250  | 3.1660  | 0.0050 |
| 172 | intracellular transporter activity                             | F | 8    | 24   | 28    | 33.3333  | 85.7143  | 3.1520  | 0.0060 |
| 173 | ATPase activity\, coupled to transmem. movement of substances  | F | 27   | 134  | 158   | 20.1493  | 84.8101  | 2.8000  | 0.0060 |
| 174 | tRNA binding                                                   | F | 6    | 14   | 22    | 42.8571  | 63.6364  | 3.4930  | 0.0070 |
| 175 | rRNA binding                                                   | F | 6    | 15   | 18    | 40.0000  | 83.3333  | 3.2790  | 0.0080 |
| 176 | cytochrome-c oxidase activity                                  | F | 7    | 21   | 27    | 33.3333  | 77.7778  | 2.9480  | 0.0080 |
| 177 | dynein binding                                                 | F | 3    | 4    | 5     | 75.0000  | 80.0000  | 3.8270  | 0.0090 |
| 178 | TPR domain binding                                             | F | 2    | 2    | 2     | 100.0000 | 100.0000 | 3.7840  | 0.0100 |
| 179 | 4 iron\, 4 sulfur cluster binding                              | F | 5    | 13   | 13    | 38.4615  | 100.0000 | 2.8830  | 0.0100 |
| 180 | cholesterol delta-isomerase activity                           | F | 2    | 2    | 2     | 100.0000 | 100.0000 | 3.7840  | 0.0110 |
| 181 | disulfide oxidoreductase activity                              | F | 6    | 17   | 19    | 35.2941  | 89.4737  | 2.8980  | 0.0110 |
| 182 | ATPase activity\, coupled                                      | F | 47   | 266  | 301   | 17.6692  | 88.3721  | 2.7180  | 0.0110 |
| 183 | syntaxin binding                                               | F | 5    | 11   | 13    | 45.4545  | 84.6154  | 3.3590  | 0.0110 |
| 184 | translation release factor activity                            | F | 3    | 5    | 5     | 60.0000  | 100.0000 | 3.2560  | 0.0120 |
| 185 | pseudouridylate synthase activity                              | F | 4    | 9    | 11    | 44.4444  | 81.8182  | 2.9460  | 0.0120 |
| 186 | ATPase activity                                                | F | 53   | 312  | 360   | 16.9872  | 86.6667  | 2.5770  | 0.0120 |
| 187 | hydrogen-exporting ATPase activity\, phosphorylative mechanism | F | 7    | 23   | 27    | 30.4348  | 85.1852  | 2.6610  | 0.0130 |
| 188 | thiol-disulfide exchange intermediate activity                 | F | 3    | 5    | 5     | 60.0000  | 100.0000 | 3.2560  | 0.0140 |
| 189 | ceramide glucosyltransferase activity                          | F | 2    | 2    | 2     | 100.0000 | 100.0000 | 3.7840  | 0.0150 |
| 190 | dephospho-CoA kinase activity                                  | F | 2    | 2    | 2     | 100.0000 | 100.0000 | 3.7840  | 0.0160 |
| 191 | protein phosphatase type 2A regulator activity                 | F | 5    | 14   | 14    | 35.7143  | 100.0000 | 2.6780  | 0.0160 |
| 192 | long-chain-acyl-CoA dehydrogenase activity                     | F | 2    | 2    | 2     | 100.0000 | 100.0000 | 3.7840  | 0.0170 |
| 193 | acetyl-CoA C-acetyltransferase activity                        | F | 3    | 5    | 5     | 60.0000  | 100.0000 | 3.2560  | 0.0170 |
| 194 | 6-phosphogluconolactonase activity                             | F | 2    | 2    | 3     | 100.0000 | 66.6667  | 3.7840  | 0.0180 |
| 195 | Ral GTPase binding                                             | F | 2    | 2    | 2     | 100.0000 | 100.0000 | 3.7840  | 0.0180 |
| 196 | protein phosphatase type 2C activity                           | F | 4    | 9    | 10    | 44.4444  | 90.0000  | 2.9460  | 0.0220 |
| 197 | myosin phosphatase activity                                    | F | 3    | 5    | 5     | 60.0000  | 100.0000 | 3.2560  | 0.0230 |
| 198 | translation release factor activity\, codon specific           | F | 2    | 3    | 3     | 66.6667  | 100.0000 | 2.8740  | 0.0290 |
| 199 | transferase activity                                           | F | 217  | 1559 | 1757  | 13.9192  | 88.7308  | 2.1190  | 0.0320 |
| 200 | phenylalanine-tRNA ligase activity                             | F | 2    | 3    | 3     | 66.6667  | 100.0000 | 2.8740  | 0.0330 |
| 201 | protein phosphatase type 1 regulator activity                  | F | 2    | 3    | 3     | 66.6667  | 100.0000 | 2.8740  | 0.0330 |
| 202 | arginine-tRNA ligase activity                                  | F | 2    | 3    | 3     | 66.6667  | 100.0000 | 2.8740  | 0.0370 |
| 203 | protein phosphatase type 2A activity                           | F | 3    | 6    | 6     | 50.0000  | 100.0000 | 2.8200  | 0.0380 |
| 204 | phosphoric monoester hydrolase activity                        | F | 36   | 211  | 239   | 17.0616  | 88.2845  | 2.1450  | 0.0380 |
| 205 | racemase and epimerase activity\                               | F | 2    | 3    | 3     | 66.6667  | 100.0000 | 2.8740  | 0.0390 |
| 206 | Wnt-protein binding                                            | F | 2    | 3    | 3     | 66.6667  | 100.0000 | 2.8740  | 0.0410 |
| 207 | cAMP-dependent protein kinase activity                         | F | 2    | 3    | 3     | 66.6667  | 100.0000 | 2.8740  | 0.0410 |
| 208 | 6-phosphofructokinase activity                                 | F | 2    | 3    | 3     | 66.6667  | 100.0000 | 2.8740  | 0.0420 |
| 209 | CTD phosphatase activity                                       | F | 3    | 6    | 6     | 50.0000  | 100.0000 | 2.8200  | 0.0420 |
| 210 | isocitrate dehydrogenase (NAD+) activity                       | F | 2    | 3    | 3     | 66.6667  | 100.0000 | 2.8740  | 0.0430 |
| 211 | hematopoietin/interferon-class (D200-domain) cytokine receptor | F | 2    | 3    | 3     | 66.6667  | 100.0000 | 2.8740  | 0.0440 |
| 212 | ribosome binding                                               | F | 3    | 7    | 7     | 42.8571  | 100.0000 | 2.4700  | 0.0470 |
| 213 | single-stranded DNA binding                                    | F | 7    | 28   | 32    | 25.0000  | 87.5000  | 2.0590  | 0.0470 |
| 214 | mitochondrial envelope                                         | C | 73   | 280  | 329   | 26.0714  | 85.1064  | 7.1180  | 0.0000 |
| 215 | large ribosomal subunit                                        | C | 14   | 29   | 42    | 48.2759  | 69.0476  | 5.9210  | 0.0000 |
| 216 | dynactin complex                                               | C | 5    | 6    | 7     | 83.3333  | 85.7143  | 5.3100  | 0.0000 |
| 217 | small ribosomal subunit                                        | C | 17   | 32   | 45    | 53.1250  | 71.1111  | 7.0580  | 0.0000 |
| 218 | respiratory chain complex I (sensu Eukaryota)                  | C | 6    | 8    | 14    | 75.0000  | 57.1429  | 5.4130  | 0.0000 |
| 219 | mitochondrial electron transport chain                         | C | 13   | 30   | 40    | 43.3333  | 75.0000  | 5.1960  | 0.0000 |

|     |                                                                 |   |      |      |      |          |          |         |        |
|-----|-----------------------------------------------------------------|---|------|------|------|----------|----------|---------|--------|
| 220 | signalosome complex                                             | C | 6    | 9    | 10   | 66.6667  | 90.0000  | 4.9790  | 0.0000 |
| 221 | mitochondrial small ribosomal subunit                           | C | 6    | 9    | 9    | 66.6667  | 100.0000 | 4.9790  | 0.0000 |
| 222 | proteasome complex (sensu Eukaryota)                            | C | 18   | 37   | 42   | 48.6487  | 88.0952  | 6.7590  | 0.0000 |
| 223 | mitochondrial ribosome                                          | C | 17   | 35   | 37   | 48.5714  | 94.5946  | 6.5600  | 0.0000 |
| 224 | nuclear envelope                                                | C | 24   | 97   | 111  | 24.7423  | 87.3874  | 3.7630  | 0.0000 |
| 225 | proteasome core complex (sensu Eukaryota)                       | C | 9    | 18   | 21   | 50.0000  | 85.7143  | 4.8860  | 0.0000 |
| 226 | mitochondrial matrix                                            | C | 26   | 74   | 76   | 35.1351  | 97.3684  | 6.0170  | 0.0000 |
| 227 | endosome                                                        | C | 25   | 96   | 104  | 26.0417  | 92.3077  | 4.1330  | 0.0000 |
| 228 | proton-transporting two-sector ATPase complex                   | C | 18   | 47   | 61   | 38.2979  | 77.0492  | 5.4530  | 0.0000 |
| 229 | protein complex                                                 | C | 383  | 1750 | 2202 | 21.8857  | 79.4732  | 13.0880 | 0.0000 |
| 230 | nucleolus                                                       | C | 41   | 133  | 147  | 30.8271  | 90.4762  | 6.5610  | 0.0000 |
| 231 | Golgi apparatus                                                 | C | 80   | 435  | 471  | 18.3908  | 92.3567  | 3.9620  | 0.0000 |
| 232 | ribonucleoprotein complex                                       | C | 122  | 355  | 550  | 34.3662  | 64.5455  | 12.8600 | 0.0000 |
| 233 | mitochondrial inner membrane                                    | C | 62   | 232  | 275  | 26.7241  | 84.3636  | 6.7740  | 0.0000 |
| 234 | ribosome                                                        | C | 73   | 176  | 345  | 41.4773  | 51.0145  | 11.8930 | 0.0000 |
| 235 | cytosol                                                         | C | 78   | 344  | 383  | 22.6744  | 89.8172  | 5.9630  | 0.0000 |
| 236 | endoplasmic reticulum                                           | C | 94   | 528  | 561  | 17.8030  | 94.1177  | 3.9590  | 0.0000 |
| 237 | intracellular                                                   | C | 1151 | 6933 | 8118 | 16.6018  | 85.4028  | 15.1710 | 0.0000 |
| 238 | mitochondrion                                                   | C | 195  | 730  | 822  | 26.7123  | 88.8078  | 12.2180 | 0.0000 |
| 239 | cytoplasm                                                       | C | 698  | 3484 | 3969 | 20.0344  | 87.7803  | 16.0260 | 0.0000 |
| 240 | nucleus                                                         | C | 498  | 3274 | 3798 | 15.2108  | 86.2033  | 5.8490  | 0.0000 |
| 241 | exocyst                                                         | C | 5    | 6    | 6    | 83.3333  | 100.0000 | 5.3100  | 0.0010 |
| 242 | small nucleolar ribonucleoprotein complex                       | C | 10   | 24   | 32   | 41.6667  | 75.0000  | 4.3970  | 0.0010 |
| 243 | protein serine/threonine phosphatase complex                    | C | 9    | 26   | 29   | 34.6154  | 89.6552  | 3.4800  | 0.0020 |
| 244 | DNA-directed RNA polymerase I complex                           | C | 4    | 5    | 5    | 80.0000  | 100.0000 | 4.6200  | 0.0020 |
| 245 | nucleoplasm                                                     | C | 60   | 343  | 376  | 17.4927  | 91.2234  | 2.9930  | 0.0020 |
| 246 | nuclear pore                                                    | C | 13   | 40   | 46   | 32.5000  | 86.9565  | 3.9100  | 0.0020 |
| 247 | muscle thin filament tropomyosin                                | C | 3    | 3    | 4    | 100.0000 | 75.0000  | 4.6350  | 0.0030 |
| 248 | vesicle membrane                                                | C | 18   | 76   | 82   | 23.6842  | 92.6829  | 3.0460  | 0.0030 |
| 249 | cytosolic large ribosomal subunit (sensu Eukaryota)             | C | 6    | 13   | 18   | 46.1539  | 72.2222  | 3.7290  | 0.0030 |
| 250 | nuclear matrix                                                  | C | 7    | 18   | 19   | 38.8889  | 94.7368  | 3.4480  | 0.0030 |
| 251 | Golgi stack                                                     | C | 52   | 289  | 310  | 17.9931  | 93.2258  | 3.0040  | 0.0040 |
| 252 | cyclin-dependent protein kinase holoenzyme complex              | C | 4    | 7    | 7    | 57.1429  | 100.0000 | 3.6220  | 0.0050 |
| 253 | coated pit                                                      | C | 11   | 38   | 38   | 28.9474  | 100.0000 | 3.1420  | 0.0050 |
| 254 | nuclear lamina                                                  | C | 5    | 9    | 9    | 55.5556  | 100.0000 | 3.9630  | 0.0060 |
| 255 | nuclear inner membrane                                          | C | 5    | 11   | 13   | 45.4545  | 84.6154  | 3.3590  | 0.0060 |
| 256 | cytosolic small ribosomal subunit (sensu Eukaryota)             | C | 6    | 14   | 16   | 42.8571  | 87.5000  | 3.4930  | 0.0060 |
| 257 | endoplasmic reticulum membrane                                  | C | 23   | 104  | 109  | 22.1154  | 95.4128  | 3.0770  | 0.0060 |
| 258 | spliceosome complex                                             | C | 17   | 71   | 78   | 23.9437  | 91.0256  | 3.0110  | 0.0060 |
| 259 | cell cortex                                                     | C | 11   | 41   | 44   | 26.8293  | 93.1818  | 2.8500  | 0.0070 |
| 260 | mitochondrial large ribosomal subunit                           | C | 5    | 12   | 14   | 41.6667  | 85.7143  | 3.1080  | 0.0070 |
| 261 | Golgi transport complex                                         | C | 3    | 4    | 4    | 75.0000  | 100.0000 | 3.8270  | 0.0080 |
| 262 | glycerol-3-phosphate dehydrogenase complex                      | C | 2    | 2    | 4    | 100.0000 | 50.0000  | 3.7840  | 0.0090 |
| 263 | proton-transporting ATP synthase complex\, coupling factor F(o) | C | 4    | 8    | 13   | 50.0000  | 61.5385  | 3.2560  | 0.0110 |
| 264 | spindle midzone                                                 | C | 2    | 2    | 2    | 100.0000 | 100.0000 | 3.7840  | 0.0120 |
| 265 | mediator complex                                                | C | 7    | 22   | 24   | 31.8182  | 91.6667  | 2.8000  | 0.0140 |
| 266 | clathrin vesicle coat                                           | C | 10   | 36   | 40   | 27.7778  | 90.0000  | 2.8440  | 0.0140 |
| 267 | collagen type VI                                                | C | 2    | 2    | 2    | 100.0000 | 100.0000 | 3.7840  | 0.0170 |
| 268 | protein phosphatase type 2A complex                             | C | 5    | 13   | 13   | 38.4615  | 100.0000 | 2.8830  | 0.0180 |
| 269 | lamin filament                                                  | C | 3    | 5    | 5    | 60.0000  | 100.0000 | 3.2560  | 0.0190 |
| 270 | peroxisome                                                      | C | 15   | 68   | 71   | 22.0588  | 95.7747  | 2.4710  | 0.0200 |
| 271 | endoplasmic reticulum lumen                                     | C | 5    | 14   | 14   | 35.7143  | 100.0000 | 2.6780  | 0.0210 |
| 272 | eukaryotic translation initiation factor 4F complex             | C | 3    | 5    | 5    | 60.0000  | 100.0000 | 3.2560  | 0.0220 |
| 273 | proton-transporting ATP synthase complex\, catalytic core F(1)  | C | 3    | 6    | 6    | 50.0000  | 100.0000 | 2.8200  | 0.0240 |
| 274 | cytoplasmic dynein complex                                      | C | 3    | 6    | 7    | 50.0000  | 85.7143  | 2.8200  | 0.0240 |
| 275 | ruffle                                                          | C | 7    | 23   | 26   | 30.4348  | 88.4615  | 2.6610  | 0.0280 |
| 276 | cellular component unknown                                      | C | 60   | 368  | 404  | 16.3044  | 91.0891  | 2.3990  | 0.0280 |
| 277 | outer membrane                                                  | C | 15   | 69   | 75   | 21.7391  | 92.0000  | 2.4080  | 0.0290 |
| 278 | nuclear inclusion body                                          | C | 2    | 3    | 3    | 66.6667  | 100.0000 | 2.8740  | 0.0310 |
| 279 | NuRD complex                                                    | C | 3    | 7    | 9    | 42.8571  | 77.7778  | 2.4700  | 0.0330 |
| 280 | peroxisomal membrane                                            | C | 6    | 21   | 22   | 28.5714  | 95.4545  | 2.2820  | 0.0340 |
| 281 | Golgi cis-face                                                  | C | 3    | 7    | 9    | 42.8571  | 77.7778  | 2.4700  | 0.0350 |
| 282 | DNA replication factor C complex                                | C | 2    | 3    | 4    | 66.6667  | 75.0000  | 2.8740  | 0.0380 |
| 283 | polytene chromosome chromocenter                                | C | 2    | 3    | 5    | 66.6667  | 60.0000  | 2.8740  | 0.0400 |
| 284 | translocon complex                                              | C | 2    | 3    | 3    | 66.6667  | 100.0000 | 2.8740  | 0.0410 |
| 285 | 6-phosphofructokinase complex                                   | C | 2    | 3    | 3    | 66.6667  | 100.0000 | 2.8740  | 0.0420 |
| 286 | replication fork                                                | C | 6    | 22   | 24   | 27.2727  | 91.6667  | 2.1500  | 0.0420 |
| 287 | mitochondrial intermembrane space protein transporter complex   | C | 2    | 3    | 8    | 66.6667  | 37.5000  | 2.8740  | 0.0450 |
| 288 | COPI-coated vesicle                                             | C | 3    | 8    | 8    | 37.5000  | 100.0000 | 2.1780  | 0.0450 |
| 289 | anaphase-promoting complex                                      | C | 4    | 11   | 14   | 36.3636  | 78.5714  | 2.4390  | 0.0450 |
| 290 | ubiquitin ligase complex                                        | C | 27   | 152  | 182  | 17.7632  | 83.5165  | 2.0820  | 0.0490 |

DOWN-REGULATED - GENMAPP

| No. | MAPP Name                                         | Number Changed | Number Measured | Number on MAPP | Percent Changed | Percent Present | Z Score | Permuted P Value |
|-----|---------------------------------------------------|----------------|-----------------|----------------|-----------------|-----------------|---------|------------------|
| 1   | Mm_T-Cell-Receptor_NetPath_11                     | 31             | 124             | 126            | 25.0000         | 98.4127         | 6.5360  | 0.0000           |
| 2   | Mm_B_Cell_Receptor_NetPath_12                     | 31             | 147             | 150            | 21.0884         | 98.0000         | 5.4230  | 0.0000           |
| 3   | Mm_TNF-alpha-NF-kB_NetPath_9                      | 33             | 166             | 176            | 19.8795         | 94.3182         | 5.2130  | 0.0000           |
| 4   | Mm_Ribosomal_Proteins                             | 18             | 78              | 80             | 23.0769         | 97.5000         | 4.5470  | 0.0000           |
| 5   | Mm_Signaling_of_Hepatocyte_Growth_Factor_Receptor | 9              | 30              | 34             | 30.0000         | 88.2353         | 4.1540  | 0.0010           |
| 6   | Mm_IL-3_NetPath_15                                | 19             | 95              | 96             | 20.0000         | 98.9583         | 3.9520  | 0.0010           |

|    |                                         |    |     |     |         |          |        |        |
|----|-----------------------------------------|----|-----|-----|---------|----------|--------|--------|
| 7  | Mm_IL-5_NetPath_17                      | 14 | 62  | 66  | 22.5806 | 93.9394  | 3.9070 | 0.0010 |
| 8  | Mm_IL-2_NetPath_14                      | 15 | 72  | 73  | 20.8333 | 98.6301  | 3.6850 | 0.0010 |
| 9  | Mm_Integrin-mediated_cell_adhesion_KEGG | 17 | 90  | 98  | 18.8889 | 91.8367  | 3.4670 | 0.0010 |
| 10 | Mm_IL-1_NetPath_13                      | 9  | 37  | 37  | 24.3243 | 100.0000 | 3.3870 | 0.0030 |
| 11 | Mm_Focal_adhesion_KEGG                  | 26 | 181 | 190 | 14.3646 | 95.2632  | 2.7640 | 0.0030 |
| 12 | Mm_EGFR1_NetPath_4                      | 26 | 166 | 171 | 15.6627 | 97.0760  | 3.2470 | 0.0040 |
| 13 | Mm_IL-6_NetPath_18                      | 17 | 96  | 97  | 17.7083 | 98.9691  | 3.1680 | 0.0040 |
| 14 | Mm_Kit-Receptor_NetPath_6               | 13 | 64  | 65  | 20.3125 | 98.4615  | 3.3220 | 0.0060 |
| 15 | Mm_MAPK_signaling_pathway_KEGG          | 21 | 131 | 136 | 16.0305 | 96.3235  | 3.0240 | 0.0060 |
| 16 | Mm_MAPK_Cascade                         | 7  | 27  | 29  | 25.9259 | 93.1035  | 3.1860 | 0.0110 |
| 17 | Mm_TGF_Beta_Signaling_Pathway           | 9  | 50  | 51  | 18.0000 | 98.0392  | 2.3480 | 0.0170 |
| 18 | Mm_IL-4_NetPath_16                      | 10 | 55  | 59  | 18.1818 | 93.2203  | 2.5120 | 0.0180 |
| 19 | Mm_IL-7_NetPath_19                      | 8  | 42  | 43  | 19.0476 | 97.6744  | 2.3920 | 0.0220 |
| 20 | Mm_S1P_Signaling                        | 5  | 21  | 22  | 23.8095 | 95.4545  | 2.4630 | 0.0300 |
| 21 | Mm_Insulin_Signaling                    | 21 | 152 | 159 | 13.8158 | 95.5975  | 2.2790 | 0.0360 |
| 22 | Mm_1-Tissue-Blood_and_Lymph             | 4  | 16  | 17  | 25.0000 | 94.1177  | 2.3180 | 0.0380 |
| 23 | Mm_ESC_Pluripotency_Pathways            | 15 | 106 | 109 | 14.1509 | 97.2477  | 2.0170 | 0.0410 |
| 24 | Mm_Aminosugars_metabolism               | 5  | 24  | 50  | 20.8333 | 48.0000  | 2.1150 | 0.0430 |
| 25 | Mm_IL-9_NetPath_20                      | 5  | 23  | 24  | 21.7391 | 95.8333  | 2.2250 | 0.0470 |

#### DOWN-REGULATED - GENE ONTOLOGY

| No. | GO Name                                                          | GO Type | Number Changed | Number Measured | Number in GO | Percent Changed | Percent Present | Z Score | Permuted P Value |
|-----|------------------------------------------------------------------|---------|----------------|-----------------|--------------|-----------------|-----------------|---------|------------------|
| 1   | antigen processing                                               | P       | 11             | 35              | 44           | 31.4286         | 79.5455         | 5.3800  | 0.0000           |
| 2   | cellular physiological process                                   | P       | 749            | 8916            | 10403        | 8.4006          | 85.7061         | 5.1260  | 0.0000           |
| 3   | protein metabolism                                               | P       | 264            | 2842            | 3423         | 9.2892          | 83.0266         | 4.0250  | 0.0000           |
| 4   | humoral immune response                                          | P       | 22             | 134             | 142          | 16.4179         | 94.3662         | 3.9360  | 0.0000           |
| 5   | protein kinase cascade                                           | P       | 45             | 305             | 322          | 14.7541         | 94.7205         | 4.8580  | 0.0000           |
| 6   | I-kappaB kinase/NF-kappaB cascade                                | P       | 20             | 95              | 100          | 21.0526         | 95.0000         | 5.0300  | 0.0000           |
| 7   | humoral defense mechanism (sensu Vertebrata)                     | P       | 18             | 93              | 101          | 19.3548         | 92.0792         | 4.3530  | 0.0000           |
| 8   | vesicle-mediated transport                                       | P       | 48             | 379             | 406          | 12.6649         | 93.3498         | 3.8650  | 0.0000           |
| 9   | defense response                                                 | P       | 90             | 828             | 915          | 10.8696         | 90.4918         | 3.7860  | 0.0000           |
| 10  | positive regulation of I-kappaB kinase/NF-kappaB cascade         | P       | 14             | 56              | 61           | 25.0000         | 91.8033         | 4.9800  | 0.0000           |
| 11  | protein transport                                                | P       | 66             | 589             | 654          | 11.2054         | 90.0612         | 3.4820  | 0.0000           |
| 12  | immune response                                                  | P       | 81             | 731             | 793          | 11.0807         | 92.1816         | 3.7670  | 0.0000           |
| 13  | intracellular signaling cascade                                  | P       | 124            | 1104            | 1204         | 11.2319         | 91.6944         | 4.8910  | 0.0000           |
| 14  | peroxisome fission                                               | P       | 3              | 4               | 4            | 75.0000         | 100.0000        | 5.1250  | 0.0010           |
| 15  | cell death                                                       | P       | 64             | 603             | 650          | 10.6136         | 92.7692         | 2.9620  | 0.0010           |
| 16  | protein modification                                             | P       | 147            | 1476            | 1665         | 9.9594          | 88.6487         | 3.7780  | 0.0010           |
| 17  | metabolism                                                       | P       | 568            | 6705            | 7938         | 8.4713          | 84.4671         | 4.0810  | 0.0010           |
| 18  | phosphate metabolism                                             | P       | 84             | 790             | 902          | 10.6329         | 87.5832         | 3.4340  | 0.0020           |
| 19  | phosphorylation                                                  | P       | 70             | 648             | 743          | 10.8025         | 87.2140         | 3.2620  | 0.0020           |
| 20  | microtubule nucleation                                           | P       | 4              | 8               | 9            | 50.0000         | 88.8889         | 4.5640  | 0.0020           |
| 21  | sequestering of lipid                                            | P       | 4              | 9               | 9            | 44.4444         | 100.0000        | 4.2080  | 0.0020           |
| 22  | antigen presentation                                             | P       | 11             | 52              | 63           | 21.1539         | 82.5397         | 3.7440  | 0.0020           |
| 23  | transmembrane receptor protein tyrosine kinase signaling pathway | P       | 23             | 162             | 172          | 14.1975         | 94.1860         | 3.2530  | 0.0020           |
| 24  | histone phosphorylation                                          | P       | 2              | 2               | 2            | 100.0000        | 100.0000        | 4.9660  | 0.0030           |
| 25  | cell organization and biogenesis                                 | P       | 155            | 1659            | 1897         | 9.3430          | 87.4539         | 3.0210  | 0.0030           |
| 26  | antigen presentation\, exogenous antigen via MHC class II        | P       | 4              | 10              | 12           | 40.0000         | 83.3333         | 3.9020  | 0.0030           |
| 27  | small GTPase mediated signal transduction                        | P       | 37             | 305             | 344          | 12.1312         | 88.6628         | 3.1010  | 0.0030           |
| 28  | protein amino acid phosphorylation                               | P       | 62             | 560             | 622          | 11.0714         | 90.0322         | 3.2690  | 0.0030           |
| 29  | positive regulation of long-term neuronal synaptic plasticity    | P       | 2              | 2               | 3            | 100.0000        | 66.6667         | 4.9660  | 0.0040           |
| 30  | response to antibiotic                                           | P       | 2              | 2               | 3            | 100.0000        | 66.6667         | 4.9660  | 0.0040           |
| 31  | aromatic amino acid family biosynthesis                          | P       | 2              | 2               | 2            | 100.0000        | 100.0000        | 4.9660  | 0.0040           |
| 32  | cholesterol transport                                            | P       | 4              | 9               | 9            | 44.4444         | 100.0000        | 4.2080  | 0.0040           |
| 33  | cholesterol homeostasis                                          | P       | 4              | 11              | 11           | 36.3636         | 100.0000        | 3.6350  | 0.0040           |
| 34  | antigen processing\, exogenous antigen via MHC class II          | P       | 4              | 9               | 13           | 44.4444         | 69.2308         | 4.2080  | 0.0050           |
| 35  | lipid transport                                                  | P       | 12             | 68              | 76           | 17.6471         | 89.4737         | 3.1830  | 0.0050           |
| 36  | apoptosis                                                        | P       | 60             | 572             | 617          | 10.4895         | 92.7066         | 2.7660  | 0.0050           |
| 37  | ATP-dependent proteolysis                                        | P       | 3              | 5               | 7            | 60.0000         | 71.4286         | 4.4570  | 0.0060           |
| 38  | antigen presentation\, endogenous antigen                        | P       | 6              | 22              | 25           | 27.2727         | 88.0000         | 3.5230  | 0.0060           |
| 39  | antimicrobial humoral response (sensu Vertebrata)                | P       | 9              | 48              | 51           | 18.7500         | 94.1177         | 2.9630  | 0.0060           |
| 40  | endocytosis                                                      | P       | 22             | 167             | 181          | 13.1737         | 92.2652         | 2.7980  | 0.0080           |
| 41  | intracellular protein transport                                  | P       | 47             | 415             | 463          | 11.3253         | 89.6328         | 2.9990  | 0.0080           |
| 42  | negative regulation of anti-apoptosis                            | P       | 2              | 2               | 2            | 100.0000        | 100.0000        | 4.9660  | 0.0090           |
| 43  | regulation of neuronal synaptic plasticity                       | P       | 3              | 7               | 9            | 42.8571         | 77.7778         | 3.5520  | 0.0110           |
| 44  | integrin-mediated signaling pathway                              | P       | 11             | 68              | 77           | 16.1765         | 88.3117         | 2.7220  | 0.0110           |
| 45  | peptidyl-serine phosphorylation                                  | P       | 3              | 6               | 6            | 50.0000         | 100.0000        | 3.9520  | 0.0120           |
| 46  | intra-Golgi vesicle-mediated transport                           | P       | 4              | 11              | 12           | 36.3636         | 91.6667         | 3.6350  | 0.0120           |
| 47  | B cell receptor signaling pathway                                | P       | 3              | 7               | 7            | 42.8571         | 100.0000        | 3.5520  | 0.0160           |
| 48  | cytoskeleton organization and biogenesis                         | P       | 41             | 385             | 431          | 10.6494         | 89.3272         | 2.3750  | 0.0160           |
| 49  | antigen processing\, endogenous antigen via MHC class I          | P       | 5              | 20              | 23           | 25.0000         | 86.9565         | 2.9720  | 0.0170           |
| 50  | regulation of fatty acid metabolism                              | P       | 3              | 8               | 8            | 37.5000         | 100.0000        | 3.2220  | 0.0180           |
| 51  | response to stress                                               | P       | 96             | 1014            | 1107         | 9.4675          | 91.5989         | 2.4620  | 0.0180           |
| 52  | MAPKKK cascade                                                   | P       | 17             | 131             | 140          | 12.9771         | 93.5714         | 2.3890  | 0.0210           |
| 53  | heart development                                                | P       | 14             | 101             | 104          | 13.8614         | 97.1154         | 2.4340  | 0.0220           |
| 54  | sperm axoneme assembly                                           | P       | 2              | 4               | 4            | 50.0000         | 100.0000        | 3.2270  | 0.0270           |
| 55  | mannose metabolism                                               | P       | 3              | 9               | 9            | 33.3333         | 100.0000        | 2.9430  | 0.0290           |
| 56  | telomere maintenance                                             | P       | 5              | 24              | 28           | 20.8333         | 85.7143         | 2.4810  | 0.0300           |
| 57  | regulation of muscle contraction                                 | P       | 6              | 33              | 36           | 18.1818         | 91.6667         | 2.3310  | 0.0310           |
| 58  | peptidyl-threonine phosphorylation                               | P       | 2              | 4               | 4            | 50.0000         | 100.0000        | 3.2270  | 0.0330           |

|     |                                                                |   |     |      |       |          |          |        |        |
|-----|----------------------------------------------------------------|---|-----|------|-------|----------|----------|--------|--------|
| 59  | glial cell migration                                           | P | 2   | 4    | 4     | 50.0000  | 100.0000 | 3.2270 | 0.0330 |
| 60  | release of sequestered calcium ion into cytosol                | P | 2   | 4    | 4     | 50.0000  | 100.0000 | 3.2270 | 0.0330 |
| 61  | response to pest\, pathogen or parasite                        | P | 50  | 502  | 553   | 9.9602   | 90.7776  | 2.1270 | 0.0340 |
| 62  | actin polymerization and/or depolymerization                   | P | 8   | 52   | 54    | 15.3846  | 96.2963  | 2.1610 | 0.0360 |
| 63  | actin filament-based movement                                  | P | 4   | 18   | 18    | 22.2222  | 100.0000 | 2.3720 | 0.0360 |
| 64  | negative regulation of transcription factor activity           | P | 2   | 5    | 6     | 40.0000  | 83.3333  | 2.7590 | 0.0370 |
| 65  | activation of NF-kappaB-inducing kinase                        | P | 3   | 11   | 11    | 27.2727  | 100.0000 | 2.4900 | 0.0370 |
| 66  | protein amino acid O-linked glycosylation                      | P | 4   | 18   | 21    | 22.2222  | 85.7143  | 2.3720 | 0.0370 |
| 67  | activation of MAPKKK activity                                  | P | 2   | 5    | 5     | 40.0000  | 100.0000 | 2.7590 | 0.0380 |
| 68  | calcium-mediated signaling                                     | P | 5   | 26   | 29    | 19.2308  | 89.6552  | 2.2720 | 0.0380 |
| 69  | antigen presentation\, exogenous antigen                       | P | 4   | 17   | 21    | 23.5294  | 80.9524  | 2.5100 | 0.0390 |
| 70  | response to pathogenic bacteria                                | P | 4   | 19   | 20    | 21.0526  | 95.0000  | 2.2440 | 0.0390 |
| 71  | cotranslational protein targeting to membrane                  | P | 3   | 12   | 13    | 25.0000  | 92.3077  | 2.3020 | 0.0400 |
| 72  | cell proliferation                                             | P | 59  | 609  | 648   | 9.6880   | 93.9815  | 2.0910 | 0.0400 |
| 73  | heparan sulfate proteoglycan metabolism                        | P | 3   | 11   | 12    | 27.2727  | 91.6667  | 2.4900 | 0.0440 |
| 74  | antigen presentation\, exogenous peptide antigen               | P | 2   | 5    | 6     | 40.0000  | 83.3333  | 2.7590 | 0.0450 |
| 75  | transport                                                      | P | 215 | 2540 | 2884  | 8.4646   | 88.0721  | 2.0240 | 0.0480 |
| 76  | actin filament severing                                        | P | 2   | 5    | 5     | 40.0000  | 100.0000 | 2.7590 | 0.0490 |
| 77  | negative regulation of axon extension                          | P | 2   | 5    | 5     | 40.0000  | 100.0000 | 2.7590 | 0.0490 |
| 78  | protein binding\, bridging                                     | F | 13  | 59   | 64    | 22.0339  | 92.1875  | 4.2460 | 0.0000 |
| 79  | cytoskeletal protein binding                                   | F | 44  | 315  | 344   | 13.9683  | 91.5698  | 4.4040 | 0.0000 |
| 80  | receptor signaling protein activity                            | F | 21  | 137  | 148   | 15.3285  | 92.5676  | 3.4940 | 0.0000 |
| 81  | SH3/SH2 adaptor activity                                       | F | 11  | 39   | 42    | 28.2051  | 92.8571  | 4.9140 | 0.0000 |
| 82  | actin binding                                                  | F | 28  | 207  | 230   | 13.5266  | 90.0000  | 3.3140 | 0.0000 |
| 83  | binding                                                        | F | 763 | 9101 | 10565 | 8.3837   | 86.1429  | 5.1640 | 0.0000 |
| 84  | protein binding                                                | F | 440 | 4715 | 5185  | 9.3319   | 90.9354  | 5.7840 | 0.0000 |
| 85  | casein kinase I activity                                       | F | 3   | 3    | 3     | 100.0000 | 100.0000 | 6.0820 | 0.0010 |
| 86  | transcriptional repressor activity                             | F | 27  | 203  | 212   | 13.3005  | 95.7547  | 3.1580 | 0.0020 |
| 87  | phospholipid binding                                           | F | 17  | 107  | 117   | 15.8879  | 91.4530  | 3.3050 | 0.0030 |
| 88  | protein serine/threonine kinase activity                       | F | 50  | 435  | 488   | 11.4943  | 89.1393  | 3.2080 | 0.0030 |
| 89  | v-SNARE activity                                               | F | 2   | 2    | 2     | 100.0000 | 100.0000 | 4.9660 | 0.0040 |
| 90  | phosphotyrosine binding                                        | F | 3   | 5    | 5     | 60.0000  | 100.0000 | 4.4570 | 0.0040 |
| 91  | structural constituent of ribosome                             | F | 24  | 183  | 354   | 13.1148  | 51.6949  | 2.9000 | 0.0040 |
| 92  | protein kinase activity                                        | F | 59  | 545  | 612   | 10.8257  | 89.0523  | 3.0010 | 0.0050 |
| 93  | nucleotide binding                                             | F | 158 | 1750 | 1959  | 9.0286   | 89.3313  | 2.5820 | 0.0050 |
| 94  | myosin binding                                                 | F | 3   | 7    | 7     | 42.8571  | 100.0000 | 3.5520 | 0.0070 |
| 95  | kinase activity                                                | F | 78  | 786  | 887   | 9.9237   | 88.6133  | 2.6490 | 0.0070 |
| 96  | chromatin binding                                              | F | 13  | 81   | 88    | 16.0494  | 92.0455  | 2.9280 | 0.0080 |
| 97  | protein-tyrosine kinase activity                               | F | 37  | 317  | 340   | 11.6719  | 93.2353  | 2.8490 | 0.0080 |
| 98  | calmodulin binding                                             | F | 14  | 98   | 102   | 14.2857  | 96.0784  | 2.5580 | 0.0090 |
| 99  | protein kinase binding                                         | F | 10  | 53   | 62    | 18.8679  | 85.4839  | 3.1470 | 0.0100 |
| 100 | protein tyrosine phosphatase activity                          | F | 11  | 68   | 79    | 16.1765  | 86.0760  | 2.7220 | 0.0110 |
| 101 | intracellular calcium activated chloride channel activity      | F | 2   | 3    | 3     | 66.6667  | 100.0000 | 3.8900 | 0.0130 |
| 102 | MHC class II receptor activity                                 | F | 3   | 7    | 11    | 42.8571  | 63.6364  | 3.5520 | 0.0130 |
| 103 | SH2 domain binding                                             | F | 4   | 15   | 15    | 26.6667  | 100.0000 | 2.8190 | 0.0130 |
| 104 | lipoprotein binding                                            | F | 6   | 24   | 26    | 25.0000  | 92.3077  | 3.2570 | 0.0140 |
| 105 | prenylated protein tyrosine phosphatase activity               | F | 3   | 8    | 10    | 37.5000  | 80.0000  | 3.2220 | 0.0150 |
| 106 | antigen binding                                                | F | 7   | 34   | 63    | 20.5882  | 93.9683  | 2.9000 | 0.0170 |
| 107 | hematopoietin/interferon-class (D200-domain) cytokine receptor | F | 2   | 3    | 3     | 66.6667  | 100.0000 | 3.8900 | 0.0190 |
| 108 | MAP kinase activity                                            | F | 4   | 14   | 14    | 28.5714  | 100.0000 | 2.9940 | 0.0200 |
| 109 | lipid binding                                                  | F | 29  | 249  | 274   | 11.6466  | 90.8759  | 2.5040 | 0.0220 |
| 110 | GTP binding                                                    | F | 33  | 301  | 335   | 10.9635  | 89.8508  | 2.3030 | 0.0230 |
| 111 | phosphatidylinositol transporter activity                      | F | 2   | 4    | 5     | 50.0000  | 80.0000  | 3.2270 | 0.0270 |
| 112 | translation activator activity                                 | F | 2   | 4    | 4     | 50.0000  | 100.0000 | 3.2270 | 0.0310 |
| 113 | non-membrane spanning protein tyrosine kinase activity         | F | 3   | 12   | 12    | 25.0000  | 100.0000 | 2.3020 | 0.0310 |
| 114 | thyroid hormone receptor binding                               | F | 4   | 17   | 18    | 23.5294  | 94.4444  | 2.5100 | 0.0320 |
| 115 | catalytic activity                                             | F | 382 | 4686 | 5420  | 8.1519   | 86.4576  | 2.0450 | 0.0320 |
| 116 | oxygen transporter activity                                    | F | 4   | 17   | 21    | 23.5294  | 80.9524  | 2.5100 | 0.0330 |
| 117 | hematopoietin/interferon-class (D200-domain) cytokine receptor | F | 9   | 58   | 60    | 15.5172  | 96.6667  | 2.3220 | 0.0340 |
| 118 | 1-alkyl-2-acetylglycerophosphocholine esterase activity        | F | 2   | 4    | 4     | 50.0000  | 100.0000 | 3.2270 | 0.0350 |
| 119 | phosphoinositide 3-kinase regulator activity                   | F | 2   | 5    | 5     | 40.0000  | 100.0000 | 2.7590 | 0.0390 |
| 120 | SH3 domain binding                                             | F | 4   | 18   | 18    | 22.2222  | 100.0000 | 2.3720 | 0.0400 |
| 121 | sulfuric ester hydrolase activity                              | F | 3   | 11   | 12    | 27.2727  | 91.6667  | 2.4900 | 0.0480 |
| 122 | GTPase activator activity                                      | F | 15  | 119  | 132   | 12.6050  | 90.1515  | 2.1220 | 0.0480 |
| 123 | retinoid X receptor binding                                    | F | 2   | 5    | 5     | 40.0000  | 100.0000 | 2.7590 | 0.0490 |
| 124 | Golgi membrane                                                 | C | 18  | 102  | 104   | 17.6471  | 98.0769  | 3.9030 | 0.0000 |
| 125 | Golgi apparatus                                                | C | 55  | 435  | 471   | 12.6437  | 92.3567  | 4.1320 | 0.0000 |
| 126 | cytosol                                                        | C | 44  | 344  | 383   | 12.7907  | 89.8172  | 3.7680 | 0.0000 |
| 127 | endoplasmic reticulum                                          | C | 63  | 528  | 561   | 11.9318  | 94.1177  | 3.9350 | 0.0000 |
| 128 | intracellular                                                  | C | 651 | 6933 | 8118  | 9.3899   | 85.4028  | 8.2010 | 0.0000 |
| 129 | cytoplasm                                                      | C | 341 | 3484 | 3969  | 9.7876   | 87.7803  | 5.8600 | 0.0000 |
| 130 | ribosome                                                       | C | 24  | 176  | 345   | 13.6364  | 51.0145  | 3.1080 | 0.0020 |
| 131 | nucleus                                                        | C | 286 | 3274 | 3798  | 8.7355   | 86.2033  | 3.0380 | 0.0020 |
| 132 | Golgi stack                                                    | C | 34  | 289  | 310   | 11.7647  | 93.2258  | 2.7780 | 0.0040 |
| 133 | immunological synapse                                          | C | 9   | 44   | 51    | 20.4546  | 86.2745  | 3.2660 | 0.0050 |
| 134 | vacuole                                                        | C | 20  | 141  | 148   | 14.1844  | 95.2703  | 3.0270 | 0.0050 |
| 135 | cytosolic small ribosomal subunit (sensu Eukaryota)            | C | 5   | 14   | 16    | 35.7143  | 87.5000  | 4.0090 | 0.0050 |
| 136 | cytoplasmic membrane-bound vesicle                             | C | 27  | 206  | 221   | 13.1068  | 93.2127  | 3.0750 | 0.0050 |
| 137 | MHC class II protein complex                                   | C | 2   | 2    | 2     | 100.0000 | 100.0000 | 4.9660 | 0.0070 |
| 138 | external side of plasma membrane                               | C | 12  | 76   | 80    | 15.7895  | 95.0000  | 2.7500 | 0.0120 |

|     |                                       |   |    |     |     |         |          |        |        |
|-----|---------------------------------------|---|----|-----|-----|---------|----------|--------|--------|
| 139 | insoluble fraction                    | C | 5  | 20  | 21  | 25.0000 | 95.2381  | 2.9720 | 0.0140 |
| 140 | cell surface                          | C | 20 | 156 | 164 | 12.8205 | 95.1220  | 2.5350 | 0.0150 |
| 141 | peroxisomal membrane                  | C | 5  | 21  | 22  | 23.8095 | 95.4545  | 2.8390 | 0.0160 |
| 142 | lysosome                              | C | 17 | 123 | 129 | 13.8211 | 95.3488  | 2.6710 | 0.0160 |
| 143 | Arp2/3 protein complex                | C | 3  | 8   | 8   | 37.5000 | 100.0000 | 3.2220 | 0.0190 |
| 144 | female pronucleus                     | C | 2  | 3   | 3   | 66.6667 | 100.0000 | 3.8900 | 0.0210 |
| 145 | clathrin vesicle coat                 | C | 7  | 36  | 40  | 19.4444 | 90.0000  | 2.7230 | 0.0220 |
| 146 | unconventional myosin                 | C | 2  | 4   | 4   | 50.0000 | 100.0000 | 3.2270 | 0.0250 |
| 147 | actin cytoskeleton                    | C | 24 | 206 | 229 | 11.6505 | 89.9563  | 2.2760 | 0.0280 |
| 148 | chromosome                            | C | 30 | 279 | 364 | 10.7527 | 76.6484  | 2.0810 | 0.0320 |
| 149 | DNA-directed RNA polymerase I complex | C | 2  | 5   | 5   | 40.0000 | 100.0000 | 2.7590 | 0.0360 |
| 150 | focal adhesion                        | C | 5  | 24  | 26  | 20.8333 | 92.3077  | 2.4810 | 0.0360 |
| 151 | integral to peroxisomal membrane      | C | 3  | 11  | 11  | 27.2727 | 100.0000 | 2.4900 | 0.0370 |
| 152 | cellular component unknown            | C | 38 | 368 | 404 | 10.3261 | 91.0891  | 2.0830 | 0.0460 |

| B                            |                                                          |                   |                    |                    |                    |                    |                    |                     |                     |
|------------------------------|----------------------------------------------------------|-------------------|--------------------|--------------------|--------------------|--------------------|--------------------|---------------------|---------------------|
| UP-REGULATED - GENMAPP       |                                                          |                   |                    |                    |                    |                    |                    |                     |                     |
| No.                          | MAPP Name                                                | Number<br>Changed | Number<br>Measured | Number<br>on MAPP  | Percent<br>Changed | Percent<br>Present | Z<br>Score         | Permuted<br>P Value |                     |
| 1                            | Mm_Cholesterol_Biosynthesis                              | 8                 | 15                 | 15                 | 53.3333            | 100.0000           | 9.2890             | 0.0000              |                     |
| 2                            | Mm_Tyrosine_metabolism                                   | 6                 | 32                 | 82                 | 18.7500            | 39.0244            | 3.9920             | 0.0010              |                     |
| 3                            | Mm_Methionine_metabolism                                 | 3                 | 8                  | 26                 | 37.5000            | 30.7692            | 4.5860             | 0.0020              |                     |
| 4                            | Mm_Selenoamino_acid_metabolism                           | 4                 | 13                 | 26                 | 30.7692            | 50.0000            | 4.6610             | 0.0030              |                     |
| 5                            | Mm_Synthesis_and_degradation_of_ketone_bodies            | 2                 | 3                  | 7                  | 66.6667            | 42.8571            | 5.2780             | 0.0080              |                     |
| 6                            | Mm_Galactose_metabolism                                  | 4                 | 19                 | 46                 | 21.0526            | 41.3044            | 3.5630             | 0.0120              |                     |
| 7                            | Mm_TNF-alpha-NF-kB_NetPath_9                             | 14                | 166                | 176                | 8.4337             | 94.3182            | 2.6100             | 0.0170              |                     |
| 8                            | Mm_Steroid_Biosynthesis                                  | 3                 | 13                 | 13                 | 23.0769            | 100.0000           | 3.3030             | 0.0180              |                     |
| 9                            | Mm_IL-9_NetPath_20                                       | 4                 | 23                 | 24                 | 17.3913            | 95.8333            | 3.0610             | 0.0190              |                     |
| 10                           | Mm_Mitochondrial_fatty_acid_betaoxidation                | 3                 | 16                 | 16                 | 18.7500            | 100.0000           | 2.8180             | 0.0260              |                     |
| 11                           | Mm_Circadian_Exercise                                    | 6                 | 48                 | 49                 | 12.5000            | 97.9592            | 2.7690             | 0.0270              |                     |
| 12                           | Mm_Alkaloid_biosynthesis_I                               | 2                 | 6                  | 38                 | 33.3333            | 15.7895            | 3.4710             | 0.0280              |                     |
| 13                           | Mm_Cysteine_metabolism                                   | 2                 | 7                  | 26                 | 28.5714            | 26.9231            | 3.1330             | 0.0320              |                     |
| 14                           | Mm_Aminophosphonate_metabolism                           | 2                 | 7                  | 19                 | 28.5714            | 36.8421            | 3.1330             | 0.0330              |                     |
| 15                           | Mm_Glycerolipid_metabolism                               | 7                 | 72                 | 122                | 9.7222             | 59.0164            | 2.2390             | 0.0360              |                     |
| 16                           | Mm_Proteasome_Degradation                                | 7                 | 73                 | 81                 | 9.5890             | 90.1235            | 2.1980             | 0.0370              |                     |
| 17                           | Mm_Androgen_and_estrogen_metabolism                      | 4                 | 28                 | 42                 | 14.2857            | 66.6667            | 2.5740             | 0.0380              |                     |
| UP-REGULATED - GENE ONTOLOGY |                                                          |                   |                    |                    |                    |                    |                    |                     |                     |
| No.                          | GO Name                                                  | GO<br>Type        | Number<br>Changed  | Number<br>Measured | Number<br>in GO    | Percent<br>Changed | Percent<br>Present | Z<br>Score          | Permuted<br>P Value |
| 1                            | sterol biosynthesis                                      | P                 | 11                 | 25                 | 27                 | 44.0000            | 92.5926            | 11.4690             | 0.0000              |
| 2                            | retrograde protein transport\, ER to cytosol             | P                 | 3                  | 4                  | 4                  | 75.0000            | 100.0000           | 8.0730              | 0.0000              |
| 3                            | RNA processing                                           | P                 | 26                 | 329                | 371                | 7.9027             | 88.6792            | 4.7860              | 0.0000              |
| 4                            | steroid biosynthesis                                     | P                 | 15                 | 70                 | 74                 | 21.4286            | 94.5946            | 8.5700              | 0.0000              |
| 5                            | ER-associated protein catabolism                         | P                 | 4                  | 12                 | 12                 | 33.3333            | 100.0000           | 5.8620              | 0.0000              |
| 6                            | biosynthesis                                             | P                 | 76                 | 1154               | 1428               | 6.5858             | 80.8123            | 6.6100              | 0.0000              |
| 7                            | mRNA processing                                          | P                 | 15                 | 173                | 198                | 8.6705             | 87.3737            | 4.0230              | 0.0000              |
| 8                            | response to unfolded protein                             | P                 | 10                 | 46                 | 55                 | 21.7391            | 83.6364            | 7.0600              | 0.0000              |
| 9                            | amino acid metabolism                                    | P                 | 19                 | 245                | 273                | 7.7551             | 89.7436            | 3.9870              | 0.0000              |
| 10                           | cholesterol biosynthesis                                 | P                 | 9                  | 20                 | 22                 | 45.0000            | 90.9091            | 10.5080             | 0.0000              |
| 11                           | lipid metabolism                                         | P                 | 35                 | 581                | 616                | 6.0241             | 94.3182            | 3.8170              | 0.0000              |
| 12                           | protein transport                                        | P                 | 37                 | 589                | 654                | 6.2818             | 90.0612            | 4.2030              | 0.0000              |
| 13                           | metabolism                                               | P                 | 286                | 6705               | 7938               | 4.2655             | 84.4671            | 6.2400              | 0.0000              |
| 14                           | ubiquitin cycle                                          | P                 | 28                 | 437                | 511                | 6.4073             | 85.5186            | 3.7510              | 0.0000              |
| 15                           | establishment of protein localization                    | P                 | 37                 | 617                | 684                | 5.9968             | 90.2047            | 3.8990              | 0.0010              |
| 16                           | glycogen metabolism                                      | P                 | 5                  | 28                 | 28                 | 17.8571            | 100.0000           | 4.3480              | 0.0010              |
| 17                           | aromatic compound metabolism                             | P                 | 11                 | 101                | 108                | 10.8911            | 93.5185            | 4.3260              | 0.0010              |
| 18                           | RNA splicing                                             | P                 | 13                 | 144                | 167                | 9.0278             | 86.2276            | 3.9090              | 0.0010              |
| 19                           | ER to Golgi vesicle-mediated transport                   | P                 | 8                  | 53                 | 59                 | 15.0943            | 89.8305            | 4.8540              | 0.0010              |
| 20                           | nuclear mRNA splicing\, via spliceosome                  | P                 | 12                 | 118                | 135                | 10.1695            | 87.4074            | 4.2360              | 0.0010              |
| 21                           | intracellular protein transport                          | P                 | 26                 | 415                | 463                | 6.2651             | 89.6328            | 3.4870              | 0.0010              |
| 22                           | protein folding                                          | P                 | 17                 | 200                | 227                | 8.5000             | 88.1057            | 4.1930              | 0.0010              |
| 23                           | ubiquitin-dependent protein catabolism                   | P                 | 11                 | 132                | 149                | 8.3333             | 88.5906            | 3.2900              | 0.0020              |
| 24                           | retrograde axon cargo transport                          | P                 | 2                  | 4                  | 4                  | 50.0000            | 100.0000           | 5.2590              | 0.0030              |
| 25                           | positive regulation of nitric oxide biosynthesis         | P                 | 2                  | 4                  | 4                  | 50.0000            | 100.0000           | 5.2590              | 0.0040              |
| 26                           | catecholamine metabolism                                 | P                 | 4                  | 17                 | 20                 | 23.5294            | 85.0000            | 4.7030              | 0.0050              |
| 27                           | unfolded protein response                                | P                 | 3                  | 9                  | 9                  | 33.3333            | 100.0000           | 5.0760              | 0.0050              |
| 28                           | nitric oxide biosynthesis                                | P                 | 4                  | 18                 | 19                 | 22.2222            | 94.7368            | 4.5280              | 0.0060              |
| 29                           | protein modification                                     | P                 | 65                 | 1476               | 1665               | 4.4038             | 88.6487            | 2.5930              | 0.0060              |
| 30                           | transport                                                | P                 | 106                | 2540               | 2884               | 4.1732             | 88.0721            | 2.8290              | 0.0060              |
| 31                           | response to sterol depletion                             | P                 | 2                  | 4                  | 4                  | 50.0000            | 100.0000           | 5.2590              | 0.0070              |
| 32                           | mRNA splice site selection                               | P                 | 3                  | 13                 | 15                 | 23.0769            | 86.6667            | 4.0210              | 0.0090              |
| 33                           | ribosome biogenesis                                      | P                 | 8                  | 79                 | 84                 | 10.1266            | 94.0476            | 3.4400              | 0.0110              |
| 34                           | protein polymerization                                   | P                 | 5                  | 43                 | 50                 | 11.6279            | 86.0000            | 3.0900              | 0.0120              |
| 35                           | negative regulation of apoptosis                         | P                 | 11                 | 161                | 171                | 6.8323             | 94.1521            | 2.5600              | 0.0150              |
| 36                           | microtubule-based movement                               | P                 | 8                  | 89                 | 114                | 8.9888             | 78.0702            | 3.0470              | 0.0150              |
| 37                           | regulation of cell redox homeostasis                     | P                 | 2                  | 6                  | 6                  | 33.3333            | 100.0000           | 4.1450              | 0.0160              |
| 38                           | phosphatidylinositol biosynthesis                        | P                 | 2                  | 5                  | 5                  | 40.0000            | 100.0000           | 4.6220              | 0.0170              |
| 39                           | protein sumoylation                                      | P                 | 2                  | 6                  | 9                  | 33.3333            | 66.6667            | 4.1450              | 0.0170              |
| 40                           | NLS-bearing substrate import into nucleus                | P                 | 2                  | 7                  | 7                  | 28.5714            | 100.0000           | 3.7680              | 0.0170              |
| 41                           | galactose metabolism                                     | P                 | 2                  | 8                  | 8                  | 25.0000            | 100.0000           | 3.4600              | 0.0200              |
| 42                           | rRNA processing                                          | P                 | 6                  | 65                 | 70                 | 9.2308             | 92.8571            | 2.7120              | 0.0210              |
| 43                           | embryo implantation                                      | P                 | 3                  | 20                 | 21                 | 15.0000            | 95.2381            | 2.9540              | 0.0250              |
| 44                           | anti-apoptosis                                           | P                 | 9                  | 124                | 134                | 7.2581             | 92.5373            | 2.5120              | 0.0250              |
| 45                           | vesicle-mediated transport                               | P                 | 20                 | 379                | 406                | 5.2770             | 93.3498            | 2.2320              | 0.0260              |
| 46                           | chaperone cofactor dependent protein folding             | P                 | 2                  | 9                  | 10                 | 22.2222            | 90.0000            | 3.2010              | 0.0290              |
| 47                           | cell cycle                                               | P                 | 30                 | 629                | 681                | 4.7695             | 92.3642            | 2.1690              | 0.0290              |
| 48                           | glycine metabolism                                       | P                 | 2                  | 10                 | 11                 | 20.0000            | 90.9091            | 2.9780              | 0.0320              |
| 49                           | protein amino acid N-linked glycosylation via asparagine | P                 | 2                  | 10                 | 11                 | 20.0000            | 90.9091            | 2.9780              | 0.0380              |
| 50                           | protein amino acid methylation                           | P                 | 3                  | 23                 | 25                 | 13.0435            | 92.0000            | 2.6400              | 0.0400              |
| 51                           | CTP biosynthesis                                         | P                 | 2                  | 10                 | 12                 | 20.0000            | 83.3333            | 2.9780              | 0.0420              |
| 52                           | UTP biosynthesis                                         | P                 | 2                  | 10                 | 12                 | 20.0000            | 83.3333            | 2.9780              | 0.0420              |
| 53                           | response to oxidative stress                             | P                 | 5                  | 59                 | 63                 | 8.4746             | 93.6508            | 2.2560              | 0.0430              |
| 54                           | cell aging                                               | P                 | 2                  | 10                 | 10                 | 20.0000            | 100.0000           | 2.9780              | 0.0450              |
| 55                           | microtubule-based process                                | P                 | 10                 | 157                | 190                | 6.3694             | 82.6316            | 2.2000              | 0.0450              |
| 56                           | isoprenoid biosynthesis                                  | P                 | 2                  | 12                 | 16                 | 16.6667            | 75.0000            | 2.6130              | 0.0470              |

| 57                             | translational initiation                                   | P       | 5              | 58              | 72             | 8.6207          | 80.5556         | 2.2990  | 0.0480           |
|--------------------------------|------------------------------------------------------------|---------|----------------|-----------------|----------------|-----------------|-----------------|---------|------------------|
| 58                             | TPR domain binding                                         | F       | 2              | 2               | 2              | 100.0000        | 100.0000        | 7.6970  | 0.0000           |
| 59                             | protein carrier activity                                   | F       | 4              | 8               | 8              | 50.0000         | 100.0000        | 7.4390  | 0.0000           |
| 60                             | catalytic activity                                         | F       | 210            | 4686            | 5420           | 4.4814          | 86.4576         | 5.6700  | 0.0000           |
| 61                             | unfolded protein binding                                   | F       | 14             | 146             | 159            | 9.5890          | 91.8239         | 4.3200  | 0.0000           |
| 62                             | RNA binding                                                | F       | 31             | 466             | 548            | 6.6524          | 85.0365         | 4.1800  | 0.0000           |
| 63                             | transferase activity                                       | F       | 77             | 1559            | 1757           | 4.9391          | 88.7308         | 3.9310  | 0.0000           |
| 64                             | nucleotide binding                                         | F       | 82             | 1750            | 1959           | 4.6857          | 89.3313         | 3.5600  | 0.0000           |
| 65                             | 1-phosphatidylinositol 4-kinase activity                   | F       | 2              | 2               | 2              | 100.0000        | 100.0000        | 7.6970  | 0.0010           |
| 66                             | protein transporter activity                               | F       | 11             | 120             | 132            | 9.1667          | 90.9091         | 3.6520  | 0.0010           |
| 67                             | ligase activity                                            | F       | 24             | 382             | 449            | 6.2827          | 85.0780         | 3.3610  | 0.0010           |
| 68                             | 3-beta-hydroxy-delta5-steroid dehydrogenase activity       | F       | 3              | 9               | 11             | 33.3333         | 81.8182         | 5.0760  | 0.0030           |
| 69                             | protein serine/threonine phosphatase activity              | F       | 5              | 32              | 36             | 15.6250         | 88.8889         | 3.9380  | 0.0030           |
| 70                             | selenium binding                                           | F       | 4              | 25              | 27             | 16.0000         | 92.5926         | 3.5850  | 0.0040           |
| 71                             | Janus kinase activity                                      | F       | 2              | 4               | 4              | 50.0000         | 100.0000        | 5.2590  | 0.0060           |
| 72                             | protein phosphatase type 1 activity                        | F       | 3              | 9               | 10             | 33.3333         | 90.0000         | 5.0760  | 0.0060           |
| 73                             | isomerase activity                                         | F       | 10             | 136             | 153            | 7.3529          | 88.8889         | 2.6940  | 0.0080           |
| 74                             | magnesium ion binding                                      | F       | 16             | 253             | 273            | 6.3241          | 92.6740         | 2.7610  | 0.0090           |
| 75                             | MAP kinase phosphatase activity                            | F       | 3              | 10              | 10             | 30.0000         | 100.0000        | 4.7580  | 0.0100           |
| 76                             | ATP binding                                                | F       | 54             | 1180            | 1331           | 4.5763          | 88.6551         | 2.6410  | 0.0120           |
| 77                             | snoRNA binding                                             | F       | 2              | 6               | 6              | 33.3333         | 100.0000        | 4.1450  | 0.0130           |
| 78                             | binding                                                    | F       | 323            | 9101            | 10565          | 3.5491          | 86.1429         | 2.4610  | 0.0130           |
| 79                             | protein kinase C binding                                   | F       | 2              | 7               | 8              | 28.5714         | 87.5000         | 3.7680  | 0.0140           |
| 80                             | acyltransferase activity                                   | F       | 10             | 134             | 149            | 7.4627          | 89.9329         | 2.7460  | 0.0140           |
| 81                             | nuclear localization sequence binding                      | F       | 2              | 7               | 7              | 28.5714         | 100.0000        | 3.7680  | 0.0150           |
| 82                             | oxidoreductase activity                                    | F       | 33             | 662             | 775            | 4.9849          | 85.4194         | 2.5470  | 0.0160           |
| 83                             | nitric-oxide synthase regulator activity                   | F       | 2              | 5               | 6              | 40.0000         | 83.3333         | 4.6220  | 0.0170           |
| 84                             | inositol or phosphatidylinositol kinase activity           | F       | 4              | 29              | 33             | 13.7931         | 87.8788         | 3.1930  | 0.0170           |
| 85                             | phosphoric monoester hydrolase activity                    | F       | 13             | 211             | 239            | 6.1611          | 88.2845         | 2.3830  | 0.0170           |
| 86                             | kinase activity                                            | F       | 37             | 786             | 887            | 4.7074          | 88.6133         | 2.3370  | 0.0170           |
| 87                             | FK506 binding                                              | F       | 2              | 7               | 7              | 28.5714         | 100.0000        | 3.7680  | 0.0180           |
| 88                             | ribosome binding                                           | F       | 2              | 7               | 7              | 28.5714         | 100.0000        | 3.7680  | 0.0210           |
| 89                             | guanylate kinase activity                                  | F       | 2              | 6               | 8              | 33.3333         | 75.0000         | 4.1450  | 0.0220           |
| 90                             | porin activity                                             | F       | 3              | 19              | 19             | 15.7895         | 100.0000        | 3.0730  | 0.0220           |
| 91                             | Wnt receptor activity                                      | F       | 2              | 7               | 7              | 28.5714         | 100.0000        | 3.7680  | 0.0240           |
| 92                             | insulin-like growth factor receptor binding                | F       | 2              | 7               | 7              | 28.5714         | 100.0000        | 3.7680  | 0.0240           |
| 93                             | protein kinase binding                                     | F       | 5              | 53              | 62             | 9.4340          | 85.4839         | 2.5310  | 0.0240           |
| 94                             | protein domain specific binding                            | F       | 6              | 72              | 74             | 8.3333          | 97.2973         | 2.4250  | 0.0320           |
| 95                             | steroid delta-isomerase activity                           | F       | 2              | 9               | 10             | 22.2222         | 90.0000         | 3.2010  | 0.0330           |
| 96                             | dolichyl-diphosphooligosaccharide-protein glycotransferase | F       | 2              | 9               | 10             | 22.2222         | 90.0000         | 3.2010  | 0.0330           |
| 97                             | nucleoside diphosphate kinase activity                     | F       | 2              | 10              | 12             | 20.0000         | 83.3333         | 2.9780  | 0.0420           |
| 98                             | methyltransferase activity                                 | F       | 9              | 138             | 160            | 6.5217          | 86.2500         | 2.1620  | 0.0490           |
| 99                             | protein complex                                            | C       | 82             | 1750            | 2202           | 4.6857          | 79.4732         | 3.5600  | 0.0000           |
| 100                            | ribonucleoprotein complex                                  | C       | 26             | 355             | 550            | 7.3239          | 64.5455         | 4.3550  | 0.0000           |
| 101                            | intracellular                                              | C       | 298            | 6933            | 8118           | 4.2983          | 85.4028         | 6.6490  | 0.0000           |
| 102                            | soluble fraction                                           | C       | 17             | 173             | 183            | 9.8266          | 94.5355         | 4.8840  | 0.0000           |
| 103                            | endoplasmic reticulum                                      | C       | 43             | 528             | 561            | 8.1439          | 94.1177         | 6.4230  | 0.0000           |
| 104                            | mitochondrion                                              | C       | 42             | 730             | 822            | 5.7534          | 88.8078         | 3.8790  | 0.0000           |
| 105                            | cytoplasm                                                  | C       | 187            | 3484            | 3969           | 5.3674          | 87.7803         | 7.9880  | 0.0000           |
| 106                            | COPII vesicle coat                                         | C       | 3              | 7               | 7              | 42.8571         | 100.0000        | 5.8950  | 0.0010           |
| 107                            | endoplasmic reticulum membrane                             | C       | 11             | 104             | 109            | 10.5769         | 95.4128         | 4.2100  | 0.0010           |
| 108                            | nucleus                                                    | C       | 136            | 3274            | 3798           | 4.1539          | 86.2033         | 3.2430  | 0.0010           |
| 109                            | peroxisome                                                 | C       | 8              | 68              | 71             | 11.7647         | 95.7747         | 3.9520  | 0.0030           |
| 110                            | microsome                                                  | C       | 12             | 138             | 148            | 8.6957          | 93.2432         | 3.6060  | 0.0030           |
| 111                            | integral to endoplasmic reticulum membrane                 | C       | 5              | 34              | 35             | 14.7059         | 97.1429         | 3.7570  | 0.0040           |
| 112                            | perinuclear region                                         | C       | 5              | 37              | 40             | 13.5135         | 92.5000         | 3.5110  | 0.0080           |
| 113                            | spliceosome complex                                        | C       | 7              | 71              | 78             | 9.8592          | 91.0256         | 3.1330  | 0.0080           |
| 114                            | oligosaccharyl transferase complex                         | C       | 2              | 9               | 10             | 22.2222         | 90.0000         | 3.2010  | 0.0330           |
| 115                            | nuclear pore                                               | C       | 4              | 40              | 46             | 10.0000         | 86.9565         | 2.4000  | 0.0410           |
| DOWN-REGULATED - GENMAPP       |                                                            |         |                |                 |                |                 |                 |         |                  |
| No.                            | MAPP Name                                                  |         | Number Changed | Number Measured | Number on MAPP | Percent Changed | Percent Present | Z Score | Permuted P Value |
| 1                              | Mm_Insulin_Signaling                                       |         | 8              | 152             | 159            | 5.2632          | 95.5975         | 3.7220  | 0.0000           |
| 2                              | Mm_Nuclear_Receptors                                       |         | 4              | 38              | 38             | 10.5263         | 100.0000        | 4.4550  | 0.0010           |
| 3                              | Mm_Adipogenesis                                            |         | 8              | 129             | 132            | 6.2016          | 97.7273         | 4.2890  | 0.0010           |
| 4                              | Mm_B_Cell_Receptor_NetPath_12                              |         | 8              | 147             | 150            | 5.4422          | 98.0000         | 3.8360  | 0.0030           |
| 5                              | Mm_Riboflavin_metabolism                                   |         | 2              | 8               | 17             | 25.0000         | 47.0588         | 5.3300  | 0.0040           |
| 6                              | Mm_IL-6_NetPath_18                                         |         | 6              | 96              | 97             | 6.2500          | 98.9691         | 3.7240  | 0.0040           |
| 7                              | Mm_Delta-Notch_NetPath_3                                   |         | 5              | 77              | 80             | 6.4935          | 96.2500         | 3.5010  | 0.0050           |
| 8                              | Mm_Pantothenate_and_CoA_biosynthesis                       |         | 2              | 10              | 30             | 20.0000         | 33.3333         | 4.6880  | 0.0070           |
| 9                              | Mm_IL-7_NetPath_19                                         |         | 3              | 42              | 43             | 7.1429          | 97.6744         | 2.9150  | 0.0250           |
| 10                             | Mm_Circadian_Exercise                                      |         | 3              | 48              | 49             | 6.2500          | 97.9592         | 2.6180  | 0.0380           |
| 11                             | Mm_Apoptosis                                               |         | 4              | 83              | 83             | 4.8193          | 100.0000        | 2.4000  | 0.0380           |
| 12                             | Mm_EGFR1_NetPath_4                                         |         | 6              | 166             | 171            | 3.6145          | 97.0760         | 2.1550  | 0.0450           |
| DOWN-REGULATED - GENE ONTOLOGY |                                                            |         |                |                 |                |                 |                 |         |                  |
| No.                            | GO Name                                                    | GO Type | Number Changed | Number Measured | Number in GO   | Percent Changed | Percent Present | Z Score | Permuted P Value |
| 1                              | S-adenosylmethionine biosynthesis                          | P       | 2              | 2               | 2              | 100.0000        | 100.0000        | 11.5930 | 0.0000           |
| 2                              | Golgi to plasma membrane transport                         | P       | 2              | 3               | 4              | 66.6667         | 75.0000         | 9.3950  | 0.0010           |
| 3                              | embryonic cleavage                                         | P       | 2              | 4               | 4              | 50.0000         | 100.0000        | 8.0760  | 0.0010           |

|    |                                                   |   |     |      |       |          |          |         |        |
|----|---------------------------------------------------|---|-----|------|-------|----------|----------|---------|--------|
| 4  | vesicle transport along microtubule               | P | 2   | 5    | 5     | 40.0000  | 100.0000 | 7.1690  | 0.0020 |
| 5  | metabolism                                        | P | 123 | 6705 | 7938  | 1.8345   | 84.4671  | 3.3960  | 0.0020 |
| 6  | apoptotic program                                 | P | 4   | 56   | 61    | 7.1429   | 91.8033  | 3.5400  | 0.0030 |
| 7  | zinc ion homeostasis                              | P | 2   | 7    | 7     | 28.5714  | 100.0000 | 5.9670  | 0.0050 |
| 8  | nitric oxide mediated signal transduction         | P | 2   | 7    | 7     | 28.5714  | 100.0000 | 5.9670  | 0.0070 |
| 9  | response to cold                                  | P | 2   | 10   | 10    | 20.0000  | 100.0000 | 4.8770  | 0.0090 |
| 10 | acyl-CoA metabolism                               | P | 2   | 13   | 13    | 15.3846  | 100.0000 | 4.1760  | 0.0110 |
| 11 | electron transport                                | P | 11  | 386  | 461   | 2.8497   | 83.7310  | 2.2910  | 0.0210 |
| 12 | nucleotide metabolism                             | P | 7   | 194  | 236   | 3.6082   | 82.2034  | 2.4980  | 0.0240 |
| 13 | protein amino acid phosphorylation                | P | 15  | 560  | 622   | 2.6786   | 90.0322  | 2.4330  | 0.0310 |
| 14 | regulation of exocytosis                          | P | 2   | 17   | 17    | 11.7647  | 100.0000 | 3.5340  | 0.0330 |
| 15 | response to pathogenic bacteria                   | P | 2   | 19   | 20    | 10.5263  | 95.0000  | 3.2870  | 0.0360 |
| 16 | cell division                                     | P | 6   | 168  | 178   | 3.5714   | 94.3820  | 2.2830  | 0.0360 |
| 17 | response to oxidative stress                      | P | 3   | 59   | 63    | 5.0847   | 93.6508  | 2.3170  | 0.0440 |
| 18 | ligand-dependent nuclear receptor activity        | F | 5   | 51   | 53    | 9.8039   | 96.2264  | 4.9620  | 0.0000 |
| 19 | thyroid hormone receptor activity                 | F | 3   | 7    | 8     | 42.8571  | 87.5000  | 9.1120  | 0.0000 |
| 20 | 2'-phosphotransferase activity                    | F | 2   | 2    | 2     | 100.0000 | 100.0000 | 11.5930 | 0.0020 |
| 21 | nucleotide diphosphatase activity                 | F | 2   | 6    | 6     | 33.3333  | 100.0000 | 6.4950  | 0.0030 |
| 22 | steroid hormone receptor activity                 | F | 4   | 49   | 50    | 8.1633   | 98.0000  | 3.9060  | 0.0040 |
| 23 | ephrin receptor binding                           | F | 2   | 7    | 7     | 28.5714  | 100.0000 | 5.9670  | 0.0060 |
| 24 | transforming growth factor beta receptor activity | F | 2   | 13   | 14    | 15.3846  | 92.8571  | 4.1760  | 0.0150 |
| 25 | sodium ion binding                                | F | 4   | 66   | 69    | 6.0606   | 95.6522  | 3.1120  | 0.0190 |
| 26 | kinase activity                                   | F | 20  | 786  | 887   | 2.5445   | 88.6133  | 2.5840  | 0.0210 |
| 27 | protein kinase activity                           | F | 15  | 545  | 612   | 2.7523   | 89.0523  | 2.5450  | 0.0220 |
| 28 | microtubule binding                               | F | 3   | 42   | 44    | 7.1429   | 95.4545  | 3.0650  | 0.0230 |
| 29 | subtilase activity                                | F | 2   | 20   | 21    | 10.0000  | 95.2381  | 3.1770  | 0.0370 |
| 30 | protein serine/threonine kinase activity          | F | 12  | 435  | 488   | 2.7586   | 89.1393  | 2.2760  | 0.0370 |
| 31 | GTPase activator activity                         | F | 5   | 119  | 132   | 4.2017   | 90.1515  | 2.4920  | 0.0400 |
| 32 | ubiquitin-protein ligase activity                 | F | 7   | 219  | 259   | 3.1963   | 84.5560  | 2.1460  | 0.0410 |
| 33 | magnesium ion binding                             | F | 8   | 253  | 273   | 3.1621   | 92.6740  | 2.2630  | 0.0420 |
| 34 | binding                                           | F | 148 | 9101 | 10565 | 1.6262   | 86.1429  | 2.0500  | 0.0430 |
| 35 | presynaptic membrane                              | C | 2   | 10   | 10    | 20.0000  | 100.0000 | 4.8770  | 0.0140 |
| 36 | synaptic vesicle membrane                         | C | 2   | 11   | 12    | 18.1818  | 91.6667  | 4.6130  | 0.0180 |
| 37 | microsome                                         | C | 5   | 138  | 148   | 3.6232   | 93.2432  | 2.1180  | 0.0430 |
