# Supplementary material
Source: publisher figshare collection journal article supplement (https://karger.figshare.com/articles/dataset/_/4748017)

**Article Title:** Gene Expression Changes in Spleens and Livers of Tumour-Bearing Mice Suggest Anti-Inflammatory Effects of Oil Palm Phenolics in Delaying Tumour Growth.

**Journal Name:** Journal of Nutrigenetics and Nutrigenomics.

**Author Names:** Soon-Sen Leow, Shamala Devi Sekaran, Kalyana Sundram, YewAi Tan, Ravigadevi Sambanthamurthi.

**Corresponding Author:** Ravigadevi Sambanthamurthi; Malaysian Palm Oil Board, No. 6, Persiaran Institusi, Bandar Baru Bangi, 43000 Kajang, Selangor, Malaysia; E-mail: [raviga@mpob.gov.my](mailto:raviga@mpob.gov.my).

#### **SUPPLEMENTARY MATERIAL 4.**

Gene ontology-based hierarchical clustering analysis of gene expression data obtained from livers across time. Note that the  $\log_2$  fold change of each treatment group against its time-matched control was represented using a blue-black-yellow (negative to positive) colour scheme. A  $\log_2$  fold change of 0.5 is equivalent to a fold change of 1.4142.

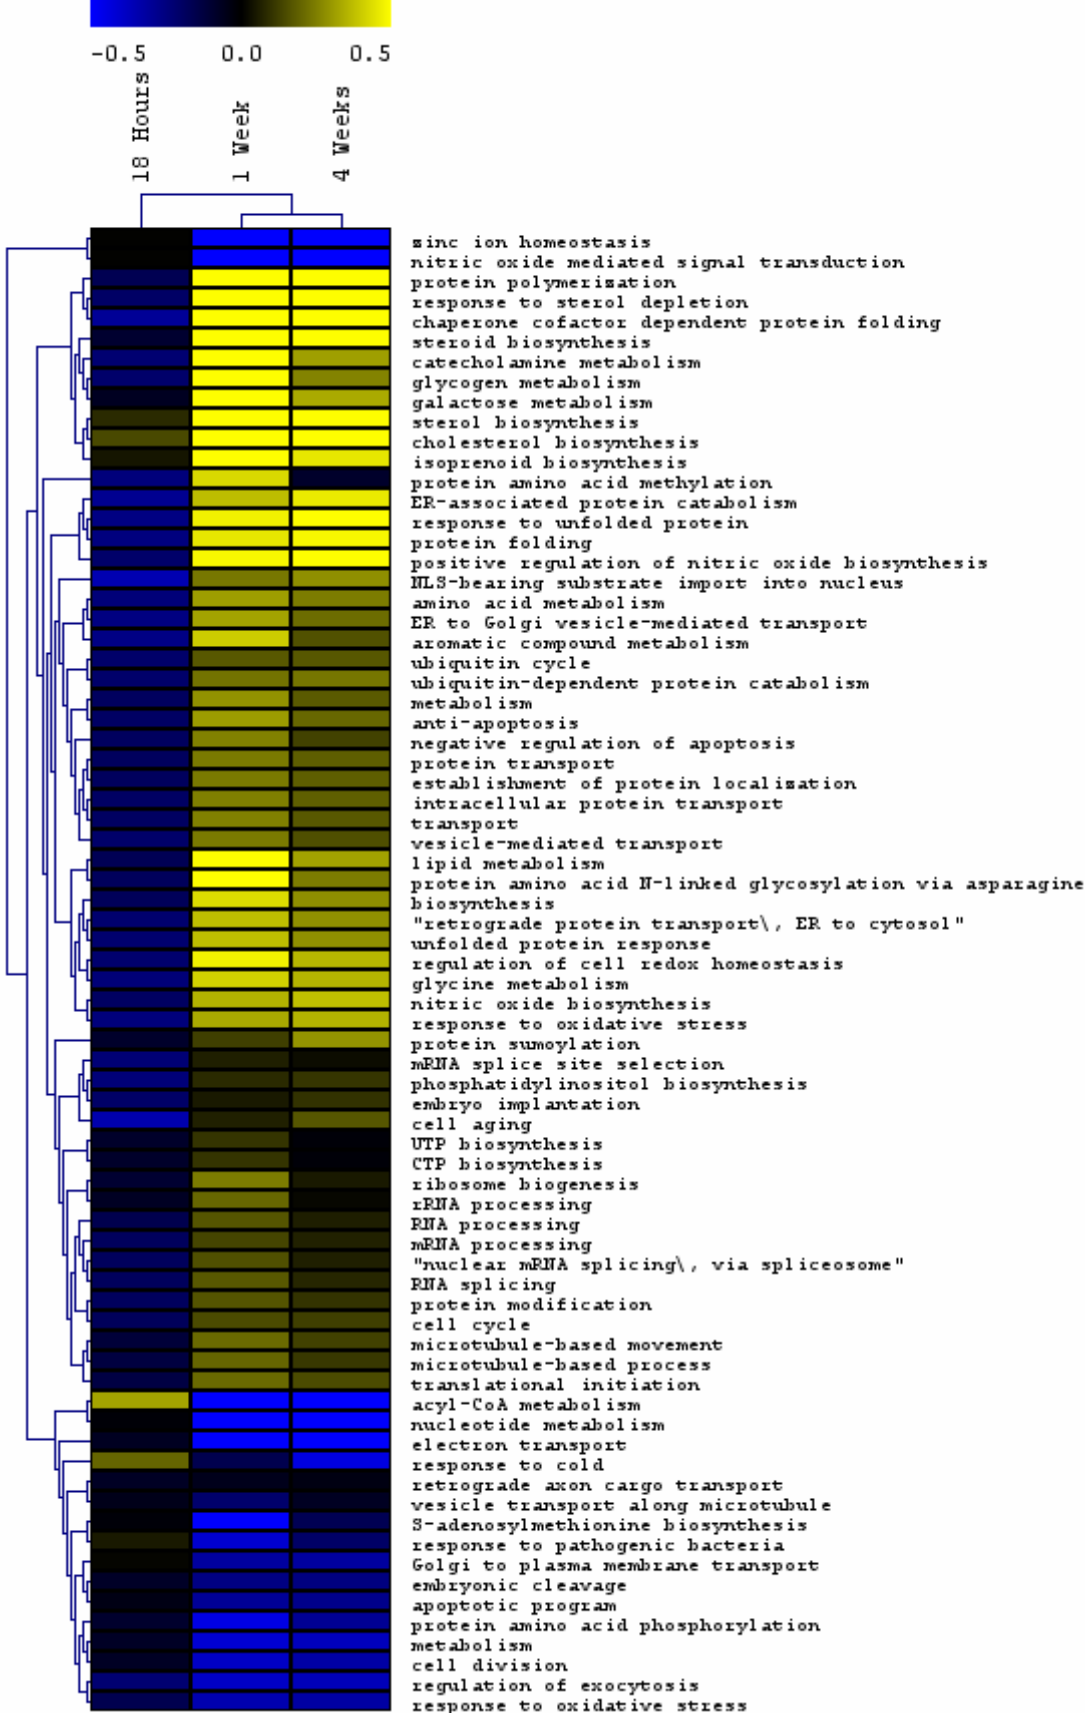

Supplement: Supplementary file 1 [file 1 › JNN_201305003_1_14.pdf]
